# Supplementary material for: Transcriptome Analysis of Human Endogenous Retroviruses at Locus-Specific Resolution in Non-Small Cell Lung Cancer
Source: MDPI journal article supplement (doi:10.3390/cancers14184433), 2022-09-13
Supplement: s1 [file s1]

| LUAD               |                |                   |                         | LUSC               |                |                   |                         |
|--------------------|----------------|-------------------|-------------------------|--------------------|----------------|-------------------|-------------------------|
| HERV<br>SUB-FAMILY | N. DE<br>HERVs | N. HERV<br>family | Perc. DE<br>HERV family | HERV<br>SUB-FAMILY | N. DE<br>HERVs | N. HERV<br>family | Perc. DE<br>HERV family |
| HERVH              | 236            | 1206              | 19,5                    | HERVH              | 378            | 1206              | 31,3                    |
| ERVLE-E            | 148            | 2240              | 6,6                     | ERV3-16A3_I        | 228            | 1983              | 11,5                    |
| HERVK              | 136            | 841               | 16,2                    | ERVLE-E            | 228            | 2240              | 10,2                    |
| ERV3-16A3_I        | 127            | 1983              | 6,4                     | HERVK              | 191            | 841               | 22,7                    |
| HERVL              | 84             | 1082              | 7,7                     | ERVLE-B4           | 142            | 1206              | 11,8                    |
| MER4               | 83             | 609               | 13,6                    | HERVL              | 132            | 1082              | 12,2                    |
| ERVLE-B4           | 71             | 1206              | 5,9                     | MER4               | 126            | 609               | 20,7                    |
| MER41              | 56             | 442               | 12,6                    | MER41              | 77             | 442               | 17,4                    |
| MER61              | 40             | 355               | 11,2                    | MER61              | 76             | 355               | 21,4                    |
| HARLEQUIN          | 36             | 154               | 23,4                    | HERV17             | 53             | 227               | 23,3                    |
