# Supplementary material for: Transcriptome Analysis of Human Endogenous Retroviruses at Locus-Specific Resolution in Non-Small Cell Lung Cancer
Source: MDPI journal article supplement (doi:10.3390/cancers14184433), 2022-09-13
Supplement: s1 [file s1]

| LUAD               |                  |                   |                           | LUSC               |                  |                   |                           |
|--------------------|------------------|-------------------|---------------------------|--------------------|------------------|-------------------|---------------------------|
| HERV<br>SUB-FAMILY | N. Expr<br>HERVs | N. HERV<br>family | Perc. Expr<br>HERV family | HERV<br>SUB-FAMILY | N. Expr<br>HERVs | N. HERV<br>family | Perc. Expr<br>HERV family |
| HERVH              | 575              | 1206              | 47,7                      | HERVH              | 651              | 1206              | 54                        |
| ERVL-E             | 438              | 2240              | 19,5                      | ERVL-E             | 449              | 2240              | 20                        |
| HERVK              | 366              | 841               | 43,5                      | ERV3-16A3_I        | 369              | 1983              | 18,6                      |
| ERV3-16A3_I        | 350              | 1983              | 17,6                      | HERVK              | 363              | 841               | 43,1                      |
| HERVL              | 245              | 1082              | 22,6                      | HERVL              | 259              | 1082              | 24                        |
| ERVL-B4            | 236              | 1206              | 19,5                      | ERVL-B4            | 245              | 1206              | 20,3                      |
| MER4               | 218              | 609               | 35,8                      | MER4               | 235              | 609               | 38,6                      |
| MER41              | 149              | 442               | 33,7                      | MER41              | 152              | 442               | 34,4                      |
| MER61              | 112              | 355               | 31,5                      | MER61              | 115              | 355               | 32,4                      |
| HERV17             | 100              | 227               | 44,1                      | HERV17             | 101              | 227               | 44,5                      |
