# Supplementary material for: Transcriptome Analysis of Human Endogenous Retroviruses at Locus-Specific Resolution in Non-Small Cell Lung Cancer
Source: MDPI journal article supplement (doi:10.3390/cancers14184433), 2022-09-13
Supplement: s1 [file s1]

Fig. S1

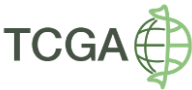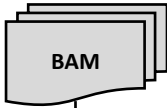

TCGA-LUAD and TCGA-LUSC  
raw sequencing data

Pre-processing

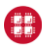

Ohio Supercomputer Center  
An OH-TECH Consortium Member

Conversion to  
FASTQ

BioBamBam2

Trimming and  
QC

Trim Galore

Alignment

Bowtie 2 (-k 100)

Sorting and  
indexing

Samtools

HERV  
annotation

Telescope

Raw  
Count  
matrix

Differential Expression Analysis

Survival Analysis

HERVs with a mean of TMM < 5  
across all samples were removed

Filtering

edgeR

Norm. and  
Diff. Expr.  
Analysis

LIMMA

D.E.  
HERVs

$|\text{Log2FC}| > 0.58$  and an  
adj.p.value < 0.05

Filtering

HERVs with a  
geometric mean of  
RPM < 1 across all  
samples were removed

Normalization

TMM  
matrix

Survival  
Analysis

Univariate  
Cox P-Val

HERV  
ass. with  
OS

HERV  
ass. with  
RFS

Pathway Analysis

RPM of  
D.E.  
HERVs

For both HERVs and coding-protein genes identified as differentially  
expressed (D.E.) in TCGA-LUAD and TCGA-LUSC, we extracted their  
original raw counts and we scaled them to Read Per Million mapped  
reads (RPM)

D.E.  
genes

RPM of  
D.E.  
genes

Correlation  
analysis

Spearman correlation

HERV-gene  
corr.matrix

HERV

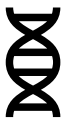

List of HERV's correlated genes with  
their ENTREZ IDs and Log2FC values

HERV  
correlated  
genes

Spearman corr. coef. > 0.2  
and adj.P.Value < 0.05

MITHrIL was runned for each HERV's  
correlated gene list.

Pathway  
analysis

MITHrIL

HERV-  
specific  
pathways

P.Value < 0.05

HERV-pathway  
clustering

ConsensusClusterPlus  
ComplexHeamap

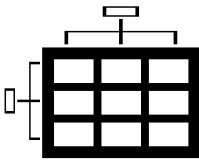

Heatmap with  
HERV-pathway  
clustering
