# Supplementary material for: Transcriptome Analysis of Human Endogenous Retroviruses at Locus-Specific Resolution in Non-Small Cell Lung Cancer
Source: MDPI journal article supplement (doi:10.3390/cancers14184433), 2022-09-13
Supplement: s1 [file s1]

| LUAD                               |             |                      |                                    |             |                      |
|------------------------------------|-------------|----------------------|------------------------------------|-------------|----------------------|
| 1 <sup>ST</sup> CLUSTER (148 HERV) |             |                      | 2 <sup>ND</sup> CLUSTER (328 HERV) |             |                      |
| HERV SUB-FAMILY                    | N. DE HERVs | Perc. DE HERV family | HERV SUB-FAMILY                    | N. DE HERVs | Perc. DE HERV family |
| ERVLE-E                            | 17          | 11.5                 | HERVH                              | 54          | 16.4                 |
| HERVH                              | 14          | 9.4                  | ERVLE-E                            | 32          | 9.7                  |
| ERV3-16A3_I                        | 13          | 8.8                  | HERVK                              | 25          | 7.6                  |
| HERVL                              | 11          | 7.4                  | MER4                               | 23          | 7.0                  |
| HERVK                              | 9           | 6.1                  | ERV3-16A3_I                        | 21          | 6.4                  |
| HERVL18                            | 8           | 5.4                  | ERVLE-B4                           | 20          | 6.1                  |
| ERVLE-B4                           | 7           | 4.7                  | MER41                              | 13          | 3.9                  |
| MER4                               | 6           | 4.1                  | HERVL                              | 12          | 3.6                  |
| HARLEQUIN                          | 5           | 3.4                  | MER61                              | 10          | 3.0                  |
| HERV9                              | 5           | 3.4                  | Harlequin                          | 9           | 2.7                  |

| 3 <sup>RD</sup> CLUSTER (710 HERV) |             |                      | 4 <sup>TH</sup> CLUSTER (211 HERV) |             |                      |
|------------------------------------|-------------|----------------------|------------------------------------|-------------|----------------------|
| HERV SUB-FAMILY                    | N. DE HERVs | Perc. DE HERV family | HERV SUB-FAMILY                    | N. DE HERVs | Perc. DE HERV family |
| HERVH                              | 101         | 14.2                 | HERVH                              | 44          | 20.8                 |
| ERVLE-E                            | 80          | 11.2                 | HERVK                              | 23          | 10.9                 |
| HERVK                              | 71          | 10.0                 | ERV3-16A3_I                        | 15          | 7.1                  |
| ERV3-16A3_I                        | 65          | 9.1                  | MER4                               | 14          | 6.6                  |
| HERVL                              | 36          | 5.1                  | HERVL                              | 13          | 6.1                  |
| MER4                               | 33          | 4.6                  | ERVLE-E                            | 10          | 4.7                  |
| ERVLE-B4                           | 32          | 4.5                  | ERVLE-B4                           | 8           | 3.8                  |
| MER41                              | 25          | 3.5                  | MER41                              | 8           | 3.8                  |
| HERVIP10F                          | 16          | 2.2                  | HERVE                              | 7           | 3.3                  |
| HERVL40                            | 16          | 2.2                  | HERVL18                            | 5           | 2.3                  |
