# Supplementary material for: Transcriptome Analysis of Human Endogenous Retroviruses at Locus-Specific Resolution in Non-Small Cell Lung Cancer
Source: MDPI journal article supplement (doi:10.3390/cancers14184433), 2022-09-13
Supplement: s1 [file s1]

| LUSC                                |                |                         |                                     |                |                         |                                     |                |                         |
|-------------------------------------|----------------|-------------------------|-------------------------------------|----------------|-------------------------|-------------------------------------|----------------|-------------------------|
| 1 <sup>ST</sup> CLUSTER (903 HERVs) |                |                         | 2 <sup>ND</sup> CLUSTER (510 HERVs) |                |                         | 3 <sup>rd</sup> CLUSTER (557 HERVs) |                |                         |
| HERV<br>SUB-FAMILY                  | N. DE<br>HERVs | Perc. DE<br>HERV family | HERV<br>SUB-FAMILY                  | N. DE<br>HERVs | Perc. DE<br>HERV family | HERV<br>Sub-family                  | N. DE<br>HERVs | Perc. DE<br>HERV family |
| HERVH                               | 113            | 12.5                    | HERVH                               | 107            | 21.0                    | HERVH                               | 78             | 14.0                    |
| HERVK                               | 95             | 10.5                    | ERVL-E                              | 46             | 9.0                     | ERVL-E                              | 59             | 10.6                    |
| ERVL-E                              | 79             | 8.7                     | ERV3-16A3_I                         | 44             | 8.6                     | ERV3-16A3_I                         | 58             | 10.4                    |
| ERV3-16A3_I                         | 77             | 8.5                     | MER4                                | 29             | 5.7                     | HERVK                               | 49             | 8.8                     |
| ERVL-B4                             | 59             | 6.5                     | ERVL-B4                             | 28             | 5.5                     | ERVL-B4                             | 33             | 5.9                     |
| HERVL                               | 51             | 5.6                     | HERVK                               | 28             | 5.5                     | MER4                                | 29             | 5.2                     |
| MER4                                | 41             | 4.5                     | HERVL                               | 27             | 5.3                     | HERVL                               | 27             | 4.8                     |
| MER41                               | 33             | 3.6                     | MER61                               | 18             | 3.5                     | MER41                               | 19             | 3.4                     |
| MER61                               | 28             | 3.1                     | MER41                               | 15             | 2.9                     | MER61                               | 19             | 3.4                     |
| HERVL40                             | 23             | 2.5                     | HERVE                               | 11             | 2.1                     | HERV17                              | 15             | 2.7                     |
