# Supplementary material for: Transcriptome Analysis of Human Endogenous Retroviruses at Locus-Specific Resolution in Non-Small Cell Lung Cancer
Source: Cancers (Basel). 2022 Sep 13;14(18):4433. doi: 10.3390/cancers14184433 (PMC9497127; doi:10.3390/cancers14184433)
Supplement: Supplementary file 1 [file cancers-14-04433-s001.zip]

Archive with 14 entries (14 files):
- figure_S1.pdf
- File_S1_TCGA_LUAD_telescope_raw_counts.txt
- File_S2_TCGA_LUSC_telescope_raw_counts.txt
- File_S3.xlsx
- File_S4.xlsx
- File_S5.xlsx
- File_S6.xlsx
- File_S7.xlsx
- File_S8.xlsx
- File_S9.cys
- Table_S1.pdf
- Table_S2.pdf
- Table_S3.pdf
- Table_S4.pdf
