# Supplementary material for: Transcriptome Analysis of Human Endogenous Retroviruses at Locus-Specific Resolution in Non-Small Cell Lung Cancer
Source: Cancers (Basel). 2022 Sep 13;14(18):4433. doi: 10.3390/cancers14184433 (PMC9497127; doi:10.3390/cancers14184433)
Supplement: Supplementary file 1 [file cancers-14-04433-s001.zip › File_S2_TCGA_LUSC_telescope_raw_counts.txt]

transcript	TCGA-18-3406-01A-01R-0980-07	TCGA-18-3407-01A-01R-0980-07	TCGA-18-3408-01A-01R-0980-07	TCGA-18-3409-01A-01R-0980-07	TCGA-18-3410-01A-01R-0980-07	TCGA-18-3411-01A-01R-0980-07	TCGA-18-3412-01A-01R-0980-07	TCGA-18-3414-01A-01R-0980-07	TCGA-18-3415-01A-01R-0980-07	TCGA-18-3416-01A-01R-0980-07	TCGA-18-3417-01A-01R-1443-07	TCGA-18-3419-01A-01R-0980-07	TCGA-18-3421-01A-01R-0980-07	TCGA-18-4083-01A-01R-1100-07	TCGA-18-4086-01A-01R-1100-07	TCGA-18-4721-01A-01R-1443-07	TCGA-18-5592-01A-01R-1635-07	TCGA-18-5595-01A-01R-1635-07	TCGA-21-1070-01A-01R-0692-07	TCGA-21-1071-01A-01R-0692-07	TCGA-21-1072-01A-01R-0692-07	TCGA-21-1075-01A-01R-0692-07	TCGA-21-1076-01A-01R-0692-07	TCGA-21-1076-01A-02R-0692-07	TCGA-21-1077-01A-01R-0692-07	TCGA-21-1078-01A-01R-0692-07	TCGA-21-1079-01A-01R-0692-07	TCGA-21-1080-01A-01R-0692-07	TCGA-21-1081-01A-01R-0692-07	TCGA-21-1082-01A-01R-0692-07	TCGA-21-1083-01A-01R-0692-07	TCGA-21-5782-01A-01R-1635-07	TCGA-21-5783-01A-41R-2187-07	TCGA-21-5784-01A-01R-1635-07	TCGA-21-5786-01A-01R-1635-07	TCGA-21-5787-01A-01R-1635-07	TCGA-21-A5DI-01A-31R-A26W-07	TCGA-22-0940-01A-01R-0692-07	TCGA-22-0944-01A-01R-0692-07	TCGA-22-1000-01A-01R-A32Z-07	TCGA-22-1002-01A-01R-0692-07	TCGA-22-1005-01A-01R-0692-07	TCGA-22-1011-01A-01R-0692-07	TCGA-22-1012-01A-01R-0692-07	TCGA-22-1016-01A-01R-0692-07	TCGA-22-1017-01A-01R-0692-07	TCGA-22-4591-01A-01R-1201-07	TCGA-22-4593-01A-21R-1820-07	TCGA-22-4593-11A-01R-1820-07
ERV316A3_10p11.1a	0	0	0	0	0	0	0	0	0	0	0	0	0	0	0	0	0	0	0	0	0	0	0	0	0	0	0	0	0	0	0	20	0	0	0	0	0	0	0	0	0	0	0	0	0	0	0	0	0
ERV316A3_10p11.1b	0	0	0	0	0	0	0	0	0	0	0	0	0	0	0	0	0	0	0	0	0	0	0	0	0	0	0	0	0	0	0	19	0	0	0	0	0	0	0	0	0	0	0	0	0	0	0	0	0
ERV316A3_10p11.21a	2	1	0	0	1	0	0	0	0	0	0	0	0	1	0	0	1	3	0	2	0	0	3	0	0	0	1	0	0	1	0	10	0	0	0	2	0	0	1	0	3	1	0	1	2	0	0	5	2
ERV316A3_10p11.21b	0	1	0	0	1	0	0	0	0	2	0	1	0	0	0	0	0	0	0	0	0	0	1	0	0	0	0	0	1	0	1	15	0	0	0	0	0	0	0	0	1	0	2	0	0	0	1	1	0
ERV316A3_10p11.21c	0	0	0	0	0	0	0	0	0	0	0	0	0	0	0	0	0	0	0	0	0	0	0	0	0	0	0	0	0	0	0	15	0	0	0	0	0	0	0	0	0	0	0	0	0	0	0	0	0
ERV316A3_10p11.21d	0	0	0	0	0	0	0	0	0	0	0	0	0	0	0	0	0	0	0	0	0	0	0	0	0	0	0	0	0	0	0	5	0	0	0	0	0	0	0	0	0	0	0	0	0	0	0	0	0
ERV316A3_10p11.21e	0	0	0	4	1	0	0	0	0	0	0	0	0	0	0	0	0	0	0	0	0	0	1	0	0	0	0	0	0	2	0	19	5	0	0	0	0	0	0	0	0	0	0	0	0	0	0	0	0
ERV316A3_10p11.21f	0	0	1	0	0	0	0	0	0	0	0	0	0	0	0	0	0	0	0	0	0	0	0	0	0	0	0	0	0	0	0	28	0	0	0	0	0	0	0	0	0	0	0	0	2	0	0	0	0
ERV316A3_10p11.22a	0	0	0	0	5	2	0	0	0	0	0	0	0	1	0	0	1	0	0	0	0	0	0	0	0	0	0	0	0	0	4	25	1	0	0	0	0	0	0	0	0	0	0	0	0	0	0	0	0
ERV316A3_10p11.22b	0	0	0	0	3	0	0	0	0	2	0	0	0	3	0	0	0	0	3	0	2	0	4	6	1	0	0	0	1	1	0	15	0	1	0	0	0	0	0	2	1	0	5	0	4	0	0	2	2
ERV316A3_10p11.22c	0	1	0	9	1	3	2	1	1	1	0	2	0	8	0	0	1	1	3	1	3	1	9	3	1	3	0	0	3	12	4	12	6	0	0	0	0	1	2	2	2	4	1	1	1	0	1	5	3
ERV316A3_10p11.22d	2	4	0	0	0	0	0	0	0	0	0	0	0	1	1	1	0	0	0	0	0	0	1	1	1	2	1	1	0	14	3	19	9	1	0	0	0	1	0	1	1	0	1	0	0	1	0	1	2
ERV316A3_10p11.22e	0	0	0	0	0	0	0	0	0	0	0	0	0	0	0	0	1	0	0	0	0	0	2	0	0	0	0	0	0	0	0	47	0	0	0	0	0	0	0	0	0	0	0	0	0	0	0	0	0
ERV316A3_10p11.23	0	0	0	0	0	0	0	0	0	0	0	0	0	0	0	0	0	0	0	0	0	0	1	0	0	0	0	0	0	0	0	5	0	0	0	0	0	0	0	0	0	0	0	0	0	0	0	0	0
ERV316A3_10p12.1a	0	0	1	0	0	0	0	0	0	0	0	0	0	3	0	0	0	0	0	1	0	0	1	0	1	1	0	0	1	1	0	22	2	0	0	1	0	0	0	1	0	0	1	0	1	0	0	0	0
ERV316A3_10p12.1b	0	0	0	0	0	0	0	0	0	0	0	0	0	0	0	0	0	0	0	0	0	0	0	0	0	0	0	0	0	0	0	10	0	0	0	0	0	0	0	0	0	0	0	0	1	0	0	0	0
ERV316A3_10p12.1c	0	0	0	0	0	0	0	0	0	0	0	0	0	0	0	0	0	0	0	0	0	0	0	0	0	0	0	0	0	0	0	35	0	0	0	0	0	0	0	0	0	0	0	0	0	0	0	0	0
ERV316A3_10p12.2	0	0	0	0	0	0	0	0	1	0	0	0	0	0	0	2	0	0	1	0	0	3	0	0	0	0	0	0	0	5	0	26	1	0	0	0	0	0	1	0	0	2	2	0	0	0	0	0	0
ERV316A3_10p12.31	0	0	0	0	2	0	0	0	0	0	0	0	0	0	0	0	0	0	0	0	0	0	0	0	0	0	0	2	1	1	0	24	0	0	0	0	0	0	0	0	0	0	0	0	0	1	0	0	0
ERV316A3_10p12.33	0	0	0	0	0	0	0	0	0	0	0	0	0	0	0	0	0	0	0	0	0	0	0	0	0	0	0	0	0	0	0	22	0	0	0	0	0	0	0	0	0	0	0	0	0	0	0	0	0
ERV316A3_10p13a	0	0	0	0	0	0	0	0	0	0	0	0	0	0	0	0	0	0	0	0	0	0	0	0	0	0	0	0	0	0	0	15	0	0	0	2	0	0	0	0	0	0	0	0	0	0	0	0	0
ERV316A3_10p13b	0	0	0	0	0	0	0	0	0	0	0	0	0	0	0	0	0	1	0	0	0	0	1	0	0	0	0	0	0	0	0	31	0	0	0	0	0	0	0	0	0	0	0	0	0	0	0	0	0
ERV316A3_10p14a	0	0	0	0	0	0	0	0	0	0	0	0	0	0	0	0	0	0	0	0	0	0	2	1	0	0	0	0	1	0	0	30	0	0	0	0	0	1	0	0	0	0	0	0	0	0	0	0	0
ERV316A3_10p14b	0	0	0	0	3	0	0	0	0	0	0	0	0	9	0	0	0	0	0	9	0	0	0	0	2	1	2	2	0	0	0	40	0	0	0	0	0	0	1	0	0	0	0	0	1	0	1	12	0
ERV316A3_10p14c	0	0	0	0	0	0	0	0	0	0	0	0	0	0	0	0	0	0	0	1	0	0	0	0	0	0	0	0	0	0	0	16	0	0	0	0	0	0	0	0	0	0	0	0	0	0	0	0	0
ERV316A3_10p14d	0	0	0	0	0	0	0	0	0	0	0	0	0	0	0	0	0	0	0	0	0	0	0	0	0	0	0	0	0	0	0	20	0	0	0	0	0	0	0	0	0	0	0	0	0	0	0	0	0
ERV316A3_10p15.1a	1	0	0	0	0	0	0	0	1	1	0	0	0	0	1	0	0	0	0	0	0	1	1	0	0	0	0	1	0	0	0	10	9	0	1	0	0	0	0	0	0	0	1	0	0	0	0	0	0
ERV316A3_10p15.1b	0	0	0	0	0	0	0	0	0	0	0	0	0	0	0	0	0	0	0	0	0	0	1	0	0	0	0	0	0	0	0	9	0	0	0	0	0	0	0	0	0	0	0	0	0	0	0	0	0
ERV316A3_10p15.1c	0	0	0	0	0	0	0	0	0	0	0	0	0	0	0	0	0	0	0	0	0	0	0	1	1	0	0	0	0	0	0	20	0	0	0	0	0	0	0	1	0	0	0	0	0	1	0	0	0
ERV316A3_10p15.1d	0	0	0	0	0	0	0	0	0	0	0	0	0	0	0	0	0	0	0	0	0	0	0	0	0	0	0	0	0	0	0	2	0	0	0	0	0	0	0	0	0	0	0	0	0	0	0	0	0
ERV316A3_10p15.2	0	0	0	0	0	0	0	0	0	0	0	0	0	0	0	0	0	0	0	0	0	0	1	0	0	0	0	0	0	0	0	27	0	0	0	0	0	0	0	0	0	0	0	0	0	0	0	0	0
ERV316A3_10p15.3a	0	2	0	0	0	0	0	0	0	0	0	0	0	0	0	0	0	0	0	0	0	0	1	0	0	0	0	0	0	0	0	10	0	0	0	0	0	0	0	0	0	0	0	0	0	0	0	0	0
ERV316A3_10p15.3b	0	0	0	0	3	0	0	0	0	0	0	0	0	0	0	0	0	0	0	0	0	0	1	0	0	0	0	0	0	0	2	13	0	0	0	0	0	0	0	0	0	0	0	0	0	0	0	0	0
ERV316A3_10p15.3c	0	0	0	0	0	0	0	0	0	0	0	0	0	0	0	0	0	0	0	0	0	0	3	0	0	0	0	0	0	0	0	9	0	0	0	0	0	0	0	0	0	0	0	0	0	0	0	0	0
ERV316A3_10p15.3d	0	0	0	0	0	0	0	0	0	0	0	0	0	0	0	0	0	0	0	0	0	0	1	0	0	0	0	0	0	0	0	5	0	0	0	0	0	0	0	0	0	0	0	0	0	0	0	0	0
ERV316A3_10q11.21a	0	0	0	0	0	0	0	0	0	0	0	0	0	0	0	0	0	0	0	0	0	0	0	0	0	0	0	0	0	0	0	32	0	0	0	0	0	0	0	0	0	0	0	0	0	0	0	0	0
ERV316A3_10q11.21b	0	0	0	0	0	0	0	0	0	0	0	0	0	0	0	0	0	0	0	0	0	0	3	0	0	0	0	0	0	0	0	14	0	0	0	0	0	0	0	0	0	0	0	0	0	0	0	0	0
ERV316A3_10q11.21c	0	0	1	1	0	0	2	0	0	0	0	0	0	0	0	0	0	0	0	0	0	0	1	0	0	4	0	0	0	0	2	12	0	3	0	1	0	0	0	3	0	1	0	3	4	3	0	2	5
ERV316A3_10q11.22a	0	0	0	0	0	0	0	0	0	1	0	0	0	0	0	0	0	0	0	0	0	0	1	0	0	0	0	0	0	0	0	19	0	0	0	0	0	0	0	0	0	0	0	0	0	0	0	0	0
ERV316A3_10q11.22b	0	0	0	0	0	0	0	0	0	0	0	0	0	0	0	0	0	0	0	0	0	0	1	0	0	0	0	0	0	0	0	45	0	0	0	0	0	0	0	0	0	0	0	0	0	0	0	0	0
ERV316A3_10q11.23a	2	0	0	1	0	0	0	0	0	0	0	0	0	1	1	0	0	3	0	1	0	0	0	0	0	0	0	0	0	0	3	13	9	0	0	0	0	0	0	0	0	0	1	0	0	0	0	0	0
ERV316A3_10q11.23b	0	0	0	0	0	0	0	0	0	0	0	0	0	0	0	0	2	0	0	0	0	0	0	0	0	0	0	0	0	0	1	33	0	0	0	0	0	0	0	0	0	0	0	0	0	0	0	0	0
ERV316A3_10q11.23c	0	0	0	0	0	0	0	0	0	0	0	0	0	2	0	0	0	0	0	0	0	0	0	0	0	0	0	0	0	0	0	11	0	0	0	0	0	0	0	0	0	0	0	0	0	0	0	0	0
ERV316A3_10q21.1a	0	0	0	0	0	0	0	0	0	0	0	0	0	0	0	0	0	0	0	0	0	0	1	0	0	0	0	0	0	0	0	51	0	0	0	0	0	0	0	0	0	0	0	0	1	0	0	0	0
ERV316A3_10q21.1b	0	0	0	0	0	0	0	0	0	0	0	0	0	0	0	0	0	0	0	0	0	0	0	0	0	0	0	0	0	0	0	6	0	0	0	0	0	0	0	0	1	0	0	0	0	0	0	1	0
ERV316A3_10q21.1c	0	0	0	0	0	0	0	0	0	0	0	0	0	1	0	0	0	0	0	0	2	0	0	0	0	0	0	0	0	0	0	30	0	0	0	0	0	0	0	0	0	0	0	0	0	0	0	0	0
ERV316A3_10q21.1d	0	0	0	0	0	0	0	0	0	0	0	0	0	0	0	0	0	0	0	0	0	0	0	0	0	0	0	0	0	0	0	25	0	0	0	0	0	0	0	0	0	0	0	0	0	0	0	0	0
ERV316A3_10q21.1e	0	0	0	0	0	0	0	0	0	0	0	0	0	0	0	0	0	0	0	0	0	0	0	0	0	0	0	0	0	0	0	16	0	0	0	0	0	0	0	0	0	0	0	0	0	0	0	0	0
ERV316A3_10q21.1f	0	0	0	0	20	0	0	0	0	0	0	0	0	0	0	0	0	0	0	0	0	0	1	0	0	0	0	0	0	0	0	12	0	0	0	0	0	0	0	0	0	0	0	0	0	0	0	0	0
ERV316A3_10q21.1g	0	0	0	0	0	0	0	0	0	0	0	0	0	1	0	0	0	0	0	0	0	0	0	0	0	0	0	0	0	1	0	8	0	0	0	0	0	0	0	2	0	1	0	0	0	0	0	0	0
ERV316A3_10q21.1h	0	0	0	0	0	0	0	0	0	0	0	0	0	0	0	0	0	0	0	0	0	0	0	0	0	0	0	0	0	0	0	2	0	0	0	0	0	0	0	0	0	0	0	0	0	0	0	0	0
ERV316A3_10q21.2a	0	0	0	0	0	0	0	0	0	0	0	0	0	0	0	0	0	0	0	0	0	0	0	0	0	0	0	0	0	0	0	39	0	0	0	0	0	0	0	0	0	0	0	0	1	0	0	0	0
ERV316A3_10q21.2b	0	0	0	0	0	0	0	0	0	0	0	0	0	0	0	0	0	0	0	0	0	0	0	0	0	0	0	0	0	0	0	18	0	0	0	0	0	0	0	0	0	0	0	0	0	0	0	0	0
ERV316A3_10q21.3	0	0	0	0	4	0	0	0	0	0	0	0	0	0	0	0	0	0	0	0	0	0	0	0	0	0	0	0	0	0	0	4	0	0	0	0	0	0	0	0	0	0	0	0	0	0	0	0	0
ERV316A3_10q22.1a	0	1	0	2	36	1	1	1	1	3	0	0	1	0	2	3	0	2	4	0	2	0	2	6	1	0	0	3	2	0	1	60	0	1	0	2	0	3	1	0	6	0	1	0	5	2	0	0	8
ERV316A3_10q22.1b	0	0	0	0	0	0	0	0	0	0	0	0	0	0	0	0	0	0	0	0	0	0	0	0	0	0	0	0	0	0	0	10	0	0	0	0	0	0	0	0	0	0	0	0	0	0	0	0	1
ERV316A3_10q22.3a	0	0	0	0	0	0	0	0	0	0	0	0	0	0	0	0	0	0	0	0	0	0	1	0	0	0	0	0	0	0	0	70	0	0	0	0	0	0	0	0	0	0	0	0	0	0	0	0	0
ERV316A3_10q22.3b	2	0	0	2	2	0	0	0	0	0	0	0	0	1	0	0	0	0	0	0	0	0	1	1	0	0	0	0	1	0	0	48	0	0	1	0	0	1	0	0	0	0	1	0	6	0	0	0	1
ERV316A3_10q22.3c	0	0	0	0	1	0	0	1	1	2	0	0	0	0	0	1	1	0	0	2	7	0	0	0	0	0	1	0	0	0	2	14	0	0	1	0	0	0	0	0	0	0	1	0	0	1	1	0	2
ERV316A3_10q22.3d	0	9	0	0	6	0	0	4	0	12	0	2	0	28	6	0	18	7	0	1	1	0	7	8	13	12	0	15	3	3	11	1	4	0	1	0	0	10	4	1	0	3	2	0	6	3	4	7	6
ERV316A3_10q23.1a	0	0	0	0	0	0	0	0	0	0	0	0	0	0	0	0	0	0	0	0	0	0	1	0	0	0	0	0	0	0	0	24	0	0	0	0	0	0	0	0	0	0	0	0	0	0	0	0	0
ERV316A3_10q23.1b	0	0	0	0	0	0	0	0	0	0	0	0	0	0	0	0	0	0	0	0	0	0	1	0	0	0	0	0	0	0	0	17	0	0	0	0	0	0	0	0	0	0	0	0	0	0	0	0	0
ERV316A3_10q23.2a	0	2	1	0	0	0	4	0	0	4	0	0	0	1	2	0	0	2	0	6	0	0	1	0	0	0	1	0	0	0	1	42	0	0	0	0	0	1	0	0	0	0	0	0	15	0	0	1	0
ERV316A3_10q23.2b	0	0	0	0	0	0	0	0	0	0	0	0	0	2	0	0	2	0	0	0	5	0	0	0	0	0	0	4	13	0	2	1	0	1	0	0	0	0	0	5	0	0	0	0	0	0	0	0	0
ERV316A3_10q23.31a	0	0	0	0	0	0	0	0	0	0	0	0	0	0	0	0	0	1	0	0	0	0	1	0	0	0	0	0	1	0	0	9	0	0	0	0	0	0	0	0	0	0	0	0	0	0	0	0	0
ERV316A3_10q23.31b	3	0	0	0	2	2	0	6	0	1	2	0	1	6	2	0	0	1	5	0	0	0	1	1	0	2	3	0	4	1	4	9	1	2	2	1	0	3	0	2	0	0	1	1	2	0	6	2	0
ERV316A3_10q23.31c	0	0	0	0	0	0	0	0	0	0	0	0	0	0	0	0	0	0	0	0	0	0	0	0	0	0	0	0	0	0	0	25	0	0	0	0	0	0	0	0	0	0	0	0	0	0	0	0	0
ERV316A3_10q23.33	4	0	0	0	1	0	1	0	0	1	0	0	0	1	1	0	0	0	0	0	2	0	1	0	0	0	0	0	0	0	0	14	0	0	0	0	1	0	0	0	3	0	0	0	1	0	0	0	1
ERV316A3_10q24.2	0	0	0	0	0	0	0	0	0	0	0	0	0	0	0	0	0	0	0	0	0	0	0	0	0	0	0	0	0	0	1	23	0	0	0	0	0	0	0	0	0	0	0	0	0	0	0	0	0
ERV316A3_10q25.1a	0	0	0	0	0	0	0	0	0	0	0	0	0	0	0	0	0	0	0	0	0	0	0	0	1	0	0	0	0	0	0	78	0	0	0	0	0	0	0	0	0	0	0	0	0	0	0	0	0
ERV316A3_10q25.1b	0	0	0	0	0	0	0	0	0	0	0	0	0	0	0	0	0	0	0	0	0	0	0	0	0	0	0	0	0	0	0	11	0	0	0	0	0	0	0	0	0	0	0	0	0	0	0	0	0
ERV316A3_10q25.1c	0	0	0	0	0	0	0	0	0	0	0	0	0	0	0	0	0	0	0	0	0	0	0	0	0	0	0	0	0	0	0	7	0	0	0	0	0	0	0	0	0	0	0	0	0	0	0	0	0
ERV316A3_10q25.1d	3	0	0	0	0	0	0	0	0	0	0	0	0	0	0	0	0	0	2	0	0	0	1	0	0	0	0	1	1	0	0	35	12	0	0	0	0	1	0	0	0	0	0	0	2	0	0	0	0
ERV316A3_10q25.1e	0	0	0	0	0	0	0	0	0	0	0	0	0	0	0	0	0	0	0	0	0	0	1	0	0	0	0	1	0	0	0	18	0	0	0	0	0	0	0	0	0	0	0	0	0	0	0	0	0
ERV316A3_10q25.1f	0	0	0	0	0	0	0	0	0	0	0	0	0	0	0	0	0	0	0	0	0	0	2	0	0	0	0	0	0	0	0	55	0	0	0	0	0	0	0	0	0	0	0	0	0	0	0	0	0
ERV316A3_10q25.1g	0	0	0	0	0	0	0	0	0	0	0	0	0	0	0	0	0	0	0	0	0	0	3	0	0	0	0	0	0	0	0	26	0	0	0	0	0	0	0	0	0	0	0	0	0	0	0	0	0
ERV316A3_10q25.1h	0	0	0	0	1	0	0	0	0	0	0	0	0	0	0	1	0	0	0	0	0	0	2	1	0	0	0	0	0	0	2	47	0	0	0	0	0	0	0	1	2	0	0	0	0	0	1	0	0
ERV316A3_10q25.1i	0	0	0	0	0	0	0	0	0	0	0	0	0	0	0	0	0	0	0	0	0	0	0	0	0	0	0	0	0	0	0	14	0	0	0	0	0	0	0	0	0	0	0	0	0	0	0	0	0
ERV316A3_10q25.1j	0	0	0	0	0	0	0	0	0	0	0	0	0	0	0	0	0	0	0	0	0	0	1	0	0	0	0	0	0	0	0	32	0	0	0	0	0	0	0	0	0	0	0	0	0	0	0	0	0
ERV316A3_10q25.1k	1	0	0	0	2	0	0	0	0	0	0	0	0	0	0	0	0	0	0	0	0	0	1	0	0	0	0	0	1	0	1	25	0	0	0	0	0	0	0	1	1	0	2	0	0	0	0	0	0
ERV316A3_10q25.2a	0	0	0	0	0	0	0	0	0	0	0	0	0	0	0	0	0	0	0	0	0	0	0	0	0	0	0	0	0	0	0	4	0	0	0	0	0	0	0	0	0	0	0	0	0	0	0	0	0
ERV316A3_10q25.2b	3	0	0	1	0	0	0	0	0	0	0	0	0	1	0	0	0	0	0	0	0	0	0	0	0	0	2	0	1	2	0	11	0	0	0	0	0	0	0	0	0	0	0	0	1	0	1	0	0
ERV316A3_10q25.3a	0	0	0	0	0	0	0	0	0	0	0	0	0	0	0	0	0	0	0	0	0	0	1	0	0	0	0	0	0	0	0	9	0	0	0	0	0	0	0	0	0	0	0	0	0	0	0	0	0
ERV316A3_10q25.3b	1	0	0	0	0	0	0	0	0	0	0	0	0	2	0	0	0	0	0	1	0	0	1	0	0	0	0	0	0	0	0	28	0	0	1	0	0	0	0	0	0	0	0	0	0	0	0	1	0
ERV316A3_10q25.3c	0	0	0	0	0	0	0	1	0	0	0	0	0	1	0	0	0	0	0	0	0	0	1	0	0	0	0	0	0	0	1	21	0	0	0	0	0	0	0	0	0	0	0	0	0	0	0	0	0
ERV316A3_10q25.3d	0	0	0	0	0	0	0	0	0	0	0	0	0	0	1	1	0	0	0	0	0	0	1	0	0	0	0	0	0	0	0	3	0	0	0	0	0	0	0	0	0	0	0	0	0	0	0	0	0
ERV316A3_10q26.12	0	6	10	66	1	0	0	1	0	1	0	1	0	10	1	0	0	4	1	0	0	9	15	11	1	0	1	0	18	5	0	26	0	12	14	0	0	3	2	9	45	6	1	8	50	15	20	3	35
ERV316A3_10q26.13	0	0	0	0	0	0	0	0	0	0	0	0	0	0	0	0	0	0	0	0	0	0	0	0	0	0	0	0	0	0	0	8	0	0	0	0	0	0	0	0	0	0	0	0	0	0	0	0	0
ERV316A3_10q26.3a	0	0	0	0	0	0	0	0	0	0	0	0	0	0	0	0	0	0	0	0	0	0	0	0	0	0	0	0	0	0	0	14	0	0	0	0	0	0	0	0	0	0	0	0	0	0	0	0	0
ERV316A3_10q26.3b	0	0	0	0	0	0	0	0	0	0	0	0	0	0	0	0	0	0	0	0	0	0	0	0	0	0	0	0	0	0	0	22	0	0	0	0	0	0	0	0	0	0	0	0	0	0	0	0	0
ERV316A3_11p11.2	0	0	0	0	0	0	0	0	0	0	0	0	0	0	0	0	0	0	0	0	0	0	0	0	0	0	0	0	0	0	0	30	0	0	0	0	0	0	0	0	0	0	0	0	0	0	0	0	0
ERV316A3_11p12a	0	0	0	0	0	0	0	0	0	0	0	0	0	0	0	0	0	0	0	0	0	0	1	0	0	0	0	0	0	0	1	13	0	0	0	0	0	0	0	0	0	0	0	0	0	0	0	0	0
ERV316A3_11p12b	0	0	0	0	0	0	0	0	0	0	0	0	0	0	0	0	0	0	0	0	0	0	3	0	0	0	0	0	0	0	0	24	0	0	0	0	0	0	0	0	0	0	0	0	0	0	0	0	0
ERV316A3_11p12c	0	0	0	0	0	0	0	0	0	0	0	0	0	0	0	0	0	0	0	0	0	0	0	0	1	0	0	0	0	0	0	25	0	0	0	0	0	0	0	0	0	0	0	0	0	0	0	0	0
ERV316A3_11p12d	0	0	0	0	0	0	0	0	0	0	0	0	0	0	0	0	0	0	0	0	0	0	0	0	0	0	0	0	0	0	0	7	0	0	0	0	0	0	0	0	0	0	0	0	0	0	0	0	0
ERV316A3_11p12e	0	0	0	0	0	0	0	0	0	0	0	0	0	1	0	0	0	0	0	1	0	0	5	0	0	0	0	0	0	0	0	52	0	0	0	0	0	0	0	0	0	0	0	0	0	0	0	0	0
ERV316A3_11p12f	0	0	0	0	0	0	0	0	0	0	0	0	0	0	0	0	0	0	0	0	0	0	0	0	0	0	0	0	0	0	0	11	0	0	0	0	0	0	0	0	0	0	0	0	0	0	0	0	0
ERV316A3_11p12g	0	0	0	0	0	0	0	0	0	0	0	0	0	0	0	0	0	0	0	0	0	0	0	0	0	0	0	0	0	0	0	47	0	0	0	0	0	0	0	0	0	0	0	0	0	0	0	0	0
ERV316A3_11p13a	0	0	0	0	1	0	0	0	0	1	0	0	0	0	0	0	0	0	0	0	0	0	0	0	0	0	0	0	0	1	0	7	0	0	0	0	1	0	0	0	0	0	0	0	0	0	0	0	0
ERV316A3_11p13b	0	1	0	0	0	0	0	1	0	2	0	3	0	0	0	0	0	2	1	0	0	0	1	1	0	0	0	0	0	3	7	34	1	0	0	0	0	0	0	0	1	0	1	1	0	0	0	0	1
ERV316A3_11p13c	0	0	0	1	1	0	0	10	0	2	0	5	2	5	0	0	0	0	2	3	2	0	0	4	1	0	0	18	0	4	54	40	1	0	0	0	0	1	0	0	2	0	3	3	5	5	1	1	2
ERV316A3_11p13d	0	1	0	0	0	0	0	1	1	0	0	0	0	0	0	0	1	0	0	0	0	0	1	0	0	0	0	0	0	1	0	11	0	0	0	0	5	0	0	1	0	0	0	1	1	0	0	0	0
ERV316A3_11p14.1a	0	0	0	0	0	0	0	0	0	0	0	0	0	0	0	0	0	0	0	0	0	0	0	0	0	0	0	0	0	0	0	11	0	0	0	0	0	0	0	0	0	0	0	0	0	0	0	0	0
ERV316A3_11p14.1b	0	0	0	0	0	0	0	0	0	0	0	0	0	0	0	0	0	0	0	0	0	0	1	0	0	0	0	0	0	0	0	14	0	0	0	0	0	0	0	0	0	0	0	0	0	0	0	0	0
ERV316A3_11p14.1c	0	0	0	0	0	0	0	0	0	0	0	0	0	0	0	0	0	0	0	0	0	0	1	0	0	0	0	0	0	0	0	17	0	0	0	0	0	0	0	0	0	0	0	0	0	0	0	0	0
ERV316A3_11p14.2	0	0	0	2	0	0	0	0	0	0	0	0	0	0	0	0	0	0	0	0	0	0	2	0	0	0	0	0	0	0	0	20	0	0	0	0	0	0	0	0	0	0	0	0	0	0	0	1	0
ERV316A3_11p14.3a	0	0	0	0	0	0	0	0	0	0	0	0	0	0	0	0	0	0	0	0	0	0	0	0	0	0	0	0	0	0	0	10	1	0	0	0	0	0	0	0	0	0	0	0	0	0	0	0	0
ERV316A3_11p14.3b	0	0	0	0	0	0	0	0	0	0	0	0	0	0	0	0	0	0	0	0	0	0	1	0	0	0	0	0	0	0	0	16	0	0	0	0	0	0	0	0	0	0	0	0	0	0	0	0	0
ERV316A3_11p14.3c	0	0	0	0	0	0	0	0	0	0	0	0	0	0	0	0	0	0	0	0	0	0	2	0	0	0	0	0	0	0	0	18	0	0	0	0	0	0	0	0	0	0	0	0	0	0	0	0	0
ERV316A3_11p14.3d	0	0	0	0	0	0	0	0	0	0	0	0	0	0	0	0	0	0	0	0	0	0	0	0	0	0	0	0	0	0	0	4	0	0	0	0	0	0	0	0	0	0	0	0	0	0	0	0	0
ERV316A3_11p14.3e	0	0	0	0	0	0	0	0	0	0	0	0	0	0	0	0	0	0	0	0	0	0	1	0	0	0	0	0	0	0	0	39	0	0	0	0	0	0	0	0	0	0	0	0	0	0	0	0	0
ERV316A3_11p14.3f	0	0	0	0	0	0	1	0	0	0	0	0	0	0	0	0	0	0	0	0	1	0	0	0	0	0	0	0	0	0	0	12	0	0	0	0	0	0	0	0	0	0	0	0	0	0	0	0	0
ERV316A3_11p14.3g	0	0	0	0	0	0	0	0	0	0	0	0	0	2	0	0	0	0	0	0	0	0	0	0	0	0	0	0	0	0	0	13	0	0	0	0	0	0	0	0	0	0	0	0	0	0	0	0	0
ERV316A3_11p14.3h	0	0	0	0	0	0	0	0	0	0	0	0	0	0	0	0	0	0	0	0	0	0	0	0	0	0	0	0	0	0	0	8	1	0	0	0	0	0	0	0	0	0	0	0	0	0	0	0	0
ERV316A3_11p15.1	0	0	0	0	0	0	0	0	0	0	0	0	0	0	0	0	0	0	0	0	0	0	0	0	0	0	0	0	0	0	0	10	3	0	0	0	0	0	0	0	0	0	0	0	0	0	0	0	0
ERV316A3_11p15.2a	0	1	0	0	0	0	0	0	0	0	0	0	2	0	0	0	1	0	0	0	0	0	0	0	0	0	0	1	1	1	0	30	0	0	0	0	0	0	0	0	0	1	1	0	0	0	0	0	0
ERV316A3_11p15.2b	0	0	0	0	0	0	0	0	0	0	0	0	0	1	0	0	0	0	0	0	0	0	0	0	0	0	0	0	0	0	0	13	0	0	0	0	0	0	0	0	0	0	0	0	0	0	0	0	0
ERV316A3_11p15.3	0	0	0	0	0	0	0	0	0	1	0	0	0	16	4	0	1	1	2	2	0	0	1	0	1	2	1	2	8	1	0	12	8	0	3	0	0	1	0	0	1	1	1	0	0	0	2	2	0
ERV316A3_11p15.4a	3	3	0	0	0	0	1	1	0	0	0	0	0	1	0	0	1	3	2	0	1	0	3	0	0	0	0	0	0	2	1	7	0	0	1	0	1	0	5	0	1	1	3	0	1	0	0	2	0
ERV316A3_11p15.4b	0	0	0	0	0	0	0	0	0	0	0	0	0	0	0	0	0	0	0	0	0	0	0	0	0	0	0	0	0	0	0	4	0	0	0	0	0	0	0	0	0	0	0	0	1	0	0	0	0
ERV316A3_11p15.4c	0	0	0	0	0	0	0	0	0	0	0	0	0	0	0	0	0	0	0	0	0	0	2	0	0	0	0	0	0	0	0	40	0	0	0	0	0	0	0	0	0	0	0	0	0	0	0	0	0
ERV316A3_11p15.4d	0	0	0	0	0	0	0	0	0	0	0	0	0	0	0	0	0	0	1	0	0	0	0	0	0	0	0	0	0	0	0	4	0	0	0	0	0	0	0	0	0	0	0	0	0	0	0	0	0
ERV316A3_11p15.4e	0	0	0	0	0	0	0	0	0	0	0	0	0	0	0	0	0	1	0	0	0	0	1	0	0	0	0	0	0	0	0	29	0	0	0	0	0	0	0	0	0	0	0	0	0	0	0	0	0
ERV316A3_11p15.4f	0	0	0	0	0	0	0	0	0	0	0	0	0	0	0	0	0	0	0	0	0	0	0	0	0	0	0	0	0	0	0	6	0	0	0	0	0	0	0	0	0	0	0	0	0	0	0	0	0
ERV316A3_11p15.4g	0	0	0	0	0	1	0	0	0	0	0	0	0	5	0	0	0	0	0	0	0	0	0	0	0	0	0	0	1	0	0	13	0	0	0	0	0	0	0	0	0	1	0	0	0	0	0	0	1
ERV316A3_11p15.4h	0	0	0	0	0	0	0	0	0	0	0	0	0	0	0	0	0	0	0	0	0	0	0	0	0	0	0	0	0	0	0	11	2	0	0	0	0	0	0	0	0	0	0	0	0	0	0	0	0
ERV316A3_11p15.4i	0	0	0	0	1	0	0	0	0	0	0	0	0	0	0	0	0	0	0	0	2	0	1	0	0	0	0	0	0	0	0	26	0	0	0	1	1	1	0	0	0	0	0	0	0	0	0	0	0
ERV316A3_11p15.4j	0	0	0	0	0	1	0	0	0	2	0	0	0	0	0	0	0	0	0	0	0	0	0	0	0	0	0	0	0	0	0	20	0	0	0	0	0	0	0	0	0	0	0	0	0	1	0	0	0
ERV316A3_11p15.4k	1	0	4	1	0	1	0	0	1	1	0	0	0	10	1	0	0	3	2	1	0	1	1	0	2	1	0	0	2	1	3	10	0	0	0	0	0	1	2	0	0	0	0	0	1	0	1	0	1
ERV316A3_11p15.5a	0	0	0	0	8	0	0	3	0	0	0	0	0	0	0	1	0	0	0	0	0	0	0	0	0	0	0	4	1	4	0	8	1	1	0	0	0	1	1	0	0	0	0	0	1	0	0	0	0
ERV316A3_11p15.5b	0	0	0	0	0	0	0	0	0	0	0	0	0	0	0	0	0	0	0	0	0	0	0	0	0	1	0	0	0	0	0	12	0	0	0	0	0	0	0	0	0	0	1	0	1	0	0	0	0
ERV316A3_11q11	0	0	0	0	0	0	0	0	0	0	0	0	0	0	0	0	0	0	0	0	0	0	0	0	0	0	0	0	0	0	0	0	0	0	0	0	0	0	0	0	0	0	0	0	0	0	0	0	0
ERV316A3_11q12.1a	0	0	2	4	0	0	0	0	0	0	0	0	0	2	0	0	0	1	0	0	5	1	2	1	1	0	2	0	0	1	0	20	0	1	0	0	0	1	0	2	2	9	0	0	3	0	2	3	6
ERV316A3_11q12.1b	0	0	0	0	0	0	0	0	0	0	0	0	0	0	0	0	0	0	0	0	0	0	0	0	0	0	0	0	0	0	0	18	1	0	0	0	0	0	0	0	0	0	1	0	1	0	0	0	0
ERV316A3_11q12.3	2	0	0	0	7	0	0	3	0	9	0	2	0	4	0	0	0	3	2	0	0	1	1	1	0	0	0	4	10	9	3	17	3	0	0	1	0	0	0	1	0	0	2	1	2	0	5	1	0
ERV316A3_11q13.1a	0	0	5	7	8	2	1	1	6	3	2	9	0	0	2	3	4	1	6	4	14	2	5	10	3	0	3	12	5	4	30	12	17	2	32	1	2	11	0	18	2	3	4	7	27	5	6	4	7
ERV316A3_11q13.1b	0	1	2	4	9	2	0	2	2	1	0	6	1	1	2	4	2	3	3	1	4	3	5	7	3	1	1	3	0	7	16	73	11	2	26	1	0	5	0	7	4	4	1	3	11	1	2	2	5
ERV316A3_11q13.2	0	0	0	0	2	0	0	3	0	0	0	0	0	1	0	0	0	0	0	0	0	0	0	0	2	0	0	0	0	2	1	4	0	0	0	0	0	1	0	0	0	0	0	5	3	0	0	0	0
ERV316A3_11q13.3	89	30	65	20	42442	19	154	307	40	490	14	375	0	29	40	1	43	7	3	71	2	0	11	12	22	123	0	188	83	25	532	388	2	27	216	5	24	133	2	1	156	2	899	11	158	48	2	1737	25
ERV316A3_11q13.4a	0	0	0	0	0	0	0	0	0	0	0	0	0	0	0	0	0	0	0	0	0	0	0	0	0	0	0	0	0	0	0	1	0	0	0	0	0	0	0	0	0	0	0	0	0	0	0	0	0
ERV316A3_11q13.4b	0	0	0	0	0	0	0	0	0	0	0	0	0	0	0	0	1	0	0	2	0	0	0	0	0	0	1	0	0	0	0	34	0	0	0	0	0	0	0	0	0	0	0	0	0	0	0	0	0
ERV316A3_11q14.1a	0	0	0	0	0	0	0	0	0	0	0	0	0	10	0	0	0	0	0	0	0	0	0	0	1	0	0	0	0	0	0	16	3	0	0	0	0	0	0	0	0	0	0	0	0	0	0	0	0
ERV316A3_11q14.1b	0	0	0	0	0	0	0	0	0	0	0	0	0	0	0	0	0	0	0	0	0	0	0	0	0	0	0	0	0	0	0	16	0	0	0	0	0	0	0	0	0	0	0	0	0	0	0	0	0
ERV316A3_11q14.3a	0	0	0	0	0	0	0	1	0	0	0	0	0	0	0	0	0	0	0	0	0	0	0	0	0	0	0	0	0	0	0	10	0	0	0	0	0	1	0	0	0	0	0	0	0	0	0	0	0
ERV316A3_11q14.3b	0	0	0	0	0	0	0	0	0	0	0	0	0	0	0	0	0	0	0	0	0	0	0	0	0	0	0	0	0	0	0	7	0	0	0	0	0	0	0	0	0	0	0	0	0	0	0	0	0
ERV316A3_11q14.3c	0	0	0	0	0	0	0	0	0	0	0	0	0	0	0	0	0	0	0	0	0	0	0	0	0	0	0	0	0	0	0	21	0	0	0	0	0	0	0	0	0	0	0	0	0	0	0	0	1
ERV316A3_11q14.3d	0	0	0	0	1	0	0	0	0	0	0	0	0	0	0	0	0	0	0	0	0	0	0	0	0	0	0	0	0	0	0	18	0	0	0	0	0	0	0	0	0	0	0	0	0	0	0	1	0
ERV316A3_11q14.3e	0	0	0	0	0	0	0	0	0	0	0	0	0	0	0	0	0	0	0	0	0	0	0	0	0	0	0	0	0	0	0	8	1	0	0	0	0	0	0	0	0	0	0	0	0	0	0	0	0
ERV316A3_11q21a	0	0	0	0	0	0	0	0	0	0	0	0	0	1	0	0	0	0	0	0	0	1	0	0	0	0	0	1	0	0	1	12	0	1	0	0	0	0	0	0	0	0	0	0	2	0	1	0	0
ERV316A3_11q21b	0	0	0	0	0	0	2	0	0	0	0	0	0	0	0	0	0	0	0	0	0	0	0	0	0	0	0	0	0	0	0	3	0	0	0	0	0	0	0	0	0	0	0	1	0	0	0	0	0
ERV316A3_11q21c	0	0	0	0	0	0	0	0	0	0	0	0	0	0	0	0	0	0	0	0	0	2	1	0	0	0	0	0	0	0	0	44	0	1	0	0	0	0	0	0	0	0	0	3	0	0	0	0	0
ERV316A3_11q21d	0	0	0	0	0	0	0	0	0	0	0	0	0	0	0	0	0	0	0	0	0	0	0	0	0	0	0	0	0	0	0	14	0	0	0	0	0	0	0	0	0	0	0	0	0	0	0	0	0
ERV316A3_11q21e	0	0	0	0	0	0	0	0	0	0	0	0	0	0	0	0	0	0	0	0	0	0	0	0	0	0	0	0	0	0	0	11	0	0	0	0	0	0	0	0	0	0	0	0	0	0	0	0	0
ERV316A3_11q22.1a	0	0	0	0	0	0	0	0	0	0	0	0	0	0	0	0	0	0	0	0	0	0	0	0	0	0	0	0	0	0	0	12	0	0	0	0	0	0	0	0	0	0	0	0	0	0	0	0	0
ERV316A3_11q22.1b	0	0	0	0	0	0	0	0	0	0	0	0	0	0	0	0	0	0	0	0	0	0	1	0	0	0	0	0	0	0	0	25	0	0	0	0	0	0	0	0	0	0	0	0	0	0	0	1	0
ERV316A3_11q22.1c	0	0	0	0	0	0	0	0	0	0	0	0	0	0	0	0	0	0	0	0	0	0	0	0	0	0	0	0	0	0	0	22	0	0	0	0	0	0	0	0	0	0	0	0	0	0	0	0	0
ERV316A3_11q22.1d	0	0	0	0	0	0	0	0	0	0	0	0	0	0	0	0	0	0	0	0	0	0	0	0	0	0	0	0	0	0	0	7	0	0	0	0	0	0	0	0	0	0	0	0	0	0	0	0	0
ERV316A3_11q22.1e	0	0	0	0	0	0	0	0	0	0	0	0	0	0	0	0	0	0	0	0	0	0	2	0	0	0	0	0	0	0	0	49	0	0	0	0	0	0	0	0	0	0	0	0	0	0	0	0	0
ERV316A3_11q22.1f	0	0	0	0	0	0	0	0	0	0	0	0	0	0	0	0	0	0	0	0	0	0	0	0	0	0	0	0	0	0	0	27	0	0	0	0	0	0	0	0	0	0	0	0	0	0	0	0	0
ERV316A3_11q22.1g	0	0	0	0	2	0	9	0	0	0	0	0	0	14	0	0	0	0	0	0	0	0	3	1	3	0	0	5	2	0	12	15	0	0	0	0	0	0	0	0	0	0	0	0	0	0	0	0	0
ERV316A3_11q22.1h	0	0	0	1	0	0	0	0	0	0	0	0	0	0	0	0	0	0	0	0	0	0	0	0	0	0	0	0	0	0	0	13	0	0	0	0	0	0	0	0	0	0	0	0	0	0	0	0	0
ERV316A3_11q22.1i	0	0	0	2	0	0	0	0	0	0	0	0	0	0	0	0	0	0	0	0	0	0	0	0	0	0	0	0	0	0	0	31	0	0	0	0	0	0	0	0	0	0	0	0	0	0	0	0	0
ERV316A3_11q22.1j	0	0	0	2	0	0	0	0	0	0	0	0	0	0	0	0	0	0	0	0	0	0	0	0	1	0	0	0	0	0	0	9	0	0	0	0	0	0	0	0	0	0	0	0	0	0	0	0	0
ERV316A3_11q22.1k	0	0	0	0	0	0	0	0	0	0	0	1	0	0	0	0	0	0	0	0	0	0	0	0	0	0	0	0	1	0	0	30	0	1	0	0	0	0	0	0	0	0	0	0	0	0	0	0	0
ERV316A3_11q22.1l	3	0	0	0	0	0	0	0	0	0	0	0	0	0	0	0	0	0	0	0	0	0	0	0	0	0	0	0	0	0	0	21	0	0	0	0	0	0	0	1	0	0	0	0	1	0	0	0	0
ERV316A3_11q22.1m	0	0	0	0	1	0	3	0	0	3	0	1	0	5	0	0	3	0	6	0	2	0	0	2	1	0	0	2	2	2	2	13	2	1	4	0	2	0	0	1	0	0	1	0	4	0	3	1	0
ERV316A3_11q22.2	0	0	0	0	0	0	0	0	0	0	0	0	0	0	0	0	0	0	0	0	0	0	0	0	0	0	0	0	0	0	0	2	0	0	0	0	0	0	0	0	0	0	0	0	0	0	0	0	0
ERV316A3_11q22.3a	0	0	0	0	0	0	0	0	0	0	0	0	0	0	0	0	0	0	0	0	0	0	1	0	0	0	0	0	0	0	0	21	0	0	0	0	0	0	0	0	0	0	0	0	0	0	0	0	0
ERV316A3_11q22.3b	0	0	0	0	0	0	0	0	0	0	0	0	0	1	0	0	0	0	0	0	0	0	0	0	0	0	0	0	0	0	0	18	1	0	0	0	0	0	0	0	0	0	0	0	1	0	0	0	0
ERV316A3_11q22.3c	0	0	0	0	0	0	0	0	0	0	0	0	0	0	0	0	0	0	0	0	0	0	0	0	0	0	0	0	1	0	0	9	2	0	0	1	0	0	0	0	0	0	0	0	0	0	0	1	0
ERV316A3_11q22.3d	0	0	0	0	0	0	0	0	0	0	0	0	0	1	0	0	0	0	0	0	0	0	1	0	0	0	0	0	0	0	0	27	0	0	0	0	0	0	0	0	0	0	0	0	0	0	0	0	0
ERV316A3_11q22.3e	0	0	0	0	0	0	0	0	0	0	0	0	0	0	0	0	0	0	0	0	0	1	0	0	0	0	0	0	0	0	0	13	0	0	0	0	0	1	1	0	0	0	0	0	0	0	0	0	0
ERV316A3_11q23.1a	0	0	0	0	0	0	0	0	0	0	0	0	0	0	0	0	0	0	0	0	0	0	1	0	0	0	0	0	0	0	0	26	0	0	0	0	0	0	0	0	0	0	0	0	0	0	0	0	0
ERV316A3_11q23.1b	0	0	0	0	0	0	0	0	0	0	0	0	0	0	0	0	0	0	0	0	0	0	0	0	0	0	0	0	0	0	0	13	0	0	0	0	0	0	0	0	0	0	0	0	0	0	0	0	0
ERV316A3_11q23.1c	0	0	0	0	0	0	0	0	0	0	0	0	0	0	0	0	0	0	0	0	0	0	0	0	0	0	0	0	0	0	0	9	0	0	0	0	0	0	0	0	0	0	0	0	0	0	0	0	0
ERV316A3_11q23.1d	3	12	12	2	3	7	4	2	3	4	1	3	0	27	4	0	10	2	3	6	2	18	3	2	35	1	1	9	1	9	4	33	10	1	1	0	4	2	65	9	0	2	2	1	7	1	9	2	1
ERV316A3_11q23.2	0	0	0	3	0	0	0	0	0	0	0	0	0	0	0	0	0	0	0	0	0	0	0	0	0	0	0	0	0	2	2	11	2	0	1	0	0	0	0	0	0	0	0	0	0	0	2	0	0
ERV316A3_11q23.3a	0	0	0	0	0	0	0	0	0	0	0	0	0	0	0	0	0	0	0	0	0	0	0	0	0	0	0	0	0	0	0	15	0	0	0	0	0	0	0	0	0	0	0	0	0	0	0	0	0
ERV316A3_11q23.3b	0	0	0	1	0	0	0	0	0	0	0	0	0	0	0	0	0	0	0	0	0	0	0	0	0	0	0	0	0	0	0	9	0	0	0	0	0	0	0	0	0	0	0	0	1	0	1	0	0
ERV316A3_11q23.3c	0	0	0	1	1	0	0	0	0	0	0	0	0	0	1	0	0	0	1	0	0	0	3	2	0	0	2	0	0	4	0	69	0	0	0	0	0	0	0	0	0	0	0	0	0	0	34	11	0
ERV316A3_11q23.3d	0	0	1	2	3	0	1	1	0	0	0	1	0	1	1	0	0	1	0	0	0	0	0	2	0	1	0	0	3	1	0	32	0	0	5	0	1	0	1	0	3	1	0	1	5	1	9	3	0
ERV316A3_11q23.3e	0	3	0	0	7	0	12	1	0	45	0	0	3	1	0	0	2	3	0	0	0	0	0	0	0	0	0	2	0	45	1	73	0	1	0	0	0	0	0	0	0	4	92	0	5	0	0	0	1
ERV316A3_11q23.3f	0	0	0	0	0	0	1	1	0	1	0	0	0	2	0	0	1	0	0	2	0	0	3	2	1	0	0	2	2	0	0	38	1	0	0	0	1	0	0	2	0	1	2	0	2	0	0	4	4
ERV316A3_11q24.1	0	0	0	0	0	0	0	0	0	0	0	0	0	2	0	0	0	0	0	0	0	0	2	0	0	0	0	0	0	1	0	37	0	0	0	0	1	0	1	0	0	0	0	0	1	0	0	0	1
ERV316A3_11q24.2	0	1	0	0	0	0	0	2	0	0	1	0	0	2	0	0	0	0	0	0	0	0	0	0	0	0	0	0	2	0	0	33	1	0	0	0	0	0	0	0	0	2	0	0	2	0	0	0	0
ERV316A3_11q24.3a	0	0	0	0	0	0	0	0	0	0	0	0	0	0	0	0	0	0	0	0	0	0	0	0	0	0	0	0	0	0	0	16	0	0	0	0	0	0	0	0	0	0	0	0	0	0	0	0	1
ERV316A3_11q24.3b	0	0	0	0	0	0	0	0	0	0	0	0	0	0	0	0	0	0	0	0	0	0	0	0	0	0	0	0	0	0	0	7	0	0	0	0	0	0	0	0	0	0	0	0	0	0	0	0	0
ERV316A3_11q25a	0	0	0	0	0	0	0	1	0	0	0	0	0	0	0	0	0	0	0	0	0	0	0	0	0	0	0	0	0	0	0	28	0	0	0	0	0	0	0	0	0	0	0	0	0	0	0	1	0
ERV316A3_11q25b	0	0	0	0	0	0	0	0	0	0	0	0	0	0	0	0	0	0	0	0	0	0	1	0	0	0	0	0	0	0	1	18	0	0	0	0	0	0	0	0	0	0	0	0	0	0	0	0	0
ERV316A3_11q25c	0	0	0	0	0	0	0	0	0	0	0	0	0	0	0	0	0	0	0	0	0	0	0	0	0	0	0	0	0	0	0	8	0	0	0	0	0	0	0	0	0	0	0	0	0	0	0	0	0
ERV316A3_11q25d	0	0	0	0	0	0	0	0	0	0	0	0	0	0	0	0	0	0	0	0	0	0	0	0	0	0	0	0	0	1	1	23	0	0	0	0	0	0	0	0	0	0	0	0	0	0	0	0	0
ERV316A3_11q25e	0	0	0	0	0	0	0	0	0	0	0	0	0	0	0	0	0	0	0	0	0	0	0	0	0	0	0	0	0	0	0	17	0	0	0	0	0	0	0	0	0	0	0	0	0	0	0	0	0
ERV316A3_11q25f	0	0	0	0	0	0	0	0	0	0	0	0	0	0	0	0	0	0	0	0	0	0	0	0	0	0	0	0	0	0	0	12	0	0	0	0	0	0	0	0	0	0	0	0	0	0	0	0	0
ERV316A3_12p11.22a	0	5	4	1	2	8	4	5	1	2	0	3	1	34	3	2	3	2	5	4	4	6	6	5	3	5	3	10	13	23	16	24	12	0	7	0	38	6	5	4	4	3	10	12	7	0	9	8	1
ERV316A3_12p11.22b	0	0	0	0	0	0	0	0	0	0	0	0	0	0	0	0	0	0	0	0	2	0	0	0	0	0	0	0	0	1	0	10	0	0	0	0	0	0	0	0	0	0	0	0	0	0	0	0	0
ERV316A3_12p11.22c	0	0	0	0	0	0	0	0	0	0	0	0	0	0	0	0	0	0	0	0	0	0	1	0	0	0	0	0	0	0	0	45	0	0	0	0	0	0	0	0	0	0	0	0	0	0	0	0	0
ERV316A3_12p11.22d	0	0	0	0	0	0	0	0	0	0	0	0	0	0	0	0	0	0	0	0	0	0	1	0	0	0	0	0	0	0	0	34	1	0	0	0	0	0	0	0	0	0	0	1	0	0	0	0	0
ERV316A3_12p11.23a	0	2	0	0	2	0	2	3	0	2	0	1	0	11	0	0	0	4	6	2	3	3	0	1	1	1	2	1	7	0	3	8	0	0	3	2	10	2	5	0	3	0	5	0	8	0	5	5	0
ERV316A3_12p11.23b	0	3	1	1	4	3	2	0	4	6	0	2	2	24	1	0	2	1	10	9	6	1	6	3	6	0	2	5	17	14	4	5	4	3	9	0	25	1	0	3	5	1	13	4	7	0	4	8	5
ERV316A3_12p11.23c	0	0	0	0	1	0	0	0	0	0	0	0	0	0	0	0	0	0	0	0	0	0	0	0	0	0	0	0	0	1	0	15	0	0	0	0	0	0	0	0	0	0	0	0	0	0	0	0	0
ERV316A3_12p12.1a	0	0	0	0	1	0	0	0	0	0	0	0	0	2	0	0	0	2	0	0	0	0	0	0	0	0	0	0	0	0	0	13	0	0	0	0	1	0	0	0	0	1	0	0	0	0	1	0	0
ERV316A3_12p12.1b	0	0	0	0	0	0	0	0	0	0	0	0	0	0	0	0	0	0	0	0	0	0	3	0	0	0	0	0	0	0	0	32	0	0	0	0	0	0	0	0	0	0	0	0	0	0	0	0	0
ERV316A3_12p12.1c	0	0	0	0	0	0	0	0	0	1	0	0	0	0	0	0	0	0	0	0	0	0	0	0	0	0	0	0	0	0	0	17	1	0	0	0	0	1	0	0	1	0	1	0	0	0	0	0	0
ERV316A3_12p12.2a	0	0	1	0	0	0	0	0	0	0	0	0	0	0	0	0	0	0	0	0	0	0	0	0	0	0	0	0	0	0	0	11	1	0	0	1	0	1	0	0	0	5	0	0	0	1	0	0	0
ERV316A3_12p12.2b	0	0	0	0	0	0	0	0	0	0	0	0	0	1	0	0	0	0	0	0	0	0	1	0	0	0	0	0	0	0	0	5	0	0	0	0	0	0	0	0	0	0	0	0	1	0	0	0	0
ERV316A3_12p12.3a	0	0	0	1	0	0	1	0	0	0	0	0	0	0	1	1	0	0	0	0	0	0	3	2	0	0	1	0	0	1	2	6	0	2	0	0	0	1	0	1	3	0	1	0	1	0	1	2	27
ERV316A3_12p12.3b	0	0	2	1	0	0	1	1	0	0	0	0	0	6	0	0	3	0	4	1	0	3	2	0	0	0	0	2	3	0	1	26	1	1	0	0	0	0	2	0	1	1	0	0	1	0	1	2	1
ERV316A3_12p12.3c	1	2	1	0	6	1	9	15	5	0	3	0	4	30	4	1	9	2	7	8	1	7	4	1	5	5	0	16	4	6	5	30	6	3	2	1	2	13	11	2	5	2	3	1	5	13	2	9	8
ERV316A3_12p12.3d	0	0	0	0	0	0	0	0	0	0	0	0	0	0	0	0	0	0	0	0	0	0	0	0	0	0	0	0	0	1	0	7	0	0	0	0	0	0	0	0	0	0	0	0	0	0	0	0	0
ERV316A3_12p12.3e	0	0	0	1	0	0	0	0	0	0	0	0	0	0	0	0	0	0	0	0	0	0	1	0	0	0	0	0	0	1	0	24	3	0	0	0	0	0	0	0	0	0	0	0	0	0	0	0	0
ERV316A3_12p12.3f	1	0	0	0	1	0	0	0	0	1	0	0	0	2	0	0	0	0	0	0	0	0	0	0	2	0	0	2	3	0	1	51	1	0	0	0	0	0	0	0	1	0	0	0	0	0	2	0	0
ERV316A3_12p13.1	1	0	0	0	0	0	0	0	0	0	0	0	0	0	0	0	0	0	0	0	0	0	0	0	0	0	0	0	0	1	0	35	0	0	1	0	0	0	0	0	0	0	0	2	0	0	0	0	0
ERV316A3_12p13.33	0	7	1	7	6	6	6	3	2	10	0	2	2	24	4	2	14	10	14	5	15	2	5	5	2	2	4	2	15	11	4	7	5	2	9	4	7	2	10	0	7	3	3	2	7	0	4	6	4
ERV316A3_12q12a	0	0	0	0	0	0	0	0	0	0	0	0	0	0	0	0	0	0	0	0	0	0	0	0	0	0	0	0	0	0	0	8	0	0	0	0	0	0	0	0	0	0	0	0	0	0	0	0	0
ERV316A3_12q12b	0	0	0	0	0	0	0	0	0	0	0	0	0	0	0	0	1	0	0	0	0	0	0	0	0	0	0	0	0	0	0	45	0	0	0	0	0	0	0	0	0	0	0	0	0	0	0	0	0
ERV316A3_12q12c	2	0	0	0	0	0	0	0	0	0	0	0	0	0	0	0	0	0	0	0	0	0	0	0	0	0	0	0	0	0	0	16	0	0	0	0	0	0	0	0	0	0	0	0	0	0	0	0	0
ERV316A3_12q12d	0	0	0	0	0	0	0	0	0	0	0	0	0	0	0	0	0	0	0	0	0	0	0	0	0	0	0	0	0	0	0	31	0	0	0	0	0	0	0	0	0	0	0	0	0	0	0	0	0
ERV316A3_12q12e	0	0	0	2	0	0	0	0	0	0	0	0	0	0	0	0	0	0	0	0	0	0	0	0	0	0	0	0	0	0	0	18	0	0	0	0	0	0	1	0	0	0	1	0	0	0	0	1	0
ERV316A3_12q13.11a	0	0	0	0	0	0	0	0	0	0	0	0	0	0	0	0	0	0	0	0	0	0	0	0	0	0	0	1	0	0	0	36	0	0	0	0	0	0	0	0	0	2	0	0	1	0	0	0	0
ERV316A3_12q13.11b	0	1	0	0	0	0	0	0	0	0	0	0	0	0	0	0	0	0	0	0	0	0	0	0	0	0	0	0	0	2	0	11	1	0	0	0	0	0	0	0	0	0	0	0	0	0	0	0	0
ERV316A3_12q13.13	0	0	0	0	1	0	1	0	0	0	0	0	0	0	0	0	2	0	0	0	0	0	5	0	0	1	0	1	0	3	0	36	0	0	0	0	0	0	0	0	2	1	0	0	1	1	0	2	0
ERV316A3_12q14.1a	0	0	0	0	0	0	0	0	0	0	0	4	0	0	0	0	0	0	0	0	0	0	1	0	0	0	0	0	0	0	0	17	0	0	0	0	0	0	0	0	0	0	0	0	0	0	0	0	0
ERV316A3_12q14.1b	0	0	0	0	0	0	0	0	0	0	0	0	0	0	0	0	0	0	0	0	0	0	0	0	0	0	0	0	0	0	0	26	0	0	0	0	0	0	0	0	0	0	0	0	0	0	0	0	0
ERV316A3_12q14.1c	0	0	0	0	0	0	0	0	0	0	0	0	0	0	0	0	0	0	0	0	1	0	0	0	0	0	0	0	0	0	0	16	0	0	0	0	0	0	0	0	0	0	0	0	0	0	0	0	0
ERV316A3_12q14.1d	0	0	0	0	0	0	0	0	0	0	0	0	0	0	0	0	0	0	0	0	0	0	0	0	0	0	0	0	0	0	0	17	0	0	1	0	0	0	0	0	1	0	0	0	0	0	1	0	0
ERV316A3_12q14.1e	0	0	3	0	3	2	7	4	1	1	0	6	0	1	1	0	4	9	9	0	4	3	11	5	3	4	1	8	3	19	12	16	9	2	3	5	0	0	1	2	4	0	4	5	6	1	3	5	0
ERV316A3_12q14.2	0	0	1	0	0	0	0	1	0	0	0	0	0	0	0	0	0	0	0	0	4	0	1	0	0	0	0	0	0	0	0	36	0	0	0	1	0	0	0	0	0	0	0	0	0	0	0	0	0
ERV316A3_12q14.3a	2	0	0	0	0	0	0	0	0	0	0	0	0	0	0	0	0	0	0	0	1	1	0	0	0	0	0	0	1	0	1	3	0	0	0	0	0	0	0	0	1	0	0	0	0	0	0	1	0
ERV316A3_12q14.3b	0	0	0	0	0	0	0	0	0	0	0	0	0	0	0	0	0	0	0	0	0	0	2	0	0	1	0	0	0	0	2	9	0	0	0	0	0	0	0	0	0	0	0	0	0	0	0	0	1
ERV316A3_12q21.1	1	0	0	6	2	0	0	3	0	0	0	0	0	18	0	0	0	0	0	10	22	2	2	0	2	0	0	4	6	6	7	39	0	0	1	0	0	6	0	0	13	2	0	0	5	3	2	4	0
ERV316A3_12q21.2	0	0	0	1	0	0	0	0	0	0	0	0	0	0	0	0	0	0	0	1	3	0	1	0	0	0	0	1	0	0	0	41	0	0	0	0	0	0	0	0	0	2	0	0	2	0	0	0	1
ERV316A3_12q21.31a	0	0	0	0	0	0	0	0	0	0	0	0	0	0	0	0	0	0	0	0	0	0	0	0	0	0	0	0	0	0	0	9	0	0	0	0	0	0	0	0	0	0	0	0	0	0	0	0	0
ERV316A3_12q21.31b	0	0	0	0	0	0	0	0	0	0	0	0	0	0	0	0	0	0	0	0	0	0	0	0	0	0	0	0	0	0	0	23	1	0	0	0	0	0	4	0	0	0	0	0	0	0	0	3	0
ERV316A3_12q21.31c	0	0	0	0	0	0	0	0	0	0	0	0	0	0	0	0	0	0	0	0	0	0	1	0	3	0	0	0	0	3	1	32	1	0	0	0	1	1	0	0	0	0	1	0	0	0	0	1	0
ERV316A3_12q21.31d	0	0	0	0	0	0	0	0	0	0	0	0	0	0	0	0	0	0	0	0	0	0	0	0	0	0	0	0	0	0	0	17	0	0	0	0	0	0	0	0	0	0	0	0	0	0	0	0	0
ERV316A3_12q21.31e	0	0	0	0	0	0	0	0	0	0	0	0	0	0	0	0	0	0	0	0	0	0	0	0	0	0	0	0	0	0	0	13	0	0	0	0	0	0	0	0	0	0	0	0	0	0	0	0	0
ERV316A3_12q21.31f	0	0	0	0	0	0	0	0	0	0	0	0	0	0	0	0	0	0	0	0	0	0	1	0	0	0	0	0	0	0	0	15	0	0	0	0	0	0	0	0	0	0	0	0	0	0	0	0	0
ERV316A3_12q21.31g	0	0	0	0	0	0	0	0	0	0	0	0	0	0	0	0	0	0	0	0	0	0	0	0	0	0	0	0	0	0	0	12	0	0	0	0	0	0	0	0	0	0	0	0	0	0	0	0	0
ERV316A3_12q21.32a	0	0	0	0	0	0	0	0	0	0	0	0	0	7	0	0	0	0	0	0	0	0	0	0	0	0	0	0	0	0	0	32	0	0	0	0	0	0	0	0	0	0	0	0	0	0	0	0	0
ERV316A3_12q21.32b	0	0	0	0	0	0	0	0	0	0	0	0	0	0	0	0	0	0	0	0	0	0	0	0	0	0	0	0	2	0	0	9	0	0	0	0	0	0	0	0	0	0	0	0	0	0	0	0	0
ERV316A3_12q21.32c	0	0	0	0	0	0	0	0	0	0	0	0	0	0	0	0	0	0	0	0	0	0	0	0	0	0	0	0	0	1	0	19	0	0	0	0	0	0	0	0	0	0	0	0	0	0	0	0	0
ERV316A3_12q21.33a	0	0	0	0	0	0	0	0	0	0	0	0	0	0	0	0	0	0	0	0	0	0	0	0	0	0	0	0	0	0	0	5	0	0	0	0	0	0	0	0	0	0	0	0	0	0	0	1	0
ERV316A3_12q21.33b	0	0	0	0	0	0	0	0	0	0	0	0	0	0	0	0	0	0	0	0	0	0	0	0	0	0	0	0	0	0	0	8	0	0	0	0	0	0	0	0	0	0	0	0	0	0	0	0	0
ERV316A3_12q21.33c	0	0	0	0	0	0	0	4	0	0	0	0	0	0	0	0	0	0	0	0	0	0	1	0	0	0	1	0	0	0	0	41	0	0	0	0	0	0	0	0	0	1	0	0	0	0	0	3	0
ERV316A3_12q21.33d	0	0	1	0	0	0	0	8	0	0	1	0	0	1	0	0	0	0	0	0	0	0	1	0	1	5	2	0	0	0	0	13	1	0	0	0	0	0	1	1	0	0	0	0	0	1	0	6	0
ERV316A3_12q21.33e	0	0	2	0	0	0	0	0	30	0	0	0	0	1	3	2	1	3	0	0	0	13	37	42	9	0	0	0	0	0	0	43	0	0	0	0	0	0	0	0	0	0	0	0	0	0	1	0	0
ERV316A3_12q21.33f	0	0	0	0	3	0	0	1	0	0	0	0	0	1	0	1	3	0	1	0	0	0	3	0	0	0	0	0	1	0	0	38	1	0	14	0	0	1	0	1	27	1	4	0	3	1	0	0	0
ERV316A3_12q21.33g	0	0	0	0	0	0	0	0	0	0	0	0	0	0	0	1	0	0	0	0	0	0	1	0	0	0	0	0	0	1	0	11	0	0	0	0	0	0	0	0	0	0	0	0	1	0	0	0	0
ERV316A3_12q21.33h	0	0	0	0	2	0	0	1	0	0	0	0	0	1	0	5	1	0	0	0	0	0	0	0	0	0	0	0	0	0	0	30	0	0	0	0	0	0	0	0	1	0	1	0	0	0	1	0	0
ERV316A3_12q21.33i	0	0	0	0	6	0	0	0	1	0	0	0	0	0	0	0	0	0	0	0	0	0	1	0	0	0	0	0	0	0	0	35	1	1	2	0	0	0	0	0	0	0	0	0	0	0	0	0	0
ERV316A3_12q21.33j	0	0	0	0	0	0	0	0	0	0	0	0	0	0	0	2	0	0	0	0	0	0	0	0	0	0	0	0	0	0	0	4	0	0	0	0	0	0	0	0	0	0	0	0	0	0	0	0	0
ERV316A3_12q21.33k	0	1	0	0	1	0	1	0	0	0	0	1	0	2	0	0	0	0	0	0	0	0	2	0	0	0	0	1	1	3	4	11	0	0	0	0	0	0	0	0	0	0	2	1	0	0	0	0	0
ERV316A3_12q22	0	0	0	0	0	0	0	0	0	0	0	0	0	0	0	0	1	0	0	0	0	0	0	0	0	0	0	0	0	0	0	42	0	0	0	0	0	0	0	0	0	0	0	0	0	0	0	0	0
ERV316A3_12q23.1	3	1	0	0	0	0	0	1	0	1	0	0	0	0	3	0	0	0	0	0	0	0	0	0	0	0	0	1	1	2	0	8	0	0	0	0	0	1	0	0	0	3	2	0	2	0	0	0	0
ERV316A3_12q23.2a	0	0	2	4	2	0	1	0	1	1	0	0	0	3	0	2	1	1	0	2	0	0	2	1	0	0	0	0	1	0	1	20	1	0	0	0	0	1	0	0	1	0	4	1	2	0	0	1	0
ERV316A3_12q23.2b	0	0	1	0	0	0	0	0	0	0	0	0	0	2	0	0	0	0	0	0	0	0	0	0	1	0	0	1	1	0	3	8	0	0	0	0	0	0	1	0	2	0	0	0	1	0	0	2	0
ERV316A3_12q23.3a	2	3	6	0	1	1	1	2	0	0	0	0	0	0	1	0	0	0	0	0	0	0	2	1	1	2	2	0	3	3	3	35	0	0	1	0	3	0	0	0	1	0	2	0	0	0	0	0	0
ERV316A3_12q23.3b	0	0	0	1	0	0	0	1	0	0	0	0	0	0	0	0	0	1	0	0	0	0	1	3	0	0	0	0	1	1	0	31	0	0	0	0	0	0	0	0	1	0	0	0	0	0	0	0	0
ERV316A3_12q23.3c	0	0	1	0	0	0	0	0	0	0	0	0	0	1	0	0	0	0	0	0	0	0	0	0	0	0	0	0	0	2	0	35	0	0	0	0	0	0	0	0	0	0	0	0	0	0	0	1	0
ERV316A3_12q23.3d	0	0	0	0	0	0	0	0	0	0	0	0	0	0	0	0	0	0	0	0	0	0	0	0	0	0	0	0	0	0	0	6	0	0	0	0	0	0	0	0	0	0	0	0	0	0	0	0	0
ERV316A3_12q23.3e	0	0	0	0	0	0	0	0	0	0	0	0	0	0	0	0	0	0	0	0	0	0	0	0	0	0	0	0	0	0	0	30	0	0	0	0	0	0	0	0	0	0	1	0	0	0	0	0	0
ERV316A3_12q24.11	1	0	1	2	1	3	2	1	1	0	0	0	2	7	1	0	0	0	3	2	3	2	6	3	0	0	0	0	3	8	3	24	1	1	0	0	1	0	3	0	1	3	3	0	4	0	3	4	1
ERV316A3_12q24.13	2	23	1	2	19	1	2	9	5	40	0	17	5	52	20	0	22	21	32	12	12	0	93	132	6	14	9	17	13	24	51	10	4	7	3	8	13	17	30	20	28	26	9	13	65	7	9	8	32
ERV316A3_12q24.21	0	0	1	0	0	0	0	0	0	0	0	0	0	0	0	0	0	0	0	0	0	0	4	0	0	8	0	0	0	0	0	26	1	0	0	0	0	0	1	0	0	0	0	0	0	0	0	0	1
ERV316A3_12q24.23	0	0	0	0	0	0	0	0	0	0	0	0	0	0	0	0	0	0	0	0	0	0	1	0	1	0	0	0	0	0	0	14	0	0	0	0	0	0	0	0	0	0	0	0	0	0	0	0	0
ERV316A3_12q24.32a	0	0	0	0	0	0	0	0	0	0	0	0	0	0	0	0	0	0	0	0	3	0	0	0	1	0	0	0	0	0	0	15	0	0	0	0	0	0	0	0	0	0	0	0	0	0	0	0	0
ERV316A3_12q24.32b	0	0	0	0	6	0	0	0	0	0	0	0	0	0	0	1	0	0	0	0	0	0	1	0	1	0	0	0	1	0	1	30	0	0	0	0	0	1	0	0	0	4	0	0	0	1	0	0	0
ERV316A3_12q24.32c	0	0	0	0	0	0	0	0	0	0	0	0	0	0	0	0	0	0	0	0	0	0	1	0	0	0	0	0	0	0	0	12	0	0	0	0	0	0	0	0	0	0	0	0	0	0	0	8	0
ERV316A3_12q24.32d	0	0	0	0	0	0	0	0	0	0	0	0	0	0	0	0	0	0	0	1	0	3	0	0	0	0	0	0	0	0	0	21	0	0	0	0	0	0	0	0	0	0	0	0	0	3	0	0	0
ERV316A3_12q24.33	0	0	0	1	0	0	0	0	0	0	0	0	1	2	0	0	1	0	0	0	0	0	1	0	0	0	1	1	0	3	0	24	0	1	1	0	0	0	0	0	0	0	0	1	0	0	0	0	0
ERV316A3_13q12.12a	0	24	0	0	0	0	0	0	0	0	0	0	2	0	0	0	0	0	0	0	0	0	0	0	0	0	0	0	0	1	0	23	0	0	0	0	0	0	0	0	0	0	0	1	0	0	0	0	0
ERV316A3_13q12.12b	0	0	0	0	0	0	0	0	0	0	0	0	0	0	0	0	0	1	0	0	1	0	0	0	0	0	0	0	1	1	0	22	0	0	0	0	0	0	0	0	0	0	0	0	0	0	0	0	0
ERV316A3_13q12.13a	0	1	0	0	0	0	0	0	0	1	0	0	0	0	0	0	0	0	0	0	0	0	1	0	0	0	1	0	0	0	0	62	0	0	0	0	0	0	0	0	0	1	0	0	0	0	0	1	1
ERV316A3_13q12.13b	0	0	0	0	0	0	0	2	0	0	0	2	0	0	0	0	0	0	0	0	0	0	0	0	0	0	0	0	0	0	0	20	0	0	0	0	0	0	0	0	0	0	0	0	0	0	0	0	0
ERV316A3_13q12.13c	0	1	0	0	0	0	0	0	0	0	0	0	0	3	0	0	0	0	0	0	0	0	1	0	1	1	0	1	0	1	0	15	1	0	0	0	0	0	0	0	0	0	0	0	0	0	0	0	0
ERV316A3_13q13.1a	0	0	0	0	0	0	0	0	0	0	0	0	0	0	0	0	0	0	0	0	0	0	0	0	0	0	0	0	0	0	0	10	0	0	0	0	0	0	0	0	0	0	0	0	0	0	0	0	0
ERV316A3_13q13.1b	0	0	0	0	0	0	0	0	0	0	0	0	0	0	0	0	0	0	0	0	0	0	1	0	0	0	0	0	0	0	0	12	0	0	0	0	1	0	0	0	0	0	0	0	0	0	0	0	0
ERV316A3_13q13.2	0	0	0	0	2	0	0	0	0	0	0	0	0	0	0	0	0	0	0	0	0	0	3	0	0	0	0	0	0	1	0	32	0	0	0	0	0	0	0	0	0	0	0	0	0	0	1	0	0
ERV316A3_13q13.3a	0	0	0	0	0	0	0	0	0	0	0	0	0	0	0	0	0	0	0	0	0	0	0	0	0	0	0	0	0	0	0	12	0	0	0	0	0	0	0	0	0	0	0	0	0	0	0	0	0
ERV316A3_13q13.3b	0	0	0	0	0	0	0	0	0	0	0	0	0	0	0	0	0	0	0	0	0	0	0	0	0	0	0	0	0	0	0	12	0	0	0	0	0	0	0	0	0	0	0	0	0	0	0	0	0
ERV316A3_13q13.3c	16	37	25	25	7	18	26	52	14	0	1	29	0	143	3	5	76	1	7	47	65	11	33	14	31	35	32	15	93	27	84	52	82	10	26	2	53	24	10	8	59	3	40	1	1	0	11	19	1
ERV316A3_13q13.3d	0	0	0	0	0	0	1	0	0	0	0	0	0	0	0	0	0	0	0	0	0	0	1	0	0	0	0	0	0	0	0	6	1	0	0	0	0	0	0	0	0	0	0	0	0	0	0	0	0
ERV316A3_13q13.3e	0	1	0	0	2	0	2	0	0	3	0	0	1	2	1	0	2	2	1	3	4	0	3	1	0	0	1	1	3	2	1	48	0	0	0	0	2	0	0	4	0	1	1	0	1	0	0	1	1
ERV316A3_13q13.3f	0	0	0	0	0	0	0	0	0	0	0	0	0	0	0	0	0	0	0	0	0	0	2	0	0	0	0	0	0	1	0	13	0	0	0	0	0	0	0	0	0	0	0	0	0	0	0	0	0
ERV316A3_13q13.3g	0	1	0	2	0	1	0	0	0	0	0	0	0	0	0	0	0	0	0	0	0	0	2	0	0	0	0	0	0	0	0	46	0	0	0	0	0	0	0	0	0	0	0	0	0	0	0	0	3
ERV316A3_13q14.11a	3	1	0	1	0	0	0	1	0	0	0	0	0	1	0	0	0	1	0	2	1	0	0	0	0	0	2	1	1	0	2	15	4	4	1	3	0	0	1	1	0	1	0	0	1	0	0	2	0
ERV316A3_13q14.11b	0	0	0	0	0	0	0	0	0	0	0	0	0	0	0	0	0	0	0	0	0	0	2	0	0	0	0	0	0	0	0	14	0	0	0	0	0	0	0	0	0	0	0	0	0	0	0	0	0
ERV316A3_13q14.13	7	0	1	3	3	1	1	3	4	1	0	0	1	1	1	0	0	1	2	1	1	6	4	6	2	0	1	0	0	2	1	42	4	1	4	0	2	0	0	5	2	6	3	5	1	0	6	1	9
ERV316A3_13q14.2a	0	0	0	0	0	0	0	0	0	0	0	0	0	0	0	0	0	0	0	0	0	0	0	0	0	1	0	0	0	0	2	11	0	0	0	0	0	0	0	0	0	0	0	0	0	0	0	0	0
ERV316A3_13q14.2b	0	0	0	0	0	0	0	4	0	0	0	0	0	0	0	0	0	0	0	0	0	0	0	0	0	0	0	0	0	0	0	22	0	0	0	0	0	0	1	0	0	0	0	0	0	0	0	0	0
ERV316A3_13q14.3a	2	1	0	0	0	0	1	0	0	0	0	0	0	0	0	0	1	0	0	0	0	0	1	0	0	1	1	0	1	0	0	14	1	0	0	0	0	0	0	1	0	0	1	0	0	1	0	1	0
ERV316A3_13q14.3b	0	0	0	0	0	2	0	0	1	0	0	1	0	3	0	0	2	0	0	0	0	0	3	0	1	0	0	0	4	0	0	33	1	0	1	0	0	0	0	0	2	0	0	0	0	0	0	0	0
ERV316A3_13q21.1a	0	0	0	0	0	0	0	0	0	0	0	0	0	0	0	0	0	0	0	0	0	0	0	0	0	0	0	0	0	0	0	4	0	0	0	0	0	0	0	0	0	0	0	0	0	0	0	0	0
ERV316A3_13q21.1b	0	0	0	0	0	0	0	0	0	0	0	0	0	0	0	0	0	0	0	0	0	0	1	0	0	0	0	0	0	0	0	10	0	0	0	0	0	0	0	0	0	0	0	0	0	0	0	0	0
ERV316A3_13q21.1c	0	0	0	0	0	0	0	0	0	0	0	0	0	5	0	0	0	0	0	0	0	0	0	0	0	0	0	0	1	0	0	49	0	0	0	0	0	0	0	0	0	0	0	0	0	0	0	0	0
ERV316A3_13q21.1d	1	0	0	0	2	0	0	0	0	0	0	0	0	0	0	0	0	0	0	0	0	0	2	0	0	0	0	0	0	0	0	25	0	0	0	0	0	0	0	0	0	0	0	0	0	0	0	0	0
ERV316A3_13q21.31a	0	0	0	0	0	0	0	0	0	0	0	0	0	0	0	0	0	0	0	0	0	0	0	0	0	0	0	0	0	0	0	10	0	0	0	0	0	0	0	0	0	0	0	0	0	0	0	0	0
ERV316A3_13q21.31b	0	0	0	0	0	0	0	0	0	0	0	0	0	0	0	0	0	0	0	0	0	0	0	0	0	0	0	0	0	0	0	28	0	0	0	0	0	0	0	0	0	0	0	0	0	0	0	0	0
ERV316A3_13q21.31c	0	0	0	0	0	0	0	0	0	0	0	0	0	0	0	0	0	0	0	0	0	0	1	0	0	0	0	0	0	0	0	31	0	0	0	0	0	0	0	0	0	0	0	0	0	0	0	0	0
ERV316A3_13q21.31d	0	0	0	0	0	0	0	0	0	0	0	0	0	1	0	0	0	0	0	0	0	0	1	0	0	0	0	0	0	0	0	14	0	0	0	0	0	0	0	0	0	0	0	0	0	0	0	0	0
ERV316A3_13q21.32a	0	0	0	0	0	0	0	0	0	0	0	0	0	1	0	0	0	0	0	0	0	0	1	0	0	0	0	0	0	0	0	52	0	0	2	0	0	0	0	0	0	0	0	0	0	0	0	0	0
ERV316A3_13q21.32b	0	0	0	0	0	0	0	0	0	0	0	0	0	1	0	0	0	0	0	0	0	0	0	0	0	0	0	0	1	0	0	4	0	0	0	0	0	0	0	0	0	0	0	0	0	0	0	0	0
ERV316A3_13q21.32c	0	0	0	0	0	0	0	0	0	0	0	0	0	0	0	0	0	0	0	0	0	0	3	0	0	0	0	0	0	0	0	33	0	0	0	0	0	0	0	0	0	0	0	0	0	0	0	0	0
ERV316A3_13q21.32d	0	0	0	0	0	0	0	0	0	0	0	0	0	0	0	0	0	0	0	0	0	0	1	0	0	0	0	0	0	0	0	9	0	0	0	0	0	0	0	0	0	0	0	0	0	0	0	0	0
ERV316A3_13q21.32e	1	0	0	0	2	0	0	4	0	0	0	0	0	1	0	0	0	0	0	0	0	4	0	0	1	0	3	0	0	0	0	19	0	0	5	0	0	0	0	0	0	0	0	0	0	0	0	0	0
ERV316A3_13q21.33a	0	0	0	0	0	0	0	0	0	0	0	0	0	0	0	0	0	0	0	0	0	0	0	1	0	0	0	0	0	0	0	7	0	0	0	0	0	0	0	0	0	0	0	0	0	0	0	0	0
ERV316A3_13q21.33b	0	0	0	0	0	0	0	0	0	0	0	0	0	0	0	0	0	0	0	0	0	0	0	0	0	0	0	0	0	0	0	22	0	0	0	0	0	0	0	0	0	0	0	0	0	0	0	0	0
ERV316A3_13q22.2a	0	0	0	0	1	0	0	0	0	0	0	0	0	0	0	0	1	0	0	0	0	0	0	0	0	0	0	0	0	0	0	20	0	0	0	0	0	0	0	0	0	0	0	1	0	0	0	0	0
ERV316A3_13q22.2b	0	0	0	0	0	0	0	0	0	0	0	0	0	0	0	0	0	0	0	0	0	0	0	0	0	0	0	0	0	0	0	12	0	0	0	0	0	0	0	0	0	1	0	0	0	0	0	0	0
ERV316A3_13q22.3a	0	1	0	0	0	0	1	0	0	4	0	0	0	1	0	0	0	1	0	0	2	0	0	0	0	0	0	0	3	3	0	8	0	0	1	1	0	0	0	0	0	0	0	1	0	0	0	0	0
ERV316A3_13q22.3b	0	1	0	1	0	0	0	0	0	0	0	0	0	0	0	0	0	0	0	0	1	1	2	0	0	0	0	0	4	2	2	30	0	0	1	0	0	0	0	1	0	1	3	2	0	0	0	0	0
ERV316A3_13q31.1a	0	0	0	0	0	0	0	0	0	0	0	0	0	0	0	0	0	0	0	0	0	0	0	0	0	0	0	0	0	0	0	19	0	0	0	0	0	0	0	0	0	0	0	0	0	0	0	0	1
ERV316A3_13q31.1b	0	0	0	0	0	0	1	0	0	0	0	0	0	1	0	0	0	0	1	1	0	1	0	1	1	0	1	0	0	1	0	38	0	0	1	0	0	0	0	0	3	0	0	0	0	0	0	0	0
ERV316A3_13q31.1c	1	0	0	0	0	0	0	0	0	0	0	0	0	0	0	0	0	0	0	0	0	0	0	0	0	0	2	0	0	0	0	14	0	0	0	0	0	0	0	0	0	0	0	0	0	0	0	0	0
ERV316A3_13q31.1d	12	0	0	0	0	211	0	0	0	1	0	0	0	30	0	0	0	0	0	1	0	0	0	0	0	0	0	8	0	0	5	27	30	0	0	1	0	0	0	0	0	0	3	2	0	0	37	69	19
ERV316A3_13q31.1e	0	0	0	0	0	0	1	0	0	0	0	0	0	0	0	0	0	0	0	1	0	0	1	0	0	9	8	1	0	0	0	14	1	0	0	0	0	0	0	0	28	0	2	0	0	0	2	0	0
ERV316A3_13q31.1f	0	0	0	0	0	0	0	0	0	0	0	0	0	0	0	0	0	0	0	0	0	2	0	0	0	0	0	0	0	0	0	39	4	0	0	0	0	0	0	0	0	0	0	0	0	0	0	0	0
ERV316A3_13q31.1g	0	0	0	0	0	0	0	0	0	0	0	0	0	0	0	0	0	0	0	0	0	0	1	0	0	0	0	0	0	0	0	14	0	0	0	0	0	0	0	0	0	0	0	0	0	0	0	0	0
ERV316A3_13q31.2a	0	0	0	0	0	1	0	0	0	0	0	0	0	5	0	0	0	0	0	0	0	0	1	0	0	0	0	0	0	0	1	11	0	0	0	0	0	0	0	0	0	0	0	0	0	0	0	7	0
ERV316A3_13q31.2b	0	1	0	0	0	0	0	0	0	0	0	0	0	0	0	0	0	0	0	0	0	0	0	0	0	0	0	0	0	0	0	33	0	0	0	0	0	0	0	0	0	0	0	0	0	0	0	0	0
ERV316A3_13q31.2c	0	0	0	0	0	0	0	0	0	0	0	0	0	0	0	0	0	0	0	0	0	0	0	0	0	0	0	0	0	0	0	16	0	0	0	0	0	0	0	0	0	0	0	0	0	0	0	1	0
ERV316A3_13q31.3a	0	0	0	0	0	0	0	0	0	0	0	0	0	0	0	0	0	0	0	0	0	0	0	0	0	0	0	0	0	0	0	21	0	0	0	0	0	0	0	0	0	0	0	0	0	0	0	0	0
ERV316A3_13q31.3b	0	0	0	0	0	0	0	0	0	0	0	0	0	0	0	0	0	0	0	0	0	0	1	0	0	0	0	0	3	1	0	70	0	0	0	0	0	0	0	2	2	0	0	0	0	0	0	0	0
ERV316A3_13q31.3c	0	0	0	0	0	0	0	0	0	0	0	0	0	2	0	0	0	0	0	0	0	0	0	0	0	0	0	0	0	0	0	15	0	0	0	0	0	0	0	0	0	0	0	0	0	0	0	0	0
ERV316A3_13q31.3d	0	0	0	0	0	0	0	0	0	0	0	0	0	0	0	0	0	0	0	0	0	0	0	0	0	0	0	0	0	0	0	9	0	0	0	0	0	0	1	0	0	0	0	0	0	0	0	0	0
ERV316A3_13q31.3e	0	0	0	0	1	0	0	0	0	0	0	0	0	5	0	0	0	0	0	0	0	3	1	2	0	0	0	1	0	0	1	22	0	0	0	0	0	0	0	0	1	0	0	0	0	0	0	0	0
ERV316A3_13q31.3f	0	0	0	0	0	0	0	0	0	0	0	0	0	0	0	0	0	0	0	0	1	1	0	0	0	0	0	1	0	0	0	8	0	0	0	0	0	0	0	0	0	0	0	0	1	0	0	0	0
ERV316A3_13q32.1a	0	3	3	0	2	0	0	0	0	2	0	0	0	4	1	0	1	0	2	0	1	2	7	6	1	2	0	3	6	9	8	21	2	0	2	1	0	0	5	0	0	2	2	2	1	2	1	2	1
ERV316A3_13q32.1b	0	6	0	2	5	4	1	4	0	6	0	0	0	9	4	0	2	3	4	4	5	2	1	3	1	4	1	3	14	7	7	9	13	0	5	0	5	2	7	2	2	2	1	2	2	1	5	6	3
ERV316A3_13q32.1c	0	0	0	0	0	0	0	0	0	0	0	0	0	0	0	0	0	0	1	0	0	0	0	0	0	1	0	0	1	5	0	11	1	0	1	0	0	0	0	0	0	0	0	0	1	1	0	0	0
ERV316A3_13q32.3	0	2	1	0	0	1	0	0	0	1	2	0	0	2	0	2	1	1	1	0	0	0	2	0	1	2	0	0	1	3	1	19	6	3	3	0	2	1	2	2	1	0	2	0	2	4	4	6	1
ERV316A3_13q33.2	0	0	0	0	0	0	0	0	0	0	0	0	0	0	0	0	0	0	0	0	0	0	0	0	0	0	0	0	0	0	0	34	0	0	0	0	0	0	0	0	0	0	0	0	0	0	0	0	0
ERV316A3_13q33.3a	0	0	0	0	0	0	0	0	0	0	0	0	0	0	0	0	0	0	0	0	0	0	0	0	0	0	0	0	0	0	0	2	0	0	0	0	0	0	0	0	0	0	0	0	0	0	0	0	0
ERV316A3_13q33.3b	0	0	0	0	0	0	0	0	0	0	0	0	0	1	1	0	0	0	0	0	0	0	1	0	2	0	0	0	0	0	0	12	0	0	0	0	0	0	1	0	0	0	0	0	0	0	0	18	0
ERV316A3_13q33.3c	0	0	0	0	0	0	0	1	0	0	0	0	0	0	0	0	0	0	0	0	2	0	0	0	0	0	0	0	0	0	0	9	0	0	1	0	0	0	0	0	0	0	0	0	0	0	0	4	0
ERV316A3_13q34a	0	0	0	0	0	0	0	0	0	0	0	0	0	0	0	0	0	0	0	0	0	0	0	0	0	0	0	0	0	0	0	0	0	0	0	0	0	0	0	0	0	0	0	0	0	0	0	0	0
ERV316A3_13q34b	0	0	0	0	0	0	0	0	0	0	0	0	0	0	0	0	0	0	0	0	0	0	0	0	0	0	0	0	0	0	0	15	0	0	0	0	0	0	0	0	0	0	0	0	0	0	0	0	0
ERV316A3_14q11.2a	0	0	0	0	0	0	0	0	0	0	0	0	0	0	0	0	0	0	0	0	0	0	0	0	0	0	0	0	0	0	0	8	0	0	0	0	0	0	0	0	0	0	0	0	0	0	0	0	0
ERV316A3_14q11.2b	0	0	0	0	0	0	0	0	0	0	0	0	0	0	0	0	0	0	0	0	0	0	0	0	0	0	0	0	3	0	0	10	0	0	0	0	0	0	0	0	0	0	0	0	0	0	0	0	0
ERV316A3_14q11.2c	0	0	0	0	0	0	0	0	0	0	0	0	0	0	0	0	0	0	0	0	0	0	0	0	0	0	0	0	0	0	0	6	0	0	0	0	0	0	0	0	0	0	0	0	0	0	0	0	0
ERV316A3_14q11.2d	0	0	0	0	0	0	0	0	0	0	0	0	0	0	0	0	0	0	0	0	0	0	2	0	0	0	0	0	0	0	0	26	0	0	0	0	0	0	0	0	0	0	0	0	0	0	0	0	0
ERV316A3_14q11.2e	0	0	0	0	0	0	0	0	0	0	0	0	0	0	0	0	0	0	0	0	0	0	0	0	0	0	0	0	0	0	0	10	0	0	0	0	0	0	0	0	0	0	0	0	0	0	0	0	0
ERV316A3_14q11.2f	0	0	2	1	0	0	0	1	0	0	0	0	0	2	0	0	0	0	2	0	0	0	0	0	0	0	0	0	1	0	2	11	0	0	1	0	0	0	0	1	1	0	0	0	0	0	0	1	2
ERV316A3_14q11.2g	0	0	0	0	0	0	0	0	0	0	0	0	0	0	0	0	0	0	0	0	0	0	0	0	0	0	0	0	0	0	0	8	0	0	0	0	1	0	0	0	0	0	0	0	1	0	0	0	1
ERV316A3_14q11.2h	0	0	1	0	0	0	0	0	0	1	0	2	0	0	0	0	0	0	0	0	0	0	1	0	0	0	0	0	0	0	0	15	0	0	0	1	0	0	0	1	0	1	0	0	0	0	0	0	0
ERV316A3_14q12a	0	0	0	0	0	0	0	0	0	0	0	0	0	0	0	0	0	0	0	0	0	0	1	0	0	0	0	0	1	0	0	2	0	0	0	0	0	0	0	0	0	0	0	0	0	0	0	0	0
ERV316A3_14q12b	0	0	0	0	0	0	0	0	0	0	0	0	0	0	0	0	0	0	0	0	0	0	0	0	0	0	0	0	0	1	0	25	0	0	0	0	0	0	0	0	0	0	0	0	0	0	0	0	0
ERV316A3_14q12c	0	0	0	0	0	0	0	0	0	0	0	0	0	0	0	0	0	0	0	0	0	0	0	0	0	0	0	0	0	0	0	19	0	0	0	0	0	0	0	0	0	0	0	0	0	0	0	0	0
ERV316A3_14q12d	0	0	0	7	5	5	1	7	0	0	0	1	0	3	0	0	10	1	0	3	0	4	0	0	1	0	2	8	12	5	4	24	5	1	1	0	1	0	2	1	3	0	2	1	0	0	0	1	0
ERV316A3_14q12e	0	0	0	0	0	0	0	0	0	0	0	0	0	0	0	0	1	1	2	0	0	0	0	0	0	0	0	0	0	0	1	41	1	0	0	0	0	0	0	0	0	0	0	0	0	0	0	0	0
ERV316A3_14q12f	0	0	0	0	0	0	0	0	0	0	0	0	0	0	0	0	0	0	0	0	0	0	0	0	0	0	0	0	0	0	0	34	0	0	0	0	0	0	0	0	0	0	0	0	0	0	0	0	0
ERV316A3_14q12g	0	0	0	0	0	0	0	0	0	0	0	0	0	0	0	0	0	0	0	0	0	0	0	0	0	0	0	0	0	0	0	2	0	0	0	0	0	0	0	0	0	0	0	0	0	0	0	0	0
ERV316A3_14q12h	0	0	0	0	0	0	0	0	0	0	0	0	0	0	0	0	1	0	0	0	0	0	0	0	0	0	0	0	0	0	0	39	0	0	0	0	0	0	0	0	0	0	0	0	0	1	0	0	0
ERV316A3_14q13.1a	0	0	0	0	0	0	0	0	0	0	0	0	0	0	0	0	0	0	0	0	0	0	0	0	0	0	0	0	0	0	0	31	0	0	0	0	0	0	0	0	1	0	0	0	0	0	0	0	0
ERV316A3_14q13.1b	4	1	1	0	0	1	0	0	0	0	2	0	0	0	0	0	0	1	0	0	0	6	4	1	1	0	0	0	0	1	0	48	1	0	2	0	1	0	1	0	0	0	1	0	1	1	3	0	0
ERV316A3_14q13.3	0	0	0	0	0	0	0	1	0	0	0	0	0	0	0	0	0	0	0	0	0	0	0	0	0	0	0	0	0	0	0	40	0	0	0	0	0	0	0	0	1	0	0	0	1	0	0	0	0
ERV316A3_14q21.1a	0	0	0	0	1	0	0	0	0	0	0	0	0	0	0	0	0	0	0	0	0	0	1	0	0	0	0	0	0	0	0	12	0	0	0	0	0	0	0	0	0	0	0	0	0	0	0	0	0
ERV316A3_14q21.1b	0	1	2	0	1	3	3	0	1	2	0	1	1	0	2	1	2	0	0	0	2	0	3	0	0	0	4	1	5	1	6	23	3	0	0	0	1	0	0	2	0	1	2	0	2	3	0	1	1
ERV316A3_14q21.1c	3	1	0	0	0	1	0	4	4	0	0	1	0	0	0	0	0	0	0	0	0	0	1	0	0	0	0	0	0	1	0	23	0	0	0	0	0	0	0	0	1	1	0	0	0	0	1	0	1
ERV316A3_14q21.1d	0	0	0	0	0	0	0	2	0	0	0	0	0	0	0	0	0	0	0	0	0	0	2	0	0	1	0	0	0	0	0	10	1	0	0	0	0	0	0	0	0	0	0	0	0	0	0	0	0
ERV316A3_14q21.2a	0	1	0	0	1	0	0	0	0	0	0	0	0	0	0	0	0	0	0	0	0	0	0	0	0	0	1	0	0	0	0	13	0	0	0	0	0	0	0	0	0	0	1	0	1	0	0	1	0
ERV316A3_14q21.2b	0	0	0	0	1	0	0	0	0	0	0	0	0	0	0	0	0	2	0	0	0	0	0	0	0	0	0	1	0	0	0	8	0	0	0	0	0	0	0	0	0	0	0	0	0	0	0	1	0
ERV316A3_14q21.3a	0	0	0	0	0	0	0	0	0	0	0	0	0	0	0	0	0	0	0	0	0	0	1	0	0	0	0	0	0	0	0	14	0	0	0	0	0	0	0	0	0	0	0	0	0	0	0	0	0
ERV316A3_14q21.3b	0	0	0	0	0	0	0	0	0	0	0	0	0	0	0	0	0	0	0	0	0	0	0	0	0	0	0	0	0	0	0	17	1	0	0	0	0	0	0	0	0	0	0	0	1	0	0	0	0
ERV316A3_14q21.3c	104	3	1	164	145	6	0	183	0	0	0	132	0	2	0	0	0	0	0	29	0	12	2	1	9	0	194	25	7	101	138	16	265	2	92	4	0	6	36	1	116	27	1	6	84	0	9	75	1
ERV316A3_14q21.3d	0	0	0	0	0	0	0	0	0	0	0	0	0	0	0	0	0	0	0	0	0	0	2	0	0	0	0	0	0	0	0	30	0	0	0	0	0	0	0	0	0	0	0	0	0	0	0	0	0
ERV316A3_14q21.3e	0	0	0	0	0	0	0	0	0	0	0	0	0	0	0	0	0	0	0	0	0	0	0	0	0	0	0	0	0	0	0	15	0	0	0	0	0	0	0	0	0	0	0	0	0	0	0	0	0
ERV316A3_14q22.1	0	0	0	0	0	0	0	0	0	0	0	0	0	0	0	0	0	1	0	0	0	0	0	0	0	0	0	1	0	0	0	24	1	0	0	0	0	0	0	0	0	0	0	0	0	0	0	0	0
ERV316A3_14q22.2	0	0	0	0	0	0	0	0	0	0	0	0	0	0	0	0	0	0	0	0	0	0	0	0	0	0	0	0	0	0	3	30	0	0	1	0	1	0	0	1	0	0	0	0	0	0	0	0	0
ERV316A3_14q22.3a	0	1	2	1	0	0	0	0	0	0	0	0	0	1	1	1	0	0	0	1	0	0	0	1	0	0	0	0	0	2	0	6	1	0	0	0	0	0	0	0	1	0	0	0	0	0	4	0	0
ERV316A3_14q22.3b	0	0	0	0	0	0	0	0	1	1	0	0	0	0	0	0	3	0	0	0	1	0	2	1	0	0	1	1	0	1	0	15	1	0	0	0	0	0	0	0	0	1	0	0	0	0	0	1	0
ERV316A3_14q23.1a	0	0	0	0	0	0	0	0	0	0	0	0	0	0	0	0	0	0	0	0	0	0	1	0	0	0	0	0	0	2	0	16	0	0	0	0	0	0	0	0	0	0	0	0	0	0	0	3	0
ERV316A3_14q23.1b	0	0	0	0	0	0	0	0	0	0	0	0	0	0	0	0	0	0	0	0	0	0	0	0	1	0	0	0	0	1	1	19	0	0	0	0	0	0	0	0	0	0	0	0	0	0	0	4	0
ERV316A3_14q23.1c	0	0	0	0	0	0	0	0	0	0	0	0	0	0	0	0	0	0	0	0	0	0	1	0	1	0	0	0	0	0	1	28	0	0	0	0	0	0	0	0	0	0	0	0	0	0	0	8	0
ERV316A3_14q23.1d	0	0	0	0	0	0	0	0	0	0	0	0	0	0	0	0	0	0	0	0	0	0	0	0	0	0	0	0	0	0	0	27	0	0	0	0	0	0	0	0	1	0	0	0	1	0	1	0	0
ERV316A3_14q23.1e	0	0	0	0	0	0	0	1	0	0	0	0	0	1	1	0	2	0	0	1	1	0	2	0	0	0	0	0	2	5	0	23	2	0	0	0	1	1	0	1	0	1	1	0	2	0	2	1	0
ERV316A3_14q23.2a	0	0	0	0	0	0	0	2	0	0	0	1	1	1	0	0	0	0	0	0	0	0	4	5	0	0	1	0	0	1	0	16	0	0	1	0	2	1	0	0	0	0	0	0	2	1	0	0	0
ERV316A3_14q23.2b	0	0	0	0	0	0	0	0	0	0	0	0	0	0	0	0	0	0	0	0	0	0	0	0	0	0	0	0	0	0	0	22	0	0	1	0	0	1	0	0	0	0	0	0	0	0	0	1	0
ERV316A3_14q24.2a	0	0	0	0	0	0	0	0	0	0	0	0	0	0	0	0	0	1	0	0	0	0	0	0	0	0	0	0	0	0	0	7	0	0	0	0	0	0	0	0	0	0	0	0	0	0	0	0	0
ERV316A3_14q24.2b	0	0	0	0	0	0	0	0	0	0	0	0	0	0	0	0	0	0	0	0	0	0	1	0	0	0	0	0	0	0	1	10	0	0	0	0	0	0	0	0	0	0	0	0	0	0	0	0	0
ERV316A3_14q24.2c	3	0	1	0	0	0	0	1	1	1	0	0	0	2	0	0	0	0	0	0	2	0	1	1	0	0	0	0	0	3	3	4	0	0	0	0	0	0	0	0	0	0	0	0	0	0	0	0	0
ERV316A3_14q24.2d	0	0	0	2	2	0	0	1	0	0	0	0	0	0	0	0	0	1	0	0	0	0	0	0	0	1	0	0	0	0	3	11	2	0	0	0	0	0	0	0	0	0	1	0	0	0	0	1	0
ERV316A3_14q24.2e	2	0	1	3	3	2	3	6	1	2	0	5	0	5	0	0	1	2	4	3	4	3	6	3	2	5	1	9	3	4	9	41	0	0	1	1	0	1	2	0	0	1	2	0	3	0	0	1	3
ERV316A3_14q24.2f	0	0	0	0	0	0	0	1	0	0	0	0	0	1	0	0	1	0	1	0	0	0	0	1	0	0	4	0	2	1	2	48	3	0	0	6	0	0	1	0	1	2	0	0	2	0	3	0	1
ERV316A3_14q31.1a	0	0	0	0	0	0	0	0	0	0	0	0	0	0	0	0	0	0	0	0	0	0	0	0	0	0	0	0	0	0	0	15	0	0	0	0	0	0	0	0	0	0	0	0	0	0	0	0	0
ERV316A3_14q31.1b	0	0	0	0	0	0	0	0	0	0	0	0	0	2	0	0	0	0	2	0	1	0	1	2	0	0	0	0	0	2	0	22	0	0	0	0	0	0	0	0	0	0	0	0	0	0	0	0	0
ERV316A3_14q31.2	0	0	0	0	0	0	0	0	0	0	0	0	0	0	0	0	0	0	0	0	0	0	0	0	0	0	0	0	0	0	0	17	0	0	0	0	0	0	0	0	0	0	0	0	0	0	0	0	0
ERV316A3_14q31.3	0	0	0	0	0	0	0	0	0	0	0	0	0	0	0	0	0	0	0	0	0	0	0	0	0	0	0	0	0	0	0	20	0	0	0	0	0	0	2	0	0	0	0	0	0	0	0	0	0
ERV316A3_14q32.11a	0	0	0	0	0	0	0	0	0	0	0	0	0	0	0	0	0	0	0	0	0	0	0	0	0	0	0	0	0	0	2	26	1	0	0	0	0	0	0	0	0	0	2	0	0	0	0	0	0
ERV316A3_14q32.11b	0	0	0	0	0	0	1	0	0	1	0	1	0	2	0	0	0	1	1	0	0	0	1	0	0	0	0	1	0	0	1	4	0	0	0	0	2	0	0	0	0	1	0	0	4	0	3	0	0
ERV316A3_14q32.11c	0	0	0	0	0	0	0	0	0	2	0	1	0	1	1	0	2	2	0	0	0	0	1	0	0	0	0	0	2	1	2	7	0	0	0	0	0	2	1	0	0	0	0	0	1	0	0	0	0
ERV316A3_14q32.2a	0	0	0	0	0	0	0	0	0	0	0	0	0	1	0	0	0	0	0	0	0	0	0	0	0	0	0	0	0	0	0	25	0	0	0	1	0	0	0	0	0	0	0	0	0	0	0	0	0
ERV316A3_14q32.2b	0	0	0	1	0	0	0	0	0	0	0	0	0	0	0	0	0	0	0	0	0	0	0	2	0	0	0	0	0	0	0	16	0	0	0	0	0	0	0	0	0	0	0	0	1	0	0	9	0
ERV316A3_14q32.2c	0	0	0	0	0	0	0	0	0	0	0	0	0	0	0	0	0	0	0	0	0	0	1	0	0	0	0	0	0	0	0	6	0	0	0	0	0	0	0	0	0	0	0	0	0	0	0	0	0
ERV316A3_14q32.2d	0	0	0	0	0	0	0	0	0	0	0	0	0	0	0	0	0	0	0	0	0	0	0	0	0	0	0	0	0	0	0	23	0	0	1	0	0	0	0	0	0	0	0	0	1	0	0	0	0
ERV316A3_14q32.31a	0	0	0	0	0	0	0	0	0	0	0	0	0	0	0	0	0	0	0	0	0	0	3	0	0	0	0	0	0	0	0	18	0	0	0	0	0	0	0	0	0	0	0	0	0	0	0	0	0
ERV316A3_14q32.31b	2	0	0	0	0	0	0	0	0	0	0	0	0	0	0	0	0	0	0	0	0	0	2	0	0	0	0	0	0	0	0	72	0	0	0	0	0	0	0	0	0	0	1	0	1	1	0	0	0
ERV316A3_14q32.32	0	0	0	0	0	0	0	0	0	0	0	0	0	0	0	0	0	0	0	1	0	0	0	0	0	0	0	0	0	0	0	5	0	0	0	0	0	0	0	0	0	0	0	0	0	0	0	0	0
ERV316A3_14q32.33	0	0	0	0	0	0	0	0	0	0	0	0	0	0	0	0	0	0	0	0	0	0	0	0	1	0	0	0	0	0	0	14	1	0	0	0	1	0	0	1	0	0	0	0	1	0	0	0	0
ERV316A3_15q11.1a	0	0	0	0	0	0	0	0	0	0	0	0	0	0	0	0	0	0	0	0	0	0	0	0	0	0	0	0	0	0	0	9	0	0	0	0	0	0	0	0	0	0	0	0	0	0	0	0	0
ERV316A3_15q11.1b	0	0	0	0	0	0	0	0	0	0	0	0	0	0	0	0	0	0	0	0	0	0	0	0	0	0	0	0	0	0	0	8	0	0	0	0	0	0	0	0	0	0	0	0	0	0	0	0	0
ERV316A3_15q11.2a	0	0	0	0	0	0	0	0	0	0	0	0	0	0	0	0	0	0	0	0	0	0	0	0	0	0	0	0	0	0	0	12	0	0	0	0	0	0	0	0	0	0	0	0	0	0	0	0	0
ERV316A3_15q11.2b	0	0	0	0	0	0	0	0	0	0	0	0	0	0	0	0	0	0	0	0	0	0	0	0	0	0	0	0	0	0	0	1	18	0	0	0	0	0	0	0	0	0	0	0	0	0	0	7	0
ERV316A3_15q13.1	0	0	0	0	0	0	0	0	0	0	0	0	0	0	0	0	0	0	0	0	0	0	1	0	0	0	0	0	0	0	0	21	0	0	0	0	0	0	0	0	0	0	0	0	1	0	0	0	0
ERV316A3_15q13.3a	0	0	0	0	1	0	0	0	0	1	0	0	0	0	0	0	0	0	4	0	0	0	0	0	1	0	0	0	1	0	0	15	0	0	0	0	0	0	0	0	0	1	0	0	0	0	0	0	0
ERV316A3_15q13.3b	0	0	0	0	15	0	0	0	0	0	0	0	0	0	0	0	0	0	0	0	0	0	0	0	0	0	0	0	0	0	1	19	0	0	0	0	0	0	0	0	0	0	0	0	0	0	0	0	0
ERV316A3_15q14a	0	2	5	2	4	4	3	9	1	2	0	2	0	20	0	0	6	4	4	5	4	8	9	12	4	4	1	2	4	10	15	17	7	0	0	1	3	1	3	2	0	6	3	0	2	1	4	3	2
ERV316A3_15q14b	0	0	0	0	0	0	0	0	0	0	0	0	0	0	0	0	0	0	0	0	0	0	1	0	0	1	0	0	0	0	0	52	0	0	0	0	0	0	0	0	0	0	0	0	0	0	0	0	0
ERV316A3_15q14c	0	0	0	1	0	0	0	0	0	0	0	0	0	2	0	0	0	1	0	0	0	0	0	0	1	0	0	0	0	1	0	16	4	0	0	0	1	0	0	0	0	0	0	0	0	0	0	0	0
ERV316A3_15q14d	0	0	0	1	0	0	0	0	0	0	0	0	0	0	0	0	0	0	0	0	0	0	0	0	0	0	0	0	0	0	0	22	0	0	0	0	0	0	0	0	0	0	0	0	0	0	0	0	0
ERV316A3_15q15.1a	0	0	0	0	0	0	0	1	0	0	0	0	0	0	0	0	0	0	0	0	0	0	1	0	0	1	0	0	0	0	0	30	0	0	1	0	0	0	0	0	0	0	0	0	1	0	0	0	0
ERV316A3_15q15.1b	0	0	0	0	0	0	0	0	0	0	0	0	0	0	0	0	0	0	0	0	0	0	0	0	0	0	0	0	0	1	0	26	0	0	1	0	0	0	0	0	0	0	0	0	1	0	0	0	0
ERV316A3_15q15.2	0	0	0	0	0	0	0	0	0	0	0	0	0	0	0	0	0	0	0	0	0	0	0	0	0	0	0	0	0	0	1	10	1	0	0	0	0	0	0	0	0	0	0	0	1	0	0	1	1
ERV316A3_15q21.1a	0	0	0	0	2	2	0	0	0	0	0	1	1	0	1	0	0	0	0	1	0	0	5	1	0	0	0	0	2	0	0	44	3	0	0	0	0	0	0	0	1	0	0	0	2	0	0	2	0
ERV316A3_15q21.1b	0	0	0	0	0	2	0	0	0	0	0	0	0	0	0	0	0	0	0	0	1	1	0	0	0	0	0	0	0	0	0	8	1	0	0	0	0	1	0	0	0	0	0	0	0	0	0	0	0
ERV316A3_15q21.1c	0	0	0	0	0	0	0	0	0	0	0	0	0	1	0	0	0	0	0	0	0	0	0	0	0	0	1	0	0	0	0	12	0	0	0	0	0	0	0	0	0	0	0	0	0	0	0	0	0
ERV316A3_15q21.1d	0	0	0	0	0	0	0	0	0	0	0	0	0	0	0	0	0	0	0	0	0	0	1	0	0	0	0	0	0	0	0	35	0	0	0	0	0	0	0	0	0	0	0	0	0	0	0	0	0
ERV316A3_15q21.1e	0	0	0	0	0	0	0	0	0	0	0	0	0	0	0	0	0	0	0	0	0	0	0	0	0	0	0	0	0	3	0	37	0	0	0	0	0	0	0	0	0	1	0	0	0	0	0	0	0
ERV316A3_15q21.1f	0	0	0	0	0	0	0	0	0	0	0	0	0	0	0	0	0	0	0	0	0	0	0	0	0	0	0	0	0	0	0	17	0	0	0	0	0	0	0	0	0	0	0	0	0	0	0	0	0
ERV316A3_15q21.1g	0	0	0	0	0	2	0	0	0	0	0	0	0	0	0	0	0	0	0	0	0	1	0	0	0	0	0	0	0	0	0	39	0	0	0	0	0	0	0	0	0	0	0	0	0	0	0	1	0
ERV316A3_15q21.1h	0	0	0	0	0	0	0	0	0	0	0	0	0	0	0	0	0	0	0	0	0	0	1	0	0	0	0	0	0	0	0	38	0	0	0	0	0	0	0	0	0	0	0	0	0	0	0	0	0
ERV316A3_15q21.1i	0	0	0	0	0	0	0	0	0	0	0	0	0	0	0	0	0	0	0	0	0	0	1	0	0	0	0	0	0	0	0	20	0	0	0	0	0	0	0	0	0	0	0	0	0	0	0	0	0
ERV316A3_15q21.1j	0	0	0	0	0	0	0	0	0	0	0	0	0	0	0	0	0	0	0	0	0	0	0	0	0	0	0	0	0	0	0	6	0	0	0	0	0	0	0	0	0	0	0	0	0	0	0	0	0
ERV316A3_15q21.1k	0	0	0	0	0	0	0	0	0	0	0	0	0	0	0	0	0	0	0	0	0	0	1	0	0	0	0	0	0	0	0	23	0	0	0	0	0	0	0	0	0	0	0	0	0	0	0	0	0
ERV316A3_15q21.1l	0	0	0	0	0	0	0	0	0	0	0	0	0	0	0	0	0	0	0	0	0	0	0	0	0	0	0	0	0	0	0	11	0	0	0	0	0	0	0	0	0	0	0	0	0	0	0	0	0
ERV316A3_15q21.1m	0	0	0	1	0	0	0	1	0	0	0	0	0	2	0	0	0	0	1	0	0	0	0	0	1	0	0	0	0	0	0	29	1	0	0	0	0	0	0	0	0	0	0	0	0	0	0	1	0
ERV316A3_15q21.2a	3	10	10	6	15	3	0	5	2	4	0	4	0	19	5	0	4	6	4	7	9	0	18	11	6	12	4	7	8	23	26	30	9	1	2	2	5	8	10	8	11	14	17	2	27	1	5	19	19
ERV316A3_15q21.2b	0	1	0	0	0	0	0	0	0	1	0	0	0	0	0	0	0	0	0	0	0	0	0	0	0	0	0	0	0	0	0	9	0	0	0	0	0	0	0	0	0	0	0	0	0	0	0	0	0
ERV316A3_15q21.3a	0	0	0	0	0	0	0	0	0	0	0	0	0	0	0	0	0	0	0	0	0	0	1	0	0	0	0	0	1	0	0	27	0	0	0	0	0	0	0	0	0	0	0	0	0	0	0	0	0
ERV316A3_15q21.3b	0	0	0	0	0	0	0	0	0	0	0	0	0	0	0	0	0	0	0	0	0	0	0	0	0	0	0	0	0	0	0	10	0	0	0	0	0	0	0	0	0	0	0	0	0	0	0	0	0
ERV316A3_15q21.3c	0	0	0	0	1	0	1	2	0	0	0	1	0	1	0	0	0	0	0	0	0	0	3	5	2	0	0	1	2	5	1	19	0	0	0	2	0	0	0	0	4	1	0	0	1	0	0	1	0
ERV316A3_15q21.3d	0	1	0	0	1	0	0	0	0	0	0	0	0	2	0	0	0	0	2	1	0	3	0	0	0	1	0	0	0	0	1	20	0	0	0	0	0	0	0	0	4	0	1	0	1	0	0	0	0
ERV316A3_15q23	0	0	0	0	0	0	0	0	0	0	0	0	0	0	1	0	0	0	0	0	0	0	0	0	0	0	0	0	0	0	0	31	0	0	0	0	0	0	0	0	0	0	1	0	0	0	0	0	0
ERV316A3_15q24.1a	0	1	1	0	0	0	0	0	0	0	0	0	0	2	0	0	0	0	0	0	2	3	2	3	2	0	0	0	1	2	4	8	6	0	1	0	1	0	2	0	1	1	0	0	0	1	0	0	1
ERV316A3_15q24.1b	2	10	6	9	31	11	10	24	3	23	0	15	0	78	11	5	20	23	7	28	16	19	26	27	12	15	14	11	54	57	45	50	20	0	11	9	9	16	10	5	14	3	12	6	33	5	11	12	4
ERV316A3_15q24.2	0	0	0	0	0	0	0	0	0	0	0	0	0	0	0	0	0	0	0	0	0	0	0	0	0	0	0	0	1	0	0	11	0	0	0	0	0	0	0	0	1	0	0	0	0	0	0	0	0
ERV316A3_15q24.3a	0	0	1	0	0	0	1	0	0	0	0	0	0	0	2	1	1	2	0	2	0	0	3	0	0	0	2	0	1	1	2	39	0	0	0	0	0	0	1	0	0	0	0	0	0	0	1	0	0
ERV316A3_15q24.3b	0	0	0	0	0	0	0	0	0	0	0	0	0	0	0	0	0	0	0	0	0	0	0	0	0	0	0	0	0	0	0	6	0	0	0	0	0	0	0	0	0	0	0	0	0	0	0	0	0
ERV316A3_15q25.1a	0	0	0	0	0	0	0	0	0	0	0	0	0	0	0	0	0	0	0	0	0	0	0	0	0	0	0	0	0	0	0	8	0	0	0	0	0	0	0	0	0	0	0	0	0	0	0	0	0
ERV316A3_15q25.1b	6	3	0	4	18	1	1	8	0	3	1	1	0	14	7	1	3	3	7	5	5	2	6	9	1	3	4	2	19	41	4	44	7	0	4	0	7	3	0	6	4	5	3	2	11	0	12	13	1
ERV316A3_15q25.1c	0	0	0	0	0	0	0	0	0	1	0	0	0	0	0	0	0	0	0	0	0	0	0	0	0	0	0	0	0	0	0	22	0	0	0	0	0	0	0	0	0	0	0	0	0	0	0	0	0
ERV316A3_15q25.1d	0	0	0	0	0	0	0	0	0	0	0	0	0	0	0	0	0	0	0	0	0	0	0	0	0	0	0	0	1	0	0	10	0	0	0	0	1	0	0	1	0	0	1	0	0	0	0	1	0
ERV316A3_15q25.2a	0	2	0	1	1	0	0	0	0	0	0	0	0	1	0	0	0	0	0	0	1	0	0	0	0	0	0	0	0	0	2	9	1	0	0	0	0	0	0	0	0	0	0	0	0	0	0	0	0
ERV316A3_15q25.2b	0	0	0	3	0	0	0	0	0	0	1	0	2	0	0	0	0	1	0	0	0	0	1	0	1	0	1	0	2	2	0	35	1	1	0	0	1	2	0	0	1	0	0	0	0	0	1	0	0
ERV316A3_15q26.1	0	0	0	0	0	0	0	0	0	0	0	0	0	0	0	0	0	1	0	0	0	0	0	0	0	0	0	0	0	0	0	5	0	0	0	0	0	0	0	0	0	0	0	0	0	0	0	0	0
ERV316A3_15q26.2a	0	0	0	0	0	0	0	0	1	0	0	0	0	0	0	0	0	0	0	0	0	0	0	0	0	0	0	0	0	0	0	5	0	0	0	0	0	0	0	0	0	0	0	0	0	0	0	0	0
ERV316A3_15q26.2b	0	1	0	0	0	0	0	0	0	0	0	0	0	0	0	0	0	0	1	0	0	0	1	1	0	0	1	0	0	3	0	10	0	0	0	0	1	0	0	2	0	0	0	0	0	0	1	1	0
ERV316A3_15q26.2c	1	0	1	0	0	0	2	18	2	0	0	1	0	51	0	0	1	0	3	0	0	2	4	2	0	0	0	0	0	0	0	14	0	0	0	0	0	0	0	3	0	0	0	0	20	1	2	6	3
ERV316A3_15q26.2d	0	0	0	0	0	0	0	0	1	0	0	0	0	3	0	0	0	0	0	0	0	0	0	0	0	0	1	0	0	0	0	10	0	0	0	0	1	0	0	0	0	0	0	0	0	0	0	1	0
ERV316A3_15q26.3a	0	0	0	2	0	0	0	0	0	1	0	1	0	8	1	0	0	2	5	2	0	0	5	0	1	0	0	0	0	1	5	24	1	0	8	0	1	0	11	2	2	1	0	1	1	0	1	9	4
ERV316A3_15q26.3b	0	0	0	0	0	0	0	0	0	0	0	0	0	0	0	0	0	0	0	0	0	0	1	0	0	0	1	0	0	1	0	27	0	0	0	0	0	0	0	0	0	0	0	0	0	0	0	0	0
ERV316A3_15q26.3c	0	1	0	0	0	0	0	0	0	0	0	0	0	0	0	0	0	0	0	0	0	0	0	2	0	0	0	0	3	0	0	32	2	0	0	0	0	0	0	0	0	0	0	0	0	0	0	0	0
ERV316A3_16p11.2a	0	0	0	0	0	0	0	0	0	0	0	0	0	0	0	0	0	0	0	0	0	0	0	0	0	0	0	0	0	0	0	63	0	0	0	0	0	0	0	0	0	0	0	0	0	0	0	0	0
ERV316A3_16p11.2b	0	0	0	0	0	0	0	0	0	0	0	0	0	0	0	0	0	0	0	0	0	0	0	0	0	0	0	0	0	0	0	13	0	0	0	0	0	0	0	0	0	0	0	0	0	0	0	0	0
ERV316A3_16p12.1	0	0	0	2	0	0	3	0	0	0	0	0	0	5	0	0	0	1	1	0	17	0	2	0	0	4	0	0	17	7	0	4	50	0	1	0	0	1	0	0	1	0	1	0	21	3	1	5	0
ERV316A3_16p12.3	0	0	0	0	0	0	0	0	0	0	0	0	0	0	0	0	0	0	0	0	0	0	1	1	0	0	0	0	0	0	1	13	0	0	0	0	0	0	0	0	0	0	0	0	0	0	0	2	0
ERV316A3_16q12.1a	0	0	0	1	0	0	0	0	0	0	0	0	0	0	0	0	0	0	0	0	0	0	4	0	1	0	0	0	0	0	0	51	0	0	0	0	0	0	0	1	0	0	0	0	1	0	0	2	0
ERV316A3_16q12.1b	0	0	0	0	5	0	0	0	0	0	0	0	0	0	0	0	0	0	0	0	0	0	0	0	0	0	2	0	0	1	2	40	1	0	0	0	0	0	0	0	0	0	0	1	0	0	0	0	0
ERV316A3_16q12.2a	0	0	0	0	0	0	0	0	0	0	0	0	0	0	0	0	0	0	0	0	0	0	1	0	0	0	0	0	0	0	0	32	0	0	0	0	0	0	0	0	0	0	0	0	0	0	0	0	0
ERV316A3_16q12.2b	0	0	0	0	1	0	0	0	0	0	0	0	0	0	0	0	0	0	0	0	0	0	0	0	0	0	0	0	0	0	0	23	0	0	0	0	0	0	0	0	0	0	0	0	0	0	1	0	0
ERV316A3_16q12.2c	0	1	0	0	0	0	0	0	0	0	0	0	0	0	0	0	0	0	0	0	0	0	1	0	0	0	0	0	0	0	0	10	0	0	0	0	0	0	0	0	0	0	0	0	0	0	0	0	0
ERV316A3_16q12.2d	0	0	0	0	0	0	0	0	0	0	0	0	0	0	0	0	0	0	0	0	0	0	4	0	0	0	0	0	0	0	0	11	0	0	0	0	0	0	0	0	0	0	0	0	0	0	0	0	0
ERV316A3_16q12.2e	0	0	0	0	0	0	0	0	0	0	0	0	0	0	0	0	0	0	0	0	0	0	0	0	0	0	0	0	0	0	0	13	0	0	0	0	0	0	0	0	0	0	0	1	0	0	0	0	0
ERV316A3_16q21a	0	0	0	0	0	0	0	0	0	0	0	0	0	0	0	0	0	0	0	0	0	0	0	0	0	0	0	0	0	0	2	12	1	0	0	0	0	0	0	0	0	0	0	0	1	0	0	0	0
ERV316A3_16q21b	0	0	0	0	0	0	0	0	0	0	0	0	0	0	0	0	0	0	0	0	0	0	0	0	0	0	0	0	0	0	0	7	0	0	0	0	0	0	0	0	0	0	0	0	0	0	0	0	0
ERV316A3_16q21c	0	0	0	0	0	0	0	0	0	0	0	0	0	0	0	0	0	0	0	0	0	0	0	0	0	0	0	0	0	0	0	12	0	0	0	0	0	0	0	0	0	0	0	0	0	0	0	0	0
ERV316A3_16q21d	0	0	0	0	0	0	0	0	0	0	0	0	0	0	0	0	0	0	0	0	0	0	0	0	0	0	0	0	0	0	0	10	0	0	0	0	0	0	0	0	0	0	0	0	0	0	0	0	0
ERV316A3_16q21e	0	0	0	0	0	0	0	0	0	0	0	0	0	0	0	0	0	0	0	0	0	0	0	0	0	0	0	0	0	0	0	30	0	0	0	0	0	0	0	0	0	0	0	0	0	0	0	0	0
ERV316A3_16q21f	0	0	0	6	1	1	0	3	0	0	0	0	0	0	0	0	0	0	0	0	6	2	1	0	0	0	0	0	0	6	2	40	1	0	0	0	0	0	0	0	4	0	5	0	0	0	0	0	0
ERV316A3_16q21g	0	0	0	0	0	0	0	0	0	0	0	0	0	0	0	0	0	0	0	0	0	0	0	0	0	0	0	0	0	0	0	20	0	0	0	0	0	0	0	0	0	0	0	0	0	0	0	0	0
ERV316A3_16q21h	0	0	0	0	0	0	0	0	0	0	0	0	0	0	0	0	0	0	0	0	0	0	0	0	0	0	0	0	0	0	0	33	1	0	0	0	0	0	0	0	0	0	0	0	0	0	0	0	0
ERV316A3_16q21i	0	0	0	0	0	0	0	0	0	0	0	0	0	0	0	0	0	0	0	0	0	1	0	0	0	0	0	0	0	0	0	15	0	0	0	0	0	0	0	0	0	0	0	0	0	0	0	0	0
ERV316A3_16q21j	2	1	3	0	0	1	1	2	0	0	0	0	0	6	1	0	0	0	0	1	1	1	2	1	0	2	0	1	0	4	0	36	4	0	0	0	0	0	3	0	0	0	0	0	0	0	2	0	0
ERV316A3_16q21k	0	0	0	0	0	0	0	0	0	0	0	0	0	0	0	0	0	0	0	0	0	0	1	0	0	0	0	0	0	0	0	6	0	0	0	0	0	0	0	0	0	0	0	0	0	0	0	0	0
ERV316A3_16q21l	0	0	0	0	0	0	0	0	0	0	0	0	0	0	0	0	0	0	0	0	0	0	0	0	0	0	0	0	0	0	0	37	0	0	0	0	0	0	0	0	0	0	1	0	0	0	0	1	0
ERV316A3_16q22.2	0	0	0	2	2	2	2	0	0	0	0	0	0	4	0	2	3	3	0	0	2	1	1	2	0	0	1	0	8	2	1	13	10	0	0	0	0	0	1	1	3	0	1	0	3	0	2	0	0
ERV316A3_16q23.1a	0	0	1	2	0	0	2	1	1	2	0	1	0	0	2	0	1	2	1	1	1	1	0	0	3	0	1	0	5	1	2	30	3	3	2	1	2	4	1	2	3	0	1	1	1	2	0	1	1
ERV316A3_16q23.1b	0	0	0	0	0	0	0	1	0	0	0	0	0	0	0	0	0	0	0	0	0	0	1	0	0	0	2	0	0	0	1	29	3	0	0	0	0	0	0	0	0	0	0	0	0	0	0	0	0
ERV316A3_16q24.1	0	0	0	0	0	0	0	0	0	0	0	0	0	0	0	0	0	0	0	3	0	0	0	0	0	0	0	0	0	0	2	13	0	0	0	0	0	0	0	0	0	0	0	0	0	0	0	0	0
ERV316A3_17p11.2a	0	2	1	0	0	0	0	0	0	0	0	0	0	0	0	0	1	0	0	0	0	0	0	0	0	0	0	1	0	0	0	65	0	0	0	0	0	0	0	0	1	0	0	1	0	0	0	0	0
ERV316A3_17p11.2b	0	4	0	0	3	0	1	2	0	0	0	0	0	12	2	0	3	0	0	0	0	0	5	6	0	0	0	4	1	2	1	14	1	0	1	0	0	0	1	2	0	0	1	0	1	0	2	3	1
ERV316A3_17p12a	0	0	3	0	1	0	0	0	0	0	0	0	0	0	1	0	0	1	0	0	0	0	3	0	0	0	0	0	0	1	0	66	1	0	0	0	0	0	0	0	0	0	0	0	0	0	0	0	0
ERV316A3_17p12b	0	0	0	0	0	0	0	0	0	0	0	0	0	0	0	0	0	0	0	0	0	0	0	0	0	0	0	0	0	0	0	33	1	0	0	0	0	0	0	0	0	0	0	0	0	0	0	0	0
ERV316A3_17q12a	0	0	1	0	0	0	0	0	0	0	0	0	0	0	0	0	0	0	0	0	0	0	1	0	0	0	0	0	0	0	0	20	0	0	0	0	0	0	0	0	0	0	0	0	0	0	0	0	0
ERV316A3_17q12b	0	0	0	0	0	0	0	0	0	0	0	0	0	0	0	0	0	0	0	0	0	0	0	0	0	0	0	0	0	0	0	9	0	0	0	0	0	0	0	0	0	0	0	0	0	0	0	0	0
ERV316A3_17q12c	0	0	0	0	1	0	1	0	0	1	0	0	0	0	0	0	0	0	0	0	0	0	0	0	0	0	0	0	1	0	0	41	0	0	0	0	0	0	0	0	0	0	0	0	0	0	0	0	0
ERV316A3_17q12d	9	23	28	19	12	8	6	30	10	45	3	17	12	13	19	13	7	27	34	11	37	11	21	37	30	8	5	23	6	42	31	45	16	16	4	16	4	6	9	18	21	23	56	5	13	6	5	5	20
ERV316A3_17q12e	0	0	0	0	0	0	1	0	0	0	0	0	0	0	0	0	0	0	0	0	0	0	1	0	0	0	0	0	0	0	0	16	0	0	0	0	0	0	0	0	0	0	0	0	0	0	0	0	0
ERV316A3_17q21.2	0	0	0	0	0	0	0	0	0	0	0	0	0	0	0	0	0	0	0	0	0	0	0	0	0	0	0	0	0	0	0	25	0	0	0	0	0	0	0	0	0	0	0	0	0	0	0	0	0
ERV316A3_17q21.31	0	0	0	0	0	0	0	0	0	0	0	0	0	0	0	0	0	0	0	0	0	0	1	0	0	0	0	0	0	0	0	71	0	0	0	0	0	0	0	0	0	0	0	0	0	0	0	0	0
ERV316A3_17q21.32	0	0	2	1	1	0	3	0	0	1	0	0	0	1	0	0	0	0	0	0	0	0	1	1	0	0	0	1	1	0	2	35	0	0	0	0	0	0	0	0	0	0	0	2	0	0	1	0	0
ERV316A3_17q21.33a	0	3	0	0	0	0	1	1	0	0	0	0	0	2	0	0	1	1	0	0	0	0	1	0	0	0	1	0	0	0	0	12	2	2	0	0	1	0	0	0	0	2	0	0	1	0	1	4	0
ERV316A3_17q21.33b	0	1	0	0	1	0	0	0	0	1	0	0	0	3	1	0	0	1	0	0	0	0	0	0	0	0	0	0	3	0	1	21	4	0	0	0	0	0	0	0	0	0	1	0	2	0	2	1	0
ERV316A3_17q21.33c	0	1	0	0	1	0	0	0	0	3	0	0	0	0	0	0	0	0	0	0	0	0	0	0	0	0	0	0	0	0	0	13	3	0	0	0	0	0	0	0	0	0	0	0	0	0	0	0	0
ERV316A3_17q22a	0	0	0	0	0	0	0	0	0	0	0	0	0	0	0	0	0	0	0	0	0	0	2	0	0	0	0	0	0	0	0	9	0	0	0	0	0	0	0	0	0	0	0	0	0	0	0	0	0
ERV316A3_17q22b	0	0	0	0	0	0	0	0	0	0	0	0	0	0	0	0	0	0	0	0	0	0	1	0	0	0	0	0	0	0	0	11	0	0	0	0	0	0	0	0	0	0	0	0	0	0	0	0	0
ERV316A3_17q22c	1	0	0	0	0	0	0	0	0	0	0	0	0	0	0	0	0	0	0	0	0	0	0	0	0	0	1	0	0	0	1	29	0	0	0	0	0	0	0	0	0	0	0	0	0	0	0	0	0
ERV316A3_17q22d	0	0	0	0	0	0	0	0	0	0	0	0	0	0	0	0	0	0	0	0	0	0	0	0	0	0	0	0	4	0	0	19	0	0	0	0	0	0	0	0	0	0	0	0	0	0	0	0	0
ERV316A3_17q23.1	0	1	0	0	0	0	0	0	0	6	0	0	0	0	0	0	0	0	0	0	0	0	1	0	1	0	0	0	1	0	0	26	0	0	0	0	0	0	0	0	0	0	0	0	0	0	2	3	0
ERV316A3_17q23.2a	0	0	0	0	0	0	0	0	1	0	0	0	0	2	0	0	0	0	0	0	0	0	1	0	0	0	0	0	0	0	0	48	0	0	0	0	0	0	0	0	0	0	0	0	0	0	0	0	0
ERV316A3_17q23.2b	0	0	0	0	0	0	0	0	0	0	0	0	0	0	0	0	0	0	0	0	0	0	0	0	0	0	0	0	0	0	0	10	0	0	0	0	0	0	0	0	0	0	0	0	0	0	0	0	0
ERV316A3_17q24.2a	0	0	0	0	0	0	0	0	0	0	0	0	0	0	0	0	0	0	0	0	0	0	1	0	0	0	0	0	0	0	0	17	0	0	0	0	0	0	0	0	0	0	0	0	0	0	0	0	0
ERV316A3_17q24.2b	1	0	1	0	0	0	0	0	0	1	0	0	0	0	0	1	0	1	0	0	0	0	0	0	1	0	1	0	0	0	0	14	0	0	0	0	0	1	0	2	0	0	0	0	1	0	0	0	0
ERV316A3_17q24.2c	0	0	0	0	0	0	0	0	0	0	0	0	0	0	0	0	0	0	0	0	0	0	1	0	0	0	0	0	0	0	0	8	0	0	0	0	0	0	0	0	0	0	0	0	0	0	0	0	0
ERV316A3_17q24.3a	1	4	3	1	6	2	0	3	0	2	0	1	0	23	6	0	3	6	1	3	5	2	4	3	1	1	0	0	1	7	2	21	1	1	3	2	1	0	5	0	0	2	4	0	2	0	0	3	1
ERV316A3_17q24.3b	0	0	0	0	0	0	0	0	0	0	0	0	0	0	0	0	0	0	0	0	0	0	0	0	0	0	0	0	0	0	0	4	0	0	0	0	0	0	0	0	0	0	0	0	0	0	0	0	0
ERV316A3_17q24.3c	0	0	0	0	0	0	0	0	0	0	0	0	0	0	0	0	0	0	0	0	0	0	0	0	0	0	0	0	0	0	0	13	0	0	0	0	0	0	0	0	0	0	0	0	0	0	0	0	0
ERV316A3_17q24.3d	0	0	0	0	0	0	0	0	0	0	0	0	0	0	0	0	0	0	0	0	0	0	0	0	0	0	0	0	0	0	0	22	0	0	0	0	0	0	0	0	0	0	0	0	0	0	0	0	0
ERV316A3_17q24.3e	0	0	0	0	0	0	0	0	0	0	0	0	0	0	0	0	0	0	0	0	0	0	0	0	0	0	0	0	0	0	0	11	0	0	0	0	0	0	0	0	0	0	0	0	0	0	0	0	0
ERV316A3_17q24.3f	0	0	0	0	0	0	0	0	0	0	1	0	0	0	0	0	0	0	0	0	0	0	0	0	0	0	0	0	0	0	0	16	0	0	0	0	0	0	0	0	0	0	0	0	0	0	0	0	0
ERV316A3_17q24.3g	2	0	0	0	1	0	0	1	0	0	0	0	0	0	0	0	0	0	0	1	0	0	0	0	0	0	0	0	1	1	0	40	0	0	0	0	0	0	0	0	0	0	0	0	0	0	0	0	0
ERV316A3_17q25.3a	0	0	0	0	0	0	0	0	0	0	0	1	0	0	0	0	0	0	0	0	0	0	0	0	0	0	0	0	1	0	0	22	0	0	1	0	0	0	1	0	0	0	0	0	2	0	0	0	0
ERV316A3_17q25.3b	0	0	0	0	0	0	0	0	0	1	0	0	0	1	0	0	0	0	0	1	1	0	0	0	2	0	0	0	0	0	1	17	0	0	3	0	1	0	0	0	0	0	0	0	4	0	2	0	0
ERV316A3_18p11.21a	0	0	0	0	0	0	0	0	0	0	0	0	0	0	0	0	0	0	0	0	0	0	0	0	0	0	0	0	0	0	0	8	0	0	0	0	0	0	0	0	0	0	0	0	0	0	0	0	0
ERV316A3_18p11.21b	0	0	0	0	0	0	0	0	0	0	0	0	0	0	0	0	0	0	0	0	0	0	0	0	0	0	0	0	0	0	0	31	0	0	0	0	0	0	0	0	0	0	0	0	0	0	0	0	0
ERV316A3_18p11.21c	0	0	0	0	0	0	0	0	0	0	0	0	0	0	0	0	0	0	0	0	0	0	0	0	0	0	0	0	0	0	0	33	0	0	0	0	0	0	0	0	0	0	0	0	0	0	0	0	0
ERV316A3_18p11.22a	0	0	0	0	0	0	0	0	0	0	0	0	0	0	0	0	0	0	0	0	0	0	0	0	0	0	1	0	0	0	0	20	0	0	0	0	0	0	0	0	0	0	0	0	0	0	0	1	0
ERV316A3_18p11.22b	0	0	0	0	0	0	0	0	0	0	0	0	0	0	0	0	0	0	0	0	0	0	0	0	0	0	0	0	0	0	1	12	0	0	1	0	0	0	0	0	0	0	0	0	1	0	0	0	0
ERV316A3_18p11.22c	0	0	0	0	0	0	1	0	0	0	0	0	0	0	0	0	0	0	0	0	0	0	0	0	0	0	1	0	1	0	0	4	0	0	0	0	0	0	0	0	1	0	0	0	0	0	0	0	0
ERV316A3_18p11.31a	0	0	0	1	0	0	1	0	0	0	0	0	0	5	0	0	0	0	0	0	0	0	3	0	0	0	0	0	0	0	5	37	0	0	0	0	0	0	0	0	0	0	0	0	0	0	0	0	1
ERV316A3_18p11.31b	0	0	0	0	0	0	0	0	0	0	0	0	0	0	0	0	0	0	0	0	0	0	0	0	0	0	0	0	0	0	0	12	0	0	0	0	0	0	1	0	0	0	1	0	0	0	0	0	0
ERV316A3_18p11.31c	0	0	0	0	0	0	0	0	0	0	0	0	0	0	0	0	0	0	0	0	0	0	1	0	0	0	0	0	0	0	0	17	0	0	0	0	0	0	0	0	0	0	0	0	0	0	0	0	0
ERV316A3_18p11.31d	0	0	0	0	0	0	0	0	0	0	0	0	0	0	0	0	0	0	0	0	0	0	1	0	1	0	0	0	0	1	0	21	0	0	0	0	0	0	0	0	0	0	0	0	0	0	0	0	1
ERV316A3_18p11.32a	0	0	0	0	0	0	0	0	0	0	0	0	0	0	0	0	0	0	0	0	0	0	0	0	0	0	0	0	1	0	0	12	0	0	0	0	0	0	0	0	0	0	0	0	0	0	0	0	0
ERV316A3_18p11.32b	0	0	0	0	0	0	0	0	0	0	0	0	0	0	0	0	0	0	0	0	0	0	0	0	0	0	0	0	0	0	0	13	0	0	0	0	0	0	0	0	0	0	0	0	0	0	0	0	0
ERV316A3_18p11.32c	1	0	0	3	3	4	0	0	0	0	0	2	0	30	1	0	0	0	0	2	11	2	1	2	5	0	18	6	2	2	53	40	3	1	1	1	0	3	1	0	5	0	1	4	0	2	4	13	0
ERV316A3_18p11.32d	0	0	0	0	0	0	0	0	0	0	0	0	0	0	0	0	0	0	0	1	0	0	0	0	0	0	0	0	0	0	0	40	0	0	0	0	0	0	0	0	0	0	0	0	0	0	0	0	0
ERV316A3_18q11.1	0	0	0	0	0	0	0	0	0	0	0	0	0	0	0	0	0	0	0	0	0	0	0	0	0	0	0	0	0	0	0	17	0	0	0	0	0	0	0	0	0	0	0	0	0	0	0	0	0
ERV316A3_18q11.2a	0	0	0	0	1	0	0	0	0	0	0	0	0	0	0	0	0	2	1	1	0	0	1	0	0	0	0	0	0	0	2	23	0	0	0	0	0	0	0	0	0	0	0	0	0	0	1	0	0
ERV316A3_18q11.2b	0	0	0	0	1	2	1	0	0	2	0	0	0	0	0	0	0	0	0	0	2	0	2	1	1	0	0	0	1	2	1	2	0	0	0	0	0	0	1	0	0	0	0	0	1	0	0	0	0
ERV316A3_18q11.2c	4	7	58	10	84	310	167	8	15	75	2	7	125	101	70	35	82	96	22	67	77	86	62	79	65	0	7	1	20	133	226	16	15	49	6	36	7	36	14	21	19	2	45	47	18	4	85	42	46
ERV316A3_18q11.2d	0	0	0	0	0	0	0	0	0	0	0	0	0	0	0	0	0	0	0	0	0	0	0	0	0	0	0	0	0	0	1	10	0	0	0	0	0	0	0	0	0	0	0	0	0	0	0	0	0
ERV316A3_18q11.2e	0	0	0	0	0	0	0	0	0	0	0	0	0	0	0	0	0	0	0	0	0	0	2	0	0	0	0	0	0	0	0	39	0	0	0	0	0	0	0	0	0	0	0	0	0	0	0	0	0
ERV316A3_18q11.2f	0	0	0	0	0	0	0	1	0	1	0	0	0	9	1	0	0	0	0	0	0	0	0	0	0	0	0	0	1	0	5	12	2	0	0	0	0	0	0	0	0	0	0	0	0	0	0	0	0
ERV316A3_18q11.2g	0	0	0	0	0	0	0	0	0	0	0	0	0	0	0	0	0	0	0	0	0	0	0	0	0	0	0	0	0	0	0	11	0	0	0	0	0	0	0	1	0	0	0	0	0	0	1	0	0
ERV316A3_18q12.1a	0	0	0	0	0	0	0	0	0	0	0	0	0	0	0	0	0	0	0	0	0	0	0	0	0	0	0	0	0	0	0	19	0	0	0	0	0	0	0	0	0	0	0	0	0	0	0	0	0
ERV316A3_18q12.1b	0	0	0	0	0	0	0	0	0	0	0	0	0	1	0	0	0	0	0	0	0	0	1	0	0	0	0	0	3	0	10	52	1	0	0	0	0	0	0	0	0	0	0	1	0	9	0	0	0
ERV316A3_18q12.1c	0	0	0	0	0	0	0	0	0	0	0	0	0	0	0	0	0	0	0	0	0	0	0	0	0	0	0	0	0	0	0	17	0	0	0	0	0	0	0	0	0	0	0	0	0	0	0	0	0
ERV316A3_18q12.1d	0	0	0	0	0	0	0	0	0	0	0	0	0	0	0	0	0	0	0	0	0	0	0	0	0	0	0	0	0	0	0	7	0	0	0	0	0	0	0	0	0	0	0	0	0	0	0	0	0
ERV316A3_18q12.1e	0	0	0	0	0	0	0	0	0	0	0	0	0	0	0	0	0	0	0	0	0	0	0	0	0	0	0	0	0	0	0	9	0	0	0	0	0	0	0	0	0	0	0	0	0	0	0	0	0
ERV316A3_18q12.1f	0	0	0	0	0	0	0	0	0	0	0	0	0	0	0	0	0	0	0	0	0	0	0	0	0	0	0	0	0	0	0	9	0	0	0	0	0	0	0	0	0	0	0	0	0	0	0	0	0
ERV316A3_18q12.1g	0	0	0	0	0	0	0	0	0	0	0	0	0	0	0	0	0	0	0	0	0	0	0	0	0	0	0	0	0	0	0	18	0	0	0	0	0	0	0	0	0	0	0	0	0	0	0	0	0
ERV316A3_18q12.2	0	0	0	0	0	0	0	0	0	0	0	0	0	0	0	0	0	0	0	0	0	0	0	0	0	0	0	0	0	0	0	7	0	0	0	0	0	0	0	0	0	0	0	0	0	0	0	0	0
ERV316A3_18q12.3a	0	1	0	0	0	0	2	2	1	0	0	9	0	6	0	0	0	0	0	3	18	4	2	0	3	0	0	3	0	5	9	30	0	0	0	0	0	1	1	0	0	0	1	1	0	0	0	1	0
ERV316A3_18q12.3b	0	0	0	0	2	0	0	0	0	0	0	0	0	0	0	0	0	0	0	0	0	0	0	0	0	0	0	0	0	0	0	4	0	0	0	0	0	0	0	0	0	0	0	0	0	0	0	0	0
ERV316A3_18q21.1a	8	3	1	1	7	3	2	5	2	6	0	2	0	25	7	1	0	0	1	3	6	3	2	2	1	2	1	2	6	3	1	38	7	2	2	0	2	7	4	1	4	3	1	3	5	1	2	5	3
ERV316A3_18q21.1b	0	5	0	1	3	0	2	0	1	0	0	1	0	15	0	0	0	0	3	3	0	1	0	1	2	0	1	2	4	9	11	39	6	2	1	0	5	2	1	0	3	0	3	0	7	0	0	10	1
ERV316A3_18q21.2	0	0	0	0	0	0	0	0	0	0	0	1	0	0	0	0	0	0	0	0	0	0	0	0	0	0	0	0	0	0	0	18	0	0	0	0	0	0	0	0	0	0	0	0	0	0	0	0	0
ERV316A3_18q21.31	0	0	0	0	0	0	0	0	0	0	0	0	0	0	0	0	0	0	0	0	0	0	0	0	0	0	0	0	0	0	0	18	0	0	0	0	0	0	0	0	0	0	0	0	0	0	0	0	0
ERV316A3_18q21.32	0	0	0	0	0	0	0	0	0	0	0	0	0	0	0	0	0	0	0	0	0	0	0	0	0	0	0	0	0	0	0	14	0	0	0	0	0	0	0	0	0	0	0	0	0	0	0	0	0
ERV316A3_18q22.1a	0	0	0	0	0	0	0	0	0	0	0	0	0	0	1	0	0	0	0	0	0	0	1	0	0	0	0	0	0	0	0	19	0	0	0	0	0	0	0	0	0	0	0	0	0	0	0	0	0
ERV316A3_18q22.1b	0	0	0	0	0	0	0	0	0	0	0	0	0	0	0	0	0	0	0	0	0	0	0	0	0	0	0	0	0	0	0	26	0	0	0	0	0	0	0	0	0	0	0	0	0	0	0	0	0
ERV316A3_18q22.1c	0	0	0	0	0	0	0	0	0	0	0	0	0	0	0	0	0	0	0	0	0	0	1	0	0	0	0	0	0	0	0	17	1	0	0	0	0	0	0	0	0	0	0	0	0	0	0	0	0
ERV316A3_18q22.1d	0	0	0	0	2	0	0	0	0	0	0	0	0	1	0	0	0	0	0	0	0	0	0	0	0	0	0	0	0	0	0	8	0	0	0	0	0	1	0	0	0	0	0	0	0	0	0	0	0
ERV316A3_18q22.1e	0	0	0	0	0	0	0	0	0	0	0	0	0	0	0	0	0	0	0	0	0	0	0	0	0	0	0	0	0	0	0	8	0	0	0	1	0	0	0	0	0	0	0	1	0	0	0	0	0
ERV316A3_18q22.1f	0	0	0	0	0	0	0	0	0	0	0	0	0	0	0	0	0	0	0	0	0	0	0	0	0	0	0	0	0	0	0	10	0	0	0	0	0	0	0	0	0	0	0	0	0	0	0	0	0
ERV316A3_18q22.1g	0	0	0	0	0	0	0	0	0	0	0	0	0	0	0	0	0	0	0	0	0	0	0	0	0	0	0	0	0	0	0	18	0	0	0	0	0	1	0	0	0	0	0	0	0	0	0	0	0
ERV316A3_18q22.1h	0	0	0	0	0	1	0	0	0	0	0	0	0	1	0	0	0	0	0	0	0	0	1	0	0	0	0	0	0	0	0	20	0	0	0	0	0	1	0	0	0	0	0	0	0	0	0	0	0
ERV316A3_18q22.1i	0	0	0	0	0	0	0	0	0	0	0	0	0	0	0	0	0	0	0	0	0	0	0	0	0	0	0	0	0	0	0	10	0	0	0	0	0	0	0	0	0	0	0	0	0	0	0	0	0
ERV316A3_18q22.1j	0	0	0	0	0	0	0	0	0	0	0	0	0	0	0	0	0	0	0	0	0	0	0	0	0	0	0	0	0	0	0	19	0	0	0	0	0	0	0	0	0	0	0	0	0	0	0	0	0
ERV316A3_18q22.1k	0	0	0	0	0	0	0	0	0	0	0	0	0	6	0	0	0	0	0	0	0	0	0	0	0	0	0	0	0	0	0	24	0	0	0	0	0	0	0	0	0	0	0	0	0	0	0	0	0
ERV316A3_18q22.1l	0	0	1	0	0	0	0	0	0	0	0	0	0	8	0	0	0	0	0	0	0	3	1	1	1	0	0	0	0	0	0	29	1	0	0	0	0	0	0	0	0	0	0	0	0	0	0	0	0
ERV316A3_18q22.1m	0	0	0	0	0	0	0	0	0	0	0	0	0	4	0	0	0	0	0	0	0	0	0	0	0	0	0	0	0	0	0	41	0	0	0	0	0	0	0	0	0	0	0	0	0	0	0	0	0
ERV316A3_18q22.1n	0	0	0	0	0	0	0	0	0	0	0	0	0	8	0	0	0	0	0	0	0	0	0	1	0	0	0	0	0	0	0	23	0	0	0	0	0	0	8	0	0	0	0	0	0	0	0	0	0
ERV316A3_18q22.1o	0	0	0	2	1	0	0	0	0	0	0	0	0	0	0	0	0	0	0	0	0	0	2	0	0	0	0	0	0	0	0	20	3	0	0	0	0	0	0	0	0	0	0	0	0	0	0	0	0
ERV316A3_18q22.3a	0	0	0	0	0	0	0	0	0	0	0	0	0	0	0	0	0	0	0	0	0	0	0	0	0	0	0	0	0	0	0	7	0	0	0	0	0	0	0	0	0	0	0	0	0	0	0	0	0
ERV316A3_18q22.3b	0	0	0	0	0	0	0	0	0	0	0	0	0	0	0	0	0	0	0	0	0	0	0	0	0	0	0	0	0	0	0	14	0	0	0	0	0	0	0	0	0	0	0	0	0	0	0	0	0
ERV316A3_18q22.3c	0	0	0	2	0	0	0	1	0	0	0	1	0	0	0	0	0	0	0	1	0	0	2	1	2	0	0	0	1	1	0	12	0	0	0	0	0	0	0	0	1	0	0	0	0	0	0	0	0
ERV316A3_18q22.3d	0	0	0	0	0	0	0	0	0	0	0	0	0	0	0	0	0	0	0	0	0	0	0	0	0	0	0	0	0	0	0	23	0	0	0	0	0	0	0	0	0	0	0	0	0	0	0	0	0
ERV316A3_18q22.3e	5	52	17	13	14	8	12	20	7	37	0	4	1	235	21	2	32	43	26	22	25	39	41	38	18	47	11	13	57	71	27	28	70	7	8	5	32	13	49	12	26	18	24	10	25	0	35	278	7
ERV316A3_18q23	0	0	0	0	0	0	0	2	0	0	0	2	0	0	0	0	1	0	0	0	2	0	0	0	0	0	0	0	0	0	0	5	4	1	0	0	0	0	0	0	0	0	0	0	0	0	0	0	0
ERV316A3_19p13.3	0	0	0	0	0	0	0	0	0	0	0	0	0	0	0	0	0	0	0	0	0	0	0	0	0	0	0	0	0	0	0	0	0	0	0	0	0	0	0	0	0	0	0	0	0	0	0	0	0
ERV316A3_19q12a	0	0	0	1	0	0	0	0	0	0	0	0	0	0	0	0	0	0	0	0	0	0	0	0	0	0	0	0	0	0	0	22	0	0	0	0	0	0	0	0	0	0	0	0	0	0	0	2	0
ERV316A3_19q12b	0	0	0	0	0	0	0	0	0	0	0	0	0	0	0	0	0	0	0	0	0	0	0	0	0	0	0	0	0	0	0	13	0	0	0	0	0	0	0	0	0	1	0	0	0	0	0	0	0
ERV316A3_19q12c	0	0	0	0	0	0	0	0	0	0	0	0	0	0	0	0	0	0	0	0	0	0	0	0	0	0	0	0	0	0	0	16	0	0	0	0	0	0	0	0	0	0	0	0	0	0	0	0	0
ERV316A3_19q12d	0	0	0	0	0	0	0	0	0	0	0	0	0	0	0	0	0	0	0	0	0	0	0	0	0	0	0	0	0	0	0	15	0	0	0	0	0	0	0	0	0	0	0	0	0	0	0	0	0
ERV316A3_19q12e	0	0	0	0	0	0	0	0	0	0	0	0	0	0	0	0	0	0	1	0	0	0	1	0	0	0	0	0	0	0	1	63	0	0	0	0	0	0	0	0	0	0	0	0	0	0	0	0	0
ERV316A3_19q12f	0	0	0	0	0	0	0	0	0	0	0	0	0	0	0	0	0	0	0	0	0	0	1	0	0	0	0	0	0	0	0	15	0	0	0	0	0	0	0	0	0	0	0	0	0	0	0	0	0
ERV316A3_19q13.11a	0	0	0	0	0	0	0	0	0	0	0	0	0	0	0	0	0	0	0	0	0	0	2	0	0	0	0	0	0	0	0	25	0	0	0	0	0	0	0	0	0	0	0	0	0	0	0	0	0
ERV316A3_19q13.11b	0	0	0	0	0	0	0	0	0	0	0	0	0	1	0	0	0	0	0	2	0	0	1	0	3	1	2	0	0	0	0	30	3	0	0	0	0	0	2	1	0	0	0	0	0	0	0	1	0
ERV316A3_19q13.2	22	11	5	5	4	2	6	16	4	3	0	0	3	1	8	4	1	8	4	6	6	6	23	44	7	5	5	3	2	14	9	33	4	23	8	12	1	16	12	26	26	22	9	6	18	11	14	6	99
ERV316A3_19q13.31	0	0	0	4	2	1	0	3	0	0	0	0	0	1	0	0	0	2	5	0	0	0	6	2	0	2	1	5	12	7	2	43	21	0	0	1	2	0	0	1	0	0	7	0	12	0	1	0	0
ERV316A3_19q13.42	0	0	0	0	0	1	0	0	0	0	0	0	0	1	0	0	0	0	0	0	0	0	1	0	0	0	0	0	0	0	0	13	0	0	0	0	0	1	0	0	0	0	0	0	0	0	0	0	0
ERV316A3_1p11.2	0	0	0	0	0	0	0	0	0	0	0	0	0	0	0	0	0	0	0	0	0	0	0	0	0	0	0	0	0	0	0	45	0	0	0	0	0	0	0	0	0	0	0	0	0	0	0	0	0
ERV316A3_1p12	0	0	0	0	0	0	0	0	0	0	0	0	1	2	0	0	1	0	0	0	0	1	0	0	0	0	0	0	0	0	0	16	0	0	0	0	0	0	0	0	0	1	0	0	0	0	0	0	0
ERV316A3_1p13.3a	0	0	0	1	0	0	0	1	0	0	0	1	0	5	1	0	0	2	0	0	0	4	1	1	0	0	0	0	0	1	1	35	1	0	0	0	1	0	0	0	0	1	0	0	0	0	1	0	1
ERV316A3_1p13.3b	0	1	0	0	0	0	0	0	0	0	0	0	0	1	0	0	0	0	0	0	0	0	1	0	1	0	0	0	0	0	0	18	0	0	0	0	0	0	0	0	0	0	0	0	1	0	0	0	0
ERV316A3_1p21.1a	0	0	0	0	1	0	0	0	0	0	0	0	0	0	0	0	0	0	0	0	0	0	2	0	0	1	0	0	0	0	0	25	0	0	0	0	0	0	0	0	0	0	0	0	0	0	0	0	0
ERV316A3_1p21.1b	0	0	0	0	0	0	0	0	0	0	0	0	0	0	0	0	0	0	0	0	0	0	0	0	0	0	0	0	0	0	0	7	0	0	0	0	0	0	0	0	0	0	0	0	0	0	0	0	0
ERV316A3_1p21.1c	4	0	0	4	0	0	0	2	0	0	0	0	0	1	1	0	0	0	0	1	0	1	3	0	0	0	0	0	1	5	0	50	7	0	0	0	0	0	0	0	2	0	4	4	3	0	0	1	0
ERV316A3_1p21.1d	0	0	0	1	0	0	0	0	0	0	0	0	0	0	0	0	0	0	0	0	0	0	2	0	0	1	0	0	1	1	1	11	0	0	0	0	1	0	0	1	0	0	0	0	0	0	0	1	0
ERV316A3_1p21.1e	0	0	0	0	0	0	0	0	0	0	0	0	0	0	0	0	0	0	0	0	0	0	1	0	0	0	0	0	0	0	0	3	0	0	0	0	0	0	0	0	0	0	0	0	0	0	0	0	0
ERV316A3_1p21.1f	0	0	0	0	0	0	0	0	0	0	0	0	0	0	0	0	0	0	0	0	0	0	1	0	0	0	0	0	0	0	0	54	0	0	0	0	0	0	0	0	1	0	0	0	0	0	0	0	0
ERV316A3_1p21.1g	0	0	0	0	0	0	0	0	0	0	0	0	0	0	0	0	0	0	0	0	0	0	0	0	0	0	0	0	1	0	0	13	0	0	0	0	0	0	0	0	0	0	0	0	0	0	0	0	0
ERV316A3_1p21.1h	0	0	0	0	0	0	0	0	0	0	0	0	0	0	0	0	0	0	0	0	0	0	0	0	0	0	0	0	0	0	0	15	0	0	0	0	0	0	0	0	0	0	0	0	0	0	0	0	0
ERV316A3_1p21.1i	0	0	0	0	0	0	0	0	0	0	0	0	0	0	0	0	0	0	0	0	0	0	0	0	0	0	0	0	0	0	0	14	0	0	0	0	0	0	0	0	0	0	0	0	0	0	0	0	0
ERV316A3_1p21.1j	0	0	0	0	0	0	0	0	0	0	0	0	0	0	0	0	0	0	0	0	0	0	0	0	0	0	0	0	0	0	0	7	0	0	0	0	0	0	0	0	0	0	0	0	0	0	0	0	0
ERV316A3_1p21.2a	0	0	0	0	0	0	0	0	0	0	0	0	0	0	0	0	0	0	0	0	0	0	0	0	0	0	0	0	0	0	0	4	0	0	0	0	0	0	0	0	0	0	0	0	0	0	0	0	0
ERV316A3_1p21.2b	0	0	1	0	0	0	0	0	0	0	0	0	0	0	0	0	0	0	0	0	0	0	1	0	0	0	0	0	0	0	1	18	0	0	1	0	0	0	0	0	0	0	0	0	0	0	0	0	0
ERV316A3_1p21.3a	4	3	0	0	0	0	0	1	0	2	0	0	0	0	1	0	0	1	2	2	0	0	7	5	1	1	0	4	0	2	1	18	3	0	1	0	0	0	3	3	0	0	1	2	4	0	0	3	2
ERV316A3_1p21.3b	0	0	0	0	0	0	0	0	0	0	0	0	0	1	0	0	0	0	0	0	0	0	0	0	0	0	0	0	0	0	0	21	0	0	0	0	0	0	0	0	0	0	0	0	0	0	0	0	0
ERV316A3_1p22.1a	0	0	0	0	77	0	0	0	0	1	0	1	0	1	0	0	0	0	0	0	0	0	2	1	2	0	0	0	3	6	0	10	0	0	0	1	0	0	0	2	1	3	1	0	0	0	0	0	0
ERV316A3_1p22.1b	0	0	0	0	1	0	0	0	0	0	0	0	0	0	0	0	0	0	0	0	0	0	0	0	0	0	0	0	0	0	0	7	0	0	0	0	0	0	0	0	0	0	0	0	0	0	0	0	0
ERV316A3_1p22.1c	0	0	0	0	0	0	0	0	0	0	0	0	0	0	0	0	0	0	0	0	0	0	1	0	0	0	0	0	0	0	0	18	0	0	0	0	0	0	0	0	0	0	0	0	0	0	0	0	0
ERV316A3_1p22.2a	0	0	0	0	0	0	1	0	0	0	0	0	0	0	0	0	0	0	0	0	0	2	0	0	0	0	0	0	0	0	0	24	0	0	0	0	0	0	0	0	0	0	0	0	0	0	0	0	0
ERV316A3_1p22.2b	0	0	0	0	0	1	0	0	0	0	0	0	0	0	0	0	0	0	0	0	0	0	1	0	0	0	0	0	0	0	1	15	0	0	0	0	0	0	0	0	0	0	0	0	0	0	0	0	0
ERV316A3_1p22.2c	0	0	0	0	0	0	0	0	0	0	0	0	0	1	0	0	0	0	1	1	0	0	1	0	0	0	0	0	0	0	0	10	0	0	0	0	1	0	0	0	0	0	0	0	0	0	0	0	0
ERV316A3_1p22.2d	0	0	0	0	0	0	0	0	0	0	0	0	0	0	0	0	0	0	0	0	0	0	0	0	0	0	0	0	0	0	0	10	0	0	0	0	0	0	0	0	0	0	0	0	0	0	0	0	0
ERV316A3_1p22.3a	0	0	0	0	0	0	0	0	0	0	0	0	0	0	0	1	0	0	0	0	0	0	3	0	0	0	0	2	0	0	0	28	0	0	0	0	0	0	0	0	0	0	0	0	0	0	0	0	0
ERV316A3_1p22.3b	0	0	0	2	0	0	0	0	0	0	0	0	0	0	0	0	0	0	0	0	0	0	1	0	0	0	0	0	0	0	0	23	0	2	0	0	1	0	0	0	0	0	0	0	1	0	0	0	0
ERV316A3_1p22.3c	0	1	0	28	1	0	0	0	0	2	0	0	0	1	0	0	0	1	0	1	1	1	4	2	2	0	0	3	1	1	1	11	2	0	1	0	0	0	0	0	0	0	0	0	0	0	1	0	6
ERV316A3_1p31.1a	0	0	0	0	0	0	0	0	0	0	0	0	0	0	0	0	0	0	0	0	0	0	0	0	0	0	0	0	0	0	0	32	1	0	0	0	0	0	0	0	0	0	0	0	0	0	0	0	0
ERV316A3_1p31.1b	0	0	0	0	0	0	0	0	0	0	0	0	0	0	0	0	0	0	0	0	0	0	0	1	0	0	0	0	0	0	0	14	0	0	0	0	0	1	0	0	0	0	0	0	0	0	0	0	0
ERV316A3_1p31.1c	0	0	0	0	0	0	0	0	0	0	0	0	0	0	0	0	0	0	0	0	0	0	0	0	0	0	0	0	0	1	0	27	0	1	0	0	0	0	0	0	1	0	1	0	0	0	0	0	0
ERV316A3_1p31.1d	0	0	0	0	0	0	0	0	0	0	0	0	0	0	0	0	0	0	0	0	0	0	1	0	0	0	0	0	0	0	0	28	0	0	0	0	0	0	0	0	0	0	0	0	1	0	0	0	0
ERV316A3_1p31.1e	1	0	0	2	1	0	0	0	0	0	0	0	0	1	0	0	0	0	0	1	0	1	0	0	0	1	0	0	0	0	2	31	0	0	2	0	0	1	0	0	0	0	0	0	0	0	0	0	0
ERV316A3_1p31.1f	0	0	0	0	0	0	0	0	0	0	0	0	0	1	0	0	0	0	0	0	0	0	0	0	0	0	0	0	0	0	0	21	0	0	0	0	0	0	0	0	0	0	0	0	0	0	0	0	0
ERV316A3_1p31.1g	0	1	1	0	1	0	0	2	0	0	0	0	0	5	0	0	0	0	0	0	1	0	1	0	1	0	0	0	1	6	2	30	0	0	0	0	0	0	0	0	0	0	0	0	2	0	0	0	0
ERV316A3_1p31.2	0	0	0	0	0	0	0	0	0	0	0	0	0	2	0	0	0	0	0	1	1	1	1	0	1	0	0	1	0	0	1	4	0	0	0	0	0	0	0	0	0	0	1	0	0	0	0	0	0
ERV316A3_1p31.3a	0	1	2	1	2	0	1	2	0	1	0	2	0	0	3	0	0	9	2	0	3	1	3	8	1	3	0	1	15	8	3	40	4	0	0	0	4	0	0	2	2	2	3	0	7	0	2	1	2
ERV316A3_1p31.3b	0	0	0	0	0	0	0	0	0	0	0	0	0	0	0	0	0	0	0	0	0	0	1	0	0	0	0	0	0	0	1	8	0	0	0	0	0	0	0	0	0	0	0	0	0	0	0	0	0
ERV316A3_1p31.3c	0	0	0	1	1	0	0	0	0	0	0	0	0	0	1	0	0	0	0	2	0	0	1	0	0	0	0	0	0	0	0	15	0	0	0	0	0	1	0	0	0	0	0	0	1	0	0	0	1
ERV316A3_1p31.3d	0	0	0	0	0	0	0	0	0	0	0	0	0	0	0	0	0	0	0	0	0	0	0	0	0	0	0	0	0	0	0	8	0	0	0	0	0	0	0	0	0	0	0	0	0	0	0	0	0
ERV316A3_1p31.3e	0	0	0	0	0	0	0	0	0	1	0	0	0	0	0	0	0	0	0	0	0	0	1	0	0	0	0	0	0	0	0	44	0	0	0	0	0	0	0	0	0	0	0	0	0	0	0	0	0
ERV316A3_1p31.3f	2	2	4	7	2	2	1	6	2	4	0	2	0	41	8	0	0	1	1	3	1	5	11	10	1	3	0	9	7	17	7	32	6	1	4	0	1	0	2	5	16	4	5	3	11	0	6	1	4
ERV316A3_1p31.3g	0	0	0	0	0	0	0	0	0	0	0	0	0	0	0	0	0	0	0	0	0	0	0	1	0	0	0	0	0	0	0	13	0	0	0	0	0	0	0	0	0	0	0	0	0	0	0	0	1
ERV316A3_1p31.3h	0	1	0	0	1	0	0	0	0	0	0	0	0	0	0	0	0	0	0	0	0	0	0	0	0	0	1	0	0	0	0	30	0	0	0	0	0	0	0	0	0	0	0	0	1	0	0	0	0
ERV316A3_1p31.3i	0	0	0	0	0	0	0	0	0	0	0	0	0	0	0	0	0	0	0	0	0	0	2	0	0	0	0	0	0	0	0	28	0	0	0	0	0	0	0	0	0	0	0	2	0	0	0	0	0
ERV316A3_1p32.1a	6	3	2	5	11	4	34	11	2	11	1	7	3	3	6	0	7	9	2	4	7	4	18	7	4	6	1	8	34	41	6	29	3	12	8	0	10	6	2	16	11	4	28	0	33	1	9	14	8
ERV316A3_1p32.1b	0	0	0	0	0	0	0	0	0	0	0	0	0	0	0	0	0	0	0	3	0	0	0	0	0	0	0	0	0	0	0	36	0	0	0	0	0	0	0	0	0	0	0	0	0	0	0	0	0
ERV316A3_1p32.1c	0	2	1	4	9	1	0	1	1	5	0	0	0	9	0	0	2	0	0	5	0	1	1	0	0	6	5	2	12	3	2	25	0	0	1	0	7	2	0	0	2	0	5	0	2	0	4	17	0
ERV316A3_1p32.2a	0	0	0	0	0	1	0	0	0	0	0	0	0	0	0	0	0	0	0	0	0	0	0	0	0	0	0	0	0	0	0	20	0	0	0	0	0	0	0	0	0	0	0	0	2	0	0	0	0
ERV316A3_1p32.2b	0	0	0	0	0	0	0	0	0	0	0	0	0	0	0	0	0	0	0	0	0	0	0	0	0	0	0	0	0	0	0	13	0	0	0	0	0	0	0	0	0	0	0	0	0	0	0	0	0
ERV316A3_1p32.2c	0	0	0	0	0	0	0	0	0	0	0	0	0	0	0	0	0	0	0	0	0	0	0	0	0	0	0	0	0	0	0	13	1	0	0	0	0	0	0	0	0	0	0	0	3	0	0	0	0
ERV316A3_1p32.2d	0	0	0	0	0	0	0	0	0	0	0	0	0	0	0	0	0	0	0	0	0	0	0	0	0	0	0	0	0	0	0	5	0	0	0	0	0	0	0	0	0	0	0	0	0	0	0	0	0
ERV316A3_1p32.2e	3	1	0	3	3	0	0	2	0	1	0	0	0	0	1	0	1	0	0	1	0	0	0	0	0	0	0	1	3	1	3	21	1	0	2	0	0	0	0	0	1	1	0	0	1	0	0	0	0
ERV316A3_1p32.2f	3	4	0	4	5	0	0	2	1	0	1	6	0	2	7	0	2	5	0	5	0	1	8	8	0	2	0	1	5	3	17	12	4	0	4	4	1	0	1	7	1	5	7	1	2	0	1	8	1
ERV316A3_1p32.3a	1	6	1	8	1	2	1	3	0	18	3	4	1	43	7	1	5	4	11	5	14	2	3	2	2	3	2	18	25	6	9	44	1	7	5	5	4	1	6	2	3	5	4	8	1	1	2	15	1
ERV316A3_1p32.3b	51	68	32	110	86	26	65	69	22	113	6	93	30	180	89	20	62	257	83	71	85	46	144	144	62	112	41	269	335	492	163	72	157	42	126	69	45	45	26	104	170	74	200	37	436	59	119	177	88
ERV316A3_1p33	1	0	0	0	1	0	0	0	0	0	0	2	0	0	0	0	0	0	0	0	0	0	2	0	0	0	0	0	0	0	2	60	0	0	0	0	0	0	0	1	2	0	0	0	0	0	0	0	0
ERV316A3_1p34.1a	0	0	0	0	0	0	0	0	0	0	0	0	0	0	0	0	0	0	0	0	2	0	1	0	0	0	0	0	1	0	0	28	0	0	0	0	0	0	0	0	1	0	0	0	0	0	0	0	0
ERV316A3_1p34.1b	0	0	0	0	2	1	0	0	0	4	0	1	0	0	0	0	0	2	0	3	0	0	1	1	0	1	0	1	1	3	0	31	0	0	0	0	0	0	0	2	0	1	0	0	0	0	2	1	0
ERV316A3_1p34.2a	0	0	0	0	1	0	0	0	0	0	0	0	0	1	0	0	1	0	0	1	0	0	0	0	0	0	0	0	3	0	3	17	2	0	0	0	0	0	0	1	0	0	1	0	0	0	0	0	0
ERV316A3_1p34.2b	0	0	0	0	0	0	0	0	0	0	0	0	0	0	0	0	0	0	0	0	0	1	0	0	0	0	0	0	0	1	0	35	0	1	1	0	0	0	0	0	0	1	0	0	0	0	0	0	0
ERV316A3_1p34.3a	0	0	0	0	0	0	0	0	0	0	0	0	0	0	0	0	0	0	0	0	0	0	1	0	0	0	0	0	0	0	0	17	0	0	0	0	0	0	0	0	0	0	0	0	0	0	0	0	0
ERV316A3_1p34.3b	0	0	0	0	0	0	0	0	0	0	0	0	0	0	0	0	0	0	0	0	0	0	0	0	0	0	0	0	0	0	0	6	0	0	0	0	0	0	0	0	0	0	0	0	0	0	0	0	0
ERV316A3_1p34.3c	0	0	0	0	0	0	0	0	0	0	0	0	0	0	0	0	0	1	0	0	0	0	1	0	0	0	0	0	0	0	0	44	0	0	0	0	0	0	0	0	0	0	0	0	0	0	0	0	0
ERV316A3_1p35.1a	0	1	0	0	0	0	0	0	0	0	0	0	0	1	1	0	0	1	0	0	0	0	2	0	0	0	0	0	0	0	0	61	0	0	0	0	0	0	0	0	0	0	0	0	1	0	0	1	0
ERV316A3_1p35.1b	0	0	0	0	0	0	0	0	0	0	1	0	0	0	0	0	0	0	0	0	0	0	0	2	0	0	0	0	1	0	0	19	0	1	0	0	0	0	0	0	0	0	0	0	0	0	0	0	0
ERV316A3_1p35.2	0	0	0	0	0	0	1	0	0	0	0	0	0	0	0	0	0	0	0	0	0	0	0	0	0	0	0	0	0	0	0	39	0	0	0	0	0	0	0	0	0	0	0	0	0	0	0	0	0
ERV316A3_1p35.3a	0	0	0	0	0	0	0	0	0	0	0	0	0	0	0	0	0	0	0	0	0	0	1	0	0	0	0	0	0	0	0	9	0	0	0	0	0	0	0	0	0	0	0	0	0	0	0	0	0
ERV316A3_1p35.3b	0	0	0	0	0	0	0	0	0	0	0	0	0	0	0	0	0	0	0	0	0	0	0	0	0	0	0	0	0	0	0	19	0	0	0	0	0	0	0	0	0	0	0	0	0	0	0	0	0
ERV316A3_1p36.11a	0	0	0	0	0	0	0	0	0	0	0	0	0	0	0	0	0	0	0	0	0	0	0	0	0	0	0	0	0	0	0	16	0	0	0	0	0	0	0	0	0	0	0	0	0	0	0	0	0
ERV316A3_1p36.11b	0	0	0	0	0	0	0	0	0	0	0	0	0	0	0	0	0	0	0	0	0	0	0	0	0	0	0	0	0	0	0	19	0	0	0	0	0	0	0	0	0	0	0	0	0	0	0	0	0
ERV316A3_1p36.13	0	0	0	0	2	0	0	0	0	0	0	0	0	1	1	0	0	0	0	0	0	0	1	0	0	0	0	0	2	4	0	24	0	0	4	0	0	0	0	0	0	0	0	0	5	0	0	0	0
ERV316A3_1p36.22a	1	0	0	0	1	0	1	2	1	0	0	0	1	0	0	0	0	2	0	0	0	1	3	1	0	1	0	0	2	10	0	34	3	16	0	1	0	0	2	14	0	8	0	1	0	1	0	0	1
ERV316A3_1p36.22b	1	0	0	3	1	0	0	0	0	0	0	0	0	0	0	0	0	0	0	0	0	0	2	1	0	0	0	0	0	2	1	21	1	0	0	0	0	0	0	2	0	3	0	0	0	0	0	0	0
ERV316A3_1p36.23	0	0	0	0	0	0	0	0	0	0	0	0	0	0	0	0	0	0	0	0	0	0	1	0	0	0	0	0	2	0	0	17	0	0	0	0	0	0	0	0	0	0	0	0	0	0	0	1	0
ERV316A3_1p36.33	0	0	0	0	0	0	0	0	0	0	0	0	0	0	0	0	0	0	0	0	0	0	0	0	0	0	0	0	0	0	0	0	0	0	0	0	0	0	0	0	0	0	0	0	0	0	0	0	0
ERV316A3_1q21.2	0	4	4	3	2	1	1	1	1	6	0	2	0	15	1	0	2	9	0	9	2	1	8	12	7	0	1	0	3	13	5	41	1	0	3	2	1	9	5	5	5	2	1	1	26	6	4	3	9
ERV316A3_1q21.3a	0	0	0	0	0	0	0	0	0	0	2	0	0	0	0	0	2	0	1	3	0	0	0	0	1	0	0	0	0	1	2	34	0	0	0	0	0	1	0	0	2	0	0	0	0	0	1	0	0
ERV316A3_1q21.3b	0	0	5	0	0	0	0	0	2	0	0	0	0	0	0	0	0	2	0	1	0	0	1	0	0	0	1	0	2	7	2	42	0	1	0	0	1	1	0	5	0	8	0	0	3	0	0	0	1
ERV316A3_1q21.3c	0	0	0	0	0	0	0	0	0	0	0	0	0	0	0	0	0	0	0	0	0	0	1	0	0	0	0	0	0	0	0	5	0	0	0	0	0	0	0	0	0	0	0	0	0	0	0	0	0
ERV316A3_1q21.3d	1	1	1	2	0	0	0	0	0	0	0	0	2	1	0	0	0	0	0	3	0	0	2	1	0	0	0	0	2	1	0	30	0	0	0	0	1	0	0	2	0	0	0	3	7	0	1	2	0
ERV316A3_1q21.3e	0	0	0	0	0	0	0	0	0	0	0	0	0	0	0	0	0	0	0	0	0	0	0	0	0	0	0	0	0	0	0	17	0	0	0	0	0	0	1	0	0	0	0	0	0	0	0	0	0
ERV316A3_1q21.3f	0	0	0	0	0	0	0	0	0	0	0	0	0	0	0	0	0	0	0	0	0	0	1	0	0	0	0	0	0	1	0	15	0	0	0	0	0	0	0	0	0	0	0	0	0	0	0	0	0
ERV316A3_1q23.2	0	0	0	0	0	0	0	0	0	0	0	0	0	0	0	0	0	0	0	0	0	0	0	0	0	0	0	0	0	0	0	35	0	0	1	0	0	0	0	0	0	5	0	0	0	0	1	0	0
ERV316A3_1q23.3a	0	0	0	0	0	0	0	0	0	0	0	0	0	0	0	0	0	0	0	1	0	0	0	0	1	0	0	0	0	2	0	35	0	0	0	0	0	0	0	0	0	0	1	0	0	0	5	0	0
ERV316A3_1q23.3b	0	0	0	1	0	0	0	0	0	0	0	0	0	1	0	0	0	0	0	0	0	0	1	1	0	0	0	0	1	1	1	12	0	0	1	0	0	0	0	0	0	0	0	0	0	0	1	2	0
ERV316A3_1q23.3c	0	0	0	0	0	0	0	0	0	0	0	0	0	0	0	0	0	0	0	0	0	0	3	0	0	0	0	2	0	0	0	36	0	0	0	0	0	0	0	0	0	0	0	0	0	1	0	0	0
ERV316A3_1q23.3d	0	0	0	0	0	0	0	0	0	0	0	0	0	0	0	0	0	0	0	0	0	0	0	0	0	0	0	0	0	0	0	7	0	0	0	0	0	0	0	0	0	0	0	0	0	0	0	0	0
ERV316A3_1q23.3e	0	0	0	0	0	0	0	0	0	0	1	0	0	0	0	0	0	0	0	0	0	0	0	0	0	0	0	0	0	0	0	28	0	0	0	0	0	0	0	0	0	0	0	0	0	0	0	0	0
ERV316A3_1q23.3f	0	0	0	0	0	0	0	0	0	0	0	0	0	0	0	0	0	0	0	0	0	0	0	0	0	0	0	0	0	0	0	12	0	0	0	0	0	0	0	0	0	0	0	0	0	0	0	0	0
ERV316A3_1q23.3g	0	3	0	0	0	0	0	0	0	0	0	0	0	0	0	0	0	0	0	0	0	0	4	0	0	0	0	0	0	0	1	28	0	0	0	0	0	0	1	0	0	0	0	0	0	0	0	0	1
ERV316A3_1q24.1	0	0	0	0	1	0	0	0	0	0	0	0	0	1	2	0	0	0	0	0	0	0	0	0	0	0	0	0	0	3	7	22	0	0	0	0	0	0	0	0	0	0	0	2	0	0	0	0	0
ERV316A3_1q24.2a	0	1	0	3	5	0	1	0	0	0	3	0	0	0	13	0	0	0	3	0	1	0	4	2	1	0	0	1	1	1	4	33	3	7	1	1	1	1	4	4	0	4	3	0	3	6	1	3	7
ERV316A3_1q24.2b	0	6	0	9	9	3	0	9	3	5	0	3	2	39	0	0	9	0	0	6	18	2	3	3	2	2	4	4	19	7	11	13	8	1	2	1	1	1	6	2	8	0	12	0	9	0	0	8	1
ERV316A3_1q24.3a	0	0	1	0	1	0	3	0	1	4	0	0	0	3	0	0	0	0	1	0	0	1	2	0	1	0	0	1	1	0	0	44	0	1	0	0	0	0	1	0	0	0	1	0	2	0	1	1	0
ERV316A3_1q24.3b	0	0	0	0	0	0	0	0	0	0	0	0	0	0	0	0	0	0	0	0	0	0	0	0	0	0	0	0	0	0	0	5	0	0	0	0	0	0	0	0	0	0	0	0	0	1	0	0	0
ERV316A3_1q25.2a	0	0	0	0	0	0	0	0	0	0	0	0	0	0	0	0	0	0	0	0	0	0	0	0	0	0	0	0	0	0	0	21	0	0	0	0	0	0	0	0	0	0	0	0	0	0	0	0	1
ERV316A3_1q25.2b	0	0	0	2	0	0	0	0	0	0	0	0	0	0	0	0	0	0	0	1	0	0	0	1	0	0	0	0	0	0	0	55	0	2	0	1	0	0	0	0	0	1	0	0	0	0	0	3	8
ERV316A3_1q25.3a	0	0	0	0	0	0	0	0	0	0	0	0	0	0	0	0	2	0	0	1	0	1	0	0	0	0	0	0	0	0	0	13	0	0	0	0	0	0	0	0	0	0	0	0	0	2	0	0	0
ERV316A3_1q25.3b	1	9	2	1	6	14	2	7	0	28	2	4	2	11	11	3	19	4	13	7	16	10	6	10	10	1	40	7	14	4	5	37	13	4	10	8	2	11	14	6	3	4	7	15	13	49	1	7	2
ERV316A3_1q25.3c	0	0	0	0	0	0	0	0	0	0	0	0	0	0	0	0	0	0	0	0	0	0	0	0	0	0	0	0	0	0	0	6	0	0	0	0	0	0	0	0	0	0	0	0	0	0	0	0	0
ERV316A3_1q25.3d	0	0	0	1	0	0	0	0	0	0	0	0	0	0	0	0	0	0	0	0	0	0	0	0	0	0	0	0	0	0	0	16	0	0	0	0	0	0	0	0	0	0	0	0	0	0	0	0	0
ERV316A3_1q25.3e	0	0	0	0	0	0	0	0	1	0	0	1	0	0	0	0	0	0	0	0	0	0	0	0	0	0	0	0	0	0	0	3	0	0	0	0	0	0	0	0	0	0	0	0	0	0	0	0	0
ERV316A3_1q25.3f	0	0	0	0	0	0	0	0	1	7	0	0	0	0	0	0	0	0	0	0	0	0	1	5	0	0	0	0	0	0	0	32	0	0	0	0	0	1	1	0	0	0	0	0	0	0	0	1	0
ERV316A3_1q31.1	0	0	0	0	0	0	0	2	0	0	0	3	0	3	0	0	0	0	0	0	1	0	1	0	0	0	0	0	1	0	5	14	6	0	0	0	0	0	0	0	1	0	0	0	0	0	0	0	0
ERV316A3_1q31.2a	4	0	0	0	1	0	0	1	0	0	0	0	0	0	0	0	0	0	0	1	0	0	2	0	0	0	0	0	0	0	0	35	0	0	0	0	0	0	0	0	0	0	0	0	0	0	0	0	0
ERV316A3_1q31.2b	0	0	0	0	5	1	0	1	0	0	0	0	0	0	0	0	0	0	0	0	0	0	0	0	0	0	0	0	0	0	2	8	0	0	0	0	0	1	0	0	2	0	0	0	0	0	0	0	0
ERV316A3_1q31.3a	0	0	0	0	0	0	0	2	0	0	0	0	0	0	0	0	0	0	2	0	0	0	1	0	0	0	0	0	0	0	0	7	3	0	0	0	0	0	0	0	0	0	0	0	0	0	0	0	0
ERV316A3_1q31.3b	0	0	0	1	0	1	0	0	0	0	0	0	0	2	0	0	0	0	0	0	0	0	0	0	0	0	0	0	0	0	0	20	0	0	0	0	0	0	0	0	0	0	0	0	0	0	0	0	0
ERV316A3_1q31.3c	0	0	0	0	0	0	0	0	0	0	0	0	0	1	0	0	0	0	0	0	0	0	0	0	0	0	0	0	0	2	0	14	0	0	0	0	0	0	0	0	0	0	0	2	0	0	0	0	0
ERV316A3_1q31.3d	0	0	0	0	0	0	0	0	0	2	0	0	0	0	0	0	0	0	0	0	0	0	0	0	0	0	0	0	0	0	0	10	0	0	0	0	0	0	0	0	0	0	0	1	0	0	0	0	0
ERV316A3_1q31.3e	0	2	0	0	0	0	0	1	0	0	0	0	0	0	0	0	1	0	0	0	0	0	0	0	0	0	0	0	0	0	0	32	0	0	1	0	0	0	0	0	0	0	0	0	0	0	0	1	0
ERV316A3_1q32.1a	0	0	0	0	0	0	0	0	0	0	0	0	0	0	0	0	0	0	0	0	0	0	0	0	0	0	0	0	0	0	0	6	0	0	0	0	0	0	0	0	0	0	0	0	0	0	1	0	0
ERV316A3_1q32.1b	0	0	0	0	0	0	0	0	0	0	0	0	0	0	0	0	0	0	0	0	0	0	1	0	0	0	0	0	0	0	0	29	0	0	0	0	0	0	0	0	0	0	0	0	0	0	0	0	0
ERV316A3_1q32.1c	0	0	0	0	0	0	0	0	0	0	0	0	0	0	0	0	0	0	0	0	0	0	1	0	0	0	0	0	0	0	0	32	0	0	0	0	0	0	1	0	0	0	0	0	2	0	0	0	1
ERV316A3_1q32.2a	4	46	9	8	4	0	0	2	0	0	0	0	1	5	2	2	0	9	33	4	0	0	51	18	6	2	0	1	3	3	4	48	1	9	1	3	0	12	8	30	39	48	0	7	151	41	18	0	112
ERV316A3_1q32.2b	0	0	0	0	0	0	0	0	0	0	0	0	0	1	0	0	0	0	0	0	0	0	1	0	0	0	0	0	0	0	0	10	0	0	0	0	0	0	1	0	0	1	0	0	0	0	0	0	0
ERV316A3_1q32.2c	0	0	3	1	2	1	7	2	2	5	2	1	0	6	0	1	3	1	0	5	0	6	12	16	1	0	2	6	4	0	1	27	0	0	0	0	0	2	0	3	3	0	0	19	5	0	5	1	0
ERV316A3_1q32.2d	0	0	0	0	0	0	1	1	1	1	0	1	0	4	0	0	2	0	5	3	0	0	2	2	0	0	1	1	10	1	0	21	0	1	3	0	2	2	0	0	0	0	3	49	10	0	0	0	0
ERV316A3_1q32.2e	0	2	3	0	0	4	0	0	0	0	0	3	0	9	0	0	0	0	0	3	1	1	2	5	1	1	0	0	3	0	0	18	0	0	0	0	0	0	0	0	1	0	1	0	1	0	0	0	0
ERV316A3_1q32.3a	0	0	0	0	0	1	2	0	0	0	0	0	0	0	0	0	0	1	0	0	0	0	0	0	0	0	0	0	6	1	0	7	7	0	0	0	0	0	0	0	0	0	0	0	4	0	0	1	0
ERV316A3_1q32.3b	0	0	0	0	0	1	1	0	0	2	0	0	0	3	1	0	1	0	0	0	0	0	0	0	0	0	0	0	1	0	1	7	0	0	0	0	0	0	0	0	0	0	1	0	4	0	0	0	2
ERV316A3_1q32.3c	0	0	0	0	0	0	0	0	0	0	0	0	0	0	0	0	0	0	0	0	0	0	4	0	0	0	0	0	0	0	0	19	0	0	0	0	0	0	0	0	0	0	0	0	0	0	0	0	0
ERV316A3_1q41a	0	0	0	0	0	0	0	0	0	0	0	0	0	0	0	0	1	0	0	0	0	0	2	0	0	0	0	2	0	0	1	29	0	0	0	0	0	0	0	0	0	0	0	0	0	0	0	0	0
ERV316A3_1q41b	0	0	0	0	0	0	0	0	0	0	0	0	0	0	0	0	0	0	0	0	0	1	0	1	0	0	0	0	0	0	0	28	0	0	0	0	0	0	0	0	1	0	0	0	0	0	0	0	0
ERV316A3_1q41c	0	0	1	0	0	1	0	0	0	0	0	1	0	2	2	0	0	0	0	1	0	2	2	0	0	1	0	0	0	1	0	20	0	0	0	0	0	0	0	0	0	0	0	0	0	0	0	0	0
ERV316A3_1q41d	0	0	0	0	0	0	0	0	0	0	0	0	0	0	0	0	0	0	0	0	0	0	1	0	0	1	0	0	0	0	0	33	0	0	0	0	0	0	0	0	0	0	0	0	0	0	0	0	0
ERV316A3_1q41e	0	0	0	0	0	0	0	0	0	0	0	0	0	0	0	0	0	0	0	0	0	0	1	0	0	0	0	0	0	0	0	46	0	0	0	0	0	0	0	0	0	0	0	0	0	0	0	1	0
ERV316A3_1q42.12a	0	1	0	1	1	1	0	0	0	0	0	0	3	0	0	0	0	0	0	0	0	0	0	0	0	0	0	0	0	0	0	4	0	0	0	0	0	0	0	1	0	0	0	0	0	0	0	3	0
ERV316A3_1q42.12b	41	42	10	47	19	135	15	29	19	2	44	3	15	13	28	2	17	7	10	96	124	15	14	32	8	0	217	2	61	32	12	59	61	83	19	20	141	40	11	68	24	9	41	9	88	4	41	119	8
ERV316A3_1q42.13a	0	0	0	0	0	0	0	0	0	0	0	0	0	0	0	0	0	0	0	0	0	0	2	0	0	0	0	0	0	0	0	12	0	0	0	0	0	0	0	0	0	0	0	0	0	0	0	0	0
ERV316A3_1q42.13b	0	0	0	0	0	0	0	0	0	0	0	0	0	0	0	0	0	0	0	0	0	0	0	0	0	0	0	0	0	0	0	28	0	0	0	0	0	0	0	0	0	0	0	0	2	0	0	0	0
ERV316A3_1q42.13c	0	4	0	0	5	0	0	0	1	0	0	0	0	0	0	0	9	1	0	0	0	1	1	0	0	0	0	0	1	0	4	16	0	0	0	0	0	2	0	0	0	0	0	0	0	0	0	0	0
ERV316A3_1q42.13d	0	0	0	0	0	0	0	0	0	0	0	0	0	0	0	0	0	0	0	0	0	0	1	0	0	0	0	0	0	0	0	39	0	0	0	0	0	0	0	0	0	0	0	0	0	0	0	0	0
ERV316A3_1q42.13e	0	0	0	0	0	0	0	0	0	0	0	0	0	1	0	0	0	0	0	0	1	0	0	0	1	0	0	0	0	1	0	9	0	2	0	0	0	0	0	0	0	0	0	0	3	0	0	0	1
ERV316A3_1q42.13f	0	0	0	0	0	0	0	0	0	0	0	0	0	0	0	0	0	0	0	0	0	0	1	0	0	0	0	0	0	0	0	20	0	0	0	0	0	0	0	0	0	0	0	0	0	0	0	0	0
ERV316A3_1q42.2a	0	3	0	0	3	1	0	1	0	0	0	0	0	0	1	0	0	1	0	0	0	0	0	0	0	0	0	0	2	0	1	35	0	0	0	0	0	0	0	0	0	0	0	3	0	0	0	0	0
ERV316A3_1q42.2b	0	0	0	0	0	0	0	0	0	0	0	0	0	0	0	0	0	0	0	0	0	0	2	0	0	0	0	0	0	0	0	30	0	0	0	0	0	0	0	0	0	0	1	0	0	0	0	0	0
ERV316A3_1q42.2c	0	0	0	0	0	0	0	0	0	0	0	0	0	0	0	0	0	0	0	0	0	1	1	0	0	0	0	0	0	0	0	18	0	0	0	0	0	1	0	0	0	0	1	0	0	0	0	0	0
ERV316A3_1q43a	0	0	0	0	0	0	2	1	0	0	0	0	0	0	0	0	2	0	0	0	0	0	1	0	0	0	0	3	0	0	0	22	0	0	0	0	0	0	0	0	0	0	0	0	0	0	0	2	0
ERV316A3_1q43b	0	0	0	0	0	0	0	0	0	0	0	0	0	0	0	0	0	0	0	0	0	0	0	0	0	0	0	0	0	0	0	27	0	0	0	0	0	0	0	0	0	0	0	0	0	0	0	0	0
ERV316A3_1q43c	0	0	0	0	0	0	0	0	0	0	0	0	0	0	0	0	0	0	0	0	0	0	0	0	0	0	0	0	0	0	0	57	0	0	0	0	0	0	0	0	0	0	0	0	0	0	0	0	0
ERV316A3_1q43d	0	0	0	0	0	0	0	0	0	0	0	0	0	0	0	0	0	0	0	0	0	0	2	0	0	0	0	0	0	0	0	10	0	0	0	0	0	0	0	0	0	0	0	0	1	0	0	0	0
ERV316A3_1q43e	0	1	0	0	0	0	0	0	0	0	0	0	0	0	0	0	0	0	0	0	0	0	1	0	1	0	0	0	0	0	0	34	1	0	0	0	0	0	0	1	2	0	1	0	3	0	0	2	0
ERV316A3_1q43f	0	0	0	0	0	0	0	0	0	0	0	0	0	0	0	0	0	0	0	0	0	0	0	0	0	0	0	0	0	0	0	10	0	0	0	0	0	0	0	0	0	0	0	0	0	0	0	0	0
ERV316A3_1q43g	0	0	0	0	0	0	0	0	0	0	0	0	0	0	0	0	0	0	0	0	0	0	0	0	0	0	0	0	0	0	0	14	0	1	0	0	0	0	0	0	0	0	0	0	0	0	0	0	0
ERV316A3_1q44a	0	0	0	0	5	0	0	0	0	0	0	0	0	0	0	0	0	0	0	0	0	0	2	0	0	0	0	0	0	0	0	63	1	0	0	0	0	0	0	0	0	1	1	0	0	0	1	0	0
ERV316A3_1q44b	0	1	0	0	0	0	0	3	1	1	0	0	0	4	0	0	1	0	0	3	0	0	0	2	0	1	0	0	0	0	3	20	1	0	0	0	0	1	0	0	0	0	0	0	1	0	0	1	0
ERV316A3_1q44c	0	0	0	0	1	0	0	2	1	0	0	0	0	0	0	0	2	0	1	0	0	0	0	0	0	0	0	0	1	1	0	15	1	0	0	0	0	1	0	0	0	0	1	0	1	0	0	1	0
ERV316A3_1q44d	0	0	0	0	0	0	0	0	0	0	0	0	0	0	0	0	0	0	0	0	0	0	0	0	0	0	0	0	0	0	0	11	0	0	0	0	0	0	0	0	0	0	0	0	0	0	0	0	0
ERV316A3_20p11.21	2	16	4	3	12	8	3	24	13	10	3	11	6	77	13	1	22	11	14	10	15	18	21	15	24	5	3	11	52	44	34	21	22	5	11	8	6	3	14	4	13	4	3	12	27	2	23	23	3
ERV316A3_20p11.23a	0	0	0	0	0	0	0	0	0	0	0	0	0	0	0	0	0	0	0	0	0	0	1	0	0	0	0	0	0	0	2	18	0	0	0	0	0	0	0	1	0	0	0	0	0	0	0	0	0
ERV316A3_20p11.23b	0	0	0	2	0	0	0	0	0	0	0	0	0	0	0	0	0	0	0	0	0	0	0	0	0	0	0	0	0	0	0	12	0	0	1	0	0	0	0	0	0	0	0	0	0	0	0	0	0
ERV316A3_20p12.1a	0	0	1	0	1	0	0	0	0	0	0	0	0	0	0	0	0	2	0	0	0	3	0	2	0	0	0	0	0	0	1	32	0	0	0	0	0	0	0	0	4	0	0	0	0	0	0	0	0
ERV316A3_20p12.1b	0	0	0	0	0	0	0	0	0	0	0	0	0	0	0	0	0	0	0	0	0	0	0	0	0	0	0	0	0	0	0	11	0	0	0	0	0	0	0	1	0	0	1	0	0	0	0	0	0
ERV316A3_20p12.1c	0	0	0	0	0	0	0	0	0	0	0	0	0	0	0	0	0	0	0	0	0	0	1	0	1	0	0	0	0	0	0	9	1	0	0	0	0	0	0	0	0	0	0	0	1	0	0	0	0
ERV316A3_20p13	0	0	0	3	1	0	0	0	1	0	0	0	0	0	0	0	3	3	1	0	0	0	2	3	1	0	0	0	6	1	0	10	0	0	0	0	0	0	1	0	0	0	0	0	0	0	0	0	1
ERV316A3_20q12a	0	0	0	0	0	0	0	0	0	0	0	0	0	0	0	0	0	0	0	0	0	0	0	0	0	0	0	0	0	0	0	6	0	0	0	1	0	0	0	0	0	0	0	0	0	0	0	0	0
ERV316A3_20q12b	0	0	0	0	0	0	0	0	0	0	0	0	0	0	1	0	0	0	0	0	0	0	0	3	0	0	0	0	0	1	0	8	0	0	0	0	0	0	0	0	0	0	0	0	0	0	0	0	0
ERV316A3_20q13.12	0	1	0	1	1	0	0	0	0	0	0	2	0	2	0	0	1	0	1	0	0	0	1	1	0	2	0	0	0	2	1	17	3	0	0	0	0	1	0	2	4	2	3	0	1	3	0	3	1
ERV316A3_20q13.2	0	0	0	0	0	0	0	0	0	0	0	0	0	0	0	0	0	0	0	0	0	0	0	0	0	0	0	0	0	0	0	14	0	0	0	0	0	0	0	0	0	0	0	0	0	0	0	0	0
ERV316A3_20q13.32a	0	0	0	0	0	0	0	0	0	0	0	0	0	0	0	0	0	0	0	0	0	0	1	0	0	0	0	0	0	0	0	35	0	0	1	0	0	0	0	0	0	0	0	0	0	0	0	0	0
ERV316A3_20q13.32b	0	0	0	0	1	0	0	0	0	0	0	0	0	0	0	0	0	0	0	0	0	0	0	0	0	0	0	0	0	0	7	19	0	0	1	0	0	1	0	0	0	0	0	0	0	0	0	0	0
ERV316A3_20q13.33a	0	0	0	0	0	0	0	0	0	0	0	0	0	0	0	0	0	0	0	0	0	0	1	0	0	0	0	0	0	0	0	16	0	0	0	0	0	0	0	0	0	0	0	0	0	0	0	0	0
ERV316A3_20q13.33b	7	60	4	12	35	3	4	28	7	13	10	25	3	92	27	0	13	9	71	14	15	11	57	43	16	27	21	16	148	79	106	23	70	7	15	15	148	28	53	44	46	32	33	12	51	72	29	81	22
ERV316A3_21p12	0	0	0	0	0	0	0	0	0	0	0	0	0	0	0	0	0	0	0	0	0	0	0	0	0	0	0	0	0	0	0	0	0	0	0	0	0	0	0	0	0	0	0	0	0	0	0	0	0
ERV316A3_21q11.2a	0	0	0	0	0	0	0	0	0	0	0	0	0	0	0	0	0	0	0	0	0	0	0	0	0	0	0	0	0	0	0	13	0	0	0	0	0	0	0	0	0	0	0	0	0	0	0	0	0
ERV316A3_21q11.2b	0	0	0	0	0	0	0	0	0	0	0	0	0	0	0	0	0	0	0	0	0	0	0	0	0	0	0	0	0	0	0	15	0	0	0	0	0	0	0	0	0	0	0	0	0	0	0	0	0
ERV316A3_21q21.1a	0	0	0	0	1	0	0	0	0	0	0	0	0	0	0	0	0	0	0	0	0	0	0	0	0	0	0	0	0	0	0	11	0	0	0	0	0	0	0	0	0	0	0	0	0	0	0	0	0
ERV316A3_21q21.1b	0	0	0	0	3	0	0	0	0	1	0	0	0	0	1	0	0	0	0	0	0	0	1	0	0	0	0	0	0	0	0	9	0	0	0	0	1	0	0	0	0	0	0	0	0	0	0	0	0
ERV316A3_21q21.1c	0	0	0	0	0	0	0	0	0	0	0	0	0	0	0	0	0	0	0	0	0	0	0	0	0	0	0	0	0	0	0	4	0	0	0	0	0	0	0	0	0	0	0	0	0	0	0	0	0
ERV316A3_21q21.1d	0	0	0	0	0	0	0	0	0	0	0	0	0	0	0	0	0	0	0	0	0	0	1	0	0	0	0	0	0	0	0	27	0	0	0	0	0	0	0	0	0	0	0	0	0	0	0	0	0
ERV316A3_21q21.1e	0	0	0	0	1	0	0	0	0	0	0	0	0	0	0	0	0	0	0	0	0	1	0	0	0	0	0	0	0	0	0	15	0	0	0	0	0	0	0	0	0	0	0	0	0	0	0	0	0
ERV316A3_21q21.1f	7	30	0	4	0	0	0	3	0	0	0	0	0	35	0	0	0	0	0	0	0	0	0	0	0	0	5	0	2	0	0	22	87	0	5	0	0	0	0	0	0	0	0	0	0	0	1	58	0
ERV316A3_21q21.1g	1	4	0	0	0	0	0	0	0	0	0	0	0	3	0	0	0	0	0	0	0	0	0	0	1	0	0	0	2	0	0	14	10	0	1	0	0	0	0	0	0	0	0	0	0	0	0	7	0
ERV316A3_21q21.2a	0	0	0	0	0	0	0	0	0	0	0	0	0	0	0	0	0	0	0	0	0	0	1	0	0	0	0	0	0	0	0	11	0	0	0	0	0	0	0	0	0	0	0	0	0	0	0	0	0
ERV316A3_21q21.2b	0	0	0	0	0	0	0	0	0	0	0	0	0	0	0	0	0	0	0	0	0	0	2	0	0	0	0	0	0	0	0	25	0	0	0	0	0	0	0	0	0	0	0	0	0	0	0	0	0
ERV316A3_21q21.2c	0	0	0	0	0	0	0	0	0	0	0	0	0	0	0	0	0	0	0	0	0	0	0	0	0	0	0	0	0	0	0	15	0	0	0	0	0	0	0	0	0	0	0	0	0	0	0	0	0
ERV316A3_21q21.2d	0	0	0	0	0	0	0	0	0	0	0	0	0	0	0	0	0	0	0	0	0	1	1	1	0	0	0	0	0	0	0	40	0	0	0	0	0	0	0	0	0	0	0	0	0	0	0	0	0
ERV316A3_21q21.2e	0	0	0	0	0	0	0	0	0	0	0	0	0	0	0	0	0	0	0	0	0	0	0	0	0	0	0	0	0	0	0	17	0	0	0	0	0	0	0	0	0	0	0	0	0	0	0	0	0
ERV316A3_21q21.2f	0	0	0	0	0	0	0	0	0	0	0	0	0	0	0	0	0	0	0	0	0	0	0	0	0	0	0	0	0	0	0	30	0	0	0	0	0	0	0	0	0	0	0	0	0	0	0	0	0
ERV316A3_21q21.2g	1	0	0	2	1	0	1	7	0	6	0	2	0	4	0	2	2	0	3	3	0	0	9	6	3	12	2	2	2	0	8	34	0	0	0	3	0	14	0	6	2	0	3	0	2	1	1	4	4
ERV316A3_21q21.2h	0	0	0	0	0	0	0	0	0	0	0	0	0	0	0	0	0	0	0	0	0	0	0	0	0	0	0	0	0	0	0	4	0	0	0	0	0	0	0	0	0	0	0	0	0	0	0	0	0
ERV316A3_21q21.3a	0	0	0	0	1	0	0	0	0	0	0	0	0	0	0	0	0	0	0	0	0	0	0	0	0	0	0	0	0	0	0	17	0	0	0	0	0	0	0	0	0	0	0	0	0	0	0	0	0
ERV316A3_21q21.3b	0	0	1	0	0	0	0	0	0	0	0	0	0	0	0	0	0	0	1	0	0	0	0	0	0	0	0	0	0	0	0	5	0	0	0	0	0	0	0	0	0	0	0	0	0	0	0	0	0
ERV316A3_21q21.3c	0	0	0	0	0	0	0	0	0	0	0	0	0	0	0	0	0	0	1	0	1	0	0	0	0	0	0	0	0	0	0	18	0	0	0	0	0	0	0	0	0	0	0	0	0	0	0	0	0
ERV316A3_21q21.3d	0	0	0	0	0	0	0	0	0	0	0	0	0	0	0	0	0	0	0	0	0	0	0	0	0	0	0	0	0	0	0	6	0	0	0	0	0	0	0	0	0	0	0	0	0	0	0	0	0
ERV316A3_21q21.3e	0	0	0	0	0	0	0	0	0	0	0	0	0	0	0	0	0	0	0	0	0	0	0	1	1	0	0	0	0	0	0	13	0	0	0	0	0	0	0	1	0	0	0	0	0	0	0	0	0
ERV316A3_21q22.11a	0	0	0	1	1	0	0	0	0	0	0	0	0	1	1	0	0	0	1	0	0	0	0	0	0	1	0	0	0	2	0	32	1	0	0	0	0	0	2	1	0	0	5	0	0	1	1	0	1
ERV316A3_21q22.11b	28	63	7	44	99	12	21	57	12	60	1	35	5	64	25	9	46	24	50	65	22	18	102	118	31	84	16	31	307	60	34	53	58	20	13	17	25	41	58	65	74	73	86	11	135	27	71	68	78
ERV316A3_21q22.12a	1	0	0	0	0	0	1	0	0	0	0	0	0	0	0	0	3	0	0	0	0	2	0	0	0	0	0	0	0	0	0	11	0	0	0	0	0	0	0	0	0	0	0	0	0	0	0	0	0
ERV316A3_21q22.12b	0	3	0	1	0	0	0	2	1	0	0	0	0	0	0	0	0	0	0	0	0	0	2	1	0	0	0	2	2	2	9	67	0	0	0	0	0	0	0	1	1	0	2	0	1	0	0	2	1
ERV316A3_21q22.13	0	0	0	0	0	0	0	0	0	1	0	0	0	0	0	0	0	0	0	0	0	0	0	0	0	0	0	0	0	0	0	8	0	0	1	0	0	0	0	0	0	0	0	0	0	0	0	0	0
ERV316A3_21q22.2a	0	0	0	0	0	0	0	0	0	0	0	0	0	2	0	0	0	0	0	0	0	0	0	0	0	0	0	0	0	0	0	11	0	0	0	0	0	0	0	0	0	0	0	0	0	0	0	0	0
ERV316A3_21q22.2b	0	0	0	0	0	0	0	0	0	0	0	0	0	0	0	0	0	0	0	0	0	0	0	0	0	0	0	0	0	1	0	25	0	0	0	0	0	0	0	0	0	0	0	0	0	0	0	1	0
ERV316A3_21q22.2c	0	0	0	1	0	0	0	0	0	0	0	0	0	0	0	0	0	0	0	0	0	0	3	0	0	2	0	0	0	0	0	39	0	0	0	0	0	0	0	0	0	0	1	2	0	0	0	0	0
ERV316A3_21q22.3a	7	5	3	4	6	0	17	19	0	8	0	29	0	6	5	0	3	0	14	2	2	1	0	1	1	7	3	75	29	206	1	45	0	14	20	0	9	3	1	94	49	1	14	0	6	0	0	3	2
ERV316A3_21q22.3b	80	21	13	21	580	11	10	67	3	20	6	24	16	9	9	5	18	34	30	1	6	21	71	35	15	30	15	9	29	85	35	28	28	267	29	165	17	98	31	75	73	148	157	30	210	175	52	1	602
ERV316A3_21q22.3c	0	1	1	6	1	1	0	1	1	0	0	0	0	3	1	0	0	1	0	3	0	0	5	2	0	0	0	0	6	1	4	22	9	0	0	0	4	3	0	2	0	2	0	0	5	3	0	7	1
ERV316A3_21q22.3d	0	1	1	1	2	0	1	0	2	3	0	2	3	2	0	0	7	3	5	1	2	1	2	8	2	4	0	0	12	13	0	5	3	0	1	1	0	0	0	2	2	0	3	2	3	0	1	3	0
ERV316A3_21q22.3e	10	31	27	26	41	15	62	48	18	81	0	47	9	158	36	6	173	86	54	60	48	52	54	69	49	74	20	35	245	90	145	65	197	7	28	15	39	39	18	27	21	18	46	8	48	14	75	82	13
ERV316A3_22q11.1a	0	0	0	0	0	0	0	0	0	0	0	0	0	0	0	0	0	0	0	0	0	0	0	0	0	0	0	0	0	0	0	0	1	0	0	0	0	0	0	0	0	0	0	0	0	0	0	0	0
ERV316A3_22q11.1b	0	0	0	0	0	0	0	0	0	0	0	0	0	0	0	0	0	0	0	0	0	0	0	0	0	0	0	0	0	0	0	1	0	0	0	0	0	0	0	0	0	0	0	0	0	0	0	0	0
ERV316A3_22q11.1c	0	0	0	0	0	0	0	0	0	0	0	0	0	0	0	0	0	0	0	0	0	0	0	0	0	0	0	0	0	0	0	12	0	0	0	0	0	0	0	0	0	0	0	0	0	0	0	0	0
ERV316A3_22q11.1d	0	0	0	0	0	0	0	0	0	0	0	0	0	0	0	0	0	0	0	0	0	0	0	0	0	0	0	0	0	0	0	8	0	0	0	0	0	0	0	0	0	0	0	0	0	0	0	0	0
ERV316A3_22q11.1e	0	0	0	0	0	0	0	0	0	0	0	0	0	0	0	0	0	0	0	0	0	0	0	0	0	0	0	0	0	0	0	11	0	0	0	0	0	0	0	0	0	0	0	0	0	0	0	0	0
ERV316A3_22q11.1f	0	0	0	0	0	0	0	0	0	0	0	0	0	0	0	0	0	0	0	0	0	0	0	0	0	0	0	0	0	0	0	11	0	0	0	0	0	0	0	0	0	0	0	0	0	0	0	0	0
ERV316A3_22q11.21	0	0	0	0	0	0	0	0	0	0	0	0	0	0	0	0	0	0	0	0	0	0	1	0	0	0	0	0	0	1	1	17	0	0	0	0	0	0	0	0	0	0	0	0	0	0	0	0	0
ERV316A3_22q11.22a	0	0	0	0	0	0	0	0	1	0	0	0	0	0	0	0	0	0	0	0	0	0	0	0	0	0	0	0	0	0	0	13	0	0	0	0	0	0	0	0	0	0	0	0	0	0	0	0	0
ERV316A3_22q11.22b	0	0	0	0	0	0	0	0	0	0	0	1	0	0	0	0	0	0	0	0	0	0	0	0	0	0	0	0	0	0	0	2	0	0	0	0	0	0	0	0	0	0	1	0	0	0	0	0	0
ERV316A3_22q11.22c	0	0	0	0	0	0	0	0	0	0	0	0	0	0	0	0	0	0	0	0	0	0	0	0	0	0	0	0	0	0	0	4	0	0	0	0	0	0	0	0	0	0	0	0	0	0	0	0	0
ERV316A3_22q11.22d	0	0	0	0	0	0	0	0	0	0	0	0	0	0	0	0	0	0	0	0	0	0	1	0	0	0	0	0	0	0	0	16	0	0	0	0	0	0	0	0	0	0	0	0	0	0	0	0	0
ERV316A3_22q12.3a	28	0	0	2	1	0	0	44	3	6	0	126	0	18	4	0	35	0	0	18	1	0	4	0	21	179	21	5	1	2	14	22	0	0	1	0	0	16	0	0	40	0	7	4	0	0	0	35	0
ERV316A3_22q12.3b	420	3	0	27	10	3	23	786	1	105	0	1216	31	173	20	2	516	2	0	120	19	0	58	23	229	1441	568	44	30	27	47	81	4	1	14	2	1	525	12	2	1326	0	125	40	1	0	11	251	0
ERV316A3_22q12.3c	3	0	0	1	0	0	0	0	0	0	0	0	0	0	0	0	0	0	0	0	0	0	0	0	0	0	0	0	0	0	0	13	0	0	0	0	0	0	0	0	0	0	0	0	0	0	0	0	0
ERV316A3_22q13.1	3	1	0	0	6	1	1	4	3	6	0	3	0	6	0	1	3	6	6	1	6	1	13	21	4	0	2	1	6	5	4	20	8	0	0	0	0	8	5	5	1	4	13	2	21	5	2	0	10
ERV316A3_22q13.31a	0	2	1	0	0	9	5	6	0	1	1	2	1	14	0	0	7	0	3	4	5	8	2	3	2	10	0	4	9	10	7	16	1	2	7	0	1	2	8	0	6	2	7	1	7	1	106	5	1
ERV316A3_22q13.31b	0	1	5	7	2	6	14	7	5	4	0	2	1	0	0	0	3	6	0	16	11	0	1	0	14	2	2	52	2	17	28	7	1	0	3	8	2	0	1	6	47	2	5	0	2	126	86	6	0
ERV316A3_22q13.33a	5	9	17	3	10	10	3	107	4	8	1	33	14	5	9	1	48	10	17	13	33	22	19	15	21	1	3	3	4	6	182	24	10	14	10	42	10	41	10	13	18	26	41	0	33	34	53	25	35
ERV316A3_22q13.33b	0	6	28	8	6	11	11	0	24	9	0	17	2	23	10	0	1	5	6	0	0	17	8	18	25	0	9	0	16	1	0	6	10	0	0	0	2	0	1	1	2	2	11	4	4	0	15	3	0
ERV316A3_2p11.1a	0	0	0	0	0	0	0	0	0	0	0	0	0	0	0	0	0	0	0	0	0	0	1	0	0	0	0	0	0	0	0	9	5	0	0	0	0	0	0	0	0	0	0	0	0	0	0	0	0
ERV316A3_2p11.1b	0	0	0	0	0	0	0	0	0	0	0	0	0	0	0	0	0	0	0	0	0	0	0	0	0	0	0	0	0	0	0	12	1	0	0	0	0	0	0	0	0	0	0	0	0	0	0	0	0
ERV316A3_2p11.2a	0	0	0	0	0	0	0	0	0	0	0	0	0	0	0	0	0	0	0	0	0	0	0	0	0	0	0	0	0	0	0	13	0	0	0	0	0	0	0	0	0	0	0	0	0	0	0	0	0
ERV316A3_2p11.2b	0	0	0	0	0	0	0	0	0	1	0	0	0	0	0	0	0	0	1	0	0	0	1	1	0	0	0	0	0	0	0	45	0	0	0	0	0	0	0	0	0	0	0	0	0	0	1	0	0
ERV316A3_2p11.2c	0	0	0	1	0	0	0	0	0	0	0	0	0	0	0	0	0	0	0	0	0	0	1	0	0	0	0	0	0	2	0	27	0	0	0	0	0	0	0	0	0	0	0	0	0	0	0	0	0
ERV316A3_2p13.3	1	4	2	13	4	0	5	8	0	2	3	2	1	6	2	1	3	2	2	4	0	0	4	11	0	1	3	1	8	6	0	109	8	1	1	3	2	5	1	11	0	1	0	2	5	0	4	11	5
ERV316A3_2p14	0	0	0	0	0	0	0	0	0	0	0	0	0	0	0	0	0	0	0	0	0	0	0	0	0	0	0	0	0	0	0	39	0	0	0	0	0	0	0	0	0	0	0	0	0	0	0	0	0
ERV316A3_2p15a	0	0	0	5	2	0	0	4	2	3	2	1	0	0	0	0	0	1	2	0	1	0	0	2	0	0	0	0	1	1	2	24	0	0	1	0	1	3	0	0	0	1	0	1	1	1	13	4	1
ERV316A3_2p15b	0	1	0	0	0	0	0	3	0	0	0	0	0	1	0	0	0	2	1	0	0	0	1	1	2	0	0	0	2	0	5	9	2	0	2	0	0	1	0	0	0	0	2	0	0	1	1	1	0
ERV316A3_2p16.1a	7	33	17	14	42	16	25	45	9	53	1	13	10	61	12	1	23	11	62	31	36	30	64	79	25	51	12	30	71	123	81	23	67	5	35	9	18	11	13	34	24	32	46	6	32	9	80	37	10
ERV316A3_2p16.1b	0	0	0	0	0	0	0	0	0	0	0	0	0	0	0	0	0	0	0	0	0	0	0	0	0	0	0	0	0	0	0	19	0	0	0	0	0	0	0	0	0	0	0	0	0	0	0	0	0
ERV316A3_2p16.1c	0	0	0	0	0	0	0	0	0	0	0	0	0	0	0	0	0	0	0	0	0	0	0	0	0	0	0	0	0	0	0	9	0	0	0	0	0	0	0	0	0	0	0	0	0	0	0	0	0
ERV316A3_2p16.1d	0	0	0	0	0	0	0	0	0	0	0	0	0	0	0	0	0	0	0	0	0	0	0	0	0	0	0	0	0	0	0	6	0	0	0	0	0	0	0	0	0	0	0	0	0	0	0	0	0
ERV316A3_2p16.1e	0	0	0	0	0	0	0	0	0	1	0	0	0	0	0	0	1	0	0	0	0	0	2	0	0	0	0	0	0	2	0	23	0	0	1	1	0	0	0	0	0	0	0	0	0	0	0	0	0
ERV316A3_2p16.2	0	0	0	0	0	0	0	0	0	0	0	0	0	0	0	0	0	0	0	0	0	0	0	0	0	0	0	0	0	0	0	6	0	0	0	0	0	0	0	0	0	0	0	0	0	0	0	0	0
ERV316A3_2p16.3a	0	0	0	0	0	0	0	0	0	0	0	0	0	0	0	0	0	0	0	0	0	0	0	0	0	0	0	0	0	0	0	24	0	0	0	0	0	0	0	0	0	0	0	0	0	0	0	0	0
ERV316A3_2p16.3b	1	0	0	0	0	0	0	0	0	0	0	0	0	0	0	0	0	0	0	0	0	0	0	0	0	0	0	0	0	1	0	39	0	0	0	0	0	0	0	0	2	0	0	0	0	0	0	0	0
ERV316A3_2p22.1	0	0	0	0	0	0	0	0	0	0	0	0	0	0	0	0	0	0	0	0	0	0	0	0	0	0	0	0	1	0	0	13	0	0	0	0	0	0	0	0	0	0	0	0	0	0	0	0	0
ERV316A3_2p22.2	0	0	0	2	0	0	0	0	0	0	0	0	0	2	0	0	0	0	0	0	0	0	3	1	0	0	0	0	0	0	0	56	0	0	1	0	0	0	0	0	0	0	0	1	0	0	0	0	0
ERV316A3_2p22.3a	0	0	0	0	0	0	0	0	0	0	1	0	0	0	0	0	0	0	0	0	0	0	0	0	0	0	0	0	0	0	0	7	0	0	0	0	0	0	0	0	0	0	0	0	0	0	0	0	0
ERV316A3_2p22.3b	0	0	0	0	0	0	0	0	0	0	0	0	0	0	0	0	0	0	0	0	0	0	1	0	0	0	1	0	0	0	0	24	0	0	0	0	0	0	0	0	0	0	0	0	0	0	0	0	0
ERV316A3_2p22.3c	0	2	0	1	1	0	0	0	0	0	1	0	0	0	0	0	0	0	0	1	0	4	1	0	0	0	1	0	0	38	1	36	0	5	0	0	0	0	0	0	0	0	165	0	0	0	64	1	0
ERV316A3_2p22.3d	2	0	0	0	0	0	0	0	0	0	0	0	0	0	0	0	0	0	0	0	0	0	1	0	0	0	0	0	0	0	0	15	0	0	0	0	0	0	0	0	0	0	0	0	0	0	0	0	0
ERV316A3_2p22.3e	0	0	0	0	0	0	0	0	0	0	0	0	0	0	0	0	0	0	0	0	0	0	1	0	0	0	0	0	0	0	0	22	0	0	0	0	0	0	0	0	0	0	0	0	0	0	0	0	0
ERV316A3_2p22.3f	0	0	0	0	0	0	0	0	1	0	0	0	0	0	0	0	0	0	0	0	0	0	1	0	0	0	0	0	0	0	0	25	1	0	0	0	0	0	0	0	0	0	0	0	0	0	0	0	0
ERV316A3_2p22.3g	0	0	6	2	1	0	4	0	1	0	0	0	0	0	0	1	0	0	0	0	0	0	0	0	0	0	0	0	0	0	0	45	1	0	0	0	0	0	0	0	0	0	2	0	0	0	0	0	0
ERV316A3_2p22.3h	0	0	0	0	0	0	0	0	0	0	0	0	0	0	0	0	0	0	0	0	0	0	0	0	0	0	0	0	0	0	0	26	0	0	0	0	0	0	1	0	0	0	0	0	0	0	0	0	0
ERV316A3_2p22.3i	0	0	0	0	0	0	0	0	0	0	0	0	0	0	0	0	0	0	0	0	0	0	0	0	0	0	0	0	0	0	0	13	0	0	0	0	0	0	0	0	0	0	0	0	0	0	0	0	0
ERV316A3_2p23.3a	1	1	2	1	4	22	4	8	2	1	2	4	5	2	4	0	1	8	1	0	1	3	42	45	0	0	0	7	10	16	11	49	7	4	7	1	3	5	0	2	3	1	5	0	3	6	9	17	1
ERV316A3_2p23.3b	1	5	3	0	0	5	3	4	2	5	0	0	1	6	1	1	0	1	2	11	0	5	15	18	4	1	0	1	2	2	8	24	3	0	0	1	0	5	0	1	0	5	0	1	1	0	4	0	1
ERV316A3_2p24.1a	0	0	0	3	0	0	0	0	0	0	0	0	0	0	0	0	0	0	0	0	0	0	0	0	0	0	0	0	0	0	0	28	0	0	0	0	0	0	0	0	0	0	0	0	0	0	0	0	0
ERV316A3_2p24.1b	0	0	0	0	0	0	0	0	0	0	0	0	0	0	0	0	0	0	0	0	0	0	0	0	0	0	0	0	0	0	0	10	0	0	0	0	0	0	0	0	0	0	0	0	0	0	0	0	0
ERV316A3_2p24.1c	0	1	0	0	0	0	0	0	0	0	0	0	0	0	0	0	0	0	0	0	0	0	0	0	0	0	0	0	0	0	0	29	0	0	0	0	0	0	0	0	0	0	0	0	0	0	0	0	0
ERV316A3_2p24.1d	0	0	0	0	0	0	0	0	0	0	0	0	0	0	0	0	0	0	0	0	0	0	0	0	0	0	0	0	0	0	0	7	0	0	0	0	0	0	0	0	0	0	0	0	0	0	0	0	0
ERV316A3_2p24.3a	0	0	0	1	0	0	0	0	0	0	0	0	0	0	0	0	0	0	0	0	0	0	0	1	0	0	0	0	0	0	0	18	0	0	0	0	0	0	0	0	0	0	0	0	0	0	0	0	0
ERV316A3_2p24.3b	0	0	0	0	0	0	0	290	0	0	0	0	0	0	0	0	0	0	0	0	0	0	0	0	0	0	112	0	694	1	19	29	476	6	0	0	0	0	0	0	129	0	0	0	0	0	0	0	8
ERV316A3_2p24.3c	0	0	1	0	1	0	1	0	0	0	0	1	0	3	1	0	0	0	1	0	0	0	2	2	1	0	0	4	1	0	1	20	1	0	0	0	0	0	0	0	0	0	0	1	1	0	2	1	0
ERV316A3_2p25.1a	8	3	4	4	12	5	0	0	3	10	1	5	1	9	6	2	7	2	6	6	12	0	18	16	4	1	1	1	3	9	49	35	0	3	1	45	4	47	0	9	9	33	11	4	15	7	0	5	2
ERV316A3_2p25.1b	0	2	2	0	0	0	0	0	1	0	0	0	0	1	1	0	0	0	1	0	0	0	1	0	1	0	0	0	0	0	0	48	2	0	0	3	0	0	0	1	0	3	4	2	1	0	0	1	4
ERV316A3_2p25.3a	0	0	0	0	0	0	0	0	0	0	0	0	0	0	0	0	0	0	0	0	0	0	1	0	0	0	0	0	0	0	0	41	0	0	0	0	0	0	0	0	0	0	0	0	0	0	0	0	0
ERV316A3_2p25.3b	1	2	2	2	7	4	3	1	2	3	0	3	1	12	8	0	10	13	3	4	9	1	2	0	2	0	5	17	19	24	19	16	8	3	6	1	2	4	8	1	0	0	5	0	3	4	8	14	4
ERV316A3_2p25.3c	0	0	0	0	0	0	0	0	0	0	0	0	0	0	0	0	0	0	0	0	0	0	0	0	0	0	0	0	0	0	0	9	1	0	0	0	0	0	0	0	0	0	0	0	0	0	0	0	0
ERV316A3_2p25.3d	0	0	0	0	0	0	0	0	0	0	0	0	0	0	0	0	0	0	0	0	0	0	1	0	0	0	0	0	0	0	1	16	1	0	0	0	0	0	0	0	0	0	0	0	0	0	0	0	0
ERV316A3_2q11.2	0	0	0	0	0	0	0	0	0	0	0	0	0	0	0	0	0	0	0	0	0	0	0	0	2	0	0	0	0	0	0	47	0	0	0	0	0	0	0	0	1	0	0	0	0	0	0	1	2
ERV316A3_2q12.1a	0	0	0	0	0	0	1	0	0	0	0	0	0	0	0	0	0	0	0	0	0	0	0	4	0	0	0	0	1	0	0	26	0	0	0	0	0	0	1	0	0	0	0	0	0	0	0	0	0
ERV316A3_2q12.1b	1	0	0	0	0	0	0	0	0	0	0	0	0	0	0	0	0	0	0	0	0	0	0	0	0	0	0	0	0	0	0	18	1	0	0	0	0	1	0	0	0	0	0	0	0	0	0	0	0
ERV316A3_2q12.3a	0	0	0	0	0	0	0	0	0	0	0	0	0	0	0	0	0	0	0	0	0	0	0	0	0	0	0	0	0	0	0	59	0	0	0	0	0	0	0	0	0	0	0	0	0	0	0	0	0
ERV316A3_2q12.3b	0	0	0	0	3	0	0	1	3	0	0	0	0	2	0	0	0	0	0	0	0	0	0	0	0	0	0	0	0	0	0	5	30	0	0	0	0	0	0	0	1	0	0	0	0	0	4	2	0
ERV316A3_2q12.3c	0	0	0	0	0	0	0	0	0	0	0	0	0	0	0	0	0	0	0	0	0	0	0	0	0	0	0	0	0	0	0	10	0	0	0	0	0	0	0	0	0	0	0	0	0	0	0	0	0
ERV316A3_2q12.3d	1	3	0	0	2	0	0	1	1	1	1	0	2	3	3	0	1	0	0	3	1	0	6	3	0	1	5	0	0	4	1	16	2	0	0	0	5	1	0	1	0	3	1	1	2	0	2	1	4
ERV316A3_2q14.1a	0	0	0	0	0	0	0	0	0	0	0	0	0	0	0	0	0	0	0	0	0	0	1	0	0	0	0	0	0	0	2	31	0	0	0	0	0	0	0	0	0	0	0	0	0	0	0	0	0
ERV316A3_2q14.1b	0	4	0	3	2	4	3	1	0	2	0	3	0	4	3	0	2	4	3	2	11	2	0	1	1	1	0	12	17	5	9	29	1	0	8	1	1	0	1	3	3	1	1	0	3	0	5	4	0
ERV316A3_2q14.1c	0	0	2	1	0	1	2	2	0	0	0	1	1	4	1	0	4	5	3	7	4	3	3	2	0	1	3	8	12	8	10	7	0	0	3	1	5	0	3	0	5	4	0	0	3	0	1	1	1
ERV316A3_2q14.1d	0	0	0	0	0	0	0	0	0	0	0	0	0	0	0	0	0	0	0	0	0	0	0	0	0	0	0	0	0	0	0	11	0	0	0	0	0	0	0	0	0	0	0	0	0	0	0	0	0
ERV316A3_2q14.1e	0	0	0	0	0	0	0	15	0	1	0	0	0	5	2	3	15	0	0	3	4	0	0	0	0	0	0	0	0	20	11	15	0	0	4	0	0	0	7	10	2	0	2	0	1	0	2	0	2
ERV316A3_2q14.1f	1	0	0	0	0	0	0	0	0	1	0	0	0	0	0	1	0	0	0	0	0	0	0	0	0	0	0	0	0	0	0	35	0	0	0	0	0	0	0	0	0	0	0	0	0	0	0	0	0
ERV316A3_2q14.1g	0	0	0	0	0	0	0	0	0	0	0	0	0	0	0	0	0	0	0	0	0	0	3	0	0	0	0	0	0	0	0	20	0	0	0	0	0	0	0	0	0	0	0	0	0	0	0	0	0
ERV316A3_2q14.1h	0	0	0	0	0	0	0	0	0	0	0	0	0	0	0	0	0	0	0	0	0	0	1	0	0	0	0	0	0	0	0	16	0	0	0	0	0	0	0	0	0	0	0	0	0	0	0	0	0
ERV316A3_2q14.1i	0	0	0	0	0	0	0	0	0	0	0	0	0	1	0	0	0	0	0	0	0	0	0	0	0	0	0	0	0	0	0	18	0	0	0	0	0	0	0	0	0	0	0	0	0	0	0	0	0
ERV316A3_2q14.1j	0	1	0	1	0	0	0	0	0	0	0	0	0	1	0	0	0	0	0	0	0	0	0	0	0	0	0	0	0	0	1	28	0	0	0	0	0	0	0	0	0	0	0	0	0	0	0	1	0
ERV316A3_2q14.1k	1	0	0	1	0	0	1	4	0	0	0	1	0	3	0	0	2	0	0	0	1	0	1	0	0	1	1	2	0	4	6	63	0	1	2	0	5	0	1	0	0	0	1	0	0	0	0	0	0
ERV316A3_2q14.3a	0	0	0	0	0	0	0	0	0	0	0	0	0	0	0	0	0	0	0	0	0	0	0	0	0	0	0	0	1	0	0	26	0	0	0	0	0	0	0	0	0	0	0	0	0	0	0	0	0
ERV316A3_2q14.3b	0	0	0	0	0	0	0	0	0	0	0	0	0	0	0	0	0	0	0	0	0	0	0	0	0	0	0	0	0	0	0	8	0	0	0	0	0	0	0	0	0	0	0	0	0	0	0	0	0
ERV316A3_2q14.3c	0	0	0	0	0	0	0	0	0	0	0	0	0	0	0	0	0	0	0	0	0	0	0	0	0	0	0	0	0	0	0	11	0	0	0	0	0	0	0	0	0	0	0	0	0	0	0	0	0
ERV316A3_2q14.3d	0	0	0	0	0	0	0	0	0	0	0	0	0	0	0	0	0	0	0	0	0	0	0	0	0	0	0	0	0	0	0	14	0	0	0	0	0	0	0	0	0	0	0	0	0	0	0	0	0
ERV316A3_2q21.2a	0	0	1	1	0	0	0	0	0	0	0	0	0	0	1	0	0	0	0	0	0	0	0	0	0	0	0	0	0	1	0	4	0	0	0	0	0	0	0	0	0	2	0	0	0	0	0	2	0
ERV316A3_2q21.2b	0	0	0	0	0	0	0	0	0	0	0	0	0	0	0	0	0	0	0	0	0	0	0	0	0	1	0	0	2	1	0	11	7	0	0	0	0	0	0	0	0	0	0	0	0	0	0	0	0
ERV316A3_2q21.2c	0	0	0	0	0	0	1	0	0	0	0	0	0	0	0	0	0	0	0	0	0	0	2	0	0	0	0	0	0	1	0	33	0	0	0	0	0	0	0	0	0	0	1	0	0	0	0	0	0
ERV316A3_2q21.3	4	3	1	0	11	0	0	2	2	4	0	4	0	10	1	0	0	1	3	5	3	6	4	7	1	1	0	1	2	2	47	37	1	0	0	1	1	1	0	0	0	0	0	2	4	0	0	0	1
ERV316A3_2q22.1a	0	0	0	0	0	0	0	0	0	0	0	0	0	2	0	0	0	0	0	0	0	0	2	0	0	0	0	0	0	0	0	49	0	0	0	0	0	0	0	0	0	0	0	0	0	1	0	0	0
ERV316A3_2q22.1b	0	1	0	0	0	0	0	0	0	0	0	0	0	2	1	0	0	0	0	0	0	0	1	0	0	0	0	0	0	0	0	34	0	0	0	0	0	0	0	0	0	0	0	0	0	0	0	0	0
ERV316A3_2q22.2a	0	0	0	0	0	0	0	0	0	0	0	1	0	1	0	0	0	0	0	0	0	0	0	0	0	0	0	0	3	2	2	41	0	0	0	0	0	0	0	0	2	0	0	0	0	0	0	0	0
ERV316A3_2q22.2b	0	0	0	0	0	0	0	0	0	1	0	0	0	1	0	0	2	0	0	0	0	0	1	2	1	0	0	0	0	1	0	16	0	0	0	0	0	0	0	0	0	0	0	0	1	0	1	0	1
ERV316A3_2q22.3a	0	1	1	0	0	0	0	0	0	0	0	0	0	1	0	0	1	0	0	0	0	0	1	0	0	0	0	0	0	0	0	16	0	0	0	0	1	0	0	0	1	0	1	0	1	1	0	0	3
ERV316A3_2q22.3b	0	0	0	0	0	0	0	0	0	0	0	0	0	1	0	0	0	0	0	0	0	0	1	0	1	0	0	1	0	0	0	22	0	0	0	0	0	0	0	0	0	0	0	0	0	0	0	0	0
ERV316A3_2q22.3c	12	5	0	3	92	1	4	1	2	0	5	85	2	0	4	0	0	1	0	10	1	0	5	25	110	0	1	165	2	0	0	13	1	0	0	0	3	10	1	2	0	0	9	8	1	2	1	0	0
ERV316A3_2q22.3d	0	0	0	0	0	0	0	0	0	0	0	0	0	0	0	0	0	0	0	0	0	0	3	0	0	0	0	0	0	0	0	22	0	0	0	0	0	0	0	0	14	0	0	0	0	0	0	0	0
ERV316A3_2q22.3e	0	0	0	0	0	0	0	0	0	0	0	0	0	0	0	0	0	0	0	0	0	0	1	0	0	0	0	0	0	0	0	13	0	0	0	0	0	0	0	0	0	0	0	0	0	0	0	0	0
ERV316A3_2q23.2	0	0	0	0	0	0	0	0	0	0	0	0	0	0	0	0	0	0	0	0	0	0	1	0	0	0	0	0	0	0	0	14	0	0	0	0	0	0	0	0	0	0	0	0	0	0	0	0	0
ERV316A3_2q23.3a	0	0	0	0	0	0	0	0	0	0	0	0	0	0	0	0	0	0	0	0	0	0	0	0	0	0	0	0	0	0	0	47	0	0	0	0	0	0	0	0	0	0	0	0	0	0	0	0	0
ERV316A3_2q23.3b	0	0	0	0	0	0	0	0	0	0	0	0	0	0	0	0	0	0	1	0	0	0	0	0	0	0	0	0	0	0	0	15	0	0	0	0	0	0	0	0	0	0	0	0	0	0	0	0	0
ERV316A3_2q24.1a	0	0	0	0	0	0	0	0	0	0	0	0	0	0	0	0	0	0	0	0	0	0	0	0	0	0	1	0	0	0	0	17	0	0	0	0	0	0	0	0	0	0	0	0	0	0	0	2	0
ERV316A3_2q24.1b	0	0	0	0	0	0	0	0	0	0	0	0	0	2	0	0	0	0	0	0	0	0	0	0	0	0	0	0	4	0	0	25	0	0	0	0	0	0	0	0	0	0	0	0	1	0	1	3	0
ERV316A3_2q24.1c	0	0	0	0	0	0	0	0	0	0	0	0	0	0	0	0	0	0	0	0	0	0	0	0	0	0	0	0	0	0	0	17	0	0	0	0	0	0	0	0	0	0	0	0	0	0	0	0	0
ERV316A3_2q24.1d	0	0	0	0	0	0	0	0	0	0	0	0	0	0	0	0	0	0	0	0	0	0	0	0	0	0	0	0	3	0	0	45	0	0	0	0	0	0	0	0	0	0	0	0	0	0	0	2	0
ERV316A3_2q24.1e	0	0	0	0	0	0	0	0	0	0	0	0	0	0	0	0	0	0	0	0	0	0	0	0	0	0	0	0	0	0	0	10	0	0	0	0	0	0	0	0	0	0	0	0	0	0	0	0	0
ERV316A3_2q24.1f	0	1	2	1	0	0	0	4	0	2	0	0	0	0	2	1	2	0	1	2	0	1	2	1	0	0	0	0	0	1	1	45	1	1	0	0	0	0	0	0	0	1	1	0	1	2	0	1	0
ERV316A3_2q24.2a	0	1	0	0	0	0	0	0	0	0	0	0	0	2	0	0	0	0	0	0	0	0	0	0	0	0	0	0	0	0	0	5	0	0	0	0	0	0	0	0	0	0	0	0	1	0	0	0	0
ERV316A3_2q24.2b	0	0	0	0	0	0	0	0	0	0	0	0	0	0	0	0	0	0	0	0	0	0	4	0	0	0	0	0	0	0	0	45	0	0	0	0	0	0	0	0	0	1	0	0	0	0	0	0	0
ERV316A3_2q24.2c	0	0	0	0	0	0	0	0	0	0	0	0	0	0	0	0	0	0	0	0	0	0	0	0	0	0	0	0	0	0	0	23	0	0	0	0	0	0	0	0	0	0	0	0	0	0	0	0	0
ERV316A3_2q24.3a	0	0	0	0	0	0	0	1	0	0	0	1	0	0	0	0	0	0	0	0	0	0	0	0	0	0	0	0	0	0	2	49	0	0	0	0	0	1	0	0	0	0	0	0	0	0	0	1	0
ERV316A3_2q24.3b	0	0	0	0	0	0	0	0	0	0	0	0	0	0	0	0	0	0	0	0	0	0	0	0	0	0	0	0	0	0	0	10	0	0	0	0	0	0	0	0	0	0	0	0	0	0	0	0	0
ERV316A3_2q24.3c	0	0	0	0	0	0	0	0	0	0	0	0	0	0	0	0	0	0	0	0	0	0	2	0	0	0	0	0	0	0	0	13	0	0	0	0	0	0	0	0	0	0	0	0	0	0	0	0	0
ERV316A3_2q24.3d	0	0	0	2	2	0	5	0	0	0	0	0	0	1	0	0	1	0	0	1	0	0	0	0	0	0	0	0	1	0	0	31	2	0	0	0	0	0	0	0	0	0	0	0	1	0	0	1	0
ERV316A3_2q24.3e	0	0	0	0	0	0	0	0	0	0	0	0	0	1	0	0	0	0	0	0	0	0	0	0	0	0	0	0	0	0	0	26	0	0	0	0	0	0	0	0	1	0	0	0	0	0	0	0	0
ERV316A3_2q31.1a	0	0	0	0	0	0	0	0	0	0	0	0	0	1	0	0	0	0	0	0	0	0	0	1	0	0	0	0	0	0	0	12	0	0	1	0	0	0	0	0	0	0	1	0	0	0	0	0	0
ERV316A3_2q31.1b	3	10	6	10	7	8	12	17	2	7	6	6	3	10	6	4	2	2	21	22	19	6	10	13	0	23	1	4	16	17	23	41	9	3	6	0	17	4	5	0	23	24	2	4	23	2	13	18	0
ERV316A3_2q31.2	0	2	1	0	1	0	0	0	0	4	0	0	0	0	0	0	0	0	0	0	0	0	2	1	0	0	0	1	1	1	0	26	1	0	0	0	1	0	2	0	0	0	0	1	1	0	0	1	0
ERV316A3_2q31.3a	0	0	0	0	0	0	0	0	0	0	0	0	0	0	0	0	0	0	0	0	0	0	0	0	0	0	0	0	0	0	0	25	0	0	0	0	0	0	0	0	0	0	0	0	0	0	0	0	0
ERV316A3_2q31.3b	0	0	0	0	0	0	0	0	0	0	0	0	0	0	0	0	0	0	0	0	0	0	1	0	0	0	0	0	0	0	0	28	0	0	0	0	0	0	0	0	1	0	0	0	0	0	0	0	0
ERV316A3_2q31.3c	0	0	0	0	0	0	0	0	0	0	0	0	0	0	0	0	0	0	0	0	0	0	0	0	0	0	0	0	0	0	0	27	0	0	0	0	0	0	0	0	0	0	0	0	0	0	0	0	0
ERV316A3_2q31.3d	0	0	0	0	0	0	0	0	0	0	0	0	0	0	0	0	0	0	0	0	0	0	0	0	0	0	0	0	0	0	0	31	1	0	0	0	0	0	0	0	0	0	0	0	1	0	0	0	0
ERV316A3_2q31.3e	0	0	0	0	0	0	0	0	0	0	0	0	0	0	0	0	0	0	0	0	0	0	0	0	0	0	0	0	0	0	0	20	0	0	0	0	0	0	0	0	0	0	0	0	0	0	0	0	0
ERV316A3_2q32.1a	0	0	0	3	0	0	0	0	0	0	0	0	0	0	2	0	0	0	0	0	0	0	1	0	0	0	0	0	0	0	0	37	0	0	0	0	0	0	0	0	0	0	2	0	0	0	0	0	3
ERV316A3_2q32.1b	0	0	0	0	0	0	0	1	0	0	0	0	0	0	0	0	0	0	0	0	0	0	2	0	0	0	0	0	0	0	0	30	1	0	0	0	0	0	0	0	0	1	0	0	0	0	0	0	0
ERV316A3_2q32.1c	0	0	0	0	0	0	0	0	0	0	0	0	0	0	0	0	0	0	0	0	0	0	0	0	0	0	0	0	0	0	0	34	2	0	0	0	0	0	0	0	0	0	0	0	0	0	0	0	0
ERV316A3_2q32.1d	0	0	0	0	0	0	0	0	0	0	0	0	0	0	0	0	0	0	0	0	0	0	0	0	0	0	0	0	0	0	0	12	0	0	0	0	0	0	0	0	0	0	0	0	0	0	0	0	0
ERV316A3_2q32.1e	0	0	0	0	0	0	0	0	0	0	0	0	0	0	0	0	0	0	0	0	0	0	0	0	0	0	0	0	0	0	0	8	0	0	0	0	0	0	0	0	0	0	0	0	0	0	0	0	0
ERV316A3_2q32.1f	0	0	0	0	0	0	0	1	0	0	0	0	1	0	0	0	0	0	0	0	0	0	2	0	0	0	0	0	0	0	1	22	0	0	0	0	0	0	0	0	1	0	0	0	0	0	0	0	0
ERV316A3_2q32.1g	0	0	0	0	0	0	0	0	0	0	0	0	0	0	0	0	0	0	0	0	0	0	2	0	0	0	0	0	0	0	0	29	0	0	0	0	0	0	0	0	0	0	0	0	0	0	0	0	0
ERV316A3_2q32.1h	0	0	1	0	0	0	0	0	0	0	0	0	0	0	0	0	0	0	0	0	0	0	1	0	0	0	1	0	3	0	0	22	0	0	0	0	0	0	0	0	0	0	0	0	1	0	0	0	0
ERV316A3_2q32.1i	0	0	0	0	1	0	0	0	0	0	0	0	0	0	0	0	0	0	0	0	0	0	1	0	0	0	0	0	0	0	0	12	0	0	0	0	0	0	0	0	2	0	0	0	0	0	0	0	2
ERV316A3_2q32.2a	0	1	0	0	0	0	0	0	1	0	0	0	0	0	0	0	2	0	0	0	0	0	0	0	0	0	1	0	0	1	1	19	1	0	0	0	0	0	0	0	0	1	0	0	0	0	0	1	0
ERV316A3_2q32.2b	0	0	0	0	572	6	3	60	0	1	3	1	0	2	1	0	2	0	2	1	0	0	3	1	3	0	0	67	2	6	0	4	1	5	0	1	9	2	1	9	1	2	2	28	4	4	0	2	2
ERV316A3_2q32.2c	5	2	0	1	82	3	0	2	0	0	1	0	1	2	2	0	0	1	0	0	1	0	4	1	1	0	0	3	1	3	1	21	0	0	0	0	3	0	0	2	0	2	1	1	0	0	0	4	0
ERV316A3_2q32.3a	0	4	0	0	4	1	1	2	0	1	0	0	0	0	0	0	1	1	1	0	2	0	1	3	0	0	0	1	4	0	1	20	1	0	2	1	1	0	0	3	0	1	1	0	4	1	1	2	1
ERV316A3_2q32.3b	2	1	0	2	0	0	0	0	0	0	0	0	0	13	0	0	0	0	0	0	0	0	1	2	0	0	0	0	0	0	0	12	3	0	0	0	0	0	1	0	0	0	0	0	0	0	0	0	0
ERV316A3_2q32.3c	0	0	0	0	0	0	0	0	0	0	0	0	0	0	0	0	0	0	0	0	0	0	0	0	0	0	0	0	0	0	0	5	0	0	1	0	0	0	0	0	0	0	0	0	0	0	0	0	0
ERV316A3_2q33.1a	0	0	0	0	3	0	0	0	0	0	0	0	0	0	0	0	0	0	0	0	0	0	0	0	0	0	0	0	0	0	0	16	0	0	0	0	0	0	0	0	0	0	0	0	0	0	0	0	0
ERV316A3_2q33.1b	0	0	0	0	0	0	0	0	0	0	0	0	0	1	0	0	0	0	0	0	0	0	0	0	0	0	0	0	0	0	0	10	0	0	0	0	0	0	0	0	0	0	0	0	0	0	0	0	0
ERV316A3_2q33.1c	0	0	0	0	0	0	0	0	0	0	0	0	0	0	0	0	0	0	0	0	0	0	0	0	0	0	0	0	0	0	0	10	0	0	0	0	0	0	0	0	0	0	0	0	0	0	0	0	0
ERV316A3_2q33.1d	0	0	0	0	0	0	0	0	0	0	0	0	0	0	0	0	0	0	0	0	0	0	1	0	0	0	0	0	0	0	0	43	0	0	0	0	0	0	0	0	0	0	0	0	0	0	0	0	0
ERV316A3_2q33.1e	0	0	0	0	0	0	0	0	0	0	0	0	0	0	0	0	0	0	0	0	0	0	0	0	0	0	0	0	0	0	0	36	0	0	0	0	0	0	0	0	0	0	0	0	0	0	0	0	0
ERV316A3_2q33.1f	0	0	0	0	0	0	0	0	0	0	0	0	0	0	0	0	0	0	0	0	0	0	0	0	0	0	0	0	0	0	0	21	0	0	0	0	0	0	0	0	0	0	0	0	0	0	0	0	0
ERV316A3_2q33.1g	1	1	1	4	0	3	2	1	0	2	0	0	2	3	0	0	1	2	3	4	3	7	4	4	3	0	0	4	1	3	6	16	3	0	2	1	0	0	9	0	2	0	0	0	2	0	6	0	2
ERV316A3_2q33.1h	1	0	0	0	0	0	0	0	0	1	0	0	0	1	0	0	0	0	0	0	0	0	2	2	0	0	0	0	1	0	0	5	0	0	0	0	0	0	0	0	0	1	0	0	4	0	0	0	1
ERV316A3_2q33.2	0	0	0	0	0	0	0	0	1	0	0	0	0	0	0	0	0	0	0	0	0	0	3	0	0	0	0	0	0	0	0	55	0	0	0	0	0	0	0	1	0	0	0	0	0	0	0	0	1
ERV316A3_2q33.3a	0	0	1	0	0	0	0	3	0	0	0	0	0	2	0	0	1	0	0	0	0	0	1	1	0	0	0	0	0	0	0	23	1	0	0	0	1	0	3	0	0	0	1	0	0	0	0	1	0
ERV316A3_2q33.3b	0	0	0	0	0	0	0	0	0	0	0	0	0	0	0	0	0	0	0	0	0	0	1	0	0	0	0	0	0	0	0	33	1	0	0	0	0	0	0	0	0	1	0	0	0	0	0	0	0
ERV316A3_2q33.3c	0	0	0	0	0	0	0	0	0	0	0	0	0	0	0	0	0	0	0	0	2	0	0	0	0	0	0	0	0	0	0	8	0	0	0	0	0	0	0	0	0	0	0	0	0	0	0	0	0
ERV316A3_2q34a	0	0	0	0	1	0	0	0	0	0	0	0	0	0	0	0	0	0	0	0	0	0	0	0	0	0	0	1	0	0	0	8	0	0	0	0	0	0	0	0	0	0	0	0	0	0	0	0	0
ERV316A3_2q34b	0	0	0	0	0	0	0	0	0	0	0	0	0	0	0	0	0	0	0	0	0	0	0	0	0	0	0	0	0	0	0	32	0	0	0	0	0	0	0	0	0	0	0	0	0	0	0	0	0
ERV316A3_2q34c	0	0	0	0	0	0	0	0	0	0	0	0	0	0	0	0	0	0	0	0	0	0	0	0	0	0	0	0	0	0	0	28	0	0	0	0	0	0	0	0	0	0	0	0	0	0	0	0	0
ERV316A3_2q34d	0	0	0	0	0	0	0	0	0	0	0	0	0	0	0	0	0	0	0	0	0	0	0	0	0	0	0	0	0	0	0	17	0	0	0	0	0	0	0	0	0	0	0	0	0	0	0	0	0
ERV316A3_2q34e	0	0	0	0	0	0	0	0	0	2	0	0	0	2	0	0	0	0	0	0	0	0	0	1	0	0	0	0	0	0	3	36	0	0	0	0	0	0	0	0	0	0	0	0	0	0	0	1	0
ERV316A3_2q34f	0	0	1	2	0	0	1	1	0	1	0	1	0	1	0	0	2	0	1	0	0	0	0	0	0	8	0	0	0	0	4	26	5	0	0	0	0	0	2	1	1	2	1	0	1	0	0	1	2
ERV316A3_2q35a	0	0	0	0	0	0	0	0	0	0	0	0	0	0	0	0	0	0	0	0	1	0	0	0	0	0	0	0	1	0	0	6	0	0	0	0	0	0	0	0	0	0	0	0	0	0	2	2	0
ERV316A3_2q35b	0	0	0	0	1	0	0	0	0	1	0	1	0	1	0	0	2	0	4	0	0	0	1	0	0	0	0	0	2	0	0	28	0	0	0	0	0	0	0	0	1	0	0	0	1	0	1	0	0
ERV316A3_2q35c	0	0	0	0	0	0	0	0	0	0	0	0	0	0	0	0	0	0	0	0	0	0	0	0	0	0	0	0	0	0	0	12	0	0	0	0	0	0	0	0	0	0	0	0	0	0	0	0	0
ERV316A3_2q35d	0	0	1	0	0	0	0	0	0	0	0	0	0	0	0	0	0	0	0	0	0	0	0	0	0	0	0	0	0	0	0	16	0	0	0	0	0	0	0	0	0	0	0	0	0	0	0	0	0
ERV316A3_2q35e	6	8	6	2	30	3	6	8	1	4	3	4	2	9	9	2	4	4	13	13	28	13	26	27	7	9	5	16	57	8	16	13	5	7	0	3	5	7	36	7	8	2	6	6	9	5	3	7	7
ERV316A3_2q35f	4	3	6	6	3	7	1	9	1	9	0	6	1	10	2	1	11	11	11	10	13	2	8	7	2	3	1	8	26	4	9	28	24	1	0	2	3	2	3	6	6	4	12	5	16	1	7	10	12
ERV316A3_2q35g	0	0	0	0	0	0	0	0	0	0	0	0	0	0	0	0	0	0	0	0	0	0	1	0	0	0	0	0	0	0	0	6	0	0	0	0	0	0	0	0	0	0	0	0	0	0	0	0	0
ERV316A3_2q35h	1	3	0	0	2	1	1	1	0	3	1	0	1	5	0	1	5	6	1	1	4	0	0	2	1	0	1	1	11	1	0	31	0	0	0	0	3	0	3	1	2	0	0	0	1	1	5	3	0
ERV316A3_2q35i	0	1	0	0	0	3	2	0	0	0	0	1	0	2	0	0	3	0	1	1	1	0	2	1	1	0	1	3	4	0	3	39	3	1	0	0	2	0	0	2	2	0	1	1	1	0	1	0	0
ERV316A3_2q35j	4	0	0	1	2	4	4	9	1	0	0	3	1	3	0	5	8	0	1	0	2	0	8	3	1	0	2	2	8	10	17	30	1	0	1	0	1	0	4	2	2	1	5	8	4	0	4	4	0
ERV316A3_2q36.1a	0	0	0	0	0	0	0	0	0	1	0	0	0	0	0	0	0	0	0	0	0	0	0	0	0	0	0	0	0	1	0	28	0	0	0	1	0	0	0	0	0	0	0	0	0	0	0	0	0
ERV316A3_2q36.1b	0	0	0	0	0	0	0	0	0	0	0	0	0	0	0	0	0	0	0	0	0	0	0	0	0	0	0	0	0	0	0	23	0	0	0	0	0	0	0	0	0	0	0	0	0	0	0	0	0
ERV316A3_2q36.2	4	2	4	2	11	0	6	0	1	5	0	2	0	8	2	0	5	1	4	2	3	16	13	9	1	0	0	3	2	5	10	16	5	3	1	2	1	5	0	8	4	0	0	2	10	1	0	1	12
ERV316A3_2q36.3a	0	0	0	0	0	0	0	0	0	0	0	0	0	0	0	0	0	0	0	0	0	0	1	0	0	0	0	0	0	0	0	15	0	0	0	0	0	0	0	0	0	0	0	0	0	0	0	0	0
ERV316A3_2q36.3b	0	0	0	0	0	0	0	0	0	0	0	0	0	0	0	0	0	0	0	0	0	0	0	0	0	0	0	0	0	0	0	11	0	0	0	0	0	0	0	0	0	0	0	0	1	0	0	0	0
ERV316A3_2q36.3c	0	0	0	0	0	0	0	0	0	0	0	0	0	0	0	0	0	0	0	0	0	0	2	0	0	0	0	0	0	0	0	19	0	0	0	0	0	2	0	0	1	1	0	0	0	0	0	0	0
ERV316A3_2q36.3d	0	0	0	0	0	0	0	0	0	0	0	0	0	0	0	0	0	0	0	0	0	0	0	0	0	0	0	0	0	0	0	13	0	0	0	0	0	0	0	0	0	0	0	0	0	0	0	0	0
ERV316A3_2q37.1a	60	95	29	42	203	19	64	148	23	90	7	156	4	129	21	14	5	51	88	89	70	91	93	94	87	157	88	291	118	205	256	57	48	20	47	46	26	111	53	111	180	75	72	7	129	77	43	230	94
ERV316A3_2q37.1b	0	0	0	0	0	0	0	0	0	0	0	0	0	0	0	0	0	0	0	0	0	0	1	0	1	0	0	0	0	2	0	19	0	0	0	0	0	0	0	0	0	0	0	0	0	0	0	0	0
ERV316A3_2q37.2a	0	0	0	0	0	0	0	1	0	0	0	0	0	0	0	0	0	0	0	2	0	0	0	0	0	0	0	1	0	1	0	20	0	0	0	0	0	0	0	0	0	0	0	0	1	0	0	1	0
ERV316A3_2q37.2b	0	0	0	0	0	0	0	0	0	0	0	0	0	0	0	0	1	0	0	0	0	0	2	1	0	0	0	0	0	0	0	13	0	1	0	0	0	0	0	0	2	2	0	0	0	1	0	0	1
ERV316A3_2q37.3a	0	0	0	0	0	0	0	0	0	0	0	0	0	0	0	0	0	0	0	0	0	0	0	0	0	0	0	0	0	0	0	49	0	0	0	0	0	0	0	2	0	0	0	0	1	0	0	0	0
ERV316A3_2q37.3b	0	1	0	1	0	0	1	1	0	0	0	0	0	1	0	0	0	0	1	0	1	1	1	5	3	0	0	3	7	2	0	13	2	0	0	0	0	0	0	1	1	0	0	0	6	0	0	1	0
ERV316A3_2q37.3c	1	6	0	2	6	1	0	5	2	2	1	7	0	2	0	0	1	3	5	1	3	4	5	8	3	2	5	4	19	18	8	18	11	0	1	0	3	0	5	2	4	4	5	5	8	4	18	3	2
ERV316A3_3p11.1	0	0	0	0	0	0	0	0	0	0	0	0	0	0	0	0	0	0	0	0	0	0	0	0	0	0	0	0	0	0	0	18	0	0	0	0	0	0	0	0	0	0	0	0	0	0	0	0	0
ERV316A3_3p11.2	0	0	0	0	0	0	0	4	0	0	0	0	0	0	0	0	0	0	0	0	0	0	0	0	0	0	0	17	0	0	0	19	0	0	0	0	0	0	0	0	0	2	0	0	0	1	0	0	0
ERV316A3_3p12.1a	0	0	0	0	0	0	0	0	0	0	0	0	0	0	0	0	0	0	0	0	0	0	0	0	0	0	0	0	0	0	0	21	0	0	0	0	0	0	0	0	0	0	0	0	0	0	0	0	0
ERV316A3_3p12.1b	0	0	0	0	0	0	0	0	0	0	0	0	0	0	0	0	0	0	0	0	0	0	0	0	0	0	0	0	0	0	0	15	0	0	0	0	0	0	0	0	0	0	0	0	0	0	0	0	0
ERV316A3_3p12.1c	0	0	0	0	0	0	0	0	0	0	0	0	0	0	0	0	0	0	0	0	0	0	1	0	0	0	0	0	0	0	0	9	0	0	0	0	0	0	0	0	0	0	0	0	0	0	0	0	0
ERV316A3_3p12.1d	0	0	0	0	0	0	0	0	0	0	0	0	0	0	0	0	0	0	0	0	0	0	0	0	0	0	0	0	0	0	0	18	0	0	0	0	0	0	0	0	0	1	0	0	0	0	0	1	0
ERV316A3_3p12.2a	0	0	0	0	0	0	0	0	0	0	0	0	0	0	0	0	0	0	0	0	0	0	1	0	0	0	0	0	0	0	0	31	0	0	0	0	0	0	0	0	0	0	0	0	0	0	0	0	0
ERV316A3_3p12.2b	0	0	0	0	1	0	0	0	0	0	0	0	1	0	0	0	0	0	0	0	0	2	0	0	0	0	0	0	0	0	0	19	0	0	0	0	0	0	0	0	0	0	0	0	0	0	0	0	0
ERV316A3_3p12.2c	2	0	0	0	0	0	0	0	0	0	0	0	0	0	0	0	0	0	0	0	0	2	0	0	0	0	0	0	0	0	0	39	0	0	0	0	0	0	0	0	0	0	0	0	1	0	0	0	0
ERV316A3_3p12.2d	0	0	0	1	0	0	0	0	0	0	0	0	0	0	0	0	0	0	0	0	0	0	0	1	0	0	0	0	0	0	0	24	0	0	0	0	0	0	0	0	0	0	0	0	0	0	0	0	0
ERV316A3_3p12.2e	0	0	0	0	0	0	0	0	0	0	0	0	0	2	0	0	0	0	0	0	0	0	1	0	0	0	0	0	0	0	0	10	0	0	0	0	0	1	0	0	1	0	0	0	0	0	0	0	0
ERV316A3_3p12.2f	0	0	0	0	0	0	0	0	0	0	0	0	0	1	0	0	0	0	0	0	0	0	2	0	0	0	0	0	0	0	0	50	0	0	0	0	0	0	0	0	1	0	0	0	0	0	0	0	0
ERV316A3_3p12.2g	0	0	0	0	0	0	0	0	0	0	0	0	0	0	0	0	0	0	0	0	0	0	1	0	0	0	0	0	0	0	0	20	0	0	0	0	0	0	0	0	0	0	0	0	0	0	0	0	0
ERV316A3_3p12.3a	0	0	0	0	0	0	0	0	0	0	0	0	0	0	0	0	0	0	0	0	0	0	2	1	0	1	0	0	2	0	0	17	0	0	0	0	0	0	0	0	0	0	0	0	0	0	0	0	0
ERV316A3_3p12.3b	0	0	0	0	0	0	0	0	0	0	0	0	0	0	0	0	0	0	0	0	0	0	0	0	0	0	0	0	0	0	0	7	0	0	0	0	0	0	0	0	0	0	0	0	0	0	0	0	0
ERV316A3_3p12.3c	0	0	0	0	0	0	0	0	0	0	0	0	0	0	0	0	0	0	0	0	0	0	0	0	0	0	0	0	0	0	0	10	0	0	0	0	0	0	0	0	0	0	0	0	0	0	0	0	0
ERV316A3_3p12.3d	0	0	0	0	0	0	0	0	0	0	0	0	0	0	0	0	0	0	0	0	0	0	1	0	0	0	0	0	0	0	0	23	0	0	0	0	0	0	0	0	0	0	0	0	0	0	0	0	0
ERV316A3_3p12.3e	0	0	0	0	0	0	0	0	0	0	0	0	0	0	0	0	0	0	0	0	0	0	3	0	0	0	0	0	0	0	0	26	0	0	0	0	0	0	0	0	0	0	0	0	0	0	0	0	0
ERV316A3_3p14.2	0	0	0	0	0	0	0	0	0	0	0	0	0	0	0	0	0	0	0	0	0	0	0	0	0	0	0	0	0	0	0	9	0	0	0	0	0	0	0	0	0	0	0	0	0	0	0	0	0
ERV316A3_3p21.1a	0	0	0	0	0	0	0	0	0	0	0	0	0	0	0	0	0	0	0	0	0	0	3	0	0	0	0	0	0	0	0	24	0	0	0	0	0	0	0	0	0	0	0	0	0	0	0	0	0
ERV316A3_3p21.1b	0	0	0	0	0	0	1	0	0	0	0	0	0	0	0	0	0	0	0	0	0	0	1	0	0	0	0	0	0	0	0	26	0	0	0	0	0	0	0	0	0	0	0	0	0	0	0	0	0
ERV316A3_3p21.1c	0	0	0	0	0	0	0	0	0	0	0	0	0	0	0	0	0	0	0	0	0	0	0	0	0	0	0	0	0	0	0	28	0	0	0	0	0	0	0	0	0	0	0	0	0	0	0	0	0
ERV316A3_3p21.2a	0	0	0	0	0	0	0	0	0	0	0	0	0	0	0	0	0	0	0	0	0	0	0	0	0	0	0	0	0	0	0	29	0	0	0	0	0	0	0	0	0	0	0	0	0	0	0	0	0
ERV316A3_3p21.2b	0	0	0	0	0	0	0	0	0	0	0	0	0	0	0	0	0	0	0	0	0	0	0	0	0	0	0	0	0	0	0	6	0	0	0	0	0	0	0	0	0	0	0	0	0	0	0	0	0
ERV316A3_3p21.31a	0	0	0	0	0	0	0	0	1	1	0	0	0	0	0	0	0	0	0	0	0	0	1	0	0	0	0	0	0	2	0	44	0	0	0	0	0	0	0	0	0	0	0	1	0	0	0	0	2
ERV316A3_3p21.31b	0	1	0	0	0	0	0	0	0	0	0	0	0	0	0	0	0	1	1	0	0	0	0	2	1	0	0	0	0	1	0	6	0	0	0	0	0	0	0	0	0	1	0	0	0	1	0	5	0
ERV316A3_3p21.31c	0	0	0	0	2	3	0	1	0	3	0	2	1	2	0	0	0	2	0	0	1	0	2	1	1	0	1	0	0	5	3	26	2	0	1	0	0	1	1	2	0	0	2	1	3	2	0	3	3
ERV316A3_3p21.31d	0	0	0	0	0	0	1	0	0	0	0	1	0	0	0	0	2	1	1	1	1	1	0	0	0	0	0	0	2	1	0	36	0	0	1	0	1	0	0	0	0	0	0	0	1	0	0	0	0
ERV316A3_3p21.31e	0	0	0	0	0	0	0	0	0	0	0	0	0	0	0	0	0	0	1	1	0	0	0	0	1	0	0	0	0	0	2	3	0	0	0	0	0	0	0	0	1	0	0	0	1	0	0	1	0
ERV316A3_3p22.3a	0	0	0	0	0	0	0	0	0	0	0	0	0	0	0	0	0	0	0	0	0	0	0	0	0	0	0	0	0	0	0	19	0	0	0	0	0	0	0	0	0	0	0	0	0	0	0	0	0
ERV316A3_3p22.3b	0	0	0	0	0	0	0	0	0	0	0	0	0	0	0	0	0	0	0	0	0	0	0	0	0	0	0	0	0	0	0	6	0	0	0	0	0	0	0	0	0	0	0	0	0	0	0	0	0
ERV316A3_3p24.1	0	0	0	0	0	0	0	0	0	0	0	0	0	0	0	0	0	2	0	0	0	0	1	0	0	0	0	0	0	0	0	10	0	0	2	0	1	0	0	0	0	0	0	0	0	0	0	0	3
ERV316A3_3p24.2	0	0	0	1	0	0	0	0	0	0	0	0	0	0	0	0	0	0	0	1	0	0	0	0	0	0	0	1	0	0	0	19	0	0	0	0	0	0	0	0	0	0	0	0	0	1	0	0	2
ERV316A3_3p25.1	0	0	0	0	0	0	0	0	0	0	0	0	0	0	0	0	0	0	0	0	0	0	0	0	0	0	0	0	0	0	0	20	0	0	0	0	0	0	0	0	0	0	0	0	0	0	0	1	0
ERV316A3_3p25.2a	0	0	0	4	12	0	1	2	0	2	0	3	0	11	7	1	2	4	7	16	1	2	8	14	3	10	2	4	24	14	17	8	11	3	1	2	4	1	4	3	6	8	1	4	15	4	6	6	8
ERV316A3_3p25.2b	0	0	0	0	0	0	0	0	0	0	0	0	0	0	0	0	0	0	0	0	0	0	1	0	0	0	0	0	0	0	0	9	0	0	0	0	0	0	0	0	0	0	0	0	0	0	0	0	0
ERV316A3_3p25.2c	0	0	0	0	0	0	0	0	0	0	0	0	0	0	0	0	0	0	2	0	0	0	0	0	0	0	0	0	0	0	0	12	0	0	0	0	0	0	0	0	0	0	0	0	0	0	0	0	0
ERV316A3_3p25.2d	0	0	0	0	0	0	0	0	0	1	0	0	0	0	0	0	0	0	0	0	0	0	0	0	0	0	0	0	0	1	0	43	0	0	0	0	2	0	0	0	0	4	0	1	1	0	0	0	0
ERV316A3_3p26.1	0	0	0	0	0	0	0	0	0	0	0	0	0	0	0	0	0	0	0	0	0	2	0	0	0	0	0	0	0	0	0	29	0	0	0	0	0	0	1	0	0	0	0	0	0	0	0	0	0
ERV316A3_3p26.3	0	0	0	0	0	0	0	0	0	0	0	0	0	0	0	0	0	0	0	0	0	0	1	0	0	0	0	0	0	0	0	2	0	0	0	0	0	0	0	0	0	0	0	0	0	0	0	0	0
ERV316A3_3q11.2a	0	0	0	0	0	0	0	0	0	0	0	0	0	0	0	0	0	0	0	0	0	0	0	0	0	0	0	0	0	0	0	31	0	0	0	0	0	0	0	0	0	0	1	0	0	0	0	0	0
ERV316A3_3q11.2b	0	0	0	0	0	0	0	0	0	0	0	0	0	0	0	0	0	0	0	0	0	0	1	0	0	0	0	0	0	0	0	21	0	0	0	0	0	0	0	0	0	0	0	0	0	0	0	1	0
ERV316A3_3q11.2c	0	0	0	0	0	0	0	0	0	0	0	0	0	0	0	0	0	0	0	0	0	0	0	0	0	0	0	0	0	0	0	5	0	0	0	0	0	0	0	0	0	0	0	0	0	0	0	0	0
ERV316A3_3q11.2d	0	0	0	0	0	0	0	0	0	0	0	0	0	0	0	0	0	0	0	0	0	0	0	0	0	0	0	0	0	0	0	17	0	0	0	0	0	0	0	0	0	0	0	0	0	0	0	0	0
ERV316A3_3q11.2e	0	0	0	0	0	0	0	0	0	0	0	0	0	0	0	0	0	0	0	0	0	0	1	0	0	0	0	0	0	0	0	16	0	0	0	0	0	0	2	0	0	0	0	0	0	0	0	0	0
ERV316A3_3q11.2f	0	0	0	0	0	0	0	0	0	0	0	0	0	0	0	0	0	0	0	0	0	0	0	0	0	0	0	0	0	0	0	9	0	0	0	0	0	0	1	0	0	0	0	0	0	0	0	0	0
ERV316A3_3q11.2g	0	0	0	0	0	0	0	0	0	0	0	0	0	0	0	0	0	0	0	0	0	0	2	0	0	0	0	0	0	0	0	26	0	0	0	0	0	0	0	0	0	0	0	0	0	0	0	0	0
ERV316A3_3q12.1a	0	2	0	0	0	0	0	0	0	0	0	0	0	0	0	0	0	0	0	0	0	0	1	0	0	0	0	0	0	0	0	37	0	0	0	0	0	0	0	0	0	0	0	0	0	0	0	0	0
ERV316A3_3q12.1b	0	0	0	0	0	0	0	1	1	0	0	0	0	0	1	0	0	0	0	0	0	0	0	0	0	0	0	0	0	0	0	12	0	0	0	0	0	0	0	0	0	0	0	0	0	0	0	0	0
ERV316A3_3q12.1c	0	0	0	0	0	5	0	0	0	0	0	0	0	0	0	0	0	0	0	0	1	0	0	0	0	0	1	0	0	0	0	27	0	0	0	0	1	0	0	0	1	0	0	0	0	0	1	13	1
ERV316A3_3q12.1d	0	1	0	3	0	0	0	7	1	1	0	5	4	6	1	0	3	5	0	8	9	4	1	0	1	1	1	13	7	5	14	27	52	0	3	0	4	9	1	0	3	1	2	3	6	0	4	37	0
ERV316A3_3q12.3	1	0	0	0	0	0	0	0	0	0	0	1	0	0	0	0	0	0	0	0	0	0	0	0	0	0	0	2	0	0	0	3	0	0	0	0	0	0	0	0	0	0	0	0	0	0	0	1	0
ERV316A3_3q13.11a	0	0	0	0	0	0	0	0	0	0	0	0	0	0	0	0	0	0	0	0	0	0	1	0	0	0	0	0	0	0	0	16	0	0	0	0	0	0	0	0	0	0	0	0	0	0	0	0	0
ERV316A3_3q13.11b	0	0	0	0	0	0	0	0	0	0	0	0	0	0	0	0	0	0	0	0	0	0	0	0	0	0	0	0	0	0	0	8	0	0	0	0	0	0	0	0	0	0	0	0	0	0	0	0	0
ERV316A3_3q13.11c	0	0	0	0	0	0	0	0	0	0	0	0	0	0	0	0	0	0	0	0	0	0	0	0	0	0	0	0	0	0	0	10	0	0	0	0	0	0	0	0	0	0	0	0	0	0	0	0	0
ERV316A3_3q13.11d	0	0	0	0	0	0	0	0	0	0	0	0	0	0	0	0	0	0	0	0	0	0	0	0	0	0	0	0	0	0	0	18	0	0	0	0	0	0	0	0	0	0	0	0	0	0	0	0	0
ERV316A3_3q13.11e	0	0	0	0	0	0	0	0	0	0	0	0	0	0	0	0	0	0	0	0	0	0	0	0	0	0	0	0	0	0	0	15	0	0	0	0	0	0	0	0	0	1	0	0	0	0	0	0	0
ERV316A3_3q13.11f	0	0	0	0	0	0	0	0	0	0	0	0	0	0	0	0	0	0	0	0	0	0	1	0	0	0	0	0	0	0	0	13	0	0	0	0	0	0	0	0	0	0	0	0	0	0	0	0	0
ERV316A3_3q13.11g	1	1	4	0	0	1	2	0	0	2	0	0	0	1	0	0	0	0	0	0	0	2	2	2	0	0	0	5	2	3	0	25	0	5	0	1	1	0	0	2	0	8	1	0	1	1	2	0	1
ERV316A3_3q13.11h	0	0	0	0	0	0	0	0	0	0	0	0	0	0	0	0	0	0	0	0	0	0	0	0	0	0	0	1	1	0	0	23	0	0	0	0	0	0	0	0	0	0	0	0	0	0	2	0	1
ERV316A3_3q13.11i	0	0	0	0	0	0	0	0	0	0	0	0	0	0	0	0	0	0	0	1	0	0	1	0	0	0	0	0	0	0	0	9	0	0	0	0	0	0	0	0	0	0	0	0	0	0	0	0	0
ERV316A3_3q13.12a	0	0	0	0	2	0	0	0	0	0	0	0	0	0	0	0	0	0	0	0	0	0	2	0	0	0	0	0	0	0	0	26	1	0	0	0	0	0	0	0	0	0	0	0	1	0	0	0	0
ERV316A3_3q13.12b	0	0	0	0	0	0	0	0	0	0	0	0	0	0	0	0	0	0	0	0	0	0	0	0	0	0	0	0	0	0	0	7	0	0	0	0	0	0	0	0	0	0	0	0	0	0	0	0	0
ERV316A3_3q13.12c	0	12	5	18	21	9	1	15	3	2	2	21	4	18	7	1	10	11	25	32	14	14	14	10	30	27	14	22	32	9	38	9	87	8	23	1	20	34	4	23	22	8	14	1	14	5	23	39	31
ERV316A3_3q13.12d	0	0	2	0	0	0	1	0	0	0	0	0	0	1	0	0	0	0	0	0	0	0	0	2	0	0	0	0	0	0	0	21	1	0	0	0	0	0	0	0	1	0	0	0	1	0	0	0	1
ERV316A3_3q13.12e	0	0	4	1	0	4	0	0	1	1	0	0	2	1	0	0	3	3	1	0	1	5	0	2	5	1	0	2	0	1	0	18	2	4	2	0	1	5	0	2	0	2	0	0	2	0	4	6	0
ERV316A3_3q13.12f	0	0	0	0	0	0	0	0	0	0	0	0	0	0	0	0	0	0	0	0	1	0	3	0	0	0	0	0	1	0	0	30	0	0	0	0	0	0	0	0	0	0	0	0	2	0	0	0	0
ERV316A3_3q13.13a	0	0	0	0	5	0	0	0	0	0	0	0	0	0	0	0	0	0	0	0	0	0	0	0	0	0	0	0	0	0	0	17	2	0	0	0	0	0	0	0	0	1	0	0	0	0	0	0	0
ERV316A3_3q13.13b	0	0	0	1	0	0	0	0	0	0	0	0	0	0	0	0	0	0	0	0	0	0	0	0	0	0	0	0	0	1	1	37	0	4	0	0	0	1	0	2	1	0	0	1	3	0	0	0	2
ERV316A3_3q13.13c	0	1	0	2	0	0	0	0	0	0	0	0	0	0	1	0	1	0	0	0	0	0	0	0	0	0	0	0	0	0	0	7	0	0	0	0	0	0	0	0	0	0	0	0	0	0	0	0	0
ERV316A3_3q13.13d	0	0	0	0	3	0	0	0	0	0	0	0	0	0	1	0	0	0	0	3	0	0	1	0	0	0	0	0	0	0	1	35	4	0	0	0	0	0	0	0	0	0	0	0	0	0	0	2	0
ERV316A3_3q13.13e	0	0	0	0	0	0	0	0	0	0	0	0	0	0	0	0	0	0	0	0	0	0	1	0	0	0	0	0	0	0	0	31	0	0	0	0	0	0	0	0	0	0	0	0	0	0	0	0	0
ERV316A3_3q13.2a	0	0	0	0	0	1	0	1	0	0	0	0	0	1	0	0	3	0	0	2	0	0	1	0	0	0	0	0	1	0	0	19	0	1	0	0	0	0	0	0	0	0	0	0	0	0	0	1	0
ERV316A3_3q13.2b	0	0	0	0	0	0	0	0	0	0	0	0	0	0	0	0	0	0	0	0	0	0	1	0	0	0	0	0	0	0	0	26	0	0	0	0	0	0	0	0	0	0	0	0	0	0	0	0	1
ERV316A3_3q13.31a	0	0	0	0	0	0	0	0	0	0	0	0	0	0	0	0	0	0	0	0	0	0	1	0	0	0	0	0	0	0	0	36	0	0	0	0	0	0	0	0	0	0	0	0	0	0	0	0	1
ERV316A3_3q13.31b	9	0	0	11	22	12	0	12	0	0	1	96	0	28	0	0	0	0	2	34	73	2	11	4	14	0	22	82	152	0	23	55	2	0	6	0	0	22	8	6	61	5	3	4	2	0	6	19	0
ERV316A3_3q13.31c	0	0	0	0	0	0	0	0	0	0	0	0	0	0	0	0	0	0	0	0	0	0	0	0	0	0	0	0	0	0	0	34	0	0	0	0	0	0	0	0	0	0	0	0	0	0	0	0	1
ERV316A3_3q13.32	0	0	0	0	0	0	0	0	0	0	0	0	0	2	0	0	0	0	0	0	0	0	0	0	0	0	0	0	1	0	0	16	0	0	0	0	0	0	1	0	0	0	0	0	0	0	0	0	0
ERV316A3_3q13.33a	0	0	0	0	0	0	0	0	0	0	0	0	0	0	0	0	0	0	0	0	0	0	0	0	0	0	0	0	0	0	1	10	0	0	0	0	0	0	0	0	0	0	0	0	0	0	0	0	0
ERV316A3_3q13.33b	0	0	0	0	0	0	0	0	0	0	0	0	0	0	0	0	0	0	0	4	0	1	0	0	0	0	0	0	4	0	0	32	0	0	0	0	0	0	0	0	0	0	0	0	0	0	9	0	0
ERV316A3_3q22.2a	0	0	0	0	0	0	0	0	0	0	0	0	0	0	0	0	0	0	0	0	0	0	0	0	0	0	0	0	0	0	0	15	0	0	0	0	0	0	0	0	0	0	0	0	0	0	0	0	0
ERV316A3_3q22.2b	2	0	0	0	0	0	0	2	0	0	0	6	0	10	3	0	0	0	0	0	1	0	2	0	1	0	0	0	4	4	8	15	0	0	3	0	4	3	0	0	14	0	2	0	1	0	6	4	0
ERV316A3_3q22.3a	0	0	0	0	0	0	0	0	0	0	0	0	0	0	0	0	0	0	0	0	0	0	1	0	0	0	0	0	0	0	0	40	0	0	0	0	0	0	0	0	0	0	0	0	0	0	0	0	0
ERV316A3_3q22.3b	0	0	0	0	0	0	0	0	0	0	0	0	0	0	0	0	0	0	0	0	0	0	0	0	0	0	0	0	2	0	0	10	0	0	0	0	0	0	0	0	0	0	0	0	0	0	1	0	0
ERV316A3_3q22.3c	0	0	0	0	0	0	0	0	0	0	0	0	0	0	0	0	0	0	0	0	0	0	1	0	0	0	0	0	0	1	0	60	0	0	0	0	0	0	0	0	0	0	0	0	0	0	0	0	0
ERV316A3_3q22.3d	0	1	0	0	0	0	0	0	0	1	0	0	0	0	1	0	0	0	1	1	0	0	0	2	0	0	0	0	1	1	0	31	1	0	0	0	0	2	0	1	1	0	0	0	0	0	0	0	0
ERV316A3_3q23a	0	0	0	0	0	0	0	0	0	0	0	0	0	0	0	0	0	0	0	0	0	0	0	0	0	0	0	0	0	0	0	32	0	0	0	0	0	0	0	0	0	0	0	0	0	0	0	0	0
ERV316A3_3q23b	0	0	0	0	0	0	0	0	0	0	0	0	0	0	20	0	0	0	0	0	1	0	1	0	0	0	0	0	0	0	0	18	0	0	0	0	0	0	0	0	0	0	0	0	0	0	0	0	0
ERV316A3_3q24a	2	1	0	0	0	3	0	0	0	0	0	0	0	1	0	0	1	0	0	1	0	0	2	0	0	0	0	0	2	0	0	20	0	0	0	0	0	0	1	0	0	0	0	1	0	0	0	0	0
ERV316A3_3q24b	0	0	0	1	0	0	0	0	0	0	0	0	0	1	0	0	0	0	0	0	0	0	2	1	3	0	0	1	0	1	1	17	0	0	0	1	0	0	0	0	0	0	0	0	0	0	0	1	0
ERV316A3_3q24c	0	0	0	0	0	0	0	0	0	0	0	0	0	0	0	0	0	0	0	0	0	0	0	0	0	0	0	0	0	1	0	11	0	0	0	0	0	0	0	0	0	0	0	0	0	0	0	0	0
ERV316A3_3q24d	0	0	0	0	0	0	0	0	0	0	0	0	0	0	0	0	0	0	0	0	0	0	2	0	0	0	0	0	0	0	0	29	0	0	0	0	0	0	0	0	0	0	0	0	0	0	0	0	0
ERV316A3_3q25.2a	5	1	0	0	1	5	4	4	1	12	0	3	0	2	4	0	4	3	1	8	3	1	9	4	3	0	8	0	11	7	4	36	0	3	3	0	1	9	1	1	4	2	2	1	4	0	0	0	2
ERV316A3_3q25.2b	0	27	6	0	2	18	50	1	6	88	0	0	0	0	5	0	6	1	0	25	21	5	2	10	1	0	0	1	2	2	0	21	0	9	0	0	0	0	5	0	2	3	0	1	2	0	4	0	0
ERV316A3_3q25.2c	0	43	5	2	1	18	137	5	30	158	0	0	0	1	14	5	13	4	0	59	6	8	8	13	0	0	0	1	1	2	0	28	0	15	0	0	0	0	10	1	2	1	1	3	3	0	3	0	0
ERV316A3_3q25.31	0	0	0	0	1	0	0	0	0	0	0	0	0	0	0	0	0	0	0	0	0	0	3	0	0	0	0	0	0	0	0	10	0	0	0	0	0	0	0	0	0	1	0	0	0	0	0	0	0
ERV316A3_3q25.32a	0	0	0	0	0	0	0	0	0	0	0	0	0	0	0	0	0	1	0	0	0	0	0	0	0	0	0	0	0	0	0	26	0	0	2	0	0	0	0	0	0	0	0	0	0	0	1	0	0
ERV316A3_3q25.32b	0	0	0	0	0	0	0	0	0	0	0	0	0	0	0	0	0	0	0	0	0	0	0	1	0	0	0	0	0	0	0	17	0	0	0	0	0	0	0	0	0	0	0	0	0	0	0	0	0
ERV316A3_3q26.1a	0	0	0	0	0	0	0	0	0	0	0	0	0	0	0	0	0	0	0	0	0	0	0	0	0	0	0	0	0	0	0	9	0	0	0	0	0	0	0	0	0	0	0	0	0	0	0	0	0
ERV316A3_3q26.1b	0	0	0	0	0	0	0	0	0	0	0	0	0	0	0	0	0	0	0	0	0	0	0	0	0	0	0	0	0	0	0	8	1	0	0	0	0	0	0	0	0	0	0	0	0	0	0	0	0
ERV316A3_3q26.1c	0	0	0	0	0	0	0	0	0	0	0	0	0	0	0	0	0	0	0	0	0	0	0	0	0	0	0	0	0	0	0	5	0	0	0	0	0	0	0	0	0	0	0	0	0	0	0	0	0
ERV316A3_3q26.1d	0	0	0	0	0	0	0	0	0	0	0	0	0	5	0	0	0	0	0	0	0	0	1	0	0	0	0	0	1	0	2	17	0	0	0	0	0	0	0	0	0	0	0	0	0	0	1	0	0
ERV316A3_3q26.1e	0	0	1	0	0	0	0	0	0	0	0	0	0	2	1	0	4	0	0	4	0	0	0	1	0	0	0	0	1	0	0	14	0	0	0	0	1	1	2	0	1	0	0	0	0	0	0	1	0
ERV316A3_3q26.1f	0	0	0	0	0	0	0	0	0	0	0	0	0	0	0	0	0	0	0	0	0	0	1	0	0	0	25	0	0	0	0	8	0	0	0	0	0	0	0	0	0	0	0	0	2	0	0	7	0
ERV316A3_3q26.1g	0	0	0	0	0	0	0	0	0	0	0	0	0	0	0	0	0	0	0	0	0	0	2	0	0	0	0	0	0	0	0	33	0	0	0	0	0	0	0	0	0	0	0	0	0	0	0	0	0
ERV316A3_3q26.1h	0	0	0	0	0	0	0	0	0	0	0	0	0	0	0	0	0	0	0	0	0	0	0	0	0	0	0	0	0	0	0	8	0	0	0	0	0	0	0	0	0	0	0	0	0	0	0	0	0
ERV316A3_3q26.2a	0	0	0	0	0	0	0	0	0	0	0	0	0	0	0	0	0	0	0	0	0	0	1	0	0	0	0	0	0	0	0	8	0	0	0	0	0	0	0	0	0	0	0	0	0	0	0	0	0
ERV316A3_3q26.2b	0	2	1	0	0	0	1	1	0	0	1	0	1	5	3	0	1	1	2	8	3	2	1	1	0	0	0	1	1	5	1	41	0	0	1	0	1	0	0	3	1	1	4	0	2	0	0	1	0
ERV316A3_3q26.31	0	0	0	1	4	1	0	1	0	10	0	0	0	7	1	0	0	0	1	1	2	0	1	0	0	0	0	0	2	6	0	9	0	1	0	0	3	0	0	0	11	0	1	0	0	2	2	8	0
ERV316A3_3q26.32	0	0	0	0	0	0	0	0	0	0	0	0	0	0	0	0	0	0	0	0	0	0	0	0	0	0	0	0	0	0	0	36	0	0	0	0	0	0	0	0	0	0	0	0	0	0	0	0	0
ERV316A3_3q26.33	0	0	0	2	0	0	0	0	0	0	0	0	0	0	0	0	0	0	0	0	0	2	0	0	0	0	0	0	0	0	0	9	0	0	0	0	0	0	0	0	0	0	0	0	0	0	0	0	0
ERV316A3_3q27.1a	1	0	0	1	17	0	2	0	1	2	0	1	2	0	0	3	1	0	8	1	0	0	6	3	4	0	0	2	0	0	4	21	0	1	0	3	1	0	3	5	16	1	0	3	17	5	14	3	45
ERV316A3_3q27.1b	0	0	0	1	0	0	0	0	0	0	0	0	0	1	0	0	0	1	0	1	0	0	0	0	1	0	4	1	0	0	0	17	0	0	3	0	0	0	0	0	0	0	0	0	0	0	0	0	0
ERV316A3_3q27.1c	0	0	0	0	0	0	0	0	0	0	0	0	0	0	0	0	0	0	0	0	0	0	0	0	0	0	0	0	0	0	1	3	0	0	0	0	0	0	0	0	0	0	0	0	0	0	0	0	0
ERV316A3_3q27.2	0	0	0	0	0	0	0	0	0	0	0	0	0	0	1	0	0	0	0	0	0	0	0	0	0	0	0	0	0	0	0	11	0	0	0	0	0	0	0	0	0	0	0	0	0	0	0	0	0
ERV316A3_3q27.3a	0	0	0	0	0	0	0	0	0	0	0	0	0	0	0	0	0	0	0	0	0	0	0	0	0	0	0	0	0	0	0	16	0	0	0	0	0	0	0	0	0	0	0	0	0	0	0	0	0
ERV316A3_3q27.3b	0	0	0	0	0	0	0	0	0	0	0	0	0	0	0	0	0	0	0	0	0	0	1	0	0	0	0	0	0	0	0	26	0	0	0	0	0	0	0	0	0	0	0	0	0	0	0	0	0
ERV316A3_3q27.3c	0	0	0	0	1	4	0	1	0	2	0	5	0	5	3	0	0	5	2	4	1	0	18	53	5	0	0	0	1	10	1	3	1	1	1	0	0	2	4	0	2	0	1	3	0	0	15	0	0
ERV316A3_3q27.3d	0	0	0	0	1	1	2	3	0	0	0	0	0	6	0	0	0	0	0	2	0	0	0	1	0	0	0	1	2	1	2	27	1	0	0	1	0	1	0	0	0	1	0	0	7	0	1	2	0
ERV316A3_3q27.3e	14	5	1	2	5	0	16	10	2	25	0	51	3	36	8	6	6	1	19	11	6	0	25	37	3	10	10	4	1	3	76	40	10	9	10	10	7	18	3	12	11	6	5	3	8	8	7	2	13
ERV316A3_3q28a	0	0	0	0	1	0	0	0	0	0	0	3	0	0	0	0	0	1	0	0	0	0	0	0	0	0	0	1	1	0	0	5	0	0	0	0	0	0	0	0	1	0	0	0	0	0	0	0	0
ERV316A3_3q28b	0	0	0	0	0	0	1	0	0	0	0	1	0	0	0	0	0	0	0	0	1	0	3	0	1	0	0	1	4	0	0	16	0	0	0	0	0	0	2	0	5	0	0	0	0	0	1	0	0
ERV316A3_3q28c	0	3	0	0	0	2	0	0	0	4	0	20	0	0	0	0	0	3	0	1	0	0	3	0	0	0	0	1	8	0	0	45	1	0	1	0	0	1	0	0	3	0	2	1	0	0	0	0	0
ERV316A3_3q28d	5	0	0	0	1	1	1	11	0	0	0	0	0	2	0	0	0	0	0	0	0	0	0	0	1	0	1	55	2	74	3	39	0	0	0	0	45	0	0	19	194	2	4	0	1	0	0	3	0
ERV316A3_3q28e	0	0	0	0	0	0	0	0	0	0	0	0	0	0	0	0	0	0	0	0	0	0	0	0	0	0	0	2	1	2	0	25	0	0	0	0	0	0	0	0	1	0	0	0	0	0	1	1	0
ERV316A3_3q28f	0	0	0	0	0	0	0	0	0	0	0	0	0	0	0	0	0	0	0	0	0	0	0	0	0	0	0	0	0	0	0	8	0	0	0	0	0	0	0	0	0	0	0	0	0	0	3	0	0
ERV316A3_3q28g	0	0	0	2	0	0	0	0	0	0	0	0	0	0	0	0	0	0	0	0	0	0	0	0	0	0	0	1	0	0	1	15	5	0	0	0	0	0	0	0	0	0	0	0	0	0	5	1	0
ERV316A3_3q28h	0	0	0	0	0	0	0	0	0	0	0	0	0	0	0	0	0	0	0	0	0	0	0	0	0	0	0	0	0	0	0	2	0	0	0	0	0	0	0	0	0	0	0	0	3	0	1	0	0
ERV316A3_3q28i	0	0	0	0	0	0	0	0	0	0	0	0	0	0	0	0	0	0	0	0	0	0	0	0	0	0	0	0	0	0	11	2	0	0	0	0	0	0	0	0	0	0	0	0	0	0	0	0	0
ERV316A3_3q29	0	4	0	0	1	0	3	0	0	1	1	4	0	4	0	2	0	3	0	0	1	1	3	4	5	1	1	3	5	3	1	5	1	4	1	3	0	1	0	2	6	3	3	1	13	0	0	1	4
ERV316A3_4p12a	0	0	1	0	0	3	0	0	0	0	0	0	0	0	2	0	0	2	1	0	0	0	1	0	0	0	0	0	0	1	0	37	0	0	0	1	0	0	0	0	1	0	0	0	0	0	1	1	0
ERV316A3_4p12b	0	0	0	0	0	0	0	0	0	0	0	0	0	0	0	0	0	0	0	0	0	0	0	0	0	0	0	0	0	0	0	13	0	0	0	0	0	0	0	0	0	0	0	0	0	0	0	0	0
ERV316A3_4p12c	0	0	0	0	0	0	0	0	0	0	0	0	0	0	0	0	0	0	0	0	0	0	0	0	0	0	0	0	0	0	0	6	0	0	0	0	0	0	0	0	0	0	0	0	0	0	0	0	0
ERV316A3_4p12d	0	0	0	0	0	0	0	0	0	0	0	0	0	0	0	0	0	0	0	0	0	0	1	0	0	0	0	0	0	0	0	27	0	0	0	0	0	0	0	0	0	0	0	0	0	0	7	0	0
ERV316A3_4p12e	0	0	0	0	0	0	0	0	0	0	0	0	0	0	0	0	0	0	0	0	0	0	0	0	0	0	0	0	0	0	0	20	0	0	0	0	0	0	0	0	0	0	0	0	0	0	1	0	0
ERV316A3_4p12f	0	0	0	0	0	0	0	0	0	0	0	0	0	0	0	0	0	0	0	0	0	0	0	0	0	0	0	0	0	0	0	30	0	0	0	0	0	0	0	0	0	0	0	0	0	0	0	0	0
ERV316A3_4p12g	0	2	1	0	0	0	5	5	1	3	0	0	0	1	0	0	0	0	0	2	1	0	1	1	0	6	2	0	3	5	1	44	1	2	2	3	1	0	0	1	2	1	1	0	3	2	0	1	0
ERV316A3_4p13a	0	0	0	0	0	0	0	0	0	0	0	0	0	0	0	0	0	0	0	0	0	0	2	0	0	0	0	0	0	0	0	42	0	0	0	0	0	0	0	0	0	0	0	0	0	0	0	0	0
ERV316A3_4p13b	0	0	0	0	0	0	0	0	0	0	0	0	0	0	0	0	0	0	0	0	0	0	0	0	0	0	0	0	0	0	0	15	0	0	0	0	0	0	0	0	0	0	0	0	0	0	0	0	0
ERV316A3_4p15.1a	0	0	0	0	0	0	0	0	0	0	0	0	0	0	0	1	0	0	0	0	0	0	1	0	0	0	0	0	0	0	1	6	0	0	0	0	0	0	0	0	0	0	0	0	0	0	4	0	0
ERV316A3_4p15.1b	0	1	0	0	0	0	0	0	0	0	0	0	0	0	2	0	0	0	0	0	0	0	0	0	5	0	0	1	1	0	0	14	0	0	7	1	0	0	0	0	0	0	0	0	0	0	0	0	0
ERV316A3_4p15.1c	0	0	0	0	0	0	0	0	0	0	0	0	0	0	0	0	0	0	0	0	0	0	0	0	0	0	0	0	0	0	0	7	0	0	0	0	0	0	0	0	0	0	0	0	0	0	0	2	0
ERV316A3_4p15.1d	0	0	0	0	0	0	0	0	0	0	0	0	0	0	0	0	0	0	0	0	0	0	0	0	0	0	0	0	0	0	2	25	0	0	0	0	0	0	0	0	0	0	0	0	0	0	0	0	0
ERV316A3_4p15.1e	0	0	0	0	0	0	0	0	0	0	0	0	0	0	0	0	0	0	0	0	0	0	0	0	0	0	0	0	0	0	0	36	0	0	0	0	0	0	0	0	0	0	0	0	0	0	0	0	0
ERV316A3_4p15.1f	0	0	0	0	0	0	0	0	0	0	0	0	0	0	0	0	0	0	0	0	0	0	2	0	0	0	0	0	0	0	0	5	0	0	0	0	0	0	0	0	0	0	0	0	0	0	0	0	0
ERV316A3_4p15.1g	0	0	0	0	0	0	0	0	0	0	0	0	0	0	0	0	0	0	0	0	0	0	0	0	0	0	0	0	0	0	0	17	0	0	0	0	0	0	0	0	0	0	0	0	0	0	0	0	0
ERV316A3_4p15.1h	0	0	0	0	0	0	0	0	0	0	0	0	0	0	0	0	0	0	0	0	0	0	2	0	0	0	0	0	0	0	0	19	0	0	0	0	0	0	0	0	0	0	0	0	0	0	0	0	0
ERV316A3_4p15.1i	0	0	0	0	0	0	0	0	0	0	0	0	0	0	0	0	0	0	0	0	0	0	0	0	0	0	0	0	0	0	0	9	0	0	0	0	0	0	0	0	0	0	0	0	0	0	0	0	0
ERV316A3_4p15.1j	0	0	0	0	0	0	0	0	0	0	0	0	0	0	0	0	0	0	0	0	0	0	0	0	0	0	0	0	0	0	0	18	0	0	0	0	0	0	0	0	0	0	0	0	0	0	0	0	0
ERV316A3_4p15.1k	0	0	0	0	0	3	0	0	0	0	0	4	0	0	0	0	0	0	0	0	0	0	1	0	0	0	0	0	0	0	0	22	21	0	3	0	0	0	0	0	0	0	0	0	0	0	0	7	1
ERV316A3_4p15.1l	0	0	0	0	0	2	0	0	0	0	0	4	0	0	0	0	0	0	0	0	0	0	2	0	0	0	0	0	0	0	0	26	2	0	1	0	0	0	0	0	0	0	0	0	0	0	0	0	0
ERV316A3_4p15.1m	0	0	0	0	0	0	0	0	0	0	0	0	0	1	0	0	0	0	0	0	0	0	0	0	0	0	0	0	0	0	1	9	0	0	0	0	0	0	0	0	0	0	0	0	0	0	0	0	0
ERV316A3_4p15.1n	0	0	0	0	0	0	0	0	0	0	0	0	0	0	0	0	0	0	0	0	0	0	1	0	0	0	0	0	0	0	0	8	0	0	0	0	0	0	0	0	0	0	0	0	0	0	0	0	0
ERV316A3_4p15.1o	0	0	0	0	0	0	0	0	0	0	0	0	0	0	0	0	0	0	0	0	0	0	1	0	0	0	0	0	0	0	0	24	0	0	0	0	0	0	0	0	2	0	0	0	0	1	2	0	0
ERV316A3_4p15.2a	0	0	0	0	0	0	0	0	0	0	0	0	0	0	0	0	0	0	0	0	0	0	1	0	0	0	0	0	0	0	0	30	0	0	0	0	0	0	0	0	0	0	0	0	0	0	0	1	0
ERV316A3_4p15.2b	0	0	0	0	0	0	0	0	0	0	0	0	0	0	0	0	0	0	0	0	0	0	0	0	0	0	0	0	0	0	0	5	0	0	0	0	0	0	0	0	0	0	0	0	0	0	0	0	0
ERV316A3_4p15.2c	0	0	0	0	0	0	1	3	0	0	0	0	0	1	0	0	0	0	0	0	0	0	0	0	0	0	0	0	0	2	0	14	0	0	0	0	1	0	0	0	1	0	1	0	0	0	0	0	0
ERV316A3_4p15.2d	2	0	0	0	0	0	1	1	0	0	0	0	0	0	0	0	0	1	1	0	0	0	1	0	0	0	0	0	1	3	1	15	0	0	0	1	1	0	0	0	1	0	0	1	1	4	2	0	0
ERV316A3_4p15.2e	0	0	0	0	0	0	0	0	0	0	0	0	0	0	0	2	0	0	0	0	0	0	0	0	0	1	0	0	5	2	0	31	0	0	0	0	0	0	0	0	1	0	1	0	2	0	0	0	0
ERV316A3_4p15.2f	0	0	0	0	0	0	0	0	0	0	0	0	0	0	0	0	0	0	0	0	0	0	0	0	0	0	0	0	0	0	1	11	0	0	0	0	0	0	0	0	0	0	0	0	0	0	0	0	0
ERV316A3_4p15.2g	0	0	0	0	0	0	0	0	0	0	0	0	0	0	0	0	0	0	0	0	0	0	3	0	0	0	0	0	0	0	0	23	0	0	0	0	0	0	0	0	0	0	0	0	0	0	0	0	0
ERV316A3_4p15.2h	0	0	0	0	0	0	0	0	0	0	0	0	0	0	0	0	0	0	0	0	0	0	2	0	0	0	0	0	0	0	0	28	0	0	0	0	0	0	0	0	0	0	0	0	0	0	0	0	0
ERV316A3_4p15.31a	0	0	0	0	0	0	0	0	0	0	0	0	0	2	0	0	0	0	0	0	0	0	0	0	0	0	0	0	0	0	0	16	0	0	0	0	0	0	0	0	0	0	0	0	0	0	0	0	0
ERV316A3_4p15.31b	0	0	0	0	0	0	0	0	0	0	0	0	0	0	0	0	0	0	0	0	0	0	0	0	0	0	0	0	0	0	0	12	0	0	0	0	0	0	0	0	0	0	0	0	0	0	0	0	0
ERV316A3_4p15.32a	0	0	0	0	0	0	0	0	0	0	0	0	0	1	0	0	0	0	0	0	0	0	0	0	0	0	0	0	0	0	0	7	2	0	0	0	0	0	0	1	0	0	0	0	0	0	0	1	0
ERV316A3_4p15.32b	75	111	105	228	308	43	92	139	49	106	25	132	45	253	115	61	84	273	103	97	187	205	203	188	54	303	54	121	399	126	218	41	206	120	169	73	89	110	82	146	203	103	136	74	260	192	124	240	317
ERV316A3_4p15.33a	0	0	0	0	0	0	0	0	0	0	0	7	0	0	0	1	0	0	0	0	0	0	1	0	0	0	0	0	0	1	2	21	12	0	0	0	0	0	0	0	1	0	0	0	0	0	0	0	0
ERV316A3_4p15.33b	0	0	0	0	0	0	0	0	0	0	0	0	0	0	0	0	0	0	0	0	0	0	1	0	0	0	0	0	0	0	0	8	1	0	0	0	0	0	0	0	0	1	0	0	1	0	0	0	0
ERV316A3_4p15.33c	0	0	0	0	0	0	0	0	0	0	0	0	0	0	0	0	0	0	0	0	0	0	0	0	0	0	0	0	0	0	0	10	0	0	0	0	0	0	0	0	0	0	0	0	0	0	0	0	0
ERV316A3_4p15.33d	0	0	0	0	0	0	0	0	0	0	0	0	0	0	0	0	0	0	0	0	0	0	0	0	0	0	0	0	0	0	1	15	0	0	0	0	0	0	0	0	0	0	0	0	0	0	0	0	0
ERV316A3_4p15.33e	0	0	0	0	0	0	0	0	1	0	0	0	0	0	0	0	0	0	0	0	0	0	0	0	0	0	0	0	0	0	0	4	0	0	0	0	0	0	0	0	0	0	0	0	0	0	0	0	0
ERV316A3_4p15.33f	0	0	0	0	0	0	0	0	0	0	0	0	0	0	0	0	0	0	0	0	0	0	2	0	0	0	0	0	0	0	0	40	0	0	0	0	0	0	0	0	0	0	0	0	0	0	0	0	0
ERV316A3_4p15.33g	0	0	0	0	0	0	0	0	0	0	0	0	0	0	0	0	0	0	1	0	0	0	0	1	0	0	0	0	0	0	0	14	0	0	0	0	0	0	0	0	0	0	2	0	1	0	0	0	0
ERV316A3_4p16.1a	4	0	0	2	0	0	0	1	0	0	0	0	0	0	1	2	1	0	0	0	3	1	2	6	1	0	0	0	3	1	3	10	2	0	1	0	0	0	1	2	2	0	1	0	0	3	10	6	1
ERV316A3_4p16.1b	0	0	0	0	0	0	0	0	0	0	0	0	0	0	0	0	0	0	0	0	0	0	0	0	0	0	0	0	0	0	1	13	0	0	0	0	0	0	0	0	0	0	0	0	3	0	0	0	0
ERV316A3_4p16.1c	0	0	0	0	0	0	0	0	0	0	0	0	0	0	0	0	0	0	0	0	0	0	1	0	0	0	0	0	0	0	0	24	0	0	0	0	0	0	0	0	0	0	0	0	0	0	0	1	0
ERV316A3_4p16.1d	0	0	0	2	0	0	0	0	0	0	0	0	0	2	0	0	1	0	0	0	0	0	2	0	0	1	2	0	1	1	0	18	2	0	0	0	0	0	1	0	1	0	0	0	0	0	0	0	0
ERV316A3_4p16.1e	3	0	0	0	0	0	0	0	0	0	0	0	0	0	0	0	0	0	0	0	0	1	0	0	1	0	0	0	0	0	2	3	0	0	0	0	0	0	0	0	0	0	0	0	0	0	0	0	0
ERV316A3_4p16.1f	1	4	0	2	0	1	0	1	0	0	0	2	1	10	0	0	0	0	0	0	1	1	1	0	0	2	1	0	1	4	1	11	4	1	0	0	3	0	1	0	1	0	4	0	0	0	0	3	1
ERV316A3_4p16.1g	0	0	0	2	2	0	0	1	0	0	0	3	0	4	2	0	0	0	0	0	1	1	3	0	3	3	4	0	8	3	9	25	8	0	0	0	0	0	4	1	2	0	0	1	2	1	1	5	0
ERV316A3_4p16.3a	0	1	0	1	1	0	0	0	0	0	0	0	0	0	0	0	1	1	1	0	0	0	1	2	0	0	0	1	0	0	0	39	0	0	0	0	0	0	0	0	2	0	1	0	3	1	1	0	0
ERV316A3_4p16.3b	0	0	0	2	0	0	0	0	1	1	0	0	0	3	0	0	1	0	0	2	0	1	0	0	1	1	0	0	1	0	1	8	7	0	0	0	0	0	0	0	0	0	1	0	0	0	0	0	0
ERV316A3_4q12	0	0	0	0	1	0	0	0	0	0	0	0	0	0	0	0	0	0	0	0	0	0	1	0	0	0	0	0	0	0	0	8	0	0	0	0	0	0	0	0	0	0	0	0	0	0	0	0	0
ERV316A3_4q13.1a	0	0	0	0	0	0	0	0	0	0	0	0	0	0	0	0	0	0	0	0	0	0	0	0	0	0	0	0	0	0	0	32	0	0	0	0	0	0	0	0	0	0	0	0	0	0	0	0	0
ERV316A3_4q13.1b	0	0	0	1	0	0	0	0	0	0	0	0	0	0	0	0	0	0	0	0	0	0	0	0	0	0	0	0	0	0	0	27	1	0	0	0	0	0	0	0	0	0	0	0	0	0	0	0	0
ERV316A3_4q13.1c	0	0	0	0	0	0	0	0	0	0	0	0	0	0	0	0	0	0	0	0	0	0	0	0	0	0	0	0	0	0	0	43	0	0	0	0	0	0	0	0	0	0	0	0	0	0	0	0	0
ERV316A3_4q13.1d	0	0	0	0	0	0	0	0	0	0	0	0	0	0	0	0	0	0	0	0	0	0	1	0	0	0	0	0	0	0	0	19	0	0	0	0	0	0	0	0	0	0	0	0	0	0	0	0	0
ERV316A3_4q13.1e	0	0	0	0	0	0	0	0	0	0	0	0	0	0	0	0	0	0	0	0	0	0	0	0	0	0	0	0	0	0	0	8	0	0	0	0	0	0	0	0	0	0	0	0	0	0	0	0	0
ERV316A3_4q13.1f	0	0	0	0	0	0	0	0	0	0	0	0	0	0	0	0	0	0	0	0	0	0	0	0	0	0	0	0	0	0	0	4	0	0	0	0	0	0	0	0	0	0	0	0	0	0	0	0	0
ERV316A3_4q13.1g	0	0	0	0	0	0	0	0	0	0	0	0	0	0	0	0	0	0	0	0	0	0	1	0	0	0	0	0	0	0	0	11	0	0	0	0	0	0	0	0	0	0	0	0	0	0	1	0	0
ERV316A3_4q13.1h	0	0	0	0	0	0	0	0	0	0	0	0	0	0	0	0	0	0	0	0	0	0	0	0	0	0	0	1	0	0	0	22	0	0	0	0	0	0	0	0	0	0	0	0	0	0	0	0	0
ERV316A3_4q13.1i	0	0	1	0	0	0	0	0	0	0	0	0	2	0	0	0	0	0	0	0	0	3	0	0	1	0	0	0	0	0	0	42	0	0	0	0	0	0	0	0	0	0	0	0	0	0	0	0	0
ERV316A3_4q13.1j	0	0	0	1	0	0	0	0	0	0	0	0	0	0	0	0	0	0	0	0	0	0	1	0	0	0	0	0	0	0	0	12	0	0	0	0	0	0	0	0	0	0	0	0	0	0	0	0	0
ERV316A3_4q13.1k	12	0	0	0	0	0	0	0	0	0	0	2	0	2	0	0	0	0	0	0	0	0	1	0	0	0	0	0	0	0	0	41	1	0	0	0	0	0	0	0	0	1	0	0	0	0	0	4	0
ERV316A3_4q13.1l	0	0	0	4	1	1	0	5	0	0	0	6	0	4	0	0	1	0	0	0	0	1	0	0	0	1	1	1	3	1	1	26	0	0	0	0	0	0	0	0	3	0	1	0	1	0	1	1	0
ERV316A3_4q13.1m	0	0	0	0	0	0	0	0	0	0	0	0	0	1	0	0	0	0	0	0	0	1	0	0	0	0	0	0	0	0	0	20	0	0	0	0	0	0	0	0	0	0	0	0	0	0	0	0	0
ERV316A3_4q13.2a	0	1	0	0	0	0	0	0	0	0	0	0	0	1	0	0	0	0	0	0	0	0	1	0	0	0	0	0	0	0	0	10	4	0	0	0	0	0	0	0	0	0	2	0	0	0	0	0	0
ERV316A3_4q13.2b	1	5	2	2	3	2	0	14	1	0	0	0	0	12	2	0	0	0	0	0	0	4	0	1	0	5	1	0	0	0	0	10	6	1	0	0	3	0	0	0	3	1	4	0	6	0	0	10	0
ERV316A3_4q13.2c	0	0	0	0	0	0	0	0	0	0	0	0	0	0	0	0	0	0	0	0	0	0	0	0	0	0	0	0	0	0	0	6	0	0	0	0	0	0	0	0	0	0	0	0	0	0	0	0	0
ERV316A3_4q13.2d	0	0	0	0	0	0	0	0	0	0	0	0	0	0	0	0	0	0	0	0	0	0	2	0	0	0	0	0	0	0	0	31	0	0	0	0	0	0	0	0	0	0	0	0	0	0	0	0	0
ERV316A3_4q13.2e	0	0	0	0	0	0	0	1	0	0	0	0	0	1	0	0	0	0	0	0	0	0	0	0	0	0	0	0	1	0	0	26	0	0	0	0	1	0	0	0	1	1	0	0	1	0	1	0	1
ERV316A3_4q13.2f	0	0	3	0	0	0	1	0	0	0	0	0	0	0	0	0	0	0	0	0	0	1	2	0	0	0	0	0	0	0	0	10	0	0	0	0	0	0	3	0	0	0	0	0	0	0	0	0	0
ERV316A3_4q13.2g	0	0	0	0	0	0	0	0	0	0	0	0	0	0	0	0	0	0	0	0	0	0	0	0	0	0	0	0	0	0	0	12	0	0	0	0	0	0	0	0	0	0	0	0	0	0	0	0	0
ERV316A3_4q13.3a	0	0	0	0	0	0	0	0	0	0	0	0	3	0	0	0	0	0	0	0	0	0	1	0	0	0	0	0	0	0	0	22	0	0	0	1	0	0	1	0	3	1	0	0	0	0	2	0	0
ERV316A3_4q13.3b	0	0	0	0	0	0	0	0	0	0	0	0	0	0	0	0	0	0	0	0	0	0	0	0	0	0	0	0	0	0	0	0	0	0	0	0	0	0	0	0	0	0	0	0	0	0	0	0	0
ERV316A3_4q13.3c	0	0	0	4	0	0	0	0	0	0	0	0	0	0	0	0	0	0	0	0	0	0	0	0	0	0	0	0	0	0	0	3	0	0	0	0	0	0	0	0	0	0	0	0	0	0	0	0	0
ERV316A3_4q13.3d	0	1	1	0	9	1	0	2	1	1	0	1	1	0	0	0	0	0	1	1	0	0	0	0	0	0	1	0	0	0	13	20	9	0	0	4	4	0	0	2	6	0	2	0	4	0	3	0	0
ERV316A3_4q13.3e	0	0	0	0	0	0	0	0	0	0	0	0	0	0	0	0	0	0	0	0	0	0	0	0	0	0	0	1	0	0	0	32	0	0	0	0	0	0	0	0	1	0	0	0	0	0	0	0	0
ERV316A3_4q21.1a	0	2	0	3	5	0	3	1	0	2	0	1	0	6	0	0	3	4	0	1	3	0	0	1	0	1	0	0	7	0	0	4	9	0	0	0	1	1	0	0	2	1	2	0	3	1	1	6	1
ERV316A3_4q21.1b	0	0	0	0	0	0	0	0	0	0	0	0	0	0	0	0	0	0	0	0	0	0	1	0	0	0	0	0	0	0	0	11	0	0	0	0	0	0	0	0	0	0	0	0	0	0	0	0	0
ERV316A3_4q21.1c	0	0	0	0	0	0	0	0	0	0	0	0	0	0	0	0	0	0	0	0	0	0	0	0	0	0	0	0	0	0	0	14	0	0	0	0	0	0	0	0	0	0	0	0	0	0	0	0	0
ERV316A3_4q21.1d	0	0	0	0	0	0	0	0	0	0	0	0	0	0	0	0	0	0	0	0	0	0	1	0	0	0	0	0	0	0	0	7	0	0	0	0	0	0	0	0	0	0	0	0	0	0	0	0	0
ERV316A3_4q21.1e	0	0	0	0	0	0	0	0	0	0	0	0	0	0	0	0	0	0	0	0	0	0	1	0	0	0	0	0	0	0	0	9	0	0	0	0	0	0	0	0	0	0	0	0	0	0	0	0	0
ERV316A3_4q21.1f	0	0	0	0	0	0	0	0	0	0	0	0	0	0	0	0	0	0	0	0	0	0	0	0	0	0	0	0	0	0	0	14	0	0	0	0	0	0	0	0	0	0	0	0	0	0	0	0	0
ERV316A3_4q21.1g	0	0	0	0	1	0	0	0	0	0	0	0	0	0	0	0	0	0	0	0	0	0	1	0	0	0	0	0	0	0	0	16	0	0	0	0	0	0	0	0	3	0	0	0	0	0	0	0	0
ERV316A3_4q21.1h	0	0	0	0	1	0	0	0	0	0	0	0	0	0	0	0	0	0	0	0	0	0	1	0	0	0	0	0	0	0	0	11	0	0	0	0	0	1	0	0	0	0	0	0	1	0	0	1	0
ERV316A3_4q21.1i	0	0	0	0	0	0	0	0	0	0	0	0	0	0	0	0	0	0	0	0	0	0	1	0	0	0	0	0	0	0	0	2	0	0	0	0	0	0	0	0	0	0	0	0	0	0	0	0	0
ERV316A3_4q21.1j	0	0	0	0	2	0	0	0	0	0	0	0	0	0	0	0	0	0	0	0	0	0	0	0	0	0	0	0	0	0	0	25	0	0	0	0	0	0	0	0	0	0	0	0	0	0	0	0	0
ERV316A3_4q21.1k	0	0	0	0	2	0	0	0	0	0	0	0	0	0	0	0	0	0	0	0	0	0	0	0	0	0	0	0	0	0	0	6	0	0	0	0	0	0	0	0	2	0	0	0	1	0	0	0	0
ERV316A3_4q21.1l	0	0	0	0	0	0	0	0	0	0	0	0	0	0	0	0	0	0	0	0	0	0	0	0	0	0	0	0	0	0	0	10	0	0	0	0	0	0	0	0	0	0	0	0	0	0	0	0	0
ERV316A3_4q21.1m	1	7	2	1	8	0	0	2	0	2	0	2	0	4	0	0	0	0	1	0	0	0	6	5	2	0	0	0	0	3	1	27	1	0	0	2	2	0	0	0	0	0	1	0	5	0	1	4	0
ERV316A3_4q21.21a	0	0	0	0	0	0	0	0	0	0	0	0	0	0	0	0	0	0	0	0	0	0	1	0	0	0	0	0	0	0	0	29	0	0	0	0	0	0	0	0	0	0	0	0	0	0	0	0	0
ERV316A3_4q21.21b	0	0	0	0	0	0	0	0	0	0	0	0	0	0	0	0	0	0	0	0	0	0	0	0	0	0	0	0	0	0	0	12	0	0	0	0	0	0	0	0	0	1	0	0	0	0	0	0	0
ERV316A3_4q21.21c	0	0	0	1	0	0	0	0	0	0	0	0	0	0	0	0	0	0	0	0	0	0	1	0	5	0	1	0	0	1	0	62	0	0	0	0	0	0	0	0	0	0	0	0	0	0	0	0	0
ERV316A3_4q21.3	0	2	1	0	0	0	0	1	0	6	0	0	0	1	0	1	1	0	0	0	0	0	1	1	0	1	0	2	0	0	2	3	0	0	0	0	0	0	0	0	0	0	2	0	0	0	0	0	1
ERV316A3_4q22.1a	4	16	11	1	0	4	5	15	0	14	1	11	3	16	8	0	5	3	0	8	10	1	5	5	2	1	3	9	3	5	5	12	3	8	2	0	8	11	9	1	20	5	4	1	4	8	0	10	0
ERV316A3_4q22.1b	0	0	0	0	0	0	0	0	0	0	0	0	0	0	0	0	0	0	0	0	0	0	0	0	0	0	0	0	0	0	0	9	0	0	0	0	0	0	0	0	0	0	0	0	0	0	0	0	0
ERV316A3_4q22.1c	0	0	0	0	0	0	0	0	0	0	0	0	0	0	0	0	0	0	0	0	0	0	0	0	0	0	0	0	0	0	10	16	0	0	0	0	0	2	0	0	0	0	0	0	0	0	0	0	0
ERV316A3_4q22.1d	0	0	0	0	1	0	0	0	0	0	0	0	0	0	0	0	0	0	0	0	0	0	1	0	0	0	0	0	0	0	0	7	0	0	1	0	0	1	0	0	0	0	0	0	0	0	1	3	0
ERV316A3_4q22.1e	0	0	0	0	0	0	0	0	0	0	0	0	0	0	0	0	0	0	0	0	0	0	0	0	0	0	0	0	0	0	0	5	0	0	0	0	0	0	0	0	1	0	0	0	0	0	0	0	0
ERV316A3_4q22.3a	0	0	0	0	1	0	0	4	0	1	0	1	0	3	0	1	0	0	0	1	5	0	1	0	0	1	1	4	6	2	0	23	1	0	0	1	1	0	1	0	5	0	1	0	0	0	1	2	0
ERV316A3_4q22.3b	0	0	0	0	0	0	0	0	0	0	0	0	0	0	0	0	0	0	0	0	0	0	1	0	0	0	0	0	1	0	0	28	0	0	0	0	0	0	0	0	0	0	0	0	0	0	0	0	0
ERV316A3_4q22.3c	0	0	0	0	0	0	0	0	0	0	1	0	0	0	0	0	0	0	0	0	0	0	0	0	0	0	0	0	0	0	0	6	2	0	0	0	0	0	0	0	0	0	0	0	0	0	0	0	0
ERV316A3_4q22.3d	0	0	0	8	0	0	0	5	0	0	0	1	0	3	1	0	0	0	0	0	0	0	1	0	0	0	7	3	3	0	4	25	13	0	0	0	0	4	0	0	2	0	1	0	9	0	3	17	1
ERV316A3_4q24a	0	0	0	0	0	0	0	0	0	0	0	0	0	0	0	0	0	0	0	0	0	0	0	0	0	0	0	0	0	0	0	6	0	0	0	0	0	0	0	0	0	0	0	0	0	0	0	0	0
ERV316A3_4q24b	0	0	0	0	0	0	0	0	0	0	0	0	0	0	0	0	0	0	0	0	0	0	1	0	0	0	0	0	0	0	0	20	0	0	0	0	0	0	0	0	0	0	0	0	0	0	0	0	0
ERV316A3_4q24c	0	0	0	0	0	0	0	0	0	0	0	0	0	0	0	0	0	0	0	0	0	0	0	0	0	0	0	0	0	0	0	20	1	0	0	0	0	0	0	0	0	0	0	0	0	0	0	0	0
ERV316A3_4q24d	0	0	4	7	2	0	1	4	1	0	0	0	0	2	0	0	0	0	0	1	1	0	0	0	0	0	0	0	1	1	0	20	2	0	0	0	1	3	0	0	0	1	1	1	4	1	0	0	1
ERV316A3_4q24e	0	1	3	1	1	0	0	0	0	0	0	0	0	1	0	0	0	0	0	0	0	1	0	0	0	0	0	0	2	1	1	22	2	4	0	0	0	1	0	0	3	0	1	0	0	0	0	0	0
ERV316A3_4q24f	0	0	0	0	0	0	0	0	0	0	0	0	0	0	0	0	0	0	0	0	0	0	0	0	0	1	0	0	0	0	0	12	0	0	0	0	1	0	0	0	0	0	0	0	0	0	0	0	0
ERV316A3_4q24g	0	0	0	0	0	0	0	0	0	0	0	0	0	0	0	0	0	0	0	0	0	0	0	0	0	0	0	0	0	0	0	9	0	0	0	0	0	0	0	0	0	0	0	0	0	0	0	0	0
ERV316A3_4q24h	0	0	0	0	0	0	0	0	0	0	0	0	0	0	0	0	0	0	0	0	0	0	0	0	0	0	0	0	0	0	0	12	0	0	0	0	0	0	0	0	0	0	0	0	0	0	0	0	0
ERV316A3_4q24i	0	0	0	0	0	0	0	0	0	0	0	0	0	0	0	0	0	0	0	0	0	0	1	0	0	1	0	0	0	0	0	14	0	0	0	0	0	0	0	0	0	0	0	0	0	0	0	0	0
ERV316A3_4q25a	0	0	0	0	0	0	0	0	0	0	0	0	0	0	0	0	0	0	0	0	0	0	0	1	0	0	1	0	1	0	0	55	0	0	0	0	0	0	0	2	0	1	0	0	0	0	0	0	0
ERV316A3_4q25b	0	1	0	0	0	0	0	0	0	0	0	0	0	0	0	0	0	0	0	0	0	0	1	2	0	0	0	0	0	1	0	4	0	0	0	0	0	0	0	0	0	0	0	0	0	0	0	0	0
ERV316A3_4q25c	0	0	0	0	0	0	0	0	0	0	0	0	0	0	0	0	0	0	0	0	0	0	0	0	0	0	0	0	0	0	0	26	0	0	0	0	0	0	0	0	0	0	0	0	0	0	0	0	0
ERV316A3_4q25d	0	0	1	0	0	0	0	0	0	0	0	0	0	1	0	0	0	0	0	0	0	1	0	0	0	0	0	0	1	0	0	19	0	0	0	1	0	0	0	0	0	1	0	0	2	0	0	0	1
ERV316A3_4q25e	0	0	1	2	0	0	0	0	0	0	0	0	0	0	0	0	0	0	0	0	0	0	0	0	0	0	0	0	0	0	0	8	0	0	0	0	0	0	0	0	1	1	0	1	0	0	0	0	1
ERV316A3_4q26a	0	0	0	0	0	0	0	0	0	1	0	0	0	0	0	0	0	0	0	0	0	0	0	0	0	0	0	0	0	0	0	22	0	0	0	0	1	0	0	0	0	0	0	0	0	0	1	0	0
ERV316A3_4q26b	0	0	0	0	0	0	0	0	0	0	0	0	0	0	0	0	0	0	0	0	0	0	1	0	0	0	0	0	0	0	0	33	0	0	0	0	0	0	1	0	0	1	0	0	1	0	1	0	0
ERV316A3_4q26c	0	0	0	0	0	0	0	0	1	0	0	0	0	0	0	0	0	0	0	0	0	0	0	0	0	0	0	0	0	0	0	22	0	0	0	0	0	0	0	0	1	0	0	0	0	0	0	0	0
ERV316A3_4q26d	0	0	0	0	0	0	0	0	0	0	0	0	0	0	0	0	0	0	0	0	0	0	0	0	0	0	0	0	0	0	0	20	2	0	0	0	0	0	0	0	0	0	0	0	0	0	0	0	0
ERV316A3_4q26e	0	0	0	0	0	0	0	0	0	0	0	0	0	0	0	0	0	0	0	0	0	0	0	0	0	0	0	0	0	0	0	36	0	0	0	0	0	0	0	0	0	0	0	0	0	0	0	0	0
ERV316A3_4q26f	0	0	0	0	0	0	0	0	0	0	0	0	0	3	0	0	0	0	0	0	0	0	0	0	0	0	0	0	0	0	0	16	0	0	0	0	0	0	0	0	0	0	0	0	0	0	0	0	0
ERV316A3_4q26g	0	0	0	0	3	4	0	3	0	0	0	0	0	0	0	0	0	0	0	0	0	0	0	0	0	0	0	0	1	0	0	10	0	0	0	0	0	0	0	0	0	0	0	0	0	0	2	0	0
ERV316A3_4q26h	0	0	0	0	0	0	0	0	0	0	0	0	0	0	0	0	0	0	0	0	0	0	0	0	0	0	0	0	0	0	0	9	0	0	0	0	0	0	0	0	0	0	0	0	0	0	0	0	0
ERV316A3_4q26i	0	0	0	0	0	0	0	0	0	0	0	0	0	1	0	0	0	0	0	0	0	0	0	0	0	0	0	0	0	0	0	21	0	0	0	0	0	0	0	0	0	0	0	0	0	0	0	0	0
ERV316A3_4q26j	0	0	0	0	0	0	0	0	0	0	0	0	0	0	0	0	0	0	0	0	0	0	0	0	0	0	0	0	0	0	0	2	0	0	0	0	0	0	0	0	0	0	0	0	0	0	0	0	0
ERV316A3_4q26k	1	1	0	2	9	1	0	1	0	4	0	3	0	7	7	0	0	8	5	0	6	1	6	3	1	4	1	2	7	5	6	13	22	1	0	1	3	4	7	2	2	3	3	4	6	1	10	11	4
ERV316A3_4q27a	0	0	1	0	0	0	0	1	0	0	0	3	0	1	0	0	1	0	0	0	0	0	0	0	0	0	2	0	0	0	2	17	1	0	0	0	0	0	0	0	0	1	0	0	1	0	1	3	1
ERV316A3_4q27b	0	0	0	1	0	0	0	2	0	0	0	0	0	0	0	0	0	0	0	0	0	0	0	0	0	0	0	0	0	0	2	1	2	0	1	0	0	0	0	0	0	0	0	0	2	0	0	0	0
ERV316A3_4q27c	0	0	0	0	0	0	0	0	0	1	0	0	0	0	0	0	0	0	0	0	0	0	0	0	0	1	0	0	1	0	0	15	0	0	0	0	0	0	0	0	0	0	0	0	0	0	0	0	0
ERV316A3_4q28.1a	0	0	0	0	0	0	0	0	0	0	1	0	0	0	0	0	0	0	1	0	0	0	0	0	0	0	0	0	0	0	0	16	0	0	0	0	0	0	0	0	0	0	0	0	0	6	0	0	2
ERV316A3_4q28.1b	0	0	0	0	0	0	0	1	0	0	0	0	0	0	0	0	0	0	0	0	0	0	0	0	0	0	0	0	0	0	0	21	0	0	0	0	0	0	0	0	0	0	0	0	0	0	0	0	0
ERV316A3_4q28.1c	0	0	0	0	0	0	0	0	0	0	0	0	0	0	0	0	0	0	0	0	0	1	2	0	0	0	0	0	0	0	0	32	0	0	0	0	0	0	0	0	53	0	0	0	0	0	0	0	0
ERV316A3_4q28.1d	0	0	0	0	0	0	0	0	0	0	0	0	0	4	0	0	0	0	0	0	0	0	1	0	0	0	0	0	0	0	0	35	1	0	0	0	0	0	0	0	0	0	0	0	0	0	0	0	0
ERV316A3_4q28.1e	0	0	0	0	0	0	0	0	0	0	0	0	0	0	0	0	0	0	0	0	0	0	0	0	0	0	0	0	0	0	0	3	0	0	0	0	0	0	0	0	0	0	0	0	0	0	0	0	0
ERV316A3_4q28.3a	0	0	0	0	0	0	0	0	0	0	0	0	0	0	0	0	0	0	0	0	0	0	0	0	0	0	0	0	0	0	0	15	0	0	0	0	0	0	0	0	0	0	0	0	0	0	0	0	0
ERV316A3_4q28.3b	0	0	0	0	0	0	0	0	0	0	0	0	0	0	0	0	0	0	0	0	0	0	0	0	0	0	0	0	0	0	0	8	0	0	0	0	0	0	0	0	0	0	0	0	0	0	0	0	0
ERV316A3_4q28.3c	0	0	0	0	0	0	0	0	0	0	0	0	0	0	0	0	0	0	0	0	0	0	1	0	0	0	0	0	0	0	0	7	0	0	0	0	0	0	0	0	0	0	0	0	0	0	0	0	0
ERV316A3_4q28.3d	0	0	0	0	0	0	0	0	0	0	0	0	0	0	0	0	0	0	0	0	0	0	0	0	0	0	0	0	0	0	0	5	0	0	0	0	0	0	0	0	0	0	0	0	0	0	0	0	0
ERV316A3_4q28.3e	0	0	0	0	0	0	0	0	0	0	0	0	0	0	0	0	0	0	0	0	0	0	0	0	0	0	0	0	0	0	0	18	0	0	0	0	0	0	0	0	0	0	0	0	0	0	0	0	0
ERV316A3_4q28.3f	0	0	0	0	0	0	0	1	0	0	0	0	0	0	0	0	0	0	0	0	0	0	1	0	0	0	0	0	0	0	0	14	0	0	0	0	0	0	0	0	0	0	1	0	0	0	0	0	0
ERV316A3_4q28.3g	0	0	0	0	0	0	0	0	0	0	0	0	0	0	0	0	0	0	0	0	0	0	0	0	0	0	0	0	0	0	0	9	1	0	0	0	0	0	0	0	0	0	0	0	0	0	0	1	0
ERV316A3_4q28.3h	0	0	0	0	0	0	0	0	0	0	0	0	0	0	0	0	0	0	0	0	0	0	0	0	0	0	0	0	0	0	0	8	0	0	0	0	0	0	0	0	0	0	0	0	0	0	0	0	0
ERV316A3_4q28.3i	0	0	0	0	0	0	0	0	0	0	0	0	0	0	0	0	0	0	0	0	0	0	0	0	0	0	0	0	0	0	0	28	0	0	0	0	0	0	0	0	0	0	0	0	0	0	0	0	0
ERV316A3_4q28.3j	0	0	0	0	0	0	0	0	0	0	0	0	0	0	0	0	0	0	0	0	0	0	2	0	0	0	0	0	0	0	0	55	1	0	0	0	0	0	0	0	0	0	0	0	0	0	0	0	0
ERV316A3_4q28.3k	0	1	0	1	0	1	0	0	0	0	0	0	0	0	0	1	0	0	0	0	0	0	1	0	1	0	1	0	0	0	1	37	17	0	22	0	0	0	0	0	0	0	0	1	0	2	0	0	1
ERV316A3_4q28.3l	0	0	0	0	0	0	0	0	0	0	0	0	0	0	0	0	0	0	0	0	0	0	0	0	0	0	0	0	0	0	0	17	0	0	0	0	0	0	0	0	1	0	0	0	0	0	0	0	0
ERV316A3_4q28.3m	0	0	0	0	0	0	0	0	0	0	0	0	0	0	0	0	0	0	0	0	0	0	0	0	0	0	0	0	0	0	0	22	0	0	0	0	0	0	0	0	0	0	0	0	0	0	0	0	0
ERV316A3_4q28.3n	0	0	0	0	0	0	0	0	0	0	0	0	0	0	0	0	0	0	0	0	0	0	0	0	0	0	0	0	0	0	0	6	2	0	0	0	0	0	0	0	0	0	0	0	0	0	0	0	0
ERV316A3_4q28.3o	0	0	0	0	0	0	0	0	0	0	0	0	0	0	0	0	0	0	0	0	0	0	1	1	0	0	0	0	0	0	0	58	7	0	0	0	0	0	0	0	0	0	0	0	0	0	0	0	0
ERV316A3_4q28.3p	0	0	0	0	0	0	0	0	0	0	0	0	0	0	0	0	0	0	0	0	0	0	0	0	0	0	0	0	0	0	0	17	2	0	0	0	0	0	0	0	0	0	0	0	0	0	0	0	0
ERV316A3_4q28.3q	0	0	0	0	0	0	0	0	0	0	0	0	0	0	0	0	0	0	0	0	0	0	1	0	0	0	0	0	0	0	0	29	2	0	0	0	0	0	0	0	0	0	0	0	0	0	0	0	0
ERV316A3_4q28.3r	0	0	0	0	0	0	0	0	0	0	0	0	0	0	0	0	0	0	0	0	0	0	1	0	0	0	0	0	0	0	1	61	2	0	0	0	0	0	0	0	0	0	0	0	0	0	0	0	0
ERV316A3_4q28.3s	0	0	0	0	0	0	0	0	0	0	0	0	0	0	0	0	0	0	0	0	0	0	0	0	0	0	0	0	0	0	0	19	0	0	0	0	0	0	0	0	0	0	0	0	0	0	0	0	0
ERV316A3_4q28.3t	0	0	0	0	0	0	0	0	0	0	0	4	0	0	0	0	0	0	0	0	0	0	0	0	0	0	0	0	0	0	0	37	0	0	0	0	0	0	0	0	0	0	0	0	0	0	0	0	0
ERV316A3_4q31.1a	0	0	0	0	0	0	0	0	0	0	0	0	0	0	0	0	0	0	0	0	0	0	2	0	0	0	0	0	0	0	0	20	0	0	0	0	0	0	0	0	0	0	0	0	0	0	0	0	0
ERV316A3_4q31.1b	4	0	6	15	6	1	4	0	0	5	0	2	0	1	3	2	0	2	0	2	1	1	1	8	2	15	0	1	3	3	1	28	10	0	2	0	0	0	1	2	9	2	5	0	4	2	2	4	1
ERV316A3_4q31.21a	0	0	0	0	5	0	0	0	0	0	0	0	0	0	0	0	0	0	0	0	0	0	1	0	0	0	0	0	1	0	0	52	0	0	0	0	0	0	0	0	0	0	0	0	0	0	0	0	0
ERV316A3_4q31.21b	0	0	0	0	0	0	0	0	0	0	0	0	0	0	0	0	0	0	0	0	0	0	0	0	0	0	0	0	0	0	0	19	2	0	0	0	0	0	0	0	1	0	0	0	0	0	0	1	0
ERV316A3_4q31.21c	0	0	0	0	2	0	0	0	0	0	0	0	0	0	0	0	1	0	1	0	0	0	0	0	0	0	0	0	0	0	0	33	0	0	0	0	0	1	0	1	1	0	0	0	0	0	0	0	0
ERV316A3_4q31.21d	0	0	0	0	0	0	0	0	0	0	0	0	0	1	0	0	0	0	0	0	0	0	1	0	0	0	0	0	0	0	1	20	0	0	0	0	0	0	0	0	0	0	0	0	0	0	0	0	0
ERV316A3_4q31.21e	0	2	0	0	1	0	1	0	2	0	0	0	0	1	0	0	0	0	0	0	1	0	0	0	1	0	0	0	0	0	1	17	1	0	0	0	1	0	0	1	0	0	0	0	0	0	0	0	1
ERV316A3_4q31.21f	0	0	0	0	0	0	0	0	0	0	0	0	0	0	0	0	0	0	0	0	0	0	0	0	0	0	0	0	0	0	0	1	0	0	0	0	0	0	0	0	0	0	0	0	0	0	0	0	0
ERV316A3_4q31.22a	0	0	0	0	0	0	1	0	0	0	0	0	0	0	0	0	0	0	0	0	0	0	6	0	0	0	0	1	1	0	0	36	0	0	0	0	0	0	0	0	0	0	0	0	0	0	0	0	0
ERV316A3_4q31.22b	0	0	0	0	0	0	0	0	0	0	0	0	0	0	0	0	0	0	0	0	0	0	1	0	0	0	0	0	0	0	0	12	0	0	0	0	0	0	0	0	0	0	0	0	0	1	0	0	0
ERV316A3_4q31.23a	0	0	0	0	0	0	0	0	0	0	0	0	0	0	0	0	0	0	0	0	0	0	0	0	0	0	0	0	0	0	0	5	0	0	0	0	0	0	0	0	0	0	0	0	0	0	0	0	0
ERV316A3_4q31.23b	0	2	0	0	0	0	0	0	0	0	0	0	0	0	0	0	0	1	0	0	0	0	0	0	0	0	0	0	0	0	0	13	0	1	0	0	0	0	0	0	0	0	0	0	1	0	0	0	0
ERV316A3_4q31.23c	1	6	0	14	3	0	0	6	0	1	0	0	0	0	0	0	0	1	3	1	1	0	6	2	1	7	0	0	0	6	2	30	0	8	1	0	0	3	2	4	1	5	0	1	6	6	27	9	4
ERV316A3_4q31.23d	0	2	0	0	0	1	0	0	1	0	0	2	0	0	0	0	0	0	0	1	1	0	2	0	0	0	1	1	0	0	6	60	0	0	0	0	0	0	2	0	2	0	0	0	0	0	4	2	0
ERV316A3_4q31.3a	0	0	0	0	2	0	0	0	0	1	0	0	0	0	0	0	0	0	0	0	0	0	0	0	0	0	0	1	0	0	0	7	0	0	0	1	0	0	0	0	0	0	0	0	0	0	0	0	0
ERV316A3_4q31.3b	0	0	0	0	0	0	0	0	0	0	0	0	0	0	0	0	0	0	0	0	0	0	0	0	0	0	0	0	0	0	2	12	1	0	0	0	0	0	0	0	0	0	0	0	0	0	0	3	0
ERV316A3_4q32.1a	0	0	0	0	0	0	0	0	0	0	0	0	0	0	0	0	0	0	0	0	0	0	0	0	0	0	0	0	0	0	0	16	0	0	0	0	0	0	0	0	0	0	0	0	0	0	0	0	0
ERV316A3_4q32.1b	0	0	0	1	0	0	0	0	0	0	0	0	0	0	0	0	0	0	0	0	0	0	2	0	0	0	0	0	0	0	0	28	0	0	0	0	0	0	0	0	0	0	0	0	0	0	0	0	0
ERV316A3_4q32.1c	0	0	0	0	0	0	0	0	0	0	0	0	0	0	0	0	0	0	0	0	0	0	4	0	0	0	0	0	0	0	0	45	0	0	0	0	0	0	0	0	0	0	0	0	0	0	0	0	0
ERV316A3_4q32.1d	0	0	0	0	0	0	0	0	0	0	0	0	0	0	0	0	0	0	0	0	0	0	0	0	0	0	0	0	0	0	0	15	0	0	0	0	0	0	0	0	0	0	0	0	0	0	0	0	0
ERV316A3_4q32.1e	0	0	0	0	0	0	0	0	0	0	0	0	0	0	0	0	0	0	0	1	0	0	0	0	0	0	0	0	0	0	0	21	0	0	0	0	0	0	0	0	0	0	0	0	1	0	0	0	0
ERV316A3_4q32.1f	0	0	0	43	0	0	0	0	0	0	0	0	0	0	0	0	0	0	0	0	0	0	1	0	0	0	0	0	0	0	0	19	0	0	0	0	0	0	0	0	0	0	0	0	0	0	0	0	0
ERV316A3_4q32.1g	0	0	0	0	0	0	0	0	0	0	0	0	0	0	0	0	0	0	0	0	0	0	0	0	0	0	0	0	0	1	0	10	0	0	0	0	0	0	0	0	0	0	0	0	0	0	0	0	0
ERV316A3_4q32.1h	1	0	0	1	2	0	0	1	0	1	0	0	0	0	0	0	0	0	0	0	0	0	0	0	0	0	4	1	8	0	0	21	8	0	2	0	0	0	1	0	0	1	0	0	1	0	0	11	0
ERV316A3_4q32.1i	0	0	0	2	3	0	0	0	0	0	0	0	0	0	0	0	0	0	0	1	0	0	2	0	0	0	1	0	3	1	0	12	0	0	1	0	0	0	0	0	0	0	0	0	0	0	0	0	0
ERV316A3_4q32.1j	0	0	0	1	0	1	0	0	0	0	0	0	0	0	0	0	0	0	0	0	0	0	0	0	0	0	0	0	0	0	0	24	0	0	0	0	0	0	0	0	0	0	0	0	0	0	0	1	0
ERV316A3_4q32.1k	0	0	0	0	0	0	0	1	0	0	0	0	0	0	0	0	0	0	0	0	0	0	1	0	0	0	0	0	0	2	0	30	0	0	0	0	0	0	0	0	0	0	0	0	0	2	0	0	0
ERV316A3_4q32.1l	0	0	0	0	0	0	0	0	0	0	0	0	0	0	0	0	0	0	0	0	0	0	2	0	0	0	0	0	0	0	0	39	0	0	0	0	0	0	0	0	0	0	0	0	0	0	0	0	0
ERV316A3_4q32.2a	0	0	0	0	0	0	0	0	0	0	0	0	0	0	0	0	0	0	0	0	0	0	0	0	0	0	0	0	0	0	0	15	0	0	0	0	0	0	0	0	0	0	0	0	0	0	0	0	0
ERV316A3_4q32.2b	0	0	0	0	0	0	0	0	0	0	0	0	0	0	0	0	0	0	0	0	0	0	0	0	0	0	0	0	0	0	0	8	0	0	0	0	0	0	0	0	0	0	0	0	0	0	0	0	0
ERV316A3_4q32.2c	0	0	0	0	0	0	0	0	0	0	0	0	0	0	0	0	0	0	0	0	0	0	1	0	0	0	0	0	1	0	0	25	0	0	0	0	0	0	0	0	0	0	0	0	0	0	0	0	0
ERV316A3_4q32.2d	3	2	0	7	2	0	0	3	1	2	0	0	0	1	2	0	0	0	0	0	0	2	2	0	1	0	0	0	0	3	0	16	6	0	0	0	1	1	0	2	1	0	0	1	2	0	0	3	3
ERV316A3_4q32.3a	0	0	2	0	0	0	0	0	0	0	0	0	0	2	0	0	0	0	0	0	0	2	0	0	0	1	0	0	0	0	1	8	0	0	0	0	0	0	0	0	0	0	1	0	0	0	0	0	0
ERV316A3_4q32.3b	0	0	0	0	0	5	0	1	0	0	0	0	0	2	0	0	0	0	0	0	0	0	0	0	0	0	15	0	1	0	0	12	0	0	0	0	0	0	0	0	2	0	0	1	1	0	0	0	0
ERV316A3_4q32.3c	0	0	0	1	0	0	0	1	0	1	0	0	0	0	0	0	0	0	0	0	0	0	1	2	0	0	1	0	0	0	0	28	1	0	0	0	1	0	1	0	0	0	0	0	0	0	0	0	1
ERV316A3_4q32.3d	0	0	0	0	0	0	0	0	0	0	0	0	0	0	0	0	0	0	0	1	0	0	0	0	0	0	0	0	0	0	0	28	0	0	0	0	0	0	0	0	0	0	0	0	0	0	0	0	0
ERV316A3_4q32.3e	0	0	0	0	0	0	0	0	0	0	0	0	0	0	0	0	0	0	0	0	0	0	0	0	0	0	0	0	0	0	0	8	0	0	0	0	0	0	0	0	0	0	0	0	0	0	0	0	0
ERV316A3_4q32.3f	0	0	0	0	0	0	0	0	0	0	0	0	0	0	0	0	0	0	0	0	0	0	2	0	0	0	0	0	0	0	0	39	0	0	0	0	0	0	0	0	0	0	0	0	0	0	0	0	0
ERV316A3_4q34.1a	0	0	0	0	0	0	0	0	0	0	0	0	0	0	0	0	0	0	0	0	0	0	0	0	0	0	0	0	0	0	0	55	0	0	0	0	0	0	0	0	0	0	0	0	0	0	0	0	0
ERV316A3_4q34.1b	0	0	0	0	0	0	0	0	0	0	0	0	0	0	0	0	0	0	0	0	0	0	1	0	0	0	0	0	0	0	0	48	0	0	0	0	0	0	0	0	0	0	0	0	0	0	0	0	0
ERV316A3_4q34.1c	0	0	0	0	0	0	1	0	0	0	0	0	0	0	0	0	0	0	0	0	0	0	1	0	0	0	0	0	1	0	0	32	0	0	0	0	0	0	0	0	0	0	0	0	0	0	0	0	0
ERV316A3_4q34.2	0	0	0	0	0	0	0	0	0	0	0	0	0	0	0	0	0	0	0	0	0	0	0	0	0	0	0	0	0	0	0	11	0	0	0	0	0	0	0	0	0	0	0	0	0	0	0	0	0
ERV316A3_4q34.3a	0	0	0	0	0	0	0	0	0	0	0	0	0	0	0	0	0	0	0	0	0	0	0	0	0	0	0	0	0	0	0	18	0	0	0	0	0	0	0	0	0	0	0	0	0	0	0	0	0
ERV316A3_4q34.3b	0	0	0	0	0	0	0	0	0	0	0	0	0	0	0	0	0	0	0	0	0	0	0	0	0	0	0	0	0	0	0	47	0	0	0	0	0	0	0	0	0	0	0	0	0	0	0	0	0
ERV316A3_4q34.3c	0	0	0	0	0	0	0	0	0	0	0	0	0	0	0	0	0	0	0	0	0	0	0	0	0	0	0	0	0	0	0	17	0	0	0	0	0	0	0	0	0	0	0	0	0	0	0	0	0
ERV316A3_4q35.1	0	0	0	0	0	0	0	0	0	0	0	0	0	0	0	0	0	0	0	0	0	0	0	1	0	0	0	0	0	1	0	20	0	0	0	0	0	0	0	0	0	0	0	0	0	0	0	0	0
ERV316A3_4q35.2a	0	1	0	0	0	0	0	0	0	0	0	2	0	0	0	0	0	0	0	2	0	0	1	0	0	0	0	1	0	0	1	35	2	0	1	0	0	0	0	0	0	0	0	0	0	0	0	0	0
ERV316A3_4q35.2b	0	0	0	67	0	1	1	0	0	0	0	0	2	3	1	1	2	2	0	0	8	0	1	0	0	1	107	2	13	2	35	31	16	3	11	0	164	2	0	55	3	0	41	0	21	0	2	1	0
ERV316A3_4q35.2c	2	0	0	0	0	2	0	2	0	0	0	0	0	0	0	0	0	0	0	0	0	0	0	0	0	0	0	0	0	0	0	14	0	0	0	0	0	0	0	0	0	0	0	0	0	0	0	0	0
ERV316A3_4q35.2d	0	0	0	0	0	0	0	0	0	0	0	1	0	0	0	0	0	0	0	0	0	0	2	0	0	0	0	0	0	0	0	14	0	0	0	1	0	0	1	0	0	0	0	0	0	0	0	1	4
ERV316A3_4q35.2e	0	0	0	0	0	0	0	0	0	0	0	0	0	0	1	0	0	0	0	0	0	0	0	0	0	0	0	0	0	0	0	6	0	0	0	0	0	0	0	0	0	0	0	0	0	0	0	0	0
ERV316A3_4q35.2f	0	0	0	0	3	0	0	0	0	0	0	0	0	0	0	0	0	0	0	0	0	0	1	0	0	0	0	0	0	1	0	19	0	0	0	0	0	0	0	0	0	0	0	0	0	0	0	0	0
ERV316A3_5p12a	0	0	0	0	0	1	0	1	0	0	0	1	0	0	0	0	0	0	0	1	0	0	2	0	0	0	0	0	0	0	0	17	0	0	0	0	0	0	0	0	0	0	0	0	0	1	0	3	3
ERV316A3_5p12b	0	0	0	1	0	0	0	0	0	0	0	0	0	0	0	0	0	0	0	0	0	0	3	0	0	0	0	0	0	0	0	52	0	0	0	0	0	0	0	0	0	0	0	0	0	1	0	0	0
ERV316A3_5p12c	0	0	0	0	0	0	0	0	0	0	0	0	0	2	0	0	0	0	0	0	0	0	0	0	0	0	0	0	0	0	0	35	0	0	0	0	0	0	0	0	0	0	0	0	0	0	0	0	0
ERV316A3_5p12d	0	0	0	0	0	0	0	0	0	0	0	0	0	0	0	0	0	0	0	0	0	0	0	0	0	0	0	0	0	0	0	17	0	0	0	0	0	0	0	0	0	0	0	0	0	0	0	0	0
ERV316A3_5p12e	0	0	0	0	0	0	0	0	0	0	0	0	0	0	0	0	0	0	0	0	0	0	3	0	0	0	0	0	0	0	0	81	0	0	0	0	0	0	0	0	0	0	0	0	0	0	0	0	0
ERV316A3_5p12f	0	0	0	0	0	0	0	0	0	0	0	0	0	0	0	0	0	0	0	0	0	0	0	0	0	0	0	0	0	0	0	9	0	0	0	0	0	0	0	0	0	0	0	0	0	0	0	0	0
ERV316A3_5p13.1a	0	0	0	0	22	0	0	1	0	0	0	0	0	0	1	0	0	1	0	0	0	1	0	1	2	0	0	0	1	2	2	18	4	0	0	0	0	0	0	0	1	0	1	0	1	1	24	1	2
ERV316A3_5p13.1b	0	0	0	0	0	0	0	0	0	0	0	0	0	0	0	0	0	0	0	0	0	0	0	0	0	0	0	0	0	0	0	15	0	0	0	0	0	0	0	0	0	0	0	0	0	0	0	0	0
ERV316A3_5p13.1c	0	0	0	0	0	0	0	0	0	0	0	0	0	0	0	0	0	0	0	0	0	0	0	0	0	0	0	0	0	0	0	23	0	0	0	0	0	0	0	0	0	0	0	0	0	0	0	0	0
ERV316A3_5p13.1d	0	0	0	0	0	0	0	0	0	3	0	0	0	0	0	0	0	0	0	0	0	0	0	0	0	0	0	0	0	0	0	20	0	0	0	0	0	0	0	0	0	0	0	0	0	0	1	0	0
ERV316A3_5p13.1e	0	0	0	0	0	0	0	0	0	0	0	0	0	2	0	0	0	0	0	0	0	0	0	0	0	0	0	0	0	0	0	17	1	0	0	0	0	0	0	0	0	0	0	0	0	0	0	1	0
ERV316A3_5p13.1f	0	0	0	0	0	0	0	0	0	0	0	0	0	0	0	0	0	0	0	0	0	0	0	0	0	0	0	0	0	0	0	17	0	0	0	0	9	0	0	0	0	0	0	0	0	0	0	0	0
ERV316A3_5p13.1g	0	0	1	1	0	1	1	1	0	0	0	0	0	1	0	1	0	0	0	0	0	0	2	0	0	0	0	2	16	0	0	40	0	0	0	1	0	0	0	0	0	0	3	0	0	0	0	0	0
ERV316A3_5p13.2	0	0	0	0	0	0	0	0	0	0	0	0	0	0	0	0	0	0	0	0	0	0	3	0	0	0	0	0	0	0	0	6	0	0	0	0	0	0	0	0	0	0	1	0	0	0	0	0	0
ERV316A3_5p13.3a	0	0	0	0	0	0	0	0	0	0	0	0	0	0	0	0	0	0	0	0	0	0	2	0	0	0	0	0	0	0	0	16	1	0	0	0	0	0	0	0	0	0	0	0	0	0	1	0	0
ERV316A3_5p13.3b	0	0	0	0	0	0	0	0	0	0	0	0	0	0	0	0	0	0	0	0	0	0	1	0	0	0	0	0	0	0	0	39	0	0	0	0	0	0	0	0	0	0	0	0	0	0	0	0	0
ERV316A3_5p13.3c	0	0	0	0	0	0	0	0	0	0	0	0	0	0	0	0	0	0	0	0	0	0	0	0	0	0	0	0	0	0	0	3	0	0	0	0	0	0	0	0	0	0	0	0	0	0	0	0	0
ERV316A3_5p13.3d	0	0	0	0	0	0	0	1	0	0	0	0	0	0	0	0	0	0	0	0	0	1	1	0	0	0	0	0	0	0	1	42	0	0	0	0	0	0	0	0	0	0	0	0	0	0	0	0	0
ERV316A3_5p13.3e	1	3	4	1	3	9	1	13	2	13	0	0	2	26	1	0	26	23	2	5	10	1	4	3	4	4	7	5	17	9	10	35	35	2	10	2	8	6	7	1	3	1	4	4	10	1	14	22	1
ERV316A3_5p14.1a	0	0	0	0	0	0	0	0	0	0	0	0	0	0	0	0	0	0	0	0	0	0	0	0	0	0	0	0	0	0	0	6	0	0	0	0	0	0	0	0	0	0	0	0	0	0	0	0	0
ERV316A3_5p14.1b	7	0	0	13	14	2	0	34	0	0	5	0	0	21	0	2	0	0	0	3	18	5	4	0	4	0	19	57	1	7	42	30	23	9	0	0	20	34	3	0	75	0	19	2	0	0	47	8	0
ERV316A3_5p14.1c	0	0	0	1	18	0	0	2	0	0	0	0	0	1	0	3	0	1	0	0	0	8	7	2	0	0	0	6	0	3	0	5	27	0	0	0	4	0	0	0	0	0	2	0	0	0	0	1	0
ERV316A3_5p14.1d	0	0	0	0	0	0	0	0	0	0	0	1	0	0	0	0	0	0	0	0	0	0	1	0	0	0	3	0	0	0	0	22	0	0	0	0	0	0	0	0	0	0	0	0	0	0	0	0	0
ERV316A3_5p14.1e	0	0	0	0	0	0	0	0	0	0	0	0	0	1	0	0	0	0	0	0	1	0	0	2	0	0	0	0	0	0	0	4	2	0	0	0	2	0	1	0	0	0	0	0	2	0	0	16	0
ERV316A3_5p14.2a	0	0	0	0	2	0	0	0	0	0	0	0	0	0	0	0	0	0	0	0	0	0	0	0	0	0	0	0	0	0	0	11	0	0	0	0	0	0	0	0	0	19	0	0	0	0	0	0	0
ERV316A3_5p14.2b	0	0	0	0	0	0	0	0	0	0	0	0	0	0	0	0	0	0	0	0	0	0	2	0	0	0	0	0	0	0	0	37	0	0	0	0	0	0	0	0	0	0	0	0	0	0	0	0	0
ERV316A3_5p14.2c	0	0	0	0	0	0	0	0	0	0	0	0	0	0	0	0	0	0	0	0	0	0	0	0	0	0	0	0	0	0	0	6	0	0	0	0	0	0	0	0	0	0	0	0	0	0	0	0	0
ERV316A3_5p14.3a	0	0	0	0	0	0	0	0	0	0	0	0	0	0	0	0	0	0	0	0	0	0	0	0	0	0	0	0	0	0	0	7	0	0	0	0	0	0	0	0	0	0	0	0	0	0	0	0	0
ERV316A3_5p14.3b	0	0	0	0	0	0	0	0	0	0	0	0	0	0	0	0	0	0	0	0	0	0	0	0	0	0	0	0	0	0	0	4	0	0	0	0	0	0	0	0	0	0	0	0	0	0	0	0	0
ERV316A3_5p14.3c	0	0	0	0	0	0	0	0	0	0	0	0	0	0	0	0	0	0	0	0	0	0	0	0	0	0	0	0	0	0	0	24	0	0	0	0	0	0	0	0	0	0	0	0	0	0	0	0	0
ERV316A3_5p14.3d	0	0	0	0	1	0	0	0	0	4	0	0	0	0	0	0	0	0	2	0	0	0	2	0	0	0	0	0	0	0	0	69	4	0	9	0	0	0	0	0	0	0	1	0	0	0	0	7	0
ERV316A3_5p14.3e	0	0	0	0	0	51	0	22	0	0	0	0	0	0	0	0	0	0	0	0	0	0	0	0	0	0	0	0	0	0	0	33	9	0	7	0	0	0	0	0	0	0	0	1	0	0	1	9	0
ERV316A3_5p14.3f	0	0	0	0	0	0	0	0	0	0	0	0	0	1	0	0	0	0	0	1	0	0	0	0	0	0	0	1	0	0	0	21	12	0	0	0	0	0	0	0	0	0	0	0	0	0	8	4	0
ERV316A3_5p14.3g	0	0	0	0	0	0	0	0	0	0	0	0	0	0	0	0	0	0	0	0	0	0	1	0	0	0	0	0	0	0	0	24	0	1	0	0	0	0	0	0	0	0	0	0	0	0	0	0	0
ERV316A3_5p14.3h	0	0	0	0	0	0	0	0	0	0	0	0	0	0	0	0	0	0	0	0	0	0	0	0	0	0	0	0	0	0	0	11	0	0	0	0	0	0	0	0	0	0	0	0	0	0	0	0	0
ERV316A3_5p14.3i	0	0	0	0	0	0	0	0	0	0	0	0	0	0	0	0	0	0	0	0	0	0	2	0	0	0	0	0	0	0	0	20	0	0	0	0	0	0	1	0	0	0	0	0	0	0	0	0	0
ERV316A3_5p14.3j	0	0	0	0	0	0	1	0	0	0	0	0	0	0	0	0	0	0	0	0	0	0	0	0	0	0	0	0	0	0	0	36	0	0	0	0	0	0	0	0	0	0	0	0	0	0	0	0	0
ERV316A3_5p14.3k	0	0	0	0	0	0	0	0	0	0	0	0	0	0	0	0	0	0	0	0	0	0	3	0	0	0	0	0	0	0	0	58	0	0	0	0	0	0	0	0	0	0	0	0	0	0	0	0	0
ERV316A3_5p15.1a	0	0	0	0	0	0	0	0	0	0	0	0	0	0	0	0	0	0	0	0	0	0	0	0	0	0	0	0	0	0	0	20	0	0	0	0	0	0	0	0	0	0	0	0	0	0	0	0	0
ERV316A3_5p15.1b	0	0	0	0	0	0	0	0	0	0	0	0	0	0	0	0	0	0	0	0	0	0	0	0	0	0	0	0	0	0	0	5	0	0	0	0	0	0	0	0	0	0	0	0	0	0	0	0	0
ERV316A3_5p15.1c	0	0	0	0	0	0	0	0	0	0	0	0	0	0	0	0	0	0	0	0	0	0	1	0	0	0	0	0	0	0	0	7	0	0	0	0	0	0	0	0	0	0	0	0	0	0	0	1	0
ERV316A3_5p15.1d	0	0	0	0	0	0	0	0	0	0	0	0	0	0	0	0	0	0	0	0	0	0	1	0	0	0	0	0	0	0	0	36	0	0	0	0	2	0	0	0	0	0	0	0	0	0	0	0	0
ERV316A3_5p15.1e	0	0	0	0	0	0	0	0	0	0	0	0	0	0	0	0	0	0	0	0	0	0	0	0	0	0	0	0	0	0	0	10	0	0	0	0	0	0	0	0	0	0	0	0	0	0	0	0	0
ERV316A3_5p15.2a	0	0	0	0	0	1	0	0	0	0	0	3	0	19	0	0	0	0	0	11	0	1	0	2	2	0	2	0	39	0	12	7	26	0	2	1	0	0	0	0	1	0	0	1	0	0	2	6	0
ERV316A3_5p15.2b	0	0	0	0	0	0	0	0	0	0	0	0	0	1	0	0	0	0	0	0	0	0	0	0	0	0	0	0	0	0	0	6	3	0	0	0	0	0	0	0	0	0	0	0	0	0	1	0	0
ERV316A3_5p15.2c	0	0	0	0	0	0	0	0	0	0	0	0	0	0	0	0	0	0	0	0	0	0	1	0	0	0	0	0	1	0	0	18	1	0	0	0	0	0	0	0	0	0	0	0	0	0	0	0	0
ERV316A3_5p15.2d	0	0	0	0	0	0	0	0	0	0	0	0	0	1	0	0	0	0	0	1	2	0	1	0	0	0	0	0	0	0	7	16	0	0	0	0	0	4	0	0	0	0	0	2	0	0	2	1	0
ERV316A3_5p15.2e	38	1	0	1	5	1	0	2	0	0	9	4	0	25	0	5	0	0	0	50	15	8	0	0	31	0	18	39	59	100	286	13	2	0	4	46	54	57	3	0	31	0	15	32	0	0	39	13	0
ERV316A3_5p15.2f	0	0	0	0	0	0	0	0	0	0	0	0	0	0	0	0	0	0	0	0	0	0	0	0	0	0	0	0	0	0	0	10	0	0	0	0	0	0	0	0	0	0	0	0	0	0	0	0	0
ERV316A3_5p15.31	1	2	0	1	6	0	1	1	0	4	3	1	0	32	2	0	8	9	1	7	0	5	0	4	4	2	1	12	4	2	11	25	45	0	3	1	9	1	1	3	2	0	1	1	9	1	15	18	1
ERV316A3_5p15.32a	2	24	2	5	0	1	4	5	0	11	3	2	3	40	2	0	29	0	20	2	10	0	6	1	9	0	10	4	15	6	14	56	33	1	5	0	13	5	21	3	2	0	9	8	17	1	0	79	0
ERV316A3_5p15.32b	0	0	0	0	0	0	0	0	0	0	0	0	0	0	0	0	0	0	0	0	0	0	0	0	0	0	0	0	0	0	0	18	1	0	0	0	0	0	0	0	0	0	0	0	0	0	0	0	0
ERV316A3_5p15.32c	0	0	0	0	0	0	0	0	0	0	0	0	0	0	0	0	0	0	0	0	0	0	0	0	0	0	0	0	0	0	0	14	0	0	0	0	0	0	0	0	0	0	0	0	0	0	0	0	0
ERV316A3_5p15.32d	0	0	0	0	0	0	0	0	0	0	0	0	0	0	0	0	0	0	0	0	0	1	2	0	0	0	0	0	0	6	2	32	0	0	0	0	0	0	0	0	0	1	0	0	0	0	0	1	0
ERV316A3_5p15.33	0	0	0	0	0	0	0	0	0	0	0	0	0	0	0	0	0	0	0	0	0	0	0	0	0	0	0	0	0	0	0	19	0	0	0	0	0	0	0	0	0	0	0	0	0	0	0	0	0
ERV316A3_5q11.1	0	0	0	0	0	0	0	0	0	0	0	0	0	0	0	0	0	0	0	0	0	0	1	0	0	0	0	0	0	0	0	22	0	0	0	0	0	0	0	0	0	0	0	0	0	0	0	0	0
ERV316A3_5q11.2a	0	0	0	0	0	0	0	0	0	0	0	0	0	0	0	0	0	0	0	0	0	0	1	0	0	0	0	2	0	0	0	12	0	0	0	0	0	0	0	0	0	0	0	0	0	0	0	0	0
ERV316A3_5q11.2b	0	0	0	0	0	0	0	0	0	0	0	0	0	0	0	0	0	0	0	0	0	0	1	0	0	0	0	0	0	0	0	18	0	0	0	0	0	0	0	0	0	0	0	0	0	0	0	0	0
ERV316A3_5q11.2c	0	0	0	0	0	0	0	0	0	0	0	0	0	0	0	0	1	0	0	0	0	0	1	0	0	0	0	0	0	1	0	38	1	0	0	0	0	0	0	0	0	0	0	0	2	0	0	0	1
ERV316A3_5q11.2d	0	0	0	0	1	0	0	0	0	0	0	0	0	0	0	0	0	0	0	0	0	0	0	0	0	0	0	0	0	0	0	68	0	0	0	0	0	0	0	0	0	0	0	0	0	0	0	0	0
ERV316A3_5q11.2e	0	0	0	0	0	0	0	0	0	0	0	0	0	0	0	0	0	0	0	0	0	2	0	0	0	0	0	3	0	0	0	11	0	0	0	0	0	0	0	0	0	0	0	0	0	0	0	0	0
ERV316A3_5q11.2f	2	3	0	1	0	0	2	0	0	1	0	0	0	1	0	0	0	0	0	0	0	0	0	1	0	0	2	0	2	1	0	12	0	1	1	0	2	0	1	1	0	0	1	0	1	0	1	0	1
ERV316A3_5q11.2g	0	0	0	0	1	0	0	0	0	1	0	0	0	0	0	0	0	0	0	0	0	0	1	0	0	0	0	0	0	0	0	27	0	0	0	0	0	0	0	0	0	0	0	0	0	0	0	0	0
ERV316A3_5q11.2h	0	0	0	0	0	1	0	0	0	0	0	0	0	1	0	0	0	0	0	0	0	0	0	0	0	0	0	0	0	0	0	8	0	0	0	0	0	0	0	1	0	0	1	0	0	0	0	0	0
ERV316A3_5q11.2i	0	0	0	0	0	0	0	0	0	0	0	0	0	0	0	0	0	0	0	0	0	0	0	0	0	0	0	0	0	0	0	15	0	0	0	0	0	0	0	0	0	0	0	0	0	0	0	0	0
ERV316A3_5q11.2j	0	0	0	0	0	0	0	0	0	0	0	0	0	0	0	0	0	0	0	0	0	0	0	0	0	0	0	0	0	0	0	5	0	0	0	0	0	0	0	0	0	0	0	0	0	0	0	0	0
ERV316A3_5q11.2k	0	0	0	2	0	0	1	0	0	0	0	0	0	0	0	0	0	0	0	0	0	0	3	0	0	0	0	0	0	0	0	27	0	0	0	0	0	0	0	0	0	0	0	0	0	0	0	0	0
ERV316A3_5q11.2l	0	0	0	0	0	0	0	0	1	0	0	0	0	0	0	0	0	0	0	0	0	0	2	0	0	0	0	0	0	1	0	25	0	0	0	0	0	0	0	1	0	0	1	0	0	0	0	0	0
ERV316A3_5q12.1a	0	1	0	1	0	0	0	0	0	0	0	0	0	2	0	0	0	3	0	2	0	0	0	0	1	0	0	0	0	0	0	4	5	0	0	0	0	1	0	0	0	1	0	0	3	0	3	0	0
ERV316A3_5q12.1b	0	4	4	0	0	0	0	0	0	3	0	0	0	2	1	0	1	2	1	2	1	2	0	0	1	1	0	0	1	0	2	17	7	0	0	0	0	1	0	1	0	0	2	0	1	0	1	1	0
ERV316A3_5q12.1c	0	0	0	0	0	0	0	0	0	0	0	0	0	0	0	0	0	0	0	0	0	0	0	0	0	0	0	0	0	0	1	11	0	0	0	0	0	0	0	0	0	1	0	0	0	0	0	0	0
ERV316A3_5q12.1d	0	0	0	0	0	0	0	0	0	0	0	0	0	0	0	0	0	0	0	0	0	0	0	0	0	0	0	0	0	0	0	9	0	0	2	0	0	0	0	0	0	0	0	0	0	0	0	0	0
ERV316A3_5q12.1e	0	0	0	0	0	0	0	0	0	0	0	0	0	0	0	0	0	0	0	0	0	0	1	0	0	0	0	0	0	0	0	13	0	0	0	0	0	0	0	0	0	0	0	0	0	0	0	0	0
ERV316A3_5q12.1f	0	0	0	0	0	0	0	0	0	0	0	0	0	0	0	0	0	0	0	0	0	0	1	0	0	0	0	0	0	0	0	10	0	0	0	0	0	0	0	0	0	0	0	0	0	2	0	0	0
ERV316A3_5q12.3a	0	0	0	0	0	0	0	0	0	0	0	0	0	0	0	0	0	0	0	0	0	0	1	0	0	0	0	0	0	0	0	26	0	0	0	0	0	0	0	0	0	0	0	0	0	0	0	0	0
ERV316A3_5q12.3b	0	0	0	0	0	0	0	0	0	0	0	0	0	0	0	0	0	0	0	0	0	0	0	0	0	0	0	0	0	0	0	7	0	0	0	0	0	0	0	0	0	0	0	0	0	0	0	0	0
ERV316A3_5q12.3c	0	0	0	0	0	0	0	0	0	0	0	0	0	0	0	0	0	0	0	0	0	0	0	0	0	0	0	0	0	0	0	28	0	0	0	0	0	0	0	0	0	0	0	0	0	0	0	0	0
ERV316A3_5q12.3d	0	0	0	0	0	0	0	0	0	0	0	0	0	0	0	0	0	0	0	0	0	0	0	0	1	0	0	0	0	0	0	25	0	0	0	0	0	0	0	0	0	0	0	0	0	0	0	1	0
ERV316A3_5q12.3e	0	1	0	0	0	0	0	0	0	0	0	0	0	0	0	0	0	0	0	0	0	0	0	0	0	0	0	0	0	0	0	21	1	0	0	0	0	0	0	0	0	0	1	0	0	0	0	0	0
ERV316A3_5q13.1	0	2	0	1	0	3	2	0	0	0	0	0	0	0	0	0	2	0	0	0	0	0	1	0	0	0	0	0	0	0	2	17	1	0	0	0	0	1	0	0	1	0	0	0	0	0	0	3	0
ERV316A3_5q13.2a	0	0	0	0	1	0	0	0	0	0	0	0	0	0	0	0	0	0	0	0	0	0	0	0	0	0	0	0	0	2	0	11	0	1	0	0	0	1	0	0	0	0	0	0	0	0	0	0	0
ERV316A3_5q13.2b	1	0	0	0	0	0	0	0	0	0	0	0	0	0	0	0	0	0	0	0	0	0	1	0	0	0	0	0	0	0	0	23	0	0	0	0	0	0	0	0	0	0	1	0	0	0	0	0	0
ERV316A3_5q13.2c	0	0	0	0	0	0	0	0	0	0	0	0	0	0	0	0	0	0	0	0	0	0	2	0	0	0	0	0	0	1	0	39	0	0	0	0	0	0	0	0	0	0	0	0	0	0	0	0	0
ERV316A3_5q13.2d	0	0	0	0	0	0	0	0	0	0	0	0	0	0	0	0	0	0	0	0	0	0	0	0	0	0	0	0	0	0	0	41	0	0	0	0	0	0	0	0	0	0	0	0	0	0	0	0	0
ERV316A3_5q13.2e	0	0	0	0	0	0	0	0	0	0	0	0	0	0	0	0	0	0	0	0	0	0	0	0	0	0	0	0	0	0	0	18	0	0	0	0	0	0	0	1	1	0	0	0	0	0	0	0	0
ERV316A3_5q13.2f	0	0	0	0	0	0	0	0	0	0	0	0	0	0	0	0	0	0	0	0	0	0	0	0	0	0	0	0	0	0	0	6	0	0	0	0	0	0	0	0	0	0	0	0	0	0	0	0	0
ERV316A3_5q13.3a	0	0	0	0	0	0	0	0	0	0	0	0	0	0	0	0	0	0	0	0	0	0	0	0	0	0	0	0	0	0	0	12	0	0	0	0	0	0	0	0	0	0	0	0	0	0	0	0	0
ERV316A3_5q13.3b	0	0	0	0	4	0	0	0	0	2	0	0	0	4	0	0	0	0	1	2	2	2	2	1	0	0	0	0	1	2	1	2	0	0	0	0	3	3	0	0	1	0	1	0	2	0	0	2	0
ERV316A3_5q13.3c	0	0	0	0	0	0	0	1	0	0	0	1	5	3	0	0	1	0	0	1	0	1	1	0	0	1	0	1	1	2	0	14	4	0	1	0	0	1	1	0	0	0	1	0	2	1	2	0	4
ERV316A3_5q14.1	8	3	15	12	16	10	21	15	8	4	0	7	13	7	10	1	4	14	9	18	7	23	15	11	13	10	12	11	16	11	21	24	16	7	5	7	3	16	6	13	7	3	3	7	14	8	16	14	8
ERV316A3_5q14.2	0	1	0	1	2	2	1	0	0	1	0	0	0	2	0	0	0	0	0	0	2	0	3	0	0	0	0	0	1	1	0	32	0	1	0	0	0	0	0	0	0	0	0	0	0	0	0	1	0
ERV316A3_5q14.3a	11	17	23	75	1	11	3	5	2	0	4	0	1	11	21	1	53	8	2	35	6	23	15	18	2	5	2	3	1	1	3	13	22	1	3	1	0	2	5	12	12	5	3	1	3	1	1	6	5
ERV316A3_5q14.3b	0	0	0	0	0	0	0	0	0	0	0	0	0	0	0	0	0	0	0	0	0	0	0	0	0	0	0	0	0	0	0	10	0	0	0	0	0	0	0	0	0	0	0	0	0	0	0	0	0
ERV316A3_5q14.3c	0	30	0	0	3	13	3	15	0	0	0	0	0	28	4	0	0	0	1	7	0	20	1	0	0	0	7	3	0	0	8	19	16	0	3	4	0	3	41	0	0	1	0	1	11	0	5	20	0
ERV316A3_5q14.3d	2	0	0	0	0	0	0	1	0	0	0	0	0	1	0	0	0	0	0	0	0	0	1	0	0	0	0	0	0	0	0	30	0	0	1	0	0	0	0	0	0	0	0	0	0	0	0	0	0
ERV316A3_5q14.3e	0	0	1	1	0	0	3	0	2	0	0	1	0	0	0	1	0	0	0	0	1	2	1	4	0	1	1	0	1	2	1	28	2	2	0	0	0	0	0	2	0	1	0	1	6	2	0	0	132
ERV316A3_5q14.3f	0	0	0	0	0	0	0	0	0	0	0	0	0	0	0	0	0	0	0	0	0	0	0	0	0	0	0	0	0	0	1	11	0	0	0	0	0	0	0	0	0	0	0	0	0	0	1	0	0
ERV316A3_5q14.3g	0	0	0	0	0	0	0	1	0	0	0	0	0	0	0	0	0	0	0	0	0	0	2	0	0	0	0	0	0	0	0	82	2	0	0	1	0	0	0	0	0	0	0	0	0	0	0	0	0
ERV316A3_5q14.3h	0	1	0	1	2	0	0	0	0	0	0	0	0	3	0	0	0	0	1	0	0	0	0	0	0	0	0	0	0	0	2	40	0	0	0	0	0	0	0	0	0	0	0	0	0	0	0	3	0
ERV316A3_5q14.3i	0	0	0	0	0	0	0	0	0	0	0	0	0	0	0	0	0	0	0	0	0	0	0	0	0	0	0	0	0	0	0	6	0	0	0	0	0	0	0	0	0	0	0	0	0	0	0	0	0
ERV316A3_5q14.3j	0	0	0	0	0	0	0	0	0	0	0	0	0	0	0	0	0	0	0	0	0	0	0	0	1	0	0	0	0	0	0	12	0	0	0	0	0	0	0	0	0	0	0	0	0	0	0	0	0
ERV316A3_5q15a	0	0	0	1	0	0	13	0	0	0	0	0	0	0	0	0	2	0	0	0	0	0	1	0	0	0	0	4	20	0	0	40	0	2	0	0	3	0	0	0	1	0	0	0	0	0	0	0	0
ERV316A3_5q15b	0	1	0	0	0	0	1	0	0	0	0	0	0	2	0	0	2	6	0	0	1	0	0	1	0	0	0	0	2	3	0	4	0	0	0	0	0	0	0	0	0	0	0	0	0	0	0	0	0
ERV316A3_5q15c	0	0	0	3	0	0	1	0	0	3	0	2	0	0	0	0	0	1	0	1	0	0	0	0	0	0	0	1	2	1	2	16	0	0	0	1	1	0	1	0	0	0	0	0	1	0	1	0	0
ERV316A3_5q15d	0	0	0	0	0	0	0	0	0	0	0	0	0	0	0	0	0	0	0	0	0	0	1	0	0	0	0	0	0	0	0	25	0	0	0	0	0	0	0	0	0	0	0	0	0	0	0	0	0
ERV316A3_5q15e	0	0	0	0	0	0	0	0	0	0	0	0	0	0	0	0	0	0	1	0	0	0	0	0	0	0	0	0	0	0	0	56	0	0	0	0	0	0	0	0	0	0	0	0	0	0	0	0	0
ERV316A3_5q21.1a	0	1	0	1	1	1	1	4	0	6	0	0	0	7	1	0	2	3	2	3	1	2	6	1	0	3	1	1	4	4	1	19	3	1	1	1	1	2	1	4	1	0	1	0	5	0	1	4	1
ERV316A3_5q21.1b	0	0	0	0	0	0	0	0	0	0	0	0	0	0	0	0	0	0	0	0	0	0	0	0	0	0	0	0	0	0	0	14	0	0	0	0	0	0	0	0	0	0	0	0	0	0	0	0	0
ERV316A3_5q21.1c	1	1	0	0	0	0	0	0	0	0	0	0	0	1	0	0	0	2	0	0	0	0	0	0	0	0	0	0	1	0	1	31	1	0	0	0	0	0	0	0	0	0	0	0	1	0	0	0	0
ERV316A3_5q21.2a	0	0	0	0	0	0	0	0	0	0	0	0	0	0	0	0	0	0	0	0	0	0	0	0	0	0	0	0	0	0	0	21	0	0	0	0	0	0	0	0	0	0	0	0	0	0	0	0	0
ERV316A3_5q21.2b	0	0	0	0	0	1	0	0	0	0	0	0	0	4	0	0	0	0	0	0	0	0	1	0	0	0	0	0	0	0	0	40	0	0	0	0	0	0	0	0	0	0	0	0	1	0	0	2	0
ERV316A3_5q21.2c	0	1	0	0	0	0	0	0	0	0	0	0	0	0	0	0	0	0	0	0	0	0	0	0	0	0	0	0	0	0	0	13	0	0	0	0	0	0	0	0	0	0	0	0	0	0	0	0	0
ERV316A3_5q21.2d	0	0	0	0	0	0	0	0	0	0	0	0	0	0	0	0	0	0	0	0	0	0	0	0	0	0	0	0	0	0	0	11	0	0	1	0	0	0	0	0	0	0	0	0	0	0	0	0	0
ERV316A3_5q21.3a	0	0	0	0	0	0	0	0	0	0	0	0	0	0	0	0	0	0	0	0	0	0	0	0	0	0	0	0	0	0	0	15	0	0	0	0	0	0	0	0	0	0	0	0	0	0	0	0	0
ERV316A3_5q21.3b	0	0	0	0	0	0	0	0	0	0	0	0	0	0	0	0	0	0	0	0	0	0	0	0	0	0	0	0	0	0	0	14	0	0	0	0	0	0	0	0	0	0	0	0	0	0	0	0	0
ERV316A3_5q21.3c	0	0	0	0	0	0	0	0	0	0	0	0	0	4	0	0	0	0	0	3	0	0	1	0	1	0	0	0	0	0	0	27	0	0	0	0	0	0	0	0	0	0	0	0	0	0	0	0	0
ERV316A3_5q21.3d	0	0	0	0	0	0	0	0	0	0	0	0	0	0	0	0	0	0	0	0	0	0	0	0	0	0	0	0	0	2	0	10	0	0	0	0	0	0	0	2	0	0	0	0	0	0	0	0	0
ERV316A3_5q22.1a	0	0	0	0	0	0	0	0	0	0	0	0	0	0	0	0	0	0	0	0	0	0	0	0	0	0	0	0	0	0	0	9	0	1	0	0	0	0	0	0	0	0	0	0	0	0	0	1	0
ERV316A3_5q22.1b	0	0	0	0	0	0	0	0	0	0	0	0	0	2	0	0	0	0	0	0	0	0	0	0	0	0	0	0	0	0	0	11	0	0	0	0	0	0	0	0	1	0	0	0	0	0	0	0	0
ERV316A3_5q22.2a	0	0	0	0	0	0	0	0	0	0	0	0	0	0	0	0	0	0	0	0	0	0	0	0	0	0	0	0	0	0	0	10	0	0	0	0	0	0	0	0	0	0	0	0	0	0	0	0	0
ERV316A3_5q22.2b	0	0	0	0	0	0	0	0	0	0	0	0	0	0	0	0	0	0	0	0	0	0	0	1	0	0	0	0	0	0	0	6	0	0	0	0	0	0	0	0	0	0	0	0	0	0	0	0	0
ERV316A3_5q23.1a	2	0	0	0	0	1	0	0	0	0	0	0	0	1	0	0	0	0	1	0	0	0	1	0	1	0	0	0	0	0	2	47	0	0	0	0	0	0	0	1	1	0	0	0	1	0	1	1	0
ERV316A3_5q23.1b	2	2	0	10	4	0	0	3	2	4	0	2	1	2	1	3	3	11	1	1	8	2	9	2	6	42	0	3	1	2	1	22	12	3	1	0	5	0	0	3	6	4	3	1	10	1	2	11	7
ERV316A3_5q23.1c	0	0	0	0	0	0	1	0	0	0	0	0	0	0	0	0	0	0	0	0	0	0	0	0	0	0	0	0	0	0	0	28	0	0	0	0	0	0	0	0	0	0	0	1	0	0	0	0	0
ERV316A3_5q23.1d	0	1	2	1	0	0	0	1	0	0	0	0	0	0	0	0	1	0	0	0	0	4	2	1	0	4	0	0	0	0	0	53	0	0	0	0	0	0	0	0	0	0	0	0	0	0	0	0	0
ERV316A3_5q23.1e	0	0	0	0	0	0	0	1	0	0	0	0	0	0	0	0	0	0	0	0	0	0	0	0	0	0	0	0	0	0	0	10	0	0	0	0	0	0	0	0	0	0	0	0	0	0	0	0	0
ERV316A3_5q23.1f	0	0	0	0	0	0	0	0	0	0	0	0	0	0	0	0	0	0	0	0	0	0	0	0	0	0	0	0	0	0	0	14	0	0	0	0	0	0	0	0	0	0	0	1	0	0	0	0	0
ERV316A3_5q23.1g	0	0	0	0	0	0	0	0	0	0	0	0	0	0	0	0	0	0	0	0	0	0	0	0	0	0	0	0	0	0	0	21	0	0	0	0	0	0	0	0	0	0	0	0	0	0	0	1	0
ERV316A3_5q23.1h	0	4	0	0	0	17	0	0	0	1	0	0	0	0	1	0	0	0	0	72	0	1	1	2	0	0	0	0	1	0	2	11	0	0	0	0	0	2	0	0	1	0	0	0	0	0	0	0	0
ERV316A3_5q23.1i	0	0	0	0	0	0	0	0	0	0	0	0	0	0	0	0	0	0	0	0	0	0	1	0	0	0	0	0	0	0	0	8	0	0	0	0	0	0	0	0	0	0	0	0	0	0	0	0	0
ERV316A3_5q23.2a	0	0	0	0	0	0	0	0	0	0	0	0	0	0	0	0	0	0	0	0	0	0	0	0	0	0	0	0	0	0	0	8	0	0	0	0	0	0	0	0	0	0	0	0	0	0	0	0	0
ERV316A3_5q23.2b	0	0	0	0	0	0	0	0	0	0	0	0	0	0	0	0	0	0	0	0	0	0	0	0	0	0	0	0	1	0	0	51	0	0	0	0	0	0	0	0	0	0	0	0	0	0	0	0	0
ERV316A3_5q23.2c	0	0	0	0	0	0	0	0	0	0	0	0	0	0	0	0	0	0	0	0	0	0	0	0	0	0	0	0	0	0	0	5	0	0	0	0	0	0	0	0	0	0	0	0	0	0	0	0	0
ERV316A3_5q23.2d	0	0	0	0	0	0	0	0	0	0	0	0	0	0	0	0	0	0	0	0	0	0	0	0	0	0	0	0	0	0	0	28	0	0	0	0	0	0	0	0	0	0	0	0	0	0	0	0	0
ERV316A3_5q23.2e	0	0	0	0	0	0	0	0	0	0	0	0	0	0	0	0	0	0	0	0	0	0	0	0	0	0	0	0	0	0	0	18	0	0	0	0	0	0	0	0	0	0	0	0	0	0	0	0	0
ERV316A3_5q23.2f	0	1	0	0	0	0	0	0	0	0	0	0	0	0	0	0	0	0	0	0	0	0	1	0	0	0	0	0	0	0	0	78	0	0	0	0	0	0	0	0	1	0	0	0	0	0	0	0	0
ERV316A3_5q23.2g	0	1	0	1	0	0	0	0	0	0	0	0	0	0	0	0	0	0	0	0	0	0	0	0	0	0	0	0	0	0	0	6	0	0	0	0	0	0	0	0	0	0	0	0	0	0	0	1	0
ERV316A3_5q23.3a	0	0	0	1	3	0	0	0	0	0	0	0	0	0	1	0	0	0	0	0	0	0	0	0	1	0	0	1	0	0	4	9	3	0	0	0	0	0	0	0	0	0	0	0	0	0	1	0	0
ERV316A3_5q23.3b	11	0	0	0	1	0	0	6	0	0	0	0	0	0	0	0	0	0	0	0	0	0	1	0	0	0	0	0	0	0	52	23	0	0	0	0	0	0	0	0	0	0	0	0	0	0	0	0	0
ERV316A3_5q23.3c	0	0	0	0	0	0	0	0	0	0	0	0	0	0	0	0	0	0	0	0	0	0	0	0	0	0	0	0	0	0	0	37	0	0	0	0	0	0	0	0	0	0	0	0	0	0	0	0	0
ERV316A3_5q23.3d	0	0	0	0	0	0	0	0	0	0	0	0	0	0	0	0	0	0	0	0	0	0	1	0	0	0	0	1	0	0	0	15	0	0	0	0	0	0	0	0	0	0	0	0	1	0	0	0	0
ERV316A3_5q31.1a	0	1	0	0	1	0	2	0	0	2	0	1	0	12	0	0	0	1	0	0	0	0	1	0	0	0	0	0	1	0	0	39	2	0	0	0	0	0	0	0	0	0	0	0	0	1	0	1	1
ERV316A3_5q31.1b	0	0	0	0	0	0	0	0	0	0	0	0	0	0	0	0	0	0	0	0	0	0	0	0	0	0	0	0	0	0	1	32	0	0	0	0	0	1	0	0	0	0	0	0	2	0	0	0	0
ERV316A3_5q31.1c	0	0	0	0	0	0	0	0	0	0	0	0	0	0	0	0	0	0	0	0	0	0	0	0	0	0	0	0	0	0	0	40	0	0	1	0	0	0	0	0	0	0	0	0	0	0	0	0	0
ERV316A3_5q31.2	0	0	0	0	0	0	0	0	0	0	0	0	0	0	0	0	0	0	0	0	0	0	0	0	0	0	0	0	0	0	0	7	0	0	0	0	0	0	0	0	0	0	0	0	0	0	0	0	0
ERV316A3_5q31.3a	0	1	1	6	0	0	0	3	0	0	0	0	0	1	1	0	0	1	0	0	0	0	2	0	0	2	2	0	1	1	0	17	4	0	2	0	0	0	1	0	0	1	0	0	0	0	0	4	1
ERV316A3_5q31.3b	5	6	1	13	2	0	1	4	1	1	0	0	0	2	1	0	1	0	3	1	0	0	1	2	0	9	1	0	0	2	2	41	4	2	1	1	1	0	5	1	4	2	0	1	0	1	1	6	2
ERV316A3_5q31.3c	0	0	0	1	0	0	0	0	0	0	0	0	0	0	0	0	0	0	0	0	0	0	1	0	0	0	0	0	0	0	0	58	6	0	1	0	0	0	3	0	0	0	0	0	0	0	0	1	1
ERV316A3_5q31.3d	0	0	0	0	0	0	0	0	0	0	0	0	0	0	0	0	0	0	0	0	0	0	0	0	0	0	0	0	1	0	0	29	0	0	0	0	0	0	0	0	0	0	0	0	0	0	0	0	0
ERV316A3_5q32	0	0	0	1	0	1	1	0	0	1	0	0	1	0	0	0	1	0	0	0	1	0	3	1	0	0	0	0	1	0	1	39	3	1	0	0	1	0	1	1	0	0	0	1	4	0	0	0	1
ERV316A3_5q33.1	0	0	0	0	0	0	0	0	0	0	0	0	0	0	0	0	0	0	0	0	0	0	2	0	0	0	0	0	0	0	0	10	0	0	0	0	0	0	0	0	0	0	0	0	0	0	0	0	0
ERV316A3_5q33.2a	0	2	0	0	0	0	0	0	0	0	0	0	0	0	0	0	0	0	0	0	0	0	0	0	1	0	0	0	0	0	0	27	0	0	0	0	0	0	0	0	0	0	0	0	0	0	0	0	0
ERV316A3_5q33.2b	0	1	0	0	0	0	0	0	0	0	0	0	0	0	0	0	0	0	0	0	0	0	1	0	0	0	0	0	0	0	0	29	0	0	0	0	0	0	0	0	0	0	0	0	0	0	0	0	0
ERV316A3_5q34a	0	0	0	0	0	0	0	0	0	0	0	0	0	0	0	1	0	0	0	0	0	0	0	0	0	0	0	0	0	0	0	16	0	0	0	0	0	0	0	0	0	0	0	0	0	0	0	0	0
ERV316A3_5q34b	0	0	0	0	0	0	0	0	0	0	0	0	0	0	0	0	0	0	0	0	0	0	0	0	0	0	0	0	0	0	0	12	0	0	0	0	0	0	0	0	0	0	0	0	0	0	0	0	0
ERV316A3_5q35.1a	0	0	0	0	5	1	0	3	0	0	0	8	0	44	2	0	0	0	0	0	0	0	1	0	0	4	0	0	0	0	0	27	0	10	1	0	3	0	0	4	0	1	0	0	4	0	0	0	0
ERV316A3_5q35.1b	0	0	0	0	0	0	0	0	0	0	0	0	0	0	0	0	0	0	0	0	0	0	0	0	0	0	0	0	0	0	0	8	0	0	0	0	0	0	0	0	0	0	0	0	0	0	0	0	0
ERV316A3_5q35.2a	0	0	0	0	0	0	0	0	0	0	0	0	0	0	0	0	0	0	0	0	0	0	0	0	0	0	0	0	0	0	0	12	0	0	0	0	0	0	0	0	0	0	0	0	1	0	2	0	0
ERV316A3_5q35.2b	0	30	0	0	10	4	25	2	7	31	0	13	2	5	7	7	0	54	0	8	11	10	15	23	0	1	4	2	8	86	16	76	8	10	0	6	0	39	0	3	0	1	20	2	6	4	29	3	3
ERV316A3_5q35.3a	2	9	21	0	5	28	6	0	12	7	0	0	0	3	0	2	5	7	3	13	3	6	0	15	11	0	0	0	1	14	2	28	2	1	3	0	5	4	4	4	2	1	2	0	1	0	8	10	1
ERV316A3_5q35.3b	0	0	0	0	0	0	0	0	0	0	0	0	1	0	0	0	0	0	0	0	0	0	0	0	0	0	0	0	0	0	0	8	0	0	0	0	0	0	0	0	0	0	0	0	0	0	0	0	0
ERV316A3_5q35.3c	0	1	0	0	0	0	1	0	0	0	0	0	0	1	0	0	0	0	1	0	0	0	0	2	0	0	2	0	0	0	2	6	12	0	4	0	1	1	1	0	3	0	0	0	0	1	0	4	0
ERV316A3_5q35.3d	0	4	0	1	1	1	1	2	0	1	0	1	0	0	0	0	0	1	0	5	0	0	6	2	2	1	3	0	6	3	6	11	16	0	3	1	5	2	0	0	5	0	0	1	1	0	1	7	2
ERV316A3_6p12.2	0	1	0	0	0	0	0	0	0	0	0	0	0	0	0	0	0	0	0	0	0	0	0	1	0	0	0	0	0	0	0	14	0	0	0	0	0	0	0	1	0	0	0	0	0	0	0	0	0
ERV316A3_6p12.3a	0	0	0	0	1	0	0	1	0	0	0	0	0	0	0	0	0	0	0	0	0	0	0	0	0	18	0	0	0	0	0	26	0	0	0	0	0	0	0	0	0	0	0	0	0	0	0	0	0
ERV316A3_6p12.3b	0	0	8	1	13	0	0	0	0	5	0	0	0	0	0	1	0	0	0	0	0	2	0	2	1	0	1	0	0	0	0	30	3	0	0	0	1	0	0	0	0	0	0	0	0	0	1	0	0
ERV316A3_6p12.3c	0	0	0	0	0	0	0	0	0	1	0	0	0	0	0	0	0	0	0	0	0	0	0	0	0	0	0	0	0	0	0	40	0	0	0	0	0	0	0	0	0	0	0	0	0	0	0	0	0
ERV316A3_6p21.2a	1	1	0	1	1	0	0	0	0	3	0	0	0	2	0	0	0	0	1	3	0	0	3	1	2	0	0	1	0	1	1	14	4	0	1	0	0	0	1	2	3	1	2	1	12	0	0	0	3
ERV316A3_6p21.2b	0	2	0	0	1	0	0	1	0	2	0	0	0	0	0	0	0	0	0	1	0	0	1	0	1	2	0	0	1	0	0	9	4	0	0	0	0	0	0	1	1	3	2	0	5	0	1	1	3
ERV316A3_6p21.2c	0	0	0	0	0	0	0	0	0	0	0	0	0	0	0	0	0	0	0	0	0	0	0	0	0	0	0	0	0	0	0	47	0	0	0	0	0	0	0	0	0	0	0	0	0	0	0	0	0
ERV316A3_6p21.2d	0	0	0	0	0	0	0	0	0	0	0	0	0	0	0	0	0	0	0	1	0	0	0	0	0	0	0	0	0	0	0	37	0	0	0	0	0	0	0	0	0	0	0	0	0	0	0	0	0
ERV316A3_6p21.31	0	0	0	0	0	0	0	0	0	0	0	0	0	0	0	0	0	0	0	0	0	0	0	0	0	0	0	0	0	0	0	5	0	0	0	0	0	0	0	0	0	0	0	0	1	0	0	0	0
ERV316A3_6p21.33a	0	0	1	0	3	0	0	0	4	2	0	0	0	0	0	0	0	1	1	2	0	0	2	1	0	0	0	0	2	4	7	13	39	2	0	0	0	0	0	1	1	0	0	0	5	3	114	0	2
ERV316A3_6p21.33b	7	9	1	1	2	0	5	2	2	21	0	0	5	6	7	3	0	1	1	1	10	0	9	8	3	4	2	13	15	4	8	33	4	0	0	2	4	1	7	9	4	6	5	1	16	3	6	1	4
ERV316A3_6p21.33c	11280	3539	2965	1720	8758	1422	4523	4009	6409	6446	699	901	2183	2377	5338	711	8474	4699	4156	1482	5600	176	3383	3119	957	1126	1907	631	571	1474	3626	416	4144	2240	1708	2054	479	6014	1279	4135	2417	2958	2481	851	2207	1956	1947	1332	5096
ERV316A3_6p22.1a	0	0	1	1	2	2	1	2	1	0	0	0	0	0	3	0	1	7	0	1	1	0	0	2	1	0	1	0	8	0	3	14	4	0	1	1	2	0	1	0	6	1	1	0	0	2	1	3	0
ERV316A3_6p22.1b	1	14	8	26	14	5	6	19	8	21	1	7	6	2	10	0	8	4	9	7	5	9	11	7	7	0	5	8	29	41	16	52	18	2	1	0	4	11	3	3	6	7	10	0	33	3	7	13	5
ERV316A3_6p22.1c	0	0	0	0	0	0	0	0	0	0	0	0	0	0	0	0	0	0	0	0	0	0	1	0	0	0	0	0	0	0	0	7	0	0	0	0	0	0	0	0	0	0	0	0	0	0	0	0	0
ERV316A3_6p22.1d	0	0	0	0	0	0	0	0	0	0	0	0	0	0	0	0	0	0	0	0	0	0	0	1	0	0	0	0	0	1	0	37	0	0	1	0	0	0	0	0	0	0	0	0	1	0	0	0	0
ERV316A3_6p22.1e	0	0	0	0	0	0	0	0	0	0	0	0	0	0	0	0	0	0	0	0	0	0	0	1	0	0	0	0	0	0	0	9	0	0	0	0	0	0	0	0	0	0	0	0	0	0	0	0	0
ERV316A3_6p22.1f	0	1	0	1	5	1	0	0	0	6	0	0	0	2	1	0	0	0	0	1	4	0	1	0	0	0	2	0	1	0	4	41	0	1	2	0	1	0	3	2	3	0	0	0	3	0	0	3	1
ERV316A3_6p22.1g	0	1	0	0	0	0	0	1	0	1	0	0	0	2	0	0	0	1	0	0	1	0	1	0	1	1	0	0	1	4	0	30	3	1	0	0	0	0	0	0	1	0	0	0	1	0	0	5	0
ERV316A3_6p22.1h	0	0	0	0	0	0	0	0	0	0	0	0	0	0	0	0	0	0	0	0	0	0	1	0	0	0	0	2	0	0	0	38	1	0	0	0	1	1	0	4	0	1	0	0	0	1	1	0	0
ERV316A3_6p22.1i	9	3	3	3	21	0	12	53	2	8	0	3	1	26	4	2	0	6	18	8	19	3	11	7	0	49	59	11	29	9	3	14	116	0	23	3	68	7	7	47	21	31	13	0	48	25	109	28	25
ERV316A3_6p22.1j	0	0	0	0	0	0	0	0	0	0	0	0	0	0	0	0	0	0	0	0	0	0	0	0	0	0	0	0	0	0	0	32	0	0	0	0	0	0	0	0	0	0	0	0	0	0	0	0	0
ERV316A3_6p22.1k	1	8	2	0	10	1	1	2	6	2	2	2	2	8	5	0	0	5	5	0	4	0	22	14	5	10	0	0	6	12	16	44	4	7	0	8	1	9	4	12	5	14	1	2	19	14	2	2	7
ERV316A3_6p22.1l	2	4	1	1	5	1	5	0	0	1	0	4	0	5	1	0	1	1	0	7	17	2	2	0	4	0	0	1	7	5	3	4	16	0	4	0	1	0	0	0	2	2	4	1	2	0	4	6	16
ERV316A3_6p22.1m	0	4	1	0	1	0	4	2	0	1	0	1	0	1	1	1	1	5	3	0	4	1	1	2	0	0	0	1	1	1	11	29	8	1	3	8	3	1	0	3	5	5	1	0	6	0	0	4	5
ERV316A3_6p22.1n	101	33	91	4	395	11	75	37	106	36	60	16	62	64	297	10	12	32	34	85	53	2	217	262	720	30	124	11	229	185	43	86	73	100	53	38	21	180	50	264	159	46	99	42	224	158	110	205	663
ERV316A3_6p22.1o	30	15	20	66	21	3	6	55	18	22	3	25	13	33	36	20	14	52	2	28	35	88	22	19	12	16	41	34	22	60	16	63	71	13	20	20	7	12	6	18	44	18	42	4	14	16	14	26	24
ERV316A3_6p22.1p	3	1	0	9	3	1	0	7	1	0	1	0	0	9	1	0	0	1	2	2	3	3	3	2	1	6	0	0	16	14	0	19	2	1	0	0	1	1	4	1	11	6	6	0	16	2	1	4	7
ERV316A3_6p22.2	0	0	0	0	0	0	0	0	0	0	0	0	0	0	0	0	0	0	0	0	0	0	0	0	0	0	0	0	0	0	0	18	0	0	0	0	0	0	0	0	0	0	0	0	0	0	0	1	0
ERV316A3_6p22.3a	0	0	0	0	0	0	0	0	0	0	0	0	0	0	0	0	0	0	0	0	0	0	0	0	0	0	0	0	0	0	0	34	0	0	0	0	0	0	0	0	0	0	0	0	1	0	0	0	0
ERV316A3_6p22.3b	0	0	0	0	5	0	1	2	0	0	0	0	0	0	0	0	0	0	0	0	1	0	2	2	0	0	0	0	1	2	0	36	0	0	1	0	0	1	0	0	0	0	3	0	1	0	1	2	0
ERV316A3_6p22.3c	0	0	0	0	6	0	0	0	0	0	0	0	0	0	1	0	0	0	0	0	0	0	0	0	0	0	0	0	0	0	0	39	0	0	0	0	0	0	0	0	0	0	0	0	0	0	0	0	0
ERV316A3_6p22.3d	0	0	0	0	0	0	0	0	0	1	0	0	0	0	0	0	3	0	0	0	0	1	0	0	0	0	0	1	0	0	2	12	0	0	0	0	0	0	0	0	1	0	0	0	0	0	0	0	0
ERV316A3_6p22.3e	0	0	0	0	0	0	0	1	0	0	0	0	0	0	1	0	0	0	0	0	0	0	0	0	0	0	0	0	0	0	0	36	0	0	0	0	0	0	0	0	0	0	0	0	0	0	0	0	0
ERV316A3_6p22.3f	2	0	0	0	0	0	0	0	0	0	0	0	0	0	0	0	0	0	0	0	0	0	0	0	0	0	0	0	0	0	0	34	0	0	0	0	0	0	0	0	0	0	0	0	0	0	0	0	0
ERV316A3_6p23	0	0	0	0	0	0	0	0	0	0	0	0	0	0	0	0	0	0	0	1	0	0	0	0	0	0	0	0	0	0	0	29	0	0	0	0	0	0	0	0	0	0	0	0	0	0	0	0	0
ERV316A3_6p24.2	0	0	0	0	0	0	0	0	0	0	0	0	0	0	0	0	1	0	0	0	0	0	0	0	0	0	0	0	0	0	0	15	0	0	0	0	0	0	0	0	0	0	0	0	0	2	1	1	1
ERV316A3_6p24.3a	0	0	1	0	0	0	0	0	0	0	0	0	0	0	0	0	1	0	0	0	0	0	0	0	0	0	0	0	0	0	0	33	0	0	0	0	0	0	0	0	0	0	0	0	1	0	0	0	0
ERV316A3_6p24.3b	0	0	0	0	0	0	0	0	0	0	0	0	0	0	0	0	0	0	0	0	0	0	0	0	0	0	0	0	0	0	0	18	0	0	0	0	0	0	0	0	0	0	0	0	0	0	0	0	0
ERV316A3_6p24.3c	0	0	0	1	2	0	0	0	0	0	0	2	0	0	0	0	0	0	1	0	0	0	0	0	0	1	0	1	0	0	7	17	0	0	0	0	0	0	0	0	0	0	0	0	0	0	0	1	0
ERV316A3_6p24.3d	0	0	0	0	0	0	0	0	0	0	0	0	0	0	0	0	0	0	0	0	0	0	0	0	0	0	0	0	0	0	0	9	0	0	0	0	0	0	0	0	0	0	0	0	0	0	0	0	0
ERV316A3_6p24.3e	1	1	0	1	2	5	0	4	0	0	1	0	3	9	4	2	0	1	1	0	3	8	11	11	1	0	0	2	8	34	15	9	2	0	31	2	1	0	3	0	1	1	1	0	2	82	0	9	0
ERV316A3_6p25.1a	0	1	2	2	17	2	2	0	0	0	0	0	0	0	1	0	0	0	0	0	1	0	1	0	0	0	0	0	0	0	1	11	0	0	0	0	0	1	0	0	0	0	0	0	0	0	2	0	0
ERV316A3_6p25.1b	3	28	4	7	34	4	7	14	6	19	2	5	2	24	9	4	34	46	20	27	42	20	27	19	20	27	15	15	102	29	36	23	46	2	11	3	19	12	47	21	5	11	18	9	27	33	16	18	7
ERV316A3_6p25.1c	0	2	1	0	1	1	2	0	2	1	2	0	0	12	0	0	4	0	0	3	1	1	1	3	3	0	1	4	6	1	24	24	5	1	2	0	0	0	4	1	3	0	3	1	1	0	2	0	0
ERV316A3_6p25.1d	10	14	0	8	44	8	36	16	3	27	0	8	7	10	16	0	39	1	13	12	11	15	4	1	12	28	43	44	2	23	50	25	2	3	16	4	16	3	9	4	10	0	30	16	31	3	5	5	6
ERV316A3_6p25.1e	2	2	0	0	0	0	1	0	0	0	0	0	0	0	0	0	2	1	1	0	0	0	1	6	2	0	0	0	6	6	1	15	0	2	0	2	0	1	1	1	2	0	1	2	21	1	1	1	24
ERV316A3_6p25.2a	0	0	1	0	0	0	0	0	0	0	0	0	0	0	0	0	3	1	8	0	0	0	1	0	1	0	0	0	0	1	0	23	0	1	1	0	1	0	0	2	0	0	0	0	0	0	0	0	2
ERV316A3_6p25.2b	0	1	0	0	1	0	0	1	0	1	0	0	0	1	0	0	0	1	1	5	0	1	2	0	1	1	0	0	1	0	2	41	0	0	1	0	0	0	0	1	0	0	0	0	1	0	0	0	0
ERV316A3_6p25.2c	11	1	0	2	6	0	1	0	0	0	0	5	0	0	4	0	0	1	0	0	0	0	0	0	0	0	3	4	37	11	72	32	1	1	1	0	0	1	0	1	0	0	3	0	3	1	0	1	1
ERV316A3_6p25.3a	0	3	0	0	1	0	1	0	1	0	0	11	0	0	0	1	0	0	2	1	0	0	2	0	0	1	0	3	5	2	14	9	8	0	2	1	2	3	0	0	3	0	0	0	4	0	2	2	2
ERV316A3_6p25.3b	0	0	1	0	11	0	6	0	0	2	0	12	0	1	0	0	4	1	0	0	0	0	1	0	1	0	0	0	1	1	0	39	0	0	0	0	3	0	1	1	2	1	1	0	1	0	1	0	1
ERV316A3_6q11.1	0	0	0	0	0	0	0	0	0	0	0	0	0	0	0	0	0	1	0	0	0	0	0	0	1	0	0	0	0	0	0	41	0	0	0	0	0	0	0	0	0	0	0	0	1	0	0	0	0
ERV316A3_6q12a	0	0	0	0	0	0	0	0	0	0	0	0	0	0	0	0	0	0	0	0	0	0	1	0	0	0	0	0	0	0	0	25	0	0	0	0	0	0	0	0	0	0	0	0	0	0	0	0	0
ERV316A3_6q12b	0	0	0	0	0	0	0	0	0	0	0	0	0	0	0	0	0	0	0	0	0	0	1	0	0	0	0	0	0	0	0	20	0	0	0	0	0	0	0	0	0	0	0	0	0	0	0	0	0
ERV316A3_6q12c	0	0	0	0	0	0	0	0	0	0	0	0	0	0	0	0	0	0	0	0	0	0	0	0	0	0	0	0	0	0	0	11	0	0	0	0	0	0	1	0	0	0	0	0	0	0	0	0	0
ERV316A3_6q12d	0	0	0	0	0	0	0	0	0	0	0	0	0	0	0	0	0	0	0	0	0	0	1	0	0	0	0	0	0	0	0	8	0	0	0	0	0	0	0	0	0	0	0	0	0	0	0	0	0
ERV316A3_6q12e	0	0	0	0	0	0	0	0	0	0	0	0	0	0	0	0	0	0	0	0	0	0	0	0	0	0	0	0	0	0	1	24	0	0	0	0	0	0	0	0	0	0	0	0	0	0	0	0	0
ERV316A3_6q12f	0	0	0	0	0	0	0	0	0	0	0	0	0	0	0	0	0	0	0	0	0	0	0	0	0	0	0	0	0	0	0	43	0	0	0	0	0	0	0	0	0	0	0	0	0	0	0	0	0
ERV316A3_6q12g	0	0	0	0	0	0	0	0	0	0	0	0	0	0	0	0	0	0	0	0	0	0	0	0	0	0	0	0	0	0	0	40	0	0	0	0	0	0	0	0	0	0	0	0	0	0	0	0	0
ERV316A3_6q13a	0	0	0	0	0	0	0	0	0	0	0	0	0	0	0	0	0	0	0	0	0	0	1	0	0	0	0	0	0	0	0	15	0	0	0	0	0	0	0	0	0	0	0	0	0	0	0	0	0
ERV316A3_6q13b	0	8	8	15	6	7	1	11	1	15	0	1	1	32	12	2	5	10	18	13	1	8	10	4	4	2	7	4	19	23	14	16	12	4	3	2	5	4	7	8	6	7	3	4	17	1	18	7	2
ERV316A3_6q14.1a	0	1	0	0	0	1	0	0	1	0	0	0	0	8	0	0	0	0	0	0	2	5	0	1	3	4	0	0	0	0	0	22	0	0	4	0	0	2	0	0	0	0	0	0	0	0	0	2	2
ERV316A3_6q14.1b	0	0	0	0	0	0	0	0	0	0	0	0	0	0	0	0	0	0	0	0	0	0	0	0	0	0	0	0	0	0	0	17	0	0	0	0	0	0	0	0	0	0	0	0	0	0	0	0	0
ERV316A3_6q14.1c	0	0	0	0	0	0	0	0	0	0	0	0	0	0	0	0	0	0	0	0	0	0	0	0	0	0	0	0	0	0	0	9	0	0	0	0	0	0	0	0	0	0	0	0	0	0	0	0	0
ERV316A3_6q14.1d	0	0	0	0	0	0	0	0	0	0	0	0	0	0	0	0	0	0	0	0	0	0	0	0	0	0	0	0	0	0	0	2	0	0	0	0	0	0	0	0	0	0	0	0	0	0	0	0	0
ERV316A3_6q14.1e	0	0	0	1	2	0	0	0	1	0	0	0	0	0	0	0	0	0	0	0	0	0	2	0	0	0	0	0	0	0	0	49	0	0	0	0	0	0	0	0	1	0	0	0	0	0	0	0	0
ERV316A3_6q14.2	0	1	0	0	0	1	0	0	1	0	0	0	0	7	1	0	10	1	1	7	1	4	1	3	1	0	0	0	3	0	6	19	0	0	0	0	0	3	6	0	0	0	0	0	0	0	2	3	0
ERV316A3_6q14.3a	0	0	0	0	0	0	0	0	0	0	0	0	0	0	0	0	0	0	0	0	0	0	0	0	0	0	0	0	0	0	0	9	0	0	0	0	0	0	0	0	0	0	0	0	0	0	0	0	0
ERV316A3_6q14.3b	0	0	0	0	0	0	0	0	0	0	0	0	0	16	0	0	0	0	0	0	0	0	3	5	0	0	0	0	0	0	0	11	3	0	0	0	0	0	0	0	0	0	0	0	0	0	0	0	0
ERV316A3_6q14.3c	0	0	0	0	0	0	0	0	0	0	0	0	0	0	0	0	0	0	0	0	0	0	1	0	0	0	0	0	0	0	0	26	0	0	0	0	0	0	0	0	0	0	0	0	0	0	0	0	0
ERV316A3_6q14.3d	0	0	0	0	0	0	0	0	0	0	0	0	0	0	0	0	0	0	0	0	0	0	1	0	0	0	0	0	0	0	0	23	0	0	0	0	0	0	0	0	1	0	0	0	0	0	0	0	0
ERV316A3_6q14.3e	0	1	1	1	0	0	0	6	0	0	0	1	0	5	0	0	0	0	0	1	0	0	2	1	0	4	0	0	1	4	5	54	0	0	0	0	5	3	0	0	2	0	1	0	0	0	2	0	0
ERV316A3_6q15a	1	0	1	0	0	0	0	0	0	0	0	0	0	1	0	0	0	0	1	0	0	0	0	0	0	1	0	1	1	0	0	17	2	0	0	0	0	0	0	0	0	0	0	1	1	0	0	2	0
ERV316A3_6q15b	0	0	0	0	0	0	0	0	0	0	0	0	0	0	0	0	0	0	0	0	0	0	1	0	0	0	0	0	0	0	0	29	0	0	0	0	0	0	0	0	0	0	0	0	0	0	0	0	0
ERV316A3_6q16.1a	0	0	0	0	1	0	1	1	0	0	0	0	0	0	2	0	0	0	0	1	1	0	2	0	1	0	0	0	0	0	0	35	0	0	0	0	0	1	0	0	0	1	1	0	0	0	0	0	1
ERV316A3_6q16.1b	0	0	0	0	0	0	0	2	0	0	0	0	0	0	0	1	0	0	0	0	2	2	1	0	0	22	0	0	0	21	1	8	0	3	0	0	0	0	0	0	0	0	1	0	1	0	0	0	0
ERV316A3_6q16.1c	0	0	0	0	0	0	0	0	1	0	2	0	0	0	0	0	0	0	0	0	0	2	0	1	0	0	0	0	0	0	0	21	0	0	0	0	0	0	0	1	0	0	0	0	1	0	0	0	0
ERV316A3_6q16.1d	0	0	0	0	0	0	1	0	0	0	0	0	0	0	0	0	0	0	0	0	0	0	0	0	0	1	0	0	0	1	0	14	0	0	0	0	0	0	0	0	0	0	0	0	0	0	0	0	0
ERV316A3_6q16.1e	0	0	0	0	0	0	0	0	0	0	0	0	0	0	0	1	0	0	0	0	0	0	0	0	0	0	0	0	0	0	0	16	0	0	0	0	0	0	0	0	0	0	0	1	0	0	0	0	0
ERV316A3_6q16.2	0	1	0	0	0	0	0	1	0	0	0	0	0	0	1	0	0	0	0	0	0	0	0	0	0	0	0	0	0	0	0	16	0	0	0	0	0	0	0	0	0	0	0	0	0	0	0	0	0
ERV316A3_6q16.3a	0	0	0	0	0	0	0	0	0	0	0	0	0	0	0	0	0	0	0	0	0	0	1	0	0	0	0	0	0	0	0	4	0	0	0	0	0	0	0	0	0	0	0	0	0	0	0	0	0
ERV316A3_6q16.3b	0	0	0	0	0	0	0	0	0	0	0	0	0	0	0	0	0	0	0	0	0	0	1	0	0	0	0	0	0	0	0	31	0	0	0	0	0	0	0	0	0	0	0	0	0	0	0	0	0
ERV316A3_6q21a	0	0	0	3	0	0	0	0	0	0	0	0	0	0	0	0	1	0	0	0	0	0	0	0	0	0	0	0	0	2	0	11	0	0	0	0	0	0	0	0	0	0	0	0	0	0	0	0	0
ERV316A3_6q21b	0	0	0	0	1	0	0	0	1	0	0	0	0	0	0	0	0	0	0	0	0	0	1	0	0	0	0	0	0	1	0	12	3	0	0	0	0	0	0	0	0	0	0	0	0	0	0	1	0
ERV316A3_6q21c	0	1	0	0	1	0	0	0	0	0	0	0	0	0	0	0	0	0	0	0	0	0	0	0	0	0	0	0	0	0	0	9	0	0	0	0	0	0	0	0	0	0	0	0	0	0	0	0	1
ERV316A3_6q21d	0	0	0	0	0	0	0	0	0	0	0	0	0	0	0	0	0	0	0	0	0	0	0	0	0	0	0	0	0	0	0	7	0	0	0	0	0	0	0	0	0	0	0	0	0	0	0	0	0
ERV316A3_6q22.1a	0	0	0	0	0	0	0	1	0	0	0	0	0	0	0	0	0	0	0	0	0	0	1	0	0	0	0	0	0	0	0	19	0	0	0	0	0	0	0	0	1	0	0	0	0	0	0	1	0
ERV316A3_6q22.1b	0	0	0	0	0	0	1	0	0	0	0	0	0	0	0	0	0	0	0	0	0	0	1	0	0	0	0	0	0	1	0	52	0	0	0	0	0	0	0	0	0	1	0	0	0	0	0	0	0
ERV316A3_6q22.1c	0	2	0	0	1	0	0	9	0	0	0	5	0	16	0	0	0	0	0	6	0	0	1	0	3	0	1	3	1	2	27	42	18	0	2	0	0	0	0	2	1	2	0	1	4	0	0	5	0
ERV316A3_6q22.1d	0	0	0	0	0	0	0	0	0	0	0	0	0	0	0	0	0	0	0	0	0	0	0	0	0	0	0	0	0	0	0	17	0	0	0	0	0	0	0	0	0	1	0	0	0	0	0	0	0
ERV316A3_6q22.31a	0	2	0	0	1	0	1	1	0	1	0	3	0	1	2	0	2	0	0	2	0	1	2	1	0	2	0	0	0	0	2	16	8	1	1	1	0	0	1	2	4	0	1	1	0	0	1	3	2
ERV316A3_6q22.31b	0	0	0	0	0	0	0	0	0	0	0	0	0	0	0	0	0	0	2	0	0	0	0	0	1	0	0	0	0	0	0	14	0	2	0	0	0	0	0	0	1	0	0	0	1	0	0	0	0
ERV316A3_6q22.31c	0	0	0	2	0	0	0	0	0	0	0	0	0	0	0	0	0	0	0	0	0	0	1	0	0	0	0	0	0	0	0	17	0	0	0	0	0	0	0	0	0	0	0	0	0	0	0	0	0
ERV316A3_6q22.31d	0	0	0	0	0	0	0	0	0	0	0	0	0	0	0	0	0	0	0	0	0	0	0	0	0	0	0	0	0	0	0	20	0	0	0	0	0	0	0	0	0	0	0	0	0	0	0	0	0
ERV316A3_6q22.31e	0	0	0	0	0	0	0	0	0	0	0	0	0	0	0	0	0	0	0	0	0	0	0	0	0	0	0	0	0	0	0	25	0	0	0	0	0	0	0	0	0	0	0	0	0	0	0	0	0
ERV316A3_6q22.31f	0	16	8	0	0	4	3	0	7	5	0	0	0	0	18	3	1	0	0	2	12	26	2	3	1	0	0	0	0	0	0	18	0	0	0	0	0	0	1	0	0	0	0	0	0	0	0	0	0
ERV316A3_6q22.31g	0	7	2	0	0	5	2	0	2	6	0	2	0	1	6	0	4	1	0	11	8	15	3	2	1	1	0	14	0	0	3	35	2	1	0	0	0	1	3	3	3	0	3	0	4	0	0	1	0
ERV316A3_6q22.31h	0	0	0	0	0	0	0	0	0	0	0	0	0	0	0	0	0	0	0	0	0	0	1	0	0	0	0	0	0	0	0	12	0	0	0	0	0	0	0	0	0	0	0	0	0	0	0	0	0
ERV316A3_6q22.33	0	0	4	0	3	0	1	0	1	12	0	5	0	0	1	0	0	0	3	2	0	30	5	7	2	1	0	4	1	2	1	17	0	0	0	2	0	0	0	1	1	4	11	0	0	0	0	0	8
ERV316A3_6q23.2a	0	0	0	0	0	0	0	0	0	0	0	0	0	0	0	0	0	0	0	0	0	0	0	0	0	0	0	0	0	0	0	10	0	0	0	0	0	0	0	0	0	0	0	0	0	0	0	0	0
ERV316A3_6q23.2b	0	0	1	0	1	0	0	0	0	0	0	1	0	0	2	0	0	0	0	0	0	0	1	0	0	0	0	1	0	0	0	21	0	1	0	0	0	0	0	0	0	0	1	0	1	0	0	1	4
ERV316A3_6q23.2c	0	0	0	0	0	0	0	0	0	0	0	0	0	0	0	0	0	0	0	0	0	0	0	0	0	0	0	0	0	0	0	7	0	1	0	0	0	0	0	0	0	0	0	0	0	0	0	0	0
ERV316A3_6q23.3a	0	0	0	0	0	0	0	0	0	0	0	0	0	1	0	0	0	0	0	0	0	0	3	0	0	0	0	0	0	1	0	43	0	0	0	0	0	2	0	0	0	1	0	0	1	0	0	0	0
ERV316A3_6q23.3b	0	0	0	0	4	0	1	0	0	0	0	0	0	4	1	0	1	0	0	0	0	0	1	7	0	0	0	0	0	16	0	19	1	0	0	0	0	0	3	0	0	0	0	2	1	0	0	0	0
ERV316A3_6q24.1a	94	244	296	149	170	120	126	428	47	538	39	125	63	399	178	125	237	963	197	400	215	241	585	604	326	564	334	888	408	1277	268	109	300	127	414	174	293	317	698	234	294	120	380	481	907	614	335	722	389
ERV316A3_6q24.1b	0	0	0	0	0	0	0	0	0	0	0	0	0	0	0	0	0	0	0	0	0	0	0	0	0	0	0	0	0	0	0	3	0	0	0	0	0	0	0	0	0	0	0	0	0	0	0	0	0
ERV316A3_6q24.1c	0	0	0	0	0	0	0	0	0	0	0	0	0	0	0	0	0	0	0	0	0	0	0	0	0	0	0	0	0	0	0	10	0	0	0	0	0	0	0	0	0	0	0	0	0	0	0	1	0
ERV316A3_6q24.1d	0	0	0	0	0	0	0	0	0	0	0	0	0	0	0	0	0	0	0	0	0	0	2	0	0	0	0	0	0	0	0	31	0	0	0	0	0	0	0	0	0	0	0	0	0	0	0	0	0
ERV316A3_6q24.1e	0	0	0	0	0	0	0	0	0	0	0	0	0	0	0	0	0	0	0	0	0	0	0	0	0	0	0	0	0	0	0	24	0	0	0	0	0	0	0	0	0	0	0	0	0	0	0	0	0
ERV316A3_6q24.1f	0	0	0	0	0	0	0	0	0	0	0	0	0	0	0	0	0	0	0	0	0	0	0	0	0	0	0	0	0	0	0	4	0	0	0	0	0	0	0	0	0	0	0	0	0	0	0	0	0
ERV316A3_6q24.1g	3	0	0	0	1	0	0	0	0	0	0	0	0	0	0	0	0	0	0	0	0	0	1	0	0	0	0	0	0	0	0	39	0	0	0	0	0	0	0	0	0	0	0	0	0	0	0	0	0
ERV316A3_6q24.1h	0	0	0	0	1	0	0	0	0	0	0	0	0	1	0	0	0	0	0	0	0	0	0	0	0	0	1	0	0	0	0	44	0	0	0	0	0	0	1	0	0	0	0	0	0	0	0	3	0
ERV316A3_6q24.2a	23	0	0	0	100	10	0	9	6	0	0	0	1	10	0	13	0	0	5	5	0	1	0	0	0	0	0	0	2	3	8	16	0	58	0	0	0	32	0	0	2	22	8	0	0	0	9	64	0
ERV316A3_6q24.2b	0	0	0	0	0	0	0	0	0	1	0	0	0	1	0	0	0	0	0	0	0	1	3	1	0	0	0	0	0	6	0	69	0	0	0	0	0	0	0	0	0	0	0	0	0	0	0	0	0
ERV316A3_6q24.3a	0	0	0	0	0	0	0	0	0	0	0	0	0	1	0	0	0	0	0	0	0	0	0	0	0	0	0	0	0	0	0	27	0	0	0	0	0	0	0	0	0	0	0	0	0	0	0	0	0
ERV316A3_6q24.3b	0	0	0	0	0	0	0	0	0	0	0	0	0	0	0	0	0	0	0	0	0	0	1	0	0	0	0	0	0	0	0	15	0	0	0	0	0	0	0	0	0	0	0	0	0	0	0	0	0
ERV316A3_6q25.1a	0	0	0	0	0	0	0	0	0	0	0	0	0	0	0	0	0	0	0	0	0	0	2	0	0	0	0	0	0	0	0	10	0	0	0	0	0	0	0	0	0	0	0	0	0	0	0	0	0
ERV316A3_6q25.1b	0	0	0	0	0	0	0	0	1	4	0	0	1	1	0	0	0	0	0	0	0	0	0	0	0	1	0	0	0	1	0	30	0	0	0	4	0	1	1	0	0	0	0	0	1	0	0	0	3
ERV316A3_6q25.1c	0	0	0	2	1	1	0	0	0	1	0	1	0	0	0	0	2	0	0	0	0	0	3	2	0	0	1	0	0	2	1	37	2	0	0	0	0	0	0	2	0	0	0	0	0	0	0	0	1
ERV316A3_6q25.1d	3	5	0	2	2	0	1	9	0	4	1	2	0	9	1	0	6	0	11	8	0	0	15	18	1	34	5	6	8	5	1	18	3	5	0	0	5	9	0	12	0	6	3	1	6	0	0	4	12
ERV316A3_6q25.1e	0	0	0	0	0	0	0	0	0	0	0	0	0	0	0	0	0	0	0	0	0	0	0	0	0	0	0	0	0	0	0	0	0	0	0	0	0	0	0	0	0	0	0	0	0	0	0	0	0
ERV316A3_6q25.1f	0	0	0	0	1	0	1	0	0	0	0	0	1	0	0	0	0	0	0	1	0	0	3	2	0	0	0	0	0	2	0	8	4	0	0	0	1	0	0	0	0	0	0	2	0	0	1	0	0
ERV316A3_6q25.1g	0	1	0	0	7	0	0	1	0	1	0	3	0	1	0	0	0	0	4	3	0	0	1	5	1	0	1	0	9	0	0	19	1	0	0	0	0	3	0	0	0	0	0	1	0	1	3	0	0
ERV316A3_6q25.1h	0	0	0	0	0	0	0	0	0	2	0	0	0	0	0	0	1	0	0	0	0	0	0	1	0	0	0	0	1	0	0	4	3	0	2	1	1	1	0	0	1	0	0	0	0	0	0	0	0
ERV316A3_6q25.1i	0	0	0	0	0	0	0	0	0	0	0	0	0	0	0	0	0	1	0	0	0	0	2	0	0	0	0	0	0	0	0	26	0	0	0	0	0	0	0	0	0	0	0	0	0	0	0	0	0
ERV316A3_6q25.2a	0	0	0	0	1	0	0	0	0	0	0	0	0	0	0	0	0	0	0	0	0	0	0	0	0	0	0	0	0	0	1	24	0	0	0	0	0	0	0	0	0	0	0	0	0	0	0	0	0
ERV316A3_6q25.2b	0	0	0	0	0	0	0	0	0	0	0	0	0	0	0	0	0	0	0	0	0	0	0	0	0	0	0	0	0	0	1	15	0	0	0	0	0	0	0	0	0	0	0	0	0	0	0	0	0
ERV316A3_6q25.2c	0	0	0	0	2	0	0	0	0	0	0	0	0	0	0	0	0	0	0	0	0	0	0	0	0	0	0	0	0	0	2	17	0	0	0	0	0	0	0	0	0	0	0	1	0	0	0	0	0
ERV316A3_6q25.2d	0	0	0	0	0	0	0	0	0	0	0	0	0	0	0	0	0	0	0	0	0	0	2	0	0	0	0	0	0	0	1	25	0	0	0	0	0	0	0	0	0	0	0	1	0	0	0	0	0
ERV316A3_6q25.2e	0	0	0	0	0	0	0	0	0	0	0	0	0	1	0	0	0	0	0	0	0	0	0	0	0	0	0	0	0	0	1	13	0	0	0	0	0	0	0	0	0	0	0	0	0	0	0	0	0
ERV316A3_6q25.3	0	0	0	0	3	0	0	0	0	0	0	0	0	0	0	0	0	0	0	0	0	0	0	0	0	0	0	0	0	1	0	35	0	0	0	0	0	0	0	0	0	0	0	0	0	0	0	0	0
ERV316A3_6q26a	1	0	0	1	0	1	1	1	0	1	0	0	0	0	0	0	0	0	1	0	1	0	0	0	1	1	0	1	1	0	4	32	1	0	2	0	0	0	0	0	0	0	0	0	2	0	0	0	0
ERV316A3_6q26b	0	0	0	11	2	0	0	0	0	0	0	0	0	1	0	0	0	0	0	0	0	1	4	15	2	0	0	0	0	1	1	17	0	0	0	0	0	1	0	1	0	0	3	0	2	0	0	0	1
ERV316A3_6q26c	0	0	0	2	0	1	0	0	0	0	0	0	0	0	0	0	0	0	0	0	0	0	0	0	0	0	2	0	0	0	0	13	0	0	0	0	0	0	0	1	0	0	0	0	0	0	1	1	3
ERV316A3_7p12.1a	0	0	0	0	0	2	0	1	2	1	0	0	0	0	2	0	1	1	3	3	1	0	1	1	0	0	0	0	2	1	0	16	0	0	0	0	1	0	2	0	3	0	1	0	1	7	3	0	0
ERV316A3_7p12.1b	0	0	0	0	0	0	0	0	0	0	0	0	0	0	0	0	0	0	0	0	0	0	0	0	0	0	0	0	0	0	0	10	0	0	0	0	0	0	0	0	0	0	0	0	0	0	0	0	0
ERV316A3_7p12.1c	0	0	0	0	3	0	0	0	0	0	0	0	0	0	0	0	0	0	0	0	0	0	0	0	0	0	0	0	0	0	0	7	0	0	0	0	0	0	0	0	0	0	0	0	0	0	0	0	0
ERV316A3_7p12.1d	0	0	0	0	0	0	0	1	0	0	0	0	0	1	0	0	0	0	0	0	0	0	0	0	0	0	0	0	0	0	0	5	2	0	0	0	0	0	0	0	0	0	0	0	0	0	0	10	0
ERV316A3_7p12.1e	0	0	0	0	0	0	0	0	0	0	0	0	0	0	0	0	0	0	0	0	0	0	1	0	0	0	0	0	0	0	0	10	0	0	0	0	0	0	0	0	0	0	0	0	0	0	0	1	0
ERV316A3_7p12.2a	0	0	0	0	0	0	0	0	0	0	0	0	0	0	0	0	0	0	0	0	0	0	0	0	0	0	0	0	0	0	0	6	0	0	0	0	0	0	0	0	0	0	0	0	0	0	0	0	0
ERV316A3_7p12.2b	0	0	0	0	0	0	0	0	0	0	0	0	0	0	0	0	0	0	0	0	0	0	0	0	0	0	0	0	0	0	0	5	0	0	0	0	0	0	0	0	0	0	0	0	0	0	0	0	0
ERV316A3_7p13a	1	13	1	7	9	1	0	0	1	12	1	3	2	18	2	0	14	16	4	0	3	3	14	11	2	3	5	1	10	10	3	33	12	1	3	2	3	0	11	1	3	4	11	4	6	1	0	19	5
ERV316A3_7p13b	0	0	0	0	0	0	0	0	0	0	0	0	0	0	0	0	0	0	0	0	0	0	0	0	0	0	0	0	0	0	0	2	0	0	0	0	0	0	0	0	0	0	0	0	0	0	0	0	0
ERV316A3_7p14.1a	0	0	0	0	0	0	0	0	0	0	0	0	0	0	0	0	0	0	0	0	0	0	0	0	0	0	0	0	0	0	0	6	0	0	0	0	0	0	0	0	0	0	0	0	0	0	0	0	0
ERV316A3_7p14.1b	0	0	0	0	1	0	0	0	0	0	0	0	0	0	0	0	0	0	0	3	0	0	1	0	0	2	0	0	1	2	0	39	0	0	0	0	0	0	0	0	0	0	0	0	0	0	0	0	0
ERV316A3_7p14.3	0	0	0	0	0	0	0	0	0	0	0	0	0	1	0	0	0	0	0	0	0	0	1	0	0	0	0	0	0	1	0	26	0	0	0	0	0	0	0	0	0	0	0	4	0	0	0	0	0
ERV316A3_7p15.3a	0	4	1	0	1	0	0	0	0	5	0	3	0	3	0	0	2	0	0	0	0	0	0	0	1	0	1	1	0	0	2	32	1	0	0	0	0	0	0	2	0	0	1	0	0	0	0	0	0
ERV316A3_7p15.3b	2	2	0	0	0	0	0	0	0	0	0	0	0	1	0	0	0	0	0	0	0	0	0	2	0	0	0	0	0	0	0	31	0	0	0	0	0	0	0	0	2	0	0	0	0	0	0	0	0
ERV316A3_7p15.3c	0	0	0	0	0	0	0	0	0	0	0	0	0	1	0	0	0	0	0	0	0	0	0	0	0	0	0	0	0	0	0	12	0	0	0	0	0	0	0	0	0	0	0	0	0	0	0	1	0
ERV316A3_7p21.2a	0	0	0	0	0	0	0	1	0	0	0	0	0	0	0	0	0	0	0	1	0	10	0	0	0	0	0	0	0	0	1	12	1	0	0	0	0	0	0	0	0	0	0	0	0	0	0	0	0
ERV316A3_7p21.2b	0	0	0	0	0	0	0	1	0	0	0	0	0	0	0	0	0	0	0	0	0	8	1	0	0	0	0	0	0	0	0	4	2	0	0	0	0	0	0	0	0	0	0	0	0	0	0	0	0
ERV316A3_7p21.2c	0	0	0	0	0	0	0	0	0	0	0	0	0	0	0	0	0	0	0	0	0	0	1	1	0	0	0	0	0	0	1	8	0	0	0	0	0	0	0	0	0	0	0	0	0	0	0	0	0
ERV316A3_7p21.2d	3	0	0	0	0	0	0	0	0	0	0	0	0	1	0	0	0	0	0	0	0	0	0	0	0	0	0	0	0	0	0	28	2	0	0	0	0	0	0	0	0	0	0	0	0	0	0	0	0
ERV316A3_7p21.3a	0	0	0	0	0	0	0	1	0	0	0	0	0	0	0	0	0	0	0	0	0	0	0	0	0	0	0	0	0	0	0	3	0	0	0	0	0	0	0	0	0	1	0	0	0	0	0	0	0
ERV316A3_7p21.3b	0	0	0	0	0	0	0	2	0	0	0	0	0	0	0	0	0	0	0	0	0	0	1	0	0	0	0	0	0	0	0	13	0	0	0	0	0	0	0	0	0	0	0	0	0	0	0	1	0
ERV316A3_7p21.3c	0	0	1	0	0	0	0	0	0	0	0	0	0	0	0	0	0	0	0	0	0	0	0	0	0	0	0	0	2	0	0	14	0	0	0	0	0	0	0	0	0	0	0	0	0	0	0	0	0
ERV316A3_7p22.3	3	3	0	4	8	3	3	2	1	5	2	4	4	16	0	5	8	4	2	0	5	3	6	5	2	5	5	20	3	6	6	25	7	13	3	1	0	1	12	2	1	4	0	3	5	8	4	23	0
ERV316A3_7q11.22	0	0	0	0	0	0	0	0	0	0	0	0	0	0	0	0	0	0	0	1	0	0	0	0	0	0	0	0	0	0	0	15	0	0	0	0	0	0	0	0	0	0	0	0	0	0	0	0	0
ERV316A3_7q21.11a	0	0	0	0	0	0	0	0	0	0	0	0	0	0	0	0	0	0	0	0	0	0	2	0	0	0	0	0	0	0	0	20	0	0	0	0	0	0	0	0	0	0	0	0	0	0	0	0	0
ERV316A3_7q21.11b	0	0	0	0	0	0	2	0	0	0	0	0	0	0	0	0	0	0	0	0	0	0	0	0	0	0	0	0	0	0	0	39	0	0	1	0	0	0	0	0	0	0	0	0	0	0	0	0	0
ERV316A3_7q21.11c	0	0	0	0	0	0	0	0	0	0	0	0	0	0	0	0	0	0	0	0	0	0	2	0	0	0	0	0	0	0	0	7	0	0	0	0	0	0	0	0	0	0	0	0	0	0	0	0	0
ERV316A3_7q21.11d	0	0	0	0	0	0	0	0	0	0	0	0	0	1	0	0	0	0	0	0	0	0	0	0	0	0	0	0	0	0	0	54	0	1	0	0	0	0	0	0	0	0	2	0	0	0	0	0	0
ERV316A3_7q21.11e	0	0	0	0	0	0	0	0	0	0	0	0	0	0	0	0	0	0	0	0	0	1	0	0	0	0	0	0	0	0	0	16	0	0	0	0	0	0	0	0	15	0	0	0	0	0	0	0	0
ERV316A3_7q21.11f	0	0	0	0	1	1	0	1	0	1	0	0	0	7	0	1	2	0	0	2	2	1	0	0	0	0	0	0	1	0	0	15	2	0	0	0	0	0	3	0	0	0	1	0	0	0	0	0	0
ERV316A3_7q21.11g	0	0	0	0	0	0	0	0	0	0	0	0	0	0	0	0	0	0	0	0	0	0	1	0	0	0	0	0	0	0	0	33	0	0	0	0	0	0	0	0	0	0	0	0	0	0	0	0	0
ERV316A3_7q21.11h	0	0	0	0	0	0	0	0	0	0	0	0	0	4	0	0	0	0	0	0	0	0	1	1	0	0	1	0	0	0	0	28	1	0	0	0	0	0	0	0	0	0	0	0	0	0	0	0	0
ERV316A3_7q21.11i	0	0	0	0	0	1	0	0	0	0	0	0	0	0	0	0	0	0	0	0	0	0	2	0	0	0	0	0	0	0	0	30	0	0	0	0	0	0	0	0	0	0	0	0	0	0	0	0	0
ERV316A3_7q21.11j	0	0	0	0	0	0	0	0	0	0	0	0	0	0	0	0	0	0	0	0	0	0	0	0	0	0	0	0	0	0	0	10	0	0	0	0	0	0	0	0	0	0	0	0	0	0	0	0	0
ERV316A3_7q21.11k	0	0	0	0	0	0	0	0	0	0	0	0	0	0	0	0	0	0	0	0	0	0	0	0	0	0	0	0	0	0	0	32	1	0	0	0	0	0	0	0	0	0	0	0	0	0	0	0	0
ERV316A3_7q21.12a	0	0	0	0	0	0	0	0	0	0	0	0	0	0	0	0	0	0	0	0	0	0	0	0	0	0	0	0	0	0	0	16	0	0	1	0	0	0	0	0	0	0	0	0	0	0	0	0	0
ERV316A3_7q21.12b	0	0	0	0	50	1	0	0	0	0	0	0	0	0	0	0	0	0	1	1	0	0	0	0	0	0	0	0	1	0	6	36	2	0	0	0	0	1	0	0	0	1	0	0	1	0	0	0	0
ERV316A3_7q21.13	4	0	5	10	6	8	30	8	0	0	4	0	9	0	2	1	0	4	3	5	6	7	5	4	5	8	2	7	6	2	2	24	2	4	6	0	3	12	4	4	7	5	4	2	2	1	4	7	6
ERV316A3_7q21.3a	2	0	0	0	9	0	0	0	0	2	0	0	0	1	0	0	0	0	0	4	0	0	2	0	0	0	0	1	3	0	5	27	1	0	0	0	0	0	0	0	0	3	2	0	1	7	0	112	1
ERV316A3_7q21.3b	4	0	0	1	2	0	1	1	0	0	0	1	0	5	1	1	0	0	0	0	1	0	4	0	3	2	0	0	1	1	7	29	2	0	2	2	0	1	0	3	3	1	2	0	3	1	1	9	4
ERV316A3_7q21.3c	0	0	2	3	0	0	0	2	0	0	0	0	0	0	0	0	1	0	1	1	0	0	2	1	0	0	0	1	3	0	1	30	1	0	0	0	0	0	0	0	0	0	0	0	0	0	1	2	1
ERV316A3_7q22.2a	0	0	0	0	0	0	0	0	0	0	0	0	0	0	0	0	0	0	0	0	0	0	1	0	0	0	0	0	0	0	0	17	0	0	0	0	0	0	0	0	0	0	0	0	0	0	0	0	0
ERV316A3_7q22.2b	0	0	0	0	0	0	0	0	0	0	0	0	0	0	0	0	0	0	0	0	0	0	0	0	0	0	0	0	0	0	0	13	0	0	0	0	0	0	0	0	0	0	0	0	0	0	0	0	0
ERV316A3_7q22.3	0	0	0	0	0	0	2	0	0	0	0	0	0	0	0	0	0	0	0	2	0	0	0	0	0	0	0	0	1	0	0	13	0	0	0	0	0	0	0	0	0	0	0	0	0	0	0	3	1
ERV316A3_7q31.1a	0	0	0	0	0	0	0	0	0	0	0	0	0	0	0	0	1	0	0	0	0	0	0	0	0	0	0	0	0	0	0	24	0	0	0	0	0	0	0	0	0	0	0	0	0	0	0	0	0
ERV316A3_7q31.1b	0	0	0	0	7	0	0	0	0	0	0	0	0	0	0	0	1	0	0	0	0	0	0	0	0	0	0	0	0	0	0	18	0	0	0	0	0	0	0	0	0	0	0	0	0	0	0	0	0
ERV316A3_7q31.1c	803	756	631	706	964	1376	1431	1118	743	665	576	930	1767	1088	1380	299	605	1370	609	585	751	1026	746	740	946	1170	941	1763	1562	1038	682	872	947	952	1051	1102	322	837	1203	745	669	543	817	1230	773	762	1798	1387	1559
ERV316A3_7q31.1d	0	0	0	0	0	0	0	0	0	1	0	0	0	0	0	0	0	0	0	0	0	0	1	0	0	0	0	0	0	0	0	20	0	0	0	0	1	0	0	0	0	0	0	0	0	0	0	0	0
ERV316A3_7q31.1e	0	0	0	0	0	0	1	0	0	0	0	0	0	0	0	0	0	0	0	1	0	0	4	0	0	1	0	0	0	0	0	42	0	0	0	2	0	0	0	0	0	2	0	0	0	0	1	0	0
ERV316A3_7q31.1f	0	0	0	1	2	1	0	5	0	0	0	0	0	0	0	0	0	0	0	1	0	0	3	2	0	0	0	3	1	0	0	38	0	0	0	0	0	0	0	0	0	0	0	0	0	0	0	2	0
ERV316A3_7q31.2	0	0	0	0	0	0	0	0	0	0	0	0	0	0	0	0	0	0	0	0	0	0	0	0	0	0	0	0	0	0	0	37	0	0	0	0	0	0	0	0	0	0	0	0	0	0	0	0	0
ERV316A3_7q31.31a	0	0	0	0	0	0	0	0	0	0	0	0	0	1	0	0	0	0	0	0	0	0	0	0	0	0	0	0	0	0	0	29	0	0	0	0	0	0	0	0	0	0	0	0	0	0	0	0	0
ERV316A3_7q31.31b	0	0	0	1	0	0	0	0	0	0	0	0	0	0	0	0	0	0	0	0	0	0	0	0	0	0	1	0	1	0	0	36	0	0	0	0	0	0	0	0	0	0	0	0	0	0	1	0	0
ERV316A3_7q31.31c	0	0	0	0	0	0	0	0	0	0	0	0	0	1	0	0	0	0	0	0	0	0	0	0	0	0	0	0	0	0	1	3	0	0	0	0	0	0	0	0	0	0	0	0	0	0	0	0	0
ERV316A3_7q31.31d	0	0	0	0	0	0	0	0	0	0	0	0	0	0	0	0	0	0	0	0	0	0	2	0	0	0	0	0	0	0	0	19	0	0	0	0	0	0	0	0	0	0	0	0	0	0	0	0	0
ERV316A3_7q31.31e	0	0	0	0	0	0	0	0	0	0	0	0	0	0	0	0	0	0	0	0	0	0	2	1	0	0	0	0	0	0	0	61	0	0	0	0	0	0	0	0	0	0	0	0	0	0	0	0	0
ERV316A3_7q31.32a	0	0	0	0	0	0	0	0	0	0	0	0	0	0	0	0	0	0	0	0	0	0	2	0	0	0	0	0	2	0	0	5	0	0	0	0	0	0	0	0	0	0	0	0	0	0	1	0	0
ERV316A3_7q31.32b	0	0	0	0	0	0	0	0	0	0	0	0	0	0	0	0	0	0	0	0	0	0	1	0	0	0	0	0	0	0	0	20	0	0	0	0	0	0	0	0	0	0	0	0	0	0	0	0	0
ERV316A3_7q31.32c	0	0	0	0	0	0	0	0	0	1	0	0	0	0	0	0	0	0	0	0	0	0	0	0	2	0	0	0	0	0	0	35	0	0	0	0	0	0	0	1	0	1	0	0	1	0	0	0	0
ERV316A3_7q31.33a	0	0	0	0	0	0	0	0	0	0	0	0	0	0	0	0	0	0	0	0	0	0	0	0	0	0	0	0	0	0	0	2	0	0	0	0	0	0	0	0	0	0	0	0	0	0	0	0	0
ERV316A3_7q31.33b	0	0	0	0	0	0	0	0	0	0	0	0	0	0	0	0	0	0	0	0	0	0	2	0	0	0	0	0	0	0	0	8	0	0	0	0	0	0	0	0	0	0	0	0	0	0	0	0	0
ERV316A3_7q31.33c	0	0	0	0	0	0	0	0	0	0	0	0	0	0	0	0	0	0	0	0	0	0	0	0	0	0	0	0	0	0	0	8	0	0	0	0	0	0	0	0	0	0	0	0	0	0	0	0	0
ERV316A3_7q32.1	0	0	0	0	0	0	0	0	0	0	0	0	0	1	0	0	0	1	0	0	0	0	2	1	0	1	0	0	0	0	0	15	0	0	0	0	0	0	0	0	0	0	0	0	0	0	1	0	0
ERV316A3_7q33a	0	0	0	0	0	0	4	0	1	0	0	0	1	0	1	0	2	0	0	0	0	2	0	0	0	0	14	0	3	2	0	11	0	0	0	0	0	0	1	0	0	0	0	1	1	0	0	5	0
ERV316A3_7q33b	0	1	0	0	0	0	0	0	0	0	0	0	0	0	1	0	0	0	0	0	0	0	0	0	0	0	0	0	1	1	0	9	0	0	0	0	0	0	0	0	0	0	0	0	0	0	0	0	0
ERV316A3_7q33c	0	2	2	0	0	2	0	0	0	1	0	0	0	2	1	0	2	0	0	1	1	2	2	0	0	0	0	0	0	4	0	12	0	0	0	0	0	0	0	0	0	0	0	0	0	0	3	0	0
ERV316A3_7q33d	0	0	0	0	0	0	0	0	0	0	0	0	0	0	0	0	0	0	0	0	0	0	3	0	0	0	1	0	2	1	0	34	0	0	0	0	1	0	0	0	1	0	0	0	0	1	0	0	0
ERV316A3_7q34a	0	0	0	0	0	0	0	0	0	0	0	0	0	0	0	0	0	0	0	0	0	0	0	0	0	0	0	0	0	0	0	8	0	0	0	0	0	0	0	0	0	0	0	0	0	0	0	0	0
ERV316A3_7q34b	0	0	0	0	0	0	0	0	0	0	0	0	0	0	0	0	0	0	0	0	0	0	0	2	0	0	0	0	0	1	0	35	0	0	0	0	0	0	0	0	1	0	0	0	0	0	0	0	0
ERV316A3_7q34c	0	0	0	0	0	0	0	0	0	0	0	0	0	0	0	0	0	0	0	0	0	0	0	0	0	0	0	0	0	0	0	8	0	0	0	0	0	0	0	0	0	0	0	0	0	0	0	0	0
ERV316A3_7q34d	0	0	0	0	0	0	0	0	0	0	0	0	0	1	0	0	1	0	0	0	0	0	1	0	0	0	0	0	0	0	1	18	0	0	0	0	0	0	0	0	0	0	0	0	1	1	0	2	0
ERV316A3_7q35a	0	0	0	0	0	0	0	0	0	0	0	0	0	0	0	0	0	0	0	0	0	0	0	0	0	0	0	0	0	0	0	21	0	0	0	0	0	0	0	0	0	0	0	0	0	0	0	0	0
ERV316A3_7q35b	0	0	0	1	0	0	0	0	0	0	0	0	0	0	0	0	0	0	0	0	0	0	0	0	0	0	0	0	0	0	0	15	0	0	0	0	0	0	0	0	0	0	0	0	0	0	0	0	0
ERV316A3_7q35c	0	0	0	0	0	0	0	0	0	0	0	0	0	0	0	0	0	0	0	0	0	0	2	0	0	0	0	0	0	0	0	9	0	0	0	0	0	0	0	0	0	0	0	0	0	0	0	0	0
ERV316A3_7q36.1a	0	3	1	0	18	3	0	2	1	2	0	2	0	8	0	1	1	2	3	4	3	1	3	1	0	2	0	0	10	8	17	11	16	2	3	0	2	2	3	4	2	0	2	0	0	1	3	10	0
ERV316A3_7q36.1b	0	0	0	0	0	0	0	0	0	0	0	0	0	0	0	0	0	0	0	0	0	0	2	0	0	0	0	0	2	0	0	5	0	0	0	0	0	0	0	0	1	0	0	0	0	0	0	0	0
ERV316A3_7q36.1c	0	0	0	0	0	0	0	0	0	0	0	0	0	0	0	0	0	0	0	0	0	0	0	0	0	0	0	0	0	0	0	19	0	0	0	0	0	0	0	0	0	0	0	0	0	0	0	0	0
ERV316A3_7q36.2a	0	0	0	0	0	0	1	0	0	0	0	0	0	0	0	0	0	0	0	0	0	0	0	0	0	0	0	0	0	0	0	17	0	0	0	0	0	0	0	0	0	0	0	0	0	0	0	0	0
ERV316A3_7q36.2b	0	0	0	0	0	0	0	0	0	0	0	0	0	0	0	0	0	0	0	0	0	0	0	0	0	0	0	0	0	0	0	23	0	0	0	0	0	0	0	0	0	0	0	0	0	0	0	0	0
ERV316A3_7q36.2c	0	0	0	0	0	0	0	0	0	0	0	0	0	0	0	0	0	0	0	0	0	0	0	0	0	0	0	0	0	1	0	21	0	0	0	2	0	1	0	0	0	0	0	0	0	0	0	0	2
ERV316A3_7q36.2d	0	0	0	0	0	0	0	0	0	0	0	0	0	0	0	0	0	0	0	0	0	0	0	0	0	0	0	0	0	0	0	11	0	0	0	0	0	0	0	0	0	0	0	0	0	0	0	0	0
ERV316A3_7q36.2e	1	0	0	0	0	0	0	0	0	0	0	0	0	0	0	0	0	0	0	2	0	0	1	0	0	0	0	0	0	0	0	37	0	0	0	0	0	0	0	0	0	0	0	0	0	0	0	1	0
ERV316A3_7q36.3a	0	0	0	0	0	0	0	0	0	0	0	0	0	0	0	0	0	0	0	0	0	0	0	1	0	0	0	0	0	0	1	9	0	0	0	0	0	0	0	0	0	0	0	0	0	0	0	0	0
ERV316A3_7q36.3b	0	0	0	0	0	0	0	0	0	0	0	0	0	0	0	0	0	0	1	0	0	0	0	0	0	0	0	0	0	0	0	39	0	0	0	0	0	0	0	0	0	0	0	0	0	0	0	1	0
ERV316A3_7q36.3c	0	0	0	0	0	0	0	0	0	0	0	0	0	0	0	0	0	0	0	0	0	0	2	0	0	0	0	0	0	0	0	22	0	0	0	0	0	0	0	0	0	1	0	0	0	0	0	0	1
ERV316A3_8p11.21	0	0	0	0	0	0	0	0	0	0	0	0	0	0	0	0	0	0	0	0	0	0	0	0	0	0	0	0	0	0	0	7	0	0	0	0	0	0	0	0	0	0	0	0	0	0	1	0	0
ERV316A3_8p11.22a	0	0	0	0	0	0	0	0	0	0	0	0	0	0	0	0	0	0	0	0	0	0	0	0	0	0	0	0	0	0	0	15	1	0	0	0	0	0	0	0	0	0	0	0	0	0	0	0	0
ERV316A3_8p11.22b	0	0	0	0	0	0	0	1	0	0	0	0	0	0	0	0	0	0	0	0	0	0	3	0	0	0	0	0	0	0	0	20	0	0	0	0	0	0	0	0	0	0	0	0	0	0	0	0	0
ERV316A3_8p11.22c	0	0	0	0	0	0	0	0	0	0	0	0	0	0	0	0	0	0	0	0	0	0	0	0	0	0	0	0	0	0	0	14	0	0	0	0	0	0	0	0	0	0	0	0	0	0	0	0	0
ERV316A3_8p11.23a	0	0	0	0	0	0	0	0	0	0	0	0	0	0	0	0	0	0	0	0	0	0	0	0	0	0	0	0	0	0	0	23	0	0	0	0	0	0	0	0	0	0	0	0	0	0	0	1	0
ERV316A3_8p11.23b	2	0	0	0	0	0	0	0	0	0	0	0	0	1	0	0	0	0	0	0	0	0	0	0	0	0	0	0	0	0	0	7	0	0	0	0	0	0	0	0	1	0	0	0	0	0	0	1	0
ERV316A3_8p12a	0	0	0	0	0	0	0	0	0	0	0	0	0	0	0	0	0	0	0	0	0	0	0	0	0	0	1	0	0	0	0	16	0	0	0	0	0	0	0	0	0	0	0	0	0	0	0	0	0
ERV316A3_8p12b	0	0	0	0	0	0	0	0	0	0	0	0	0	0	0	0	0	0	0	0	0	0	0	0	0	0	0	0	0	0	0	21	0	0	0	0	0	0	0	0	0	0	0	0	0	0	0	0	0
ERV316A3_8p12c	0	0	0	0	0	0	0	0	0	0	0	0	0	0	0	0	0	0	0	0	0	0	0	0	0	0	0	0	0	1	0	17	1	0	0	0	0	0	0	0	0	0	0	0	0	0	0	2	0
ERV316A3_8p12d	0	0	0	0	0	0	0	0	0	0	0	0	0	0	0	0	0	0	0	0	0	0	0	0	0	0	0	0	0	0	0	16	0	0	0	0	0	0	0	0	0	0	0	0	0	0	0	0	0
ERV316A3_8p12e	0	0	0	0	0	0	0	0	0	0	0	0	0	0	0	0	0	0	0	0	0	0	2	0	0	0	0	0	0	0	0	40	2	0	0	0	0	0	0	0	0	0	0	0	0	0	0	0	0
ERV316A3_8p12f	0	0	0	0	0	0	0	0	0	0	0	0	0	0	0	0	0	0	0	0	0	0	0	0	0	0	0	0	0	0	0	20	0	0	0	0	0	0	0	0	0	0	0	0	0	0	0	0	0
ERV316A3_8p12g	1	1	0	0	1	0	0	1	0	1	0	0	0	1	2	0	0	0	0	0	0	0	2	0	1	0	0	2	0	2	1	14	1	1	0	0	0	1	0	0	0	1	2	0	0	0	0	0	0
ERV316A3_8p12h	0	0	0	0	0	0	0	1	0	0	0	0	0	0	0	0	0	0	0	0	0	0	0	0	0	0	0	0	0	0	0	28	0	0	0	0	0	0	0	0	0	0	0	0	0	0	0	0	0
ERV316A3_8p12i	0	1	0	4	10	0	0	6	0	0	0	0	0	15	0	0	0	0	0	0	0	0	0	0	0	0	0	0	5	0	0	9	0	0	0	0	0	0	0	0	0	0	0	0	0	0	1	0	0
ERV316A3_8p21.1	0	0	0	0	0	0	0	0	0	0	0	0	0	0	0	0	0	0	0	0	0	0	0	0	0	0	0	0	0	0	0	6	0	0	0	0	0	0	1	0	0	2	1	0	0	0	0	0	0
ERV316A3_8p21.2a	0	0	0	0	0	0	0	1	0	0	0	1	0	1	1	0	0	0	0	0	0	0	0	0	0	0	0	0	0	0	0	10	0	0	0	0	0	0	0	0	0	0	0	0	0	0	0	3	0
ERV316A3_8p21.2b	0	0	0	1	0	0	0	0	0	0	0	0	0	0	0	0	0	0	0	0	0	0	0	0	0	0	0	0	0	0	0	68	0	0	0	0	0	0	0	0	3	0	0	17	0	1	0	0	7
ERV316A3_8p21.3a	0	0	0	0	0	0	0	0	0	0	0	0	0	0	0	0	0	0	0	0	0	0	0	0	0	0	0	0	0	0	0	4	0	0	0	0	0	0	0	0	0	0	0	0	0	0	0	0	0
ERV316A3_8p21.3b	0	0	0	0	0	0	0	0	0	0	0	0	0	0	0	0	0	0	0	0	0	0	1	0	0	0	0	0	0	0	0	8	0	0	0	0	0	0	0	0	0	0	0	0	0	0	0	0	0
ERV316A3_8p21.3c	0	0	0	0	0	0	0	0	0	0	0	0	0	0	0	0	0	0	0	0	0	0	2	0	0	0	0	0	0	0	0	29	0	0	0	0	0	0	0	0	0	0	0	0	0	0	0	0	0
ERV316A3_8p21.3d	0	0	0	1	0	0	0	0	0	0	0	0	0	0	0	0	0	0	0	0	0	0	0	0	0	0	1	0	0	0	0	42	0	0	0	0	0	0	0	0	0	0	1	0	0	0	0	0	1
ERV316A3_8p21.3e	0	0	0	0	0	0	0	0	0	0	0	0	0	0	1	0	0	0	0	0	0	0	1	0	0	0	0	0	0	0	0	44	0	0	0	0	0	0	0	0	0	0	0	0	0	0	0	0	0
ERV316A3_8p21.3f	0	0	0	0	0	0	0	0	0	0	0	0	0	0	0	0	0	0	0	0	0	0	0	0	0	0	0	0	0	0	0	24	0	0	0	0	0	0	0	0	0	0	0	0	1	0	0	0	0
ERV316A3_8p21.3g	0	0	0	0	1	0	1	0	0	0	0	0	0	0	0	0	0	0	0	0	0	0	0	0	0	0	0	0	0	0	0	59	0	0	0	0	0	0	0	0	0	0	0	0	0	0	0	0	0
ERV316A3_8p22a	0	0	0	0	1	0	0	0	0	0	0	0	0	0	0	0	0	0	0	0	0	0	0	0	0	0	0	0	0	0	0	30	0	0	0	0	0	0	0	0	0	0	0	0	0	0	0	0	0
ERV316A3_8p22b	0	0	0	0	0	0	0	0	0	0	0	0	0	0	0	0	0	0	0	0	0	0	0	0	0	0	0	0	0	0	0	9	0	0	0	0	0	0	0	0	0	0	0	0	0	0	0	0	0
ERV316A3_8p22c	0	0	0	0	0	0	0	1	1	0	0	0	0	0	0	0	4	0	5	4	0	0	1	0	0	0	2	0	10	1	0	21	0	0	0	0	0	0	0	1	0	0	0	2	4	1	0	0	0
ERV316A3_8p22d	0	0	0	0	0	0	0	0	0	0	0	0	0	0	0	0	0	0	0	0	0	0	0	0	0	0	0	0	0	0	0	2	0	0	0	0	0	0	0	0	0	0	0	0	0	0	0	0	0
ERV316A3_8p22e	0	0	0	0	0	0	0	0	0	0	0	0	0	0	0	0	0	0	0	0	0	0	0	0	0	0	0	0	0	0	0	17	0	0	0	0	0	0	0	0	0	0	0	0	0	0	0	0	0
ERV316A3_8p22f	0	0	0	0	3	1	0	0	0	0	0	1	0	0	0	0	0	0	0	0	2	0	0	1	0	0	1	0	0	3	0	15	0	0	0	0	0	2	3	0	2	0	0	0	0	0	0	1	0
ERV316A3_8p22g	0	0	0	0	0	0	0	0	0	0	0	0	0	0	0	0	0	0	0	0	0	0	0	0	0	0	0	0	0	1	0	17	0	0	0	0	0	0	0	0	0	0	0	0	0	0	0	0	0
ERV316A3_8p23.1a	0	0	0	0	0	0	0	0	0	0	0	0	0	0	0	0	0	0	0	0	0	0	0	0	0	0	0	0	0	0	0	10	0	0	0	0	0	0	0	0	0	0	0	0	0	0	0	0	0
ERV316A3_8p23.1b	0	0	0	0	0	0	0	0	0	0	0	0	0	0	0	0	0	0	0	0	0	0	1	0	0	0	0	0	0	0	0	26	0	0	0	0	0	0	0	0	0	0	0	0	0	0	0	0	0
ERV316A3_8p23.1c	0	0	0	0	0	0	0	0	0	0	0	0	0	0	0	0	0	0	0	0	0	0	0	0	0	0	0	0	0	0	0	15	0	0	0	0	0	0	0	0	0	0	0	0	0	0	0	0	0
ERV316A3_8p23.1d	0	0	0	0	0	0	0	0	0	1	0	0	0	1	0	0	0	0	0	0	0	0	0	0	0	0	0	0	0	0	0	13	0	0	0	0	0	0	0	0	0	0	0	0	0	0	0	0	0
ERV316A3_8p23.2	0	0	0	0	2	0	0	0	0	0	0	0	0	0	0	0	0	0	0	0	0	0	0	0	0	0	0	0	0	1	0	8	1	0	0	0	0	0	0	0	0	0	1	0	0	0	0	0	0
ERV316A3_8q11.21a	0	0	0	1	0	0	0	0	0	0	0	0	0	0	0	0	0	0	0	0	0	0	1	0	0	0	0	0	1	2	3	17	0	0	0	0	0	0	0	0	0	0	0	0	0	0	0	0	0
ERV316A3_8q11.21b	0	0	0	0	0	0	0	0	0	0	0	0	0	0	0	0	0	0	1	0	0	0	1	0	0	0	0	0	0	0	1	67	0	0	0	0	0	0	0	0	0	0	0	0	0	0	0	0	0
ERV316A3_8q11.21c	0	0	0	0	0	0	0	0	0	0	0	0	0	0	0	0	0	0	0	0	0	0	1	0	0	0	0	0	0	0	0	18	0	0	0	0	0	0	0	0	0	0	0	0	0	0	0	0	0
ERV316A3_8q11.21d	0	0	0	0	0	0	0	0	0	0	0	0	0	0	0	0	0	0	0	0	0	0	0	0	0	0	0	0	0	0	0	18	0	0	0	0	0	0	0	0	0	1	0	0	0	0	0	0	0
ERV316A3_8q11.23a	0	0	0	0	0	0	0	0	0	0	0	0	0	0	0	0	0	0	0	0	0	0	2	0	0	0	0	0	0	0	2	30	0	0	0	0	0	0	0	0	0	0	0	0	0	0	0	0	0
ERV316A3_8q11.23b	0	1	0	0	0	0	1	0	0	2	0	0	0	0	1	0	0	0	3	0	0	0	3	4	0	0	0	0	0	1	3	25	1	0	0	0	0	0	0	0	1	5	5	1	0	1	0	0	0
ERV316A3_8q11.23c	0	0	0	0	0	0	0	0	0	0	0	0	0	0	0	0	0	0	0	0	0	1	1	0	0	0	0	0	0	1	0	13	0	0	0	0	0	0	0	0	0	0	0	0	0	0	0	0	0
ERV316A3_8q12.1a	0	0	0	0	0	0	0	0	0	0	0	0	0	0	0	0	0	0	0	0	0	0	2	0	0	0	0	0	0	0	0	59	0	0	0	0	0	0	0	0	0	0	0	0	0	0	0	0	0
ERV316A3_8q12.1b	0	0	0	0	0	0	0	0	0	0	0	0	0	0	0	0	0	0	0	0	0	0	1	0	0	0	0	0	0	0	0	7	0	0	0	0	0	0	0	0	0	0	0	0	0	0	0	0	0
ERV316A3_8q12.1c	0	0	0	0	0	0	0	0	0	0	0	0	0	0	0	0	0	0	0	0	0	0	1	0	0	0	0	0	0	0	0	4	0	0	0	0	0	0	0	0	0	0	0	0	0	0	0	0	0
ERV316A3_8q12.2	0	0	0	0	2	0	0	0	0	0	0	0	0	0	0	0	0	0	0	0	0	0	1	0	0	0	1	0	1	0	0	46	2	0	0	0	0	0	0	0	0	0	0	0	0	0	0	0	0
ERV316A3_8q12.3a	0	0	0	0	0	0	0	0	0	0	0	0	0	0	0	0	0	0	0	0	0	0	0	0	0	0	0	0	0	0	0	14	0	0	0	0	0	0	0	0	0	0	0	0	0	0	0	0	0
ERV316A3_8q12.3b	0	0	0	0	0	0	0	0	0	0	0	0	0	0	0	0	0	0	0	0	0	0	0	0	0	0	0	0	0	1	0	21	0	0	0	0	0	0	0	0	0	0	0	0	0	0	0	0	0
ERV316A3_8q12.3c	0	0	0	0	0	0	0	0	0	0	0	0	0	0	0	0	0	0	0	0	0	0	0	0	0	0	0	0	0	0	0	7	0	0	0	0	0	0	0	0	0	0	0	0	0	0	0	0	0
ERV316A3_8q13.1a	0	0	0	0	0	0	0	0	0	0	0	0	0	0	0	0	0	0	0	0	0	0	0	0	0	0	0	0	0	0	0	12	0	0	0	0	0	0	0	0	0	0	0	0	0	0	0	0	0
ERV316A3_8q13.1b	0	1	1	1	1	0	2	0	0	0	1	0	7	0	1	2	0	0	1	2	0	0	0	5	0	6	0	0	0	7	0	40	1	1	1	0	0	1	0	1	0	1	0	0	1	1	0	2	1
ERV316A3_8q13.2a	2	0	0	0	1	0	0	0	0	0	0	0	0	1	1	0	1	0	1	0	0	0	0	0	0	0	0	0	2	1	0	12	1	0	0	0	0	0	0	1	2	1	1	0	0	0	1	0	5
ERV316A3_8q13.2b	0	0	0	0	1	0	0	0	1	0	0	0	0	2	0	0	0	0	0	1	0	0	1	1	0	0	3	0	0	1	7	13	0	0	0	0	2	0	0	1	0	0	2	1	3	0	0	1	0
ERV316A3_8q13.2c	0	0	0	0	1	0	0	0	0	0	0	0	0	0	0	0	1	0	0	0	0	0	0	0	0	0	1	0	0	0	0	22	0	1	1	0	1	1	0	0	0	0	0	0	0	0	0	0	0
ERV316A3_8q13.3a	196	330	237	229	1220	1391	1532	921	451	876	237	666	1531	668	1103	386	467	1522	190	267	416	660	247	286	168	231	266	283	1061	298	506	261	480	438	396	750	272	885	385	206	289	141	294	441	243	359	2100	1200	293
ERV316A3_8q13.3b	0	6	7	0	35	2	0	0	0	1	0	0	0	0	3	3	6	0	0	3	22	3	0	0	2	0	1	0	1	0	9	11	4	0	0	0	1	2	1	0	0	0	0	1	0	0	0	1	1
ERV316A3_8q21.11a	0	0	0	0	4	0	0	0	0	0	0	2	0	4	0	0	0	1	0	0	0	0	0	0	0	0	0	0	0	2	3	10	3	0	0	0	0	0	0	0	1	0	0	0	1	0	0	1	0
ERV316A3_8q21.11b	0	0	0	0	0	0	0	0	0	0	0	0	0	0	0	0	0	0	0	0	0	0	0	0	0	0	0	0	0	0	0	10	0	0	0	0	0	0	0	0	0	0	0	0	0	0	0	0	0
ERV316A3_8q21.11c	0	0	0	0	0	0	0	0	0	0	0	0	0	0	0	0	0	0	0	0	0	0	0	0	0	0	0	0	0	0	0	7	0	0	0	0	0	0	0	0	0	0	0	0	0	0	0	0	1
ERV316A3_8q21.11d	0	0	0	0	0	0	0	0	0	0	0	0	0	1	0	0	0	0	0	0	0	0	1	0	0	0	0	0	3	0	0	25	0	2	0	1	0	0	0	1	0	0	1	0	1	0	0	0	0
ERV316A3_8q21.11e	1	2	1	2	22	7	1	1	2	3	0	8	1	56	1	0	1	1	2	1	0	4	2	3	4	3	1	1	20	10	3	19	18	1	3	0	1	1	1	5	6	1	4	6	5	0	6	5	6
ERV316A3_8q21.13a	0	0	0	0	0	0	0	0	0	0	0	1	0	0	0	0	1	0	0	0	0	0	0	0	0	0	0	0	1	0	1	9	1	0	0	0	0	0	0	0	0	0	0	0	0	0	0	1	0
ERV316A3_8q21.13b	0	0	0	0	1	0	0	1	0	0	0	1	0	0	0	0	0	0	0	0	0	0	0	0	0	0	0	0	2	2	0	21	0	0	1	1	0	0	0	0	0	1	0	0	0	0	0	1	0
ERV316A3_8q21.13c	0	0	0	0	0	2	0	0	0	0	0	0	0	1	0	0	0	0	0	0	0	0	0	0	0	0	0	0	0	0	0	26	10	0	1	0	0	0	0	0	0	0	0	0	0	0	0	5	0
ERV316A3_8q21.13d	0	1	0	1	1	2	2	1	0	2	0	0	0	1	0	0	2	0	0	2	0	0	0	0	0	0	0	0	4	1	0	10	4	1	0	0	0	2	0	0	1	0	3	0	4	0	2	0	1
ERV316A3_8q21.13e	2	1	3	1	2	0	2	1	0	3	0	1	0	5	0	0	2	0	0	2	0	1	4	1	2	1	0	4	2	3	2	16	7	0	0	0	0	0	0	0	3	1	1	1	2	0	0	1	0
ERV316A3_8q21.13f	0	1	0	3	0	0	0	0	0	0	0	0	0	0	0	0	1	0	0	0	1	0	1	0	0	0	1	3	2	0	3	25	0	0	0	0	1	1	0	0	2	0	1	0	1	0	1	1	0
ERV316A3_8q21.13g	0	1	1	1	0	0	0	1	0	0	0	0	0	0	0	0	0	0	0	0	0	0	1	0	0	0	0	0	0	1	0	25	1	0	0	0	0	0	0	0	1	0	0	0	1	0	0	3	0
ERV316A3_8q21.13h	13	1	1	0	0	1	0	3	0	0	0	0	2	0	1	0	2	1	2	3	0	0	4	1	0	0	0	1	14	0	1	26	3	9	0	1	0	1	1	5	3	0	4	0	2	0	6	3	1
ERV316A3_8q21.13i	0	0	0	0	0	0	0	1	0	0	0	0	0	1	0	0	0	0	0	0	0	0	1	0	0	0	0	0	2	1	1	8	0	0	0	0	0	0	0	0	0	0	0	0	0	0	1	1	0
ERV316A3_8q21.13j	13	26	0	27	34	1	8	51	0	0	1	0	0	35	9	0	0	0	0	0	25	0	16	13	0	3	2	50	50	74	11	32	2	36	4	0	8	0	8	0	39	1	44	0	0	0	3	5	0
ERV316A3_8q21.2	0	0	0	0	1	0	0	0	0	0	0	0	0	0	0	0	0	0	0	0	0	0	0	0	0	0	0	0	0	0	0	14	0	0	0	0	0	0	0	0	0	0	0	0	0	0	0	0	0
ERV316A3_8q21.3a	0	0	0	0	1	0	0	0	0	0	0	0	0	0	0	0	0	0	0	0	0	0	3	0	0	0	0	0	0	0	0	37	0	0	0	0	0	0	0	0	0	0	0	0	0	0	0	0	0
ERV316A3_8q21.3b	0	0	0	0	1	0	0	0	0	0	0	0	0	0	0	0	0	0	0	0	0	0	0	0	0	0	0	0	0	0	0	4	0	0	0	0	0	0	0	0	0	0	0	0	0	0	0	0	0
ERV316A3_8q21.3c	1	0	0	0	0	0	0	2	0	0	0	0	0	0	0	0	0	0	0	0	0	3	1	0	0	0	0	0	0	0	0	31	0	1	0	0	0	0	0	0	0	0	0	0	0	0	0	0	0
ERV316A3_8q21.3d	0	0	0	0	0	0	0	0	0	0	0	0	0	0	0	0	0	0	0	0	0	0	0	0	0	1	0	0	0	0	0	24	0	0	0	0	0	0	0	0	0	0	0	0	0	0	0	0	0
ERV316A3_8q21.3e	0	0	0	0	1	0	0	0	0	0	0	0	0	0	1	0	0	0	0	0	0	0	2	1	0	0	0	0	0	0	1	25	3	0	0	0	0	0	0	0	1	0	0	0	0	0	0	1	0
ERV316A3_8q21.3f	0	0	0	0	2	0	0	0	0	0	0	0	0	0	2	0	0	0	1	0	0	0	1	1	0	0	0	1	0	1	0	17	0	0	0	0	0	0	0	0	0	0	0	0	0	0	0	0	0
ERV316A3_8q21.3g	0	0	0	0	0	0	0	0	0	0	0	0	0	0	0	0	0	0	0	0	0	0	1	0	0	0	0	0	0	0	0	31	2	0	0	0	0	0	0	0	0	0	0	0	0	0	0	0	1
ERV316A3_8q21.3h	0	0	0	0	0	0	0	0	0	0	0	0	0	0	0	0	0	0	0	0	0	0	1	0	0	0	0	0	0	0	0	8	0	0	0	0	0	0	0	0	0	0	0	0	0	0	0	0	0
ERV316A3_8q21.3i	0	0	0	0	0	0	0	0	0	0	0	0	0	0	0	0	0	0	0	0	0	0	0	0	0	0	0	0	0	0	0	16	0	0	0	0	0	0	0	0	0	0	0	0	0	0	0	0	0
ERV316A3_8q22.1a	0	0	0	0	0	0	1	0	0	0	0	0	0	0	0	0	0	0	0	0	0	0	4	0	0	0	0	0	0	0	0	46	0	0	0	0	0	0	0	0	0	0	0	0	0	0	0	0	0
ERV316A3_8q22.1b	0	0	0	0	0	0	0	0	0	0	0	0	0	0	0	0	0	0	0	0	0	0	1	0	0	0	0	0	0	0	0	14	0	0	0	0	0	0	0	0	0	0	0	0	0	0	0	0	0
ERV316A3_8q22.1c	0	0	0	0	0	0	0	0	0	0	0	0	0	0	0	0	0	0	0	0	0	0	0	0	0	0	0	0	0	0	0	21	0	0	0	0	0	0	0	0	0	0	0	0	0	0	0	0	0
ERV316A3_8q22.1d	2	0	1	0	1	2	0	0	0	0	0	3	0	1	1	0	2	0	0	4	0	0	8	0	0	3	1	0	0	7	5	20	0	0	0	0	0	1	0	1	2	0	0	0	0	0	0	0	1
ERV316A3_8q22.3a	0	0	0	0	0	0	0	1	0	0	0	0	0	0	0	0	0	0	0	0	0	1	1	0	0	0	0	0	0	0	0	15	0	0	0	0	0	0	0	0	0	0	1	0	0	0	0	0	0
ERV316A3_8q22.3b	0	0	0	0	0	0	0	0	0	0	0	0	0	0	0	0	0	0	0	0	2	0	0	0	0	0	0	0	0	0	0	19	0	0	0	0	0	0	0	0	0	0	0	0	0	0	0	0	0
ERV316A3_8q22.3c	0	0	0	2	0	0	0	0	0	0	0	0	0	4	0	0	0	1	0	0	0	0	2	0	0	0	1	0	2	2	0	34	0	0	0	0	0	0	0	0	0	0	0	0	0	0	0	0	0
ERV316A3_8q23.1a	0	0	0	0	0	0	0	0	0	0	0	0	0	0	0	0	0	0	0	0	0	0	0	0	0	0	0	0	0	0	0	11	0	0	0	0	0	0	0	0	0	0	0	0	0	0	0	0	0
ERV316A3_8q23.1b	1	0	1	3	0	1	0	2	1	0	0	0	0	3	1	0	0	0	0	1	0	0	3	1	0	0	0	0	0	9	2	22	1	0	0	4	0	0	0	2	0	4	7	0	1	0	0	0	1
ERV316A3_8q23.1c	0	0	0	1	1	0	0	0	0	2	0	0	0	0	0	0	0	2	0	3	1	1	2	0	0	0	0	1	0	0	1	25	0	1	0	0	0	0	0	1	19	0	3	0	10	0	1	0	34
ERV316A3_8q23.2a	0	0	0	0	0	0	0	0	1	0	0	0	0	0	0	0	0	0	0	0	0	0	0	0	0	0	0	0	0	0	0	25	0	0	0	0	0	0	0	0	0	0	1	0	0	0	0	0	0
ERV316A3_8q23.2b	0	0	0	0	0	0	0	0	0	0	0	0	0	0	0	0	0	0	0	0	0	0	1	0	0	0	0	0	0	0	0	7	1	0	0	0	0	0	0	0	0	0	0	0	0	0	0	0	0
ERV316A3_8q23.2c	0	0	0	0	0	0	0	0	0	0	0	0	2	6	0	0	0	0	0	0	0	0	1	0	0	0	0	0	0	0	0	18	13	0	0	0	0	0	0	0	0	0	0	0	0	0	0	0	0
ERV316A3_8q23.3a	0	0	0	0	0	0	0	0	0	0	0	0	0	0	0	0	0	0	0	0	0	0	0	0	0	0	0	0	0	0	0	40	2	0	0	0	0	0	0	0	0	0	0	0	0	0	0	0	0
ERV316A3_8q23.3b	0	0	0	0	0	0	0	0	0	0	0	0	0	0	0	0	0	0	0	0	0	0	0	0	0	0	0	0	0	0	0	20	0	0	0	0	0	0	0	0	0	0	0	0	0	0	0	0	0
ERV316A3_8q23.3c	0	0	0	0	0	0	0	0	0	0	0	0	0	0	0	0	0	0	0	0	0	0	3	0	0	0	0	0	0	1	0	14	0	0	0	0	0	0	0	0	0	0	0	0	0	0	0	0	0
ERV316A3_8q23.3d	0	0	0	0	0	0	0	0	0	1	0	0	0	0	0	0	0	0	0	0	0	0	0	0	0	0	0	0	0	0	0	29	0	0	0	0	0	0	0	0	0	0	0	0	0	0	0	0	0
ERV316A3_8q23.3e	0	1	0	3	3	0	0	0	0	0	0	1	0	4	0	0	0	0	0	1	3	0	0	0	0	0	0	0	2	0	3	11	0	1	0	0	0	0	0	0	0	0	0	0	3	0	0	2	0
ERV316A3_8q23.3f	0	1	0	0	0	0	0	0	0	0	0	0	0	0	0	0	0	0	0	0	0	0	0	0	0	0	1	0	0	0	0	13	4	0	0	1	0	0	0	0	1	0	1	0	0	0	0	0	0
ERV316A3_8q23.3g	0	0	0	0	0	0	0	0	0	0	0	0	0	0	0	0	0	0	0	3	0	0	1	0	0	0	0	0	0	0	0	8	0	0	0	0	0	0	0	0	0	0	0	0	0	0	0	0	0
ERV316A3_8q23.3h	0	0	0	0	0	0	0	0	0	0	0	0	0	0	0	0	0	0	0	0	0	0	0	0	0	0	0	0	0	0	0	36	0	0	0	0	0	0	0	0	0	0	0	0	0	0	0	0	0
ERV316A3_8q24.11a	0	0	0	0	0	0	0	0	0	0	0	0	0	0	0	0	3	0	0	0	0	1	1	0	0	0	0	0	0	0	0	21	0	0	0	0	0	0	0	0	0	0	0	0	0	0	0	0	0
ERV316A3_8q24.11b	0	2	0	0	0	1	0	0	0	2	0	0	0	0	0	0	14	2	0	0	6	0	0	0	1	0	0	0	0	0	0	30	0	0	0	0	0	0	0	0	0	0	0	0	0	0	0	0	0
ERV316A3_8q24.11c	1	0	0	0	0	0	0	0	0	0	0	0	0	0	0	0	2	0	0	0	0	0	0	0	0	0	0	0	0	0	0	25	0	0	0	0	0	0	0	0	0	0	0	0	0	0	0	0	0
ERV316A3_8q24.11d	0	0	0	0	0	0	0	0	0	0	0	0	0	0	0	0	0	0	0	0	0	0	0	0	0	0	0	0	0	1	1	38	4	0	0	0	0	0	0	0	0	0	0	0	0	0	0	0	0
ERV316A3_8q24.12a	0	1	0	2	0	1	1	1	0	4	0	1	0	1	0	0	0	0	0	2	5	5	2	1	5	1	0	0	0	0	3	9	1	0	0	0	0	0	2	0	0	0	0	0	0	0	0	0	1
ERV316A3_8q24.12b	15	29	0	1	27	8	13	15	1	10	1	13	3	23	8	1	5	48	21	9	9	15	28	29	31	2	2	49	108	62	13	33	51	4	0	2	10	5	28	13	6	0	19	13	57	7	21	12	4
ERV316A3_8q24.12c	0	1	0	1	9	0	4	1	2	0	0	1	0	1	2	1	0	3	2	2	1	3	9	9	2	1	0	9	8	15	2	30	1	3	0	1	2	1	0	0	2	0	1	0	3	2	4	0	6
ERV316A3_8q24.12d	0	1	0	0	1	0	0	1	0	0	0	0	0	0	0	0	0	0	0	0	0	0	3	0	0	0	0	2	1	0	0	4	1	1	0	0	0	0	0	1	0	0	1	0	3	2	0	0	0
ERV316A3_8q24.12e	0	0	0	0	3	0	2	1	0	0	0	2	0	0	0	0	0	0	0	0	0	0	2	3	0	0	0	0	2	1	0	25	0	0	0	0	0	0	0	0	0	0	0	0	3	1	0	0	0
ERV316A3_8q24.12f	0	0	0	0	0	0	0	0	0	0	0	0	0	0	0	0	0	0	0	0	0	0	0	0	0	0	0	0	0	0	0	12	0	0	0	0	0	0	0	0	0	0	0	0	0	0	0	0	0
ERV316A3_8q24.13a	0	0	0	0	0	0	0	0	0	0	0	0	0	0	0	0	0	0	0	0	1	0	0	0	0	0	0	0	0	0	0	6	0	0	0	0	0	0	0	0	3	0	0	0	0	0	0	2	0
ERV316A3_8q24.13b	13	40	6	10	25	8	8	35	1	9	2	23	6	24	11	5	5	52	10	25	31	26	10	13	14	9	1	20	55	41	23	30	71	5	10	6	18	16	4	9	24	5	33	4	80	11	19	13	8
ERV316A3_8q24.13c	0	0	0	0	6	0	0	1	0	0	0	0	0	0	0	0	0	0	0	0	0	0	0	0	0	0	0	0	0	1	0	12	2	0	0	0	0	0	0	0	1	0	0	0	0	0	0	0	0
ERV316A3_8q24.13d	3	0	0	1	20	0	0	2	0	0	0	3	0	0	0	0	0	0	0	0	0	2	0	0	0	0	3	0	0	4	0	35	1	0	3	0	0	0	0	0	2	0	0	0	0	0	0	1	1
ERV316A3_8q24.21a	0	0	1	1	0	0	0	0	0	0	0	0	0	0	0	0	0	0	0	0	0	0	0	0	0	0	0	0	0	0	0	6	0	0	0	0	0	0	0	0	0	0	0	0	0	0	0	0	0
ERV316A3_8q24.21b	0	0	0	0	0	0	0	2	0	0	0	0	0	0	0	0	0	0	0	1	2	0	0	0	0	1	0	0	1	1	0	14	0	0	0	0	0	0	0	0	1	0	0	0	0	0	0	0	3
ERV316A3_8q24.21c	0	1	1	0	0	1	0	0	0	1	0	0	0	0	0	0	0	0	0	0	0	0	0	0	0	0	0	0	0	0	1	10	0	0	0	0	0	0	0	0	0	0	0	0	1	0	0	0	0
ERV316A3_8q24.22a	0	0	0	0	0	0	0	0	0	0	0	0	0	0	0	0	0	0	0	0	0	0	0	0	0	0	0	0	0	0	0	8	0	0	0	0	0	0	0	0	0	0	0	0	0	0	0	0	0
ERV316A3_8q24.22b	0	0	0	0	1	0	0	0	0	0	0	0	0	0	0	0	0	0	0	0	2	2	0	0	0	0	0	0	0	0	0	8	0	0	0	0	0	0	0	0	0	0	0	0	0	0	0	0	0
ERV316A3_8q24.22c	0	0	0	0	0	0	0	0	0	0	0	0	0	0	0	0	0	0	0	0	1	0	0	0	0	0	0	0	0	0	0	8	0	0	0	0	0	0	0	0	1	0	0	0	0	0	0	0	0
ERV316A3_8q24.22d	0	0	4	0	0	0	0	0	0	0	0	0	0	0	0	0	0	0	0	0	7	0	0	0	0	0	0	0	0	0	0	10	0	0	0	0	0	0	0	0	0	0	0	0	0	0	0	0	0
ERV316A3_8q24.22e	0	0	0	0	0	0	0	0	0	0	0	0	0	0	0	0	0	0	0	0	0	0	0	0	0	0	0	0	0	0	0	11	0	0	0	0	0	0	0	0	0	0	0	0	0	0	0	0	0
ERV316A3_8q24.22f	0	0	0	0	0	0	0	0	0	0	0	0	0	0	0	0	0	0	0	0	0	0	0	0	0	0	0	0	0	0	0	12	0	0	0	0	0	0	0	0	0	0	0	0	0	0	0	0	0
ERV316A3_8q24.22g	0	0	0	0	0	0	0	0	0	0	0	0	0	0	0	0	0	0	0	0	0	0	1	0	0	0	0	0	0	0	0	14	0	0	0	0	0	0	0	0	0	0	0	0	0	0	0	0	0
ERV316A3_8q24.22h	0	0	0	0	0	0	0	0	0	0	0	0	0	0	0	0	0	0	0	0	0	0	0	0	0	0	0	0	0	0	0	6	0	0	0	0	0	0	0	0	0	0	0	0	1	0	0	0	0
ERV316A3_8q24.22i	0	0	0	0	0	0	0	0	0	0	0	0	0	0	0	0	0	0	0	0	0	0	1	1	0	0	0	0	0	0	0	29	0	0	0	0	0	0	0	0	0	0	0	0	0	0	0	0	0
ERV316A3_8q24.22j	0	0	0	0	0	0	0	0	0	0	0	0	0	0	0	0	0	0	0	0	0	0	1	0	0	0	0	0	0	0	0	26	0	0	0	0	0	0	0	0	0	0	0	0	0	0	0	0	0
ERV316A3_8q24.23a	1	0	0	0	0	0	0	0	0	0	0	0	0	2	0	0	0	0	0	0	0	0	1	0	0	0	0	0	1	0	0	10	0	0	0	0	0	0	0	0	0	0	0	1	0	0	0	0	0
ERV316A3_8q24.23b	0	0	0	0	0	0	0	0	0	0	0	0	0	0	0	0	0	0	0	0	0	0	0	2	0	0	0	0	0	0	0	7	0	0	0	0	0	0	1	0	0	0	0	2	0	0	0	0	0
ERV316A3_8q24.23c	0	0	0	0	0	0	0	0	0	0	0	0	0	0	0	0	0	0	0	0	0	0	2	1	0	0	0	0	0	0	0	25	0	0	0	0	0	0	0	0	0	0	0	0	0	0	0	0	0
ERV316A3_8q24.23d	0	0	0	0	0	0	0	0	0	0	0	0	0	0	0	0	0	0	0	0	0	0	1	2	0	0	0	0	0	0	0	14	0	0	0	0	0	0	0	0	0	0	0	0	0	0	0	0	0
ERV316A3_8q24.23e	0	0	0	0	2	0	0	0	0	0	0	0	0	0	0	0	0	0	0	0	0	0	0	0	0	0	0	0	0	0	0	17	0	0	0	0	0	0	0	0	0	0	0	0	0	0	0	0	0
ERV316A3_8q24.23f	0	0	0	0	0	0	0	0	0	0	0	0	0	0	0	0	0	0	0	0	0	0	0	0	0	0	0	0	0	0	0	6	0	0	0	0	0	0	0	0	0	0	0	0	0	0	0	0	0
ERV316A3_8q24.23g	0	0	0	1	1	0	0	0	0	0	0	0	0	11	0	0	0	0	0	0	0	0	0	0	0	0	1	0	3	0	0	10	0	0	2	1	0	0	0	0	0	0	0	0	0	0	0	1	0
ERV316A3_8q24.23h	0	0	0	0	1	0	0	0	0	0	0	0	0	7	0	0	0	0	0	0	0	1	0	0	0	0	0	0	12	0	0	16	0	0	6	0	0	0	0	0	0	0	0	0	0	0	0	0	0
ERV316A3_8q24.23i	0	0	0	0	1	0	0	0	0	0	0	1	1	12	0	0	0	0	0	0	0	4	0	0	0	0	1	0	9	0	0	7	0	0	2	0	0	1	0	0	0	0	1	0	0	0	0	1	0
ERV316A3_8q24.23j	0	0	0	0	0	0	0	0	0	0	0	0	0	0	0	0	0	0	0	0	0	0	0	0	0	0	0	0	0	1	0	18	0	0	0	0	0	0	0	0	1	0	0	0	0	0	0	0	0
ERV316A3_8q24.23k	0	0	0	0	0	0	0	0	0	0	0	0	0	0	0	0	0	0	0	0	0	0	2	0	0	0	0	0	0	0	0	29	0	0	0	0	0	0	0	0	0	0	0	0	0	0	0	0	0
ERV316A3_8q24.3a	0	0	0	0	0	0	0	0	0	0	0	0	0	0	0	0	0	0	0	0	0	0	0	0	0	0	0	0	0	0	0	13	0	0	0	0	0	0	0	0	0	0	0	0	0	0	0	0	0
ERV316A3_8q24.3b	0	0	0	0	0	0	0	0	0	0	0	0	0	0	0	0	0	0	0	0	0	0	1	0	0	0	0	0	0	0	0	20	0	0	0	0	0	0	0	0	0	0	0	0	0	0	0	0	0
ERV316A3_8q24.3c	0	0	0	0	0	0	0	0	0	0	0	0	0	0	0	0	0	0	0	0	0	0	0	0	0	0	0	0	0	0	0	10	0	0	0	0	0	0	0	0	0	0	0	0	0	0	0	0	0
ERV316A3_8q24.3d	0	0	0	0	0	0	0	0	0	0	0	0	0	0	0	0	0	0	0	0	0	0	1	0	0	0	0	0	0	0	0	6	0	0	0	0	0	0	0	0	0	0	0	0	0	0	0	0	0
ERV316A3_8q24.3e	0	0	0	0	0	0	0	0	0	0	0	0	0	0	0	0	0	0	0	0	0	0	1	0	0	0	0	0	0	0	0	17	0	0	0	0	0	0	0	0	0	0	0	0	0	0	0	0	0
ERV316A3_8q24.3f	0	0	0	0	0	0	0	0	0	0	0	0	0	0	0	0	0	0	0	0	0	0	0	0	0	0	0	0	0	0	0	6	0	0	0	0	0	0	0	0	0	0	0	0	0	0	0	0	0
ERV316A3_8q24.3g	0	0	0	0	0	0	0	0	0	0	0	0	0	0	0	0	0	0	0	0	0	0	1	0	0	0	0	0	0	0	0	13	0	0	0	0	0	0	0	0	0	0	0	0	0	0	0	0	0
ERV316A3_8q24.3h	0	0	0	0	0	0	0	0	0	0	0	0	0	0	0	0	0	0	0	0	0	0	0	0	0	0	0	0	0	0	0	9	0	0	0	0	0	0	0	0	0	0	0	0	0	0	0	0	0
ERV316A3_8q24.3i	0	0	0	0	0	0	0	0	0	1	0	0	0	0	0	0	0	0	0	0	0	0	0	0	0	0	0	0	0	0	0	16	0	0	0	0	0	0	0	0	0	0	0	0	0	0	0	0	0
ERV316A3_8q24.3j	0	0	0	0	0	0	0	2	0	0	0	0	0	1	1	0	0	0	1	1	1	0	1	1	1	1	0	0	2	0	3	11	1	0	2	0	0	0	0	0	0	0	1	0	0	1	0	0	0
ERV316A3_8q24.3k	9	7	6	17	31	2	8	19	4	16	1	28	18	14	9	7	8	18	16	8	8	8	21	13	11	35	13	8	25	69	49	32	40	2	8	1	8	12	12	19	19	14	9	5	82	12	6	21	13
ERV316A3_9p11.2	0	0	0	0	0	0	0	0	0	0	0	0	0	0	0	0	0	0	0	0	0	0	0	0	0	1	0	0	0	1	0	6	7	0	1	0	0	0	0	0	0	0	0	0	0	0	0	0	0
ERV316A3_9p13.3a	5	5	6	4	2	7	8	10	1	9	0	0	0	12	4	1	7	2	2	6	13	22	8	0	5	1	0	9	5	14	5	54	6	0	5	0	5	0	4	2	2	3	8	1	12	4	12	0	2
ERV316A3_9p13.3b	59	0	0	2	13	6	0	6	13	0	0	0	0	35	0	0	0	0	1	10	0	0	2	0	57	0	0	1	2	0	12	64	70	0	31	0	1	0	0	0	5	0	0	1	2	0	1	179	1
ERV316A3_9p21.1a	0	0	0	0	0	0	0	0	0	0	0	0	0	0	0	0	0	0	0	0	0	0	0	1	0	0	0	0	0	0	0	5	0	0	0	0	0	0	0	0	0	0	0	0	0	0	0	0	0
ERV316A3_9p21.1b	0	0	0	7	0	3	0	100	0	0	1	44	0	0	0	0	0	0	1	0	13	0	3	0	4	0	21	9	17	1	69	53	60	0	4	0	0	43	13	0	134	1	30	10	8	0	0	56	0
ERV316A3_9p21.1c	0	0	0	0	0	0	0	0	0	0	0	0	0	0	0	0	0	0	0	0	0	0	0	0	0	0	0	0	0	0	0	7	0	0	0	0	0	0	0	0	0	0	0	0	0	0	0	0	0
ERV316A3_9p21.1d	0	0	0	0	1	0	0	0	0	0	0	0	0	0	0	0	0	0	0	0	0	0	0	0	0	0	0	0	0	0	0	19	0	0	0	0	0	0	0	0	0	0	0	0	0	0	0	0	0
ERV316A3_9p21.1e	0	0	0	0	0	0	0	0	0	0	0	0	0	0	0	0	0	0	0	0	0	0	0	0	0	0	0	0	0	0	0	11	0	0	0	0	0	0	0	0	0	0	0	0	0	0	0	0	0
ERV316A3_9p21.2	0	1	0	0	0	0	0	0	0	0	1	0	0	1	0	0	0	0	1	0	0	0	0	0	0	0	0	0	0	0	0	9	0	0	0	0	0	0	0	0	0	0	0	0	0	0	0	0	0
ERV316A3_9p21.3	0	0	0	0	0	0	0	0	0	0	0	0	0	0	0	0	0	0	0	0	0	0	0	0	0	0	0	1	0	0	0	27	0	0	0	0	0	0	0	0	0	0	0	0	0	0	0	1	0
ERV316A3_9p22.2	0	0	0	0	0	0	0	0	0	0	0	0	0	0	0	0	0	0	0	0	0	0	0	0	0	0	0	0	0	0	0	7	0	0	0	0	0	0	0	0	0	0	0	0	0	0	0	0	0
ERV316A3_9p22.3	0	0	0	0	0	0	0	0	0	0	0	0	0	0	0	0	0	0	0	0	0	0	1	0	0	1	0	0	0	0	0	16	0	0	0	0	0	0	0	0	0	0	0	0	0	1	0	1	0
ERV316A3_9p23a	0	0	0	0	0	0	0	0	0	0	0	0	0	0	0	0	0	0	0	0	0	0	1	0	0	0	0	0	0	0	0	33	0	0	0	0	0	0	0	0	0	0	0	0	0	0	0	0	0
ERV316A3_9p23b	0	0	0	0	0	0	0	0	0	0	0	0	0	0	0	0	0	0	0	0	0	0	1	0	0	0	0	0	0	0	0	42	0	0	0	0	0	0	0	0	0	0	0	0	0	0	0	0	0
ERV316A3_9p23c	0	0	0	0	0	0	0	0	0	0	0	0	0	0	0	0	0	0	0	0	0	0	0	0	0	0	0	0	0	0	0	6	0	0	0	0	0	0	0	0	0	0	0	0	0	0	0	0	0
ERV316A3_9p23d	0	0	0	0	0	0	0	0	0	0	0	0	0	0	0	0	0	0	0	0	0	0	0	0	0	0	0	0	0	0	0	18	0	0	0	0	0	0	0	0	0	0	0	0	0	0	0	0	0
ERV316A3_9p23e	0	0	0	0	0	0	0	0	0	0	0	0	0	0	0	0	0	0	0	0	0	0	1	0	0	0	0	0	0	0	0	6	0	0	0	0	0	0	0	0	0	0	0	0	0	0	0	0	0
ERV316A3_9p23f	0	0	0	3	0	0	0	0	0	0	0	0	0	1	0	0	0	0	0	0	0	0	3	0	0	0	0	0	0	0	0	31	8	1	0	0	0	0	0	0	0	0	0	2	0	0	0	3	0
ERV316A3_9p23g	0	0	0	1	55	0	0	1	0	0	0	0	0	0	0	0	0	0	0	0	0	0	0	0	0	0	0	0	0	0	0	30	1	0	1	0	0	0	0	0	0	0	1	0	0	0	0	2	0
ERV316A3_9p24.1	0	1	1	1	4	0	0	2	0	3	0	0	0	5	1	0	0	0	0	0	0	0	4	0	0	0	1	0	1	1	4	8	1	0	1	0	1	0	0	0	1	2	2	1	0	1	0	0	2
ERV316A3_9p24.2a	0	0	0	0	0	0	0	0	0	0	0	0	0	0	0	0	1	0	0	1	0	0	0	0	0	0	0	0	0	0	0	28	0	0	0	0	0	0	0	0	0	0	1	0	2	0	0	0	0
ERV316A3_9p24.2b	0	0	0	2	2	0	1	1	0	1	0	0	0	0	0	0	0	0	0	0	1	0	0	0	0	0	0	0	0	0	0	17	1	0	0	0	0	0	0	0	0	0	0	0	0	0	0	0	0
ERV316A3_9p24.3a	0	0	0	0	0	0	0	0	0	0	0	0	0	0	0	0	0	0	0	0	0	0	0	0	0	0	0	0	0	0	1	6	0	0	0	0	0	0	1	0	0	0	0	0	0	0	0	0	0
ERV316A3_9p24.3b	0	0	0	0	0	0	0	0	0	0	0	0	0	0	0	0	0	0	0	0	0	0	0	0	0	0	0	0	0	0	0	10	0	0	0	0	0	0	0	0	0	0	0	0	0	0	0	0	0
ERV316A3_9p24.3c	0	0	1	0	1	0	0	0	0	2	0	0	0	3	1	0	0	0	1	0	0	1	6	0	0	0	0	2	0	0	1	48	0	0	0	0	0	1	1	0	0	0	0	0	0	0	0	0	0
ERV316A3_9p24.3d	0	0	0	0	0	0	0	0	0	0	0	0	0	0	0	0	2	0	0	0	0	0	1	0	0	0	0	0	0	0	0	29	0	0	0	0	0	0	0	0	0	0	0	0	0	0	0	0	0
ERV316A3_9q13	0	0	1	0	0	0	0	0	0	0	0	0	0	0	0	0	0	0	0	0	0	0	0	0	0	0	0	0	0	0	0	73	1	0	0	0	0	0	0	0	0	0	0	0	0	0	0	0	0
ERV316A3_9q21.13a	0	0	0	0	0	0	1	4	0	2	0	0	0	1	1	0	0	0	1	0	0	0	4	3	0	0	1	0	1	2	0	18	0	0	0	0	0	0	0	0	0	1	2	0	1	0	1	0	1
ERV316A3_9q21.13b	0	0	0	0	0	0	0	0	0	0	0	0	0	0	3	0	0	0	0	0	0	0	0	0	0	0	0	0	0	1	0	9	0	0	0	0	0	0	0	0	0	0	0	0	0	0	0	0	0
ERV316A3_9q21.13c	0	0	0	0	0	0	0	0	0	0	0	0	0	1	0	0	0	0	0	0	0	0	0	0	0	0	0	0	0	0	0	15	0	0	0	0	0	0	0	0	0	0	0	0	0	0	0	0	0
ERV316A3_9q21.31a	0	0	0	0	1	0	0	0	0	0	0	0	0	0	0	0	0	0	0	0	0	0	0	0	0	0	0	0	0	0	0	8	0	0	0	0	0	0	0	0	0	0	0	0	0	0	0	0	0
ERV316A3_9q21.31b	0	0	0	0	0	0	0	1	0	0	0	0	0	0	0	0	0	0	0	0	0	0	2	1	0	0	0	0	0	0	0	48	0	0	0	0	0	0	0	0	0	0	0	0	0	0	1	0	0
ERV316A3_9q21.31c	0	0	0	0	0	0	0	0	0	0	0	0	0	0	0	0	0	0	0	0	0	0	1	0	0	0	0	0	0	0	0	17	0	0	0	0	0	0	0	0	0	0	0	0	0	0	0	0	0
ERV316A3_9q21.32	0	0	0	1	0	0	0	0	0	0	0	0	0	0	0	0	0	0	0	0	0	0	1	0	0	0	0	0	0	0	0	16	0	0	0	0	0	0	0	0	0	0	0	0	0	0	0	0	0
ERV316A3_9q21.33	0	1	0	0	0	0	0	0	0	1	0	1	0	1	1	0	0	0	0	1	1	0	1	0	0	0	0	0	1	0	0	7	0	0	0	0	0	0	3	0	1	0	0	0	0	0	0	0	1
ERV316A3_9q22.2	0	3	0	0	0	0	0	0	0	16	0	0	0	0	0	0	1	0	0	0	0	0	0	0	0	0	0	1	0	0	1	14	0	0	0	0	0	0	0	1	0	0	0	1	0	0	0	2	0
ERV316A3_9q22.33a	0	0	0	0	0	0	0	0	0	0	0	0	0	0	0	0	0	0	0	0	0	0	0	0	0	0	0	0	0	0	0	43	0	0	0	0	0	0	0	0	0	0	0	0	0	0	0	0	0
ERV316A3_9q22.33b	0	0	0	0	0	0	0	0	0	0	0	0	0	0	0	0	0	0	0	0	0	0	0	0	0	0	0	0	0	0	0	31	0	0	0	0	0	0	0	0	0	0	0	0	0	0	0	0	0
ERV316A3_9q31.1a	0	0	0	0	0	0	0	0	0	0	0	0	0	0	0	0	0	0	0	0	0	0	0	0	0	0	0	0	0	0	0	28	0	0	0	0	0	0	0	0	0	0	0	0	0	0	0	0	0
ERV316A3_9q31.1b	0	0	0	0	0	0	0	0	0	0	0	0	0	0	0	0	0	0	0	0	0	0	0	0	0	0	0	0	0	0	0	42	0	0	0	0	0	0	0	0	0	0	0	0	0	0	0	0	0
ERV316A3_9q31.1c	0	0	0	0	0	0	1	0	0	0	0	0	0	0	0	0	0	0	0	1	0	0	0	0	0	0	0	0	0	0	0	16	0	0	0	0	0	0	0	0	0	0	0	2	1	0	0	0	0
ERV316A3_9q31.1d	0	0	0	0	0	0	0	0	0	0	0	0	0	0	0	0	0	0	0	1	0	0	1	0	0	0	0	0	0	0	0	19	0	0	0	0	0	0	0	0	0	0	0	0	0	0	0	0	0
ERV316A3_9q31.3	0	3	50	0	0	5	3	0	4	7	0	0	2	1	19	3	8	4	0	2	7	4	7	9	0	1	0	1	7	2	0	19	0	1	0	3	0	0	1	0	0	0	1	0	0	1	0	0	0
ERV316A3_9q32a	0	2	0	1	0	0	0	0	0	0	0	1	2	0	0	0	1	0	1	1	0	0	3	1	1	0	0	1	2	1	0	22	1	0	1	0	1	2	0	1	4	0	0	0	9	3	0	0	4
ERV316A3_9q32b	0	1	0	0	0	0	0	0	0	2	0	0	0	1	0	0	0	0	1	0	0	0	3	1	1	0	0	0	0	0	0	5	1	0	0	0	0	1	0	1	1	1	2	0	0	1	1	0	1
ERV316A3_9q33.1	0	0	0	0	1	0	0	0	0	0	0	0	0	0	0	0	0	0	0	3	2	0	2	0	0	0	0	0	0	0	0	5	0	0	0	0	0	0	0	0	0	0	0	0	0	0	1	0	1
ERV316A3_9q33.2	0	0	7	0	1	1	4	6	2	0	0	2	0	7	0	1	3	0	2	6	4	3	2	1	2	13	3	0	1	4	20	18	0	0	1	0	0	14	3	2	7	0	2	4	6	0	5	5	1
ERV316A3_9q33.3	0	0	0	0	1	0	0	0	0	2	0	0	0	0	1	0	0	0	0	0	0	0	0	0	0	0	0	1	0	1	0	6	0	0	0	1	0	0	0	0	0	2	0	0	0	0	0	0	0
ERV316A3_9q34.12	0	0	0	0	0	0	0	0	0	0	0	0	0	0	2	0	1	0	0	0	0	0	0	0	0	0	0	0	0	0	0	18	0	0	0	0	0	0	0	1	0	0	0	0	0	0	0	0	0
ERV316A3_9q34.13	0	2	0	4	1	1	1	1	0	4	0	0	0	2	0	0	4	1	0	4	2	0	5	0	1	0	0	0	5	1	5	19	6	0	0	1	1	2	1	2	2	0	1	1	3	2	0	1	3
ERV316A3_9q34.2a	1	2	0	0	6	1	0	3	0	0	0	0	0	0	0	0	0	0	1	4	1	1	0	1	0	1	0	1	0	3	3	23	3	1	0	0	0	0	0	2	2	0	4	0	4	0	0	1	2
ERV316A3_9q34.2b	3	5	0	11	5	0	2	2	3	1	4	1	0	1	3	3	1	3	4	4	7	3	4	4	1	0	5	1	13	5	7	16	4	1	6	1	2	7	4	12	3	4	5	1	6	2	0	9	6
ERV316A3_9q34.3a	0	0	0	2	0	0	0	0	0	0	0	0	0	0	1	0	0	0	2	1	0	0	1	0	0	0	0	0	1	2	0	12	0	0	0	0	0	1	0	1	0	0	0	0	1	0	0	0	0
ERV316A3_9q34.3b	0	4	3	0	5	0	0	1	0	0	0	0	3	1	0	0	0	0	3	6	0	1	7	6	1	0	0	1	3	0	1	34	2	2	0	0	1	0	5	10	38	9	0	3	26	9	5	1	11
ERV316A3_9q34.3c	0	0	0	0	1	0	0	0	0	0	0	1	0	0	0	0	0	0	0	0	0	0	3	0	1	0	0	0	3	3	0	29	0	0	1	0	0	0	5	0	1	0	0	1	5	2	0	0	0
ERV316A3_9q34.3d	0	0	1	0	0	0	0	4	0	0	0	2	0	2	5	0	0	3	1	3	4	0	1	1	1	4	2	0	2	0	0	12	1	0	1	2	1	1	1	1	0	0	0	2	14	0	0	1	1
ERV316A3_Xp11.22a	0	0	0	0	0	0	0	0	0	0	0	0	0	0	0	0	0	0	0	0	0	0	0	0	0	0	0	0	0	0	0	7	0	0	0	0	0	0	0	0	0	0	0	0	0	0	0	0	0
ERV316A3_Xp11.22b	0	0	0	0	0	0	0	0	0	0	0	0	0	0	0	0	0	0	0	0	0	0	0	0	0	0	0	0	1	0	1	20	0	0	0	0	0	0	0	0	0	0	0	1	0	0	0	0	0
ERV316A3_Xp11.22c	0	0	0	0	0	0	0	0	0	0	0	0	0	0	0	0	0	0	0	0	0	0	1	0	0	0	0	0	0	0	0	18	0	0	0	0	0	0	0	0	0	0	0	0	0	0	0	0	0
ERV316A3_Xp11.22d	0	0	0	0	1	0	0	0	0	0	0	1	0	0	0	0	0	0	0	0	0	0	0	0	0	0	0	0	0	0	0	1	0	0	0	0	0	0	0	0	0	0	0	0	0	0	0	0	0
ERV316A3_Xp11.23a	0	0	0	1	0	0	0	1	0	0	0	0	0	1	0	0	0	0	1	0	0	0	2	1	1	0	1	0	0	1	0	35	1	0	0	0	0	0	0	0	0	1	1	0	2	0	2	0	0
ERV316A3_Xp11.23b	0	0	0	0	0	0	0	0	0	0	0	0	0	0	0	0	0	0	0	0	0	0	0	0	0	0	0	0	0	0	0	11	0	0	0	0	0	0	0	0	0	0	0	0	0	0	0	0	0
ERV316A3_Xp11.23c	0	0	0	0	0	0	0	0	0	0	0	0	0	0	0	0	0	0	0	0	0	0	0	0	0	0	0	0	0	0	0	19	0	0	0	0	0	0	0	0	0	0	0	0	0	0	0	0	0
ERV316A3_Xp11.23d	0	0	0	0	0	0	0	0	0	0	0	0	0	0	0	0	0	0	0	0	0	0	0	0	0	0	0	0	0	0	0	17	0	0	0	0	0	0	0	0	0	0	0	0	0	0	0	0	0
ERV316A3_Xp11.3a	0	0	0	0	0	0	0	0	0	0	0	0	0	0	0	0	0	0	0	0	0	0	1	0	0	0	0	0	0	0	0	7	0	0	0	0	0	0	0	0	0	0	0	0	0	0	0	0	0
ERV316A3_Xp11.3b	0	0	0	0	0	0	0	0	0	0	0	0	0	0	0	0	0	0	0	0	0	0	0	0	0	0	0	0	0	0	0	14	0	0	0	0	0	0	0	0	0	0	0	0	0	0	0	0	0
ERV316A3_Xp11.3c	0	0	2	0	0	0	3	1	0	4	0	0	0	0	0	0	0	0	13	0	0	1	0	1	1	0	1	78	0	4	0	12	0	1	1	0	1	0	0	4	4	0	7	0	1	0	0	0	0
ERV316A3_Xp11.4a	0	0	0	0	0	0	0	0	0	0	0	0	0	0	0	0	0	0	0	0	0	0	1	0	0	0	0	0	0	0	0	19	0	0	0	0	0	0	0	0	0	0	0	0	0	0	0	0	0
ERV316A3_Xp11.4b	0	0	0	0	0	0	0	0	0	0	0	0	0	0	0	0	0	0	0	0	0	0	0	0	0	0	0	0	0	0	0	5	0	0	0	0	0	0	0	0	0	0	0	0	0	0	0	0	0
ERV316A3_Xp11.4c	0	1	0	0	0	0	0	0	0	0	0	0	0	0	0	0	0	0	0	0	0	0	1	0	0	0	0	0	0	0	0	19	0	0	0	0	0	0	0	0	0	0	0	0	0	0	0	0	0
ERV316A3_Xp11.4d	0	1	0	0	0	0	0	0	0	0	0	0	0	1	2	0	0	0	0	1	0	0	0	0	0	0	0	0	0	1	0	13	0	0	0	0	0	0	0	1	1	0	0	0	2	0	0	0	0
ERV316A3_Xp21.1a	0	0	0	0	0	0	0	0	0	0	0	0	0	0	0	0	0	0	0	0	0	3	0	0	0	0	0	0	0	0	0	8	0	0	0	0	0	0	1	0	0	0	0	0	0	0	0	0	0
ERV316A3_Xp21.1b	0	0	0	0	0	0	0	0	0	0	0	0	0	0	0	0	0	0	0	0	0	1	1	1	0	0	0	0	0	0	0	4	0	0	0	0	0	0	0	0	1	0	0	0	0	0	0	0	0
ERV316A3_Xp21.1c	0	0	0	0	0	0	0	0	0	0	0	0	0	0	0	0	0	0	0	0	0	0	1	0	0	0	0	0	1	0	0	8	0	0	0	0	0	0	0	0	0	0	0	0	0	0	0	0	0
ERV316A3_Xp21.1d	20	1	0	6	9	1	0	14	1	0	0	4	0	16	0	7	0	0	0	0	9	0	6	0	1	0	0	37	3	13	0	18	0	5	0	0	0	12	0	0	16	1	19	0	2	0	0	2	0
ERV316A3_Xp21.1e	0	0	0	0	0	0	0	0	0	0	0	0	0	0	0	0	0	0	0	0	0	0	0	0	0	0	0	0	0	0	0	7	0	0	0	0	0	0	0	0	0	0	0	0	0	0	0	0	0
ERV316A3_Xp21.2	0	0	0	0	0	0	0	0	0	0	0	0	0	0	0	0	0	0	0	0	0	0	0	0	0	0	0	0	0	0	0	10	0	0	0	0	0	0	0	0	0	0	0	0	0	0	0	0	1
ERV316A3_Xp21.3a	0	0	0	0	0	0	0	0	0	0	0	0	0	0	0	0	0	0	0	0	0	0	0	0	0	0	0	0	0	0	0	4	0	0	0	0	0	0	0	0	0	0	0	0	0	0	0	0	0
ERV316A3_Xp21.3b	0	0	0	0	0	0	0	0	0	0	0	0	0	0	0	0	0	0	0	0	0	0	0	0	0	0	0	0	0	0	0	1	0	0	0	0	0	0	0	0	0	0	0	0	0	0	0	0	0
ERV316A3_Xp21.3c	0	0	0	0	0	0	0	0	0	0	0	0	0	0	0	0	0	0	0	0	0	0	0	0	0	0	0	0	0	0	0	12	1	0	0	0	0	0	0	0	0	0	0	0	0	0	0	0	0
ERV316A3_Xp21.3d	0	0	0	0	0	0	0	0	0	0	0	0	0	0	0	0	0	0	0	0	0	0	0	0	0	0	0	0	0	0	0	5	0	0	0	0	0	0	0	0	0	0	0	0	0	0	0	0	0
ERV316A3_Xp21.3e	0	0	0	0	0	0	0	0	0	0	0	0	0	0	0	0	0	0	0	0	0	0	0	0	0	0	0	0	0	0	0	8	0	0	0	0	0	0	0	0	0	0	0	0	0	0	0	0	0
ERV316A3_Xp21.3f	0	0	0	0	0	0	0	0	0	0	0	0	0	0	0	0	0	0	0	0	0	0	0	0	0	0	0	0	0	0	0	2	0	0	0	0	0	0	0	0	0	0	0	0	0	0	0	0	0
ERV316A3_Xp22.11	14	18	1	0	6	2	1	17	8	24	0	3	9	14	6	8	11	1	57	25	71	4	13	18	0	8	1	3	8	32	8	18	3	4	35	16	9	11	7	18	7	61	31	0	8	4	4	9	1
ERV316A3_Xp22.12	0	0	0	0	0	0	0	0	0	0	0	0	0	0	0	0	0	0	0	0	0	1	2	0	0	0	0	0	0	0	0	3	0	0	0	0	0	0	0	0	0	0	0	0	0	0	0	0	0
ERV316A3_Xp22.13	0	0	0	0	0	0	0	1	2	0	0	0	0	1	0	0	0	0	0	0	0	0	0	0	0	0	0	0	0	2	0	5	6	0	1	0	0	0	0	0	1	0	0	0	0	0	0	1	0
ERV316A3_Xp22.33	0	0	0	0	0	0	0	0	0	0	0	0	0	0	0	0	0	0	0	0	0	0	0	0	0	0	0	0	0	0	0	11	0	0	0	0	0	0	0	0	0	0	0	0	0	0	0	0	0
ERV316A3_Xq21.1a	0	0	0	0	0	0	0	1	0	0	0	0	0	0	0	0	0	0	0	0	0	0	0	0	0	0	0	0	0	0	3	11	0	0	0	0	0	1	0	0	0	0	0	0	0	0	0	0	1
ERV316A3_Xq21.1b	0	0	0	0	0	0	0	0	0	0	0	0	0	1	0	0	0	0	0	0	0	0	0	1	0	0	0	0	0	0	0	7	0	0	0	0	0	0	0	0	0	0	0	0	0	0	0	0	0
ERV316A3_Xq21.1c	0	0	0	0	0	0	0	0	0	0	0	0	0	0	0	0	0	0	0	0	0	0	0	0	0	0	0	0	0	0	0	6	0	0	0	0	0	0	0	0	0	0	0	0	0	0	0	0	0
ERV316A3_Xq21.31a	0	0	0	0	0	0	0	0	0	0	0	0	0	0	0	0	0	0	0	0	0	0	0	0	0	0	0	0	0	0	0	19	0	0	0	0	0	0	0	0	0	0	0	0	0	0	0	0	0
ERV316A3_Xq21.31b	0	0	0	0	0	0	0	0	0	0	0	0	0	0	0	0	0	0	0	0	0	0	1	0	0	0	0	0	0	0	0	12	0	0	0	0	0	0	0	0	1	0	0	0	0	0	0	0	0
ERV316A3_Xq21.31c	0	0	0	0	0	0	0	0	0	0	0	0	0	1	0	0	0	0	0	0	0	0	0	0	0	0	0	0	0	0	0	5	0	0	0	0	0	0	0	0	0	0	0	0	0	0	0	1	0
ERV316A3_Xq21.32	0	0	0	0	0	0	0	0	0	0	0	0	0	0	0	0	0	0	0	0	0	0	0	0	0	0	0	0	0	0	0	5	0	0	0	0	0	0	0	0	0	0	0	0	0	0	0	0	0
ERV316A3_Xq21.33a	0	0	0	0	0	0	0	0	0	0	0	0	0	0	0	0	1	0	0	0	0	0	0	0	0	0	0	0	0	0	0	13	0	0	0	0	0	0	0	0	0	0	0	1	0	0	0	0	0
ERV316A3_Xq21.33b	0	0	0	0	0	0	0	0	0	0	0	0	0	0	0	0	0	0	0	0	0	0	0	0	0	0	0	0	0	0	0	2	0	0	0	0	0	0	0	0	0	0	0	0	0	0	0	0	0
ERV316A3_Xq22.1a	0	0	0	0	0	0	0	0	0	0	0	0	0	0	0	0	0	0	0	0	0	0	0	0	0	0	0	0	0	0	0	6	0	0	0	0	0	0	0	0	0	0	0	0	0	0	0	0	0
ERV316A3_Xq22.1b	0	0	0	0	0	0	0	0	0	0	0	0	0	0	0	0	0	0	0	0	0	0	0	0	0	0	0	0	0	0	0	9	0	0	0	0	0	0	0	0	0	0	0	0	0	0	0	0	0
ERV316A3_Xq22.1c	0	0	0	0	0	0	0	0	0	0	0	0	0	0	0	0	0	0	0	0	0	0	0	0	0	0	0	0	0	0	0	0	0	0	0	0	0	0	0	0	0	0	0	0	0	0	0	0	0
ERV316A3_Xq22.3a	0	0	0	0	0	0	0	0	0	0	0	0	0	0	0	0	0	0	0	0	0	0	2	0	0	0	0	0	1	0	0	7	0	0	0	0	0	0	0	0	0	0	0	0	0	0	0	0	0
ERV316A3_Xq22.3b	0	0	0	0	0	0	0	0	0	0	0	0	0	0	0	0	0	0	0	0	0	0	2	2	0	0	0	0	0	3	0	7	0	0	0	0	0	0	0	0	0	0	0	0	1	0	0	2	0
ERV316A3_Xq22.3c	0	0	0	0	0	0	0	0	0	0	0	0	0	0	0	0	0	0	0	0	0	0	0	0	0	0	0	0	1	0	0	9	0	0	0	0	0	0	0	0	0	0	0	0	0	0	0	0	0
ERV316A3_Xq22.3d	0	0	0	0	0	0	0	0	1	0	0	0	0	1	0	0	0	0	1	0	0	0	1	0	0	0	0	1	0	2	0	3	2	0	0	0	0	0	2	0	0	0	0	0	0	0	0	0	0
ERV316A3_Xq23a	0	0	0	0	0	0	0	0	0	0	0	0	0	0	0	0	0	0	0	0	0	0	1	0	0	0	0	0	0	0	0	4	1	0	0	0	0	1	0	0	0	0	0	0	0	0	0	0	0
ERV316A3_Xq23b	0	0	0	0	1	0	0	0	1	2	0	0	0	5	1	1	0	0	0	0	0	0	0	0	1	1	0	0	2	1	1	12	0	0	0	0	0	0	4	0	2	7	0	0	2	1	1	1	3
ERV316A3_Xq23c	0	0	0	0	0	0	0	1	0	0	0	0	0	0	0	0	0	0	0	0	0	0	0	0	0	0	0	0	0	0	0	14	0	0	0	0	0	0	0	0	0	0	0	0	0	0	0	0	0
ERV316A3_Xq24a	0	0	0	0	0	0	0	0	0	0	0	0	0	0	0	0	0	0	0	0	0	0	0	0	0	0	0	0	0	0	0	9	0	0	0	0	0	0	0	0	0	0	0	0	0	0	0	0	0
ERV316A3_Xq24b	0	0	0	0	0	0	0	0	0	0	0	0	0	0	0	0	0	0	0	0	0	0	0	0	0	0	0	0	0	0	0	5	0	0	0	0	0	0	0	0	0	0	0	0	0	0	0	0	0
ERV316A3_Xq25a	0	0	0	0	0	0	0	0	0	0	0	0	0	0	0	0	0	0	0	0	0	0	0	0	0	0	0	0	0	0	0	3	0	0	0	0	0	0	0	0	0	0	0	0	0	0	0	0	0
ERV316A3_Xq25b	0	0	1	0	0	0	0	0	0	0	0	0	0	2	0	0	0	0	0	0	0	1	0	1	1	0	0	0	0	0	0	16	0	0	0	0	0	0	0	0	0	0	0	0	1	0	0	0	0
ERV316A3_Xq25c	0	0	0	1	0	0	1	0	0	1	0	0	0	2	0	0	0	0	0	0	0	2	0	0	0	0	0	0	0	1	0	19	0	0	0	0	0	0	0	0	0	0	0	1	0	0	0	0	0
ERV316A3_Xq25d	1	0	0	0	0	0	0	1	0	0	0	0	0	0	0	0	0	0	0	0	0	0	0	0	0	2	0	0	0	1	0	19	0	0	0	0	0	0	0	0	0	0	0	0	0	0	0	0	0
ERV316A3_Xq26.1	27	49	51	31	136	41	32	44	60	32	13	64	47	67	60	32	37	61	58	46	56	52	85	88	66	65	59	64	82	326	51	27	104	38	100	61	44	46	104	48	74	24	62	40	60	39	23	93	69
ERV316A3_Xq26.2	0	0	0	0	0	0	0	0	0	0	0	0	0	0	0	0	0	0	0	0	0	0	0	0	0	0	0	0	0	0	0	39	0	0	0	1	0	0	0	0	0	0	0	0	0	0	0	0	0
ERV316A3_Xq26.3a	0	2	0	5	3	0	0	1	1	5	0	2	0	1	1	0	0	0	0	0	0	1	3	3	1	3	3	3	2	7	1	1	7	0	2	0	2	1	0	1	0	3	3	0	4	0	3	5	0
ERV316A3_Xq26.3b	0	0	0	0	0	0	0	0	0	0	0	0	0	0	0	0	0	0	0	0	0	0	1	0	0	0	0	0	0	0	0	17	0	0	0	0	0	0	0	0	0	0	0	0	0	0	0	0	0
ERV316A3_Xq26.3c	0	0	0	0	0	0	0	0	0	0	0	0	0	0	0	0	0	0	0	0	0	0	0	0	0	0	0	0	0	0	0	14	0	0	0	0	0	0	0	0	0	0	0	0	0	0	0	0	0
ERV316A3_Xq26.3d	0	0	0	0	0	0	0	0	0	0	0	0	0	0	0	0	0	0	0	0	0	0	1	0	0	0	0	0	0	0	0	5	0	0	0	0	0	0	0	0	0	0	0	0	0	0	0	0	0
ERV316A3_Xq27.1a	0	0	0	0	0	0	0	0	0	0	0	0	0	0	0	0	0	0	0	0	0	0	1	0	0	0	0	0	0	0	0	11	0	0	0	0	0	0	0	0	0	0	0	0	0	0	0	0	0
ERV316A3_Xq27.1b	0	0	0	0	0	0	0	0	0	0	0	0	0	0	0	0	0	0	0	0	0	0	1	0	0	0	0	0	0	0	0	12	0	0	0	0	0	0	0	0	0	0	0	0	0	0	0	0	0
ERV316A3_Xq27.1c	0	0	0	0	0	0	0	0	0	0	0	0	0	0	0	0	0	0	0	0	0	0	1	0	1	0	0	0	0	0	0	4	0	0	0	0	0	0	0	0	0	0	0	0	0	0	0	0	0
ERV316A3_Xq27.1d	0	0	0	0	0	0	0	0	0	0	0	0	0	0	0	0	0	0	0	0	0	0	0	0	0	0	0	0	0	0	0	4	0	0	0	0	0	0	0	0	0	0	0	0	0	0	0	0	0
ERV316A3_Xq27.1e	0	0	0	0	0	0	0	0	0	0	0	0	0	0	0	0	0	0	0	0	0	0	0	0	0	0	0	0	0	0	0	9	0	0	0	0	0	0	0	0	0	0	0	0	0	0	0	0	0
ERV316A3_Xq27.1f	0	0	0	0	0	0	0	0	0	0	0	0	0	0	0	0	0	0	0	0	0	0	0	0	0	0	0	0	0	0	0	21	0	0	0	0	0	0	0	0	0	0	0	0	0	0	0	0	0
ERV316A3_Xq27.2a	0	0	0	0	2	0	0	0	0	0	0	0	0	0	0	0	0	0	0	0	0	0	0	0	0	0	4	0	26	0	0	9	0	0	0	0	0	0	0	0	0	0	0	0	0	0	0	20	0
ERV316A3_Xq27.2b	0	0	0	0	0	0	2	1	0	0	0	0	0	0	0	0	0	0	0	0	0	0	2	2	0	0	0	1	0	5	1	5	0	0	0	0	0	0	1	0	0	0	3	0	0	0	1	1	0
ERV316A3_Xq27.2c	34	1	0	9	3	0	2	34	0	2	0	0	0	1	3	0	2	0	1	0	0	3	1	0	2	0	0	3	0	23	0	7	0	3	1	0	1	0	0	0	1	0	1	2	0	0	0	0	0
ERV316A3_Xq27.2d	0	0	0	0	0	0	0	0	0	0	0	0	0	0	0	0	0	0	0	0	0	0	0	0	0	0	0	0	0	0	0	15	0	0	0	0	0	0	0	0	1	0	0	0	0	0	0	0	0
ERV316A3_Xq27.3a	0	0	0	0	0	0	0	0	0	0	0	0	0	0	0	0	0	0	0	0	0	0	0	0	0	0	0	0	0	0	0	24	0	0	0	0	0	0	0	0	0	0	0	0	0	0	0	0	0
ERV316A3_Xq27.3b	0	0	0	0	0	0	0	0	0	0	0	0	0	0	0	0	0	0	0	0	0	0	1	0	0	0	0	0	0	0	0	1	0	0	0	0	0	0	0	0	0	0	0	0	0	0	0	0	0
ERV316A3_Xq27.3c	0	0	0	0	1	0	0	0	0	0	0	0	0	2	0	0	0	0	0	0	0	0	0	0	0	0	0	0	0	0	0	16	0	0	0	0	0	0	0	0	0	0	0	0	0	0	0	0	0
ERV316A3_Xq27.3d	0	0	0	0	0	0	0	0	0	0	0	0	0	0	0	0	0	0	0	0	0	0	0	0	0	0	0	0	0	0	0	15	0	0	0	0	0	0	0	0	0	0	0	0	0	0	0	0	0
ERV316A3_Xq27.3e	1	0	0	0	0	0	0	0	0	0	0	0	0	0	0	0	0	0	0	0	0	0	0	0	0	0	0	0	0	0	0	8	0	0	0	0	0	1	0	0	0	0	0	0	0	0	0	0	0
ERV316A3_Xq28a	0	0	0	0	0	0	0	0	0	0	0	0	0	0	0	0	2	0	0	0	0	0	0	0	0	0	0	0	0	0	0	24	0	0	0	0	0	0	0	0	0	0	0	0	0	0	0	0	0
ERV316A3_Xq28b	10	43	13	20	22	6	2	18	5	16	0	31	3	32	7	0	20	20	41	24	17	18	11	13	58	67	2	3	16	52	47	6	27	1	2	3	23	25	4	11	9	16	17	7	27	2	21	20	6
ERV316A3_Xq28c	0	0	0	0	0	0	0	0	0	0	0	0	0	0	0	0	0	0	0	0	0	0	0	0	0	0	0	0	0	0	0	0	0	0	0	0	0	0	0	0	0	0	0	0	0	0	0	0	0
ERV316A3_Xq28d	0	0	0	0	0	0	0	0	0	0	0	0	0	0	0	0	0	0	0	0	0	0	0	0	0	0	0	0	0	0	0	0	0	0	0	0	0	0	0	0	0	0	0	0	0	0	0	0	0
ERV316A3_Xq28e	0	0	0	0	0	0	0	0	0	0	0	0	0	0	0	0	0	0	0	0	0	0	0	0	0	0	0	0	0	0	0	1	0	0	0	0	0	0	0	0	0	0	0	0	0	0	0	0	0
ERV316A3_Xq28f	0	0	0	0	0	0	0	0	0	0	0	0	0	0	0	0	0	0	0	0	0	0	0	0	0	0	0	0	0	0	0	8	0	0	0	0	0	0	0	0	0	0	0	0	0	0	0	0	0
ERV316A3_Xq28g	0	0	0	0	0	0	0	0	0	0	0	0	0	0	0	0	0	0	0	0	0	0	0	0	0	0	0	0	0	0	0	2	0	0	0	0	0	0	0	0	0	0	0	0	0	0	0	0	0
ERV316A3_Xq28h	0	0	0	0	0	0	0	0	0	0	0	0	0	0	0	0	0	0	0	0	0	0	0	0	0	0	0	0	0	0	0	10	0	0	0	0	0	0	0	0	0	0	0	0	0	0	0	0	0
ERV316A3_Xq28i	2	0	2	0	1	2	0	2	0	3	0	13	2	3	0	0	1	0	0	0	4	1	0	2	10	1	0	1	0	0	7	29	3	0	0	1	1	6	0	1	0	1	5	0	5	0	7	4	2
ERV316A3_Xq28j	0	0	0	0	0	0	0	0	0	0	0	0	0	0	0	0	0	0	0	0	0	0	0	0	0	0	0	0	0	0	0	12	0	0	0	0	0	0	0	0	0	0	0	0	0	0	0	0	0
ERV316A3_Xq28k	0	0	0	0	1	0	1	0	0	0	0	0	0	0	0	0	0	0	0	1	0	0	0	0	0	0	0	0	0	0	0	10	0	0	0	0	0	1	0	0	2	0	0	1	1	0	0	0	0
ERV316A3_Xq28l	0	0	0	0	0	0	0	0	0	0	0	0	0	0	0	0	0	0	0	0	0	0	0	0	0	0	0	0	0	0	0	6	0	0	0	0	0	0	0	0	0	0	0	0	0	0	0	0	0
ERVL_10p14	0	4	1	0	2	0	4	1	0	2	0	0	0	5	1	0	0	1	2	2	1	1	2	3	1	0	1	0	4	4	2	5	9	0	0	1	1	0	4	0	0	0	1	0	0	0	2	4	0
ERVL_10p15.1	0	0	0	0	0	0	0	0	0	0	0	0	0	0	0	0	0	0	0	0	0	0	1	0	0	0	0	0	0	0	0	18	0	0	0	0	0	0	0	0	0	0	0	0	0	0	0	0	0
ERVL_10q11.22a	0	0	0	0	1	0	0	0	0	0	0	0	0	0	0	0	0	0	0	0	0	0	0	0	0	0	0	0	0	0	0	5	0	0	0	0	0	1	0	0	0	0	0	0	0	0	0	0	1
ERVL_10q11.22b	0	0	0	0	0	0	0	0	0	0	0	0	0	0	0	0	0	0	0	0	0	0	0	0	0	0	0	0	0	0	0	18	0	0	0	0	0	0	0	0	0	0	0	0	0	0	0	0	0
ERVL_10q21.2	4	1	2	0	0	0	7	6	1	0	0	0	0	1	0	0	0	1	0	0	6	0	1	2	0	0	0	10	0	5	0	36	6	0	0	0	0	1	1	2	0	0	2	5	0	1	0	0	1
ERVL_10q22.3	0	0	0	0	0	0	0	0	0	0	0	0	0	0	0	0	0	0	0	0	0	0	0	0	0	0	0	0	0	0	0	10	0	0	0	0	0	0	0	0	0	0	0	0	0	0	0	0	0
ERVL_10q23.31	0	0	0	0	0	0	0	0	0	0	0	0	0	0	0	0	0	0	0	0	0	0	0	1	0	0	0	0	0	1	0	43	0	0	0	0	0	0	0	0	0	0	0	0	0	0	0	0	0
ERVL_10q24.31	0	0	0	0	0	0	0	0	0	0	0	0	0	0	0	0	0	0	0	0	0	0	0	0	0	0	0	0	0	0	1	28	0	0	0	0	0	0	0	0	0	0	0	0	0	0	0	0	0
ERVL_10q25.1	0	0	0	0	0	0	0	0	0	0	0	0	0	0	0	0	0	0	0	0	0	0	0	0	0	0	0	0	0	0	0	9	0	0	0	0	0	0	0	0	0	0	0	0	0	0	0	0	0
ERVL_10q26.12	0	0	0	0	1	0	0	0	0	0	0	0	0	5	0	2	0	0	1	0	0	0	0	0	0	0	0	0	0	1	1	4	1	0	0	0	0	0	2	0	1	0	1	0	2	0	0	0	0
ERVL_11p14.1	0	1	0	1	1	0	0	0	2	0	0	1	0	0	0	0	3	1	0	0	0	0	3	1	0	2	0	0	1	0	0	53	1	2	2	0	0	3	2	0	0	0	0	4	1	0	0	0	0
ERVL_11p14.3	8	0	10	5	19	5	2	9	0	0	1	2	4	1	0	2	0	0	4	1	0	0	3	2	3	9	0	8	1	2	7	13	12	10	7	2	0	7	1	8	8	3	7	0	3	3	5	2	21
ERVL_11p15.5	0	0	0	0	0	0	0	0	0	0	0	0	0	0	0	0	0	1	0	0	0	0	0	0	0	0	0	0	0	0	1	48	0	0	0	0	0	0	0	0	0	0	0	0	0	0	0	0	0
ERVL_11q11	0	0	0	0	0	0	0	0	0	0	0	0	0	0	0	0	0	0	0	0	0	0	0	0	0	0	0	0	0	0	0	8	0	0	0	0	0	0	0	0	0	0	0	0	0	0	0	0	0
ERVL_11q12.1	0	0	0	0	0	0	0	1	0	0	0	0	0	1	0	0	0	1	0	1	0	0	4	2	0	0	0	0	0	1	0	55	0	0	0	0	0	0	0	0	0	0	1	0	1	0	0	1	0
ERVL_11q22.3	0	0	0	0	1	0	0	0	0	0	0	0	0	0	0	0	0	0	0	0	0	0	0	0	0	0	0	0	0	0	0	6	0	0	0	0	0	0	0	0	0	0	0	0	0	0	0	0	0
[truncated: 12,175 more rows]
[truncated: 496 more columns]
