# Supplementary material for: Transcriptome Analysis of Human Endogenous Retroviruses at Locus-Specific Resolution in Non-Small Cell Lung Cancer
Source: Cancers (Basel). 2022 Sep 13;14(18):4433. doi: 10.3390/cancers14184433 (PMC9497127; doi:10.3390/cancers14184433)
Supplement: Supplementary file 1 [file cancers-14-04433-s001.zip › File_S3.xlsx]

## Sheet: LUAD
patient_id	histological_type	age_at_diagnosis	diagnosis_days_to_last_follow_up	clinical_days_to_last_follow_up	days_to_death	vital_status	pathologic_stage	gender	race	ethnicity	year_of_birth	recurrent	days_to_recurrent	age_at_diagnosis_in_days	clinical_M	clinical_N	clinical_T	pathologic_M	pathologic_N	pathologic_T	days_to_psa	psa_value	eml4_alk_translocation_performed	day_of_form_completion	age_at_initial_pathologic_diagnosis	eml4_alk_translocation_method	eml4_alk_translocation_identified	eml4_alk_translocation_result	drug_name	measure_of_response	days_to_drug_therapy_start	days_to_drug_therapy_end	number_cycles	therapy_type_notes	therapy_type	kras_mutation_result	kras_mutation_found	egfr_mutation_performed	egfr_mutation_identified	egfr_mutation_result	tobacco_smoking_history	primary_therapy_outcome_success	year_of_tobacco_smoking_onset	number_pack_years_smoked	stopped_smoking_year	radiation_therapy	history_of_neoadjuvant_treatment	cigarettes_per_day	years_smoked
TCGA-78-7143	lung bronchioloalveolar carcinoma nonmucinous	22673	-1	-1	4961	dead	stage ib	female	white	not reported	1930	not reported	-1	22673	not reported	not reported	not reported	m0	n0	t2	not reported	not reported	no	-1	62	not reported	not reported	not reported	not reported	not reported	-1	-1	-1	not reported	not reported	not reported	not reported	no	not reported	not reported	1	not reported	-1	-1	-1	not reported	no	-1	-1
TCGA-97-A4M3	lung adenocarcinoma mixed subtype	25384	540	237	-1	alive	stage ia	female	white	not hispanic or latino	1943	yes	54	25384	not reported	not reported	not reported	m0	n0	t1b	not reported	not reported	no	-1	69	not reported	not reported	not reported	not reported	not reported	-1	-1	-1	not reported	not reported	not reported	no	no	not reported	not reported	3	complete remission/response	1959	37	1984	no	no	2.05479	25
TCGA-86-8073	lung bronchioloalveolar carcinoma nonmucinous	21214	740	13	-1	alive	stage ib	male	white	not hispanic or latino	1953	not reported	-1	21214	not reported	not reported	not reported	m0	n0	t2a	not reported	not reported	no	-1	58	not reported	not reported	not reported	not reported	not reported	-1	-1	-1	not reported	not reported	not reported	not reported	no	not reported	not reported	2	complete remission/response	1970	40	-1	not reported	no	2.19178	-1
TCGA-55-6712	lung adenocarcinoma- not otherwise specified (nos)	-1	24	24	171	dead	stage iia	male	white	not reported	1939	not reported	-1	-1	not reported	not reported	not reported	mx	n1	t2a	not reported	not reported	not reported	13	71	not reported	not reported	not reported	not reported	clinical progressive disease	55	164	-1	not reported	chemotherapy	not reported	not reported	not reported	not reported	not reported	4	not reported	1970	-1	2003	not reported	no	-1	33
TCGA-50-5932	lung adenocarcinoma- not otherwise specified (nos)	27454	1091	1091	1235	dead	stage iib	male	white	not hispanic or latino	1926	not reported	-1	27454	not reported	not reported	not reported	m0	n1	t2	not reported	not reported	not reported	-1	75	not reported	not reported	not reported	not reported	not reported	-1	-1	-1	not reported	not reported	not reported	not reported	not reported	not reported	not reported	-1	not reported	-1	-1	-1	not reported	no	-1	-1
TCGA-44-7662	lung adenocarcinoma- not otherwise specified (nos)	22543	218	50	-1	alive	stage ib	male	white	not hispanic or latino	1950	not reported	-1	22543	not reported	not reported	not reported	mx	n0	t2a	not reported	not reported	not reported	-1	61	not reported	not reported	not reported	not reported	not reported	-1	-1	-1	not reported	not reported	not reported	not reported	not reported	not reported	not reported	2	not reported	1961	50	-1	not reported	no	2.73973	-1
TCGA-73-7499	lung adenocarcinoma mixed subtype	29683	715	519	1531	dead	stage ib	female	white	not hispanic or latino	1929	no	-1	29683	not reported	not reported	not reported	m0	n0	t2a	not reported	not reported	no	-1	81	not reported	not reported	not reported	not reported	not reported	-1	-1	-1	not reported	not reported	not reported	not reported	no	not reported	not reported	1	complete remission/response	-1	-1	-1	no	no	-1	-1
TCGA-97-7552	lung bronchioloalveolar carcinoma mucinous	25578	1932	1476	-1	alive	stage ib	male	white	not hispanic or latino	1937	not reported	-1	25578	not reported	not reported	not reported	mx	n0	t2	not reported	not reported	not reported	-1	70	not reported	not reported	not reported	not reported	not reported	-1	-1	-1	not reported	not reported	not reported	not reported	not reported	not reported	not reported	3	not reported	-1	40	1985	not reported	no	2.19178	-1
TCGA-78-7150	lung adenocarcinoma- not otherwise specified (nos)	21891	-1	-1	666	dead	stage iib	male	white	not reported	1943	not reported	-1	21891	not reported	not reported	not reported	m0	n1	t2	not reported	not reported	no	28	59	not reported	not reported	not reported	not reported	not reported	285	397	5	not reported	chemotherapy	not reported	not reported	no	not reported	not reported	4	not reported	1963	37	2000	not reported	no	2.0274	37
TCGA-NJ-A4YQ	lung adenocarcinoma- not otherwise specified (nos)	25427	1432	886	-1	alive	stage ia	female	white	not hispanic or latino	1942	no	-1	25427	not reported	not reported	not reported	m0	n0	t1b	not reported	not reported	no	-1	69	not reported	not reported	not reported	not reported	not reported	-1	-1	-1	not reported	not reported	not reported	not reported	no	not reported	not reported	4	stable disease	-1	40	2011	no	no	2.19178	-1
TCGA-05-4432	lung adenocarcinoma mixed subtype	24350	761	761	-1	alive	stage iib	male	not reported	not reported	1942	not reported	-1	24350	not reported	not reported	not reported	m0	n1	t2	not reported	not reported	not reported	5	66	not reported	not reported	not reported	not reported	complete response	31	61	-1	not reported	chemotherapy	not reported	not reported	not reported	not reported	not reported	2	not reported	-1	58	-1	not reported	no	3.17808	-1
TCGA-69-7763	lung adenocarcinoma mixed subtype	25316	690	690	-1	alive	stage ia	male	white	not hispanic or latino	1941	not reported	-1	25316	not reported	not reported	not reported	m0	n0	t1b	not reported	not reported	no	-1	69	not reported	not reported	not reported	not reported	not reported	-1	-1	-1	not reported	not reported	not reported	not reported	no	not reported	not reported	4	not reported	1959	7	2004	not reported	no	0.410959	45
TCGA-67-3773	lung adenocarcinoma- not otherwise specified (nos)	30706	427	427	-1	alive	stage ib	female	white	not hispanic or latino	1925	not reported	-1	30706	not reported	not reported	not reported	m0	n0	t2	not reported	not reported	no	-1	84	not reported	not reported	not reported	not reported	not reported	-1	-1	-1	not reported	not reported	not reported	not reported	no	not reported	not reported	3	not reported	-1	-1	-1	not reported	no	-1	-1
TCGA-64-5778	lung bronchioloalveolar carcinoma nonmucinous	21927	1305	926	-1	alive	stage ib	male	white	not hispanic or latino	1948	not reported	-1	21927	not reported	not reported	not reported	m0	n0	t2	not reported	not reported	not reported	-1	60	not reported	not reported	not reported	not reported	not reported	-1	-1	-1	not reported	not reported	not reported	not reported	not reported	not reported	not reported	4	not reported	1966	68	2000	not reported	no	3.72603	34
TCGA-93-7348	lung adenocarcinoma- not otherwise specified (nos)	27456	531	127	-1	alive	stage ia	female	white	not hispanic or latino	1936	not reported	-1	27456	not reported	not reported	not reported	mx	n0	t1a	not reported	not reported	no	-1	75	not reported	not reported	not reported	not reported	not reported	-1	-1	-1	not reported	not reported	not reported	not reported	no	not reported	not reported	4	not reported	1957	42	1999	not reported	no	2.30137	42
TCGA-62-8398	lung adenocarcinoma mixed subtype	20197	-1	-1	444	dead	stage iiia	male	white	not hispanic or latino	1952	no	-1	20197	not reported	not reported	not reported	m0	n2	t2	not reported	not reported	no	21	55	not reported	not reported	not reported	not reported	complete response	41	113	-1	not reported	chemotherapy	not reported	not reported	no	not reported	not reported	4	complete remission/response	1970	20	1999	no	no	1.09589	29
TCGA-38-4628	lung adenocarcinoma- not otherwise specified (nos)	24057	-1	-1	1492	dead	stage iib	female	white	not hispanic or latino	1937	not reported	-1	24057	not reported	not reported	not reported	m0	n1	t2	not reported	not reported	no	14	65	not reported	not reported	not reported	not reported	not reported	1147	1238	4	not reported	chemotherapy	not reported	not reported	no	not reported	not reported	1	not reported	-1	-1	-1	not reported	no	-1	-1
TCGA-50-5933	lung adenocarcinoma- not otherwise specified (nos)	26377	2370	2370	2393	dead	stage iiib	male	white	not hispanic or latino	1929	not reported	-1	26377	not reported	not reported	not reported	m0	n2	t4	not reported	not reported	not reported	17	72	not reported	not reported	not reported	not reported	complete response	189	210	-1	not reported	chemotherapy	not reported	not reported	not reported	not reported	not reported	-1	not reported	-1	-1	-1	not reported	no	-1	-1
TCGA-44-6148	lung mucinous adenocarcinoma	22138	704	96	-1	alive	stage ia	male	white	not hispanic or latino	1951	not reported	-1	22138	not reported	not reported	not reported	m0	n0	t1b	not reported	not reported	not reported	-1	60	not reported	not reported	not reported	not reported	not reported	-1	-1	-1	not reported	not reported	not reported	no	not reported	not reported	not reported	3	not reported	1963	60	1994	not reported	no	3.28767	31
TCGA-95-7039	lung adenocarcinoma- not otherwise specified (nos)	19981	1272	34	-1	alive	stage iib	female	white	not hispanic or latino	1957	not reported	-1	19981	not reported	not reported	not reported	mx	n0	t3	not reported	not reported	not reported	-1	54	not reported	not reported	not reported	not reported	not reported	-1	-1	-1	not reported	not reported	not reported	not reported	not reported	not reported	not reported	2	not reported	-1	34	-1	not reported	no	1.86301	-1
TCGA-55-8621	lung adenocarcinoma- not otherwise specified (nos)	27485	515	106	-1	alive	stage ia	female	white	not hispanic or latino	1937	no	-1	27485	not reported	not reported	not reported	mx	n0	t1a	not reported	not reported	not reported	-1	75	not reported	not reported	not reported	not reported	not reported	-1	-1	-1	not reported	not reported	not reported	not reported	not reported	not reported	not reported	4	complete remission/response	1980	30	2010	no	no	1.64384	30
TCGA-44-8119	lung adenocarcinoma- not otherwise specified (nos)	27003	285	99	-1	alive	stage iib	male	white	not hispanic or latino	1939	no	-1	27003	not reported	not reported	not reported	m0	n0	t3	not reported	not reported	not reported	-1	73	not reported	not reported	not reported	not reported	not reported	-1	-1	-1	not reported	not reported	not reported	not reported	not reported	not reported	not reported	2	complete remission/response	1961	50	-1	no	no	2.73973	-1
TCGA-97-A4M7	lung adenocarcinoma mixed subtype	27062	629	271	-1	alive	stage ia	male	white	not hispanic or latino	1938	no	-1	27062	not reported	not reported	not reported	m0	n0	t1b	not reported	not reported	no	-1	74	not reported	not reported	not reported	not reported	not reported	-1	-1	-1	not reported	not reported	not reported	no	yes	not reported	l858r	3	complete remission/response	1958	40	1978	no	no	2.19178	20
TCGA-MP-A4SY	lung adenocarcinoma- not otherwise specified (nos)	22448	-1	-1	1501	dead	stage iib	male	white	not hispanic or latino	1941	yes	489	22448	not reported	not reported	not reported	m0	n1	t2	not reported	not reported	no	-1	61	not reported	not reported	not reported	not reported	not reported	-1	-1	-1	not reported	not reported	not reported	not reported	no	not reported	not reported	4	complete remission/response	-1	40	2002	no	no	2.19178	-1
TCGA-99-8028	lung adenocarcinoma- not otherwise specified (nos)	18542	1118	459	-1	alive	stage ia	female	black or african american	not hispanic or latino	1961	no	-1	18542	not reported	not reported	not reported	m0	n0	t1a	not reported	not reported	yes	-1	50	rt-pcr	not reported	not reported	not reported	not reported	-1	-1	-1	not reported	not reported	g12c	yes	yes	not reported	not reported	4	not reported	1981	30	2011	no	no	1.64384	30
TCGA-L9-A444	lung adenocarcinoma- not otherwise specified (nos)	22202	307	6	-1	alive	stage ia	female	white	not hispanic or latino	1952	no	-1	22202	not reported	not reported	not reported	mx	n0	t1a	not reported	not reported	no	-1	60	not reported	not reported	not reported	not reported	not reported	-1	-1	-1	not reported	not reported	not reported	not reported	no	not reported	not reported	2	complete remission/response	1972	10	-1	no	no	0.547945	-1
TCGA-95-7043	lung adenocarcinoma mixed subtype	23165	37	2	503	dead	stage ia	female	white	not hispanic or latino	1948	not reported	-1	23165	not reported	not reported	not reported	mx	n0	t1a	not reported	not reported	not reported	-1	63	not reported	not reported	not reported	not reported	not reported	-1	-1	-1	not reported	not reported	not reported	not reported	not reported	not reported	not reported	4	not reported	1964	40	2003	not reported	no	2.19178	39
TCGA-97-8171	lung papillary adenocarcinoma	29627	568	107	-1	alive	stage iv	male	asian	not hispanic or latino	1930	no	-1	29627	not reported	not reported	not reported	m1a	n2	t2a	not reported	not reported	no	-1	81	not reported	not reported	not reported	not reported	not reported	-1	-1	-1	not reported	not reported	not reported	no	yes	not reported	exon 19 deletion	2	progressive disease	1946	65	-1	not reported	no	3.56164	-1
TCGA-55-8619	mucinous (colloid) carcinoma	26616	416	49	-1	alive	stage iib	female	white	not hispanic or latino	1940	no	-1	26616	not reported	not reported	not reported	mx	n0	t3	not reported	not reported	not reported	-1	72	not reported	not reported	not reported	not reported	not reported	-1	-1	-1	not reported	not reported	not reported	not reported	not reported	not reported	not reported	1	complete remission/response	-1	-1	-1	no	no	-1	-1
TCGA-55-8203	lung adenocarcinoma- not otherwise specified (nos)	25477	547	4	-1	alive	stage ia	female	white	not hispanic or latino	1942	no	-1	25477	not reported	not reported	not reported	m0	n0	t1b	not reported	not reported	no	-1	69	not reported	not reported	not reported	not reported	not reported	-1	-1	-1	not reported	not reported	not reported	not reported	no	not reported	not reported	2	complete remission/response	-1	50	-1	not reported	no	2.73973	-1
TCGA-49-AARQ	lung adenocarcinoma- not otherwise specified (nos)	15065	6732	6443	-1	alive	stage i	female	black or african american	not hispanic or latino	1955	no	-1	15065	not reported	not reported	not reported	mx	n0	t2	not reported	not reported	not reported	-1	41	not reported	not reported	not reported	not reported	not reported	-1	-1	-1	not reported	not reported	not reported	not reported	not reported	not reported	not reported	4	complete remission/response	-1	60	2007	no	no	3.28767	-1
TCGA-86-7713	lung adenocarcinoma- not otherwise specified (nos)	25791	1157	7	-1	alive	stage iia	male	white	not hispanic or latino	1941	not reported	-1	25791	not reported	not reported	not reported	m0	n0	t2b	not reported	not reported	not reported	27	70	not reported	not reported	not reported	not reported	complete response	29	182	-1	not reported	chemotherapy	not reported	not reported	not reported	not reported	not reported	1	not reported	-1	-1	-1	not reported	no	-1	-1
TCGA-91-8497	lung adenocarcinoma- not otherwise specified (nos)	27632	174	174	434	dead	stage ia	female	white	not hispanic or latino	1937	no	-1	27632	not reported	not reported	not reported	mx	n0	t1a	not reported	not reported	not reported	-1	75	not reported	not reported	not reported	not reported	not reported	-1	-1	-1	not reported	not reported	not reported	not reported	not reported	not reported	not reported	1	not reported	-1	-1	-1	no	no	-1	-1
TCGA-55-8301	lung adenocarcinoma- not otherwise specified (nos)	21535	534	44	-1	alive	stage ib	male	white	not hispanic or latino	1954	no	-1	21535	not reported	not reported	not reported	mx	n0	t2a	not reported	not reported	not reported	30	58	not reported	not reported	not reported	not reported	partial response	261	-1	-1	not reported	chemotherapy	not reported	not reported	not reported	not reported	not reported	2	complete remission/response	1962	100	-1	no	no	5.47945	-1
TCGA-55-1594	lung adenocarcinoma- not otherwise specified (nos)	25008	1178	1178	-1	alive	stage iiia	male	white	not hispanic or latino	1937	not reported	-1	25008	not reported	not reported	not reported	m0	n2	t2	not reported	not reported	not reported	-1	68	not reported	not reported	not reported	not reported	not reported	-1	-1	-1	not reported	not reported	not reported	not reported	not reported	not reported	not reported	2	not reported	1965	-1	-1	not reported	no	-1	-1
TCGA-95-7567	lung adenocarcinoma mixed subtype	22437	568	163	-1	alive	stage iib	male	white	not hispanic or latino	1950	not reported	-1	22437	not reported	not reported	not reported	m0	n1	t2b	not reported	not reported	not reported	6	61	not reported	not reported	not reported	not reported	not reported	89	149	4	not reported	chemotherapy	not reported	not reported	not reported	not reported	not reported	4	not reported	1970	-1	2011	not reported	no	-1	41
TCGA-67-6215	lung adenocarcinoma- not otherwise specified (nos)	19310	174	162	-1	alive	stage ib	female	white	not hispanic or latino	1958	not reported	-1	19310	not reported	not reported	not reported	m0	n0	t2a	not reported	not reported	no	12	52	not reported	not reported	not reported	not reported	not reported	85	148	4	not reported	chemotherapy	not reported	not reported	no	not reported	not reported	1	not reported	-1	-1	-1	not reported	no	-1	-1
TCGA-97-7938	lung bronchioloalveolar carcinoma nonmucinous	27980	-1	-1	18	dead	stage ia	female	white	not hispanic or latino	1935	not reported	-1	27980	not reported	not reported	not reported	mx	n0	t1a	not reported	not reported	no	-1	76	not reported	not reported	not reported	not reported	not reported	-1	-1	-1	not reported	not reported	g12c	yes	yes	not reported	not reported	3	not reported	-1	40	1996	not reported	no	2.19178	-1
TCGA-49-AARE	lung adenocarcinoma- not otherwise specified (nos)	18893	-1	-1	1229	dead	stage ia	female	black or african american	not hispanic or latino	1948	yes	388	18893	not reported	not reported	not reported	mx	n0	t1	not reported	not reported	not reported	-1	51	not reported	not reported	not reported	not reported	not reported	-1	-1	-1	not reported	not reported	not reported	not reported	not reported	not reported	not reported	4	complete remission/response	1980	15	1995	no	no	0.821918	15
TCGA-86-8669	lung adenocarcinoma- not otherwise specified (nos)	23443	938	34	-1	alive	stage ia	male	white	not hispanic or latino	1948	not reported	-1	23443	not reported	not reported	not reported	m0	n0	t1b	not reported	not reported	not reported	2	64	not reported	not reported	not reported	not reported	complete response	854	938	-1	not reported	chemotherapy	not reported	not reported	not reported	not reported	not reported	2	not reported	1965	47	-1	not reported	no	2.57534	-1
TCGA-50-5068	lung adenocarcinoma- not otherwise specified (nos)	21728	1499	1499	1499	dead	stage iib	female	white	not hispanic or latino	1944	not reported	-1	21728	not reported	not reported	not reported	mx	n1	t2	not reported	not reported	not reported	-1	59	not reported	not reported	not reported	not reported	not reported	-1	-1	-1	not reported	not reported	not reported	not reported	not reported	not reported	not reported	-1	not reported	-1	-1	-1	not reported	no	-1	-1
TCGA-91-6835	lung adenocarcinoma- not otherwise specified (nos)	29887	79	35	-1	alive	stage ia	female	white	not hispanic or latino	1929	not reported	-1	29887	not reported	not reported	not reported	m0	n0	t1	not reported	not reported	not reported	-1	81	not reported	not reported	not reported	not reported	not reported	-1	-1	-1	not reported	not reported	not reported	not reported	no	not reported	not reported	3	not reported	-1	25	1976	not reported	no	1.36986	-1
TCGA-44-7669	lung adenocarcinoma- not otherwise specified (nos)	21893	-1	-1	574	dead	stage iia	male	black or african american	not hispanic or latino	1951	not reported	-1	21893	not reported	not reported	not reported	mx	n1	t1b	not reported	not reported	not reported	13	59	not reported	not reported	not reported	not reported	not reported	539	539	1	not reported	chemotherapy	not reported	not reported	not reported	not reported	not reported	2	not reported	1970	20	-1	not reported	no	1.09589	-1
TCGA-44-3918	lung adenocarcinoma- not otherwise specified (nos)	22236	1036	197	-1	alive	stage ia	female	white	not hispanic or latino	1950	not reported	-1	22236	not reported	not reported	not reported	m0	n0	t1	not reported	not reported	not reported	25	60	not reported	not reported	not reported	not reported	not reported	543	648	6	not reported	chemotherapy	not reported	not reported	not reported	not reported	not reported	3	not reported	1974	20	1994	not reported	no	1.09589	20
TCGA-49-AAR3	lung adenocarcinoma- not otherwise specified (nos)	25469	1893	1893	-1	alive	stage iib	male	black or african american	not hispanic or latino	1939	yes	1893	25469	not reported	not reported	not reported	mx	n1	t2	not reported	not reported	not reported	-1	69	not reported	not reported	not reported	not reported	not reported	-1	-1	-1	not reported	not reported	not reported	not reported	not reported	not reported	not reported	-1	complete remission/response	-1	-1	-1	no	no	-1	-1
TCGA-49-4514	lung papillary adenocarcinoma	28908	1700	1314	-1	alive	stage ia	female	white	not reported	1928	not reported	-1	28908	not reported	not reported	not reported	m0	n0	t1	not reported	not reported	not reported	-1	79	not reported	not reported	not reported	not reported	not reported	-1	-1	-1	not reported	not reported	not reported	not reported	not reported	not reported	not reported	3	not reported	-1	65	-1	not reported	no	3.56164	-1
TCGA-78-7220	lung adenocarcinoma mixed subtype	19480	-1	-1	807	dead	stage iiia	female	white	not reported	1947	not reported	-1	19480	not reported	not reported	not reported	m0	n2	t2	not reported	not reported	no	-1	53	not reported	not reported	not reported	not reported	not reported	-1	-1	-1	not reported	not reported	not reported	not reported	no	not reported	not reported	2	not reported	1965	35	-1	not reported	no	1.91781	-1
TCGA-67-3771	lung adenocarcinoma- not otherwise specified (nos)	28406	610	610	-1	alive	stage ia	female	black or african american	not hispanic or latino	1932	not reported	-1	28406	not reported	not reported	not reported	m0	n0	t1	not reported	not reported	no	-1	77	not reported	not reported	not reported	not reported	not reported	-1	-1	-1	not reported	not reported	not reported	not reported	no	not reported	not reported	4	not reported	-1	-1	-1	not reported	no	-1	-1
TCGA-05-4427	lung adenocarcinoma mixed subtype	23893	791	791	-1	alive	stage iib	female	not reported	not reported	1943	not reported	-1	23893	not reported	not reported	not reported	m0	n1	t2	not reported	not reported	not reported	5	65	not reported	not reported	not reported	not reported	complete response	61	122	-1	not reported	chemotherapy	not reported	not reported	not reported	not reported	not reported	4	not reported	1993	8	2008	not reported	no	0.438356	15
TCGA-97-7547	lung papillary adenocarcinoma	24737	1965	1435	-1	alive	stage ib	female	white	not hispanic or latino	1940	not reported	-1	24737	not reported	not reported	not reported	mx	n0	t2	not reported	not reported	not reported	6	67	not reported	not reported	not reported	not reported	not reported	33	89	1	not reported	chemotherapy	not reported	not reported	not reported	not reported	not reported	3	not reported	-1	30	1986	not reported	no	1.64384	-1
TCGA-62-A471	lung adenocarcinoma- not otherwise specified (nos)	23689	1246	883	-1	alive	stage iib	male	white	not hispanic or latino	1946	no	-1	23689	not reported	not reported	not reported	m0	n1	t2b	not reported	not reported	no	25	64	not reported	not reported	not reported	not reported	complete response	41	115	-1	not reported	chemotherapy	not reported	not reported	no	not reported	not reported	4	complete remission/response	-1	30	2006	no	no	1.64384	-1
TCGA-55-A490	lung adenocarcinoma- not otherwise specified (nos)	28728	48	48	99	dead	stage iia	male	white	not hispanic or latino	1934	no	-1	28728	not reported	not reported	not reported	mx	n0	t2b	not reported	not reported	yes	30	78	fish	not reported	not reported	not reported	not reported	89	89	-1	not reported	chemotherapy	g12c	yes	yes	not reported	not reported	3	not reported	1951	34	1985	not reported	no	1.86301	34
TCGA-49-AARR	lung adenocarcinoma- not otherwise specified (nos)	24942	4992	4630	-1	alive	stage ia	male	black or african american	not hispanic or latino	1933	yes	1099	24942	not reported	not reported	not reported	mx	n0	t1	not reported	not reported	not reported	-1	68	not reported	not reported	not reported	not reported	not reported	-1	-1	-1	not reported	not reported	not reported	not reported	not reported	not reported	not reported	3	complete remission/response	-1	-1	1987	no	no	-1	-1
TCGA-62-A470	lung acinar adenocarcinoma	30689	-1	-1	1194	dead	stage ib	male	white	not hispanic or latino	1925	yes	539	30689	not reported	not reported	not reported	m0	n0	t2	not reported	not reported	no	-1	84	not reported	not reported	not reported	not reported	not reported	-1	-1	-1	not reported	not reported	not reported	not reported	no	not reported	not reported	3	complete remission/response	-1	30	-1	no	no	1.64384	-1
TCGA-MP-A4TD	lung adenocarcinoma- not otherwise specified (nos)	25983	-1	-1	307	dead	stage iiia	male	white	not reported	1937	yes	226	25983	not reported	not reported	not reported	m0	n2	t2	not reported	not reported	no	18	71	not reported	not reported	not reported	not reported	complete response	75	165	-1	not reported	chemotherapy	not reported	not reported	no	not reported	not reported	3	complete remission/response	-1	20	1990	no	no	1.09589	-1
TCGA-55-7570	lung adenocarcinoma- not otherwise specified (nos)	22218	824	6	-1	alive	stage ia	male	black or african american	not hispanic or latino	1951	not reported	-1	22218	not reported	not reported	not reported	mx	n0	t1a	not reported	not reported	not reported	-1	60	not reported	not reported	not reported	not reported	not reported	-1	-1	-1	not reported	not reported	not reported	not reported	not reported	not reported	not reported	2	not reported	1971	-1	-1	not reported	no	-1	-1
TCGA-78-8640	lung adenocarcinoma- not otherwise specified (nos)	21832	7062	6346	-1	alive	stage iia	male	not reported	not reported	1935	no	-1	21832	not reported	not reported	not reported	m0	n1	t1	not reported	not reported	no	-1	59	not reported	not reported	not reported	not reported	not reported	-1	-1	-1	not reported	not reported	not reported	not reported	no	not reported	not reported	2	complete remission/response	1949	45	-1	no	no	2.46575	-1
TCGA-55-7911	lung adenocarcinoma- not otherwise specified (nos)	25746	537	21	-1	alive	stage ia	female	white	not hispanic or latino	1941	not reported	-1	25746	not reported	not reported	not reported	mx	n0	t1a	not reported	not reported	no	-1	70	not reported	not reported	not reported	not reported	not reported	-1	-1	-1	not reported	not reported	not reported	not reported	no	not reported	not reported	3	not reported	1959	96	1981	not reported	no	5.26027	22
TCGA-78-7537	lung adenocarcinoma mixed subtype	26610	-1	-1	1622	dead	stage ib	male	not reported	not reported	1930	not reported	-1	26610	not reported	not reported	not reported	m0	n0	t2	not reported	not reported	no	-1	72	not reported	not reported	not reported	not reported	not reported	-1	-1	-1	not reported	not reported	not reported	not reported	no	not reported	not reported	3	not reported	1944	20	1984	not reported	no	1.09589	40
TCGA-78-7633	lung adenocarcinoma mixed subtype	24713	994	994	1528	dead	stage ib	male	white	not reported	1942	not reported	-1	24713	not reported	not reported	not reported	m0	n0	t2	not reported	not reported	no	-1	67	not reported	not reported	not reported	not reported	not reported	-1	-1	-1	not reported	not reported	not reported	not reported	no	not reported	not reported	4	not reported	1955	94	2002	not reported	no	5.15068	47
TCGA-44-5643	lung adenocarcinoma- not otherwise specified (nos)	19426	1013	106	-1	alive	stage iiia	male	black or african american	not hispanic or latino	1957	not reported	-1	19426	not reported	not reported	not reported	m0	n2	t2b	not reported	not reported	not reported	14	53	not reported	not reported	not reported	not reported	not reported	131	208	8	not reported	chemotherapy	not reported	not reported	not reported	not reported	not reported	2	not reported	-1	20	-1	not reported	no	1.09589	-1
TCGA-71-6725	lung papillary adenocarcinoma	17793	256	61	-1	alive	stage ib	female	asian	not hispanic or latino	1963	not reported	-1	17793	not reported	not reported	not reported	m0	n0	t2	not reported	not reported	not reported	10	48	not reported	not reported	not reported	not reported	clinical progressive disease	107	127	-1	not reported	chemotherapy	not reported	not reported	not reported	not reported	not reported	2	not reported	-1	-1	-1	not reported	no	-1	-1
TCGA-55-8089	lung adenocarcinoma- not otherwise specified (nos)	20576	100	100	702	dead	stage ia	male	white	not hispanic or latino	1955	no	-1	20576	not reported	not reported	not reported	m0	n0	t1a	not reported	not reported	yes	-1	56	not reported	not reported	not reported	not reported	not reported	-1	-1	-1	not reported	not reported	not reported	no	yes	not reported	not reported	2	not reported	1973	97	-1	not reported	no	5.31507	-1
TCGA-49-4505	lung adenocarcinoma- not otherwise specified (nos)	22628	-1	-1	428	dead	stage iib	female	white	not hispanic or latino	1935	not reported	-1	22628	not reported	not reported	not reported	m0	n1	t2	not reported	not reported	not reported	-1	61	not reported	not reported	not reported	not reported	not reported	-1	-1	-1	not reported	not reported	not reported	not reported	not reported	not reported	not reported	4	not reported	1949	74	1986	not reported	no	4.05479	37
TCGA-55-1592	lung adenocarcinoma- not otherwise specified (nos)	-1	-1	-1	701	dead	stage ia	male	white	not hispanic or latino	1940	not reported	-1	-1	not reported	not reported	not reported	m0	n0	t2	not reported	not reported	not reported	-1	65	not reported	not reported	not reported	not reported	not reported	-1	-1	-1	not reported	not reported	not reported	not reported	not reported	not reported	not reported	4	not reported	1957	-1	1997	not reported	no	-1	40
TCGA-05-4384	lung adenocarcinoma mixed subtype	24411	426	426	-1	alive	stage iiia	male	not reported	not reported	1943	not reported	-1	24411	not reported	not reported	not reported	m0	n2	t2	not reported	not reported	not reported	5	66	not reported	not reported	not reported	not reported	clinical progressive disease	245	426	-1	not reported	ancillary	not reported	not reported	not reported	not reported	not reported	3	not reported	1963	20	1987	not reported	no	1.09589	24
TCGA-97-A4M2	lung adenocarcinoma mixed subtype	24313	624	197	-1	alive	stage ia	male	white	not hispanic or latino	1946	no	-1	24313	not reported	not reported	not reported	m0	n0	t1a	not reported	not reported	no	-1	66	not reported	not reported	not reported	not reported	not reported	-1	-1	-1	not reported	not reported	not reported	no	no	not reported	not reported	2	complete remission/response	1972	100	-1	no	no	5.47945	-1
TCGA-49-AAR0	lung adenocarcinoma- not otherwise specified (nos)	20932	4765	4415	-1	alive	stage ia	male	black or african american	not hispanic or latino	1945	no	-1	20932	not reported	not reported	not reported	mx	n0	t1	not reported	not reported	not reported	-1	57	not reported	not reported	not reported	not reported	not reported	-1	-1	-1	not reported	not reported	not reported	not reported	not reported	not reported	not reported	2	complete remission/response	-1	37	-1	no	no	2.0274	-1
TCGA-L9-A7SV	lung adenocarcinoma- not otherwise specified (nos)	25298	565	111	-1	alive	stage iia	male	black or african american	not hispanic or latino	1944	no	-1	25298	not reported	not reported	not reported	m0	n1	t2a	not reported	not reported	no	7	69	not reported	not reported	not reported	not reported	complete response	41	104	-1	not reported	chemotherapy	not reported	not reported	no	not reported	not reported	3	complete remission/response	1959	93	1990	no	no	5.09589	31
TCGA-44-6775	lung adenocarcinoma- not otherwise specified (nos)	26415	705	83	-1	alive	stage ib	female	white	hispanic or latino	1939	not reported	-1	26415	not reported	not reported	not reported	mx	n0	t2a	not reported	not reported	not reported	-1	72	not reported	not reported	not reported	not reported	not reported	-1	-1	-1	not reported	not reported	not reported	not reported	not reported	not reported	not reported	4	not reported	1955	25	2005	not reported	no	1.36986	50
TCGA-55-8616	lung adenocarcinoma- not otherwise specified (nos)	21225	48	48	-1	alive	stage ib	female	white	not hispanic or latino	1954	no	-1	21225	not reported	not reported	not reported	m0	n0	t2a	not reported	not reported	not reported	-1	58	not reported	not reported	not reported	not reported	not reported	-1	-1	-1	not reported	not reported	not reported	not reported	not reported	not reported	not reported	4	not reported	-1	-1	1999	not reported	no	-1	-1
TCGA-67-3770	lung adenocarcinoma- not otherwise specified (nos)	25658	610	610	-1	alive	stage ia	female	white	not hispanic or latino	1939	not reported	-1	25658	not reported	not reported	not reported	m0	n0	t1	not reported	not reported	no	-1	70	not reported	not reported	not reported	not reported	not reported	-1	-1	-1	not reported	not reported	not reported	not reported	no	not reported	not reported	3	not reported	-1	-1	-1	not reported	no	-1	-1
TCGA-MP-A4TC	lung adenocarcinoma- not otherwise specified (nos)	28471	-1	-1	74	dead	stage iiia	male	white	not hispanic or latino	1931	no	-1	28471	not reported	not reported	not reported	m0	n2	t1	not reported	not reported	no	18	77	not reported	not reported	not reported	not reported	complete response	25	25	-1	not reported	chemotherapy	not reported	not reported	no	not reported	not reported	3	complete remission/response	1944	125	1976	no	no	6.84932	32
TCGA-50-5941	lung adenocarcinoma- not otherwise specified (nos)	20350	1474	285	-1	alive	stage iiia	female	white	not reported	1955	not reported	-1	20350	not reported	not reported	not reported	m0	n2	t2a	not reported	not reported	not reported	17	55	not reported	not reported	not reported	not reported	complete response	-1	-1	-1	not reported	chemotherapy	not reported	not reported	not reported	not reported	not reported	2	not reported	-1	25	-1	not reported	no	1.36986	-1
TCGA-L9-A8F4	lung adenocarcinoma- not otherwise specified (nos)	23617	476	102	-1	alive	stage ib	female	black or african american	not hispanic or latino	1949	no	-1	23617	not reported	not reported	not reported	mx	n0	t2a	not reported	not reported	no	-1	64	not reported	not reported	not reported	not reported	not reported	-1	-1	-1	not reported	not reported	not reported	not reported	no	not reported	not reported	2	not reported	1973	14	-1	yes	no	0.767123	-1
TCGA-75-7031	lung adenocarcinoma- not otherwise specified (nos)	-1	-1	-1	-1	alive	stage ib	female	not reported	not reported	-1	not reported	-1	-1	not reported	not reported	not reported	m0	n0	t2	not reported	not reported	not reported	-1	-1	not reported	not reported	not reported	not reported	not reported	-1	-1	-1	not reported	not reported	not reported	not reported	not reported	not reported	not reported	3	not reported	1965	5	1975	not reported	no	0.273973	10
TCGA-49-4494	lung adenocarcinoma- not otherwise specified (nos)	28387	-1	-1	1081	dead	stage iiia	male	white	not hispanic or latino	1918	not reported	-1	28387	not reported	not reported	not reported	m0	n2	t3	not reported	not reported	not reported	-1	77	not reported	not reported	not reported	not reported	not reported	-1	-1	-1	not reported	not reported	not reported	not reported	not reported	not reported	not reported	3	not reported	1930	50	1955	not reported	no	2.73973	25
TCGA-80-5608	lung adenocarcinoma- not otherwise specified (nos)	-1	2832	-1	-1	alive	stage ia	female	not reported	not reported	-1	not reported	-1	-1	not reported	not reported	not reported	m0	n0	t1	not reported	not reported	not reported	-1	-1	not reported	not reported	not reported	not reported	not reported	-1	-1	-1	not reported	not reported	not reported	not reported	not reported	not reported	not reported	2	not reported	1972	26	-1	not reported	no	1.42466	-1
TCGA-86-8280	lung bronchioloalveolar carcinoma nonmucinous	19977	701	16	-1	alive	stage iia	female	white	not hispanic or latino	1957	no	-1	19977	not reported	not reported	not reported	m0	n0	t2b	not reported	not reported	not reported	2	54	not reported	not reported	not reported	not reported	complete response	16	129	-1	not reported	chemotherapy	not reported	not reported	not reported	not reported	not reported	1	complete remission/response	-1	-1	-1	not reported	no	-1	-1
TCGA-69-A59K	lung adenocarcinoma mixed subtype	22093	522	214	-1	alive	stage iib	female	black or african american	not hispanic or latino	1952	no	-1	22093	not reported	not reported	not reported	m0	n0	t3	not reported	not reported	no	18	60	not reported	not reported	not reported	not reported	stable disease	72	135	-1	not reported	chemotherapy	not reported	not reported	yes	not reported	not reported	4	stable disease	1999	25	2012	no	no	1.36986	13
TCGA-55-6982	lung adenocarcinoma- not otherwise specified (nos)	-1	-1	-1	995	dead	stage iib	female	white	not reported	1925	not reported	-1	-1	not reported	not reported	not reported	m0	n1	t2	not reported	not reported	no	13	79	not reported	not reported	not reported	not reported	clinical progressive disease	698	939	-1	not reported	chemotherapy	not reported	not reported	no	not reported	not reported	1	not reported	-1	-1	-1	not reported	no	-1	-1
TCGA-75-5147	lung adenocarcinoma- not otherwise specified (nos)	-1	1333	-1	-1	alive	stage ib	female	not reported	not reported	-1	not reported	-1	-1	not reported	not reported	not reported	m0	n0	t2	not reported	not reported	no	-1	-1	not reported	not reported	not reported	not reported	not reported	-1	-1	-1	not reported	not reported	not reported	not reported	no	not reported	not reported	1	not reported	-1	-1	-1	not reported	no	-1	-1
TCGA-93-A4JN	lung acinar adenocarcinoma	26273	718	382	-1	alive	stage iv	male	white	not hispanic or latino	1941	no	-1	26273	not reported	not reported	not reported	m1a	n0	t2a	not reported	not reported	yes	28	71	fish	not reported	not reported	not reported	stable disease	410	697	-1	not reported	chemotherapy	not reported	no	yes	not reported	not reported	3	stable disease	1971	40	1991	no	no	2.19178	20
TCGA-64-1678	lung adenocarcinoma- not otherwise specified (nos)	25931	1189	1189	-1	alive	not reported	female	white	not hispanic or latino	1936	not reported	-1	25931	not reported	not reported	not reported	m0	n0	t2b	not reported	not reported	not reported	15	70	not reported	not reported	not reported	not reported	not reported	69	132	4	not reported	chemotherapy	not reported	not reported	not reported	not reported	not reported	3	not reported	1970	20	1990	not reported	no	1.09589	20
TCGA-55-8514	lung adenocarcinoma- not otherwise specified (nos)	25608	520	202	-1	alive	stage ib	female	black or african american	not hispanic or latino	1942	no	-1	25608	not reported	not reported	not reported	mx	n0	t2a	not reported	not reported	not reported	-1	70	not reported	not reported	not reported	not reported	not reported	-1	-1	-1	not reported	not reported	not reported	not reported	not reported	not reported	not reported	4	complete remission/response	1971	20	2011	no	no	1.09589	40
TCGA-91-6836	lung adenocarcinoma- not otherwise specified (nos)	19216	417	11	-1	alive	stage ib	female	white	not hispanic or latino	1958	not reported	-1	19216	not reported	not reported	not reported	mx	n0	t2	not reported	not reported	not reported	-1	52	not reported	not reported	not reported	not reported	not reported	-1	-1	-1	not reported	not reported	not reported	not reported	no	not reported	not reported	2	not reported	1973	50	-1	not reported	no	2.73973	-1
TCGA-55-7815	lung adenocarcinoma- not otherwise specified (nos)	28119	773	54	-1	alive	stage ib	male	not reported	not reported	1935	not reported	-1	28119	not reported	not reported	not reported	mx	n0	t2a	not reported	not reported	not reported	30	76	not reported	not reported	not reported	not reported	not reported	706	-1	-1	not reported	chemotherapy	not reported	not reported	not reported	not reported	not reported	1	not reported	-1	-1	-1	not reported	no	-1	-1
TCGA-49-AARO	lung papillary adenocarcinoma	14527	3759	3755	-1	alive	stage ia	female	black or african american	not hispanic or latino	1964	yes	1144	14527	not reported	not reported	not reported	mx	n0	t1a	not reported	not reported	not reported	-1	39	not reported	not reported	not reported	not reported	not reported	-1	-1	-1	not reported	not reported	not reported	not reported	not reported	not reported	not reported	2	complete remission/response	-1	-1	-1	no	no	-1	-1
TCGA-73-4658	lung adenocarcinoma- not otherwise specified (nos)	29508	1600	1600	1600	dead	stage ib	female	white	not hispanic or latino	1924	not reported	-1	29508	not reported	not reported	not reported	m0	n0	t2	not reported	not reported	not reported	-1	80	not reported	not reported	not reported	not reported	not reported	-1	-1	-1	not reported	not reported	not reported	not reported	no	not reported	not reported	3	not reported	-1	25	-1	not reported	no	1.36986	-1
TCGA-4B-A93V	lung adenocarcinoma mixed subtype	19035	254	254	300	dead	stage ia	female	black or african american	not hispanic or latino	1961	yes	251	19035	not reported	not reported	not reported	m0	n0	t1b	not reported	not reported	not reported	-1	52	not reported	not reported	not reported	not reported	not reported	-1	-1	-1	not reported	not reported	not reported	not reported	not reported	not reported	not reported	4	progressive disease	1984	30	2013	yes	no	1.64384	29
TCGA-50-5044	lung adenocarcinoma- not otherwise specified (nos)	26567	-1	-1	624	dead	stage iiib	female	white	not hispanic or latino	1930	not reported	-1	26567	not reported	not reported	not reported	m0	n1	t4	not reported	not reported	not reported	-1	72	not reported	not reported	not reported	not reported	not reported	-1	-1	-1	not reported	not reported	not reported	not reported	not reported	not reported	not reported	-1	not reported	-1	-1	-1	not reported	no	-1	-1
TCGA-05-4424	lung adenocarcinoma mixed subtype	25689	913	913	-1	alive	stage iib	male	not reported	not reported	1938	not reported	-1	25689	not reported	not reported	not reported	m0	n0	t3	not reported	not reported	not reported	-1	70	not reported	not reported	not reported	not reported	not reported	-1	-1	-1	not reported	not reported	not reported	not reported	not reported	not reported	not reported	4	not reported	1957	50	2007	not reported	no	2.73973	50
TCGA-J2-8194	lung adenocarcinoma mixed subtype	25441	724	114	-1	alive	stage iib	female	white	not hispanic or latino	1942	no	-1	25441	not reported	not reported	not reported	mx	n0	t3	not reported	not reported	not reported	7	69	not reported	not reported	not reported	not reported	not reported	663	-1	-1	not reported	targeted molecular therapy	not reported	not reported	not reported	not reported	not reported	3	not reported	1956	20	1982	no	no	1.09589	26
TCGA-97-7553	lung bronchioloalveolar carcinoma nonmucinous	21518	1870	1332	-1	alive	stage ia	female	white	not hispanic or latino	1949	not reported	-1	21518	not reported	not reported	not reported	mx	n0	t1	not reported	not reported	not reported	-1	58	not reported	not reported	not reported	not reported	not reported	-1	-1	-1	not reported	not reported	not reported	not reported	not reported	not reported	not reported	2	not reported	1967	20	-1	not reported	no	1.09589	-1
TCGA-97-A4M5	lung adenocarcinoma mixed subtype	30665	634	132	-1	alive	stage ia	male	white	not hispanic or latino	1929	no	-1	30665	not reported	not reported	not reported	m0	n0	t1b	not reported	not reported	no	-1	83	not reported	not reported	not reported	not reported	not reported	-1	-1	-1	not reported	not reported	g12c	yes	no	not reported	not reported	3	complete remission/response	1952	6	1982	no	no	0.328767	30
TCGA-44-7667	lung adenocarcinoma- not otherwise specified (nos)	18062	1097	557	-1	alive	stage iib	female	white	not hispanic or latino	1960	not reported	-1	18062	not reported	not reported	not reported	mx	n0	t3	not reported	not reported	not reported	-1	49	not reported	not reported	not reported	not reported	not reported	-1	-1	-1	not reported	not reported	not reported	not reported	not reported	not reported	not reported	2	not reported	1974	50	-1	not reported	no	2.73973	-1
TCGA-91-8499	lung adenocarcinoma- not otherwise specified (nos)	27853	36	36	-1	alive	stage ia	female	white	not hispanic or latino	1935	no	-1	27853	not reported	not reported	not reported	mx	n0	t1b	not reported	not reported	not reported	-1	76	not reported	not reported	not reported	not reported	not reported	-1	-1	-1	not reported	not reported	not reported	not reported	yes	not reported	not reported	2	not reported	1945	90	-1	no	no	4.93151	-1
TCGA-49-AAR9	lung adenocarcinoma- not otherwise specified (nos)	22510	-1	-1	260	dead	stage iib	male	black or african american	not hispanic or latino	1938	no	-1	22510	not reported	not reported	not reported	mx	n0	t3	not reported	not reported	not reported	-1	61	not reported	not reported	not reported	not reported	not reported	-1	-1	-1	not reported	not reported	not reported	not reported	not reported	not reported	not reported	2	progressive disease	-1	-1	-1	no	no	-1	-1
TCGA-49-4507	lung adenocarcinoma- not otherwise specified (nos)	26851	-1	-1	268	dead	stage iiia	female	white	not hispanic or latino	1924	not reported	-1	26851	not reported	not reported	not reported	m0	n1	t3	not reported	not reported	not reported	6	73	not reported	not reported	not reported	not reported	not reported	174	-1	-1	not reported	chemotherapy	not reported	not reported	not reported	not reported	not reported	4	not reported	-1	78	1991	not reported	no	4.27397	-1
TCGA-86-A456	lung papillary adenocarcinoma	28533	896	10	-1	alive	stage ia	female	asian	not hispanic or latino	1934	not reported	-1	28533	not reported	not reported	not reported	m0	n0	t1a	not reported	not reported	not reported	-1	78	not reported	not reported	not reported	not reported	not reported	-1	-1	-1	not reported	not reported	not reported	not reported	not reported	not reported	not reported	4	not reported	1974	-1	2009	not reported	no	-1	35
TCGA-55-A494	lung adenocarcinoma- not otherwise specified (nos)	22540	481	5	-1	alive	stage ib	female	white	not hispanic or latino	1951	no	-1	22540	not reported	not reported	not reported	mx	n0	t2a	not reported	not reported	yes	-1	61	fish	not reported	not reported	not reported	not reported	-1	-1	-1	not reported	not reported	g12d	yes	yes	not reported	not reported	3	not reported	1967	7	1980	not reported	no	0.383562	13
TCGA-44-7671	lung adenocarcinoma mixed subtype	23538	889	535	-1	alive	stage ib	male	black or african american	not hispanic or latino	1946	not reported	-1	23538	not reported	not reported	not reported	m0	n0	t2a	not reported	not reported	not reported	-1	64	not reported	not reported	not reported	not reported	not reported	-1	-1	-1	not reported	not reported	not reported	not reported	not reported	not reported	not reported	3	not reported	-1	-1	1995	not reported	no	-1	-1
TCGA-44-A4SU	lung adenocarcinoma- not otherwise specified (nos)	24820	76	76	409	dead	stage ia	female	white	not hispanic or latino	1945	no	-1	24820	not reported	not reported	not reported	mx	n0	t1a	not reported	not reported	not reported	-1	67	not reported	not reported	not reported	not reported	not reported	-1	-1	-1	not reported	not reported	not reported	not reported	not reported	not reported	not reported	4	complete remission/response	1961	50	2011	no	no	2.73973	50
TCGA-55-7910	lung adenocarcinoma- not otherwise specified (nos)	18289	1040	203	-1	alive	stage iia	female	black or african american	not hispanic or latino	1961	not reported	-1	18289	not reported	not reported	not reported	m0	n0	t2b	not reported	not reported	not reported	-1	50	not reported	not reported	not reported	not reported	not reported	-1	-1	-1	not reported	not reported	not reported	not reported	not reported	not reported	not reported	4	not reported	1996	15	2011	not reported	no	0.821918	15
TCGA-55-6981	lung adenocarcinoma- not otherwise specified (nos)	19497	-1	-1	1379	dead	stage iiia	female	white	not hispanic or latino	1952	not reported	-1	19497	not reported	not reported	not reported	m0	n2	t1	not reported	not reported	no	-1	53	not reported	not reported	not reported	not reported	not reported	-1	-1	-1	not reported	not reported	not reported	not reported	no	not reported	not reported	3	not reported	-1	-1	-1	not reported	no	-1	-1
TCGA-44-2662	lung adenocarcinoma- not otherwise specified (nos)	24014	1280	480	-1	alive	stage ib	male	white	not hispanic or latino	1944	not reported	-1	24014	not reported	not reported	not reported	m0	n0	t2	not reported	not reported	not reported	21	65	not reported	not reported	not reported	not reported	not reported	277	362	8	not reported	chemotherapy	not reported	not reported	not reported	not reported	not reported	3	not reported	1956	56	1984	not reported	no	3.06849	28
TCGA-86-A4D0	lung adenocarcinoma- not otherwise specified (nos)	17607	30	30	116	dead	stage iia	male	white	not hispanic or latino	1964	no	-1	17607	not reported	not reported	not reported	m0	n0	t2b	not reported	not reported	no	9	48	not reported	not reported	not reported	not reported	complete response	76	80	-1	not reported	chemotherapy	not reported	not reported	no	not reported	not reported	2	not reported	1983	-1	-1	not reported	no	-1	-1
TCGA-93-7347	lung adenocarcinoma mixed subtype	27949	683	297	-1	alive	stage ia	female	white	not hispanic or latino	1935	not reported	-1	27949	not reported	not reported	not reported	mx	n0	t1a	not reported	not reported	no	-1	76	not reported	not reported	not reported	not reported	not reported	-1	-1	-1	not reported	not reported	not reported	not reported	no	not reported	not reported	3	not reported	1952	11	1967	not reported	no	0.60274	15
TCGA-55-8510	lung adenocarcinoma- not otherwise specified (nos)	20410	539	228	-1	alive	stage ib	female	white	not hispanic or latino	1957	no	-1	20410	not reported	not reported	not reported	mx	n0	t2a	not reported	not reported	not reported	-1	55	not reported	not reported	not reported	not reported	not reported	-1	-1	-1	not reported	not reported	not reported	not reported	not reported	not reported	not reported	2	complete remission/response	-1	-1	-1	no	no	-1	-1
TCGA-49-4512	lung adenocarcinoma- not otherwise specified (nos)	25502	157	157	905	dead	stage iiia	female	white	not hispanic or latino	1938	not reported	-1	25502	not reported	not reported	not reported	mx	n2	t2	not reported	not reported	not reported	-1	69	not reported	not reported	not reported	not reported	not reported	-1	-1	-1	not reported	not reported	not reported	not reported	not reported	not reported	not reported	1	not reported	-1	-1	-1	not reported	no	-1	-1
TCGA-44-6774	lung adenocarcinoma- not otherwise specified (nos)	20462	658	166	-1	alive	stage iiia	female	white	not hispanic or latino	1955	not reported	-1	20462	not reported	not reported	not reported	m0	n2	t1	not reported	not reported	not reported	3	56	not reported	not reported	not reported	not reported	not reported	91	112	2	not reported	chemotherapy	not reported	not reported	not reported	not reported	not reported	2	not reported	1971	20	-1	not reported	no	1.09589	-1
TCGA-MP-A4SW	lung adenocarcinoma- not otherwise specified (nos)	19640	-1	-1	1778	dead	stage iib	male	white	not reported	1949	not reported	-1	19640	not reported	not reported	not reported	m0	n1	t2	not reported	not reported	no	-1	53	not reported	not reported	not reported	not reported	not reported	-1	-1	-1	not reported	not reported	not reported	not reported	no	not reported	not reported	3	complete remission/response	1967	15	1982	no	no	0.821918	15
TCGA-86-8674	lung papillary adenocarcinoma	18479	806	0	-1	alive	stage iia	male	white	not hispanic or latino	1962	no	-1	18479	not reported	not reported	not reported	m0	n1	t2a	not reported	not reported	not reported	9	50	not reported	not reported	not reported	not reported	clinical progressive disease	57	81	-1	not reported	chemotherapy	not reported	not reported	not reported	not reported	not reported	4	complete remission/response	1982	37	2012	not reported	no	2.05479	30
TCGA-69-8253	lung adenocarcinoma mixed subtype	21771	426	100	-1	alive	stage iia	female	black or african american	not hispanic or latino	1953	no	-1	21771	not reported	not reported	not reported	mx	n1	t1a	not reported	not reported	no	1	59	not reported	not reported	not reported	not reported	not reported	55	-1	-1	not reported	chemotherapy	not reported	not reported	no	not reported	not reported	4	not reported	1972	7	2011	no	no	0.427397	39
TCGA-L9-A50W	lung adenocarcinoma mixed subtype	27414	266	266	442	dead	stage iia	male	black or african american	not hispanic or latino	1937	no	-1	27414	not reported	not reported	not reported	mx	n1	t1b	not reported	not reported	yes	-1	75	fish	not reported	not reported	not reported	not reported	-1	-1	-1	not reported	not reported	not reported	not reported	yes	not reported	t790m	3	complete remission/response	1967	19	1986	no	no	1.0411	19
TCGA-55-6987	lung adenocarcinoma- not otherwise specified (nos)	28382	2137	1170	-1	alive	stage ia	male	white	not hispanic or latino	1929	not reported	-1	28382	not reported	not reported	not reported	m0	n0	t1	not reported	not reported	no	-1	77	not reported	not reported	not reported	not reported	not reported	-1	-1	-1	not reported	not reported	not reported	not reported	no	not reported	not reported	4	not reported	-1	-1	2006	not reported	no	-1	-1
TCGA-53-7813	lung bronchioloalveolar carcinoma nonmucinous	18875	424	418	-1	alive	stage iiib	female	white	not hispanic or latino	1957	not reported	-1	18875	not reported	not reported	not reported	m0	n0	t4	not reported	not reported	no	11	51	not reported	not reported	not reported	not reported	stable disease	62	146	-1	not reported	chemotherapy	not reported	not reported	no	not reported	not reported	4	not reported	1973	35	2008	not reported	no	1.91781	35
TCGA-55-6968	lung adenocarcinoma- not otherwise specified (nos)	22344	-1	-1	1293	dead	stage iv	male	white	not hispanic or latino	1943	not reported	-1	22344	not reported	not reported	not reported	m1	n0	t1	not reported	not reported	not reported	-1	61	not reported	not reported	not reported	not reported	not reported	-1	-1	-1	not reported	not reported	not reported	not reported	not reported	not reported	not reported	2	not reported	-1	-1	-1	not reported	no	-1	-1
TCGA-49-6761	lung adenocarcinoma- not otherwise specified (nos)	24849	354	1	-1	alive	stage iiia	female	white	not hispanic or latino	1941	not reported	-1	24849	not reported	not reported	not reported	mx	n2	t1	not reported	not reported	not reported	-1	68	not reported	not reported	not reported	not reported	not reported	-1	-1	-1	not reported	not reported	not reported	not reported	not reported	not reported	not reported	4	not reported	-1	50	-1	not reported	no	2.73973	-1
TCGA-97-A4LX	lung adenocarcinoma mixed subtype	29915	614	272	-1	alive	stage ib	male	white	not hispanic or latino	1931	no	-1	29915	not reported	not reported	not reported	m0	n0	t2a	not reported	not reported	no	-1	81	not reported	not reported	not reported	not reported	not reported	-1	-1	-1	not reported	not reported	g12a	yes	no	not reported	not reported	3	complete remission/response	1945	120	1985	no	no	6.57534	40
TCGA-05-4398	lung adenocarcinoma mixed subtype	17471	1431	1431	-1	alive	stage iiib	female	not reported	not reported	1959	not reported	-1	17471	not reported	not reported	not reported	m0	n3	t4	not reported	not reported	not reported	5	47	not reported	not reported	not reported	not reported	complete response	0	92	-1	not reported	chemotherapy	not reported	not reported	not reported	not reported	not reported	2	not reported	-1	72	-1	not reported	no	3.94521	-1
TCGA-MP-A5C7	lung adenocarcinoma- not otherwise specified (nos)	28015	2248	1490	-1	alive	stage ib	female	white	not hispanic or latino	1932	no	-1	28015	not reported	not reported	not reported	m0	n0	t2	not reported	not reported	no	-1	76	not reported	not reported	not reported	not reported	not reported	-1	-1	-1	not reported	not reported	not reported	not reported	no	not reported	not reported	3	complete remission/response	1953	15	1968	no	no	0.821918	15
TCGA-50-6673	lung adenocarcinoma- not otherwise specified (nos)	30689	-1	-1	22	dead	stage i	female	white	not reported	1920	not reported	-1	30689	not reported	not reported	not reported	m0	n0	t1	not reported	not reported	not reported	-1	84	not reported	not reported	not reported	not reported	not reported	-1	-1	-1	not reported	not reported	not reported	not reported	not reported	not reported	not reported	1	not reported	-1	-1	-1	not reported	no	-1	-1
TCGA-50-6595	lung adenocarcinoma- not otherwise specified (nos)	27197	-1	-1	189	dead	stage iiia	female	white	not hispanic or latino	1935	not reported	-1	27197	not reported	not reported	not reported	m0	n2	t2	not reported	not reported	yes	-1	74	not reported	not reported	not reported	not reported	not reported	-1	-1	-1	not reported	not reported	not reported	not reported	yes	not reported	not reported	3	not reported	-1	-1	1979	not reported	no	-1	-1
TCGA-49-6744	lung adenocarcinoma mixed subtype	23484	1683	890	-1	alive	stage iia	female	white	not reported	1946	not reported	-1	23484	not reported	not reported	not reported	mx	n1	t2a	not reported	not reported	not reported	-1	64	not reported	not reported	not reported	not reported	not reported	-1	-1	-1	not reported	not reported	not reported	yes	not reported	not reported	not reported	4	not reported	-1	20	-1	not reported	no	1.09589	-1
TCGA-05-4396	lung adenocarcinoma mixed subtype	28094	-1	-1	303	dead	stage iiib	male	not reported	not reported	1930	not reported	-1	28094	not reported	not reported	not reported	m0	n1	t4	not reported	not reported	not reported	-1	76	not reported	not reported	not reported	not reported	not reported	-1	-1	-1	not reported	not reported	not reported	not reported	not reported	not reported	not reported	3	not reported	1947	19	1984	not reported	no	1.0411	37
TCGA-44-2656	lung adenocarcinoma- not otherwise specified (nos)	21766	1429	582	-1	alive	stage ib	male	white	not hispanic or latino	1950	not reported	-1	21766	not reported	not reported	not reported	m0	n0	t2	not reported	not reported	not reported	-1	59	not reported	not reported	not reported	not reported	not reported	-1	-1	-1	not reported	not reported	not reported	not reported	not reported	not reported	not reported	4	not reported	1994	23	2009	not reported	no	1.26027	15
TCGA-62-8397	lung adenocarcinoma mixed subtype	25728	1289	940	-1	alive	stage iib	female	white	not hispanic or latino	1938	no	-1	25728	not reported	not reported	not reported	m0	n0	t3	not reported	not reported	no	-1	70	not reported	not reported	not reported	not reported	not reported	-1	-1	-1	not reported	not reported	not reported	not reported	no	not reported	not reported	1	complete remission/response	-1	-1	-1	no	no	-1	-1
TCGA-S2-AA1A	lung bronchioloalveolar carcinoma mucinous	24903	513	121	-1	alive	stage ia	female	black or african american	not hispanic or latino	1945	no	-1	24903	not reported	not reported	not reported	m0	n0	t1b	not reported	not reported	no	-1	68	not reported	not reported	not reported	not reported	not reported	-1	-1	-1	not reported	not reported	not reported	not reported	no	not reported	not reported	3	complete remission/response	1957	95	1995	no	no	5.20548	38
TCGA-55-8505	lung adenocarcinoma- not otherwise specified (nos)	22676	440	29	-1	alive	stage iiia	male	white	not hispanic or latino	1950	no	-1	22676	not reported	not reported	not reported	mx	n2	t1a	not reported	not reported	not reported	28	62	not reported	not reported	not reported	not reported	complete response	96	159	-1	not reported	chemotherapy	not reported	not reported	not reported	not reported	not reported	1	complete remission/response	-1	-1	-1	not reported	no	-1	-1
TCGA-75-6211	lung adenocarcinoma- not otherwise specified (nos)	-1	-1	-1	-1	dead	stage ib	female	not reported	not reported	-1	not reported	-1	-1	not reported	not reported	not reported	m0	n0	t2	not reported	not reported	not reported	-1	-1	not reported	not reported	not reported	not reported	not reported	-1	-1	-1	not reported	not reported	not reported	not reported	not reported	not reported	not reported	2	not reported	-1	34	-1	not reported	no	1.86301	-1
TCGA-55-6970	lung papillary adenocarcinoma	24773	-1	-1	464	dead	stage iiia	female	white	not reported	1937	not reported	-1	24773	not reported	not reported	not reported	mx	n2	t2	not reported	not reported	no	28	67	not reported	not reported	not reported	not reported	stable disease	162	183	-1	not reported	chemotherapy	not reported	not reported	no	not reported	not reported	4	not reported	-1	-1	-1	not reported	no	-1	-1
TCGA-44-7670	lung adenocarcinoma- not otherwise specified (nos)	17392	882	531	-1	alive	stage iia	female	white	hispanic or latino	1963	not reported	-1	17392	not reported	not reported	not reported	m0	n1	t1b	not reported	not reported	not reported	19	47	not reported	not reported	not reported	not reported	not reported	88	165	4	not reported	chemotherapy	not reported	not reported	not reported	not reported	not reported	2	not reported	1980	30	-1	not reported	no	1.64384	-1
TCGA-78-7154	lung adenocarcinoma- not otherwise specified (nos)	26481	-1	-1	593	dead	stage iiia	male	white	not reported	1931	not reported	-1	26481	not reported	not reported	not reported	m0	n2	t3	not reported	not reported	no	-1	72	not reported	not reported	not reported	not reported	not reported	-1	-1	-1	not reported	not reported	not reported	not reported	no	not reported	not reported	4	not reported	1948	112	1993	not reported	no	6.16438	45
TCGA-55-6969	lung adenocarcinoma- not otherwise specified (nos)	19270	1239	1239	-1	alive	stage ib	male	white	not reported	1952	not reported	-1	19270	not reported	not reported	not reported	m0	n0	t2	not reported	not reported	no	-1	52	not reported	not reported	not reported	not reported	not reported	-1	-1	-1	not reported	not reported	not reported	not reported	no	not reported	not reported	4	not reported	-1	-1	2004	not reported	no	-1	-1
TCGA-91-6831	lung adenocarcinoma- not otherwise specified (nos)	24436	310	39	-1	alive	stage ib	male	white	not hispanic or latino	1935	not reported	-1	24436	not reported	not reported	not reported	mx	n0	t2	not reported	not reported	not reported	-1	66	not reported	not reported	not reported	not reported	not reported	-1	-1	-1	not reported	not reported	not reported	not reported	not reported	not reported	not reported	2	not reported	-1	-1	-1	not reported	no	-1	-1
TCGA-55-7573	lung adenocarcinoma- not otherwise specified (nos)	26302	487	4	-1	alive	stage ia	female	white	not hispanic or latino	1939	not reported	-1	26302	not reported	not reported	not reported	mx	n0	t1b	not reported	not reported	no	-1	72	not reported	not reported	not reported	not reported	not reported	-1	-1	-1	not reported	not reported	not reported	not reported	no	not reported	not reported	3	not reported	-1	-1	1983	not reported	no	-1	-1
TCGA-86-A4P8	lung adenocarcinoma- not otherwise specified (nos)	21738	805	39	-1	alive	stage iiia	female	white	not hispanic or latino	1953	not reported	-1	21738	not reported	not reported	not reported	mx	n2	t1b	not reported	not reported	yes	11	59	fish	not reported	not reported	not reported	complete response	43	106	-1	not reported	chemotherapy	not reported	not reported	yes	not reported	not reported	1	complete remission/response	-1	-1	-1	not reported	no	-1	-1
TCGA-78-7162	lung adenocarcinoma mixed subtype	27593	-1	-1	3169	dead	stage ia	male	white	not reported	1916	not reported	-1	27593	not reported	not reported	not reported	m0	n0	t1	not reported	not reported	no	-1	75	not reported	not reported	not reported	not reported	not reported	-1	-1	-1	not reported	not reported	not reported	not reported	no	not reported	not reported	2	not reported	1940	12	-1	not reported	no	0.657534	-1
TCGA-50-6590	lung adenocarcinoma- not otherwise specified (nos)	26444	-1	-1	1288	dead	stage ib	female	white	not hispanic or latino	1933	not reported	-1	26444	not reported	not reported	not reported	m0	n0	t2	not reported	not reported	not reported	4	72	not reported	not reported	not reported	not reported	complete response	92	189	-1	not reported	chemotherapy	not reported	not reported	yes	not reported	not reported	4	not reported	-1	50	2002	not reported	no	2.73973	-1
TCGA-55-6978	lung adenocarcinoma- not otherwise specified (nos)	-1	-1	-1	176	dead	stage iia	male	white	not hispanic or latino	1929	not reported	-1	-1	not reported	not reported	not reported	mx	n0	t2b	not reported	not reported	no	-1	81	not reported	not reported	not reported	not reported	not reported	-1	-1	-1	not reported	not reported	not reported	not reported	no	not reported	not reported	1	not reported	-1	-1	-1	not reported	no	-1	-1
TCGA-44-3396	lung adenocarcinoma- not otherwise specified (nos)	27073	1130	311	-1	alive	stage iiia	female	white	not hispanic or latino	1935	not reported	-1	27073	not reported	not reported	not reported	m0	n2	t2	not reported	not reported	not reported	22	74	not reported	not reported	not reported	not reported	not reported	129	192	4	not reported	chemotherapy	not reported	not reported	not reported	not reported	not reported	2	not reported	1959	50	-1	not reported	no	2.73973	-1
TCGA-MP-A4T2	lung adenocarcinoma- not otherwise specified (nos)	26010	-1	-1	1136	dead	stage ia	male	white	not hispanic or latino	1932	yes	575	26010	not reported	not reported	not reported	m0	n0	t1	not reported	not reported	no	-1	71	not reported	not reported	not reported	not reported	not reported	-1	-1	-1	not reported	not reported	not reported	not reported	no	not reported	not reported	4	complete remission/response	1951	75	2001	no	no	4.10959	50
TCGA-55-8507	lung adenocarcinoma- not otherwise specified (nos)	19390	418	8	-1	alive	stage ia	male	white	not hispanic or latino	1959	no	-1	19390	not reported	not reported	not reported	mx	n0	t1a	not reported	not reported	not reported	-1	53	not reported	not reported	not reported	not reported	not reported	-1	-1	-1	not reported	not reported	not reported	not reported	not reported	not reported	not reported	2	complete remission/response	1972	120	-1	no	no	6.57534	-1
TCGA-86-6562	lung adenocarcinoma- not otherwise specified (nos)	19301	0	0	376	dead	stage iia	male	white	not hispanic or latino	1959	not reported	-1	19301	not reported	not reported	not reported	m0	n1	t2a	not reported	not reported	not reported	28	52	not reported	not reported	not reported	not reported	not reported	27	253	4	not reported	chemotherapy	not reported	not reported	not reported	not reported	not reported	1	not reported	-1	-1	-1	not reported	no	-1	-1
TCGA-86-7701	lung adenocarcinoma- not otherwise specified (nos)	24209	947	11	-1	alive	stage iv	male	white	not hispanic or latino	1945	not reported	-1	24209	not reported	not reported	not reported	m1	n0	t2	not reported	not reported	not reported	9	66	not reported	not reported	not reported	not reported	not reported	936	-1	-1	not reported	chemotherapy	not reported	not reported	not reported	not reported	not reported	1	not reported	-1	-1	-1	not reported	no	-1	-1
TCGA-78-7540	lung bronchioloalveolar carcinoma mucinous	24440	881	881	1197	dead	stage ib	female	white	not reported	1933	not reported	-1	24440	not reported	not reported	not reported	m0	n0	t2	not reported	not reported	no	-1	66	not reported	not reported	not reported	not reported	not reported	-1	-1	-1	not reported	not reported	not reported	not reported	no	not reported	not reported	1	not reported	-1	-1	-1	not reported	no	-1	-1
TCGA-55-8094	lung adenocarcinoma- not otherwise specified (nos)	18903	541	4	-1	alive	stage iv	male	white	not hispanic or latino	1961	no	-1	18903	not reported	not reported	not reported	m1b	n0	t2b	not reported	not reported	yes	-1	51	fish	not reported	not reported	not reported	not reported	-1	-1	-1	not reported	not reported	not reported	not reported	yes	not reported	not reported	4	not reported	1976	70	2011	not reported	no	3.83562	35
TCGA-49-4506	lung adenocarcinoma- not otherwise specified (nos)	25132	-1	-1	999	dead	stage iib	female	white	not hispanic or latino	1929	not reported	-1	25132	not reported	not reported	not reported	m0	n1	t2	not reported	not reported	not reported	-1	68	not reported	not reported	not reported	not reported	not reported	-1	-1	-1	not reported	not reported	not reported	not reported	not reported	not reported	not reported	2	not reported	-1	100	-1	not reported	no	5.47945	-1
TCGA-NJ-A4YG	lung adenocarcinoma- not otherwise specified (nos)	23812	2261	1726	-1	alive	stage ib	male	white	not reported	1943	no	-1	23812	not reported	not reported	not reported	m0	n0	t2	not reported	not reported	not reported	-1	65	not reported	not reported	not reported	not reported	not reported	-1	-1	-1	not reported	not reported	not reported	not reported	not reported	not reported	not reported	4	not reported	1955	104	2007	no	no	5.69863	52
TCGA-55-A493	lung adenocarcinoma- not otherwise specified (nos)	20027	28	28	-1	alive	stage ib	female	white	not hispanic or latino	1958	no	-1	20027	not reported	not reported	not reported	m0	n0	t2a	not reported	not reported	no	-1	54	not reported	not reported	not reported	not reported	not reported	-1	-1	-1	not reported	not reported	not reported	not reported	no	not reported	not reported	2	not reported	1977	53	-1	not reported	no	2.90411	-1
TCGA-35-5375	lung adenocarcinoma- not otherwise specified (nos)	22628	264	264	-1	alive	stage iiia	male	white	not hispanic or latino	1949	not reported	-1	22628	not reported	not reported	not reported	m0	n2	t2	not reported	not reported	not reported	-1	61	not reported	not reported	not reported	not reported	not reported	-1	-1	-1	not reported	not reported	not reported	not reported	not reported	not reported	not reported	4	not reported	1971	35	2006	not reported	no	1.91781	35
TCGA-44-5645	lung adenocarcinoma- not otherwise specified (nos)	22471	852	208	-1	alive	stage ia	female	black or african american	not hispanic or latino	1949	not reported	-1	22471	not reported	not reported	not reported	not reported	nx	t1	not reported	not reported	not reported	-1	61	not reported	not reported	not reported	not reported	not reported	-1	-1	-1	not reported	not reported	not reported	not reported	not reported	not reported	not reported	3	not reported	1963	5	1973	not reported	no	0.273973	10
TCGA-55-8204	lung adenocarcinoma- not otherwise specified (nos)	31818	515	0	-1	alive	stage ib	female	white	not hispanic or latino	1924	no	-1	31818	not reported	not reported	not reported	mx	n0	t2a	not reported	not reported	not reported	-1	87	not reported	not reported	not reported	not reported	not reported	-1	-1	-1	not reported	not reported	not reported	not reported	not reported	not reported	not reported	3	not reported	-1	-1	-1	not reported	no	-1	-1
TCGA-64-5815	lung adenocarcinoma mixed subtype	27280	866	224	-1	alive	stage iib	male	white	not hispanic or latino	1935	not reported	-1	27280	not reported	not reported	not reported	m0	n1	t2	not reported	not reported	not reported	3	74	not reported	not reported	not reported	not reported	complete response	146	195	-1	not reported	chemotherapy	not reported	not reported	yes	not reported	not reported	3	not reported	-1	30	1985	not reported	no	1.64384	-1
TCGA-05-5428	lung adenocarcinoma mixed subtype	21061	670	0	-1	alive	stage iia	male	not reported	not reported	1953	not reported	-1	21061	not reported	not reported	not reported	m0	n1	t1b	not reported	not reported	not reported	5	57	not reported	not reported	not reported	not reported	complete response	62	153	-1	not reported	chemotherapy	not reported	not reported	not reported	not reported	not reported	3	not reported	1969	30	1993	not reported	no	1.64384	24
TCGA-83-5908	lung adenocarcinoma- not otherwise specified (nos)	21760	824	420	-1	alive	stage ia	female	white	not hispanic or latino	1950	not reported	-1	21760	not reported	not reported	not reported	m0	n0	t1	not reported	not reported	no	-1	59	not reported	not reported	not reported	not reported	not reported	-1	-1	-1	not reported	not reported	not reported	not reported	no	not reported	not reported	4	not reported	1962	69	2007	not reported	no	3.78082	45
TCGA-97-8552	lung bronchioloalveolar carcinoma nonmucinous	20331	626	115	-1	alive	stage i	female	white	not hispanic or latino	1957	no	-1	20331	not reported	not reported	not reported	mx	n0	t1a	not reported	not reported	no	-1	55	not reported	not reported	not reported	not reported	not reported	-1	-1	-1	not reported	not reported	not reported	no	yes	not reported	exon 19 deletion	1	complete remission/response	-1	-1	-1	no	no	-1	-1
TCGA-55-A57B	lung adenocarcinoma mixed subtype	29452	546	21	-1	alive	stage ia	female	black or african american	not hispanic or latino	1932	no	-1	29452	not reported	not reported	not reported	m0	n0	t1b	not reported	not reported	no	-1	80	not reported	not reported	not reported	not reported	not reported	-1	-1	-1	not reported	not reported	not reported	not reported	no	not reported	not reported	1	not reported	-1	-1	-1	not reported	no	-1	-1
TCGA-62-A46V	lung adenocarcinoma mixed subtype	28495	2199	1631	-1	alive	stage ib	female	white	not hispanic or latino	1929	no	-1	28495	not reported	not reported	not reported	m0	n0	t2	not reported	not reported	no	-1	78	not reported	not reported	not reported	not reported	not reported	-1	-1	-1	not reported	not reported	not reported	not reported	no	not reported	not reported	3	complete remission/response	-1	-1	-1	no	no	-1	-1
TCGA-69-7978	lung adenocarcinoma mixed subtype	21785	134	70	-1	alive	stage iib	male	white	not hispanic or latino	1952	not reported	-1	21785	not reported	not reported	not reported	mx	n1	t2b	not reported	not reported	not reported	-1	59	not reported	not reported	not reported	not reported	not reported	-1	-1	-1	not reported	not reported	not reported	not reported	yes	not reported	other	2	not reported	-1	80	-1	not reported	no	4.38356	-1
TCGA-MP-A4TA	lung adenocarcinoma- not otherwise specified (nos)	27513	-1	-1	950	dead	stage ia	female	white	not hispanic or latino	1931	yes	725	27513	not reported	not reported	not reported	m0	n0	t1	not reported	not reported	no	-1	75	not reported	not reported	not reported	not reported	not reported	-1	-1	-1	not reported	not reported	not reported	not reported	no	not reported	not reported	4	complete remission/response	1951	55	2006	no	no	3.0137	55
TCGA-50-8459	mucinous (colloid) carcinoma	24859	1119	231	-1	alive	stage iib	male	white	not hispanic or latino	1944	no	-1	24859	not reported	not reported	not reported	m0	n0	t3	not reported	not reported	not reported	26	68	not reported	not reported	not reported	not reported	complete response	76	147	-1	not reported	chemotherapy	g12c	yes	yes	not reported	not reported	2	progressive disease	-1	10	-1	no	no	0.547945	-1
TCGA-95-7944	lung adenocarcinoma- not otherwise specified (nos)	26003	377	21	-1	alive	stage ia	male	white	not hispanic or latino	1940	not reported	-1	26003	not reported	not reported	not reported	m0	n0	t1a	not reported	not reported	not reported	-1	71	not reported	not reported	not reported	not reported	not reported	-1	-1	-1	not reported	not reported	not reported	not reported	not reported	not reported	not reported	2	not reported	1961	50	-1	not reported	no	2.73973	-1
TCGA-55-6979	lung adenocarcinoma- not otherwise specified (nos)	21780	-1	-1	237	dead	stage iib	female	white	not reported	1947	not reported	-1	21780	not reported	not reported	not reported	m0	n1	t2	not reported	not reported	no	22	59	not reported	not reported	not reported	not reported	clinical progressive disease	57	149	-1	not reported	chemotherapy	not reported	not reported	no	not reported	not reported	3	not reported	-1	-1	-1	not reported	no	-1	-1
TCGA-55-6983	mucinous (colloid) carcinoma	-1	2823	1826	-1	alive	stage iib	male	white	not hispanic or latino	1924	not reported	-1	-1	not reported	not reported	not reported	m0	n1	t2	not reported	not reported	no	-1	81	not reported	not reported	not reported	not reported	not reported	-1	-1	-1	not reported	not reported	not reported	not reported	no	not reported	not reported	4	not reported	-1	60	-1	not reported	no	3.28767	-1
TCGA-55-A492	lung adenocarcinoma- not otherwise specified (nos)	25719	596	1	-1	alive	stage ia	female	white	not hispanic or latino	1942	no	-1	25719	not reported	not reported	not reported	mx	n0	t1a	not reported	not reported	no	-1	70	not reported	not reported	not reported	not reported	not reported	-1	-1	-1	not reported	not reported	not reported	not reported	no	not reported	not reported	3	not reported	1962	35	1995	not reported	no	1.91781	33
TCGA-62-A46P	lung adenocarcinoma mixed subtype	23993	-1	-1	594	dead	stage ib	male	white	not hispanic or latino	1941	yes	267	23993	not reported	not reported	not reported	m0	n0	t2	not reported	not reported	no	-1	65	not reported	not reported	not reported	not reported	not reported	-1	-1	-1	not reported	not reported	not reported	not reported	no	not reported	not reported	4	complete remission/response	-1	40	-1	no	no	2.19178	-1
TCGA-44-6776	lung adenocarcinoma- not otherwise specified (nos)	22150	2616	1938	-1	alive	stage ia	female	white	not reported	1945	not reported	-1	22150	not reported	not reported	not reported	mx	n0	t1	not reported	not reported	not reported	-1	60	not reported	not reported	not reported	not reported	not reported	-1	-1	-1	not reported	not reported	not reported	not reported	not reported	not reported	not reported	4	not reported	1960	45	2005	not reported	no	2.46575	45
TCGA-95-8494	lung adenocarcinoma- not otherwise specified (nos)	24773	84	71	-1	alive	stage iia	male	white	not hispanic or latino	1945	no	-1	24773	not reported	not reported	not reported	m0	n1	t2a	not reported	not reported	no	-1	67	not reported	not reported	not reported	not reported	not reported	-1	-1	-1	not reported	not reported	not reported	not reported	no	not reported	not reported	5	not reported	-1	-1	-1	no	no	-1	-1
TCGA-86-7711	lung adenocarcinoma- not otherwise specified (nos)	25719	630	27	1046	dead	stage iia	male	white	hispanic or latino	1941	not reported	-1	25719	not reported	not reported	not reported	m0	n1	t2a	not reported	not reported	not reported	31	70	not reported	not reported	not reported	not reported	complete response	37	181	-1	not reported	chemotherapy	not reported	not reported	not reported	not reported	not reported	2	not reported	1960	50	-1	not reported	no	2.73973	-1
TCGA-44-A47A	lung adenocarcinoma- not otherwise specified (nos)	28782	466	202	-1	alive	stage ib	female	white	not hispanic or latino	1934	no	-1	28782	not reported	not reported	not reported	mx	n0	t2a	not reported	not reported	no	-1	78	not reported	not reported	not reported	not reported	not reported	-1	-1	-1	not reported	not reported	not reported	not reported	no	not reported	not reported	4	complete remission/response	1970	80	2010	no	no	4.38356	40
TCGA-MP-A4T8	lung adenocarcinoma- not otherwise specified (nos)	25069	-1	-1	161	dead	stage iiia	male	not reported	not reported	1938	not reported	-1	25069	not reported	not reported	not reported	m0	n2	t2	not reported	not reported	no	15	68	not reported	not reported	not reported	not reported	not reported	42	72	-1	not reported	chemotherapy	not reported	not reported	no	not reported	not reported	3	not reported	1957	25	1972	no	no	1.36986	15
TCGA-86-8055	lung adenocarcinoma- not otherwise specified (nos)	29124	10	10	124	dead	stage iia	male	white	not hispanic or latino	1932	not reported	-1	29124	not reported	not reported	not reported	m0	n1	t2a	not reported	not reported	not reported	-1	79	not reported	not reported	not reported	not reported	not reported	-1	-1	-1	not reported	not reported	not reported	not reported	no	not reported	not reported	2	not reported	1955	60	-1	not reported	no	3.28767	-1
TCGA-75-6207	lung adenocarcinoma- not otherwise specified (nos)	-1	-1	-1	-1	dead	stage iiia	male	not reported	not reported	-1	not reported	-1	-1	not reported	not reported	not reported	m0	n2	t2	not reported	not reported	not reported	-1	-1	not reported	not reported	not reported	not reported	not reported	-1	-1	-1	not reported	not reported	not reported	not reported	not reported	not reported	not reported	3	not reported	-1	10	1972	not reported	no	0.547945	-1
TCGA-86-8668	lung bronchioloalveolar carcinoma mucinous	22383	423	45	-1	alive	stage ia	female	white	not hispanic or latino	1951	not reported	-1	22383	not reported	not reported	not reported	m0	n0	t1b	not reported	not reported	not reported	-1	61	not reported	not reported	not reported	not reported	not reported	-1	-1	-1	not reported	not reported	not reported	not reported	not reported	not reported	not reported	1	complete remission/response	-1	-1	-1	not reported	no	-1	-1
TCGA-L9-A743	lung adenocarcinoma- not otherwise specified (nos)	20780	664	312	-1	alive	stage iia	male	black or african american	not hispanic or latino	1957	no	-1	20780	not reported	not reported	not reported	m0	n1	t2a	not reported	not reported	no	14	56	not reported	not reported	not reported	not reported	complete response	120	193	-1	not reported	chemotherapy	not reported	not reported	no	not reported	not reported	2	complete remission/response	1986	40	-1	no	no	2.21918	-1
TCGA-44-A47G	lung adenocarcinoma- not otherwise specified (nos)	26800	351	135	-1	alive	stage ia	female	white	not hispanic or latino	1939	no	-1	26800	not reported	not reported	not reported	m0	n0	t1	not reported	not reported	no	-1	73	not reported	not reported	not reported	not reported	not reported	-1	-1	-1	not reported	not reported	not reported	not reported	no	not reported	not reported	4	complete remission/response	1956	28	2012	no	no	1.53425	56
TCGA-55-7227	lung adenocarcinoma- not otherwise specified (nos)	28458	53	53	952	dead	stage iiia	male	white	not hispanic or latino	1934	not reported	-1	28458	not reported	not reported	not reported	mx	n1	t3	not reported	not reported	not reported	26	77	not reported	not reported	not reported	not reported	clinical progressive disease	442	876	-1	not reported	chemotherapy	not reported	not reported	not reported	not reported	not reported	3	not reported	1953	-1	1993	not reported	no	-1	40
TCGA-53-7626	lung adenocarcinoma- not otherwise specified (nos)	28024	-1	-1	929	dead	stage iia	female	white	not hispanic or latino	1932	not reported	-1	28024	not reported	not reported	not reported	m0	n1	t1	not reported	not reported	no	15	76	not reported	not reported	not reported	not reported	clinical progressive disease	-1	-1	-1	not reported	chemotherapy	not reported	not reported	no	not reported	not reported	4	not reported	1971	35	2006	not reported	no	1.91781	35
TCGA-67-3774	lung adenocarcinoma- not otherwise specified (nos)	26704	385	385	-1	alive	stage ib	female	white	not hispanic or latino	1936	not reported	-1	26704	not reported	not reported	not reported	m0	n0	t2	not reported	not reported	no	-1	73	not reported	not reported	not reported	not reported	not reported	-1	-1	-1	not reported	not reported	not reported	not reported	no	not reported	not reported	3	not reported	-1	-1	-1	not reported	no	-1	-1
TCGA-J2-A4AD	lung adenocarcinoma- not otherwise specified (nos)	22414	287	287	550	dead	stage ia	female	white	not hispanic or latino	1951	no	-1	22414	not reported	not reported	not reported	mx	n0	t1a	not reported	not reported	no	-1	61	not reported	not reported	not reported	not reported	not reported	-1	-1	-1	not reported	not reported	not reported	not reported	no	not reported	not reported	2	not reported	1970	120	-1	no	no	6.57534	-1
TCGA-78-7167	lung papillary adenocarcinoma	28295	-1	-1	2681	dead	stage iv	male	white	not reported	1925	not reported	-1	28295	not reported	not reported	not reported	m1	n0	t2	not reported	not reported	no	-1	77	not reported	not reported	not reported	not reported	not reported	-1	-1	-1	not reported	not reported	not reported	not reported	no	not reported	not reported	2	not reported	1937	64	-1	not reported	no	3.50685	-1
TCGA-55-A491	lung adenocarcinoma- not otherwise specified (nos)	29593	626	0	-1	alive	stage ia	female	white	not hispanic or latino	1931	no	-1	29593	not reported	not reported	not reported	mx	n0	t1b	not reported	not reported	no	-1	81	not reported	not reported	not reported	not reported	not reported	-1	-1	-1	not reported	not reported	not reported	not reported	no	not reported	not reported	3	not reported	1952	45	1982	not reported	no	2.46575	30
TCGA-69-7765	lung adenocarcinoma mixed subtype	20625	165	129	-1	alive	not reported	male	black or african american	not hispanic or latino	1955	not reported	-1	20625	not reported	not reported	not reported	mx	n0	t4	not reported	not reported	no	20	56	not reported	not reported	not reported	not reported	not reported	93	-1	4	not reported	chemotherapy	not reported	not reported	no	not reported	other	4	not reported	1981	-1	2011	not reported	no	-1	30
TCGA-55-6972	lung papillary adenocarcinoma	26625	1475	1475	1632	dead	stage ib	male	white	not hispanic or latino	1933	not reported	-1	26625	not reported	not reported	not reported	m0	n0	t2	not reported	not reported	no	-1	72	not reported	not reported	not reported	not reported	not reported	-1	-1	-1	not reported	not reported	not reported	not reported	no	not reported	not reported	2	not reported	-1	-1	-1	not reported	no	-1	-1
TCGA-55-8096	lung adenocarcinoma- not otherwise specified (nos)	24684	47	47	719	dead	stage ib	female	white	not hispanic or latino	1944	no	-1	24684	not reported	not reported	not reported	mx	n0	t2a	not reported	not reported	no	-1	67	not reported	not reported	not reported	not reported	not reported	-1	-1	-1	not reported	not reported	not reported	not reported	no	not reported	not reported	2	not reported	1959	104	-1	not reported	no	5.69863	-1
TCGA-44-7660	lung adenocarcinoma- not otherwise specified (nos)	26594	592	162	-1	alive	stage ib	male	white	not hispanic or latino	1939	not reported	-1	26594	not reported	not reported	not reported	mx	n0	t2	not reported	not reported	not reported	-1	72	not reported	not reported	not reported	not reported	not reported	-1	-1	-1	not reported	not reported	not reported	not reported	not reported	not reported	not reported	2	not reported	1949	124	-1	not reported	no	6.79452	-1
TCGA-75-5122	lung adenocarcinoma- not otherwise specified (nos)	-1	-1	-1	-1	dead	stage ib	male	not reported	not reported	-1	not reported	-1	-1	not reported	not reported	not reported	m0	n0	t2	not reported	not reported	no	-1	-1	not reported	not reported	not reported	not reported	not reported	-1	-1	-1	not reported	not reported	not reported	not reported	no	not reported	not reported	3	not reported	-1	20	1985	not reported	no	1.09589	-1
TCGA-75-5125	lung adenocarcinoma- not otherwise specified (nos)	-1	-1	-1	2027	dead	stage iib	male	not reported	not reported	-1	not reported	-1	-1	not reported	not reported	not reported	m0	n1	t2	not reported	not reported	no	-1	-1	not reported	not reported	not reported	not reported	not reported	-1	-1	-1	not reported	not reported	not reported	not reported	no	not reported	not reported	3	not reported	-1	25	1987	not reported	no	1.36986	-1
TCGA-95-7948	lung adenocarcinoma mixed subtype	15363	476	133	-1	alive	stage ib	female	white	not hispanic or latino	1969	not reported	-1	15363	not reported	not reported	not reported	m0	n0	t2a	not reported	not reported	not reported	-1	42	not reported	not reported	not reported	not reported	not reported	-1	-1	-1	not reported	not reported	not reported	not reported	not reported	not reported	not reported	3	not reported	1993	0	1995	not reported	no	0.00821918	2
TCGA-62-8395	lung adenocarcinoma mixed subtype	29311	1216	705	-1	alive	stage iib	female	white	not hispanic or latino	1929	yes	500	29311	not reported	not reported	not reported	m0	n0	t3	not reported	not reported	no	-1	80	not reported	not reported	not reported	not reported	not reported	-1	-1	-1	not reported	not reported	not reported	not reported	yes	not reported	not reported	1	complete remission/response	-1	-1	-1	no	no	-1	-1
TCGA-97-7937	lung micropapillary adenocarcinoma	23919	564	181	-1	alive	stage ib	male	white	not hispanic or latino	1946	not reported	-1	23919	not reported	not reported	not reported	mx	n0	t2a	not reported	not reported	yes	-1	65	fish	not reported	not reported	not reported	not reported	-1	-1	-1	not reported	not reported	not reported	no	yes	not reported	not reported	3	not reported	-1	35	1994	not reported	no	1.91781	-1
TCGA-05-4402	lung adenocarcinoma mixed subtype	20819	-1	-1	244	dead	stage iv	female	not reported	not reported	1950	not reported	-1	20819	not reported	not reported	not reported	m1	nx	t2	not reported	not reported	not reported	5	57	not reported	not reported	not reported	not reported	complete response	122	122	-1	not reported	immunotherapy	not reported	not reported	not reported	not reported	not reported	1	not reported	-1	-1	-1	not reported	no	-1	-1
TCGA-55-8205	lung adenocarcinoma- not otherwise specified (nos)	28063	599	33	-1	alive	stage iia	female	white	not hispanic or latino	1936	no	-1	28063	not reported	not reported	not reported	m0	n0	t2b	not reported	not reported	no	30	76	not reported	not reported	not reported	not reported	not reported	488	-1	-1	not reported	targeted molecular therapy	not reported	no	yes	not reported	not reported	4	not reported	1951	30	2012	not reported	no	1.64384	61
TCGA-44-6146	lung mucinous adenocarcinoma	23378	728	302	-1	alive	stage iib	male	white	not hispanic or latino	1946	not reported	-1	23378	not reported	not reported	not reported	m0	n0	t3	not reported	not reported	not reported	7	64	not reported	not reported	not reported	not reported	not reported	44	44	1	not reported	chemotherapy	not reported	not reported	not reported	not reported	not reported	3	not reported	-1	15	1980	not reported	no	0.821918	-1
TCGA-MP-A4TF	lung adenocarcinoma- not otherwise specified (nos)	21387	-1	-1	336	dead	stage iia	female	white	not hispanic or latino	1952	yes	195	21387	not reported	not reported	not reported	m0	n0	t2b	not reported	not reported	no	18	58	not reported	not reported	not reported	not reported	partial response	48	133	-1	not reported	chemotherapy	not reported	not reported	no	not reported	not reported	4	partial remission/response	1970	40	2010	no	no	2.19178	40
TCGA-86-8279	lung adenocarcinoma- not otherwise specified (nos)	17032	949	21	-1	alive	stage iia	male	white	not hispanic or latino	1965	not reported	-1	17032	not reported	not reported	not reported	m0	n1	t2a	not reported	not reported	not reported	25	46	not reported	not reported	not reported	not reported	complete response	28	119	-1	not reported	chemotherapy	not reported	not reported	not reported	not reported	not reported	1	complete remission/response	-1	-1	-1	yes	no	-1	-1
TCGA-J2-A4AG	lung adenocarcinoma- not otherwise specified (nos)	24224	988	238	-1	alive	stage ia	female	white	not hispanic or latino	1946	no	-1	24224	not reported	not reported	not reported	mx	n0	t1b	not reported	not reported	no	-1	66	not reported	not reported	not reported	not reported	not reported	-1	-1	-1	not reported	not reported	not reported	not reported	no	not reported	not reported	3	complete remission/response	1956	25	1981	no	no	1.36986	25
TCGA-35-4123	lung adenocarcinoma- not otherwise specified (nos)	14064	182	182	-1	alive	stage ia	male	white	not hispanic or latino	1972	not reported	-1	14064	not reported	not reported	not reported	m0	n0	t1	not reported	not reported	no	-1	38	not reported	not reported	not reported	not reported	not reported	-1	-1	-1	not reported	not reported	not reported	not reported	no	not reported	not reported	4	not reported	1990	20	2010	not reported	no	1.09589	20
TCGA-75-5126	lung papillary adenocarcinoma	-1	-1	-1	-1	alive	stage iiia	female	not reported	not reported	-1	not reported	-1	-1	not reported	not reported	not reported	m0	n2	t3	not reported	not reported	no	-1	-1	not reported	not reported	not reported	not reported	not reported	-1	-1	-1	not reported	not reported	not reported	not reported	no	not reported	not reported	4	not reported	-1	40	2007	not reported	no	2.19178	-1
TCGA-86-8075	lung adenocarcinoma- not otherwise specified (nos)	24402	479	43	694	dead	stage ib	female	white	not hispanic or latino	1945	not reported	-1	24402	not reported	not reported	not reported	m0	n0	t2	not reported	not reported	no	25	66	not reported	not reported	not reported	not reported	not reported	388	-1	-1	not reported	targeted molecular therapy	not reported	not reported	no	not reported	not reported	1	not reported	-1	-1	-1	not reported	no	-1	-1
TCGA-44-7672	lung adenocarcinoma- not otherwise specified (nos)	19200	719	418	-1	alive	stage ia	female	white	not hispanic or latino	1958	not reported	-1	19200	not reported	not reported	not reported	m0	n0	t1b	not reported	not reported	not reported	-1	52	not reported	not reported	not reported	not reported	not reported	-1	-1	-1	not reported	not reported	not reported	not reported	not reported	not reported	not reported	2	not reported	1980	20	-1	not reported	no	1.09589	-1
TCGA-44-2665	lung adenocarcinoma- not otherwise specified (nos)	20349	1301	400	-1	alive	stage iib	female	white	not hispanic or latino	1954	not reported	-1	20349	not reported	not reported	not reported	m0	n1	t2	not reported	not reported	not reported	13	55	not reported	not reported	not reported	not reported	not reported	77	140	4	not reported	chemotherapy	not reported	not reported	not reported	not reported	not reported	1	not reported	-1	-1	-1	not reported	no	-1	-1
TCGA-50-5931	lung adenocarcinoma- not otherwise specified (nos)	27733	-1	-1	434	dead	stage ib	female	white	not hispanic or latino	1926	not reported	-1	27733	not reported	not reported	not reported	m0	n0	t2	not reported	not reported	not reported	-1	75	not reported	not reported	not reported	not reported	not reported	-1	-1	-1	not reported	not reported	not reported	not reported	not reported	not reported	not reported	4	not reported	-1	40	-1	not reported	no	2.19178	-1
TCGA-50-5944	lung acinar adenocarcinoma	25440	1750	373	-1	alive	stage ia	female	white	not reported	1941	not reported	-1	25440	not reported	not reported	not reported	m0	n0	t1	not reported	not reported	not reported	-1	69	not reported	not reported	not reported	not reported	not reported	-1	-1	-1	not reported	not reported	not reported	not reported	not reported	not reported	not reported	-1	not reported	-1	-1	-1	not reported	no	-1	-1
TCGA-38-7271	lung adenocarcinoma- not otherwise specified (nos)	26440	-1	-1	800	dead	stage ia	female	white	not hispanic or latino	1934	not reported	-1	26440	not reported	not reported	not reported	m0	n0	t1	not reported	not reported	no	10	72	not reported	not reported	not reported	not reported	not reported	574	574	1	not reported	chemotherapy	not reported	not reported	no	not reported	not reported	4	not reported	1971	25	1999	not reported	no	1.36986	28
TCGA-64-1677	lung adenocarcinoma- not otherwise specified (nos)	28482	-1	-1	628	dead	stage iiia	female	white	not hispanic or latino	1928	not reported	-1	28482	not reported	not reported	not reported	m0	n2	t2	not reported	not reported	not reported	18	77	not reported	not reported	not reported	not reported	not reported	51	121	4	not reported	chemotherapy	not reported	not reported	not reported	not reported	not reported	2	not reported	1955	50	-1	not reported	no	2.73973	-1
TCGA-49-AARN	lung adenocarcinoma- not otherwise specified (nos)	20605	-1	-1	1135	dead	stage ia	female	black or african american	not hispanic or latino	1944	not reported	-1	20605	not reported	not reported	not reported	mx	n0	t1	not reported	not reported	not reported	-1	56	not reported	not reported	not reported	not reported	not reported	-1	-1	-1	not reported	not reported	not reported	not reported	not reported	not reported	not reported	5	complete remission/response	-1	-1	-1	no	no	-1	-1
TCGA-67-3772	lung adenocarcinoma- not otherwise specified (nos)	29989	573	573	-1	alive	stage ib	female	white	not hispanic or latino	1927	not reported	-1	29989	not reported	not reported	not reported	m0	n0	t2	not reported	not reported	no	-1	82	not reported	not reported	not reported	not reported	not reported	-1	-1	-1	not reported	not reported	not reported	not reported	no	not reported	not reported	1	not reported	-1	-1	-1	not reported	no	-1	-1
TCGA-50-6592	lung adenocarcinoma- not otherwise specified (nos)	26191	-1	-1	777	dead	stage ib	female	white	not hispanic or latino	1936	not reported	-1	26191	not reported	not reported	not reported	m0	n0	t2	not reported	not reported	not reported	-1	71	not reported	not reported	not reported	not reported	not reported	-1	-1	-1	not reported	not reported	not reported	not reported	not reported	not reported	not reported	4	not reported	-1	-1	-1	not reported	no	-1	-1
TCGA-69-8453	mucinous (colloid) carcinoma	28413	788	171	-1	alive	stage iib	male	white	not hispanic or latino	1935	no	-1	28413	not reported	not reported	not reported	mx	n0	t3	not reported	not reported	not reported	19	77	not reported	not reported	not reported	not reported	not reported	45	157	-1	not reported	chemotherapy	not reported	not reported	not reported	not reported	not reported	3	not reported	-1	12	1974	no	no	0.657534	-1
TCGA-MP-A4TI	lung adenocarcinoma- not otherwise specified (nos)	26565	-1	-1	429	dead	stage iia	male	white	not hispanic or latino	1938	yes	84	26565	not reported	not reported	not reported	m0	n1	t2a	not reported	not reported	no	-1	72	not reported	not reported	not reported	not reported	not reported	-1	-1	-1	not reported	not reported	g12c	yes	yes	not reported	not reported	3	not reported	1955	35	1990	not reported	no	1.91781	35
TCGA-38-6178	lung adenocarcinoma- not otherwise specified (nos)	25593	448	158	-1	alive	stage iiia	female	white	not hispanic or latino	1940	not reported	-1	25593	not reported	not reported	not reported	not reported	n2	t2b	not reported	not reported	no	23	70	not reported	not reported	not reported	not reported	not reported	57	98	3	not reported	chemotherapy	not reported	no	yes	not reported	exon 19 deletion	1	not reported	-1	-1	-1	not reported	no	-1	-1
TCGA-75-6214	lung adenocarcinoma- not otherwise specified (nos)	-1	-1	-1	1115	dead	stage iiia	female	not reported	not reported	-1	not reported	-1	-1	not reported	not reported	not reported	m0	n2	t2	not reported	not reported	not reported	-1	-1	not reported	not reported	not reported	not reported	not reported	-1	-1	-1	not reported	not reported	not reported	not reported	not reported	not reported	not reported	2	not reported	1970	40	-1	not reported	no	2.19178	-1
TCGA-49-AAQV	lung adenocarcinoma mixed subtype	23370	-1	-1	677	dead	stage ii	female	black or african american	not hispanic or latino	1949	yes	509	23370	not reported	not reported	not reported	mx	n1	t1	not reported	not reported	yes	-1	63	fish	not reported	not reported	not reported	not reported	-1	-1	-1	not reported	not reported	not reported	not reported	yes	not reported	exon 19 deletion	1	complete remission/response	-1	-1	-1	no	no	-1	-1
TCGA-97-8177	lung adenocarcinoma mixed subtype	21648	499	147	-1	alive	stage ib	female	white	not hispanic or latino	1953	no	-1	21648	not reported	not reported	not reported	m0	n0	t2a	not reported	not reported	no	19	59	not reported	not reported	not reported	not reported	not reported	205	-1	-1	not reported	targeted molecular therapy	not reported	no	yes	not reported	l858r	1	not reported	-1	-1	-1	no	no	-1	-1
TCGA-35-3615	lung adenocarcinoma- not otherwise specified (nos)	21076	14	14	-1	alive	stage ib	male	white	not hispanic or latino	1950	not reported	-1	21076	not reported	not reported	not reported	m0	n0	t2	not reported	not reported	no	-1	57	not reported	not reported	not reported	not reported	not reported	-1	-1	-1	not reported	not reported	not reported	not reported	no	not reported	not reported	1	not reported	-1	-1	-1	not reported	no	-1	-1
TCGA-55-6985	lung adenocarcinoma- not otherwise specified (nos)	21381	1233	1233	-1	alive	stage ib	female	white	not reported	1946	not reported	-1	21381	not reported	not reported	not reported	mx	n0	t2	not reported	not reported	no	-1	58	not reported	not reported	not reported	not reported	not reported	-1	-1	-1	not reported	not reported	not reported	not reported	no	not reported	not reported	4	not reported	-1	50	2004	not reported	no	2.73973	-1
TCGA-64-5774	lung adenocarcinoma- not otherwise specified (nos)	22059	2676	2550	-1	alive	stage ib	male	white	not hispanic or latino	1944	not reported	-1	22059	not reported	not reported	not reported	m0	n0	t2	not reported	not reported	not reported	-1	60	not reported	not reported	not reported	not reported	not reported	-1	-1	-1	not reported	not reported	not reported	not reported	not reported	not reported	not reported	4	not reported	1959	45	2004	not reported	no	2.46575	45
TCGA-69-8255	lung solid pattern predominant adenocarcinoma	26289	129	129	-1	alive	stage ia	male	white	hispanic or latino	1940	no	-1	26289	not reported	not reported	not reported	m0	n0	t1a	not reported	not reported	no	-1	71	not reported	not reported	not reported	not reported	not reported	-1	-1	-1	not reported	not reported	not reported	not reported	yes	not reported	other	2	not reported	1971	40	-1	no	no	2.19178	-1
TCGA-38-4632	lung adenocarcinoma- not otherwise specified (nos)	15418	-1	-1	1357	dead	stage iv	male	black or african american	not hispanic or latino	1956	not reported	-1	15418	not reported	not reported	not reported	m1	n1	t2	not reported	not reported	no	14	42	not reported	not reported	not reported	not reported	not reported	1127	1169	2	not reported	chemotherapy	not reported	not reported	no	not reported	not reported	4	not reported	-1	10	1991	not reported	no	0.547945	-1
TCGA-50-5049	lung adenocarcinoma- not otherwise specified (nos)	25577	3094	1485	-1	alive	stage ia	male	white	not hispanic or latino	1936	not reported	-1	25577	not reported	not reported	not reported	m0	n0	t2	not reported	not reported	not reported	-1	70	not reported	not reported	not reported	not reported	not reported	-1	-1	-1	not reported	not reported	not reported	no	yes	not reported	not reported	-1	not reported	-1	-1	-1	not reported	no	-1	-1
TCGA-38-4630	lung papillary adenocarcinoma	27667	-1	-1	1073	dead	stage ib	female	white	not hispanic or latino	1925	not reported	-1	27667	not reported	not reported	not reported	m0	n0	t2	not reported	not reported	no	-1	75	not reported	not reported	not reported	not reported	not reported	-1	-1	-1	not reported	not reported	not reported	not reported	no	not reported	not reported	1	not reported	-1	-1	-1	not reported	no	-1	-1
TCGA-55-8208	lung adenocarcinoma- not otherwise specified (nos)	26716	674	0	-1	alive	stage ia	female	white	not hispanic or latino	1939	no	-1	26716	not reported	not reported	not reported	m0	n0	t1b	not reported	not reported	not reported	-1	73	not reported	not reported	not reported	not reported	not reported	-1	-1	-1	not reported	not reported	not reported	not reported	not reported	not reported	not reported	2	complete remission/response	-1	50	-1	not reported	no	2.73973	-1
TCGA-44-6145	lung adenocarcinoma- not otherwise specified (nos)	22745	595	103	-1	alive	stage ia	female	white	not hispanic or latino	1949	not reported	-1	22745	not reported	not reported	not reported	m0	n0	t1	not reported	not reported	not reported	-1	62	not reported	not reported	not reported	not reported	not reported	-1	-1	-1	not reported	not reported	not reported	no	not reported	not reported	not reported	4	not reported	1963	75	1999	not reported	no	4.10959	36
TCGA-62-A46S	lung papillary adenocarcinoma	26825	-1	-1	1653	dead	stage ib	male	white	not hispanic or latino	1934	yes	527	26825	not reported	not reported	not reported	m0	n0	t2	not reported	not reported	no	25	73	not reported	not reported	not reported	not reported	not reported	78	198	-1	not reported	targeted molecular therapy	not reported	not reported	no	not reported	not reported	4	complete remission/response	-1	40	-1	no	no	2.19178	-1
TCGA-55-6543	lung bronchioloalveolar carcinoma mucinous	-1	435	2	-1	alive	stage ia	female	white	not reported	1950	not reported	-1	-1	not reported	not reported	not reported	mx	n0	t1b	not reported	not reported	not reported	-1	60	not reported	not reported	not reported	not reported	not reported	-1	-1	-1	not reported	not reported	not reported	not reported	not reported	not reported	not reported	4	not reported	-1	60	2004	not reported	no	3.28767	-1
TCGA-49-4486	lung adenocarcinoma- not otherwise specified (nos)	26415	-1	-1	2318	dead	stage ia	male	white	not hispanic or latino	1920	not reported	-1	26415	not reported	not reported	not reported	m0	n0	t1	not reported	not reported	not reported	-1	72	not reported	not reported	not reported	not reported	not reported	-1	-1	-1	not reported	not reported	not reported	not reported	not reported	not reported	not reported	3	not reported	1932	17	1967	not reported	no	0.958904	35
TCGA-55-8511	lung adenocarcinoma- not otherwise specified (nos)	26986	552	9	-1	alive	stage ib	female	white	not hispanic or latino	1939	no	-1	26986	not reported	not reported	not reported	mx	n0	t2a	not reported	not reported	not reported	-1	73	not reported	not reported	not reported	not reported	not reported	-1	-1	-1	not reported	not reported	not reported	not reported	not reported	not reported	not reported	2	complete remission/response	1953	58	-1	no	no	3.17808	-1
TCGA-O1-A52J	lung adenocarcinoma- not otherwise specified (nos)	27223	-1	-1	1798	dead	stage ia	female	white	not hispanic or latino	1933	yes	898	27223	not reported	not reported	not reported	mx	n0	t1	not reported	not reported	no	-1	74	not reported	not reported	not reported	not reported	not reported	-1	-1	-1	not reported	not reported	not reported	not reported	no	not reported	not reported	3	not reported	1950	45	1980	no	no	2.46575	30
TCGA-86-7954	lung bronchioloalveolar carcinoma nonmucinous	25062	605	0	-1	alive	stage ib	female	white	not hispanic or latino	1943	not reported	-1	25062	not reported	not reported	not reported	m0	n0	t2	not reported	not reported	not reported	28	68	not reported	not reported	not reported	not reported	complete response	55	81	-1	not reported	chemotherapy	not reported	not reported	no	not reported	not reported	3	not reported	1963	8	1971	not reported	no	0.438356	8
TCGA-73-4676	lung adenocarcinoma- not otherwise specified (nos)	16746	164	122	281	dead	stage iia	male	white	not hispanic or latino	1965	not reported	-1	16746	not reported	not reported	not reported	m0	n1	t2a	not reported	not reported	no	2	45	not reported	not reported	not reported	not reported	not reported	-74	-40	3	not reported	chemotherapy	not reported	not reported	no	not reported	not reported	4	not reported	1977	48	2009	not reported	yes	2.63014	32
TCGA-95-A4VK	lung adenocarcinoma mixed subtype	27040	651	121	-1	alive	stage iiia	female	white	not hispanic or latino	1938	no	-1	27040	not reported	not reported	not reported	m0	n2	t2b	not reported	not reported	no	21	74	not reported	not reported	not reported	not reported	stable disease	76	121	-1	not reported	chemotherapy	not reported	not reported	yes	not reported	not reported	3	stable disease	1956	45	1986	yes	no	2.46575	30
TCGA-95-A4VP	lung acinar adenocarcinoma	24130	605	168	-1	alive	stage iiia	female	white	not reported	1946	no	-1	24130	not reported	not reported	not reported	m0	n2	t2b	not reported	not reported	no	22	66	not reported	not reported	not reported	not reported	stable disease	63	126	-1	not reported	chemotherapy	not reported	not reported	no	not reported	not reported	4	stable disease	1972	20	2012	no	no	1.09589	40
TCGA-95-A4VN	lung solid pattern predominant adenocarcinoma	22927	553	142	-1	alive	stage iia	female	white	not hispanic or latino	1950	no	-1	22927	not reported	not reported	not reported	m0	n1	t2a	not reported	not reported	no	-1	62	not reported	not reported	not reported	not reported	not reported	-1	-1	-1	not reported	not reported	not reported	not reported	yes	not reported	not reported	4	stable disease	1965	42	2007	no	no	2.30137	42
TCGA-55-6971	lung adenocarcinoma- not otherwise specified (nos)	21734	1400	25	-1	alive	stage ib	female	white	not reported	1951	not reported	-1	21734	not reported	not reported	not reported	mx	n0	t2	not reported	not reported	no	-1	59	not reported	not reported	not reported	not reported	not reported	-1	-1	-1	not reported	not reported	not reported	not reported	no	not reported	not reported	4	not reported	1970	60	2010	not reported	no	3.28767	40
TCGA-73-4662	lung adenocarcinoma- not otherwise specified (nos)	23762	2515	912	-1	alive	stage ia	female	white	not hispanic or latino	1942	not reported	-1	23762	not reported	not reported	not reported	m0	n0	t1	not reported	not reported	no	-1	65	not reported	not reported	not reported	not reported	not reported	-1	-1	-1	not reported	not reported	not reported	not reported	no	not reported	not reported	3	not reported	1955	10	1972	not reported	no	0.547945	17
TCGA-86-8585	lung solid pattern predominant adenocarcinoma	20918	353	35	-1	alive	stage ib	male	white	not hispanic or latino	1955	not reported	-1	20918	not reported	not reported	not reported	m0	n0	t2a	not reported	not reported	not reported	-1	57	not reported	not reported	not reported	not reported	not reported	-1	-1	-1	not reported	not reported	not reported	not reported	no	not reported	not reported	1	complete remission/response	-1	-1	-1	not reported	no	-1	-1
TCGA-55-7995	lung adenocarcinoma- not otherwise specified (nos)	26837	889	5	-1	alive	stage ia	female	white	not hispanic or latino	1939	no	-1	26837	not reported	not reported	not reported	m0	n0	t1b	not reported	not reported	no	26	73	not reported	not reported	not reported	not reported	complete response	483	525	-1	not reported	chemotherapy	not reported	not reported	no	not reported	not reported	4	not reported	-1	60	2002	not reported	no	3.28767	-1
TCGA-91-6830	lung adenocarcinoma- not otherwise specified (nos)	23922	60	1	-1	alive	stage iia	female	white	not hispanic or latino	1937	not reported	-1	23922	not reported	not reported	not reported	mx	n1	t1	not reported	not reported	not reported	-1	65	not reported	not reported	not reported	not reported	not reported	-1	-1	-1	not reported	not reported	not reported	not reported	not reported	not reported	not reported	4	not reported	1990	12	2002	not reported	no	0.657534	12
TCGA-64-1681	lung adenocarcinoma- not otherwise specified (nos)	22525	-1	-1	1167	dead	stage ia	female	white	not hispanic or latino	1947	not reported	-1	22525	not reported	not reported	not reported	m0	n0	t1	not reported	not reported	not reported	-1	61	not reported	not reported	not reported	not reported	not reported	-1	-1	-1	not reported	not reported	not reported	no	yes	not reported	exon 19 deletion	3	not reported	1968	-1	1988	not reported	no	-1	20
TCGA-38-4625	lung adenocarcinoma- not otherwise specified (nos)	24241	2973	2973	-1	alive	stage ib	female	white	not hispanic or latino	1936	not reported	-1	24241	not reported	not reported	not reported	m0	n0	t2a	not reported	not reported	no	-1	66	not reported	not reported	not reported	not reported	not reported	-1	-1	-1	not reported	not reported	not reported	not reported	no	not reported	not reported	2	not reported	1952	50	-1	not reported	no	2.73973	-1
TCGA-05-4422	lung adenocarcinoma mixed subtype	24837	365	365	-1	alive	stage ib	male	not reported	not reported	1940	not reported	-1	24837	not reported	not reported	not reported	m0	n0	t2	not reported	not reported	not reported	-1	68	not reported	not reported	not reported	not reported	not reported	-1	-1	-1	not reported	not reported	not reported	not reported	not reported	not reported	not reported	4	not reported	-1	147	-1	not reported	no	8.05479	-1
TCGA-86-8673	lung bronchioloalveolar carcinoma nonmucinous	22571	862	0	-1	alive	stage ib	male	white	not hispanic or latino	1950	not reported	-1	22571	not reported	not reported	not reported	m0	n0	t2	not reported	not reported	not reported	-1	61	not reported	not reported	not reported	not reported	not reported	-1	-1	-1	not reported	not reported	not reported	not reported	not reported	not reported	not reported	2	not reported	1968	54	-1	not reported	no	2.9589	-1
TCGA-05-4434	lung adenocarcinoma mixed subtype	24472	-1	-1	457	dead	stage iv	female	not reported	not reported	1941	not reported	-1	24472	not reported	not reported	not reported	m1	n1	t4	not reported	not reported	not reported	-1	67	not reported	not reported	not reported	not reported	not reported	-1	-1	-1	not reported	not reported	not reported	not reported	not reported	not reported	not reported	2	not reported	-1	15	-1	not reported	no	0.821918	-1
TCGA-55-A48X	lung adenocarcinoma- not otherwise specified (nos)	23341	689	33	-1	alive	stage iia	female	white	not hispanic or latino	1949	no	-1	23341	not reported	not reported	not reported	m0	n1	t1b	not reported	not reported	not reported	30	63	not reported	not reported	not reported	not reported	complete response	66	150	-1	not reported	chemotherapy	not reported	not reported	not reported	not reported	not reported	4	not reported	1963	36	1999	not reported	no	1.9726	36
TCGA-62-8394	lung adenocarcinoma mixed subtype	23758	-1	-1	139	dead	stage iiib	female	white	not hispanic or latino	1943	no	-1	23758	not reported	not reported	not reported	m0	n2	t4	not reported	not reported	no	21	65	not reported	not reported	not reported	not reported	not reported	54	124	-1	not reported	chemotherapy	not reported	not reported	no	not reported	not reported	1	complete remission/response	-1	-1	-1	no	no	-1	-1
TCGA-55-7903	lung adenocarcinoma- not otherwise specified (nos)	23509	567	19	-1	alive	stage ia	male	white	not hispanic or latino	1947	not reported	-1	23509	not reported	not reported	not reported	mx	n0	t1b	not reported	not reported	no	-1	64	not reported	not reported	not reported	not reported	not reported	-1	-1	-1	not reported	not reported	not reported	not reported	no	not reported	not reported	2	not reported	-1	40	-1	not reported	no	2.19178	-1
TCGA-44-2657	lung adenocarcinoma- not otherwise specified (nos)	27298	1351	400	-1	alive	stage ib	female	white	not hispanic or latino	1935	not reported	-1	27298	not reported	not reported	not reported	m0	nx	t2	not reported	not reported	not reported	-1	74	not reported	not reported	not reported	not reported	not reported	-1	-1	-1	not reported	not reported	not reported	not reported	not reported	not reported	not reported	4	not reported	1959	25	2006	not reported	no	1.36986	47
TCGA-55-7727	lung adenocarcinoma- not otherwise specified (nos)	25929	119	34	-1	alive	stage iiia	male	white	not hispanic or latino	1941	not reported	-1	25929	not reported	not reported	not reported	mx	n2	t1a	not reported	not reported	not reported	-1	70	not reported	not reported	not reported	not reported	not reported	-1	-1	-1	not reported	not reported	not reported	not reported	not reported	not reported	not reported	2	not reported	-1	-1	-1	not reported	no	-1	-1
TCGA-53-A4EZ	lung acinar adenocarcinoma	23201	1071	280	-1	alive	stage iia	male	white	hispanic or latino	1949	no	-1	23201	not reported	not reported	not reported	mx	n1	t2a	not reported	not reported	yes	7	63	fish	not reported	not reported	not reported	complete response	132	226	-1	not reported	chemotherapy	not reported	no	yes	not reported	not reported	3	not reported	1956	40	1996	no	no	2.19178	40
TCGA-78-7145	lung adenocarcinoma- not otherwise specified (nos)	19080	-1	-1	826	dead	stage iv	female	white	not reported	1948	not reported	-1	19080	not reported	not reported	not reported	m1	n1	t4	not reported	not reported	no	5	52	not reported	not reported	not reported	not reported	not reported	28	161	6	not reported	chemotherapy	not reported	not reported	no	not reported	not reported	4	not reported	1973	25	1998	not reported	no	1.36986	25
TCGA-50-6594	lung adenocarcinoma- not otherwise specified (nos)	28924	-1	-1	370	dead	stage iiia	female	black or african american	not hispanic or latino	1930	not reported	-1	28924	not reported	not reported	not reported	m0	n2	t3	not reported	not reported	yes	-1	79	not reported	not reported	not reported	not reported	not reported	-1	-1	-1	not reported	not reported	not reported	no	not reported	not reported	not reported	4	not reported	-1	-1	1998	not reported	no	-1	-1
TCGA-L9-A443	lung adenocarcinoma- not otherwise specified (nos)	23062	116	116	193	dead	stage ia	female	white	not hispanic or latino	1949	no	-1	23062	not reported	not reported	not reported	mx	n0	t1a	not reported	not reported	no	-1	63	not reported	not reported	not reported	not reported	not reported	-1	-1	-1	not reported	not reported	not reported	not reported	no	not reported	not reported	4	complete remission/response	1960	90	2005	no	no	4.93151	45
TCGA-86-7714	lung adenocarcinoma mixed subtype	22619	0	0	625	dead	stage iiia	female	black or african american	not hispanic or latino	1950	not reported	-1	22619	not reported	not reported	not reported	m0	n2	t1b	not reported	not reported	not reported	-1	61	not reported	not reported	not reported	not reported	not reported	-1	-1	-1	not reported	not reported	not reported	not reported	no	not reported	not reported	2	not reported	1968	43	-1	not reported	no	2.35616	-1
TCGA-55-7816	lung adenocarcinoma- not otherwise specified (nos)	18170	44	44	468	dead	stage iv	female	white	not hispanic or latino	1962	not reported	-1	18170	not reported	not reported	not reported	mx	nx	tx	not reported	not reported	not reported	-1	49	not reported	not reported	not reported	not reported	not reported	-1	-1	-1	not reported	not reported	not reported	not reported	not reported	not reported	not reported	1	not reported	-1	-1	-1	not reported	no	-1	-1
TCGA-67-4679	lung adenocarcinoma- not otherwise specified (nos)	25202	448	448	-1	alive	not reported	male	white	not hispanic or latino	1940	not reported	-1	25202	not reported	not reported	not reported	m0	n0	t3	not reported	not reported	no	-1	69	not reported	not reported	not reported	not reported	not reported	-1	-1	-1	not reported	not reported	not reported	not reported	no	not reported	not reported	4	not reported	-1	-1	-1	not reported	no	-1	-1
TCGA-93-A4JO	lung adenocarcinoma mixed subtype	25898	-1	-1	33	dead	stage ia	male	white	not hispanic or latino	1942	no	-1	25898	not reported	not reported	not reported	mx	n0	t1a	not reported	not reported	no	-1	70	not reported	not reported	not reported	not reported	not reported	-1	-1	-1	not reported	not reported	not reported	not reported	no	not reported	not reported	4	not reported	1956	50	2006	no	no	2.73973	50
TCGA-71-8520	lung adenocarcinoma- not otherwise specified (nos)	21921	3	3	210	dead	stage ib	female	asian	not hispanic or latino	1951	no	-1	21921	not reported	not reported	not reported	m0	n0	t2	not reported	not reported	not reported	-1	60	not reported	not reported	not reported	not reported	not reported	-1	-1	-1	not reported	not reported	not reported	no	not reported	not reported	not reported	1	complete remission/response	-1	-1	-1	no	no	-1	-1
TCGA-55-7994	lung adenocarcinoma- not otherwise specified (nos)	29858	603	31	-1	alive	stage iib	male	white	not hispanic or latino	1930	no	-1	29858	not reported	not reported	not reported	mx	n0	t3	not reported	not reported	no	28	81	not reported	not reported	not reported	not reported	complete response	56	121	-1	not reported	chemotherapy	not reported	not reported	no	not reported	not reported	2	complete remission/response	-1	28	-1	not reported	no	1.53425	-1
TCGA-55-7281	lung adenocarcinoma- not otherwise specified (nos)	25870	872	18	-1	alive	stage ia	female	white	not reported	1941	not reported	-1	25870	not reported	not reported	not reported	m0	n0	t1b	not reported	not reported	not reported	28	70	not reported	not reported	not reported	not reported	partial response	712	-1	-1	not reported	chemotherapy	not reported	not reported	not reported	not reported	not reported	4	not reported	-1	20	-1	not reported	no	1.09589	-1
TCGA-50-8460	lung papillary adenocarcinoma	27270	829	105	-1	alive	stage ia	male	white	not hispanic or latino	1938	no	-1	27270	not reported	not reported	not reported	m0	n0	t1a	not reported	not reported	not reported	-1	74	not reported	not reported	not reported	not reported	not reported	-1	-1	-1	not reported	not reported	not reported	no	yes	not reported	not reported	-1	not reported	-1	-1	-1	yes	no	-1	-1
TCGA-50-6593	lung adenocarcinoma mixed subtype	18152	-1	-1	336	dead	stage iiia	female	white	not hispanic or latino	1959	not reported	-1	18152	not reported	not reported	not reported	m0	n2	t1	not reported	not reported	yes	-1	49	not reported	not reported	not reported	not reported	not reported	-1	-1	-1	not reported	not reported	not reported	no	yes	not reported	not reported	4	not reported	-1	-1	-1	not reported	no	-1	-1
TCGA-86-7953	lung adenocarcinoma- not otherwise specified (nos)	25315	997	34	-1	alive	stage ia	female	white	not hispanic or latino	1942	not reported	-1	25315	not reported	not reported	not reported	m0	n0	t1b	not reported	not reported	not reported	-1	69	not reported	not reported	not reported	not reported	not reported	-1	-1	-1	not reported	not reported	not reported	not reported	no	not reported	not reported	1	not reported	-1	-1	-1	not reported	no	-1	-1
TCGA-05-5420	lung adenocarcinoma- not otherwise specified (nos)	24472	457	31	-1	alive	stage iiia	male	not reported	not reported	1941	not reported	-1	24472	not reported	not reported	not reported	m0	n2	t2	not reported	not reported	not reported	-1	67	not reported	not reported	not reported	not reported	not reported	-1	-1	-1	not reported	not reported	not reported	not reported	not reported	not reported	not reported	4	not reported	1961	40	2001	not reported	no	2.19178	40
TCGA-78-7539	lung adenocarcinoma mixed subtype	27445	791	327	-1	alive	stage iia	female	white	not reported	1936	not reported	-1	27445	not reported	not reported	not reported	m0	n0	t2b	not reported	not reported	no	19	75	not reported	not reported	not reported	not reported	not reported	70	133	4	not reported	chemotherapy	not reported	not reported	no	not reported	not reported	3	not reported	1953	2	1981	not reported	no	0.120548	28
TCGA-05-4390	lung adenocarcinoma mixed subtype	21430	1126	1126	-1	alive	stage ib	female	not reported	not reported	1947	not reported	-1	21430	not reported	not reported	not reported	m0	n0	t2	not reported	not reported	not reported	5	58	not reported	not reported	not reported	not reported	complete response	61	92	-1	not reported	chemotherapy	not reported	not reported	not reported	not reported	not reported	4	not reported	1966	15	1996	not reported	no	0.821918	30
TCGA-69-7760	lung adenocarcinoma mixed subtype	26777	202	154	-1	alive	stage iib	male	white	not hispanic or latino	1938	not reported	-1	26777	not reported	not reported	not reported	m0	n0	t3	not reported	not reported	no	2	73	not reported	not reported	not reported	not reported	not reported	47	110	4	not reported	chemotherapy	not reported	not reported	yes	not reported	not reported	1	not reported	-1	-1	-1	not reported	no	-1	-1
TCGA-38-4627	lung adenocarcinoma- not otherwise specified (nos)	23510	-1	-1	1147	dead	stage iia	female	white	not hispanic or latino	1939	not reported	-1	23510	not reported	not reported	not reported	m0	n1	t1b	not reported	not reported	not reported	-1	64	not reported	not reported	not reported	not reported	not reported	-1	-1	-1	not reported	not reported	not reported	not reported	not reported	not reported	not reported	4	not reported	-1	-1	-1	not reported	no	-1	-1
TCGA-49-4501	lung adenocarcinoma- not otherwise specified (nos)	24817	-1	-1	1421	dead	stage ib	female	white	not hispanic or latino	1929	not reported	-1	24817	not reported	not reported	not reported	m0	n0	t2	not reported	not reported	not reported	-1	67	not reported	not reported	not reported	not reported	not reported	-1	-1	-1	not reported	not reported	not reported	not reported	not reported	not reported	not reported	1	not reported	-1	-1	-1	not reported	no	-1	-1
TCGA-73-A9RS	lung adenocarcinoma- not otherwise specified (nos)	15162	305	305	340	dead	stage iib	male	black or african american	not hispanic or latino	1972	yes	107	15162	not reported	not reported	not reported	m0	n0	t3	not reported	not reported	yes	17	41	fish	not reported	not reported	not reported	not reported	284	-1	-1	not reported	chemotherapy	not reported	no	yes	not reported	not reported	2	progressive disease	1990	11	-1	yes	no	0.60274	-1
TCGA-44-2659	lung adenocarcinoma- not otherwise specified (nos)	23808	1367	529	-1	alive	stage iib	female	white	not hispanic or latino	1944	not reported	-1	23808	not reported	not reported	not reported	m0	n1	t1	not reported	not reported	not reported	20	65	not reported	not reported	not reported	not reported	not reported	39	101	4	not reported	chemotherapy	not reported	not reported	not reported	not reported	not reported	4	not reported	1965	57	2003	not reported	no	3.12329	38
TCGA-49-4488	lung adenocarcinoma- not otherwise specified (nos)	27332	-1	-1	869	dead	stage ia	female	white	not hispanic or latino	1918	not reported	-1	27332	not reported	not reported	not reported	mx	n0	t1	not reported	not reported	not reported	-1	74	not reported	not reported	not reported	not reported	not reported	-1	-1	-1	not reported	not reported	not reported	not reported	not reported	not reported	not reported	3	not reported	-1	-1	1964	not reported	no	-1	-1
TCGA-05-4395	lung adenocarcinoma mixed subtype	27971	-1	-1	0	dead	stage iiib	male	not reported	not reported	1930	not reported	-1	27971	not reported	not reported	not reported	m0	n2	t4	not reported	not reported	not reported	-1	76	not reported	not reported	not reported	not reported	not reported	-1	-1	-1	not reported	not reported	not reported	not reported	not reported	not reported	not reported	3	not reported	-1	-1	1983	not reported	no	-1	-1
TCGA-55-8506	lung adenocarcinoma- not otherwise specified (nos)	22850	11	11	-1	alive	stage iib	female	white	not hispanic or latino	1950	no	-1	22850	not reported	not reported	not reported	mx	n0	t3	not reported	not reported	not reported	-1	62	not reported	not reported	not reported	not reported	not reported	-1	-1	-1	not reported	not reported	not reported	not reported	not reported	not reported	not reported	2	not reported	1972	-1	-1	not reported	no	-1	-1
TCGA-86-A4JF	lung adenocarcinoma- not otherwise specified (nos)	20491	536	0	737	dead	stage iib	male	white	not hispanic or latino	1956	no	-1	20491	not reported	not reported	not reported	m0	n0	t3	not reported	not reported	no	6	56	not reported	not reported	not reported	not reported	complete response	444	536	-1	not reported	chemotherapy	not reported	not reported	no	not reported	not reported	4	complete remission/response	-1	-1	2012	not reported	no	-1	-1
TCGA-91-6847	lung adenocarcinoma- not otherwise specified (nos)	22862	842	842	-1	alive	stage ib	female	white	not hispanic or latino	1940	not reported	-1	22862	not reported	not reported	not reported	mx	n0	t2	not reported	not reported	not reported	-1	62	not reported	not reported	not reported	not reported	not reported	-1	-1	-1	not reported	not reported	not reported	not reported	not reported	not reported	not reported	3	not reported	-1	-1	1967	not reported	no	-1	-1
TCGA-05-4430	lung adenocarcinoma mixed subtype	21884	761	761	-1	alive	stage ib	female	not reported	not reported	1949	not reported	-1	21884	not reported	not reported	not reported	m0	n0	t2	not reported	not reported	not reported	-1	59	not reported	not reported	not reported	not reported	not reported	-1	-1	-1	not reported	not reported	not reported	not reported	not reported	not reported	not reported	4	not reported	-1	80	-1	not reported	no	4.38356	-1
TCGA-50-5051	lung adenocarcinoma- not otherwise specified (nos)	15585	455	455	478	dead	stage iiia	female	white	not hispanic or latino	1965	not reported	-1	15585	not reported	not reported	not reported	m0	n2	t2	not reported	not reported	not reported	15	42	not reported	not reported	not reported	not reported	partial response	62	123	-1	not reported	chemotherapy	other	yes	yes	not reported	not reported	4	not reported	-1	30	2006	not reported	no	1.64384	-1
TCGA-78-7149	lung adenocarcinoma mixed subtype	26285	3940	1093	-1	alive	stage iiib	male	white	not reported	1931	not reported	-1	26285	not reported	not reported	not reported	m0	n0	t4	not reported	not reported	no	-1	71	not reported	not reported	not reported	not reported	not reported	-1	-1	-1	not reported	not reported	not reported	not reported	no	not reported	not reported	2	not reported	1950	115	-1	not reported	no	6.30137	-1
TCGA-44-2655	lung adenocarcinoma- not otherwise specified (nos)	23854	1324	575	-1	alive	stage ia	female	white	not hispanic or latino	1944	not reported	-1	23854	not reported	not reported	not reported	m0	n0	t1	not reported	not reported	not reported	-1	65	not reported	not reported	not reported	not reported	not reported	-1	-1	-1	not reported	not reported	not reported	not reported	not reported	not reported	not reported	3	not reported	1958	30	1988	not reported	no	1.64384	30
TCGA-NJ-A4YP	lung papillary adenocarcinoma	19106	50	50	-1	alive	stage ib	male	white	not hispanic or latino	1959	no	-1	19106	not reported	not reported	not reported	m0	n0	t2a	not reported	not reported	no	-1	52	not reported	not reported	not reported	not reported	not reported	-1	-1	-1	not reported	not reported	not reported	not reported	no	not reported	not reported	5	stable disease	-1	60	-1	no	no	3.28767	-1
TCGA-91-6829	lung bronchioloalveolar carcinoma nonmucinous	28841	-1	-1	1258	dead	stage ib	male	white	not hispanic or latino	1923	not reported	-1	28841	not reported	not reported	not reported	mx	n0	t2	not reported	not reported	not reported	-1	78	not reported	not reported	not reported	not reported	not reported	-1	-1	-1	not reported	not reported	not reported	not reported	not reported	not reported	not reported	4	not reported	1940	94	2003	not reported	no	5.17808	63
TCGA-55-8508	mucinous (colloid) carcinoma	22159	617	15	-1	alive	stage iia	female	black or african american	not hispanic or latino	1952	no	-1	22159	not reported	not reported	not reported	mx	n1	t2a	not reported	not reported	not reported	3	60	not reported	not reported	not reported	not reported	complete response	57	120	-1	not reported	chemotherapy	not reported	not reported	not reported	not reported	not reported	2	complete remission/response	-1	-1	-1	no	no	-1	-1
TCGA-55-A48Y	lung adenocarcinoma- not otherwise specified (nos)	25384	630	42	-1	alive	stage iia	male	white	not hispanic or latino	1943	no	-1	25384	not reported	not reported	not reported	m0	n0	t2b	not reported	not reported	not reported	30	69	not reported	not reported	not reported	not reported	complete response	91	163	-1	not reported	chemotherapy	not reported	not reported	not reported	not reported	not reported	2	not reported	1962	50	-1	not reported	no	2.73973	-1
TCGA-62-A46Y	lung adenocarcinoma mixed subtype	25905	-1	-1	414	dead	stage iiia	female	white	not hispanic or latino	1938	yes	314	25905	not reported	not reported	not reported	m0	n2	t2	not reported	not reported	no	25	70	not reported	not reported	not reported	not reported	complete response	74	256	-1	not reported	chemotherapy	not reported	not reported	no	not reported	not reported	1	complete remission/response	-1	-1	-1	yes	no	-1	-1
TCGA-64-5781	lung adenocarcinoma mixed subtype	20219	1559	1202	-1	alive	stage ib	female	white	not hispanic or latino	1952	not reported	-1	20219	not reported	not reported	not reported	m0	n0	t2	not reported	not reported	not reported	3	55	not reported	not reported	not reported	not reported	complete response	159	187	-1	not reported	chemotherapy	not reported	not reported	not reported	not reported	not reported	4	not reported	1982	25	2007	not reported	no	1.36986	25
TCGA-05-4389	lung adenocarcinoma mixed subtype	25660	1369	1369	-1	alive	stage ia	male	not reported	not reported	1935	not reported	-1	25660	not reported	not reported	not reported	m0	n0	t1	not reported	not reported	not reported	-1	70	not reported	not reported	not reported	not reported	not reported	-1	-1	-1	not reported	not reported	not reported	not reported	not reported	not reported	not reported	3	not reported	-1	43	-1	not reported	no	2.35616	-1
TCGA-69-7980	lung adenocarcinoma- not otherwise specified (nos)	25583	362	43	-1	alive	stage i	female	white	not hispanic or latino	1941	not reported	-1	25583	not reported	not reported	not reported	m0	n0	t1b	not reported	not reported	no	-1	70	not reported	not reported	not reported	not reported	not reported	-1	-1	-1	not reported	not reported	not reported	not reported	yes	not reported	other	4	not reported	-1	80	2001	not reported	no	4.38356	-1
TCGA-49-6743	lung clear cell adenocarcinoma	29807	1621	369	-1	alive	stage iiia	female	white	not reported	1929	not reported	-1	29807	not reported	not reported	not reported	mx	n2	t1	not reported	not reported	not reported	23	81	not reported	not reported	not reported	not reported	not reported	48	140	4	not reported	chemotherapy	not reported	not reported	not reported	not reported	not reported	4	not reported	-1	50	-1	not reported	no	2.73973	-1
TCGA-75-7030	lung adenocarcinoma- not otherwise specified (nos)	-1	-1	-1	-1	alive	stage iib	male	not reported	not reported	-1	not reported	-1	-1	not reported	not reported	not reported	m0	n0	t3	not reported	not reported	not reported	17	-1	not reported	not reported	not reported	not reported	not reported	-1	-1	4	not reported	chemotherapy	not reported	not reported	not reported	not reported	not reported	1	not reported	-1	-1	-1	not reported	no	-1	-1
TCGA-44-A479	lung adenocarcinoma- not otherwise specified (nos)	27024	486	256	-1	alive	stage ib	female	black or african american	not hispanic or latino	1939	no	-1	27024	not reported	not reported	not reported	mx	n0	t2	not reported	not reported	no	-1	73	not reported	not reported	not reported	not reported	not reported	-1	-1	-1	not reported	not reported	not reported	not reported	yes	not reported	not reported	4	complete remission/response	1962	40	2002	no	no	2.19178	40
TCGA-55-6986	lung bronchioloalveolar carcinoma nonmucinous	-1	3261	2151	-1	alive	stage ib	female	white	not reported	1930	not reported	-1	-1	not reported	not reported	not reported	m0	n0	t2	not reported	not reported	no	-1	74	not reported	not reported	not reported	not reported	not reported	-1	-1	-1	not reported	not reported	not reported	not reported	no	not reported	not reported	1	not reported	-1	-1	-1	not reported	no	-1	-1
TCGA-44-7659	lung adenocarcinoma- not otherwise specified (nos)	25730	691	299	-1	alive	stage ia	male	white	not hispanic or latino	1940	not reported	-1	25730	not reported	not reported	not reported	mx	n0	t1b	not reported	not reported	not reported	-1	70	not reported	not reported	not reported	not reported	not reported	-1	-1	-1	not reported	not reported	not reported	not reported	not reported	not reported	not reported	2	not reported	1989	40	-1	not reported	no	2.19178	-1
TCGA-73-4659	lung adenocarcinoma- not otherwise specified (nos)	24253	711	711	711	dead	stage iiia	male	white	not hispanic or latino	1940	not reported	-1	24253	not reported	not reported	not reported	m0	n2	t2	not reported	not reported	no	3	66	not reported	not reported	not reported	not reported	not reported	539	581	2	not reported	chemotherapy	not reported	not reported	no	not reported	not reported	3	not reported	1974	12	1986	not reported	no	0.657534	12
TCGA-05-4433	lung adenocarcinoma mixed subtype	30194	730	730	-1	alive	stage ib	male	not reported	not reported	1926	not reported	-1	30194	not reported	not reported	not reported	m0	n0	t2	not reported	not reported	not reported	-1	82	not reported	not reported	not reported	not reported	not reported	-1	-1	-1	not reported	not reported	not reported	not reported	not reported	not reported	not reported	3	not reported	1946	1	1948	not reported	no	0.0547945	2
TCGA-50-5066	lung adenocarcinoma mixed subtype	26385	1442	297	-1	alive	stage ib	male	black or african american	not hispanic or latino	1937	not reported	-1	26385	not reported	not reported	not reported	m0	n0	t2	not reported	not reported	yes	15	72	not reported	not reported	not reported	not reported	stable disease	508	567	-1	not reported	chemotherapy	not reported	no	yes	not reported	not reported	1	not reported	-1	-1	-1	not reported	no	-1	-1
TCGA-50-7109	lung adenocarcinoma- not otherwise specified (nos)	21979	255	255	308	dead	stage ia	male	white	not hispanic or latino	1951	not reported	-1	21979	not reported	not reported	not reported	m0	n0	t1	not reported	not reported	not reported	-1	60	not reported	not reported	not reported	not reported	not reported	-1	-1	-1	not reported	not reported	not reported	not reported	not reported	not reported	not reported	2	not reported	-1	120	-1	not reported	no	6.57534	-1
TCGA-55-8085	lung papillary adenocarcinoma	23596	904	33	-1	alive	stage ia	male	white	not hispanic or latino	1947	no	-1	23596	not reported	not reported	not reported	m0	n0	t1b	not reported	not reported	not reported	-1	64	not reported	not reported	not reported	not reported	not reported	-1	-1	-1	not reported	not reported	not reported	not reported	not reported	not reported	not reported	2	complete remission/response	-1	-1	-1	not reported	no	-1	-1
TCGA-NJ-A4YF	lung adenocarcinoma mixed subtype	18584	2161	1720	-1	alive	stage ia	female	black or african american	not hispanic or latino	1957	no	-1	18584	not reported	not reported	not reported	m0	n0	t1	not reported	not reported	no	-1	50	not reported	not reported	not reported	not reported	not reported	-1	-1	-1	not reported	not reported	not reported	not reported	no	not reported	not reported	3	not reported	-1	30	-1	not reported	no	1.64384	-1
TCGA-55-7576	lung adenocarcinoma- not otherwise specified (nos)	19917	670	40	-1	alive	stage ib	male	black or african american	not hispanic or latino	1957	not reported	-1	19917	not reported	not reported	not reported	m0	n0	t2a	not reported	not reported	not reported	17	54	not reported	not reported	not reported	not reported	complete response	104	168	-1	not reported	chemotherapy	not reported	not reported	not reported	not reported	not reported	2	not reported	1972	-1	-1	not reported	no	-1	-1
TCGA-MN-A4N4	lung adenocarcinoma- not otherwise specified (nos)	20888	1175	622	-1	alive	stage ia	male	white	not hispanic or latino	1953	no	-1	20888	not reported	not reported	not reported	m0	n0	t1b	not reported	not reported	no	-1	57	not reported	not reported	not reported	not reported	not reported	-1	-1	-1	not reported	not reported	not reported	not reported	no	not reported	not reported	2	complete remission/response	1980	-1	-1	no	no	-1	-1
TCGA-05-4405	lung adenocarcinoma mixed subtype	27241	610	610	-1	alive	stage ib	female	not reported	not reported	1932	not reported	-1	27241	not reported	not reported	not reported	m0	n0	t2	not reported	not reported	not reported	-1	74	not reported	not reported	not reported	not reported	not reported	-1	-1	-1	not reported	not reported	not reported	not reported	not reported	not reported	not reported	4	not reported	1951	65	1994	not reported	no	3.56164	43
TCGA-69-7974	lung adenocarcinoma mixed subtype	20021	184	184	-1	alive	stage iiia	female	white	not hispanic or latino	1957	not reported	-1	20021	not reported	not reported	not reported	mx	n2	t2a	not reported	not reported	not reported	9	54	not reported	not reported	not reported	not reported	clinical progressive disease	75	96	-1	not reported	chemotherapy	not reported	not reported	yes	not reported	other	4	not reported	1981	30	2011	not reported	no	1.64384	30
TCGA-69-7761	lung acinar adenocarcinoma	31041	186	186	-1	alive	stage ib	male	white	not hispanic or latino	1927	not reported	-1	31041	not reported	not reported	not reported	mx	n0	t2a	not reported	not reported	not reported	13	84	not reported	not reported	not reported	not reported	not reported	84	147	4	not reported	chemotherapy	not reported	not reported	yes	not reported	other	3	not reported	1955	20	1975	not reported	no	1.09589	20
TCGA-44-7661	lung adenocarcinoma- not otherwise specified (nos)	25483	366	153	557	dead	stage ib	female	white	not hispanic or latino	1942	not reported	-1	25483	not reported	not reported	not reported	m0	n0	t2a	not reported	not reported	yes	-1	69	not reported	not reported	not reported	not reported	not reported	-1	-1	-1	not reported	not reported	not reported	not reported	yes	not reported	not reported	3	not reported	1961	22	1976	not reported	no	1.20548	15
TCGA-MP-A4TK	lung adenocarcinoma- not otherwise specified (nos)	20581	-1	-1	582	dead	stage iib	female	not reported	not reported	1946	yes	397	20581	not reported	not reported	not reported	mx	n1	t2	not reported	not reported	no	-1	56	not reported	not reported	not reported	not reported	not reported	-1	-1	-1	not reported	not reported	not reported	not reported	no	not reported	not reported	4	complete remission/response	1971	28	1999	no	no	1.53425	28
TCGA-05-4244	lung adenocarcinoma- not otherwise specified (nos)	25752	0	0	-1	alive	stage iv	male	not reported	not reported	1939	not reported	-1	25752	not reported	not reported	not reported	m1	n2	t2	not reported	not reported	not reported	-1	70	not reported	not reported	not reported	not reported	not reported	-1	-1	-1	not reported	not reported	not reported	not reported	not reported	not reported	not reported	4	not reported	-1	38	-1	not reported	no	2.08219	-1
TCGA-55-7725	lung adenocarcinoma- not otherwise specified (nos)	24848	442	39	-1	alive	stage ia	female	white	not hispanic or latino	1943	not reported	-1	24848	not reported	not reported	not reported	mx	n0	t1a	not reported	not reported	no	-1	68	not reported	not reported	not reported	not reported	not reported	-1	-1	-1	not reported	not reported	not reported	not reported	no	not reported	not reported	3	not reported	1963	16	1994	not reported	no	0.876712	31
TCGA-78-7163	lung adenocarcinoma- not otherwise specified (nos)	22002	7248	6812	-1	alive	stage ib	male	white	not reported	1932	not reported	-1	22002	not reported	not reported	not reported	m0	n0	t2	not reported	not reported	no	-1	60	not reported	not reported	not reported	not reported	not reported	-1	-1	-1	not reported	not reported	not reported	not reported	no	not reported	not reported	4	not reported	1950	41	1991	not reported	no	2.24658	41
TCGA-05-4420	lung adenocarcinoma mixed subtype	15159	912	912	-1	alive	stage ib	male	not reported	not reported	1967	not reported	-1	15159	not reported	not reported	not reported	m0	n0	t2	not reported	not reported	not reported	-1	41	not reported	not reported	not reported	not reported	not reported	-1	-1	-1	not reported	not reported	not reported	not reported	not reported	not reported	not reported	2	not reported	-1	38	-1	not reported	no	2.08219	-1
TCGA-44-8117	lung adenocarcinoma- not otherwise specified (nos)	19855	385	259	-1	alive	stage ib	female	white	not hispanic or latino	1957	no	-1	19855	not reported	not reported	not reported	m0	n0	t2a	not reported	not reported	not reported	13	54	not reported	not reported	not reported	not reported	complete response	113	133	-1	not reported	chemotherapy	not reported	not reported	not reported	not reported	not reported	4	complete remission/response	1975	54	2011	no	no	2.9589	36
TCGA-64-5779	lung acinar adenocarcinoma	22305	864	507	-1	alive	stage iiia	male	white	not hispanic or latino	1948	not reported	-1	22305	not reported	not reported	not reported	m0	n2	t2	not reported	not reported	not reported	3	61	not reported	not reported	not reported	not reported	complete response	94	157	-1	not reported	chemotherapy	not reported	not reported	not reported	not reported	not reported	4	not reported	1969	40	2009	not reported	no	2.19178	40
TCGA-55-8097	lung adenocarcinoma- not otherwise specified (nos)	22260	476	15	-1	alive	stage ia	female	white	not hispanic or latino	1952	no	-1	22260	not reported	not reported	not reported	mx	n0	t1a	not reported	not reported	no	-1	60	not reported	not reported	not reported	not reported	not reported	-1	-1	-1	not reported	not reported	not reported	not reported	no	not reported	not reported	4	complete remission/response	1973	35	2008	not reported	no	1.91781	35
TCGA-99-8033	lung adenocarcinoma- not otherwise specified (nos)	27342	170	170	656	dead	stage iv	female	white	not hispanic or latino	1937	no	-1	27342	not reported	not reported	not reported	m1	nx	tx	not reported	not reported	no	18	74	not reported	not reported	not reported	not reported	not reported	107	-1	-1	not reported	chemotherapy	not reported	no	yes	not reported	not reported	1	not reported	-1	-1	-1	no	no	-1	-1
TCGA-50-6591	lung adenocarcinoma- not otherwise specified (nos)	23067	-1	-1	119	dead	stage iv	female	white	not hispanic or latino	1944	not reported	-1	23067	not reported	not reported	not reported	m1	n0	t2	not reported	not reported	not reported	-1	63	not reported	not reported	not reported	not reported	not reported	-1	-1	-1	not reported	not reported	not reported	not reported	not reported	not reported	not reported	1	not reported	-1	-1	-1	not reported	no	-1	-1
TCGA-78-7536	lung adenocarcinoma- not otherwise specified (nos)	25558	-1	-1	244	dead	stage iiia	male	white	not reported	1932	not reported	-1	25558	not reported	not reported	not reported	m0	n2	t2	not reported	not reported	no	-1	69	not reported	not reported	not reported	not reported	not reported	-1	-1	-1	not reported	not reported	not reported	not reported	no	not reported	not reported	4	not reported	1949	44	1993	not reported	no	2.41096	44
TCGA-97-7554	lung papillary adenocarcinoma	30327	775	264	-1	alive	stage iiia	female	white	not hispanic or latino	1927	not reported	-1	30327	not reported	not reported	not reported	m0	n2	t2a	not reported	not reported	not reported	21	83	not reported	not reported	not reported	not reported	not reported	49	111	4	not reported	chemotherapy	g12v	yes	not reported	not reported	not reported	3	not reported	1945	30	1983	not reported	no	1.64384	38
TCGA-55-A4DF	lung adenocarcinoma- not otherwise specified (nos)	32432	47	47	614	dead	stage ia	male	white	not hispanic or latino	1924	no	-1	32432	not reported	not reported	not reported	mx	n0	t1b	not reported	not reported	not reported	-1	88	not reported	not reported	not reported	not reported	not reported	-1	-1	-1	not reported	not reported	not reported	not reported	not reported	not reported	not reported	3	complete remission/response	-1	60	1984	no	no	3.28767	-1
TCGA-78-7152	lung adenocarcinoma mixed subtype	23782	1202	1202	1215	dead	stage ib	male	white	not reported	1938	not reported	-1	23782	not reported	not reported	not reported	m0	n0	t2	not reported	not reported	no	-1	65	not reported	not reported	not reported	not reported	not reported	-1	-1	-1	not reported	not reported	not reported	not reported	no	not reported	not reported	4	not reported	1959	40	1999	not reported	no	2.19178	40
TCGA-49-4487	lung adenocarcinoma- not otherwise specified (nos)	26583	-1	-1	855	dead	stage ia	female	white	not hispanic or latino	1920	not reported	-1	26583	not reported	not reported	not reported	m0	n0	t1	not reported	not reported	not reported	-1	72	not reported	not reported	not reported	not reported	not reported	-1	-1	-1	not reported	not reported	not reported	not reported	not reported	not reported	not reported	4	not reported	-1	40	-1	not reported	no	2.19178	-1
TCGA-05-4382	lung adenocarcinoma mixed subtype	24868	607	607	-1	alive	stage ib	male	not reported	not reported	1941	not reported	-1	24868	not reported	not reported	not reported	m0	n0	t2	not reported	not reported	not reported	-1	68	not reported	not reported	not reported	not reported	not reported	-1	-1	-1	not reported	not reported	not reported	not reported	not reported	not reported	not reported	4	not reported	-1	62	-1	not reported	no	3.39726	-1
TCGA-99-7458	lung bronchioloalveolar carcinoma nonmucinous	27359	747	251	-1	alive	stage iiia	female	white	not hispanic or latino	1936	not reported	-1	27359	not reported	not reported	not reported	m0	n0	t4	not reported	not reported	yes	-1	74	rt-pcr	not reported	not reported	not reported	not reported	-1	-1	-1	not reported	not reported	g12a	yes	yes	not reported	not reported	4	not reported	1958	52	2010	not reported	no	2.84932	52
TCGA-75-6203	lung adenocarcinoma- not otherwise specified (nos)	-1	-1	-1	-1	alive	stage iiia	female	not reported	not reported	-1	not reported	-1	-1	not reported	not reported	not reported	m0	n2	t2	not reported	not reported	not reported	15	-1	not reported	not reported	not reported	not reported	not reported	-1	-1	8	not reported	chemotherapy	not reported	not reported	not reported	not reported	not reported	1	not reported	-1	-1	-1	not reported	no	-1	-1
TCGA-MP-A4T9	lung adenocarcinoma- not otherwise specified (nos)	19767	-1	-1	1265	dead	stage iiia	female	white	not hispanic or latino	1952	yes	341	19767	not reported	not reported	not reported	mx	n2	t2	not reported	not reported	no	15	54	not reported	not reported	not reported	not reported	complete response	62	62	-1	not reported	chemotherapy	not reported	not reported	no	not reported	not reported	4	complete remission/response	1980	24	2004	yes	no	1.31507	24
TCGA-97-8179	lung acinar adenocarcinoma	26305	435	15	-1	alive	stage ia	male	white	not hispanic or latino	1940	no	-1	26305	not reported	not reported	not reported	m0	n0	t1a	not reported	not reported	yes	-1	72	fish	not reported	not reported	not reported	not reported	-1	-1	-1	not reported	not reported	not reported	no	yes	not reported	not reported	3	complete remission/response	1958	60	1988	no	no	3.28767	30
TCGA-55-7283	lung bronchioloalveolar carcinoma nonmucinous	27946	609	35	-1	alive	stage iiia	female	white	not hispanic or latino	1935	not reported	-1	27946	not reported	not reported	not reported	mx	n2	t3	not reported	not reported	no	21	76	not reported	not reported	not reported	not reported	partial response	83	386	-1	not reported	chemotherapy	not reported	not reported	no	not reported	not reported	3	not reported	1950	5	1961	not reported	no	0.273973	11
TCGA-69-7973	lung adenocarcinoma mixed subtype	15355	230	230	-1	alive	stage ib	female	white	not hispanic or latino	1969	not reported	-1	15355	not reported	not reported	not reported	m0	n0	t2a	not reported	not reported	not reported	9	42	not reported	not reported	not reported	not reported	complete response	91	132	-1	not reported	chemotherapy	not reported	not reported	yes	not reported	not reported	4	not reported	-1	25	2011	not reported	no	1.36986	-1
TCGA-44-3919	lung adenocarcinoma- not otherwise specified (nos)	26081	190	190	1026	dead	stage ia	female	white	not hispanic or latino	1939	not reported	-1	26081	not reported	not reported	not reported	m0	n0	t1	not reported	not reported	not reported	-1	71	not reported	not reported	not reported	not reported	not reported	-1	-1	-1	not reported	not reported	not reported	not reported	not reported	not reported	not reported	1	not reported	-1	-1	-1	not reported	no	-1	-1
TCGA-78-8662	lung adenocarcinoma- not otherwise specified (nos)	19563	-1	-1	3361	dead	stage ib	female	not reported	not reported	1947	yes	3044	19563	not reported	not reported	not reported	m0	n0	t2	not reported	not reported	no	-1	53	not reported	not reported	not reported	not reported	not reported	-1	-1	-1	not reported	not reported	not reported	not reported	no	not reported	not reported	2	complete remission/response	1964	45	-1	no	no	2.46575	-1
TCGA-97-8547	lung adenocarcinoma mixed subtype	28801	657	148	-1	alive	stage iiia	female	not reported	not reported	1934	no	-1	28801	not reported	not reported	not reported	mx	n2	t2a	not reported	not reported	no	27	78	not reported	not reported	not reported	not reported	not reported	124	-1	-1	not reported	not reported	not reported	no	yes	not reported	exon 19 deletion	1	complete remission/response	-1	-1	-1	no	no	-1	-1
TCGA-55-8615	lung adenocarcinoma- not otherwise specified (nos)	24786	446	15	-1	alive	stage iiia	male	white	not hispanic or latino	1945	no	-1	24786	not reported	not reported	not reported	mx	n2	t3	not reported	not reported	not reported	30	67	not reported	not reported	not reported	not reported	clinical progressive disease	234	416	-1	not reported	chemotherapy	not reported	not reported	not reported	not reported	not reported	2	complete remission/response	1966	67	-1	no	no	3.67123	-1
TCGA-67-6216	lung adenocarcinoma- not otherwise specified (nos)	20967	141	141	-1	alive	stage ia	female	white	not hispanic or latino	1953	not reported	-1	20967	not reported	not reported	not reported	m0	n0	t1a	not reported	not reported	no	-1	57	not reported	not reported	not reported	not reported	not reported	-1	-1	-1	not reported	not reported	not reported	not reported	no	not reported	not reported	1	not reported	-1	-1	-1	not reported	no	-1	-1
TCGA-64-1680	lung adenocarcinoma mixed subtype	23267	1126	1126	-1	alive	stage iv	male	white	not hispanic or latino	1944	not reported	-1	23267	not reported	not reported	not reported	m1	n2	t2a	not reported	not reported	not reported	-1	63	not reported	not reported	not reported	not reported	not reported	-1	-1	-1	not reported	not reported	not reported	not reported	not reported	not reported	not reported	3	not reported	1962	50	1982	not reported	no	2.73973	20
TCGA-97-7546	lung acinar adenocarcinoma	27913	1285	964	-1	alive	stage ia	female	white	not hispanic or latino	1932	not reported	-1	27913	not reported	not reported	not reported	mx	n0	t1	not reported	not reported	not reported	-1	76	not reported	not reported	not reported	not reported	not reported	-1	-1	-1	not reported	not reported	not reported	not reported	not reported	not reported	not reported	3	not reported	1963	25	1983	not reported	no	1.36986	20
TCGA-50-8457	lung adenocarcinoma mixed subtype	23055	1125	44	-1	alive	stage ia	female	black or african american	not hispanic or latino	1948	no	-1	23055	not reported	not reported	not reported	m0	n0	t1a	not reported	not reported	yes	-1	63	fish	not reported	not reported	not reported	not reported	-1	-1	-1	not reported	not reported	g12a	yes	yes	not reported	not reported	4	complete remission/response	-1	30	1997	no	no	1.64384	-1
TCGA-99-8032	lung adenocarcinoma- not otherwise specified (nos)	22635	44	44	-1	alive	stage ia	male	white	not hispanic or latino	1950	not reported	-1	22635	not reported	not reported	not reported	m0	n0	t1a	not reported	not reported	no	-1	61	not reported	not reported	not reported	not reported	not reported	-1	-1	-1	not reported	not reported	g12c	yes	yes	not reported	not reported	2	complete remission/response	1966	90	-1	no	no	4.93151	-1
TCGA-55-5899	lung adenocarcinoma- not otherwise specified (nos)	-1	930	87	-1	alive	not reported	male	white	not hispanic or latino	1952	not reported	-1	-1	not reported	not reported	not reported	m0	n1	t1a	not reported	not reported	not reported	15	58	not reported	not reported	not reported	not reported	complete response	146	208	-1	not reported	chemotherapy	not reported	not reported	not reported	not reported	not reported	2	not reported	1985	-1	-1	not reported	no	-1	-1
TCGA-91-A4BC	lung adenocarcinoma- not otherwise specified (nos)	21565	44	44	-1	alive	stage iia	male	white	not hispanic or latino	1953	not reported	-1	21565	not reported	not reported	not reported	mx	n0	t2b	not reported	not reported	not reported	-1	59	not reported	not reported	not reported	not reported	not reported	-1	-1	-1	not reported	not reported	not reported	not reported	no	not reported	not reported	4	not reported	1976	30	2001	not reported	no	1.64384	25
TCGA-50-5055	lung adenocarcinoma mixed subtype	28988	785	785	1830	dead	stage iia	female	white	not hispanic or latino	1929	not reported	-1	28988	not reported	not reported	not reported	m0	n1	t1	not reported	not reported	not reported	27	79	not reported	not reported	not reported	not reported	clinical progressive disease	1649	-1	-1	not reported	chemotherapy	not reported	no	yes	not reported	not reported	-1	not reported	-1	-1	-1	not reported	no	-1	-1
TCGA-86-8671	lung papillary adenocarcinoma	26448	839	18	-1	alive	stage iib	female	white	not hispanic or latino	1940	not reported	-1	26448	not reported	not reported	not reported	m0	n1	t2b	not reported	not reported	not reported	2	72	not reported	not reported	not reported	not reported	complete response	18	104	-1	not reported	chemotherapy	not reported	not reported	not reported	not reported	not reported	1	complete remission/response	-1	-1	-1	not reported	no	-1	-1
TCGA-62-8402	lung adenocarcinoma mixed subtype	26934	1445	1445	1498	dead	stage iiia	female	white	not hispanic or latino	1935	yes	772	26934	not reported	not reported	not reported	m0	n2	t2	not reported	not reported	no	-1	73	not reported	not reported	not reported	not reported	not reported	-1	-1	-1	not reported	not reported	not reported	not reported	yes	not reported	exon 19 deletion	1	complete remission/response	-1	-1	-1	yes	no	-1	-1
TCGA-MP-A4T7	lung adenocarcinoma- not otherwise specified (nos)	27603	-1	-1	167	dead	stage iv	female	not reported	not reported	1930	not reported	-1	27603	not reported	not reported	not reported	m1	n0	t2	not reported	not reported	no	-1	75	not reported	not reported	not reported	not reported	not reported	-1	-1	-1	not reported	not reported	not reported	not reported	no	not reported	not reported	4	not reported	1954	50	2004	no	no	2.73973	50
TCGA-50-5946	lung adenocarcinoma mixed subtype	22852	1617	349	-1	alive	stage ia	male	white	not reported	1948	not reported	-1	22852	not reported	not reported	not reported	mx	n0	t1	not reported	not reported	not reported	-1	62	not reported	not reported	not reported	not reported	not reported	-1	-1	-1	not reported	not reported	not reported	not reported	not reported	not reported	not reported	4	not reported	-1	-1	2009	not reported	no	-1	-1
TCGA-75-7025	lung adenocarcinoma- not otherwise specified (nos)	-1	3305	-1	-1	alive	stage ib	male	not reported	not reported	-1	not reported	-1	-1	not reported	not reported	not reported	m0	n0	t2	not reported	not reported	not reported	-1	-1	not reported	not reported	not reported	not reported	not reported	-1	-1	-1	not reported	not reported	not reported	not reported	not reported	not reported	not reported	3	not reported	1967	-1	1986	not reported	no	-1	19
TCGA-64-1676	lung adenocarcinoma- not otherwise specified (nos)	21428	1728	1728	-1	alive	stage ia	male	white	not hispanic or latino	1947	not reported	-1	21428	not reported	not reported	not reported	m0	n0	t1a	not reported	not reported	not reported	-1	58	not reported	not reported	not reported	not reported	not reported	-1	-1	-1	not reported	not reported	not reported	not reported	not reported	not reported	not reported	2	not reported	-1	60	-1	not reported	no	3.28767	-1
TCGA-50-5930	lung adenocarcinoma mixed subtype	17238	-1	-1	282	dead	stage iiia	male	white	not hispanic or latino	1954	not reported	-1	17238	not reported	not reported	not reported	m0	n2	t2	not reported	not reported	not reported	-1	47	not reported	not reported	not reported	not reported	not reported	-1	-1	-1	not reported	not reported	not reported	not reported	not reported	not reported	not reported	-1	not reported	-1	-1	-1	not reported	no	-1	-1
TCGA-44-2661	lung adenocarcinoma- not otherwise specified (nos)	25313	1159	103	-1	alive	stage ia	female	white	not hispanic or latino	1940	not reported	-1	25313	not reported	not reported	not reported	m0	n0	t1	not reported	not reported	not reported	-1	69	not reported	not reported	not reported	not reported	not reported	-1	-1	-1	not reported	not reported	not reported	not reported	not reported	not reported	not reported	1	not reported	-1	-1	-1	not reported	no	-1	-1
TCGA-55-A48Z	lung adenocarcinoma mixed subtype	22056	651	29	-1	alive	stage iiib	female	white	not hispanic or latino	1952	no	-1	22056	not reported	not reported	not reported	mx	n3	t1a	not reported	not reported	yes	30	60	fish	not reported	not reported	not reported	stable disease	58	202	-1	not reported	chemotherapy	not reported	no	yes	not reported	other	4	not reported	1972	40	2012	not reported	no	2.19178	40
TCGA-62-A472	lung adenocarcinoma- not otherwise specified (nos)	25893	910	540	-1	alive	stage iib	male	white	not hispanic or latino	1941	yes	290	25893	not reported	not reported	not reported	m0	n0	t3	not reported	not reported	no	-1	70	not reported	not reported	not reported	not reported	not reported	-1	-1	-1	not reported	not reported	not reported	not reported	no	not reported	not reported	2	complete remission/response	-1	60	-1	no	no	3.28767	-1
TCGA-49-4510	lung adenocarcinoma- not otherwise specified (nos)	18762	-1	-1	896	dead	stage iib	female	black or african american	not hispanic or latino	1950	not reported	-1	18762	not reported	not reported	not reported	m0	n1	t2	not reported	not reported	not reported	-1	51	not reported	not reported	not reported	not reported	not reported	-1	-1	-1	not reported	not reported	not reported	not reported	not reported	not reported	not reported	2	not reported	-1	55	-1	not reported	no	3.0411	-1
TCGA-62-A46O	lung adenocarcinoma- not otherwise specified (nos)	24050	-1	-1	1454	dead	stage ib	female	white	not hispanic or latino	1941	yes	943	24050	not reported	not reported	not reported	m0	n0	t2	not reported	not reported	no	-1	65	not reported	not reported	not reported	not reported	not reported	-1	-1	-1	not reported	not reported	not reported	not reported	no	not reported	not reported	2	complete remission/response	-1	48	-1	no	no	2.63014	-1
TCGA-86-8076	lung papillary adenocarcinoma	15605	993	26	-1	alive	stage ia	male	white	not hispanic or latino	1969	not reported	-1	15605	not reported	not reported	not reported	m0	n0	t1	not reported	not reported	no	25	42	not reported	not reported	not reported	not reported	complete response	40	193	-1	not reported	chemotherapy	not reported	not reported	no	not reported	not reported	1	not reported	-1	-1	-1	not reported	no	-1	-1
TCGA-75-5146	lung adenocarcinoma- not otherwise specified (nos)	-1	2368	-1	-1	alive	stage ib	male	not reported	not reported	-1	not reported	-1	-1	not reported	not reported	not reported	m0	n0	t2	not reported	not reported	no	-1	-1	not reported	not reported	not reported	not reported	not reported	-1	-1	-1	not reported	not reported	not reported	not reported	no	not reported	not reported	3	not reported	-1	-1	1987	not reported	no	-1	-1
TCGA-78-8648	lung adenocarcinoma- not otherwise specified (nos)	21443	-1	-1	1209	dead	stage iib	female	not reported	not reported	1944	yes	720	21443	not reported	not reported	not reported	m0	n0	t3	not reported	not reported	no	-1	58	not reported	not reported	not reported	not reported	not reported	-1	-1	-1	not reported	not reported	not reported	not reported	no	not reported	not reported	2	not reported	1971	45	-1	no	no	2.46575	-1
TCGA-55-8092	lung adenocarcinoma- not otherwise specified (nos)	27597	26	26	154	dead	stage iib	male	white	not hispanic or latino	1937	no	-1	27597	not reported	not reported	not reported	mx	n0	t3	not reported	not reported	not reported	-1	75	not reported	not reported	not reported	not reported	not reported	-1	-1	-1	not reported	not reported	not reported	not reported	not reported	not reported	not reported	4	complete remission/response	1972	40	2012	not reported	no	2.19178	40
TCGA-97-7941	lung acinar adenocarcinoma	26298	484	22	-1	alive	stage ia	female	white	not hispanic or latino	1939	not reported	-1	26298	not reported	not reported	not reported	mx	n0	t1b	not reported	not reported	no	-1	72	not reported	not reported	not reported	not reported	not reported	-1	-1	-1	not reported	not reported	g12a	yes	yes	not reported	not reported	3	not reported	1960	22	1985	not reported	no	1.23288	25
TCGA-MP-A4T6	lung adenocarcinoma- not otherwise specified (nos)	27993	-1	-1	1790	dead	stage iiia	female	white	not hispanic or latino	1929	no	-1	27993	not reported	not reported	not reported	mx	n2	t1	not reported	not reported	no	-1	76	not reported	not reported	not reported	not reported	not reported	-1	-1	-1	not reported	not reported	not reported	not reported	no	not reported	not reported	3	complete remission/response	-1	50	1989	no	no	2.73973	-1
TCGA-55-8512	lung bronchioloalveolar carcinoma nonmucinous	15266	3	3	607	dead	stage iv	male	white	not hispanic or latino	1971	no	-1	15266	not reported	not reported	not reported	m1b	n1	t1a	not reported	not reported	not reported	-1	41	not reported	not reported	not reported	not reported	not reported	-1	-1	-1	not reported	not reported	not reported	not reported	not reported	not reported	not reported	2	not reported	1989	19	-1	not reported	no	1.0411	-1
TCGA-55-8299	lung adenocarcinoma- not otherwise specified (nos)	22626	216	216	469	dead	stage ia	female	white	not hispanic or latino	1951	no	-1	22626	not reported	not reported	not reported	mx	n0	t1b	not reported	not reported	not reported	-1	61	not reported	not reported	not reported	not reported	not reported	-1	-1	-1	not reported	not reported	not reported	not reported	not reported	not reported	not reported	4	complete remission/response	1971	20	2012	no	no	1.09589	41
TCGA-86-8074	lung adenocarcinoma- not otherwise specified (nos)	22862	24	24	-1	alive	stage iia	female	white	not hispanic or latino	1949	not reported	-1	22862	not reported	not reported	not reported	m0	n1	t1b	not reported	not reported	no	-1	62	not reported	not reported	not reported	not reported	not reported	-1	-1	-1	not reported	not reported	not reported	not reported	no	not reported	not reported	2	not reported	1970	40	-1	not reported	no	2.19178	-1
TCGA-73-4675	lung adenocarcinoma- not otherwise specified (nos)	21614	40	40	922	dead	stage iiia	male	white	not hispanic or latino	1951	not reported	-1	21614	not reported	not reported	not reported	m0	n1	t3	not reported	not reported	no	17	59	not reported	not reported	not reported	not reported	clinical progressive disease	592	676	-1	not reported	chemotherapy	not reported	not reported	no	not reported	not reported	4	not reported	1969	41	2010	not reported	no	2.24658	41
TCGA-05-5423	lung adenocarcinoma mixed subtype	23863	151	151	-1	alive	stage iib	male	not reported	not reported	1941	not reported	-1	23863	not reported	not reported	not reported	m0	n1	t2	not reported	not reported	not reported	-1	65	not reported	not reported	not reported	not reported	not reported	-1	-1	-1	not reported	not reported	not reported	not reported	not reported	not reported	not reported	3	not reported	1956	72	1980	not reported	no	3.94521	24
TCGA-97-A4M6	lung adenocarcinoma mixed subtype	16764	568	185	-1	alive	stage ia	female	white	not hispanic or latino	1967	no	-1	16764	not reported	not reported	not reported	m0	n0	t1a	not reported	not reported	no	-1	45	not reported	not reported	not reported	not reported	not reported	-1	-1	-1	not reported	not reported	not reported	no	yes	not reported	exon 19 deletion	1	complete remission/response	-1	-1	-1	no	no	-1	-1
TCGA-MP-A4SV	lung adenocarcinoma- not otherwise specified (nos)	24516	-1	-1	2620	dead	stage ib	male	not reported	not reported	1934	not reported	-1	24516	not reported	not reported	not reported	m0	n0	t2	not reported	not reported	no	-1	67	not reported	not reported	not reported	not reported	not reported	-1	-1	-1	not reported	not reported	not reported	not reported	no	not reported	not reported	2	complete remission/response	1946	110	-1	no	no	6.0274	-1
TCGA-44-A47B	lung adenocarcinoma- not otherwise specified (nos)	28869	287	105	-1	alive	stage ib	male	white	not hispanic or latino	1933	no	-1	28869	not reported	not reported	not reported	m0	n0	t2a	not reported	not reported	no	-1	79	not reported	not reported	not reported	not reported	not reported	-1	-1	-1	not reported	not reported	not reported	not reported	no	not reported	not reported	3	complete remission/response	1956	4	1965	no	no	0.246575	9
TCGA-93-A4JQ	lung acinar adenocarcinoma	17951	526	100	-1	alive	stage ia	male	white	not hispanic or latino	1963	no	-1	17951	not reported	not reported	not reported	mx	n0	t1b	not reported	not reported	no	-1	49	not reported	not reported	not reported	not reported	not reported	-1	-1	-1	not reported	not reported	not reported	not reported	no	not reported	not reported	3	complete remission/response	1973	-1	1993	no	no	-1	20
TCGA-05-4249	lung adenocarcinoma- not otherwise specified (nos)	24532	1523	1158	-1	alive	stage ib	male	not reported	not reported	1940	not reported	-1	24532	not reported	not reported	not reported	m0	n0	t2	not reported	not reported	not reported	-1	67	not reported	not reported	not reported	not reported	not reported	-1	-1	-1	not reported	not reported	not reported	not reported	not reported	not reported	not reported	3	not reported	-1	52	-1	not reported	no	2.84932	-1
TCGA-MP-A4TE	lung adenocarcinoma- not otherwise specified (nos)	20627	-1	-1	896	dead	stage iia	male	white	not hispanic or latino	1954	yes	226	20627	not reported	not reported	not reported	mx	n0	t2b	not reported	not reported	no	-1	56	not reported	not reported	not reported	not reported	not reported	-1	-1	-1	not reported	not reported	g12c	yes	no	not reported	not reported	4	complete remission/response	1970	40	2010	no	no	2.19178	40
TCGA-78-7159	lung adenocarcinoma mixed subtype	22261	1974	1221	-1	alive	stage ia	female	white	not reported	1948	not reported	-1	22261	not reported	not reported	not reported	m0	nx	t1	not reported	not reported	no	-1	60	not reported	not reported	not reported	not reported	not reported	-1	-1	-1	not reported	not reported	not reported	not reported	no	not reported	not reported	4	not reported	1965	21	2007	not reported	no	1.15068	42
TCGA-91-7771	lung adenocarcinoma- not otherwise specified (nos)	22926	492	31	-1	alive	stage iib	male	white	not hispanic or latino	1949	not reported	-1	22926	not reported	not reported	not reported	mx	n0	t3	not reported	not reported	not reported	6	62	not reported	not reported	not reported	not reported	complete response	77	156	-1	not reported	chemotherapy	not reported	not reported	no	not reported	not reported	4	not reported	-1	75	2011	not reported	no	4.10959	-1
TCGA-55-7728	mucinous (colloid) carcinoma	23505	704	24	-1	alive	stage ib	female	white	not hispanic or latino	1947	not reported	-1	23505	not reported	not reported	not reported	mx	n0	t2a	not reported	not reported	no	-1	64	not reported	not reported	not reported	not reported	not reported	-1	-1	-1	not reported	not reported	not reported	not reported	no	not reported	not reported	4	not reported	1980	30	1996	not reported	no	1.64384	16
TCGA-55-7907	lung adenocarcinoma- not otherwise specified (nos)	28201	16	16	343	dead	stage iia	male	white	not hispanic or latino	1934	not reported	-1	28201	not reported	not reported	not reported	mx	n1	t2a	not reported	not reported	not reported	-1	77	not reported	not reported	not reported	not reported	not reported	-1	-1	-1	not reported	not reported	not reported	not reported	not reported	not reported	not reported	3	not reported	1954	80	1994	not reported	no	4.38356	40
TCGA-78-7158	lung adenocarcinoma mixed subtype	21742	-1	-1	179	dead	stage iiib	female	white	not reported	1948	not reported	-1	21742	not reported	not reported	not reported	m0	n2	t4	not reported	not reported	no	29	59	not reported	not reported	not reported	not reported	not reported	54	103	3	not reported	chemotherapy	not reported	not reported	no	not reported	not reported	4	not reported	1963	14	2005	not reported	no	0.767123	42
TCGA-62-A46U	lung adenocarcinoma mixed subtype	25998	2067	1708	-1	alive	stage iib	female	white	not hispanic or latino	1936	no	-1	25998	not reported	not reported	not reported	m0	n1	t2	not reported	not reported	no	25	71	not reported	not reported	not reported	not reported	complete response	71	161	-1	not reported	chemotherapy	not reported	not reported	no	not reported	not reported	1	complete remission/response	-1	-1	-1	no	no	-1	-1
TCGA-05-4417	lung adenocarcinoma mixed subtype	18780	455	455	-1	alive	stage ib	female	not reported	not reported	1957	not reported	-1	18780	not reported	not reported	not reported	m0	n0	t2	not reported	not reported	not reported	-1	51	not reported	not reported	not reported	not reported	not reported	-1	-1	-1	not reported	not reported	not reported	not reported	not reported	not reported	not reported	4	not reported	1971	56	2008	not reported	no	3.06849	37
TCGA-86-8054	lung acinar adenocarcinoma	22584	1148	19	-1	alive	stage iib	male	white	not hispanic or latino	1950	not reported	-1	22584	not reported	not reported	not reported	m0	n1	t2b	not reported	not reported	no	12	61	not reported	not reported	not reported	not reported	complete response	65	136	-1	not reported	chemotherapy	not reported	not reported	no	not reported	not reported	2	not reported	1994	9	-1	not reported	no	0.493151	-1
TCGA-93-8067	lung adenocarcinoma- not otherwise specified (nos)	28453	186	186	-1	alive	stage ib	male	asian	not hispanic or latino	1934	no	-1	28453	not reported	not reported	not reported	mx	n0	t2a	not reported	not reported	no	-1	77	not reported	not reported	not reported	not reported	not reported	-1	-1	-1	not reported	not reported	not reported	not reported	no	not reported	not reported	4	complete remission/response	1961	20	2001	no	no	1.09589	40
TCGA-97-8176	lung acinar adenocarcinoma	23170	252	252	468	dead	stage iiia	male	white	not hispanic or latino	1949	yes	39	23170	not reported	not reported	not reported	m0	n1	t3	not reported	not reported	no	3	63	not reported	not reported	not reported	not reported	not reported	77	417	-1	not reported	ancillary	g12s	yes	yes	not reported	not reported	4	not reported	1971	40	2011	yes	no	2.19178	40
TCGA-78-7161	lung adenocarcinoma mixed subtype	25294	215	215	291	dead	stage iib	female	white	not reported	1942	not reported	-1	25294	not reported	not reported	not reported	m0	n0	t3	not reported	not reported	no	25	69	not reported	not reported	not reported	not reported	not reported	40	132	4	not reported	chemotherapy	not reported	not reported	yes	not reported	not reported	4	not reported	1961	27	1998	not reported	no	1.52329	37
TCGA-69-8254	lung adenocarcinoma mixed subtype	31134	409	77	-1	alive	not reported	male	white	not hispanic or latino	1927	no	-1	31134	not reported	not reported	not reported	not reported	not reported	t2b	not reported	not reported	no	-1	85	not reported	not reported	not reported	not reported	not reported	-1	-1	-1	not reported	not reported	not reported	not reported	yes	not reported	other	3	complete remission/response	-1	40	1989	no	no	2.19178	-1
TCGA-78-7148	lung adenocarcinoma mixed subtype	25990	-1	-1	626	dead	stage iib	male	white	not reported	1930	not reported	-1	25990	not reported	not reported	not reported	m0	n1	t2	not reported	not reported	no	-1	71	not reported	not reported	not reported	not reported	not reported	-1	-1	-1	not reported	not reported	not reported	not reported	no	not reported	not reported	2	not reported	1944	57	-1	not reported	no	3.12329	-1
TCGA-95-7562	lung adenocarcinoma- not otherwise specified (nos)	26000	-1	-1	87	dead	stage iia	male	black or african american	not hispanic or latino	1940	no	-1	26000	not reported	not reported	not reported	m0	n1	t2a	not reported	not reported	not reported	26	71	not reported	not reported	not reported	not reported	not reported	60	81	-1	not reported	chemotherapy	not reported	not reported	not reported	not reported	not reported	3	not reported	1973	10	1983	no	no	0.547945	10
TCGA-86-A4P7	lung adenocarcinoma- not otherwise specified (nos)	23330	415	14	-1	alive	stage ib	female	white	not hispanic or latino	1949	not reported	-1	23330	not reported	not reported	not reported	m0	n0	t2a	not reported	not reported	no	-1	63	not reported	not reported	not reported	not reported	not reported	-1	-1	-1	not reported	not reported	not reported	not reported	no	not reported	not reported	1	complete remission/response	-1	-1	-1	not reported	no	-1	-1
TCGA-49-6745	lung adenocarcinoma- not otherwise specified (nos)	30133	522	156	-1	alive	stage iiia	male	white	not reported	1929	not reported	-1	30133	not reported	not reported	not reported	m0	n2	t2a	not reported	not reported	not reported	-1	82	not reported	not reported	not reported	not reported	not reported	-1	-1	-1	not reported	not reported	not reported	no	yes	not reported	not reported	4	not reported	-1	20	-1	not reported	no	1.09589	-1
TCGA-05-5715	lung adenocarcinoma mixed subtype	25383	62	62	-1	alive	stage ib	female	not reported	not reported	1941	not reported	-1	25383	not reported	not reported	not reported	m0	n0	t2a	not reported	not reported	not reported	-1	69	not reported	not reported	not reported	not reported	not reported	-1	-1	-1	not reported	not reported	not reported	not reported	not reported	not reported	not reported	1	not reported	-1	-1	-1	not reported	no	-1	-1
TCGA-55-8090	lung adenocarcinoma- not otherwise specified (nos)	29235	6	6	598	dead	stage ia	male	white	not hispanic or latino	1931	no	-1	29235	not reported	not reported	not reported	m0	n0	t1a	not reported	not reported	not reported	-1	80	not reported	not reported	not reported	not reported	not reported	-1	-1	-1	not reported	not reported	not reported	not reported	not reported	not reported	not reported	2	complete remission/response	-1	-1	-1	not reported	no	-1	-1
TCGA-50-6597	lung adenocarcinoma- not otherwise specified (nos)	29195	1015	1015	1268	dead	stage ib	female	white	not hispanic or latino	1928	not reported	-1	29195	not reported	not reported	not reported	m0	n0	t2	not reported	not reported	not reported	-1	79	not reported	not reported	not reported	not reported	not reported	-1	-1	-1	not reported	not reported	not reported	no	yes	not reported	not reported	1	not reported	-1	-1	-1	not reported	no	-1	-1
TCGA-78-7155	lung adenocarcinoma- not otherwise specified (nos)	24863	-1	-1	1171	dead	stage ib	male	white	not reported	1937	not reported	-1	24863	not reported	not reported	not reported	m0	n0	t2	not reported	not reported	no	5	68	not reported	not reported	not reported	not reported	not reported	253	253	2	not reported	chemotherapy	not reported	not reported	no	not reported	not reported	4	not reported	1957	48	2005	not reported	no	2.63014	48
TCGA-05-4397	lung adenocarcinoma mixed subtype	23833	-1	-1	731	dead	stage iib	male	not reported	not reported	1941	not reported	-1	23833	not reported	not reported	not reported	m0	n1	t2	not reported	not reported	not reported	-1	65	not reported	not reported	not reported	not reported	not reported	-1	-1	-1	not reported	not reported	not reported	not reported	not reported	not reported	not reported	2	not reported	-1	45	-1	not reported	no	2.46575	-1
TCGA-91-6849	lung adenocarcinoma- not otherwise specified (nos)	27676	35	35	-1	alive	stage iiia	female	black or african american	not hispanic or latino	1934	not reported	-1	27676	not reported	not reported	not reported	mx	n2	t2	not reported	not reported	not reported	-1	75	not reported	not reported	not reported	not reported	not reported	-1	-1	-1	not reported	not reported	not reported	not reported	yes	not reported	not reported	3	not reported	1946	30	1976	not reported	no	1.64384	30
TCGA-50-5935	lung adenocarcinoma- not otherwise specified (nos)	31610	653	653	653	dead	stage ia	female	white	not hispanic or latino	1920	not reported	-1	31610	not reported	not reported	not reported	m0	n0	t1	not reported	not reported	not reported	-1	86	not reported	not reported	not reported	not reported	not reported	-1	-1	-1	not reported	not reported	not reported	yes	yes	not reported	other	-1	not reported	-1	-1	-1	not reported	no	-1	-1
TCGA-97-A4M0	lung adenocarcinoma mixed subtype	22206	652	216	-1	alive	stage ib	female	white	not hispanic or latino	1952	no	-1	22206	not reported	not reported	not reported	m0	n0	t2a	not reported	not reported	no	-1	60	not reported	not reported	not reported	not reported	not reported	-1	-1	-1	not reported	not reported	g12c	yes	no	not reported	not reported	4	complete remission/response	1970	34	2004	no	no	1.86301	34
TCGA-99-AA5R	lung adenocarcinoma- not otherwise specified (nos)	25778	658	189	-1	alive	stage ia	female	black or african american	not hispanic or latino	1943	no	-1	25778	not reported	not reported	not reported	m0	n0	t1a	not reported	not reported	yes	-1	70	ihc	not reported	not reported	not reported	not reported	-1	-1	-1	not reported	not reported	g12c	yes	yes	not reported	not reported	2	complete remission/response	1967	46	-1	no	no	2.52055	-1
TCGA-50-5939	lung adenocarcinoma mixed subtype	31236	-1	-1	460	dead	stage ib	male	white	not hispanic or latino	1923	not reported	-1	31236	not reported	not reported	not reported	m0	n0	t2	not reported	not reported	not reported	-1	85	not reported	not reported	not reported	not reported	not reported	-1	-1	-1	not reported	not reported	not reported	not reported	not reported	not reported	not reported	3	not reported	-1	15	1968	not reported	no	0.821918	-1
TCGA-05-5429	lung adenocarcinoma- not otherwise specified (nos)	22066	30	30	275	dead	stage iiia	male	not reported	not reported	1950	not reported	-1	22066	not reported	not reported	not reported	m0	n2	t3	not reported	not reported	not reported	-1	60	not reported	not reported	not reported	not reported	not reported	-1	-1	-1	not reported	not reported	not reported	not reported	not reported	not reported	not reported	1	not reported	-1	-1	-1	not reported	no	-1	-1
TCGA-75-6206	lung adenocarcinoma- not otherwise specified (nos)	-1	2590	-1	-1	alive	stage ib	male	not reported	not reported	-1	not reported	-1	-1	not reported	not reported	not reported	m0	n0	t2	not reported	not reported	not reported	-1	-1	not reported	not reported	not reported	not reported	not reported	-1	-1	-1	not reported	not reported	not reported	not reported	not reported	not reported	not reported	3	not reported	-1	20	1962	not reported	no	1.09589	-1
TCGA-55-6980	lung bronchioloalveolar carcinoma nonmucinous	-1	2109	67	-1	alive	stage ia	male	white	not reported	1950	not reported	-1	-1	not reported	not reported	not reported	m0	n0	t1	not reported	not reported	no	-1	56	not reported	not reported	not reported	not reported	not reported	-1	-1	-1	not reported	not reported	not reported	not reported	no	not reported	not reported	1	not reported	-1	-1	-1	not reported	no	-1	-1
TCGA-91-8496	lung bronchioloalveolar carcinoma nonmucinous	23358	505	197	-1	alive	stage ib	female	white	not hispanic or latino	1948	no	-1	23358	not reported	not reported	not reported	mx	nx	t2a	not reported	not reported	no	-1	63	not reported	not reported	not reported	not reported	not reported	-1	-1	-1	not reported	not reported	not reported	not reported	no	not reported	not reported	1	not reported	-1	-1	-1	no	no	-1	-1
TCGA-49-6742	mucinous (colloid) carcinoma	25839	445	-1	488	dead	stage iia	male	white	not hispanic or latino	1940	not reported	-1	25839	not reported	not reported	not reported	m0	n1	t2a	not reported	not reported	not reported	26	70	not reported	not reported	not reported	not reported	not reported	335	396	1	not reported	immunotherapy	not reported	no	not reported	not reported	not reported	3	not reported	-1	10	-1	not reported	no	0.547945	-1
TCGA-38-4626	lung adenocarcinoma- not otherwise specified (nos)	20903	3674	2595	-1	alive	not reported	female	white	not hispanic or latino	1946	not reported	-1	20903	not reported	not reported	not reported	m0	n0	t2b	not reported	not reported	not reported	-1	57	not reported	not reported	not reported	not reported	not reported	-1	-1	-1	not reported	not reported	not reported	not reported	not reported	not reported	not reported	2	not reported	1962	40	-1	not reported	no	2.19178	-1
TCGA-MN-A4N5	lung adenocarcinoma- not otherwise specified (nos)	23257	84	84	-1	alive	stage ia	male	white	not hispanic or latino	1948	not reported	-1	23257	not reported	not reported	not reported	m0	n0	t1a	not reported	not reported	yes	-1	63	ihc	not reported	not reported	not reported	not reported	-1	-1	-1	not reported	not reported	not reported	not reported	yes	not reported	not reported	4	complete remission/response	1971	-1	2011	no	no	-1	40
TCGA-50-5072	lung adenocarcinoma- not otherwise specified (nos)	27036	246	246	250	dead	stage iiia	male	white	not hispanic or latino	1935	not reported	-1	27036	not reported	not reported	not reported	m0	n2	t2	not reported	not reported	yes	16	74	not reported	not reported	not reported	not reported	clinical progressive disease	121	182	-1	not reported	chemotherapy	not reported	not reported	yes	not reported	not reported	3	not reported	-1	15	1974	not reported	yes	0.821918	-1
TCGA-75-6212	lung micropapillary adenocarcinoma	-1	-1	-1	1516	dead	stage iib	female	not reported	not reported	-1	not reported	-1	-1	not reported	not reported	not reported	m0	n1	t2	not reported	not reported	not reported	21	-1	not reported	not reported	not reported	not reported	not reported	-1	-1	1	not reported	chemotherapy	not reported	not reported	not reported	not reported	not reported	1	not reported	-1	-1	-1	not reported	no	-1	-1
TCGA-55-7574	lung adenocarcinoma- not otherwise specified (nos)	23703	95	95	995	dead	stage ib	female	white	not hispanic or latino	1947	not reported	-1	23703	not reported	not reported	not reported	m0	n0	t2a	not reported	not reported	not reported	28	64	not reported	not reported	not reported	not reported	partial response	478	631	-1	not reported	chemotherapy	not reported	not reported	not reported	not reported	not reported	4	not reported	1971	2	2011	not reported	no	0.109589	40
TCGA-78-7535	lung adenocarcinoma- not otherwise specified (nos)	16571	-1	-1	949	dead	stage ib	male	white	not reported	1955	not reported	-1	16571	not reported	not reported	not reported	m0	n0	t2	not reported	not reported	no	19	45	not reported	not reported	not reported	not reported	not reported	60	130	4	not reported	chemotherapy	not reported	not reported	no	not reported	not reported	2	not reported	1972	35	-1	not reported	no	1.91781	-1
TCGA-69-7979	lung acinar adenocarcinoma	26180	408	89	-1	alive	stage ib	female	white	not hispanic or latino	1940	not reported	-1	26180	not reported	not reported	not reported	mx	n0	t2a	not reported	not reported	no	-1	71	not reported	not reported	not reported	not reported	not reported	-1	-1	-1	not reported	not reported	not reported	not reported	no	not reported	not reported	2	not reported	1955	28	-1	not reported	no	1.53425	-1
TCGA-55-7914	lung adenocarcinoma- not otherwise specified (nos)	26105	3	3	187	dead	stage iia	female	white	not hispanic or latino	1940	not reported	-1	26105	not reported	not reported	not reported	mx	n1	t1b	not reported	not reported	yes	30	71	fish	not reported	not reported	not reported	clinical progressive disease	27	132	-1	not reported	chemotherapy	g12c	yes	yes	not reported	not reported	2	not reported	1990	5	-1	not reported	no	0.273973	-1
TCGA-05-5425	lung adenocarcinoma mixed subtype	25020	882	90	-1	alive	stage iib	male	not reported	not reported	1941	not reported	-1	25020	not reported	not reported	not reported	m0	n1	t2b	not reported	not reported	not reported	5	68	not reported	not reported	not reported	not reported	not reported	792	-1	-1	not reported	immunotherapy	not reported	not reported	not reported	not reported	not reported	3	not reported	1965	40	1985	not reported	no	2.19178	20
TCGA-80-5607	lung adenocarcinoma- not otherwise specified (nos)	-1	-1	-1	-1	alive	stage iib	female	not reported	not reported	-1	not reported	-1	-1	not reported	not reported	not reported	m0	n1	t2	not reported	not reported	not reported	-1	-1	not reported	not reported	not reported	not reported	not reported	-1	-1	-1	not reported	not reported	not reported	not reported	not reported	not reported	not reported	3	not reported	1965	15	1985	not reported	no	0.821918	20
TCGA-NJ-A55A	lung adenocarcinoma- not otherwise specified (nos)	28022	15	3	-1	alive	stage ib	female	white	not hispanic or latino	1933	no	-1	28022	not reported	not reported	not reported	m0	n0	t2	not reported	not reported	no	-1	76	not reported	not reported	not reported	not reported	not reported	-1	-1	-1	not reported	not reported	not reported	not reported	no	not reported	not reported	3	stable disease	-1	25	1983	no	no	1.36986	-1
TCGA-93-A4JP	lung papillary adenocarcinoma	23620	578	269	-1	alive	stage iv	male	asian	not hispanic or latino	1948	no	-1	23620	not reported	not reported	not reported	m1b	nx	tx	not reported	not reported	no	-1	64	not reported	not reported	not reported	not reported	not reported	-1	-1	-1	not reported	not reported	not reported	not reported	yes	not reported	l861q	1	partial remission/response	-1	-1	-1	no	no	-1	-1
TCGA-05-4418	lung adenocarcinoma mixed subtype	25417	-1	-1	274	dead	stage iiia	male	not reported	not reported	1939	not reported	-1	25417	not reported	not reported	not reported	m0	n2	t3	not reported	not reported	not reported	-1	69	not reported	not reported	not reported	not reported	not reported	-1	-1	-1	not reported	not reported	not reported	not reported	not reported	not reported	not reported	2	not reported	-1	25	-1	not reported	no	1.36986	-1
TCGA-91-6848	lung adenocarcinoma- not otherwise specified (nos)	21829	224	127	-1	alive	stage iiia	male	white	not hispanic or latino	1950	not reported	-1	21829	not reported	not reported	not reported	mx	n2	t2	not reported	not reported	not reported	28	59	not reported	not reported	not reported	not reported	complete response	91	154	-1	not reported	chemotherapy	not reported	no	not reported	not reported	not reported	4	not reported	-1	-1	2007	not reported	no	-1	-1
TCGA-49-4490	lung adenocarcinoma- not otherwise specified (nos)	16634	-1	-1	385	dead	stage iiia	female	white	not hispanic or latino	1948	not reported	-1	16634	not reported	not reported	not reported	m0	n2	t3	not reported	not reported	not reported	-1	45	not reported	not reported	not reported	not reported	not reported	-1	-1	-1	not reported	not reported	not reported	not reported	not reported	not reported	not reported	3	not reported	-1	5	-1	not reported	no	0.273973	-1
TCGA-44-4112	lung adenocarcinoma- not otherwise specified (nos)	22106	722	141	808	dead	stage ib	female	white	not hispanic or latino	1950	not reported	-1	22106	not reported	not reported	not reported	m0	n0	t2a	not reported	not reported	not reported	11	60	not reported	not reported	not reported	not reported	not reported	78	142	4	not reported	chemotherapy	not reported	not reported	not reported	not reported	not reported	3	not reported	1972	30	1992	not reported	no	1.64384	20
TCGA-55-8620	lung adenocarcinoma- not otherwise specified (nos)	22091	66	66	375	dead	stage iv	male	white	not hispanic or latino	1952	no	-1	22091	not reported	not reported	not reported	m1b	n1	t1a	not reported	not reported	no	-1	60	not reported	not reported	not reported	not reported	not reported	-1	-1	-1	not reported	not reported	not reported	not reported	no	not reported	not reported	4	progressive disease	1965	154	2012	yes	no	8.43836	47
TCGA-69-7764	lung adenocarcinoma mixed subtype	27693	414	414	-1	alive	stage ia	male	white	not hispanic or latino	1935	not reported	-1	27693	not reported	not reported	not reported	m0	n0	t1b	not reported	not reported	no	-1	75	not reported	not reported	not reported	not reported	not reported	-1	-1	-1	not reported	not reported	not reported	not reported	yes	not reported	not reported	3	not reported	1977	30	1991	not reported	no	1.64384	14
TCGA-50-5942	lung adenocarcinoma- not otherwise specified (nos)	24781	1847	136	-1	alive	stage ia	female	white	not hispanic or latino	1942	not reported	-1	24781	not reported	not reported	not reported	m0	n0	t1	not reported	not reported	not reported	-1	67	not reported	not reported	not reported	not reported	not reported	-1	-1	-1	not reported	not reported	not reported	not reported	not reported	not reported	not reported	4	not reported	-1	30	2009	not reported	no	1.64384	-1
TCGA-73-7498	lung bronchioloalveolar carcinoma nonmucinous	21527	1189	621	-1	alive	stage ia	female	white	not hispanic or latino	1952	no	-1	21527	not reported	not reported	not reported	m0	n0	t1b	not reported	not reported	no	20	58	not reported	not reported	not reported	not reported	complete response	47	131	-1	not reported	chemotherapy	not reported	not reported	no	not reported	not reported	4	complete remission/response	1969	28	1997	no	no	1.53425	28
TCGA-62-8399	lung papillary adenocarcinoma	22952	2696	2093	-1	alive	stage iiia	male	white	not hispanic or latino	1944	no	-1	22952	not reported	not reported	not reported	m0	n2	t2	not reported	not reported	no	-1	62	not reported	not reported	not reported	not reported	not reported	-1	-1	-1	not reported	not reported	not reported	not reported	no	not reported	not reported	4	complete remission/response	-1	70	-1	no	no	3.83562	-1
TCGA-44-6778	lung adenocarcinoma- not otherwise specified (nos)	21725	1864	1110	-1	alive	stage ia	male	black or african american	not reported	1948	not reported	-1	21725	not reported	not reported	not reported	mx	n0	t1	not reported	not reported	not reported	-1	59	not reported	not reported	not reported	not reported	not reported	-1	-1	-1	not reported	not reported	not reported	not reported	not reported	not reported	not reported	4	not reported	1974	15	2004	not reported	no	0.821918	30
TCGA-38-4629	lung adenocarcinoma- not otherwise specified (nos)	25104	-1	-1	864	dead	stage iib	male	white	not hispanic or latino	1935	not reported	-1	25104	not reported	not reported	not reported	m0	n0	t3	not reported	not reported	no	-1	68	not reported	not reported	not reported	not reported	not reported	-1	-1	-1	not reported	not reported	not reported	not reported	no	not reported	not reported	4	not reported	-1	100	2003	not reported	no	5.47945	-1
TCGA-55-7913	lung adenocarcinoma- not otherwise specified (nos)	22326	62	62	561	dead	stage ia	female	black or african american	not hispanic or latino	1950	no	-1	22326	not reported	not reported	not reported	mx	n0	t1b	not reported	not reported	yes	-1	61	fish	not reported	not reported	not reported	not reported	-1	-1	-1	not reported	not reported	not reported	no	yes	not reported	not reported	2	not reported	1971	40	-1	not reported	no	2.19178	-1
TCGA-44-2666	lung adenocarcinoma- not otherwise specified (nos)	15970	97	97	97	dead	stage ib	male	white	hispanic or latino	1966	not reported	-1	15970	not reported	not reported	not reported	m0	n0	t2	not reported	not reported	not reported	-1	43	not reported	not reported	not reported	not reported	not reported	-1	-1	-1	not reported	not reported	not reported	not reported	not reported	not reported	not reported	2	not reported	1979	30	-1	not reported	no	1.64384	-1
TCGA-55-8206	lung adenocarcinoma- not otherwise specified (nos)	20690	888	46	-1	alive	stage ia	male	white	not hispanic or latino	1956	no	-1	20690	not reported	not reported	not reported	m0	n0	t1b	not reported	not reported	not reported	-1	56	not reported	not reported	not reported	not reported	not reported	-1	-1	-1	not reported	not reported	not reported	not reported	not reported	not reported	not reported	1	complete remission/response	-1	-1	-1	no	no	-1	-1
TCGA-75-6205	lung adenocarcinoma- not otherwise specified (nos)	-1	-1	-1	-1	dead	stage ib	female	not reported	not reported	-1	not reported	-1	-1	not reported	not reported	not reported	m0	n0	t2a	not reported	not reported	not reported	-1	-1	not reported	not reported	not reported	not reported	not reported	-1	-1	-1	not reported	not reported	not reported	not reported	not reported	not reported	not reported	1	not reported	-1	-1	-1	not reported	no	-1	-1
TCGA-MP-A4T4	lung adenocarcinoma- not otherwise specified (nos)	25052	-1	-1	2617	dead	stage iib	female	white	not reported	1936	not reported	-1	25052	not reported	not reported	not reported	m0	n1	t2	not reported	not reported	no	-1	68	not reported	not reported	not reported	not reported	not reported	-1	-1	-1	not reported	not reported	not reported	not reported	no	not reported	not reported	2	complete remission/response	1954	50	-1	no	no	2.73973	-1
TCGA-55-8091	lung adenocarcinoma- not otherwise specified (nos)	27385	600	43	-1	alive	stage ib	male	white	not hispanic or latino	1937	no	-1	27385	not reported	not reported	not reported	mx	n0	t2	not reported	not reported	no	-1	74	not reported	not reported	not reported	not reported	not reported	-1	-1	-1	not reported	not reported	not reported	not reported	no	not reported	not reported	3	complete remission/response	-1	-1	1985	not reported	no	-1	-1
TCGA-55-6642	lung adenocarcinoma- not otherwise specified (nos)	23107	2449	993	-1	alive	stage ib	male	white	not reported	1943	not reported	-1	23107	not reported	not reported	not reported	mx	n0	t2	not reported	not reported	not reported	-1	63	not reported	not reported	not reported	not reported	not reported	-1	-1	-1	not reported	not reported	not reported	not reported	not reported	not reported	not reported	2	not reported	1961	-1	-1	not reported	no	-1	-1
TCGA-91-6828	lung adenocarcinoma- not otherwise specified (nos)	25870	323	38	-1	alive	stage ia	male	white	not hispanic or latino	1941	not reported	-1	25870	not reported	not reported	not reported	m0	n0	t1a	not reported	not reported	not reported	-1	70	not reported	not reported	not reported	not reported	not reported	-1	-1	-1	not reported	not reported	not reported	not reported	not reported	not reported	not reported	3	not reported	-1	-1	1993	not reported	no	-1	-1
TCGA-44-6777	lung adenocarcinoma- not otherwise specified (nos)	31234	-1	-1	987	dead	stage ib	female	white	not reported	1921	not reported	-1	31234	not reported	not reported	not reported	mx	nx	t2	not reported	not reported	not reported	-1	85	not reported	not reported	not reported	not reported	not reported	-1	-1	-1	not reported	not reported	not reported	not reported	not reported	not reported	not reported	4	not reported	1942	64	2006	not reported	no	3.50685	64
TCGA-95-8039	lung acinar adenocarcinoma	26317	830	27	-1	alive	stage ia	male	white	not hispanic or latino	1940	no	-1	26317	not reported	not reported	not reported	mx	n0	t1	not reported	not reported	not reported	-1	72	not reported	not reported	not reported	not reported	not reported	-1	-1	-1	not reported	not reported	not reported	not reported	not reported	not reported	not reported	1	complete remission/response	-1	-1	-1	no	no	-1	-1
TCGA-J2-8192	lung adenocarcinoma- not otherwise specified (nos)	23892	739	154	-1	alive	stage iia	female	white	not hispanic or latino	1946	no	-1	23892	not reported	not reported	not reported	mx	n1	t2a	not reported	not reported	no	16	65	not reported	not reported	not reported	not reported	not reported	641	-1	-1	not reported	chemotherapy	not reported	no	yes	not reported	exon 19 deletion	1	not reported	-1	-1	-1	no	no	-1	-1
TCGA-05-4250	lung adenocarcinoma- not otherwise specified (nos)	29068	-1	-1	121	dead	stage iiia	female	not reported	not reported	1928	not reported	-1	29068	not reported	not reported	not reported	m0	n1	t3	not reported	not reported	not reported	-1	79	not reported	not reported	not reported	not reported	not reported	-1	-1	-1	not reported	not reported	not reported	not reported	not reported	not reported	not reported	4	not reported	-1	47	-1	not reported	no	2.57534	-1
TCGA-50-5936	mucinous (colloid) carcinoma	21238	-1	-1	257	dead	stage iiia	male	white	not hispanic or latino	1949	not reported	-1	21238	not reported	not reported	not reported	m0	n2	t2	not reported	not reported	not reported	-1	58	not reported	not reported	not reported	not reported	not reported	-1	-1	-1	not reported	not reported	g12c	yes	yes	not reported	not reported	-1	not reported	-1	-1	-1	not reported	no	-1	-1
TCGA-55-8513	mucinous (colloid) carcinoma	28284	791	146	-1	alive	stage iib	female	white	not hispanic or latino	1935	no	-1	28284	not reported	not reported	not reported	mx	n0	t3	not reported	not reported	yes	28	77	not reported	not reported	not reported	not reported	not reported	561	-1	-1	not reported	chemotherapy	not reported	not reported	yes	not reported	not reported	1	complete remission/response	-1	-1	-1	no	no	-1	-1
TCGA-80-5611	lung solid pattern predominant adenocarcinoma	-1	2595	-1	-1	alive	stage ib	male	not reported	not reported	-1	not reported	-1	-1	not reported	not reported	not reported	m0	n0	t2	not reported	not reported	not reported	-1	-1	not reported	not reported	not reported	not reported	not reported	-1	-1	-1	not reported	not reported	not reported	not reported	not reported	not reported	not reported	4	not reported	-1	60	2008	not reported	no	3.28767	-1
TCGA-99-8025	lung adenocarcinoma- not otherwise specified (nos)	26634	1060	427	-1	alive	stage iiia	female	black or african american	not hispanic or latino	1938	no	-1	26634	not reported	not reported	not reported	m0	n2	t3	not reported	not reported	yes	-1	72	not reported	not reported	not reported	not reported	not reported	-1	-1	-1	not reported	not reported	not reported	no	yes	not reported	not reported	4	not reported	1958	20	1998	no	no	1.09589	40
TCGA-86-8359	lung adenocarcinoma- not otherwise specified (nos)	19088	26	26	444	dead	stage iiia	male	white	not hispanic or latino	1960	not reported	-1	19088	not reported	not reported	not reported	m0	n2	t3	not reported	not reported	not reported	-1	52	not reported	not reported	not reported	not reported	not reported	-1	-1	-1	not reported	not reported	not reported	not reported	not reported	not reported	not reported	2	not reported	1982	36	-1	not reported	no	1.9726	-1
TCGA-38-4631	lung adenocarcinoma- not otherwise specified (nos)	26538	-1	-1	354	dead	stage ib	female	white	not hispanic or latino	1925	not reported	-1	26538	not reported	not reported	not reported	m0	n0	t2	not reported	not reported	no	-1	72	not reported	not reported	not reported	not reported	not reported	-1	-1	-1	not reported	not reported	not reported	not reported	no	not reported	not reported	4	not reported	-1	40	-1	not reported	no	2.19178	-1
TCGA-97-8174	lung papillary adenocarcinoma	24725	-1	-1	164	dead	stage iia	male	white	not hispanic or latino	1944	no	-1	24725	not reported	not reported	not reported	m0	n0	t2b	not reported	not reported	yes	15	67	fish	not reported	not reported	not reported	not reported	53	102	-1	not reported	chemotherapy	not reported	no	yes	not reported	not reported	3	not reported	1965	40	1985	no	no	2.19178	20
TCGA-05-4426	lung adenocarcinoma mixed subtype	26084	791	791	-1	alive	stage ib	male	not reported	not reported	1937	not reported	-1	26084	not reported	not reported	not reported	m0	n0	t2	not reported	not reported	not reported	-1	71	not reported	not reported	not reported	not reported	not reported	-1	-1	-1	not reported	not reported	not reported	not reported	not reported	not reported	not reported	3	not reported	-1	20	-1	not reported	no	1.09589	-1
TCGA-55-7726	lung adenocarcinoma- not otherwise specified (nos)	26451	652	39	-1	alive	stage ia	female	white	not hispanic or latino	1939	not reported	-1	26451	not reported	not reported	not reported	mx	n0	t1b	not reported	not reported	not reported	-1	72	not reported	not reported	not reported	not reported	not reported	-1	-1	-1	not reported	not reported	not reported	not reported	not reported	not reported	not reported	3	not reported	1955	30	1979	not reported	no	1.64384	24
TCGA-44-5644	lung adenocarcinoma- not otherwise specified (nos)	18644	863	498	-1	alive	stage ib	female	white	not hispanic or latino	1959	not reported	-1	18644	not reported	not reported	not reported	not reported	n0	t2a	not reported	not reported	not reported	-1	51	not reported	not reported	not reported	not reported	not reported	-1	-1	-1	not reported	not reported	not reported	not reported	not reported	not reported	not reported	2	not reported	1975	17	-1	not reported	no	0.958904	-1
TCGA-55-6984	lung adenocarcinoma- not otherwise specified (nos)	-1	-1	-1	760	dead	stage iib	female	white	not hispanic or latino	1935	not reported	-1	-1	not reported	not reported	not reported	m0	n1	t2	not reported	not reported	no	17	71	not reported	not reported	not reported	not reported	clinical progressive disease	724	747	-1	not reported	chemotherapy	not reported	not reported	no	not reported	not reported	-1	not reported	-1	-1	-1	not reported	no	-1	-1
TCGA-55-A4DG	lung adenocarcinoma- not otherwise specified (nos)	26044	608	162	-1	alive	stage ia	male	white	not hispanic or latino	1941	no	-1	26044	not reported	not reported	not reported	mx	n0	t1b	not reported	not reported	not reported	-1	71	not reported	not reported	not reported	not reported	not reported	-1	-1	-1	not reported	not reported	not reported	not reported	not reported	not reported	not reported	4	complete remission/response	-1	100	2012	no	no	5.47945	-1
TCGA-55-7724	lung adenocarcinoma- not otherwise specified (nos)	27891	705	0	-1	alive	stage ib	female	white	not hispanic or latino	1935	not reported	-1	27891	not reported	not reported	not reported	mx	n0	t2a	not reported	not reported	not reported	-1	76	not reported	not reported	not reported	not reported	not reported	-1	-1	-1	not reported	not reported	not reported	not reported	not reported	not reported	not reported	4	not reported	1958	50	2008	not reported	no	2.73973	50
TCGA-05-4415	lung adenocarcinoma mixed subtype	20880	-1	-1	91	dead	stage iiib	male	not reported	not reported	1951	not reported	-1	20880	not reported	not reported	not reported	m0	n2	t4	not reported	not reported	not reported	-1	57	not reported	not reported	not reported	not reported	not reported	-1	-1	-1	not reported	not reported	not reported	not reported	not reported	not reported	not reported	4	not reported	1997	29	2007	not reported	no	1.58904	10
TCGA-NJ-A4YI	lung papillary adenocarcinoma	31867	-1	-1	4	dead	stage iiia	female	white	not reported	1922	no	-1	31867	not reported	not reported	not reported	m0	n2	t2	not reported	not reported	not reported	-1	87	not reported	not reported	not reported	not reported	not reported	-1	-1	-1	not reported	not reported	not reported	not reported	not reported	not reported	not reported	3	not reported	1936	3	1976	no	no	0.164384	40
TCGA-49-AAR4	lung adenocarcinoma- not otherwise specified (nos)	18939	-1	-1	879	dead	stage iiia	male	black or african american	not hispanic or latino	1955	no	-1	18939	not reported	not reported	not reported	mx	n2	t2	not reported	not reported	not reported	17	51	not reported	not reported	not reported	not reported	partial response	57	61	-1	not reported	chemotherapy	not reported	not reported	not reported	not reported	not reported	2	stable disease	-1	35	-1	yes	no	1.91781	-1
TCGA-78-7542	lung adenocarcinoma- not otherwise specified (nos)	20763	-1	-1	321	dead	stage ib	male	white	not reported	1937	not reported	-1	20763	not reported	not reported	not reported	m0	n0	t2	not reported	not reported	no	-1	56	not reported	not reported	not reported	not reported	not reported	-1	-1	-1	not reported	not reported	not reported	not reported	no	not reported	not reported	2	not reported	1952	60	-1	not reported	no	3.28767	-1
TCGA-97-A4M1	lung adenocarcinoma mixed subtype	19272	601	209	-1	alive	stage ia	female	white	not hispanic or latino	1960	no	-1	19272	not reported	not reported	not reported	m0	n0	t1a	not reported	not reported	no	-1	52	not reported	not reported	not reported	not reported	not reported	-1	-1	-1	not reported	not reported	not reported	not reported	no	not reported	not reported	3	complete remission/response	1972	3	1975	no	no	0.164384	3
TCGA-44-8120	lung adenocarcinoma- not otherwise specified (nos)	21188	260	169	-1	alive	stage ib	male	black or african american	not hispanic or latino	1953	no	-1	21188	not reported	not reported	not reported	m0	n0	t2a	not reported	not reported	not reported	-1	58	not reported	not reported	not reported	not reported	not reported	-1	-1	-1	not reported	not reported	not reported	not reported	not reported	not reported	not reported	5	complete remission/response	1981	30	-1	no	no	1.64384	-1
TCGA-44-6779	lung adenocarcinoma- not otherwise specified (nos)	18469	-1	-1	500	dead	stage iib	female	white	not reported	1958	not reported	-1	18469	not reported	not reported	not reported	mx	n1	t2	not reported	not reported	not reported	12	50	not reported	not reported	not reported	not reported	not reported	257	303	3	not reported	chemotherapy	not reported	not reported	not reported	not reported	not reported	4	not reported	1978	15	2008	not reported	no	0.821918	30
TCGA-44-6147	lung adenocarcinoma- not otherwise specified (nos)	24631	845	236	-1	alive	stage ia	female	white	not hispanic or latino	1943	not reported	-1	24631	not reported	not reported	not reported	m0	nx	t1b	not reported	not reported	not reported	-1	67	not reported	not reported	not reported	not reported	not reported	-1	-1	-1	not reported	not reported	not reported	not reported	not reported	not reported	not reported	3	not reported	1976	-1	1980	not reported	no	-1	4
TCGA-44-A4SS	lung adenocarcinoma- not otherwise specified (nos)	26991	415	114	-1	alive	stage ia	male	white	not hispanic or latino	1939	no	-1	26991	not reported	not reported	not reported	m0	n0	t1b	not reported	not reported	not reported	-1	73	not reported	not reported	not reported	not reported	not reported	-1	-1	-1	not reported	not reported	not reported	not reported	not reported	not reported	not reported	4	complete remission/response	1952	90	2012	no	no	4.93151	60
TCGA-86-6851	lung adenocarcinoma mixed subtype	26808	179	0	-1	alive	stage iia	female	white	not hispanic or latino	1938	not reported	-1	26808	not reported	not reported	not reported	m0	n1	t1b	not reported	not reported	not reported	-1	73	not reported	not reported	not reported	not reported	not reported	-1	-1	-1	not reported	not reported	not reported	not reported	not reported	not reported	not reported	2	not reported	1959	52	-1	not reported	no	2.84932	-1
TCGA-49-AAR2	lung acinar adenocarcinoma	23479	2224	1945	-1	alive	stage ib	male	black or african american	not hispanic or latino	1945	no	-1	23479	not reported	not reported	not reported	mx	n0	t2	not reported	not reported	not reported	-1	64	not reported	not reported	not reported	not reported	not reported	-1	-1	-1	not reported	not reported	not reported	not reported	not reported	not reported	not reported	4	complete remission/response	-1	-1	2006	no	no	-1	-1
TCGA-05-4403	lung adenocarcinoma mixed subtype	27881	578	578	-1	alive	stage ib	male	not reported	not reported	1930	not reported	-1	27881	not reported	not reported	not reported	m0	n0	t2	not reported	not reported	not reported	-1	76	not reported	not reported	not reported	not reported	not reported	-1	-1	-1	not reported	not reported	not reported	not reported	not reported	not reported	not reported	3	not reported	-1	-1	1975	not reported	no	-1	-1
TCGA-78-7147	lung adenocarcinoma- not otherwise specified (nos)	24809	-1	-1	586	dead	stage iib	female	white	not reported	1934	not reported	-1	24809	not reported	not reported	not reported	m0	n1	t2	not reported	not reported	no	-1	67	not reported	not reported	not reported	not reported	not reported	-1	-1	-1	not reported	not reported	not reported	not reported	no	not reported	not reported	2	not reported	1950	50	-1	not reported	no	2.73973	-1
TCGA-86-8278	lung adenocarcinoma- not otherwise specified (nos)	23117	944	23	-1	alive	stage iib	female	white	not hispanic or latino	1948	no	-1	23117	not reported	not reported	not reported	m0	n1	t2	not reported	not reported	not reported	25	63	not reported	not reported	not reported	not reported	not reported	178	-1	-1	not reported	targeted molecular therapy	not reported	not reported	not reported	not reported	not reported	1	complete remission/response	-1	-1	-1	not reported	no	-1	-1
TCGA-62-A46R	lung adenocarcinoma mixed subtype	20063	-1	-1	1725	dead	stage ib	female	white	not hispanic or latino	1952	no	-1	20063	not reported	not reported	not reported	m0	n0	t2	not reported	not reported	no	-1	54	not reported	not reported	not reported	not reported	not reported	-1	-1	-1	not reported	not reported	not reported	not reported	no	not reported	not reported	4	complete remission/response	-1	25	-1	no	no	1.36986	-1
TCGA-38-A44F	lung adenocarcinoma mixed subtype	29534	133	133	-1	alive	stage ib	male	white	not hispanic or latino	1932	no	-1	29534	not reported	not reported	not reported	m0	n0	t2a	not reported	not reported	yes	-1	80	fish	not reported	not reported	not reported	not reported	-1	-1	-1	not reported	not reported	not reported	not reported	no	not reported	not reported	3	complete remission/response	1965	12	1977	no	no	0.657534	12
TCGA-44-2668	lung adenocarcinoma- not otherwise specified (nos)	18856	246	246	761	dead	stage ib	male	white	not hispanic or latino	1958	not reported	-1	18856	not reported	not reported	not reported	m0	n0	t2	not reported	not reported	not reported	-1	51	not reported	not reported	not reported	not reported	not reported	-1	-1	-1	not reported	not reported	not reported	not reported	not reported	not reported	not reported	4	not reported	1979	60	2009	not reported	no	3.28767	30
TCGA-95-7947	lung adenocarcinoma mixed subtype	24752	477	40	-1	alive	stage ia	male	white	not hispanic or latino	1944	not reported	-1	24752	not reported	not reported	not reported	m0	n0	t1a	not reported	not reported	not reported	-1	67	not reported	not reported	not reported	not reported	not reported	-1	-1	-1	not reported	not reported	not reported	not reported	not reported	not reported	not reported	4	not reported	1956	100	2006	not reported	no	5.47945	50
TCGA-MN-A4N1	lung adenocarcinoma- not otherwise specified (nos)	21939	827	285	-1	alive	stage iia	male	black or african american	not hispanic or latino	1951	no	-1	21939	not reported	not reported	not reported	m0	n1	t2a	not reported	not reported	yes	-1	60	ihc	not reported	not reported	not reported	not reported	-1	-1	-1	not reported	not reported	not reported	not reported	yes	not reported	not reported	2	complete remission/response	1967	-1	-1	no	no	-1	-1
TCGA-86-8281	lung adenocarcinoma- not otherwise specified (nos)	27409	0	0	-1	alive	stage ia	male	white	not hispanic or latino	1936	no	-1	27409	not reported	not reported	not reported	m0	nx	t1	not reported	not reported	not reported	-1	75	not reported	not reported	not reported	not reported	not reported	-1	-1	-1	not reported	not reported	not reported	not reported	not reported	not reported	not reported	3	complete remission/response	1955	30	1985	not reported	no	1.64384	30
TCGA-64-1679	lung adenocarcinoma- not otherwise specified (nos)	21310	2488	1686	-1	alive	stage iiia	female	white	not hispanic or latino	1949	not reported	-1	21310	not reported	not reported	not reported	m0	n2	t1	not reported	not reported	not reported	21	58	not reported	not reported	not reported	not reported	not reported	55	139	4	not reported	chemotherapy	not reported	not reported	not reported	not reported	not reported	2	not reported	-1	40	-1	not reported	no	2.19178	-1
TCGA-78-7146	lung adenocarcinoma mixed subtype	26272	-1	-1	173	dead	stage iiia	female	white	not reported	1928	not reported	-1	26272	not reported	not reported	not reported	m0	n2	t2	not reported	not reported	no	-1	71	not reported	not reported	not reported	not reported	not reported	-1	-1	-1	not reported	not reported	not reported	not reported	no	not reported	not reported	4	not reported	1988	6	1998	not reported	no	0.328767	10
TCGA-55-1596	lung adenocarcinoma- not otherwise specified (nos)	20381	2065	1375	-1	alive	stage iib	male	asian	not hispanic or latino	1949	not reported	-1	20381	not reported	not reported	not reported	m0	n1	t2	not reported	not reported	not reported	22	55	not reported	not reported	not reported	not reported	complete response	34	-1	-1	not reported	chemotherapy	not reported	not reported	not reported	not reported	not reported	2	not reported	1979	50	-1	not reported	no	2.73973	-1
TCGA-78-7156	lung adenocarcinoma mixed subtype	22720	-1	-1	976	dead	stage iv	male	white	not reported	1944	not reported	-1	22720	not reported	not reported	not reported	m1	n1	t4	not reported	not reported	no	-1	62	not reported	not reported	not reported	not reported	not reported	-1	-1	-1	not reported	not reported	not reported	not reported	no	not reported	not reported	3	not reported	1961	84	1989	not reported	no	4.60274	28
TCGA-55-8614	lung adenocarcinoma- not otherwise specified (nos)	27924	536	41	-1	alive	stage ib	male	white	not hispanic or latino	1935	no	-1	27924	not reported	not reported	not reported	mx	n0	t2a	not reported	not reported	not reported	-1	76	not reported	not reported	not reported	not reported	not reported	-1	-1	-1	not reported	not reported	not reported	not reported	not reported	not reported	not reported	3	complete remission/response	-1	40	1995	no	no	2.19178	-1
TCGA-55-1595	lung clear cell adenocarcinoma	-1	1479	1479	-1	alive	stage ia	female	asian	not hispanic or latino	1930	not reported	-1	-1	not reported	not reported	not reported	m0	n0	t1	not reported	not reported	not reported	-1	74	not reported	not reported	not reported	not reported	not reported	-1	-1	-1	not reported	not reported	not reported	not reported	not reported	not reported	not reported	4	not reported	1964	-1	1993	not reported	no	-1	29
TCGA-64-5775	lung adenocarcinoma- not otherwise specified (nos)	26058	-1	-1	62	dead	stage iiia	male	white	not hispanic or latino	1934	not reported	-1	26058	not reported	not reported	not reported	m0	n0	t4	not reported	not reported	not reported	3	71	not reported	not reported	not reported	not reported	not reported	0	34	5	not reported	chemotherapy	not reported	not reported	not reported	not reported	not reported	2	not reported	1950	110	-1	not reported	yes	6.0274	-1
TCGA-75-7027	lung adenocarcinoma- not otherwise specified (nos)	-1	3059	-1	-1	alive	stage ib	male	not reported	not reported	-1	not reported	-1	-1	not reported	not reported	not reported	m0	n0	t2	not reported	not reported	not reported	-1	-1	not reported	not reported	not reported	not reported	not reported	-1	-1	-1	not reported	not reported	not reported	not reported	not reported	not reported	not reported	2	not reported	1956	50	-1	not reported	no	2.73973	-1
TCGA-44-6144	lung adenocarcinoma- not otherwise specified (nos)	21283	723	9	-1	alive	stage ia	male	white	not hispanic or latino	1953	not reported	-1	21283	not reported	not reported	not reported	m0	n0	t1a	not reported	not reported	not reported	-1	58	not reported	not reported	not reported	not reported	not reported	-1	-1	-1	not reported	not reported	not reported	not reported	not reported	not reported	not reported	2	not reported	1968	67	-1	not reported	no	3.69863	-1
TCGA-86-7955	lung adenocarcinoma- not otherwise specified (nos)	22772	1072	14	-1	alive	stage ib	male	white	not hispanic or latino	1949	not reported	-1	22772	not reported	not reported	not reported	m0	n0	t2a	not reported	not reported	not reported	12	62	not reported	not reported	not reported	not reported	complete response	823	922	-1	not reported	chemotherapy	not reported	not reported	no	not reported	not reported	1	not reported	-1	-1	-1	not reported	no	-1	-1
TCGA-NJ-A7XG	lung adenocarcinoma- not otherwise specified (nos)	18127	617	295	-1	alive	stage iiia	male	black or african american	not hispanic or latino	1964	no	-1	18127	not reported	not reported	not reported	m0	n1	t4	not reported	not reported	not reported	25	49	not reported	not reported	not reported	not reported	stable disease	30	128	-1	not reported	chemotherapy	not reported	no	yes	not reported	other	3	stable disease	-1	-1	-1	no	no	-1	-1
TCGA-L4-A4E6	lung adenocarcinoma- not otherwise specified (nos)	24631	435	76	-1	alive	stage ia	male	white	not hispanic or latino	1945	no	-1	24631	not reported	not reported	not reported	m0	n0	t1	not reported	not reported	no	-1	67	not reported	not reported	not reported	not reported	not reported	-1	-1	-1	not reported	not reported	not reported	not reported	no	not reported	not reported	3	complete remission/response	1954	30	1984	no	no	1.64384	30
TCGA-MP-A4TJ	lung signet ring adenocarcinoma	22875	-1	-1	339	dead	stage ia	female	not reported	not reported	1944	not reported	-1	22875	not reported	not reported	not reported	m0	n0	t1	not reported	not reported	no	-1	62	not reported	not reported	not reported	not reported	not reported	-1	-1	-1	not reported	not reported	not reported	not reported	no	not reported	not reported	2	complete remission/response	-1	-1	-1	no	no	-1	-1
TCGA-J2-A4AE	lung adenocarcinoma- not otherwise specified (nos)	28163	1079	282	-1	alive	stage ia	female	white	not hispanic or latino	1935	no	-1	28163	not reported	not reported	not reported	mx	n0	t1a	not reported	not reported	no	-1	77	not reported	not reported	not reported	not reported	not reported	-1	-1	-1	not reported	not reported	not reported	not reported	no	not reported	not reported	1	not reported	-1	-1	-1	no	no	-1	-1
TCGA-53-7624	lung adenocarcinoma- not otherwise specified (nos)	14794	-1	-1	1043	dead	stage iv	female	white	hispanic or latino	1968	not reported	-1	14794	not reported	not reported	not reported	m1	n0	t2	not reported	not reported	no	31	40	not reported	not reported	not reported	not reported	clinical progressive disease	339	490	-1	not reported	chemotherapy	not reported	not reported	no	not reported	not reported	2	not reported	1986	50	-1	not reported	no	2.73973	-1
TCGA-78-8660	lung adenocarcinoma- not otherwise specified (nos)	25422	-1	-1	321	dead	stage iib	male	not reported	not reported	1936	yes	242	25422	not reported	not reported	not reported	m0	n1	t2	not reported	not reported	no	-1	69	not reported	not reported	not reported	not reported	not reported	-1	-1	-1	not reported	not reported	not reported	not reported	no	not reported	not reported	4	not reported	1954	11	2005	yes	no	0.60274	51
TCGA-49-6767	lung adenocarcinoma- not otherwise specified (nos)	17108	677	0	-1	alive	stage iib	female	white	not reported	1964	not reported	-1	17108	not reported	not reported	not reported	mx	n0	t3	not reported	not reported	not reported	-1	46	not reported	not reported	not reported	not reported	not reported	-1	-1	-1	not reported	not reported	not reported	not reported	not reported	not reported	not reported	2	not reported	-1	30	-1	not reported	no	1.64384	-1
TCGA-55-8207	lung acinar adenocarcinoma	26897	977	66	-1	alive	stage ib	male	white	not hispanic or latino	1938	no	-1	26897	not reported	not reported	not reported	mx	n0	t2a	not reported	not reported	not reported	-1	73	not reported	not reported	not reported	not reported	not reported	-1	-1	-1	not reported	not reported	not reported	not reported	not reported	not reported	not reported	3	complete remission/response	-1	-1	-1	no	no	-1	-1
TCGA-55-7284	lung bronchioloalveolar carcinoma nonmucinous	27087	121	121	243	dead	stage iib	male	white	not hispanic or latino	1937	no	-1	27087	not reported	not reported	not reported	mx	n0	t3	not reported	not reported	not reported	-1	74	not reported	not reported	not reported	not reported	not reported	-1	-1	-1	not reported	not reported	not reported	not reported	not reported	not reported	not reported	3	not reported	-1	-1	-1	not reported	no	-1	-1
TCGA-78-7160	lung adenocarcinoma mixed subtype	22385	678	678	697	dead	stage iv	male	white	not reported	1947	not reported	-1	22385	not reported	not reported	not reported	m1	n2	t4	not reported	not reported	no	-1	61	not reported	not reported	not reported	not reported	not reported	-1	-1	-1	not reported	not reported	not reported	not reported	no	not reported	not reported	4	not reported	1963	43	1998	not reported	no	2.4	35
TCGA-05-4410	lung adenocarcinoma mixed subtype	22888	0	0	-1	alive	stage ib	male	not reported	not reported	1945	not reported	-1	22888	not reported	not reported	not reported	m0	n0	t2	not reported	not reported	not reported	-1	62	not reported	not reported	not reported	not reported	not reported	-1	-1	-1	not reported	not reported	not reported	not reported	not reported	not reported	not reported	4	not reported	1958	98	2007	not reported	no	5.36986	49
TCGA-44-3398	lung adenocarcinoma- not otherwise specified (nos)	28392	1163	253	-1	alive	stage ia	female	white	not hispanic or latino	1932	not reported	-1	28392	not reported	not reported	not reported	m0	n0	t1b	not reported	not reported	not reported	-1	77	not reported	not reported	not reported	not reported	not reported	-1	-1	-1	not reported	not reported	not reported	not reported	not reported	not reported	not reported	4	not reported	1959	60	2009	not reported	no	3.28767	50
TCGA-35-4122	lung adenocarcinoma- not otherwise specified (nos)	25491	225	225	-1	alive	stage ia	male	white	not hispanic or latino	1941	not reported	-1	25491	not reported	not reported	not reported	m0	n0	t1	not reported	not reported	no	-1	69	not reported	not reported	not reported	not reported	not reported	-1	-1	-1	not reported	not reported	not reported	not reported	no	not reported	not reported	4	not reported	1965	45	2010	not reported	no	2.46575	45
TCGA-NJ-A55O	mucinous (colloid) carcinoma	20628	13	13	-1	alive	stage iia	female	white	not hispanic or latino	1955	no	-1	20628	not reported	not reported	not reported	m0	n1	t1b	not reported	not reported	no	-1	56	not reported	not reported	not reported	not reported	not reported	-1	-1	-1	not reported	not reported	not reported	not reported	no	not reported	not reported	4	stable disease	-1	30	2000	no	no	1.64384	-1
TCGA-78-7166	lung adenocarcinoma- not otherwise specified (nos)	30869	-1	-1	258	dead	stage iib	male	white	not reported	1918	not reported	-1	30869	not reported	not reported	not reported	m0	n1	t2	not reported	not reported	no	-1	84	not reported	not reported	not reported	not reported	not reported	-1	-1	-1	not reported	not reported	not reported	not reported	no	not reported	not reported	3	not reported	1934	38	1972	not reported	no	2.08219	38
TCGA-NJ-A55R	lung adenocarcinoma- not otherwise specified (nos)	24738	603	603	-1	alive	stage ia	male	white	not hispanic or latino	1944	no	-1	24738	not reported	not reported	not reported	mx	n0	t1b	not reported	not reported	no	-1	67	not reported	not reported	not reported	not reported	not reported	-1	-1	-1	not reported	not reported	not reported	not reported	no	not reported	not reported	3	stable disease	-1	5	1986	no	no	0.273973	-1
TCGA-78-7153	lung adenocarcinoma mixed subtype	23922	3635	760	-1	alive	stage ib	female	white	not reported	1938	not reported	-1	23922	not reported	not reported	not reported	m0	n0	t2	not reported	not reported	no	-1	65	not reported	not reported	not reported	not reported	not reported	-1	-1	-1	not reported	not reported	not reported	not reported	no	not reported	not reported	4	not reported	1948	20	1988	not reported	no	1.09589	40
TCGA-86-8672	lung adenocarcinoma- not otherwise specified (nos)	21682	15	15	19	dead	stage iib	male	white	not hispanic or latino	1953	not reported	-1	21682	not reported	not reported	not reported	m0	n0	t3	not reported	not reported	not reported	-1	59	not reported	not reported	not reported	not reported	not reported	-1	-1	-1	not reported	not reported	not reported	not reported	not reported	not reported	not reported	1	not reported	-1	-1	-1	not reported	no	-1	-1
TCGA-55-8087	lung adenocarcinoma- not otherwise specified (nos)	21655	462	21	-1	alive	stage ib	female	white	not hispanic or latino	1952	no	-1	21655	not reported	not reported	not reported	mx	n0	t2a	not reported	not reported	no	-1	59	not reported	not reported	not reported	not reported	not reported	-1	-1	-1	not reported	not reported	not reported	not reported	no	not reported	not reported	1	complete remission/response	-1	-1	-1	not reported	no	-1	-1
TCGA-05-4425	lung adenocarcinoma mixed subtype	25902	669	669	-1	alive	stage iv	female	not reported	not reported	1938	not reported	-1	25902	not reported	not reported	not reported	m1	n0	t2	not reported	not reported	not reported	5	70	not reported	not reported	not reported	not reported	not reported	31	153	-1	not reported	chemotherapy	not reported	not reported	not reported	not reported	not reported	3	not reported	-1	28	-1	not reported	no	1.53425	-1
TCGA-MP-A4TH	lung adenocarcinoma- not otherwise specified (nos)	25759	741	142	-1	alive	stage ia	female	white	not hispanic or latino	1942	no	-1	25759	not reported	not reported	not reported	m0	n0	t1a	not reported	not reported	no	-1	70	not reported	not reported	not reported	not reported	not reported	-1	-1	-1	not reported	not reported	not reported	not reported	no	not reported	not reported	3	complete remission/response	1962	20	1982	no	no	1.09589	20
TCGA-67-6217	lung adenocarcinoma- not otherwise specified (nos)	26920	422	422	-1	alive	stage iia	female	white	not hispanic or latino	1937	not reported	-1	26920	not reported	not reported	not reported	m0	n1	t2a	not reported	not reported	yes	-1	73	rt-pcr	not reported	not reported	not reported	not reported	-1	-1	-1	not reported	not reported	not reported	no	yes	not reported	l858r	3	not reported	-1	-1	1965	not reported	no	-1	-1
TCGA-97-8172	lung acinar adenocarcinoma	27416	545	182	-1	alive	stage ib	female	white	not hispanic or latino	1936	no	-1	27416	not reported	not reported	not reported	m0	n0	t2a	not reported	not reported	no	-1	75	not reported	not reported	not reported	not reported	not reported	-1	-1	-1	not reported	not reported	g12v	yes	yes	not reported	not reported	3	complete remission/response	1961	20	1981	no	no	1.09589	20
TCGA-97-8175	lung solid pattern predominant adenocarcinoma	20206	551	87	-1	alive	stage ib	female	white	not hispanic or latino	1956	no	-1	20206	not reported	not reported	not reported	m0	n0	t2a	not reported	not reported	yes	19	55	fish	not reported	not reported	not reported	not reported	472	-1	-1	not reported	chemotherapy	not reported	no	yes	not reported	not reported	3	complete remission/response	-1	-1	1981	no	no	-1	-1
TCGA-78-8655	lung adenocarcinoma mixed subtype	28379	2360	2360	-1	alive	stage ia	female	not reported	not reported	1926	not reported	-1	28379	not reported	not reported	not reported	m0	n0	t1	not reported	not reported	no	-1	77	not reported	not reported	not reported	not reported	not reported	-1	-1	-1	not reported	not reported	not reported	not reported	no	not reported	not reported	4	complete remission/response	1981	10	2001	no	no	0.547945	20
TCGA-91-A4BD	lung adenocarcinoma- not otherwise specified (nos)	28544	603	218	-1	alive	stage iia	male	white	not hispanic or latino	1934	no	-1	28544	not reported	not reported	not reported	mx	n1	t1b	not reported	not reported	not reported	-1	78	not reported	not reported	not reported	not reported	not reported	-1	-1	-1	not reported	not reported	not reported	not reported	no	not reported	not reported	3	complete remission/response	-1	-1	1981	no	no	-1	-1
TCGA-86-8056	lung adenocarcinoma mixed subtype	23369	139	0	-1	alive	stage iiia	female	white	not hispanic or latino	1948	no	-1	23369	not reported	not reported	not reported	m0	n0	t4	not reported	not reported	no	-1	63	not reported	not reported	not reported	not reported	not reported	-1	-1	-1	not reported	not reported	not reported	not reported	no	not reported	not reported	3	complete remission/response	1963	36	1975	not reported	no	1.9726	12
TCGA-L9-A5IP	lung adenocarcinoma- not otherwise specified (nos)	14681	-1	-1	58	dead	stage iv	female	black or african american	not hispanic or latino	1972	yes	49	14681	not reported	not reported	not reported	m1b	n2	t3	not reported	not reported	yes	-1	40	fish	not reported	not reported	not reported	not reported	-1	-1	-1	not reported	not reported	not reported	not reported	yes	not reported	not reported	4	progressive disease	-1	-1	2012	no	no	-1	-1
TCGA-44-A47F	lung adenocarcinoma- not otherwise specified (nos)	27122	337	246	-1	alive	stage iib	male	white	not hispanic or latino	1938	no	-1	27122	not reported	not reported	not reported	m0	n1	t2b	not reported	not reported	not reported	20	74	not reported	not reported	not reported	not reported	complete response	122	185	-1	not reported	chemotherapy	not reported	not reported	not reported	not reported	not reported	3	complete remission/response	1955	20	1987	no	no	1.09589	32
TCGA-50-5045	lung adenocarcinoma- not otherwise specified (nos)	20961	-1	-1	2174	dead	not reported	female	black or african american	not hispanic or latino	1947	not reported	-1	20961	not reported	not reported	not reported	m0	n1	t2	not reported	not reported	not reported	-1	57	not reported	not reported	not reported	not reported	not reported	-1	-1	-1	not reported	not reported	not reported	not reported	not reported	not reported	not reported	-1	not reported	-1	-1	-1	not reported	no	-1	-1
TCGA-L4-A4E5	lung adenocarcinoma- not otherwise specified (nos)	17680	578	213	-1	alive	stage i	female	white	not hispanic or latino	1964	no	-1	17680	not reported	not reported	not reported	m0	n0	t1	not reported	not reported	no	-1	48	not reported	not reported	not reported	not reported	not reported	-1	-1	-1	not reported	not reported	not reported	not reported	no	not reported	not reported	4	complete remission/response	1979	33	2012	no	no	1.80822	33
TCGA-55-8302	lung adenocarcinoma- not otherwise specified (nos)	20011	478	23	-1	alive	stage ib	male	white	not reported	1958	no	-1	20011	not reported	not reported	not reported	mx	n0	t2	not reported	not reported	not reported	-1	54	not reported	not reported	not reported	not reported	not reported	-1	-1	-1	not reported	not reported	not reported	not reported	not reported	not reported	not reported	2	complete remission/response	1965	59	-1	no	no	3.23288	-1
TCGA-91-6840	lung adenocarcinoma- not otherwise specified (nos)	21854	372	0	-1	alive	stage ia	female	white	not hispanic or latino	1952	not reported	-1	21854	not reported	not reported	not reported	m0	n0	t1b	not reported	not reported	not reported	-1	59	not reported	not reported	not reported	not reported	not reported	-1	-1	-1	not reported	not reported	not reported	not reported	not reported	not reported	not reported	3	not reported	1971	50	1996	not reported	no	2.73973	25
TCGA-86-8358	lung adenocarcinoma- not otherwise specified (nos)	16409	653	19	-1	alive	stage ib	male	white	not hispanic or latino	1968	no	-1	16409	not reported	not reported	not reported	m0	n0	t2a	not reported	not reported	not reported	-1	44	not reported	not reported	not reported	not reported	not reported	-1	-1	-1	not reported	not reported	not reported	not reported	not reported	not reported	not reported	2	not reported	1992	20	-1	not reported	no	1.09589	-1
[truncated: 13 more columns]

## Sheet: LUSC
patient_id	histological_type	age_at_diagnosis	diagnosis_days_to_last_follow_up	clinical_days_to_last_follow_up	days_to_death	vital_status	pathologic_stage	gender	race	ethnicity	year_of_birth	recurrent	days_to_recurrent	age_at_diagnosis_in_days	clinical_M	clinical_N	clinical_T	pathologic_M	pathologic_N	pathologic_T	days_to_psa	psa_value	eml4_alk_translocation_performed	age_at_initial_pathologic_diagnosis	kras_mutation_result	eml4_alk_translocation_method	number_pack_years_smoked	kras_mutation_found	time_os	event_os	time_rfs	event_rfs	grouped_pathologic_stage	grouped_pathologic_stage_early_late	grouped_clinical_M	grouped_clinical_T	grouped_pathologic_M	grouped_pathologic_T	grouped_pathologic_N
TCGA-70-6722	lung squamous cell carcinoma- not otherwise specified (nos)	17328	367	0	-1	alive	stage iiia	male	asian	not hispanic or latino	1963	not reported	-1	17328	not reported	not reported	not reported	m0	n1	t3	not reported	not reported	not reported	47	not reported	not reported	-1	not reported	367	0	-1	-1	iii	late	not reported	not reported	m0	t3	n1
TCGA-22-5480	lung squamous cell carcinoma- not otherwise specified (nos)	24245	2170	2170	2170	dead	stage ia	female	white	not hispanic or latino	1936	not reported	-1	24245	not reported	not reported	not reported	m0	n0	t1b	not reported	not reported	no	66	not reported	not reported	50	not reported	2170	1	-1	-1	i	early	not reported	not reported	m0	t1	n0
TCGA-85-7698	lung squamous cell carcinoma- not otherwise specified (nos)	17651	952	49	-1	alive	stage ia	male	white	not hispanic or latino	1963	not reported	-1	17651	not reported	not reported	not reported	m0	n0	t1b	not reported	not reported	not reported	48	not reported	not reported	44	not reported	952	0	-1	-1	i	early	not reported	not reported	m0	t1	n0
TCGA-18-3407	lung squamous cell carcinoma- not otherwise specified (nos)	26615	-1	-1	136	dead	stage ib	male	asian	not hispanic or latino	1931	not reported	-1	26615	not reported	not reported	not reported	m0	n0	t2	not reported	not reported	not reported	72	not reported	not reported	40	not reported	136	1	-1	-1	i	early	not reported	not reported	m0	t2	n0
TCGA-77-8131	lung squamous cell carcinoma- not otherwise specified (nos)	26611	-1	-1	383	dead	stage ib	male	not reported	not reported	1928	not reported	-1	26611	not reported	not reported	not reported	m0	nx	t2	not reported	not reported	no	72	not reported	not reported	69	not reported	383	1	-1	-1	i	early	not reported	not reported	m0	t2	nx
TCGA-22-5492	lung squamous cell carcinoma- not otherwise specified (nos)	26838	506	506	506	dead	stage iiia	female	not reported	not reported	1930	not reported	-1	26838	not reported	not reported	not reported	m0	n2	t2a	not reported	not reported	no	73	not reported	not reported	50	not reported	506	1	-1	-1	iii	late	not reported	not reported	m0	t2	n2
TCGA-43-5668	lung squamous cell carcinoma- not otherwise specified (nos)	28635	349	258	559	dead	stage iia	male	white	not hispanic or latino	1932	not reported	-1	28635	not reported	not reported	not reported	m0	n1	t1b	not reported	not reported	not reported	78	not reported	not reported	20	not reported	559	1	-1	-1	ii	early	not reported	not reported	m0	t1	n1
TCGA-56-A4BX	lung squamous cell carcinoma- not otherwise specified (nos)	25745	405	46	-1	alive	stage iia	male	white	not hispanic or latino	1942	no	-1	25745	not reported	not reported	not reported	mx	n0	t2b	not reported	not reported	no	70	not reported	not reported	83	not reported	405	0	405	0	ii	early	not reported	not reported	not reported	t2	n0
TCGA-34-5239	lung squamous cell carcinoma- not otherwise specified (nos)	27528	1834	329	-1	alive	stage iiia	male	white	not hispanic or latino	1935	not reported	-1	27528	not reported	not reported	not reported	m0	n0	t4	not reported	not reported	yes	75	not reported	not reported	-1	not reported	1834	0	-1	-1	iii	late	not reported	not reported	m0	t4	n0
TCGA-37-A5EM	lung squamous cell carcinoma- not otherwise specified (nos)	18011	867	112	-1	alive	stage ii	male	white	not hispanic or latino	1962	no	-1	18011	not reported	not reported	not reported	m0	n0	t2	not reported	not reported	not reported	49	not reported	not reported	-1	not reported	867	0	867	0	ii	early	not reported	not reported	m0	t2	n0
TCGA-43-A56V	lung squamous cell carcinoma- not otherwise specified (nos)	22475	366	154	-1	alive	stage iiia	male	black or african american	not hispanic or latino	1951	no	-1	22475	not reported	not reported	not reported	m0	n2	t2a	not reported	not reported	not reported	61	not reported	not reported	48	not reported	366	0	366	0	iii	late	not reported	not reported	m0	t2	n2
TCGA-56-6546	lung squamous cell carcinoma- not otherwise specified (nos)	24594	-1	-1	-1	dead	stage iia	male	white	not hispanic or latino	1944	not reported	-1	24594	not reported	not reported	not reported	mx	n0	t2b	not reported	not reported	not reported	67	not reported	not reported	-1	not reported	-1	-1	-1	-1	ii	early	not reported	not reported	not reported	t2	n0
TCGA-90-A59Q	lung squamous cell carcinoma- not otherwise specified (nos)	22420	269	269	322	dead	stage iia	female	white	not hispanic or latino	1951	no	-1	22420	not reported	not reported	not reported	mx	n1	t2a	not reported	not reported	not reported	61	not reported	not reported	80	not reported	322	1	322	0	ii	early	not reported	not reported	not reported	t2	n1
TCGA-18-5595	lung squamous cell carcinoma- not otherwise specified (nos)	18611	-1	-1	827	dead	stage ib	male	not reported	not reported	1958	not reported	-1	18611	not reported	not reported	not reported	m0	n0	t2	not reported	not reported	not reported	50	not reported	not reported	-1	not reported	827	1	-1	-1	i	early	not reported	not reported	m0	t2	n0
TCGA-34-5236	lung squamous cell carcinoma- not otherwise specified (nos)	21935	-1	-1	276	dead	stage iib	male	white	not hispanic or latino	1947	not reported	-1	21935	not reported	not reported	not reported	m0	n0	t3	not reported	not reported	not reported	60	not reported	not reported	-1	not reported	276	1	-1	-1	ii	early	not reported	not reported	m0	t3	n0
TCGA-33-AASJ	lung squamous cell carcinoma- not otherwise specified (nos)	22179	-1	-1	3600	dead	stage ib	male	black or african american	not hispanic or latino	1939	yes	1135	22179	not reported	not reported	not reported	mx	n0	t2	not reported	not reported	not reported	60	not reported	not reported	-1	not reported	3600	1	1135	1	i	early	not reported	not reported	not reported	t2	n0
TCGA-85-8580	lung squamous cell carcinoma- not otherwise specified (nos)	19301	1113	28	-1	alive	stage ib	female	white	not hispanic or latino	1960	not reported	-1	19301	not reported	not reported	not reported	m0	n0	t2a	not reported	not reported	no	52	not reported	not reported	38	not reported	1113	0	-1	-1	i	early	not reported	not reported	m0	t2	n0
TCGA-43-5670	lung squamous cell carcinoma- not otherwise specified (nos)	25652	849	549	-1	alive	stage iia	male	white	not hispanic or latino	1940	not reported	-1	25652	not reported	not reported	not reported	m0	n0	t2b	not reported	not reported	not reported	70	not reported	not reported	30	not reported	849	0	-1	-1	ii	early	not reported	not reported	m0	t2	n0
TCGA-85-7950	lung squamous cell carcinoma- not otherwise specified (nos)	16975	576	60	-1	alive	stage ib	male	white	not hispanic or latino	1965	not reported	-1	16975	not reported	not reported	not reported	m0	n0	t2a	not reported	not reported	not reported	46	not reported	not reported	27	not reported	576	0	-1	-1	i	early	not reported	not reported	m0	t2	n0
TCGA-NC-A5HE	lung squamous cell carcinoma- not otherwise specified (nos)	22179	2336	1722	-1	alive	stage iib	male	white	not reported	1948	no	-1	22179	not reported	not reported	not reported	m0	n1	t2	not reported	not reported	no	60	not reported	not reported	30	not reported	2336	0	2336	0	ii	early	not reported	not reported	m0	t2	n1
TCGA-98-8020	lung squamous cell carcinoma- not otherwise specified (nos)	20509	-1	-1	84	dead	stage iiia	female	black or african american	not hispanic or latino	1955	yes	11	20509	not reported	not reported	not reported	m0	n2	t2	not reported	not reported	no	56	not reported	not reported	-1	no	84	1	11	1	iii	late	not reported	not reported	m0	t2	n2
TCGA-39-5031	lung squamous cell carcinoma- not otherwise specified (nos)	28106	833	833	1841	dead	stage ia	female	not reported	not reported	1931	not reported	-1	28106	not reported	not reported	not reported	m0	n0	t1a	not reported	not reported	no	76	not reported	not reported	60	not reported	1841	1	-1	-1	i	early	not reported	not reported	m0	t1	n0
TCGA-66-2777	lung squamous cell carcinoma- not otherwise specified (nos)	26085	61	61	-1	alive	stage ib	male	not reported	not reported	1936	not reported	-1	26085	not reported	not reported	not reported	m0	n0	t2	not reported	not reported	not reported	71	not reported	not reported	12	not reported	61	0	-1	-1	i	early	not reported	not reported	m0	t2	n0
TCGA-92-8063	lung squamous cell carcinoma- not otherwise specified (nos)	19193	122	122	-1	alive	stage iiia	male	white	not hispanic or latino	1959	no	-1	19193	not reported	not reported	not reported	mx	n2	t2b	not reported	not reported	no	52	not reported	not reported	74	not reported	122	0	122	0	iii	late	not reported	not reported	not reported	t2	n2
TCGA-85-6798	lung squamous cell carcinoma- not otherwise specified (nos)	20837	34	34	195	dead	stage iiia	male	white	not hispanic or latino	1954	not reported	-1	20837	not reported	not reported	not reported	m0	n1	t3	not reported	not reported	not reported	57	not reported	not reported	35	not reported	195	1	-1	-1	iii	late	not reported	not reported	m0	t3	n1
TCGA-18-3417	lung squamous cell carcinoma- not otherwise specified (nos)	24019	758	758	1097	dead	stage iv	male	not reported	not reported	1941	not reported	-1	24019	not reported	not reported	not reported	m1	n1	t2	not reported	not reported	not reported	65	not reported	not reported	25	not reported	1097	1	-1	-1	iv	late	not reported	not reported	m1	t2	n1
TCGA-85-8582	lung squamous cell carcinoma- not otherwise specified (nos)	18168	1160	4	-1	alive	stage ia	male	white	not hispanic or latino	1963	not reported	-1	18168	not reported	not reported	not reported	m0	n0	t1a	not reported	not reported	no	49	not reported	not reported	40	not reported	1160	0	-1	-1	i	early	not reported	not reported	m0	t1	n0
TCGA-51-4079	lung squamous cell carcinoma- not otherwise specified (nos)	26899	-1	-1	12	dead	stage ib	female	black or african american	not hispanic or latino	1936	not reported	-1	26899	not reported	not reported	not reported	not reported	n0	t2	not reported	not reported	no	73	not reported	not reported	25	not reported	12	1	-1	-1	i	early	not reported	not reported	not reported	t2	n0
TCGA-60-2720	lung squamous cell carcinoma- not otherwise specified (nos)	22238	97	97	-1	alive	stage ib	female	white	not hispanic or latino	1947	not reported	-1	22238	not reported	not reported	not reported	m0	n0	t2	not reported	not reported	no	60	not reported	not reported	110	not reported	97	0	-1	-1	i	early	not reported	not reported	m0	t2	n0
TCGA-34-2596	lung squamous cell carcinoma- not otherwise specified (nos)	25574	80	80	80	dead	stage iib	male	white	not hispanic or latino	1934	not reported	-1	25574	not reported	not reported	not reported	m0	n1	t2	not reported	not reported	not reported	70	not reported	not reported	60	not reported	80	1	-1	-1	ii	early	not reported	not reported	m0	t2	n1
TCGA-96-8170	lung squamous cell carcinoma- not otherwise specified (nos)	27558	531	211	-1	alive	stage iia	female	white	not hispanic or latino	1936	no	-1	27558	not reported	not reported	not reported	m0	n1	t1a	not reported	not reported	no	75	not reported	not reported	50	not reported	531	0	531	0	ii	early	not reported	not reported	m0	t1	n1
TCGA-60-2709	lung squamous cell carcinoma- not otherwise specified (nos)	25453	1505	1505	-1	alive	stage ib	male	black or african american	not hispanic or latino	1935	not reported	-1	25453	not reported	not reported	not reported	mx	n0	t2	not reported	not reported	no	69	not reported	not reported	157	not reported	1505	0	-1	-1	i	early	not reported	not reported	not reported	t2	n0
TCGA-22-5478	lung squamous cell carcinoma- not otherwise specified (nos)	28978	24	24	24	dead	stage ib	male	not reported	not reported	1925	not reported	-1	28978	not reported	not reported	not reported	m0	n0	t2a	not reported	not reported	no	79	not reported	not reported	-1	not reported	24	1	-1	-1	i	early	not reported	not reported	m0	t2	n0
TCGA-21-5782	lung squamous cell carcinoma- not otherwise specified (nos)	24969	962	962	962	dead	stage ib	female	white	not hispanic or latino	1936	not reported	-1	24969	not reported	not reported	not reported	m0	n0	t2	not reported	not reported	not reported	68	not reported	not reported	48	not reported	962	1	-1	-1	i	early	not reported	not reported	m0	t2	n0
TCGA-90-A4ED	lung squamous cell carcinoma- not otherwise specified (nos)	25453	615	244	-1	alive	stage ib	male	white	not hispanic or latino	1943	no	-1	25453	not reported	not reported	not reported	mx	n0	t2a	not reported	not reported	no	69	not reported	not reported	30	not reported	615	0	615	0	i	early	not reported	not reported	not reported	t2	n0
TCGA-33-6737	lung squamous cell carcinoma- not otherwise specified (nos)	26033	-1	-1	601	dead	stage iiia	male	white	not reported	1937	not reported	-1	26033	not reported	not reported	not reported	m0	n2	t2	not reported	not reported	not reported	71	not reported	not reported	20	not reported	601	1	-1	-1	iii	late	not reported	not reported	m0	t2	n2
TCGA-39-5034	lung squamous cell carcinoma- not otherwise specified (nos)	26682	1107	1107	1107	dead	stage iib	female	white	not hispanic or latino	1934	not reported	-1	26682	not reported	not reported	not reported	m0	n0	t3	not reported	not reported	no	73	not reported	not reported	84	no	1107	1	-1	-1	ii	early	not reported	not reported	m0	t3	n0
TCGA-34-5240	lung basaloid squamous cell carcinoma	26735	1541	235	-1	alive	stage iib	female	white	not hispanic or latino	1936	not reported	-1	26735	not reported	not reported	not reported	m0	n1	t2	not reported	not reported	no	73	not reported	not reported	56	not reported	1541	0	-1	-1	ii	early	not reported	not reported	m0	t2	n1
TCGA-56-7222	lung squamous cell carcinoma- not otherwise specified (nos)	22097	13	13	562	dead	stage ib	male	white	not hispanic or latino	1951	not reported	-1	22097	not reported	not reported	not reported	m0	n0	t2a	not reported	not reported	no	60	not reported	not reported	23	not reported	562	1	-1	-1	i	early	not reported	not reported	m0	t2	n0
TCGA-43-8118	lung squamous cell carcinoma- not otherwise specified (nos)	20224	-1	-1	89	dead	stage ia	female	white	not hispanic or latino	1956	no	-1	20224	not reported	not reported	not reported	m0	n0	t1b	not reported	not reported	no	55	not reported	not reported	20	not reported	89	1	89	0	i	early	not reported	not reported	m0	t1	n0
TCGA-22-A5C4	lung squamous cell carcinoma- not otherwise specified (nos)	25629	671	29	-1	alive	stage iia	male	white	not hispanic or latino	1942	no	-1	25629	not reported	not reported	not reported	m0	n0	t2b	not reported	not reported	no	70	not reported	not reported	80	not reported	671	0	671	0	ii	early	not reported	not reported	m0	t2	n0
TCGA-22-4595	lung squamous cell carcinoma- not otherwise specified (nos)	21146	734	734	734	dead	stage iiia	male	white	not reported	1945	not reported	-1	21146	not reported	not reported	not reported	not reported	n2	t3	not reported	not reported	no	57	not reported	not reported	37	not reported	734	1	-1	-1	iii	late	not reported	not reported	not reported	t3	n2
TCGA-66-2744	lung squamous cell carcinoma- not otherwise specified (nos)	26084	30	30	-1	alive	stage iib	male	not reported	not reported	1935	not reported	-1	26084	not reported	not reported	not reported	m0	n1	t2	not reported	not reported	not reported	71	not reported	not reported	63	not reported	30	0	-1	-1	ii	early	not reported	not reported	m0	t2	n1
TCGA-56-7223	lung squamous cell carcinoma- not otherwise specified (nos)	24288	30	30	442	dead	stage iiia	male	white	not hispanic or latino	1945	not reported	-1	24288	not reported	not reported	not reported	mx	n1	t3	not reported	not reported	not reported	66	not reported	not reported	-1	not reported	442	1	-1	-1	iii	late	not reported	not reported	not reported	t3	n1
TCGA-39-5021	lung squamous cell carcinoma- not otherwise specified (nos)	25895	2057	2086	2086	dead	stage ib	male	white	not hispanic or latino	1934	not reported	-1	25895	not reported	not reported	not reported	m0	n0	t2a	not reported	not reported	no	70	not reported	not reported	114	no	2086	1	-1	-1	i	early	not reported	not reported	m0	t2	n0
TCGA-NC-A5HM	lung squamous cell carcinoma- not otherwise specified (nos)	27938	1212	29	-1	alive	stage ib	male	white	not reported	1934	no	-1	27938	not reported	not reported	not reported	m0	n0	t2a	not reported	not reported	no	76	not reported	not reported	50	not reported	1212	0	1212	0	i	early	not reported	not reported	m0	t2	n0
TCGA-NC-A5HK	lung squamous cell carcinoma- not otherwise specified (nos)	21531	128	128	-1	alive	stage iib	female	white	not reported	1952	no	-1	21531	not reported	not reported	not reported	m0	n0	t3	not reported	not reported	no	58	not reported	not reported	40	not reported	128	0	128	0	ii	early	not reported	not reported	m0	t3	n0
TCGA-56-5897	lung squamous cell carcinoma- not otherwise specified (nos)	27118	378	3	-1	alive	stage ia	male	white	not hispanic or latino	1936	not reported	-1	27118	not reported	not reported	not reported	mx	n0	t1b	not reported	not reported	not reported	74	not reported	not reported	-1	not reported	378	0	-1	-1	i	early	not reported	not reported	not reported	t1	n0
TCGA-98-A539	lung squamous cell carcinoma- not otherwise specified (nos)	23098	173	118	-1	alive	stage iib	male	white	not hispanic or latino	1948	no	-1	23098	not reported	not reported	not reported	m0	n0	t3	not reported	not reported	yes	63	not reported	fish	75	no	173	0	173	0	ii	early	not reported	not reported	m0	t3	n0
TCGA-85-A4JB	lung squamous cell carcinoma- not otherwise specified (nos)	27315	942	-10	-1	alive	stage iib	male	white	not hispanic or latino	1938	not reported	-1	27315	not reported	not reported	not reported	m0	n0	t3	not reported	not reported	no	74	not reported	not reported	25	not reported	942	0	-1	-1	ii	early	not reported	not reported	m0	t3	n0
TCGA-37-4135	lung squamous cell carcinoma- not otherwise specified (nos)	25041	207	207	-1	alive	stage ib	male	white	not hispanic or latino	1942	not reported	-1	25041	not reported	not reported	not reported	m0	n0	t2a	not reported	not reported	no	68	not reported	not reported	45	not reported	207	0	-1	-1	i	early	not reported	not reported	m0	t2	n0
TCGA-85-6561	lung squamous cell carcinoma- not otherwise specified (nos)	24234	1224	24	-1	alive	stage ib	male	white	not hispanic or latino	1945	not reported	-1	24234	not reported	not reported	not reported	m0	nx	t2a	not reported	not reported	not reported	66	not reported	not reported	35	not reported	1224	0	-1	-1	i	early	not reported	not reported	m0	t2	nx
TCGA-58-A46M	lung squamous cell carcinoma- not otherwise specified (nos)	22592	1072	707	-1	alive	stage iib	male	white	not hispanic or latino	1949	no	-1	22592	not reported	not reported	not reported	m0	n1	t2b	not reported	not reported	no	61	not reported	not reported	-1	not reported	1072	0	1072	0	ii	early	not reported	not reported	m0	t2	n1
TCGA-63-A5MI	lung squamous cell carcinoma- not otherwise specified (nos)	24040	1784	1399	-1	alive	stage iiia	male	not reported	not reported	-1	no	-1	24040	not reported	not reported	not reported	m0	n2	t2	not reported	not reported	no	65	not reported	not reported	50	not reported	1784	0	1784	0	iii	late	not reported	not reported	m0	t2	n2
TCGA-22-5489	lung squamous cell carcinoma- not otherwise specified (nos)	23618	1912	1912	1912	dead	stage ia	male	white	not reported	1939	not reported	-1	23618	not reported	not reported	not reported	m0	n0	t1b	not reported	not reported	no	64	not reported	not reported	70	not reported	1912	1	-1	-1	i	early	not reported	not reported	m0	t1	n0
TCGA-85-8351	lung squamous cell carcinoma- not otherwise specified (nos)	26437	510	55	-1	alive	stage iia	male	white	not hispanic or latino	1939	not reported	-1	26437	not reported	not reported	not reported	m0	n1	t2a	not reported	not reported	not reported	72	not reported	not reported	60	not reported	510	0	-1	-1	ii	early	not reported	not reported	m0	t2	n1
TCGA-85-A512	lung squamous cell carcinoma- not otherwise specified (nos)	16811	465	0	-1	alive	stage iia	male	white	not hispanic or latino	1966	not reported	-1	16811	not reported	not reported	not reported	m0	n1	t1b	not reported	not reported	no	46	not reported	not reported	25	not reported	465	0	-1	-1	ii	early	not reported	not reported	m0	t1	n1
TCGA-22-1011	lung squamous cell carcinoma- not otherwise specified (nos)	26732	53	53	53	dead	stage ib	male	white	not hispanic or latino	1928	not reported	-1	26732	not reported	not reported	not reported	m0	n0	t2	not reported	not reported	no	73	not reported	not reported	83	not reported	53	1	-1	-1	i	early	not reported	not reported	m0	t2	n0
TCGA-63-A5MG	lung squamous cell carcinoma- not otherwise specified (nos)	24957	2148	1769	-1	alive	stage ib	male	not reported	not reported	-1	no	-1	24957	not reported	not reported	not reported	m0	n0	t2	not reported	not reported	not reported	68	not reported	not reported	-1	not reported	2148	0	2148	0	i	early	not reported	not reported	m0	t2	n0
TCGA-68-7755	lung squamous cell carcinoma- not otherwise specified (nos)	21936	83	83	-1	alive	stage iia	female	white	not hispanic or latino	1951	not reported	-1	21936	not reported	not reported	not reported	m0	n1	t1b	not reported	not reported	no	60	not reported	not reported	78	not reported	83	0	-1	-1	ii	early	not reported	not reported	m0	t1	n1
TCGA-22-5491	lung squamous cell carcinoma- not otherwise specified (nos)	27145	1713	1713	1713	dead	stage ia	male	white	not reported	1929	not reported	-1	27145	not reported	not reported	not reported	m0	n0	t1a	not reported	not reported	no	74	not reported	not reported	57	not reported	1713	1	-1	-1	i	early	not reported	not reported	m0	t1	n0
TCGA-43-7657	lung squamous cell carcinoma- not otherwise specified (nos)	25042	236	48	-1	alive	stage ia	female	white	not hispanic or latino	1943	not reported	-1	25042	not reported	not reported	not reported	mx	n0	t1	not reported	not reported	not reported	68	not reported	not reported	45	not reported	236	0	-1	-1	i	early	not reported	not reported	not reported	t1	n0
TCGA-37-3789	lung squamous cell carcinoma- not otherwise specified (nos)	23782	13	13	-1	alive	stage ib	male	white	not hispanic or latino	1941	not reported	-1	23782	not reported	not reported	not reported	not reported	n0	t2	not reported	not reported	no	65	not reported	not reported	-1	not reported	13	0	-1	-1	i	early	not reported	not reported	not reported	t2	n0
TCGA-85-8479	lung papillary squamous cell caricnoma	24350	468	22	-1	alive	stage ia	male	white	not hispanic or latino	1946	not reported	-1	24350	not reported	not reported	not reported	m0	n0	t1a	not reported	not reported	no	66	not reported	not reported	90	not reported	468	0	-1	-1	i	early	not reported	not reported	m0	t1	n0
TCGA-66-2786	lung squamous cell carcinoma- not otherwise specified (nos)	25051	790	790	-1	alive	stage ia	female	not reported	not reported	1940	not reported	-1	25051	not reported	not reported	not reported	m0	n0	t1	not reported	not reported	not reported	68	not reported	not reported	74	not reported	790	0	-1	-1	i	early	not reported	not reported	m0	t1	n0
TCGA-46-3767	lung squamous cell carcinoma- not otherwise specified (nos)	27912	388	396	-1	alive	stage ia	male	white	not hispanic or latino	1933	not reported	-1	27912	not reported	not reported	not reported	m0	n0	t1a	not reported	not reported	no	76	not reported	not reported	-1	not reported	396	0	-1	-1	i	early	not reported	not reported	m0	t1	n0
TCGA-85-A4PA	lung squamous cell carcinoma- not otherwise specified (nos)	22614	741	-6	-1	alive	stage ib	male	white	not hispanic or latino	1951	not reported	-1	22614	not reported	not reported	not reported	m0	n0	t2a	not reported	not reported	no	61	not reported	not reported	40	not reported	741	0	-1	-1	i	early	not reported	not reported	m0	t2	n0
TCGA-77-6842	lung squamous cell carcinoma- not otherwise specified (nos)	28861	-1	-1	899	dead	stage iib	male	white	not reported	1921	not reported	-1	28861	not reported	not reported	not reported	m0	n1	t2	not reported	not reported	no	79	not reported	not reported	22	not reported	899	1	-1	-1	ii	early	not reported	not reported	m0	t2	n1
TCGA-63-A5MJ	lung squamous cell carcinoma- not otherwise specified (nos)	20018	1824	1524	-1	alive	stage iib	male	not reported	not reported	-1	no	-1	20018	not reported	not reported	not reported	m0	n1	t2	not reported	not reported	no	54	not reported	not reported	-1	not reported	1824	0	1824	0	ii	early	not reported	not reported	m0	t2	n1
TCGA-NC-A5HO	lung squamous cell carcinoma- not otherwise specified (nos)	25694	1336	789	-1	alive	stage iiia	female	white	not reported	1941	no	-1	25694	not reported	not reported	not reported	m0	n1	t3	not reported	not reported	no	70	not reported	not reported	30	not reported	1336	0	1336	0	iii	late	not reported	not reported	m0	t3	n1
TCGA-63-A5MH	lung squamous cell carcinoma- not otherwise specified (nos)	25159	2026	1772	-1	alive	stage ia	male	not reported	not reported	-1	no	-1	25159	not reported	not reported	not reported	m0	n0	t1	not reported	not reported	no	68	not reported	not reported	35	not reported	2026	0	2026	0	i	early	not reported	not reported	m0	t1	n0
TCGA-63-A5MV	lung squamous cell carcinoma- not otherwise specified (nos)	25505	1100	787	-1	alive	stage iia	male	not reported	not reported	-1	no	-1	25505	not reported	not reported	not reported	m0	n0	t2b	not reported	not reported	no	69	not reported	not reported	50	not reported	1100	0	1100	0	ii	early	not reported	not reported	m0	t2	n0
TCGA-85-8481	lung papillary squamous cell caricnoma	25782	21	21	236	dead	stage iib	male	white	not hispanic or latino	1942	not reported	-1	25782	not reported	not reported	not reported	m0	n0	t3	not reported	not reported	no	70	not reported	not reported	80	not reported	236	1	-1	-1	ii	early	not reported	not reported	m0	t3	n0
TCGA-66-2771	lung squamous cell carcinoma- not otherwise specified (nos)	22219	578	578	-1	alive	stage iib	male	not reported	not reported	1947	not reported	-1	22219	not reported	not reported	not reported	m0	n1	t2	not reported	not reported	not reported	60	not reported	not reported	70	not reported	578	0	-1	-1	ii	early	not reported	not reported	m0	t2	n1
TCGA-60-2725	lung squamous cell carcinoma- not otherwise specified (nos)	27073	816	719	-1	alive	stage ib	male	white	not hispanic or latino	1935	not reported	-1	27073	not reported	not reported	not reported	m0	n0	t2	not reported	not reported	no	74	not reported	not reported	56	not reported	816	0	-1	-1	i	early	not reported	not reported	m0	t2	n0
TCGA-63-A5MP	lung squamous cell carcinoma- not otherwise specified (nos)	20818	769	769	-1	alive	stage iib	male	not reported	not reported	-1	yes	511	20818	not reported	not reported	not reported	m0	n1	t2	not reported	not reported	no	56	not reported	not reported	41	not reported	769	0	511	1	ii	early	not reported	not reported	m0	t2	n1
TCGA-77-8140	lung squamous cell carcinoma- not otherwise specified (nos)	24415	-1	-1	351	dead	stage iib	female	not reported	not reported	1937	not reported	-1	24415	not reported	not reported	not reported	m0	n1	t2	not reported	not reported	no	66	not reported	not reported	78	not reported	351	1	-1	-1	ii	early	not reported	not reported	m0	t2	n1
TCGA-37-4141	lung squamous cell carcinoma- not otherwise specified (nos)	24048	12	12	-1	alive	stage ia	female	white	not hispanic or latino	1945	not reported	-1	24048	not reported	not reported	not reported	m0	n0	t1b	not reported	not reported	no	65	not reported	not reported	-1	not reported	12	0	-1	-1	i	early	not reported	not reported	m0	t1	n0
TCGA-60-2711	lung squamous cell carcinoma- not otherwise specified (nos)	23651	1260	889	-1	alive	stage ib	female	white	not hispanic or latino	1943	not reported	-1	23651	not reported	not reported	not reported	m0	n0	t2	not reported	not reported	no	64	not reported	not reported	39	not reported	1260	0	-1	-1	i	early	not reported	not reported	m0	t2	n0
TCGA-43-3394	lung squamous cell carcinoma- not otherwise specified (nos)	19310	822	352	1190	dead	stage ib	male	black or african american	not hispanic or latino	1957	not reported	-1	19310	not reported	not reported	not reported	m0	n0	t2a	not reported	not reported	not reported	52	not reported	not reported	15	not reported	1190	1	-1	-1	i	early	not reported	not reported	m0	t2	n0
TCGA-98-A53D	lung squamous cell carcinoma- not otherwise specified (nos)	24891	22	22	645	dead	stage iib	male	white	not hispanic or latino	1944	no	-1	24891	not reported	not reported	not reported	m0	n0	t3	not reported	not reported	no	68	not reported	not reported	90	not reported	645	1	645	0	ii	early	not reported	not reported	m0	t3	n0
TCGA-33-4566	lung squamous cell carcinoma- not otherwise specified (nos)	14643	-1	-1	5287	dead	stage ib	male	white	not hispanic or latino	1956	not reported	-1	14643	not reported	not reported	not reported	m0	n0	t2	not reported	not reported	not reported	40	not reported	not reported	20	not reported	5287	1	-1	-1	i	early	not reported	not reported	m0	t2	n0
TCGA-39-5029	lung squamous cell carcinoma- not otherwise specified (nos)	24713	-1	-1	740	dead	stage iiia	male	white	hispanic or latino	1939	not reported	-1	24713	not reported	not reported	not reported	m0	n2	t1b	not reported	not reported	no	67	not reported	not reported	192	not reported	740	1	-1	-1	iii	late	not reported	not reported	m0	t1	n2
TCGA-77-8153	lung squamous cell carcinoma- not otherwise specified (nos)	28253	1992	1684	-1	alive	stage ib	female	not reported	not reported	1931	no	-1	28253	not reported	not reported	not reported	m0	n0	t2	not reported	not reported	no	77	not reported	not reported	25	not reported	1992	0	1992	0	i	early	not reported	not reported	m0	t2	n0
TCGA-22-5483	lung squamous cell carcinoma- not otherwise specified (nos)	27109	573	573	573	dead	stage iia	male	white	not reported	1931	not reported	-1	27109	not reported	not reported	not reported	m0	n1	t1a	not reported	not reported	no	74	not reported	not reported	50	not reported	573	1	-1	-1	ii	early	not reported	not reported	m0	t1	n1
TCGA-85-8350	lung squamous cell carcinoma- not otherwise specified (nos)	22526	683	60	-1	alive	stage ia	male	white	not hispanic or latino	1950	not reported	-1	22526	not reported	not reported	not reported	m0	n0	t1b	not reported	not reported	not reported	61	not reported	not reported	40	not reported	683	0	-1	-1	i	early	not reported	not reported	m0	t1	n0
TCGA-60-2696	lung squamous cell carcinoma- not otherwise specified (nos)	27991	109	109	109	dead	stage iia	female	black or african american	not hispanic or latino	1933	not reported	-1	27991	not reported	not reported	not reported	m0	n0	t2	not reported	not reported	no	76	not reported	not reported	15	not reported	109	1	-1	-1	ii	early	not reported	not reported	m0	t2	n0
TCGA-66-2734	lung squamous cell carcinoma- not otherwise specified (nos)	22919	1311	1311	-1	alive	stage ib	female	not reported	not reported	1943	not reported	-1	22919	not reported	not reported	not reported	m0	n0	t2	not reported	not reported	not reported	62	not reported	not reported	40	not reported	1311	0	-1	-1	i	early	not reported	not reported	m0	t2	n0
TCGA-63-A5M9	lung squamous cell carcinoma- not otherwise specified (nos)	-1	0	0	-1	alive	stage iib	female	not reported	not reported	-1	not reported	-1	-1	not reported	not reported	not reported	m0	n1	t2	not reported	not reported	not reported	-1	not reported	not reported	25	not reported	0	0	-1	-1	ii	early	not reported	not reported	m0	t2	n1
TCGA-NK-A5CT	lung squamous cell carcinoma- not otherwise specified (nos)	25726	1997	1761	-1	alive	stage ia	male	white	not hispanic or latino	1938	no	-1	25726	not reported	not reported	not reported	m0	n0	t1	not reported	not reported	no	70	not reported	not reported	80	not reported	1997	0	1997	0	i	early	not reported	not reported	m0	t1	n0
TCGA-63-A5MT	lung squamous cell carcinoma- not otherwise specified (nos)	27263	498	498	-1	alive	stage iib	male	not reported	not reported	-1	yes	427	27263	not reported	not reported	not reported	m0	n0	t3	not reported	not reported	no	74	not reported	not reported	100	not reported	498	0	427	1	ii	early	not reported	not reported	m0	t3	n0
TCGA-60-2721	lung squamous cell carcinoma- not otherwise specified (nos)	27007	983	794	-1	alive	stage ib	male	white	not hispanic or latino	1935	not reported	-1	27007	not reported	not reported	not reported	m0	n0	t2	not reported	not reported	no	73	not reported	not reported	93	not reported	983	0	-1	-1	i	early	not reported	not reported	m0	t2	n0
TCGA-77-8150	lung squamous cell carcinoma- not otherwise specified (nos)	23474	-1	-1	1655	dead	stage iiia	male	not reported	not reported	1943	yes	1278	23474	not reported	not reported	not reported	m0	n1	t3	not reported	not reported	no	64	not reported	not reported	46	not reported	1655	1	1278	1	iii	late	not reported	not reported	m0	t3	n1
TCGA-77-8144	lung squamous cell carcinoma- not otherwise specified (nos)	25796	833	833	-1	alive	stage ib	male	not reported	not reported	1934	not reported	-1	25796	not reported	not reported	not reported	m0	n0	t2	not reported	not reported	no	70	not reported	not reported	59	not reported	833	0	-1	-1	i	early	not reported	not reported	m0	t2	n0
TCGA-37-4133	lung squamous cell carcinoma- not otherwise specified (nos)	23083	238	238	-1	alive	stage iiia	male	white	not hispanic or latino	1947	not reported	-1	23083	not reported	not reported	not reported	m0	n0	t4	not reported	not reported	no	63	not reported	not reported	40	not reported	238	0	-1	-1	iii	late	not reported	not reported	m0	t4	n0
TCGA-22-5477	lung squamous cell carcinoma- not otherwise specified (nos)	24055	1346	1346	1346	dead	stage ia	male	white	not reported	1939	not reported	-1	24055	not reported	not reported	not reported	m0	n0	t1	not reported	not reported	no	65	not reported	not reported	100	not reported	1346	1	-1	-1	i	early	not reported	not reported	m0	t1	n0
TCGA-46-6025	lung squamous cell carcinoma- not otherwise specified (nos)	26168	324	206	-1	alive	stage iib	male	white	not hispanic or latino	1939	not reported	-1	26168	not reported	not reported	not reported	m0	n1	t2b	not reported	not reported	no	71	not reported	not reported	-1	not reported	324	0	-1	-1	ii	early	not reported	not reported	m0	t2	n1
TCGA-34-5232	lung squamous cell carcinoma- not otherwise specified (nos)	27633	2471	1575	-1	alive	stage iia	female	black or african american	not hispanic or latino	1931	not reported	-1	27633	not reported	not reported	not reported	m0	n1	t1	not reported	not reported	not reported	75	not reported	not reported	-1	not reported	2471	0	-1	-1	ii	early	not reported	not reported	m0	t1	n1
TCGA-43-7658	lung squamous cell carcinoma- not otherwise specified (nos)	27734	2023	2023	2378	dead	stage ia	female	white	not reported	1931	not reported	-1	27734	not reported	not reported	not reported	m0	n0	t1	not reported	not reported	not reported	75	not reported	not reported	12	not reported	2378	1	-1	-1	i	early	not reported	not reported	m0	t1	n0
TCGA-94-7557	lung squamous cell carcinoma- not otherwise specified (nos)	26802	-1	-1	5	dead	stage ib	male	black or african american	not hispanic or latino	1938	not reported	-1	26802	not reported	not reported	not reported	m0	n0	t2	not reported	not reported	not reported	73	not reported	not reported	-1	not reported	5	1	-1	-1	i	early	not reported	not reported	m0	t2	n0
TCGA-60-2695	lung basaloid squamous cell carcinoma	27211	642	474	-1	alive	stage ib	female	white	not hispanic or latino	1935	not reported	-1	27211	not reported	not reported	not reported	m0	n0	t2	not reported	not reported	no	74	not reported	not reported	64	not reported	642	0	-1	-1	i	early	not reported	not reported	m0	t2	n0
TCGA-85-A510	lung squamous cell carcinoma- not otherwise specified (nos)	27067	482	0	-1	alive	stage iib	female	white	not hispanic or latino	1938	no	-1	27067	not reported	not reported	not reported	m0	n1	t2b	not reported	not reported	no	74	not reported	not reported	45	not reported	482	0	482	0	ii	early	not reported	not reported	m0	t2	n1
TCGA-56-8082	lung squamous cell carcinoma- not otherwise specified (nos)	29440	455	26	-1	alive	stage iia	female	white	not hispanic or latino	1931	no	-1	29440	not reported	not reported	not reported	mx	n0	t2b	not reported	not reported	not reported	80	not reported	not reported	-1	not reported	455	0	455	0	ii	early	not reported	not reported	not reported	t2	n0
TCGA-94-8490	lung squamous cell carcinoma- not otherwise specified (nos)	25588	153	153	-1	alive	stage iib	male	white	not hispanic or latino	1941	no	-1	25588	not reported	not reported	not reported	m0	n0	t3	not reported	not reported	no	70	not reported	not reported	-1	not reported	153	0	153	0	ii	early	not reported	not reported	m0	t3	n0
TCGA-52-7622	lung squamous cell carcinoma- not otherwise specified (nos)	22807	862	541	-1	alive	stage ia	female	white	hispanic or latino	1948	not reported	-1	22807	not reported	not reported	not reported	m0	n0	t1a	not reported	not reported	no	62	not reported	not reported	22	not reported	862	0	-1	-1	i	early	not reported	not reported	m0	t1	n0
TCGA-22-4591	lung squamous cell carcinoma- not otherwise specified (nos)	29250	623	623	623	dead	stage iiia	male	white	not reported	1921	not reported	-1	29250	not reported	not reported	not reported	m0	n2	t3	not reported	not reported	no	80	not reported	not reported	-1	not reported	623	1	-1	-1	iii	late	not reported	not reported	m0	t3	n2
TCGA-85-8049	lung squamous cell carcinoma- not otherwise specified (nos)	20995	579	60	-1	alive	stage ib	male	white	not hispanic or latino	1954	no	-1	20995	not reported	not reported	not reported	m0	n0	t2a	not reported	not reported	no	57	not reported	not reported	-1	not reported	579	0	579	0	i	early	not reported	not reported	m0	t2	n0
TCGA-77-A5FZ	lung papillary squamous cell caricnoma	23436	-1	-1	3838	dead	stage iiib	male	not reported	not reported	1937	not reported	-1	23436	not reported	not reported	not reported	m0	n0	t4	not reported	not reported	no	64	not reported	not reported	141	not reported	3838	1	-1	-1	iii	late	not reported	not reported	m0	t4	n0
TCGA-85-6560	lung squamous cell carcinoma- not otherwise specified (nos)	21768	1259	11	-1	alive	stage iia	male	white	not hispanic or latino	1952	not reported	-1	21768	not reported	not reported	not reported	m0	n1	t1b	not reported	not reported	not reported	59	not reported	not reported	40	not reported	1259	0	-1	-1	ii	early	not reported	not reported	m0	t1	n1
TCGA-22-4607	lung squamous cell carcinoma- not otherwise specified (nos)	27601	587	587	587	dead	stage ib	male	white	not reported	1928	not reported	-1	27601	not reported	not reported	not reported	m0	n0	t2a	not reported	not reported	no	75	not reported	not reported	20	not reported	587	1	-1	-1	i	early	not reported	not reported	m0	t2	n0
TCGA-85-A53L	lung squamous cell carcinoma- not otherwise specified (nos)	23065	377	13	-1	alive	stage iia	male	asian	not hispanic or latino	1949	not reported	-1	23065	not reported	not reported	not reported	m0	n0	t2b	not reported	not reported	no	63	not reported	not reported	30	not reported	377	0	-1	-1	ii	early	not reported	not reported	m0	t2	n0
TCGA-34-2608	lung squamous cell carcinoma- not otherwise specified (nos)	30958	1000	1000	1000	dead	stage ib	male	white	not hispanic or latino	1915	not reported	-1	30958	not reported	not reported	not reported	m0	n0	t2	not reported	not reported	not reported	84	not reported	not reported	60	not reported	1000	1	-1	-1	i	early	not reported	not reported	m0	t2	n0
TCGA-85-8048	lung squamous cell carcinoma- not otherwise specified (nos)	22907	765	26	-1	alive	stage ia	male	white	not hispanic or latino	1949	no	-1	22907	not reported	not reported	not reported	m0	n0	t1	not reported	not reported	not reported	62	not reported	not reported	50	not reported	765	0	765	0	i	early	not reported	not reported	m0	t1	n0
TCGA-34-5231	lung squamous cell carcinoma- not otherwise specified (nos)	26525	1528	1528	1984	dead	stage ia	male	white	not hispanic or latino	1934	not reported	-1	26525	not reported	not reported	not reported	m0	n0	t1	not reported	not reported	not reported	72	not reported	not reported	50	not reported	1984	1	-1	-1	i	early	not reported	not reported	m0	t1	n0
TCGA-56-7582	lung squamous cell carcinoma- not otherwise specified (nos)	30678	601	26	-1	alive	stage ib	male	white	not hispanic or latino	1928	not reported	-1	30678	not reported	not reported	not reported	m0	n0	t2a	not reported	not reported	not reported	83	not reported	not reported	-1	not reported	601	0	-1	-1	i	early	not reported	not reported	m0	t2	n0
TCGA-58-A46K	lung basaloid squamous cell carcinoma	21867	-1	-1	1045	dead	stage iiia	male	white	not hispanic or latino	1949	yes	735	21867	not reported	not reported	not reported	m0	n2	t2	not reported	not reported	no	59	not reported	not reported	10	not reported	1045	1	735	1	iii	late	not reported	not reported	m0	t2	n2
TCGA-33-AASB	lung squamous cell carcinoma- not otherwise specified (nos)	24183	-1	-1	211	dead	stage ib	male	black or african american	not hispanic or latino	1936	yes	30	24183	not reported	not reported	not reported	mx	n0	t2	not reported	not reported	not reported	66	not reported	not reported	40	not reported	211	1	30	1	i	early	not reported	not reported	not reported	t2	n0
TCGA-J1-A4AH	lung squamous cell carcinoma- not otherwise specified (nos)	25893	581	222	-1	alive	stage iia	male	white	not hispanic or latino	1942	no	-1	25893	not reported	not reported	not reported	mx	n0	t2b	not reported	not reported	no	70	not reported	not reported	100	not reported	581	0	581	0	ii	early	not reported	not reported	not reported	t2	n0
TCGA-56-8624	lung squamous cell carcinoma- not otherwise specified (nos)	30798	420	36	-1	alive	stage iib	male	white	not hispanic or latino	1928	no	-1	30798	not reported	not reported	not reported	mx	n0	t3	not reported	not reported	yes	84	not reported	not reported	20	not reported	420	0	420	0	ii	early	not reported	not reported	not reported	t3	n0
TCGA-77-8009	lung squamous cell carcinoma- not otherwise specified (nos)	25037	1641	1641	1695	dead	stage iib	male	not reported	not reported	1939	not reported	-1	25037	not reported	not reported	not reported	m0	n1	t2	not reported	not reported	no	68	not reported	not reported	97	not reported	1695	1	-1	-1	ii	early	not reported	not reported	m0	t2	n1
TCGA-98-A53J	lung squamous cell carcinoma- not otherwise specified (nos)	28485	630	159	-1	alive	stage ib	male	white	not hispanic or latino	1935	no	-1	28485	not reported	not reported	not reported	m0	n0	t2a	not reported	not reported	yes	77	not reported	fish	100	no	630	0	630	0	i	early	not reported	not reported	m0	t2	n0
TCGA-39-5022	lung squamous cell carcinoma- not otherwise specified (nos)	27856	-1	-1	1679	dead	stage ib	male	white	not hispanic or latino	1929	not reported	-1	27856	not reported	not reported	not reported	m0	n0	t2a	not reported	not reported	no	76	not reported	not reported	35	not reported	1679	1	-1	-1	i	early	not reported	not reported	m0	t2	n0
TCGA-34-2600	lung squamous cell carcinoma- not otherwise specified (nos)	28072	1874	1874	1874	dead	stage ia	female	white	not hispanic or latino	1924	not reported	-1	28072	not reported	not reported	not reported	m0	n0	t1	not reported	not reported	not reported	76	not reported	not reported	50	not reported	1874	1	-1	-1	i	early	not reported	not reported	m0	t1	n0
TCGA-52-7810	lung squamous cell carcinoma- not otherwise specified (nos)	22241	923	923	-1	alive	stage iib	female	white	not hispanic or latino	1948	not reported	-1	22241	not reported	not reported	not reported	m0	n0	t3	not reported	not reported	no	60	not reported	not reported	20	not reported	923	0	-1	-1	ii	early	not reported	not reported	m0	t3	n0
TCGA-33-AASD	lung squamous cell carcinoma- not otherwise specified (nos)	30623	-1	-1	3376	dead	stage ia	male	black or african american	not hispanic or latino	1918	yes	1912	30623	not reported	not reported	not reported	mx	n0	t1	not reported	not reported	not reported	83	not reported	not reported	84	not reported	3376	1	1912	1	i	early	not reported	not reported	not reported	t1	n0
TCGA-77-A5G7	lung squamous cell carcinoma- not otherwise specified (nos)	23090	-1	-1	180	dead	stage ia	male	not reported	not reported	1946	not reported	-1	23090	not reported	not reported	not reported	m0	n0	t1	not reported	not reported	no	63	not reported	not reported	69	not reported	180	1	-1	-1	i	early	not reported	not reported	m0	t1	n0
TCGA-77-A5GF	lung squamous cell carcinoma- not otherwise specified (nos)	25654	839	722	840	dead	stage iia	male	not reported	not reported	1941	yes	722	25654	not reported	not reported	not reported	m0	n1	t2a	not reported	not reported	no	70	not reported	not reported	60	not reported	840	1	722	1	ii	early	not reported	not reported	m0	t2	n1
TCGA-85-7697	lung squamous cell carcinoma- not otherwise specified (nos)	17921	1063	10	-1	alive	stage iib	male	white	not hispanic or latino	1962	not reported	-1	17921	not reported	not reported	not reported	m0	n0	t3	not reported	not reported	not reported	49	not reported	not reported	30	not reported	1063	0	-1	-1	ii	early	not reported	not reported	m0	t3	n0
TCGA-70-6723	lung papillary squamous cell caricnoma	24035	375	0	-1	alive	stage iia	male	asian	not hispanic or latino	1945	not reported	-1	24035	not reported	not reported	not reported	m0	n0	t3	not reported	not reported	not reported	65	not reported	not reported	-1	not reported	375	0	-1	-1	ii	early	not reported	not reported	m0	t3	n0
TCGA-96-7545	lung squamous cell carcinoma- not otherwise specified (nos)	26729	1344	1324	1736	dead	stage ia	male	white	not hispanic or latino	1935	not reported	-1	26729	not reported	not reported	not reported	mx	n0	t1	not reported	not reported	not reported	73	not reported	not reported	116	not reported	1736	1	-1	-1	i	early	not reported	not reported	not reported	t1	n0
TCGA-NK-A5CR	lung squamous cell carcinoma- not otherwise specified (nos)	28126	2542	2178	-1	alive	stage ib	male	not reported	not hispanic or latino	1930	no	-1	28126	not reported	not reported	not reported	mx	n0	t2	not reported	not reported	no	77	not reported	not reported	40	not reported	2542	0	2542	0	i	early	not reported	not reported	not reported	t2	n0
TCGA-O2-A52S	lung squamous cell carcinoma- not otherwise specified (nos)	21182	-1	-1	387	dead	stage iii	female	white	not hispanic or latino	1949	yes	246	21182	not reported	not reported	not reported	mx	n2	t4	not reported	not reported	no	57	not reported	not reported	3	not reported	387	1	246	1	iii	late	not reported	not reported	not reported	t4	n2
TCGA-22-5472	lung squamous cell carcinoma- not otherwise specified (nos)	24482	-1	-1	1975	dead	stage ib	male	white	not hispanic or latino	1938	not reported	-1	24482	not reported	not reported	not reported	m0	n0	t2a	not reported	not reported	no	67	not reported	not reported	35	not reported	1975	1	-1	-1	i	early	not reported	not reported	m0	t2	n0
TCGA-63-A5MS	lung squamous cell carcinoma- not otherwise specified (nos)	28827	2381	2025	-1	alive	stage ib	male	not reported	not reported	-1	no	-1	28827	not reported	not reported	not reported	m0	n0	t2	not reported	not reported	no	78	not reported	not reported	6	not reported	2381	0	2381	0	i	early	not reported	not reported	m0	t2	n0
TCGA-60-2716	not reported	14345	1475	1181	-1	alive	stage iib	male	not reported	not hispanic or latino	1968	not reported	-1	14345	not reported	not reported	not reported	m0	n1	t2	not reported	not reported	no	39	not reported	not reported	-1	not reported	1475	0	-1	-1	ii	early	not reported	not reported	m0	t2	n1
TCGA-77-8128	lung squamous cell carcinoma- not otherwise specified (nos)	21986	-1	-1	1150	dead	stage iiia	male	not reported	not reported	1939	not reported	-1	21986	not reported	not reported	not reported	m0	n2	t2	not reported	not reported	no	60	not reported	not reported	113	not reported	1150	1	-1	-1	iii	late	not reported	not reported	m0	t2	n2
TCGA-66-2780	lung squamous cell carcinoma- not otherwise specified (nos)	23955	-1	-1	366	dead	stage ib	male	not reported	not reported	1942	not reported	-1	23955	not reported	not reported	not reported	m0	n0	t2	not reported	not reported	not reported	65	not reported	not reported	28	not reported	366	1	-1	-1	i	early	not reported	not reported	m0	t2	n0
TCGA-22-5481	lung squamous cell carcinoma- not otherwise specified (nos)	26419	-1	-1	2409	dead	stage iib	female	white	not reported	1930	not reported	-1	26419	not reported	not reported	not reported	m0	n1	t2	not reported	not reported	no	72	not reported	not reported	75	not reported	2409	1	-1	-1	ii	early	not reported	not reported	m0	t2	n1
TCGA-43-6773	lung squamous cell carcinoma- not otherwise specified (nos)	28036	-1	-1	116	dead	stage iib	male	white	not reported	1932	not reported	-1	28036	not reported	not reported	not reported	mx	n1	t2	not reported	not reported	not reported	76	not reported	not reported	-1	not reported	116	1	-1	-1	ii	early	not reported	not reported	not reported	t2	n1
TCGA-34-A5IX	lung squamous cell carcinoma- not otherwise specified (nos)	29391	1031	636	-1	alive	stage iib	male	white	not hispanic or latino	1932	no	-1	29391	not reported	not reported	not reported	m0	n0	t3	not reported	not reported	not reported	80	not reported	not reported	-1	not reported	1031	0	1031	0	ii	early	not reported	not reported	m0	t3	n0
TCGA-66-2791	lung squamous cell carcinoma- not otherwise specified (nos)	24138	-1	-1	153	dead	stage iiib	male	not reported	not reported	1942	not reported	-1	24138	not reported	not reported	not reported	m0	n3	t2	not reported	not reported	not reported	66	not reported	not reported	25	not reported	153	1	-1	-1	iii	late	not reported	not reported	m0	t2	n3
TCGA-39-5028	lung squamous cell carcinoma- not otherwise specified (nos)	27707	52	52	52	dead	stage iiia	male	white	not hispanic or latino	1931	not reported	-1	27707	not reported	not reported	not reported	m0	n1	t4	not reported	not reported	no	75	not reported	not reported	30	no	52	1	-1	-1	iii	late	not reported	not reported	m0	t4	n1
TCGA-63-A5MM	lung squamous cell carcinoma- not otherwise specified (nos)	25348	-1	-1	456	dead	stage iib	female	not reported	not reported	-1	yes	218	25348	not reported	not reported	not reported	m0	n1	t2	not reported	not reported	no	69	not reported	not reported	30	not reported	456	1	218	1	ii	early	not reported	not reported	m0	t2	n1
TCGA-77-7335	lung squamous cell carcinoma- not otherwise specified (nos)	22863	-1	-1	2133	dead	stage iiib	female	white	not reported	1934	not reported	-1	22863	not reported	not reported	not reported	m0	n2	t4	not reported	not reported	no	62	not reported	not reported	52	not reported	2133	1	-1	-1	iii	late	not reported	not reported	m0	t4	n2
TCGA-39-5039	lung squamous cell carcinoma- not otherwise specified (nos)	27781	544	544	544	dead	stage iia	male	white	not reported	1932	not reported	-1	27781	not reported	not reported	not reported	m0	n0	t2b	not reported	not reported	no	76	not reported	not reported	64	no	544	1	-1	-1	ii	early	not reported	not reported	m0	t2	n0
TCGA-52-7809	lung basaloid squamous cell carcinoma	27233	-1	-1	166	dead	stage ib	male	white	not hispanic or latino	1935	not reported	-1	27233	not reported	not reported	not reported	m0	n0	t2	not reported	not reported	no	74	not reported	not reported	60	not reported	166	1	-1	-1	i	early	not reported	not reported	m0	t2	n0
TCGA-22-4596	lung squamous cell carcinoma- not otherwise specified (nos)	25448	17	17	17	dead	stage ib	female	white	not reported	1933	not reported	-1	25448	not reported	not reported	not reported	m0	n0	t1b	not reported	not reported	no	69	not reported	not reported	40	not reported	17	1	-1	-1	i	early	not reported	not reported	m0	t1	n0
TCGA-NC-A5HG	lung basaloid squamous cell carcinoma	21608	1963	1548	-1	alive	stage iiia	male	white	not reported	1950	no	-1	21608	not reported	not reported	not reported	m0	n2	t2	not reported	not reported	no	59	not reported	not reported	80	not reported	1963	0	1963	0	iii	late	not reported	not reported	m0	t2	n2
TCGA-34-5927	lung squamous cell carcinoma- not otherwise specified (nos)	25857	1361	698	-1	alive	stage ia	female	white	not reported	1939	not reported	-1	25857	not reported	not reported	not reported	m0	n0	t1	not reported	not reported	not reported	70	not reported	not reported	-1	not reported	1361	0	-1	-1	i	early	not reported	not reported	m0	t1	n0
TCGA-66-2763	lung squamous cell carcinoma- not otherwise specified (nos)	23315	30	30	-1	alive	stage ib	female	not reported	not reported	1944	not reported	-1	23315	not reported	not reported	not reported	m0	n0	t2	not reported	not reported	not reported	63	not reported	not reported	40	not reported	30	0	-1	-1	i	early	not reported	not reported	m0	t2	n0
TCGA-43-6770	lung squamous cell carcinoma- not otherwise specified (nos)	21683	653	85	-1	alive	stage ib	female	black or african american	not hispanic or latino	1952	not reported	-1	21683	not reported	not reported	not reported	mx	n0	t2a	not reported	not reported	not reported	59	not reported	not reported	34	not reported	653	0	-1	-1	i	early	not reported	not reported	not reported	t2	n0
TCGA-58-A46J	lung squamous cell carcinoma- not otherwise specified (nos)	23653	2589	1973	-1	alive	stage iib	male	white	not hispanic or latino	1942	no	-1	23653	not reported	not reported	not reported	m0	n1	t2	not reported	not reported	no	64	not reported	not reported	-1	not reported	2589	0	2589	0	ii	early	not reported	not reported	m0	t2	n1
TCGA-22-4604	lung squamous cell carcinoma- not otherwise specified (nos)	26952	-1	-1	399	dead	stage iia	male	white	not reported	1930	not reported	-1	26952	not reported	not reported	not reported	m0	n1	t2a	not reported	not reported	no	73	not reported	not reported	50	not reported	399	1	-1	-1	ii	early	not reported	not reported	m0	t2	n1
TCGA-60-2708	lung squamous cell carcinoma- not otherwise specified (nos)	23691	2447	2083	-1	alive	stage iib	female	white	not hispanic or latino	1940	not reported	-1	23691	not reported	not reported	not reported	m0	n1	t2	not reported	not reported	no	64	not reported	not reported	20	not reported	2447	0	-1	-1	ii	early	not reported	not reported	m0	t2	n1
TCGA-NC-A5HL	lung squamous cell carcinoma- not otherwise specified (nos)	26977	-1	-1	88	dead	stage iia	male	white	not reported	1937	no	-1	26977	not reported	not reported	not reported	m0	n0	t2b	not reported	not reported	no	73	not reported	not reported	40	not reported	88	1	88	0	ii	early	not reported	not reported	m0	t2	n0
TCGA-98-8023	lung squamous cell carcinoma- not otherwise specified (nos)	25732	649	308	-1	alive	stage iiia	male	white	not hispanic or latino	1941	no	-1	25732	not reported	not reported	not reported	m0	n1	t3	not reported	not reported	no	70	not reported	not reported	75	no	649	0	649	0	iii	late	not reported	not reported	m0	t3	n1
TCGA-34-5234	lung squamous cell carcinoma- not otherwise specified (nos)	26072	2271	994	-1	alive	stage ia	female	white	not hispanic or latino	1936	not reported	-1	26072	not reported	not reported	not reported	m0	n0	t1	not reported	not reported	not reported	71	not reported	not reported	40	not reported	2271	0	-1	-1	i	early	not reported	not reported	m0	t1	n0
TCGA-56-8628	lung squamous cell carcinoma- not otherwise specified (nos)	28805	616	16	-1	alive	stage ia	male	white	not hispanic or latino	1934	no	-1	28805	not reported	not reported	not reported	mx	n0	t1b	not reported	not reported	not reported	78	not reported	not reported	-1	not reported	616	0	616	0	i	early	not reported	not reported	not reported	t1	n0
TCGA-NC-A5HN	lung squamous cell carcinoma- not otherwise specified (nos)	28151	1499	894	-1	alive	stage iia	male	white	not reported	1933	no	-1	28151	not reported	not reported	not reported	m0	n1	t2a	not reported	not reported	no	77	not reported	not reported	100	not reported	1499	0	1499	0	ii	early	not reported	not reported	m0	t2	n1
TCGA-22-1012	lung squamous cell carcinoma- not otherwise specified (nos)	29273	-1	-1	429	dead	stage ib	female	white	not hispanic or latino	1921	not reported	-1	29273	not reported	not reported	not reported	m0	n0	t2	not reported	not reported	no	80	not reported	not reported	60	not reported	429	1	-1	-1	i	early	not reported	not reported	m0	t2	n0
TCGA-60-2704	lung squamous cell carcinoma- not otherwise specified (nos)	26927	-1	-1	1154	dead	stage iib	male	white	not hispanic or latino	1930	not reported	-1	26927	not reported	not reported	not reported	m0	n1	t2	not reported	not reported	no	73	not reported	not reported	60	not reported	1154	1	-1	-1	ii	early	not reported	not reported	m0	t2	n1
TCGA-66-2766	lung squamous cell carcinoma- not otherwise specified (nos)	19814	31	31	-1	alive	stage iiia	male	not reported	not reported	1953	not reported	-1	19814	not reported	not reported	not reported	m0	n2	t2	not reported	not reported	not reported	54	not reported	not reported	80	not reported	31	0	-1	-1	iii	late	not reported	not reported	m0	t2	n2
TCGA-94-7943	lung squamous cell carcinoma- not otherwise specified (nos)	29282	559	143	-1	alive	stage ia	male	white	not hispanic or latino	1931	not reported	-1	29282	not reported	not reported	not reported	mx	nx	t1b	not reported	not reported	not reported	80	not reported	not reported	30	not reported	559	0	-1	-1	i	early	not reported	not reported	not reported	t1	nx
TCGA-NC-A5HH	lung basaloid squamous cell carcinoma	19485	37	37	-1	alive	stage ia	male	white	not reported	1956	no	-1	19485	not reported	not reported	not reported	m0	n0	t1	not reported	not reported	no	53	not reported	not reported	60	not reported	37	0	37	0	i	early	not reported	not reported	m0	t1	n0
TCGA-63-A5MY	lung squamous cell carcinoma- not otherwise specified (nos)	23276	1052	6	-1	alive	stage ia	male	not reported	not reported	-1	no	-1	23276	not reported	not reported	not reported	m0	n0	t1b	not reported	not reported	not reported	63	not reported	not reported	40	not reported	1052	0	1052	0	i	early	not reported	not reported	m0	t1	n0
TCGA-77-7142	lung squamous cell carcinoma- not otherwise specified (nos)	21796	2227	1286	-1	alive	stage ib	female	white	not reported	1948	not reported	-1	21796	not reported	not reported	not reported	m0	n0	t2	not reported	not reported	no	59	not reported	not reported	52	not reported	2227	0	-1	-1	i	early	not reported	not reported	m0	t2	n0
TCGA-58-8386	lung squamous cell carcinoma- not otherwise specified (nos)	27455	-1	-1	1	dead	stage iv	male	not reported	not reported	1933	no	-1	27455	not reported	not reported	not reported	m1	nx	t3	not reported	not reported	no	75	not reported	not reported	65	not reported	1	1	1	0	iv	late	not reported	not reported	m1	t3	nx
TCGA-34-7107	lung squamous cell carcinoma- not otherwise specified (nos)	25677	-1	-1	34	dead	stage ii	male	white	not hispanic or latino	1941	not reported	-1	25677	not reported	not reported	not reported	m0	n0	t2a	not reported	not reported	not reported	70	not reported	not reported	-1	not reported	34	1	-1	-1	ii	early	not reported	not reported	m0	t2	n0
TCGA-56-8629	lung squamous cell carcinoma- not otherwise specified (nos)	23346	481	34	-1	alive	stage iia	male	white	not hispanic or latino	1949	no	-1	23346	not reported	not reported	not reported	mx	n0	t2b	not reported	not reported	no	63	not reported	not reported	66	not reported	481	0	481	0	ii	early	not reported	not reported	not reported	t2	n0
TCGA-85-8071	lung squamous cell carcinoma- not otherwise specified (nos)	19158	815	14	-1	alive	stage iia	male	white	not hispanic or latino	1959	not reported	-1	19158	not reported	not reported	not reported	m0	n1	t1a	not reported	not reported	no	52	not reported	not reported	30	not reported	815	0	-1	-1	ii	early	not reported	not reported	m0	t1	n1
TCGA-66-2755	lung squamous cell carcinoma- not otherwise specified (nos)	23348	28	28	-1	alive	stage ib	male	not reported	not reported	1944	not reported	-1	23348	not reported	not reported	not reported	m0	n0	t2	not reported	not reported	not reported	63	not reported	not reported	20	not reported	28	0	-1	-1	i	early	not reported	not reported	m0	t2	n0
TCGA-22-4601	lung squamous cell carcinoma- not otherwise specified (nos)	26937	1057	1057	1057	dead	stage iiia	female	white	not reported	1930	not reported	-1	26937	not reported	not reported	not reported	m0	n0	t4	not reported	not reported	no	73	not reported	not reported	60	not reported	1057	1	-1	-1	iii	late	not reported	not reported	m0	t4	n0
TCGA-60-2697	lung squamous cell carcinoma- not otherwise specified (nos)	14984	-1	-1	372	dead	stage iia	male	white	not reported	1951	not reported	-1	14984	not reported	not reported	not reported	m0	n2	t2	not reported	not reported	no	41	not reported	not reported	-1	not reported	372	1	-1	-1	ii	early	not reported	not reported	m0	t2	n2
TCGA-66-2788	lung squamous cell carcinoma- not otherwise specified (nos)	20637	699	699	-1	alive	stage ib	male	not reported	not reported	1952	not reported	-1	20637	not reported	not reported	not reported	m0	n0	t2	not reported	not reported	not reported	56	not reported	not reported	80	not reported	699	0	-1	-1	i	early	not reported	not reported	m0	t2	n0
TCGA-77-A5GA	lung squamous cell carcinoma- not otherwise specified (nos)	27762	1280	36	-1	alive	stage ib	male	not reported	not reported	1934	not reported	-1	27762	not reported	not reported	not reported	m0	n0	t2a	not reported	not reported	no	76	not reported	not reported	99	not reported	1280	0	-1	-1	i	early	not reported	not reported	m0	t2	n0
TCGA-21-5784	lung squamous cell carcinoma- not otherwise specified (nos)	29362	1268	908	-1	alive	stage ib	female	white	not hispanic or latino	1928	not reported	-1	29362	not reported	not reported	not reported	m0	n0	t2	not reported	not reported	not reported	80	not reported	not reported	14	not reported	1268	0	-1	-1	i	early	not reported	not reported	m0	t2	n0
TCGA-21-5783	lung squamous cell carcinoma- not otherwise specified (nos)	27904	-1	-1	2680	dead	stage ib	male	white	not hispanic or latino	1928	not reported	-1	27904	not reported	not reported	not reported	m0	n0	t2	not reported	not reported	no	76	not reported	not reported	-1	not reported	2680	1	-1	-1	i	early	not reported	not reported	m0	t2	n0
TCGA-85-8287	lung squamous cell carcinoma- not otherwise specified (nos)	26401	13	13	23	dead	stage ia	male	white	not hispanic or latino	1939	no	-1	26401	not reported	not reported	not reported	m0	n0	t1b	not reported	not reported	not reported	72	not reported	not reported	50	not reported	23	1	23	0	i	early	not reported	not reported	m0	t1	n0
TCGA-56-A4BW	lung squamous cell carcinoma- not otherwise specified (nos)	20301	585	2	-1	alive	stage iia	male	white	not hispanic or latino	1957	no	-1	20301	not reported	not reported	not reported	m0	n1	t2a	not reported	not reported	not reported	55	not reported	not reported	120	not reported	585	0	585	0	ii	early	not reported	not reported	m0	t2	n1
TCGA-43-6771	lung squamous cell carcinoma- not otherwise specified (nos)	31052	-1	-1	166	dead	stage ib	male	white	not reported	1921	not reported	-1	31052	not reported	not reported	not reported	mx	n0	t2	not reported	not reported	not reported	85	not reported	not reported	40	not reported	166	1	-1	-1	i	early	not reported	not reported	not reported	t2	n0
TCGA-66-2782	lung squamous cell carcinoma- not otherwise specified (nos)	26237	-1	-1	365	dead	stage iib	male	not reported	not reported	1933	not reported	-1	26237	not reported	not reported	not reported	m0	n0	t3	not reported	not reported	not reported	71	not reported	not reported	50	not reported	365	1	-1	-1	ii	early	not reported	not reported	m0	t3	n0
TCGA-22-4593	lung squamous cell carcinoma- not otherwise specified (nos)	28385	1067	1067	1067	dead	stage iia	male	white	not reported	1925	not reported	-1	28385	not reported	not reported	not reported	m0	n0	t2b	not reported	not reported	no	77	not reported	not reported	30	not reported	1067	1	-1	-1	ii	early	not reported	not reported	m0	t2	n0
TCGA-43-2576	lung squamous cell carcinoma- not otherwise specified (nos)	22805	1223	556	-1	alive	stage iiia	female	white	not hispanic or latino	1947	not reported	-1	22805	not reported	not reported	not reported	m0	n2	t2	not reported	not reported	not reported	62	not reported	not reported	20	not reported	1223	0	-1	-1	iii	late	not reported	not reported	m0	t2	n2
TCGA-68-7756	lung squamous cell carcinoma- not otherwise specified (nos)	30763	202	202	-1	alive	stage iiia	male	white	not hispanic or latino	1927	not reported	-1	30763	not reported	not reported	not reported	mx	n1	t4	not reported	not reported	no	84	not reported	not reported	20	not reported	202	0	-1	-1	iii	late	not reported	not reported	not reported	t4	n1
TCGA-63-A5MB	lung squamous cell carcinoma- not otherwise specified (nos)	22930	3123	2758	-1	alive	stage ib	male	not reported	not reported	-1	no	-1	22930	not reported	not reported	not reported	m0	n0	t2	not reported	not reported	no	62	not reported	not reported	25	not reported	3123	0	3123	0	i	early	not reported	not reported	m0	t2	n0
TCGA-85-A4CL	lung squamous cell carcinoma- not otherwise specified (nos)	24005	781	15	921	dead	stage ia	male	white	not hispanic or latino	1947	not reported	-1	24005	not reported	not reported	not reported	m0	n0	t1b	not reported	not reported	no	65	not reported	not reported	40	not reported	921	1	-1	-1	i	early	not reported	not reported	m0	t1	n0
TCGA-56-8305	lung squamous cell carcinoma- not otherwise specified (nos)	26428	105	105	-1	alive	stage ib	male	white	not hispanic or latino	1939	no	-1	26428	not reported	not reported	not reported	m0	n0	t2a	not reported	not reported	not reported	72	not reported	not reported	100	not reported	105	0	105	0	i	early	not reported	not reported	m0	t2	n0
TCGA-39-5024	lung squamous cell carcinoma- not otherwise specified (nos)	23975	2510	2130	-1	alive	stage iiia	female	white	not hispanic or latino	1940	not reported	-1	23975	not reported	not reported	not reported	m0	n2	t2a	not reported	not reported	no	65	not reported	not reported	40	not reported	2510	0	-1	-1	iii	late	not reported	not reported	m0	t2	n2
TCGA-63-7022	lung squamous cell carcinoma- not otherwise specified (nos)	-1	2073	-1	-1	alive	stage ia	female	not reported	not reported	-1	not reported	-1	-1	not reported	not reported	not reported	m0	n0	t1	not reported	not reported	not reported	-1	not reported	not reported	30	not reported	2073	0	-1	-1	i	early	not reported	not reported	m0	t1	n0
TCGA-18-3412	lung squamous cell carcinoma- not otherwise specified (nos)	19025	-1	-1	345	dead	stage ib	male	white	not hispanic or latino	1953	not reported	-1	19025	not reported	not reported	not reported	m0	n0	t2	not reported	not reported	not reported	52	not reported	not reported	25	not reported	345	1	-1	-1	i	early	not reported	not reported	m0	t2	n0
TCGA-63-5128	lung squamous cell carcinoma- not otherwise specified (nos)	-1	-1	-1	-1	dead	stage ib	male	not reported	not reported	-1	not reported	-1	-1	not reported	not reported	not reported	m0	n0	t2	not reported	not reported	no	-1	not reported	not reported	-1	not reported	-1	-1	-1	-1	i	early	not reported	not reported	m0	t2	n0
TCGA-85-A5B5	lung squamous cell carcinoma- not otherwise specified (nos)	21450	111	111	-1	alive	stage ia	male	white	not hispanic or latino	1954	no	-1	21450	not reported	not reported	not reported	m0	n0	t1b	not reported	not reported	no	58	not reported	not reported	15	not reported	111	0	111	0	i	early	not reported	not reported	m0	t1	n0
TCGA-96-A4JL	lung squamous cell carcinoma- not otherwise specified (nos)	28686	842	183	-1	alive	stage iia	female	asian	not hispanic or latino	1934	no	-1	28686	not reported	not reported	not reported	m0	n1	t2a	not reported	not reported	no	78	not reported	not reported	-1	not reported	842	0	842	0	ii	early	not reported	not reported	m0	t2	n1
TCGA-46-3765	lung squamous cell carcinoma- not otherwise specified (nos)	21762	405	396	-1	alive	stage ia	female	white	not hispanic or latino	1950	not reported	-1	21762	not reported	not reported	not reported	m0	n0	t1	not reported	not reported	no	59	not reported	not reported	-1	not reported	405	0	-1	-1	i	early	not reported	not reported	m0	t1	n0
TCGA-18-3416	lung squamous cell carcinoma- not otherwise specified (nos)	30435	956	956	973	dead	stage iib	male	not reported	not reported	1923	not reported	-1	30435	not reported	not reported	not reported	m0	n1	t2	not reported	not reported	not reported	83	not reported	not reported	40	not reported	973	1	-1	-1	ii	early	not reported	not reported	m0	t2	n1
TCGA-85-7844	lung squamous cell carcinoma- not otherwise specified (nos)	26141	911	38	-1	alive	stage ib	male	white	not hispanic or latino	1940	not reported	-1	26141	not reported	not reported	not reported	m0	n0	t2a	not reported	not reported	not reported	71	not reported	not reported	40	not reported	911	0	-1	-1	i	early	not reported	not reported	m0	t2	n0
TCGA-63-A5MU	lung squamous cell carcinoma- not otherwise specified (nos)	17801	-1	-1	-1	dead	stage iib	male	not reported	not reported	-1	yes	420	17801	not reported	not reported	not reported	m0	n1	t2b	not reported	not reported	no	48	not reported	not reported	15	not reported	-1	-1	420	1	ii	early	not reported	not reported	m0	t2	n1
TCGA-56-8309	lung squamous cell carcinoma- not otherwise specified (nos)	24382	428	18	-1	alive	stage ia	male	white	not hispanic or latino	1946	no	-1	24382	not reported	not reported	not reported	mx	n0	t1b	not reported	not reported	not reported	66	not reported	not reported	50	not reported	428	0	428	0	i	early	not reported	not reported	not reported	t1	n0
TCGA-33-AAS8	lung squamous cell carcinoma- not otherwise specified (nos)	21675	-1	-1	1114	dead	stage ia	female	black or african american	not hispanic or latino	1939	no	-1	21675	not reported	not reported	not reported	mx	n0	t1	not reported	not reported	not reported	59	not reported	not reported	60	not reported	1114	1	1114	0	i	early	not reported	not reported	not reported	t1	n0
TCGA-56-8504	lung squamous cell carcinoma- not otherwise specified (nos)	27210	510	178	-1	alive	stage ib	male	white	not hispanic or latino	1938	no	-1	27210	not reported	not reported	not reported	mx	n0	t2a	not reported	not reported	not reported	74	not reported	not reported	-1	not reported	510	0	510	0	i	early	not reported	not reported	not reported	t2	n0
TCGA-21-1072	lung squamous cell carcinoma- not otherwise specified (nos)	27397	3016	3016	-1	alive	stage ib	male	white	not hispanic or latino	1926	not reported	-1	27397	not reported	not reported	not reported	m0	n0	t2	not reported	not reported	not reported	75	not reported	not reported	-1	not reported	3016	0	-1	-1	i	early	not reported	not reported	m0	t2	n0
TCGA-85-7710	lung squamous cell carcinoma- not otherwise specified (nos)	21790	42	0	-1	alive	stage ia	female	white	not hispanic or latino	1952	not reported	-1	21790	not reported	not reported	not reported	m0	n0	t1b	not reported	not reported	not reported	59	not reported	not reported	45	not reported	42	0	-1	-1	i	early	not reported	not reported	m0	t1	n0
TCGA-60-2712	lung squamous cell carcinoma- not otherwise specified (nos)	29131	274	274	274	dead	stage iib	female	white	not hispanic or latino	1927	not reported	-1	29131	not reported	not reported	not reported	m0	n1	t2	not reported	not reported	no	79	not reported	not reported	10	not reported	274	1	-1	-1	ii	early	not reported	not reported	m0	t2	n1
TCGA-85-8070	lung squamous cell carcinoma- not otherwise specified (nos)	26183	960	43	-1	alive	stage ib	male	white	not hispanic or latino	1940	not reported	-1	26183	not reported	not reported	not reported	m0	n0	t2	not reported	not reported	no	71	not reported	not reported	50	not reported	960	0	-1	-1	i	early	not reported	not reported	m0	t2	n0
TCGA-33-4586	lung squamous cell carcinoma- not otherwise specified (nos)	21148	-1	-1	428	dead	stage iiia	male	white	not hispanic or latino	1950	not reported	-1	21148	not reported	not reported	not reported	m0	n2	t2	not reported	not reported	not reported	57	not reported	not reported	108	not reported	428	1	-1	-1	iii	late	not reported	not reported	m0	t2	n2
TCGA-60-2719	lung squamous cell carcinoma- not otherwise specified (nos)	30379	1297	932	-1	alive	stage ib	female	white	not hispanic or latino	1924	not reported	-1	30379	not reported	not reported	not reported	m0	n0	t1	not reported	not reported	no	83	not reported	not reported	7	not reported	1297	0	-1	-1	i	early	not reported	not reported	m0	t1	n0
TCGA-56-A4ZK	lung squamous cell carcinoma- not otherwise specified (nos)	28039	570	4	-1	alive	stage ib	female	white	not hispanic or latino	1936	no	-1	28039	not reported	not reported	not reported	m0	n0	t2	not reported	not reported	no	76	not reported	not reported	-1	not reported	570	0	570	0	i	early	not reported	not reported	m0	t2	n0
TCGA-60-2703	lung squamous cell carcinoma- not otherwise specified (nos)	27003	-1	-1	2945	dead	stage iib	male	white	not hispanic or latino	1929	not reported	-1	27003	not reported	not reported	not reported	m0	n1	t2	not reported	not reported	not reported	73	not reported	not reported	50	not reported	2945	1	-1	-1	ii	early	not reported	not reported	m0	t2	n1
TCGA-66-2765	lung squamous cell carcinoma- not otherwise specified (nos)	23465	61	61	-1	alive	stage ib	male	not reported	not reported	1943	not reported	-1	23465	not reported	not reported	not reported	m0	n0	t2	not reported	not reported	not reported	64	not reported	not reported	108	not reported	61	0	-1	-1	i	early	not reported	not reported	m0	t2	n0
TCGA-98-A53C	lung squamous cell carcinoma- not otherwise specified (nos)	28146	822	311	-1	alive	stage ia	female	white	not hispanic or latino	1935	no	-1	28146	not reported	not reported	not reported	m0	n0	t1a	not reported	not reported	no	77	not reported	not reported	112	not reported	822	0	822	0	i	early	not reported	not reported	m0	t1	n0
TCGA-77-6844	lung squamous cell carcinoma- not otherwise specified (nos)	27220	-1	-1	2284	dead	stage iiia	male	white	not reported	1928	not reported	-1	27220	not reported	not reported	not reported	m0	n1	t3	not reported	not reported	no	74	not reported	not reported	45	not reported	2284	1	-1	-1	iii	late	not reported	not reported	m0	t3	n1
TCGA-58-8393	lung squamous cell carcinoma- not otherwise specified (nos)	25132	1058	20	-1	alive	stage ib	female	white	not hispanic or latino	1942	no	-1	25132	not reported	not reported	not reported	m0	n0	t2a	not reported	not reported	no	68	not reported	not reported	7	not reported	1058	0	1058	0	i	early	not reported	not reported	m0	t2	n0
TCGA-77-A5GH	lung squamous cell carcinoma- not otherwise specified (nos)	29843	1182	713	-1	alive	stage ib	male	not reported	not reported	1930	not reported	-1	29843	not reported	not reported	not reported	m0	n0	t2a	not reported	not reported	no	81	not reported	not reported	11	not reported	1182	0	-1	-1	i	early	not reported	not reported	m0	t2	n0
TCGA-O2-A52W	lung squamous cell carcinoma- not otherwise specified (nos)	23156	-1	-1	261	dead	stage i	male	black or african american	not hispanic or latino	1943	no	-1	23156	not reported	not reported	not reported	mx	n0	t2	not reported	not reported	no	63	not reported	not reported	2	not reported	261	1	261	0	i	early	not reported	not reported	not reported	t2	n0
TCGA-56-8503	lung squamous cell carcinoma- not otherwise specified (nos)	28095	41	41	-1	alive	stage iib	female	white	not hispanic or latino	1936	no	-1	28095	not reported	not reported	not reported	m0	n0	t3	not reported	not reported	not reported	76	not reported	not reported	91	not reported	41	0	41	0	ii	early	not reported	not reported	m0	t3	n0
TCGA-46-6026	lung squamous cell carcinoma- not otherwise specified (nos)	29890	423	18	-1	alive	stage iib	male	white	not hispanic or latino	1929	not reported	-1	29890	not reported	not reported	not reported	m0	n1	t2a	not reported	not reported	no	81	not reported	not reported	-1	not reported	423	0	-1	-1	ii	early	not reported	not reported	m0	t2	n1
TCGA-33-4538	lung squamous cell carcinoma- not otherwise specified (nos)	24174	-1	-1	2979	dead	stage iiia	male	white	hispanic or latino	1936	not reported	-1	24174	not reported	not reported	not reported	m0	n2	t2	not reported	not reported	not reported	66	not reported	not reported	51	not reported	2979	1	-1	-1	iii	late	not reported	not reported	m0	t2	n2
TCGA-77-7139	lung squamous cell carcinoma- not otherwise specified (nos)	20632	4261	2737	-1	alive	stage iib	male	white	not reported	1946	not reported	-1	20632	not reported	not reported	not reported	m0	n1	t2	not reported	not reported	no	56	not reported	not reported	2	not reported	4261	0	-1	-1	ii	early	not reported	not reported	m0	t2	n1
TCGA-56-7823	lung squamous cell carcinoma- not otherwise specified (nos)	21344	1011	77	-1	alive	stage iia	female	white	not hispanic or latino	1953	no	-1	21344	not reported	not reported	not reported	m0	n1	t1b	not reported	not reported	not reported	58	not reported	not reported	80	not reported	1011	0	1011	0	ii	early	not reported	not reported	m0	t1	n1
TCGA-58-A46L	lung basaloid squamous cell carcinoma	26685	1723	1113	-1	alive	stage iiia	male	white	not hispanic or latino	1935	no	-1	26685	not reported	not reported	not reported	m0	n2	t2	not reported	not reported	no	73	not reported	not reported	-1	not reported	1723	0	1723	0	iii	late	not reported	not reported	m0	t2	n2
TCGA-68-8250	lung squamous cell carcinoma- not otherwise specified (nos)	24118	244	244	-1	alive	stage ia	male	black or african american	not hispanic or latino	1945	no	-1	24118	not reported	not reported	not reported	mx	n0	t1a	not reported	not reported	not reported	66	not reported	not reported	50	not reported	244	0	244	0	i	early	not reported	not reported	not reported	t1	n0
TCGA-34-2609	lung squamous cell carcinoma- not otherwise specified (nos)	29871	951	951	951	dead	stage iib	male	black or african american	not hispanic or latino	1923	not reported	-1	29871	not reported	not reported	not reported	m0	n1	t2	not reported	not reported	no	81	not reported	not reported	60	not reported	951	1	-1	-1	ii	early	not reported	not reported	m0	t2	n1
TCGA-O2-A52V	lung squamous cell carcinoma- not otherwise specified (nos)	27449	-1	-1	1335	dead	stage ii	female	black or african american	not hispanic or latino	1931	yes	690	27449	not reported	not reported	not reported	mx	n0	t3	not reported	not reported	no	75	not reported	not reported	1	not reported	1335	1	690	1	ii	early	not reported	not reported	not reported	t3	n0
TCGA-39-5011	lung squamous cell carcinoma- not otherwise specified (nos)	25788	4053	1454	-1	alive	stage ia	female	white	not hispanic or latino	1932	not reported	-1	25788	not reported	not reported	not reported	m0	n0	t1b	not reported	not reported	no	70	not reported	not reported	45	not reported	4053	0	-1	-1	i	early	not reported	not reported	m0	t1	n0
TCGA-77-7338	lung squamous cell carcinoma- not otherwise specified (nos)	23480	-1	-1	5	dead	stage ib	male	white	not reported	1931	not reported	-1	23480	not reported	not reported	not reported	m0	n0	t2	not reported	not reported	no	64	not reported	not reported	41	not reported	5	1	-1	-1	i	early	not reported	not reported	m0	t2	n0
TCGA-43-6143	lung basaloid squamous cell carcinoma	25820	699	214	-1	alive	stage ib	male	white	not hispanic or latino	1940	not reported	-1	25820	not reported	not reported	not reported	m0	n0	t2	not reported	not reported	not reported	70	not reported	not reported	114	not reported	699	0	-1	-1	i	early	not reported	not reported	m0	t2	n0
TCGA-77-7141	lung squamous cell carcinoma- not otherwise specified (nos)	23584	15	15	-1	alive	stage ib	male	white	not reported	1939	not reported	-1	23584	not reported	not reported	not reported	m0	n0	t2	not reported	not reported	no	64	not reported	not reported	70	not reported	15	0	-1	-1	i	early	not reported	not reported	m0	t2	n0
TCGA-77-A5GB	lung squamous cell carcinoma- not otherwise specified (nos)	32872	-1	-1	937	dead	stage ib	male	not reported	not reported	1920	yes	0	32872	not reported	not reported	not reported	m0	nx	t2a	not reported	not reported	no	90	not reported	not reported	52	not reported	937	1	0	1	i	early	not reported	not reported	m0	t2	nx
TCGA-46-3768	lung squamous cell carcinoma- not otherwise specified (nos)	21307	4	-1	299	dead	stage iiia	male	white	not hispanic or latino	1952	not reported	-1	21307	not reported	not reported	not reported	m0	n1	t3	not reported	not reported	no	58	not reported	not reported	-1	not reported	299	1	-1	-1	iii	late	not reported	not reported	m0	t3	n1
TCGA-43-3920	lung squamous cell carcinoma- not otherwise specified (nos)	26059	1007	268	-1	alive	stage ib	male	white	not hispanic or latino	1938	not reported	-1	26059	not reported	not reported	not reported	m0	n0	t2	not reported	not reported	not reported	71	not reported	not reported	50	not reported	1007	0	-1	-1	i	early	not reported	not reported	m0	t2	n0
TCGA-77-8136	lung squamous cell carcinoma- not otherwise specified (nos)	27193	-1	-1	1189	dead	stage iib	female	not reported	not reported	1928	yes	301	27193	not reported	not reported	not reported	m0	n1	t2	not reported	not reported	no	74	not reported	not reported	135	not reported	1189	1	301	1	ii	early	not reported	not reported	m0	t2	n1
TCGA-18-3408	lung squamous cell carcinoma- not otherwise specified (nos)	28171	2099	2099	2304	dead	stage ib	female	white	not hispanic or latino	1927	not reported	-1	28171	not reported	not reported	not reported	m0	n0	t2	not reported	not reported	not reported	77	not reported	not reported	30	not reported	2304	1	-1	-1	i	early	not reported	not reported	m0	t2	n0
TCGA-56-7580	lung squamous cell carcinoma- not otherwise specified (nos)	30740	925	40	-1	alive	stage ib	male	white	not hispanic or latino	1927	not reported	-1	30740	not reported	not reported	not reported	m0	n0	t2a	not reported	not reported	not reported	84	not reported	not reported	-1	not reported	925	0	-1	-1	i	early	not reported	not reported	m0	t2	n0
TCGA-39-5040	lung squamous cell carcinoma- not otherwise specified (nos)	21790	-1	-1	519	dead	stage iiia	male	white	not hispanic or latino	1949	not reported	-1	21790	not reported	not reported	not reported	m0	n2	t2a	not reported	not reported	no	59	not reported	not reported	60	not reported	519	1	-1	-1	iii	late	not reported	not reported	m0	t2	n2
TCGA-22-5474	lung squamous cell carcinoma- not otherwise specified (nos)	27271	445	445	445	dead	stage ib	male	white	not reported	1931	not reported	-1	27271	not reported	not reported	not reported	m0	n0	t2a	not reported	not reported	no	74	not reported	not reported	50	not reported	445	1	-1	-1	i	early	not reported	not reported	m0	t2	n0
TCGA-66-2800	lung squamous cell carcinoma- not otherwise specified (nos)	25810	1492	1492	-1	alive	stage iiib	male	not reported	not reported	1934	not reported	-1	25810	not reported	not reported	not reported	m0	n0	t4	not reported	not reported	not reported	70	not reported	not reported	75	not reported	1492	0	-1	-1	iii	late	not reported	not reported	m0	t4	n0
TCGA-43-8115	lung squamous cell carcinoma- not otherwise specified (nos)	26406	407	202	-1	alive	stage iia	female	white	not hispanic or latino	1939	no	-1	26406	not reported	not reported	not reported	mx	n1	t2a	not reported	not reported	not reported	72	not reported	not reported	55	not reported	407	0	407	0	ii	early	not reported	not reported	not reported	t2	n1
TCGA-66-2783	lung squamous cell carcinoma- not otherwise specified (nos)	24686	759	759	-1	alive	stage iiib	male	not reported	not reported	1941	not reported	-1	24686	not reported	not reported	not reported	m0	n3	t2	not reported	not reported	not reported	67	not reported	not reported	65	not reported	759	0	-1	-1	iii	late	not reported	not reported	m0	t2	n3
TCGA-43-2581	lung squamous cell carcinoma- not otherwise specified (nos)	17447	1176	399	-1	alive	stage iiia	female	white	not hispanic or latino	1962	not reported	-1	17447	not reported	not reported	not reported	m0	n1	t3	not reported	not reported	not reported	47	not reported	not reported	30	not reported	1176	0	-1	-1	iii	late	not reported	not reported	m0	t3	n1
TCGA-85-8052	lung squamous cell carcinoma- not otherwise specified (nos)	19671	734	16	-1	alive	stage iib	male	white	not hispanic or latino	1958	no	-1	19671	not reported	not reported	not reported	m0	n0	t3	not reported	not reported	no	53	not reported	not reported	40	not reported	734	0	734	0	ii	early	not reported	not reported	m0	t3	n0
TCGA-39-5037	lung squamous cell carcinoma- not otherwise specified (nos)	23868	1690	24	-1	alive	stage iia	male	white	not hispanic or latino	1942	not reported	-1	23868	not reported	not reported	not reported	m0	n1	t1b	not reported	not reported	no	65	not reported	not reported	26	not reported	1690	0	-1	-1	ii	early	not reported	not reported	m0	t1	n1
TCGA-85-7696	lung squamous cell carcinoma- not otherwise specified (nos)	23413	1111	18	-1	alive	stage ia	male	white	not hispanic or latino	1947	not reported	-1	23413	not reported	not reported	not reported	m0	n0	t1	not reported	not reported	not reported	64	not reported	not reported	30	not reported	1111	0	-1	-1	i	early	not reported	not reported	m0	t1	n0
TCGA-60-2714	lung squamous cell carcinoma- not otherwise specified (nos)	24169	1531	512	-1	alive	stage iib	female	white	not hispanic or latino	1940	not reported	-1	24169	not reported	not reported	not reported	m0	n1	t2	not reported	not reported	no	66	not reported	not reported	90	not reported	1531	0	-1	-1	ii	early	not reported	not reported	m0	t2	n1
TCGA-22-4605	lung squamous cell carcinoma- not otherwise specified (nos)	28623	-1	-1	974	dead	stage ib	female	not reported	not reported	1925	not reported	-1	28623	not reported	not reported	not reported	m0	n0	t2	not reported	not reported	no	78	not reported	not reported	75	not reported	974	1	-1	-1	i	early	not reported	not reported	m0	t2	n0
TCGA-56-8626	lung squamous cell carcinoma- not otherwise specified (nos)	21908	17	17	302	dead	stage ia	male	white	not hispanic or latino	1953	no	-1	21908	not reported	not reported	not reported	mx	n0	t1a	not reported	not reported	not reported	59	not reported	not reported	50	not reported	302	1	302	0	i	early	not reported	not reported	not reported	t1	n0
TCGA-34-8456	lung squamous cell carcinoma- not otherwise specified (nos)	26183	804	203	-1	alive	stage iia	female	white	not hispanic or latino	1940	no	-1	26183	not reported	not reported	not reported	m0	n1	t2a	not reported	not reported	not reported	71	not reported	not reported	20	not reported	804	0	804	0	ii	early	not reported	not reported	m0	t2	n1
TCGA-34-5928	lung squamous cell carcinoma- not otherwise specified (nos)	30334	1196	169	-1	alive	stage iib	female	white	not hispanic or latino	1927	not reported	-1	30334	not reported	not reported	not reported	m0	n1	t2	not reported	not reported	not reported	83	not reported	not reported	40	not reported	1196	0	-1	-1	ii	early	not reported	not reported	m0	t2	n1
TCGA-66-2770	lung squamous cell carcinoma- not otherwise specified (nos)	28945	700	700	-1	alive	stage ib	male	not reported	not reported	1928	not reported	-1	28945	not reported	not reported	not reported	m0	n0	t2	not reported	not reported	not reported	79	not reported	not reported	25	not reported	700	0	-1	-1	i	early	not reported	not reported	m0	t2	n0
TCGA-77-A5G8	lung squamous cell carcinoma- not otherwise specified (nos)	25921	1884	1290	-1	alive	stage iib	male	not reported	not reported	1939	not reported	-1	25921	not reported	not reported	not reported	m0	n0	t3	not reported	not reported	no	70	not reported	not reported	90	not reported	1884	0	-1	-1	ii	early	not reported	not reported	m0	t3	n0
TCGA-66-2787	lung squamous cell carcinoma- not otherwise specified (nos)	21124	1217	1217	-1	alive	stage ia	male	not reported	not reported	1947	not reported	-1	21124	not reported	not reported	not reported	m0	n0	t1	not reported	not reported	not reported	57	not reported	not reported	40	not reported	1217	0	-1	-1	i	early	not reported	not reported	m0	t1	n0
TCGA-60-2706	lung squamous cell carcinoma- not otherwise specified (nos)	21477	2820	2500	-1	alive	stage ia	male	white	not hispanic or latino	1945	not reported	-1	21477	not reported	not reported	not reported	m0	n0	t1	not reported	not reported	no	58	not reported	not reported	51	not reported	2820	0	-1	-1	i	early	not reported	not reported	m0	t1	n0
TCGA-66-2737	lung squamous cell carcinoma- not otherwise specified (nos)	26390	61	61	-1	alive	stage iib	male	not reported	not reported	1933	not reported	-1	26390	not reported	not reported	not reported	m0	n1	t2	not reported	not reported	not reported	72	not reported	not reported	40	not reported	61	0	-1	-1	ii	early	not reported	not reported	m0	t2	n1
TCGA-51-4080	lung basaloid squamous cell carcinoma	24054	-1	-1	12	dead	stage iiib	male	black or african american	not hispanic or latino	1944	not reported	-1	24054	not reported	not reported	not reported	not reported	n1	t4	not reported	not reported	no	65	not reported	not reported	-1	not reported	12	1	-1	-1	iii	late	not reported	not reported	not reported	t4	n1
TCGA-77-8156	lung squamous cell carcinoma- not otherwise specified (nos)	22198	1106	10	-1	alive	stage ib	male	not reported	not reported	1950	not reported	-1	22198	not reported	not reported	not reported	m0	n0	t2a	not reported	not reported	no	60	not reported	not reported	57	not reported	1106	0	-1	-1	i	early	not reported	not reported	m0	t2	n0
TCGA-94-8035	lung squamous cell carcinoma- not otherwise specified (nos)	23399	122	111	-1	alive	stage iib	male	white	not hispanic or latino	1947	no	-1	23399	not reported	not reported	not reported	mx	n0	t3	not reported	not reported	not reported	64	not reported	not reported	50	not reported	122	0	122	0	ii	early	not reported	not reported	not reported	t3	n0
TCGA-43-8116	lung squamous cell carcinoma- not otherwise specified (nos)	26790	358	193	-1	alive	stage ia	male	white	not hispanic or latino	1938	no	-1	26790	not reported	not reported	not reported	m0	n0	t1b	not reported	not reported	not reported	73	not reported	not reported	35	not reported	358	0	358	0	i	early	not reported	not reported	m0	t1	n0
TCGA-77-8130	lung squamous cell carcinoma- not otherwise specified (nos)	25260	4765	2522	-1	alive	stage iib	male	not reported	not reported	1931	not reported	-1	25260	not reported	not reported	not reported	m0	n1	t2	not reported	not reported	no	69	not reported	not reported	32	not reported	4765	0	-1	-1	ii	early	not reported	not reported	m0	t2	n1
TCGA-98-7454	lung squamous cell carcinoma- not otherwise specified (nos)	26827	652	115	-1	alive	stage ib	male	white	not hispanic or latino	1938	not reported	-1	26827	not reported	not reported	not reported	m0	n0	t2a	not reported	not reported	yes	73	not reported	not reported	60	not reported	652	0	-1	-1	i	early	not reported	not reported	m0	t2	n0
TCGA-O2-A52Q	lung squamous cell carcinoma- not otherwise specified (nos)	16429	-1	-1	113	dead	stage iii	female	white	not hispanic or latino	1961	yes	87	16429	not reported	not reported	not reported	mx	n1	t3	not reported	not reported	no	44	not reported	not reported	1	not reported	113	1	87	1	iii	late	not reported	not reported	not reported	t3	n1
TCGA-34-5929	lung squamous cell carcinoma- not otherwise specified (nos)	28844	-1	-1	151	dead	stage ib	female	white	not hispanic or latino	1932	not reported	-1	28844	not reported	not reported	not reported	m0	n0	t2	not reported	not reported	yes	78	not reported	not reported	40	not reported	151	1	-1	-1	i	early	not reported	not reported	m0	t2	n0
TCGA-96-A4JK	lung squamous cell carcinoma- not otherwise specified (nos)	23974	589	273	-1	alive	stage iia	male	white	not hispanic or latino	1947	no	-1	23974	not reported	not reported	not reported	m0	n1	t2a	not reported	not reported	no	65	not reported	not reported	110	not reported	589	0	589	0	ii	early	not reported	not reported	m0	t2	n1
TCGA-66-2727	lung squamous cell carcinoma- not otherwise specified (nos)	20150	-1	-1	516	dead	stage ib	female	not reported	not reported	1949	not reported	-1	20150	not reported	not reported	not reported	m0	n0	t2	not reported	not reported	not reported	55	not reported	not reported	56	not reported	516	1	-1	-1	i	early	not reported	not reported	m0	t2	n0
TCGA-22-5482	lung squamous cell carcinoma- not otherwise specified (nos)	29657	357	357	357	dead	stage ib	male	white	not reported	1924	not reported	-1	29657	not reported	not reported	not reported	m0	n0	t2a	not reported	not reported	no	81	not reported	not reported	60	not reported	357	1	-1	-1	i	early	not reported	not reported	m0	t2	n0
TCGA-43-A56U	lung squamous cell carcinoma- not otherwise specified (nos)	27847	432	55	-1	alive	stage ia	female	white	not hispanic or latino	1936	no	-1	27847	not reported	not reported	not reported	mx	n0	t1b	not reported	not reported	not reported	76	not reported	not reported	20	not reported	432	0	432	0	i	early	not reported	not reported	not reported	t1	n0
TCGA-85-7699	lung squamous cell carcinoma- not otherwise specified (nos)	26965	1	1	1001	dead	stage iiia	male	white	not hispanic or latino	1938	not reported	-1	26965	not reported	not reported	not reported	m0	n0	t4	not reported	not reported	not reported	73	not reported	not reported	74	not reported	1001	1	-1	-1	iii	late	not reported	not reported	m0	t4	n0
TCGA-56-8308	lung squamous cell carcinoma- not otherwise specified (nos)	29139	517	217	-1	alive	stage iib	male	white	not hispanic or latino	1933	no	-1	29139	not reported	not reported	not reported	mx	n0	t3	not reported	not reported	not reported	79	not reported	not reported	63	not reported	517	0	517	0	ii	early	not reported	not reported	not reported	t3	n0
TCGA-60-2710	lung squamous cell carcinoma- not otherwise specified (nos)	24669	2024	1686	-1	alive	stage iia	female	white	not hispanic or latino	1938	not reported	-1	24669	not reported	not reported	not reported	m0	n1	t1	not reported	not reported	no	67	not reported	not reported	63	not reported	2024	0	-1	-1	ii	early	not reported	not reported	m0	t1	n1
TCGA-66-2790	lung squamous cell carcinoma- not otherwise specified (nos)	26420	699	699	-1	alive	stage iib	male	not reported	not reported	1936	not reported	-1	26420	not reported	not reported	not reported	m0	n1	t2	not reported	not reported	not reported	72	not reported	not reported	57	not reported	699	0	-1	-1	ii	early	not reported	not reported	m0	t2	n1
TCGA-NC-A5HI	lung squamous cell carcinoma- not otherwise specified (nos)	24981	1743	1135	-1	alive	stage ib	female	white	not reported	1941	yes	70	24981	not reported	not reported	not reported	m0	n0	t2	not reported	not reported	no	68	not reported	not reported	60	not reported	1743	0	70	1	i	early	not reported	not reported	m0	t2	n0
TCGA-77-A5G1	lung squamous cell carcinoma- not otherwise specified (nos)	27555	4026	3714	-1	alive	stage iiia	male	not reported	not reported	1927	yes	2197	27555	not reported	not reported	not reported	m0	n1	t3	not reported	not reported	no	75	not reported	not reported	53	not reported	4026	0	2197	1	iii	late	not reported	not reported	m0	t3	n1
TCGA-43-6647	lung squamous cell carcinoma- not otherwise specified (nos)	25378	757	183	-1	alive	stage iib	female	white	not hispanic or latino	1941	not reported	-1	25378	not reported	not reported	not reported	mx	n1	t2b	not reported	not reported	not reported	69	not reported	not reported	36	not reported	757	0	-1	-1	ii	early	not reported	not reported	not reported	t2	n1
TCGA-37-3783	lung squamous cell carcinoma- not otherwise specified (nos)	18728	122	122	-1	alive	stage iiia	male	white	not hispanic or latino	1955	not reported	-1	18728	not reported	not reported	not reported	m0	n2	t3	not reported	not reported	no	51	not reported	not reported	-1	not reported	122	0	-1	-1	iii	late	not reported	not reported	m0	t3	n2
TCGA-98-A538	lung squamous cell carcinoma- not otherwise specified (nos)	24698	826	120	-1	alive	stage iib	male	white	not hispanic or latino	1945	no	-1	24698	not reported	not reported	not reported	m0	n0	t3	not reported	not reported	no	67	not reported	not reported	35	no	826	0	826	0	ii	early	not reported	not reported	m0	t3	n0
TCGA-33-4589	lung squamous cell carcinoma- not otherwise specified (nos)	22754	-1	-1	47	dead	stage iib	female	white	hispanic or latino	1930	not reported	-1	22754	not reported	not reported	not reported	m0	n1	t2	not reported	not reported	not reported	62	not reported	not reported	45	not reported	47	1	-1	-1	ii	early	not reported	not reported	m0	t2	n1
TCGA-85-A4CN	lung squamous cell carcinoma- not otherwise specified (nos)	20490	1038	6	-1	alive	stage iib	female	white	not hispanic or latino	1956	no	-1	20490	not reported	not reported	not reported	m0	n1	t2b	not reported	not reported	no	56	not reported	not reported	-1	not reported	1038	0	1038	0	ii	early	not reported	not reported	m0	t2	n1
TCGA-96-7544	lung squamous cell carcinoma- not otherwise specified (nos)	30548	1517	1213	2160	dead	stage iib	male	white	not hispanic or latino	1925	not reported	-1	30548	not reported	not reported	not reported	mx	n1	t2	not reported	not reported	not reported	83	not reported	not reported	65	not reported	2160	1	-1	-1	ii	early	not reported	not reported	not reported	t2	n1
TCGA-60-2723	lung squamous cell carcinoma- not otherwise specified (nos)	27225	1092	693	-1	alive	stage ib	female	white	not hispanic or latino	1934	not reported	-1	27225	not reported	not reported	not reported	m0	n0	t2	not reported	not reported	no	74	not reported	not reported	58	not reported	1092	0	-1	-1	i	early	not reported	not reported	m0	t2	n0
TCGA-85-8355	lung squamous cell carcinoma- not otherwise specified (nos)	23227	61	20	-1	alive	stage ia	male	white	not hispanic or latino	1948	not reported	-1	23227	not reported	not reported	not reported	m0	n0	t1a	not reported	not reported	not reported	63	not reported	not reported	-1	not reported	61	0	-1	-1	i	early	not reported	not reported	m0	t1	n0
TCGA-85-8352	lung squamous cell carcinoma- not otherwise specified (nos)	24788	67	67	161	dead	stage iiia	male	white	not hispanic or latino	1944	not reported	-1	24788	not reported	not reported	not reported	m0	n1	t3	not reported	not reported	not reported	67	not reported	not reported	50	not reported	161	1	-1	-1	iii	late	not reported	not reported	m0	t3	n1
TCGA-66-2753	lung squamous cell carcinoma- not otherwise specified (nos)	25506	31	31	-1	alive	stage ib	male	not reported	not reported	1938	not reported	-1	25506	not reported	not reported	not reported	m0	n0	t2	not reported	not reported	not reported	69	not reported	not reported	162	not reported	31	0	-1	-1	i	early	not reported	not reported	m0	t2	n0
TCGA-XC-AA0X	lung squamous cell carcinoma- not otherwise specified (nos)	28211	-1	-1	6	dead	stage ia	female	black or african american	not hispanic or latino	1936	no	-1	28211	not reported	not reported	not reported	m0	n0	t1a	not reported	not reported	no	77	not reported	not reported	30	not reported	6	1	6	0	i	early	not reported	not reported	m0	t1	n0
TCGA-L3-A524	lung squamous cell carcinoma- not otherwise specified (nos)	16765	449	449	490	dead	stage iib	female	white	not hispanic or latino	1966	no	-1	16765	not reported	not reported	not reported	m0	n0	t3	not reported	not reported	no	45	not reported	not reported	25	not reported	490	1	490	0	ii	early	not reported	not reported	m0	t3	n0
TCGA-56-7731	lung squamous cell carcinoma- not otherwise specified (nos)	24441	0	0	3	dead	stage ib	female	white	not hispanic or latino	1945	not reported	-1	24441	not reported	not reported	not reported	mx	n0	t2a	not reported	not reported	not reported	66	not reported	not reported	100	not reported	3	1	-1	-1	i	early	not reported	not reported	not reported	t2	n0
TCGA-46-3766	lung squamous cell carcinoma- not otherwise specified (nos)	22707	370	365	-1	alive	stage ia	female	white	not hispanic or latino	1947	not reported	-1	22707	not reported	not reported	not reported	m0	n0	t1	not reported	not reported	no	62	not reported	not reported	-1	not reported	370	0	-1	-1	i	early	not reported	not reported	m0	t1	n0
TCGA-22-4594	lung squamous cell carcinoma- not otherwise specified (nos)	22115	1470	1470	1470	dead	stage iiia	female	not reported	not reported	1942	not reported	-1	22115	not reported	not reported	not reported	m0	n2	t3	not reported	not reported	no	60	not reported	not reported	40	not reported	1470	1	-1	-1	iii	late	not reported	not reported	m0	t3	n2
TCGA-33-A4WN	lung squamous cell carcinoma- not otherwise specified (nos)	22268	-1	-1	143	dead	stage ib	male	white	not hispanic or latino	1951	no	-1	22268	not reported	not reported	not reported	mx	n0	t2a	not reported	not reported	not reported	60	not reported	not reported	60	not reported	143	1	143	0	i	early	not reported	not reported	not reported	t2	n0
TCGA-56-8307	lung squamous cell carcinoma- not otherwise specified (nos)	20411	818	27	-1	alive	stage iib	female	white	not hispanic or latino	1957	no	-1	20411	not reported	not reported	not reported	m0	n0	t3	not reported	not reported	not reported	55	not reported	not reported	35	not reported	818	0	818	0	ii	early	not reported	not reported	m0	t3	n0
TCGA-85-8072	lung squamous cell carcinoma- not otherwise specified (nos)	22069	932	36	-1	alive	stage ia	male	white	not hispanic or latino	1951	not reported	-1	22069	not reported	not reported	not reported	m0	n0	t1a	not reported	not reported	no	60	not reported	not reported	15	not reported	932	0	-1	-1	i	early	not reported	not reported	m0	t1	n0
TCGA-77-6843	lung squamous cell carcinoma- not otherwise specified (nos)	27291	-1	-1	2224	dead	stage iia	male	white	not reported	1928	not reported	-1	27291	not reported	not reported	not reported	m0	n1	t1	not reported	not reported	no	74	not reported	not reported	30	not reported	2224	1	-1	-1	ii	early	not reported	not reported	m0	t1	n1
TCGA-85-8666	lung squamous cell carcinoma- not otherwise specified (nos)	23906	475	14	687	dead	stage ib	male	white	not hispanic or latino	1946	not reported	-1	23906	not reported	not reported	not reported	m0	n0	t2a	not reported	not reported	no	65	not reported	not reported	55	not reported	687	1	-1	-1	i	early	not reported	not reported	m0	t2	n0
TCGA-43-A475	lung squamous cell carcinoma- not otherwise specified (nos)	24680	296	206	-1	alive	stage iib	female	white	not hispanic or latino	1945	no	-1	24680	not reported	not reported	not reported	m0	n0	t3	not reported	not reported	not reported	67	not reported	not reported	100	not reported	296	0	296	0	ii	early	not reported	not reported	m0	t3	n0
TCGA-66-2795	lung squamous cell carcinoma- not otherwise specified (nos)	24897	122	122	-1	alive	stage iiib	male	not reported	not reported	1940	not reported	-1	24897	not reported	not reported	not reported	m0	n1	t4	not reported	not reported	not reported	68	not reported	not reported	86	not reported	122	0	-1	-1	iii	late	not reported	not reported	m0	t4	n1
TCGA-22-5485	lung squamous cell carcinoma- not otherwise specified (nos)	21488	916	916	916	dead	stage ia	female	white	not reported	1943	not reported	-1	21488	not reported	not reported	not reported	m0	n0	t1a	not reported	not reported	no	58	not reported	not reported	60	not reported	916	1	-1	-1	i	early	not reported	not reported	m0	t1	n0
TCGA-90-7769	lung squamous cell carcinoma- not otherwise specified (nos)	20276	358	18	-1	alive	stage iib	male	white	not hispanic or latino	1956	not reported	-1	20276	not reported	not reported	not reported	mx	n1	t2b	not reported	not reported	no	55	not reported	not reported	36	not reported	358	0	-1	-1	ii	early	not reported	not reported	not reported	t2	n1
TCGA-L3-A4E7	lung squamous cell carcinoma- not otherwise specified (nos)	26232	392	35	-1	alive	stage ib	male	white	not hispanic or latino	1941	no	-1	26232	not reported	not reported	not reported	m0	n0	t2a	not reported	not reported	no	71	not reported	not reported	25	not reported	392	0	392	0	i	early	not reported	not reported	m0	t2	n0
TCGA-77-8146	lung squamous cell carcinoma- not otherwise specified (nos)	26533	3189	2183	-1	alive	stage ia	male	not reported	not reported	1933	not reported	-1	26533	not reported	not reported	not reported	m0	n0	t1	not reported	not reported	no	72	not reported	not reported	75	not reported	3189	0	-1	-1	i	early	not reported	not reported	m0	t1	n0
TCGA-94-A5I4	lung squamous cell carcinoma- not otherwise specified (nos)	22299	491	155	-1	alive	stage iia	male	white	not hispanic or latino	1951	no	-1	22299	not reported	not reported	not reported	mx	n1	t2a	not reported	not reported	no	61	not reported	not reported	80	not reported	491	0	491	0	ii	early	not reported	not reported	not reported	t2	n1
TCGA-22-5479	lung squamous cell carcinoma- not otherwise specified (nos)	23563	1651	1651	2625	dead	stage ib	male	white	not reported	1940	not reported	-1	23563	not reported	not reported	not reported	m0	n0	t2	not reported	not reported	no	64	not reported	not reported	35	not reported	2625	1	-1	-1	i	early	not reported	not reported	m0	t2	n0
TCGA-98-A53H	lung squamous cell carcinoma- not otherwise specified (nos)	27928	618	169	-1	alive	stage ia	female	white	not hispanic or latino	1936	no	-1	27928	not reported	not reported	not reported	m0	n0	t1a	not reported	not reported	no	76	not reported	not reported	40	not reported	618	0	618	0	i	early	not reported	not reported	m0	t1	n0
TCGA-68-A59I	lung squamous cell carcinoma- not otherwise specified (nos)	26839	428	121	-1	alive	stage iiia	female	black or african american	not hispanic or latino	1939	no	-1	26839	not reported	not reported	not reported	m0	n1	t3	not reported	not reported	not reported	73	not reported	not reported	50	not reported	428	0	428	0	iii	late	not reported	not reported	m0	t3	n1
TCGA-43-7656	lung squamous cell carcinoma- not otherwise specified (nos)	25991	596	212	-1	alive	stage ia	male	white	not hispanic or latino	1940	not reported	-1	25991	not reported	not reported	not reported	mx	n0	t1b	not reported	not reported	not reported	71	not reported	not reported	45	not reported	596	0	-1	-1	i	early	not reported	not reported	not reported	t1	n0
TCGA-77-7463	lung squamous cell carcinoma- not otherwise specified (nos)	27520	-1	-1	1423	dead	stage ib	male	white	not reported	1926	not reported	-1	27520	not reported	not reported	not reported	m0	n0	t2	not reported	not reported	no	75	not reported	not reported	42	not reported	1423	1	-1	-1	i	early	not reported	not reported	m0	t2	n0
TCGA-56-8623	lung squamous cell carcinoma- not otherwise specified (nos)	26231	6	6	692	dead	stage ib	male	white	not hispanic or latino	1941	no	-1	26231	not reported	not reported	not reported	mx	n0	t2a	not reported	not reported	not reported	71	not reported	not reported	45	not reported	692	1	692	0	i	early	not reported	not reported	not reported	t2	n0
TCGA-85-A50M	lung squamous cell carcinoma- not otherwise specified (nos)	17429	382	19	826	dead	stage iia	male	asian	not hispanic or latino	1965	no	-1	17429	not reported	not reported	not reported	m0	n0	t2b	not reported	not reported	no	47	not reported	not reported	15	not reported	826	1	826	0	ii	early	not reported	not reported	m0	t2	n0
TCGA-98-A53A	lung squamous cell carcinoma- not otherwise specified (nos)	25662	274	274	552	dead	stage ib	male	black or african american	not hispanic or latino	1942	no	-1	25662	not reported	not reported	not reported	m0	n0	t2a	not reported	not reported	yes	70	not reported	fish	80	no	552	1	552	0	i	early	not reported	not reported	m0	t2	n0
TCGA-85-8354	lung squamous cell carcinoma- not otherwise specified (nos)	19692	995	61	-1	alive	stage ib	male	white	not hispanic or latino	1958	not reported	-1	19692	not reported	not reported	not reported	m0	n0	t2a	not reported	not reported	not reported	53	not reported	not reported	30	not reported	995	0	-1	-1	i	early	not reported	not reported	m0	t2	n0
TCGA-77-8154	lung squamous cell carcinoma- not otherwise specified (nos)	24640	1841	1092	-1	alive	stage ia	male	not reported	not reported	1941	no	-1	24640	not reported	not reported	not reported	m0	n0	t1	not reported	not reported	no	67	not reported	not reported	40	not reported	1841	0	1841	0	i	early	not reported	not reported	m0	t1	n0
TCGA-22-5471	lung squamous cell carcinoma- not otherwise specified (nos)	27749	1845	964	-1	alive	stage ib	male	white	not reported	1930	not reported	-1	27749	not reported	not reported	not reported	m0	n0	t2	not reported	not reported	no	75	not reported	not reported	50	not reported	1845	0	-1	-1	i	early	not reported	not reported	m0	t2	n0
TCGA-56-A49D	lung squamous cell carcinoma- not otherwise specified (nos)	24745	637	38	-1	alive	stage iiia	male	white	not reported	1945	no	-1	24745	not reported	not reported	not reported	mx	n2	t2a	not reported	not reported	not reported	67	not reported	not reported	53	not reported	637	0	637	0	iii	late	not reported	not reported	not reported	t2	n2
TCGA-92-7340	lung squamous cell carcinoma- not otherwise specified (nos)	16447	82	82	-1	alive	stage iia	female	white	not hispanic or latino	1966	not reported	-1	16447	not reported	not reported	not reported	mx	n1	t2a	not reported	not reported	no	45	not reported	not reported	15	not reported	82	0	-1	-1	ii	early	not reported	not reported	not reported	t2	n1
TCGA-63-A5MN	lung squamous cell carcinoma- not otherwise specified (nos)	28677	-1	-1	345	dead	stage iib	female	not reported	not reported	-1	yes	320	28677	not reported	not reported	not reported	m0	n0	t3	not reported	not reported	no	78	not reported	not reported	-1	not reported	345	1	320	1	ii	early	not reported	not reported	m0	t3	n0
TCGA-90-7766	lung squamous cell carcinoma- not otherwise specified (nos)	24354	289	47	-1	alive	stage ia	female	white	not hispanic or latino	1945	not reported	-1	24354	not reported	not reported	not reported	mx	n0	t1b	not reported	not reported	no	66	not reported	not reported	30	not reported	289	0	-1	-1	i	early	not reported	not reported	not reported	t1	n0
TCGA-56-8083	lung squamous cell carcinoma- not otherwise specified (nos)	20696	150	2	-1	alive	stage ib	male	white	not hispanic or latino	1955	no	-1	20696	not reported	not reported	not reported	mx	n0	t2a	not reported	not reported	not reported	56	not reported	not reported	30	not reported	150	0	150	0	i	early	not reported	not reported	not reported	t2	n0
TCGA-21-1076	lung squamous cell carcinoma- not otherwise specified (nos)	19863	1852	1852	-1	alive	stage ib	female	white	not hispanic or latino	1951	not reported	-1	19863	not reported	not reported	not reported	m0	n0	t2	not reported	not reported	not reported	54	not reported	not reported	35	not reported	1852	0	-1	-1	i	early	not reported	not reported	m0	t2	n0
TCGA-77-8133	lung squamous cell carcinoma- not otherwise specified (nos)	27139	-1	-1	1640	dead	stage iia	male	not reported	not reported	1927	not reported	-1	27139	not reported	not reported	not reported	m0	n1	t1	not reported	not reported	no	74	not reported	not reported	22	not reported	1640	1	-1	-1	ii	early	not reported	not reported	m0	t1	n1
TCGA-18-3414	lung squamous cell carcinoma- not otherwise specified (nos)	26938	-1	-1	716	dead	stage iv	male	asian	not hispanic or latino	1932	not reported	-1	26938	not reported	not reported	not reported	m1	n1	t4	not reported	not reported	not reported	73	not reported	not reported	25	not reported	716	1	-1	-1	iv	late	not reported	not reported	m1	t4	n1
TCGA-77-8145	lung squamous cell carcinoma- not otherwise specified (nos)	26707	-1	-1	212	dead	stage iiib	male	not reported	not reported	1927	yes	136	26707	not reported	not reported	not reported	m0	n1	t4	not reported	not reported	no	73	not reported	not reported	57	not reported	212	1	136	1	iii	late	not reported	not reported	m0	t4	n1
TCGA-56-7221	lung squamous cell carcinoma- not otherwise specified (nos)	28873	608	30	-1	alive	stage ib	male	white	not reported	1932	not reported	-1	28873	not reported	not reported	not reported	m0	n0	t2	not reported	not reported	not reported	79	not reported	not reported	25	not reported	608	0	-1	-1	i	early	not reported	not reported	m0	t2	n0
TCGA-39-5027	lung squamous cell carcinoma- not otherwise specified (nos)	26714	3108	1849	-1	alive	stage ib	male	white	not hispanic or latino	1933	not reported	-1	26714	not reported	not reported	not reported	m0	n0	t2a	not reported	not reported	no	73	not reported	not reported	40	not reported	3108	0	-1	-1	i	early	not reported	not reported	m0	t2	n0
TCGA-92-8065	lung squamous cell carcinoma- not otherwise specified (nos)	27049	70	70	-1	alive	stage iib	female	white	not hispanic or latino	1938	no	-1	27049	not reported	not reported	not reported	mx	n0	t3	not reported	not reported	no	74	not reported	not reported	14	not reported	70	0	70	0	ii	early	not reported	not reported	not reported	t3	n0
TCGA-33-4532	lung squamous cell carcinoma- not otherwise specified (nos)	25169	2524	2524	3924	dead	stage ib	male	white	not hispanic or latino	1933	not reported	-1	25169	not reported	not reported	not reported	m0	n0	t2	not reported	not reported	not reported	68	not reported	not reported	53	not reported	3924	1	-1	-1	i	early	not reported	not reported	m0	t2	n0
TCGA-77-8148	lung squamous cell carcinoma- not otherwise specified (nos)	24918	2023	293	-1	alive	stage iiia	male	not reported	not reported	1938	not reported	-1	24918	not reported	not reported	not reported	m0	n1	t3	not reported	not reported	no	68	not reported	not reported	60	not reported	2023	0	-1	-1	iii	late	not reported	not reported	m0	t3	n1
TCGA-34-5241	lung squamous cell carcinoma- not otherwise specified (nos)	29098	428	428	515	dead	stage ib	male	white	not hispanic or latino	1930	not reported	-1	29098	not reported	not reported	not reported	m0	n0	t2	not reported	not reported	no	79	not reported	not reported	25	no	515	1	-1	-1	i	early	not reported	not reported	m0	t2	n0
TCGA-21-5787	lung squamous cell carcinoma- not otherwise specified (nos)	24071	329	329	329	dead	stage iiia	male	black or african american	not hispanic or latino	1944	not reported	-1	24071	not reported	not reported	not reported	m0	n2	t2	not reported	not reported	not reported	65	not reported	not reported	100	not reported	329	1	-1	-1	iii	late	not reported	not reported	m0	t2	n2
TCGA-77-8138	lung squamous cell carcinoma- not otherwise specified (nos)	27225	-1	-1	539	dead	stage ib	male	not reported	not reported	1929	yes	289	27225	not reported	not reported	not reported	m0	n0	t2	not reported	not reported	no	74	not reported	not reported	54	not reported	539	1	289	1	i	early	not reported	not reported	m0	t2	n0
TCGA-37-A5EL	lung squamous cell carcinoma- not otherwise specified (nos)	19371	454	454	1143	dead	stage iib	male	white	not hispanic or latino	1958	no	-1	19371	not reported	not reported	not reported	m0	n0	t3	not reported	not reported	not reported	53	not reported	not reported	-1	not reported	1143	1	1143	0	ii	early	not reported	not reported	m0	t3	n0
TCGA-90-6837	lung squamous cell carcinoma- not otherwise specified (nos)	23511	758	42	-1	alive	stage iib	male	white	not hispanic or latino	1947	not reported	-1	23511	not reported	not reported	not reported	mx	n0	t3	not reported	not reported	not reported	64	not reported	not reported	40	not reported	758	0	-1	-1	ii	early	not reported	not reported	not reported	t3	n0
TCGA-18-3421	lung squamous cell carcinoma- not otherwise specified (nos)	23972	2645	1331	-1	alive	stage ib	male	white	not hispanic or latino	1942	not reported	-1	23972	not reported	not reported	not reported	m0	n0	t2	not reported	not reported	not reported	65	not reported	not reported	40	not reported	2645	0	-1	-1	i	early	not reported	not reported	m0	t2	n0
TCGA-85-8276	lung squamous cell carcinoma- not otherwise specified (nos)	22707	1050	13	-1	alive	stage iia	male	white	not hispanic or latino	1949	no	-1	22707	not reported	not reported	not reported	m0	n1	t1b	not reported	not reported	not reported	62	not reported	not reported	20	not reported	1050	0	1050	0	ii	early	not reported	not reported	m0	t1	n1
TCGA-33-AASL	lung squamous cell carcinoma- not otherwise specified (nos)	20940	-1	-1	826	dead	stage ia	female	black or african american	not hispanic or latino	1943	yes	149	20940	not reported	not reported	not reported	mx	n0	t1	not reported	not reported	not reported	57	not reported	not reported	60	not reported	826	1	149	1	i	early	not reported	not reported	not reported	t1	n0
TCGA-18-5592	lung squamous cell carcinoma- not otherwise specified (nos)	21020	1519	92	-1	alive	stage iib	male	not reported	not reported	1953	not reported	-1	21020	not reported	not reported	not reported	m0	n0	t3	not reported	not reported	not reported	57	not reported	not reported	40	not reported	1519	0	-1	-1	ii	early	not reported	not reported	m0	t3	n0
TCGA-63-6202	lung squamous cell carcinoma- not otherwise specified (nos)	-1	1602	-1	-1	alive	stage iia	male	not reported	not reported	-1	not reported	-1	-1	not reported	not reported	not reported	m0	n0	t2	not reported	not reported	not reported	-1	not reported	not reported	35	not reported	1602	0	-1	-1	ii	early	not reported	not reported	m0	t2	n0
TCGA-56-7579	lung squamous cell carcinoma- not otherwise specified (nos)	22632	44	44	951	dead	stage iiia	male	white	not hispanic or latino	1950	not reported	-1	22632	not reported	not reported	not reported	m0	n1	t3	not reported	not reported	not reported	61	not reported	not reported	2	not reported	951	1	-1	-1	iii	late	not reported	not reported	m0	t3	n1
TCGA-33-4582	lung squamous cell carcinoma- not otherwise specified (nos)	20402	-1	-1	3149	dead	stage ia	male	white	not hispanic or latino	1945	not reported	-1	20402	not reported	not reported	not reported	m0	n0	t1	not reported	not reported	not reported	55	not reported	not reported	86	not reported	3149	1	-1	-1	i	early	not reported	not reported	m0	t1	n0
TCGA-O2-A5IB	lung squamous cell carcinoma- not otherwise specified (nos)	26211	-1	-1	340	dead	stage iii	female	white	not hispanic or latino	1934	yes	253	26211	not reported	not reported	not reported	mx	n1	t3	not reported	not reported	no	71	not reported	not reported	2	not reported	340	1	253	1	iii	late	not reported	not reported	not reported	t3	n1
TCGA-98-A53B	lung squamous cell carcinoma- not otherwise specified (nos)	25390	-1	-1	61	dead	stage ib	male	white	not hispanic or latino	1943	no	-1	25390	not reported	not reported	not reported	m0	n0	t2a	not reported	not reported	no	69	not reported	not reported	40	not reported	61	1	61	0	i	early	not reported	not reported	m0	t2	n0
TCGA-NK-A5CX	lung squamous cell carcinoma- not otherwise specified (nos)	26879	111	111	-1	alive	stage iia	male	white	not hispanic or latino	1938	no	-1	26879	not reported	not reported	not reported	mx	n0	t2b	not reported	not reported	no	73	not reported	not reported	40	not reported	111	0	111	0	ii	early	not reported	not reported	not reported	t2	n0
TCGA-63-7020	lung squamous cell carcinoma- not otherwise specified (nos)	-1	2133	-1	-1	alive	stage ia	male	not reported	not reported	-1	not reported	-1	-1	not reported	not reported	not reported	m0	n0	t1	not reported	not reported	not reported	-1	not reported	not reported	50	not reported	2133	0	-1	-1	i	early	not reported	not reported	m0	t1	n0
TCGA-77-7465	lung squamous cell carcinoma- not otherwise specified (nos)	21548	990	479	-1	alive	stage iia	male	white	not reported	1952	not reported	-1	21548	not reported	not reported	not reported	m0	n1	t2a	not reported	not reported	no	58	not reported	not reported	120	not reported	990	0	-1	-1	ii	early	not reported	not reported	m0	t2	n1
TCGA-34-2604	lung squamous cell carcinoma- not otherwise specified (nos)	29827	958	958	958	dead	stage ib	female	white	not hispanic or latino	1918	not reported	-1	29827	not reported	not reported	not reported	m0	n0	t2	not reported	not reported	no	81	not reported	not reported	132	not reported	958	1	-1	-1	i	early	not reported	not reported	m0	t2	n0
TCGA-77-7138	lung squamous cell carcinoma- not otherwise specified (nos)	24594	-1	-1	340	dead	stage ib	male	not reported	not reported	1932	not reported	-1	24594	not reported	not reported	not reported	m0	n0	t2	not reported	not reported	no	67	not reported	not reported	20	not reported	340	1	-1	-1	i	early	not reported	not reported	m0	t2	n0
TCGA-43-2578	lung squamous cell carcinoma- not otherwise specified (nos)	21747	684	550	684	dead	stage ia	female	white	not hispanic or latino	1950	not reported	-1	21747	not reported	not reported	not reported	m0	n0	t1	not reported	not reported	not reported	59	not reported	not reported	64	not reported	684	1	-1	-1	i	early	not reported	not reported	m0	t1	n0
TCGA-85-A511	lung squamous cell carcinoma- not otherwise specified (nos)	22759	0	0	455	dead	stage iib	male	white	not hispanic or latino	1950	no	-1	22759	not reported	not reported	not reported	m0	n1	t2b	not reported	not reported	no	62	not reported	not reported	40	not reported	455	1	455	0	ii	early	not reported	not reported	m0	t2	n1
TCGA-43-A474	lung squamous cell carcinoma- not otherwise specified (nos)	24286	353	262	-1	alive	stage iia	male	white	not hispanic or latino	1946	no	-1	24286	not reported	not reported	not reported	m0	n0	t2b	not reported	not reported	not reported	66	not reported	not reported	47	not reported	353	0	353	0	ii	early	not reported	not reported	m0	t2	n0
TCGA-94-A5I6	lung squamous cell carcinoma- not otherwise specified (nos)	22949	538	185	-1	alive	stage iib	male	white	not hispanic or latino	1950	no	-1	22949	not reported	not reported	not reported	m0	n0	t3	not reported	not reported	no	62	not reported	not reported	80	not reported	538	0	538	0	ii	early	not reported	not reported	m0	t3	n0
TCGA-22-4613	lung squamous cell carcinoma- not otherwise specified (nos)	26722	358	358	358	dead	stage ia	female	white	not reported	1931	not reported	-1	26722	not reported	not reported	not reported	m0	n0	t1b	not reported	not reported	no	73	not reported	not reported	30	not reported	358	1	-1	-1	i	early	not reported	not reported	m0	t1	n0
TCGA-18-3410	lung squamous cell carcinoma- not otherwise specified (nos)	29827	-1	-1	146	dead	stage iib	male	not reported	not reported	1923	not reported	-1	29827	not reported	not reported	not reported	m0	n0	t3	not reported	not reported	not reported	81	not reported	not reported	-1	not reported	146	1	-1	-1	ii	early	not reported	not reported	m0	t3	n0
TCGA-63-7021	lung squamous cell carcinoma- not otherwise specified (nos)	-1	2142	-1	-1	alive	stage ia	male	not reported	not reported	-1	not reported	-1	-1	not reported	not reported	not reported	m0	n0	t1	not reported	not reported	not reported	-1	not reported	not reported	21	not reported	2142	0	-1	-1	i	early	not reported	not reported	m0	t1	n0
TCGA-85-7843	lung squamous cell carcinoma- not otherwise specified (nos)	18353	35	35	-1	alive	stage iia	male	white	not hispanic or latino	1961	not reported	-1	18353	not reported	not reported	not reported	m0	n1	t2a	not reported	not reported	not reported	50	not reported	not reported	35	not reported	35	0	-1	-1	ii	early	not reported	not reported	m0	t2	n1
TCGA-85-A4QQ	lung squamous cell carcinoma- not otherwise specified (nos)	25065	553	-2	927	dead	stage ib	male	white	not hispanic or latino	1944	not reported	-1	25065	not reported	not reported	not reported	m0	n0	t2a	not reported	not reported	no	68	not reported	not reported	50	not reported	927	1	-1	-1	i	early	not reported	not reported	m0	t2	n0
TCGA-98-A53I	lung squamous cell carcinoma- not otherwise specified (nos)	23502	565	99	-1	alive	stage iia	male	white	not hispanic or latino	1948	no	-1	23502	not reported	not reported	not reported	m0	n1	t2a	not reported	not reported	yes	64	not reported	fish	70	no	565	0	565	0	ii	early	not reported	not reported	m0	t2	n1
TCGA-56-8201	lung squamous cell carcinoma- not otherwise specified (nos)	27211	28	28	397	dead	stage iib	male	white	not hispanic or latino	1937	no	-1	27211	not reported	not reported	not reported	mx	n0	t3	not reported	not reported	not reported	74	not reported	not reported	-1	not reported	397	1	397	0	ii	early	not reported	not reported	not reported	t3	n0
TCGA-56-A62T	lung squamous cell carcinoma- not otherwise specified (nos)	28522	440	5	-1	alive	stage iia	male	black or african american	not hispanic or latino	1935	no	-1	28522	not reported	not reported	not reported	mx	n0	t2b	not reported	not reported	no	78	not reported	not reported	102	not reported	440	0	440	0	ii	early	not reported	not reported	not reported	t2	n0
TCGA-NC-A5HR	lung basaloid squamous cell carcinoma	27629	1244	623	-1	alive	stage iia	female	white	not reported	1936	no	-1	27629	not reported	not reported	not reported	m0	n1	t2a	not reported	not reported	no	75	not reported	not reported	35	not reported	1244	0	1244	0	ii	early	not reported	not reported	m0	t2	n1
TCGA-66-2781	lung squamous cell carcinoma- not otherwise specified (nos)	24471	121	121	-1	alive	stage ib	male	not reported	not reported	1940	not reported	-1	24471	not reported	not reported	not reported	m0	n0	t2	not reported	not reported	not reported	67	not reported	not reported	80	not reported	121	0	-1	-1	i	early	not reported	not reported	m0	t2	n0
TCGA-77-8143	lung squamous cell carcinoma- not otherwise specified (nos)	27772	-1	-1	803	dead	stage iiia	male	not reported	not reported	1928	not reported	-1	27772	not reported	not reported	not reported	m0	n2	t2	not reported	not reported	no	76	not reported	not reported	30	not reported	803	1	-1	-1	iii	late	not reported	not reported	m0	t2	n2
TCGA-NC-A5HF	lung squamous cell carcinoma- not otherwise specified (nos)	27038	-1	-1	138	dead	stage iiib	male	white	not reported	1934	yes	132	27038	not reported	not reported	not reported	mx	n0	t4	not reported	not reported	no	74	not reported	not reported	-1	not reported	138	1	132	1	iii	late	not reported	not reported	not reported	t4	n0
TCGA-77-7337	lung squamous cell carcinoma- not otherwise specified (nos)	24065	-1	-1	3253	dead	stage iib	male	white	not reported	1935	not reported	-1	24065	not reported	not reported	not reported	m0	n1	t2	not reported	not reported	no	65	not reported	not reported	79	not reported	3253	1	-1	-1	ii	early	not reported	not reported	m0	t2	n1
TCGA-58-8390	lung squamous cell carcinoma- not otherwise specified (nos)	25827	911	272	-1	alive	stage iia	male	white	not hispanic or latino	1940	no	-1	25827	not reported	not reported	not reported	m0	n0	t2b	not reported	not reported	no	70	not reported	not reported	120	not reported	911	0	911	0	ii	early	not reported	not reported	m0	t2	n0
TCGA-MF-A522	lung squamous cell carcinoma- not otherwise specified (nos)	20051	83	83	360	dead	stage ib	male	white	not reported	1958	no	-1	20051	not reported	not reported	not reported	mx	n0	t2a	not reported	not reported	not reported	54	not reported	not reported	45	not reported	360	1	360	0	i	early	not reported	not reported	not reported	t2	n0
TCGA-60-2722	lung squamous cell carcinoma- not otherwise specified (nos)	24267	908	733	-1	alive	stage iib	male	white	not hispanic or latino	1942	not reported	-1	24267	not reported	not reported	not reported	m0	n1	t2	not reported	not reported	no	66	not reported	not reported	90	not reported	908	0	-1	-1	ii	early	not reported	not reported	m0	t2	n1
TCGA-37-5819	lung squamous cell carcinoma- not otherwise specified (nos)	23726	103	103	-1	alive	stage iiia	male	white	not hispanic or latino	1946	not reported	-1	23726	not reported	not reported	not reported	m0	n2	t2	not reported	not reported	not reported	64	not reported	not reported	45	not reported	103	0	-1	-1	iii	late	not reported	not reported	m0	t2	n2
TCGA-60-2724	lung squamous cell carcinoma- not otherwise specified (nos)	17462	717	37	-1	alive	stage iiia	male	white	not hispanic or latino	1961	not reported	-1	17462	not reported	not reported	not reported	m0	n1	t3	not reported	not reported	no	47	not reported	not reported	60	not reported	717	0	-1	-1	iii	late	not reported	not reported	m0	t3	n1
TCGA-52-7812	lung squamous cell carcinoma- not otherwise specified (nos)	24887	-1	-1	835	dead	not reported	male	white	hispanic or latino	1941	not reported	-1	24887	not reported	not reported	not reported	m0	n2	t2	not reported	not reported	no	68	not reported	not reported	30	not reported	835	1	-1	-1	not reported	not reported	not reported	not reported	m0	t2	n2
TCGA-37-A5EN	lung squamous cell carcinoma- not otherwise specified (nos)	21600	660	356	-1	alive	stage iiib	male	white	not hispanic or latino	1952	no	-1	21600	not reported	not reported	not reported	m0	n2	t4	not reported	not reported	not reported	59	not reported	not reported	-1	not reported	660	0	660	0	iii	late	not reported	not reported	m0	t4	n2
TCGA-94-7033	lung squamous cell carcinoma- not otherwise specified (nos)	26948	640	87	-1	alive	stage ib	male	white	not hispanic or latino	1938	not reported	-1	26948	not reported	not reported	not reported	mx	n0	t2	not reported	not reported	not reported	73	not reported	not reported	30	not reported	640	0	-1	-1	i	early	not reported	not reported	not reported	t2	n0
TCGA-33-4547	lung squamous cell carcinoma- not otherwise specified (nos)	25056	2419	1311	-1	alive	stage ib	male	white	not hispanic or latino	1939	not reported	-1	25056	not reported	not reported	not reported	m0	n0	t2	not reported	not reported	not reported	68	not reported	not reported	40	not reported	2419	0	-1	-1	i	early	not reported	not reported	m0	t2	n0
TCGA-85-A513	lung squamous cell carcinoma- not otherwise specified (nos)	21967	910	24	-1	alive	stage ia	female	asian	not hispanic or latino	1952	not reported	-1	21967	not reported	not reported	not reported	m0	nx	t1a	not reported	not reported	no	60	not reported	not reported	-1	not reported	910	0	-1	-1	i	early	not reported	not reported	m0	t1	nx
TCGA-63-A5MW	lung squamous cell carcinoma- not otherwise specified (nos)	27892	1639	140	-1	alive	stage ib	male	not reported	not reported	-1	no	-1	27892	not reported	not reported	not reported	m0	n0	t2	not reported	not reported	not reported	76	not reported	not reported	60	not reported	1639	0	1639	0	i	early	not reported	not reported	m0	t2	n0
TCGA-56-7822	lung squamous cell carcinoma- not otherwise specified (nos)	27755	1	1	532	dead	stage iib	male	black or african american	not hispanic or latino	1936	not reported	-1	27755	not reported	not reported	not reported	m0	n1	t2b	not reported	not reported	not reported	75	not reported	not reported	60	not reported	532	1	-1	-1	ii	early	not reported	not reported	m0	t2	n1
TCGA-18-3411	lung squamous cell carcinoma- not otherwise specified (nos)	23370	3576	1415	-1	alive	stage iiia	female	not reported	not reported	1942	not reported	-1	23370	not reported	not reported	not reported	m0	n2	t2	not reported	not reported	not reported	63	not reported	not reported	50	not reported	3576	0	-1	-1	iii	late	not reported	not reported	m0	t2	n2
TCGA-33-4587	lung small cell squamous cell carcinoma	23062	-1	-1	1656	dead	stage ib	female	white	not hispanic or latino	1940	not reported	-1	23062	not reported	not reported	not reported	mx	n0	t2	not reported	not reported	not reported	63	not reported	not reported	-1	not reported	1656	1	-1	-1	i	early	not reported	not reported	not reported	t2	n0
TCGA-56-A4ZJ	lung squamous cell carcinoma- not otherwise specified (nos)	27516	640	25	-1	alive	stage ia	female	white	not hispanic or latino	1937	no	-1	27516	not reported	not reported	not reported	m0	n0	t1a	not reported	not reported	not reported	75	not reported	not reported	100	not reported	640	0	640	0	i	early	not reported	not reported	m0	t1	n0
TCGA-O2-A52N	lung squamous cell carcinoma- not otherwise specified (nos)	28520	-1	-1	1006	dead	stage i	male	white	not hispanic or latino	1927	no	-1	28520	not reported	not reported	not reported	mx	n0	t2	not reported	not reported	no	78	not reported	not reported	4	not reported	1006	1	1006	0	i	early	not reported	not reported	not reported	t2	n0
TCGA-63-5131	lung squamous cell carcinoma- not otherwise specified (nos)	-1	-1	-1	-1	dead	stage iib	male	not reported	not reported	-1	not reported	-1	-1	not reported	not reported	not reported	m0	n1	t2	not reported	not reported	no	-1	not reported	not reported	50	not reported	-1	-1	-1	-1	ii	early	not reported	not reported	m0	t2	n1
TCGA-66-2792	lung squamous cell carcinoma- not otherwise specified (nos)	21428	913	913	-1	alive	stage iib	male	not reported	not reported	1950	not reported	-1	21428	not reported	not reported	not reported	m0	n1	t2	not reported	not reported	not reported	58	not reported	not reported	10	not reported	913	0	-1	-1	ii	early	not reported	not reported	m0	t2	n1
TCGA-56-7730	lung squamous cell carcinoma- not otherwise specified (nos)	26699	6	6	198	dead	stage iia	male	white	not hispanic or latino	1938	not reported	-1	26699	not reported	not reported	not reported	m0	n0	t2b	not reported	not reported	not reported	73	not reported	not reported	-1	not reported	198	1	-1	-1	ii	early	not reported	not reported	m0	t2	n0
TCGA-39-5030	lung squamous cell carcinoma- not otherwise specified (nos)	29893	59	59	59	dead	stage iiia	female	asian	not reported	1925	not reported	-1	29893	not reported	not reported	not reported	m0	n2	t2a	not reported	not reported	no	81	not reported	not reported	8	no	59	1	-1	-1	iii	late	not reported	not reported	m0	t2	n2
TCGA-94-8491	lung squamous cell carcinoma- not otherwise specified (nos)	26698	810	31	-1	alive	stage iia	male	white	not reported	1939	no	-1	26698	not reported	not reported	not reported	m0	n1	t2a	not reported	not reported	no	73	not reported	not reported	56	not reported	810	0	810	0	ii	early	not reported	not reported	m0	t2	n1
TCGA-66-2789	lung squamous cell carcinoma- not otherwise specified (nos)	26753	-1	-1	123	dead	stage iiib	male	not reported	not reported	1935	not reported	-1	26753	not reported	not reported	not reported	m0	n3	t1	not reported	not reported	not reported	73	not reported	not reported	40	not reported	123	1	-1	-1	iii	late	not reported	not reported	m0	t1	n3
TCGA-33-A5GW	lung squamous cell carcinoma- not otherwise specified (nos)	24586	9	9	9	dead	stage iia	male	white	not hispanic or latino	1945	no	-1	24586	not reported	not reported	not reported	mx	n1	t1a	not reported	not reported	not reported	67	not reported	not reported	50	not reported	9	1	9	0	ii	early	not reported	not reported	not reported	t1	n1
TCGA-85-8353	lung squamous cell carcinoma- not otherwise specified (nos)	26549	54	54	94	dead	stage iiia	male	white	not hispanic or latino	1939	not reported	-1	26549	not reported	not reported	not reported	m0	n1	t3	not reported	not reported	not reported	72	not reported	not reported	50	not reported	94	1	-1	-1	iii	late	not reported	not reported	m0	t3	n1
TCGA-18-4086	lung squamous cell carcinoma- not otherwise specified (nos)	23731	-1	-1	85	dead	stage ib	male	not reported	not reported	1945	not reported	-1	23731	not reported	not reported	not reported	m0	n0	t2	not reported	not reported	not reported	64	not reported	not reported	30	not reported	85	1	-1	-1	i	early	not reported	not reported	m0	t2	n0
TCGA-77-8139	lung squamous cell carcinoma- not otherwise specified (nos)	26464	3166	3166	-1	alive	stage iib	male	not reported	not reported	1931	no	-1	26464	not reported	not reported	not reported	m0	n0	t3	not reported	not reported	no	72	not reported	not reported	52	not reported	3166	0	3166	0	ii	early	not reported	not reported	m0	t3	n0
TCGA-37-4130	lung squamous cell carcinoma- not otherwise specified (nos)	20652	247	247	-1	alive	stage ia	male	white	not hispanic or latino	1954	not reported	-1	20652	not reported	not reported	not reported	m0	n0	t1b	not reported	not reported	no	56	not reported	not reported	25	not reported	247	0	-1	-1	i	early	not reported	not reported	m0	t1	n0
TCGA-94-A4VJ	lung squamous cell carcinoma- not otherwise specified (nos)	25991	430	43	-1	alive	stage ia	female	white	not hispanic or latino	1941	no	-1	25991	not reported	not reported	not reported	m0	n0	t1b	not reported	not reported	no	71	not reported	not reported	37	not reported	430	0	430	0	i	early	not reported	not reported	m0	t1	n0
TCGA-33-4583	lung squamous cell carcinoma- not otherwise specified (nos)	26799	4299	4299	4601	dead	stage ia	male	white	not hispanic or latino	1926	not reported	-1	26799	not reported	not reported	not reported	m0	n0	t1	not reported	not reported	not reported	73	not reported	not reported	46	not reported	4601	1	-1	-1	i	early	not reported	not reported	m0	t1	n0
TCGA-56-6545	lung squamous cell carcinoma- not otherwise specified (nos)	28400	666	62	-1	alive	stage ib	female	white	not reported	1933	not reported	-1	28400	not reported	not reported	not reported	m0	n0	t2a	not reported	not reported	not reported	77	not reported	not reported	-1	not reported	666	0	-1	-1	i	early	not reported	not reported	m0	t2	n0
TCGA-6A-AB49	lung squamous cell carcinoma- not otherwise specified (nos)	-1	-1	-1	-1	dead	stage ib	female	black or african american	not hispanic or latino	1936	no	-1	-1	not reported	not reported	not reported	mx	n0	t2	not reported	not reported	not reported	73	not reported	not reported	50	not reported	-1	-1	-1	0	i	early	not reported	not reported	not reported	t2	n0
TCGA-85-6175	lung squamous cell carcinoma- not otherwise specified (nos)	23228	0	0	294	dead	stage iib	female	white	not hispanic or latino	1947	not reported	-1	23228	not reported	not reported	not reported	m0	n0	t3	not reported	not reported	no	63	not reported	not reported	-1	not reported	294	1	-1	-1	ii	early	not reported	not reported	m0	t3	n0
TCGA-21-1077	lung squamous cell carcinoma- not otherwise specified (nos)	23523	1058	1058	1058	dead	stage iib	male	white	not hispanic or latino	1942	not reported	-1	23523	not reported	not reported	not reported	m0	n1	t2	not reported	not reported	not reported	64	not reported	not reported	56	not reported	1058	1	-1	-1	ii	early	not reported	not reported	m0	t2	n1
TCGA-21-1078	lung squamous cell carcinoma- not otherwise specified (nos)	28125	469	474	474	dead	stage ib	male	white	not hispanic or latino	1929	not reported	-1	28125	not reported	not reported	not reported	m0	n0	t2	not reported	not reported	not reported	77	not reported	not reported	9	not reported	474	1	-1	-1	i	early	not reported	not reported	m0	t2	n0
TCGA-18-3419	lung squamous cell carcinoma- not otherwise specified (nos)	26813	2811	53	-1	alive	stage iib	male	not reported	not reported	1934	not reported	-1	26813	not reported	not reported	not reported	m0	n1	t2	not reported	not reported	not reported	73	not reported	not reported	50	not reported	2811	0	-1	-1	ii	early	not reported	not reported	m0	t2	n1
TCGA-77-8007	lung squamous cell carcinoma- not otherwise specified (nos)	25102	-1	-1	198	dead	stage iib	male	not reported	not reported	1933	not reported	-1	25102	not reported	not reported	not reported	m0	n1	t2	not reported	not reported	no	68	not reported	not reported	100	not reported	198	1	-1	-1	ii	early	not reported	not reported	m0	t2	n1
TCGA-NK-A5D1	lung basaloid squamous cell carcinoma	20909	511	511	-1	alive	stage iia	male	white	not hispanic or latino	1954	yes	159	20909	not reported	not reported	not reported	m0	n1	t2a	not reported	not reported	no	57	not reported	not reported	90	not reported	511	0	159	1	ii	early	not reported	not reported	m0	t2	n1
TCGA-66-2768	lung squamous cell carcinoma- not otherwise specified (nos)	20970	61	61	-1	alive	stage iib	male	not reported	not reported	1950	not reported	-1	20970	not reported	not reported	not reported	m0	n1	t2	not reported	not reported	not reported	57	not reported	not reported	-1	not reported	61	0	-1	-1	ii	early	not reported	not reported	m0	t2	n1
TCGA-90-7964	lung squamous cell carcinoma- not otherwise specified (nos)	25646	428	100	-1	alive	stage ib	male	white	not hispanic or latino	1941	not reported	-1	25646	not reported	not reported	not reported	mx	n0	t2a	not reported	not reported	no	70	not reported	not reported	180	not reported	428	0	-1	-1	i	early	not reported	not reported	not reported	t2	n0
TCGA-22-5473	lung squamous cell carcinoma- not otherwise specified (nos)	28826	-1	-1	1933	dead	not reported	male	white	not hispanic or latino	1927	not reported	-1	28826	not reported	not reported	not reported	m0	n0	t3	not reported	not reported	no	78	not reported	not reported	45	not reported	1933	1	-1	-1	not reported	not reported	not reported	not reported	m0	t3	n0
TCGA-77-6845	lung squamous cell carcinoma- not otherwise specified (nos)	25321	-1	-1	708	dead	stage iib	male	white	not reported	1934	not reported	-1	25321	not reported	not reported	not reported	m0	n0	t3	not reported	not reported	no	69	not reported	not reported	51	not reported	708	1	-1	-1	ii	early	not reported	not reported	m0	t3	n0
TCGA-39-5035	lung squamous cell carcinoma- not otherwise specified (nos)	26383	2080	474	-1	alive	stage ia	female	white	not hispanic or latino	1935	not reported	-1	26383	not reported	not reported	not reported	m0	n0	t1b	not reported	not reported	no	72	not reported	not reported	47	not reported	2080	0	-1	-1	i	early	not reported	not reported	m0	t1	n0
TCGA-34-2605	lung squamous cell carcinoma- not otherwise specified (nos)	27833	881	881	881	dead	stage iiib	male	white	not hispanic or latino	1930	not reported	-1	27833	not reported	not reported	not reported	m0	n1	t4	not reported	not reported	no	76	not reported	not reported	60	not reported	881	1	-1	-1	iii	late	not reported	not reported	m0	t4	n1
TCGA-79-5596	lung squamous cell carcinoma- not otherwise specified (nos)	-1	-1	-1	-1	alive	stage iiia	male	not reported	not reported	-1	not reported	-1	-1	not reported	not reported	not reported	m0	n1	t3	not reported	not reported	not reported	-1	not reported	not reported	40	not reported	-1	-1	-1	-1	iii	late	not reported	not reported	m0	t3	n1
TCGA-58-8391	lung squamous cell carcinoma- not otherwise specified (nos)	21102	2167	1342	-1	alive	stage iiia	female	white	not hispanic or latino	1949	no	-1	21102	not reported	not reported	not reported	m0	n2	t2	not reported	not reported	no	57	not reported	not reported	30	not reported	2167	0	2167	0	iii	late	not reported	not reported	m0	t2	n2
TCGA-58-A46N	lung basaloid squamous cell carcinoma	19050	910	540	-1	alive	stage ib	male	white	not hispanic or latino	1959	no	-1	19050	not reported	not reported	not reported	m0	n0	t2a	not reported	not reported	no	52	not reported	not reported	50	not reported	910	0	910	0	i	early	not reported	not reported	m0	t2	n0
TCGA-96-8169	lung squamous cell carcinoma- not otherwise specified (nos)	24674	557	189	-1	alive	stage ia	female	white	not hispanic or latino	1944	no	-1	24674	not reported	not reported	not reported	m0	n0	t1a	not reported	not reported	no	67	not reported	not reported	35	not reported	557	0	557	0	i	early	not reported	not reported	m0	t1	n0
TCGA-85-A4QR	lung squamous cell carcinoma- not otherwise specified (nos)	24756	600	25	-1	alive	stage ib	male	white	not hispanic or latino	1945	not reported	-1	24756	not reported	not reported	not reported	m0	n0	t2a	not reported	not reported	no	67	not reported	not reported	50	not reported	600	0	-1	-1	i	early	not reported	not reported	m0	t2	n0
TCGA-68-8251	lung squamous cell carcinoma- not otherwise specified (nos)	28739	406	96	-1	alive	stage ib	male	white	hispanic or latino	1934	no	-1	28739	not reported	not reported	not reported	m0	n0	t2a	not reported	not reported	not reported	78	not reported	not reported	52	not reported	406	0	406	0	i	early	not reported	not reported	m0	t2	n0
TCGA-56-A5DR	lung squamous cell carcinoma- not otherwise specified (nos)	29828	4	4	-1	alive	stage ia	male	white	not hispanic or latino	1931	no	-1	29828	not reported	not reported	not reported	mx	n0	t1a	not reported	not reported	no	81	not reported	not reported	-1	not reported	4	0	4	0	i	early	not reported	not reported	not reported	t1	n0
TCGA-66-2759	lung squamous cell carcinoma- not otherwise specified (nos)	24287	762	762	-1	alive	stage iiia	male	not reported	not reported	1941	not reported	-1	24287	not reported	not reported	not reported	m0	n2	t2	not reported	not reported	not reported	66	not reported	not reported	16	not reported	762	0	-1	-1	iii	late	not reported	not reported	m0	t2	n2
TCGA-66-2742	lung squamous cell carcinoma- not otherwise specified (nos)	25688	641	641	-1	alive	stage iv	male	not reported	not reported	1936	not reported	-1	25688	not reported	not reported	not reported	m1	n1	t2	not reported	not reported	not reported	70	not reported	not reported	44	not reported	641	0	-1	-1	iv	late	not reported	not reported	m1	t2	n1
TCGA-LA-A446	lung squamous cell carcinoma- not otherwise specified (nos)	25199	401	36	-1	alive	stage ia	male	white	not hispanic or latino	1944	no	-1	25199	not reported	not reported	not reported	mx	n0	t1b	not reported	not reported	no	68	not reported	not reported	26	not reported	401	0	401	0	i	early	not reported	not reported	not reported	t1	n0
TCGA-66-2754	lung squamous cell carcinoma- not otherwise specified (nos)	24471	61	61	-1	alive	stage iiia	male	not reported	not reported	1940	not reported	-1	24471	not reported	not reported	not reported	m0	n2	t2	not reported	not reported	not reported	67	not reported	not reported	40	not reported	61	0	-1	-1	iii	late	not reported	not reported	m0	t2	n2
TCGA-85-8288	lung squamous cell carcinoma- not otherwise specified (nos)	25629	54	54	402	dead	stage iia	male	white	not hispanic or latino	1941	no	-1	25629	not reported	not reported	not reported	m0	n1	t1b	not reported	not reported	not reported	70	not reported	not reported	50	not reported	402	1	402	0	ii	early	not reported	not reported	m0	t1	n1
TCGA-68-A59J	lung squamous cell carcinoma- not otherwise specified (nos)	27031	409	104	-1	alive	stage ib	female	white	not hispanic or latino	1938	no	-1	27031	not reported	not reported	not reported	mx	n0	t2a	not reported	not reported	not reported	74	not reported	not reported	45	not reported	409	0	409	0	i	early	not reported	not reported	not reported	t2	n0
TCGA-39-5019	lung squamous cell carcinoma- not otherwise specified (nos)	25756	3387	1361	-1	alive	stage ib	male	white	not hispanic or latino	1934	not reported	-1	25756	not reported	not reported	not reported	m0	n0	t2a	not reported	not reported	no	70	not reported	not reported	30	not reported	3387	0	-1	-1	i	early	not reported	not reported	m0	t2	n0
TCGA-56-A4BY	lung squamous cell carcinoma- not otherwise specified (nos)	24445	31	31	543	dead	stage ib	male	white	not hispanic or latino	1946	no	-1	24445	not reported	not reported	not reported	mx	n0	t2a	not reported	not reported	no	66	not reported	not reported	65	not reported	543	1	543	0	i	early	not reported	not reported	not reported	t2	n0
TCGA-33-6738	lung squamous cell carcinoma- not otherwise specified (nos)	29368	1927	822	-1	alive	stage iiia	male	white	not reported	1929	not reported	-1	29368	not reported	not reported	not reported	mx	n2	t1	not reported	not reported	not reported	80	not reported	not reported	50	not reported	1927	0	-1	-1	iii	late	not reported	not reported	not reported	t1	n2
TCGA-37-3792	lung squamous cell carcinoma- not otherwise specified (nos)	25502	12	12	-1	alive	stage ib	male	white	not hispanic or latino	1937	not reported	-1	25502	not reported	not reported	not reported	m0	n0	t2	not reported	not reported	no	69	not reported	not reported	-1	not reported	12	0	-1	-1	i	early	not reported	not reported	m0	t2	n0
TCGA-66-2794	lung squamous cell carcinoma- not otherwise specified (nos)	23710	1645	1645	-1	alive	stage iiib	male	not reported	not reported	1942	not reported	-1	23710	not reported	not reported	not reported	m0	n2	t4	not reported	not reported	not reported	64	not reported	not reported	100	not reported	1645	0	-1	-1	iii	late	not reported	not reported	m0	t4	n2
TCGA-56-5898	lung squamous cell carcinoma- not otherwise specified (nos)	25441	555	0	-1	alive	stage ia	male	white	not hispanic or latino	1941	not reported	-1	25441	not reported	not reported	not reported	m0	n0	t1b	not reported	not reported	not reported	69	not reported	not reported	-1	not reported	555	0	-1	-1	i	early	not reported	not reported	m0	t1	n0
TCGA-34-8454	lung squamous cell carcinoma- not otherwise specified (nos)	22913	1180	166	-1	alive	stage iiia	female	white	not hispanic or latino	1949	no	-1	22913	not reported	not reported	not reported	m0	n1	t3	not reported	not reported	not reported	62	not reported	not reported	90	not reported	1180	0	1180	0	iii	late	not reported	not reported	m0	t3	n1
TCGA-56-8625	lung squamous cell carcinoma- not otherwise specified (nos)	24188	63	63	315	dead	stage iiia	female	white	not hispanic or latino	1946	no	-1	24188	not reported	not reported	not reported	mx	n1	t3	not reported	not reported	not reported	66	not reported	not reported	-1	not reported	315	1	315	0	iii	late	not reported	not reported	not reported	t3	n1
TCGA-60-2713	lung squamous cell carcinoma- not otherwise specified (nos)	23630	1731	1456	-1	alive	stage ib	male	white	not hispanic or latino	1942	not reported	-1	23630	not reported	not reported	not reported	m0	n0	t2	not reported	not reported	no	64	not reported	not reported	110	not reported	1731	0	-1	-1	i	early	not reported	not reported	m0	t2	n0
TCGA-85-8664	lung squamous cell carcinoma- not otherwise specified (nos)	26954	434	3	550	dead	stage iib	male	white	not hispanic or latino	1938	not reported	-1	26954	not reported	not reported	not reported	m0	n1	t2b	not reported	not reported	not reported	73	not reported	not reported	60	not reported	550	1	-1	-1	ii	early	not reported	not reported	m0	t2	n1
TCGA-77-7140	lung squamous cell carcinoma- not otherwise specified (nos)	25303	-1	-1	632	dead	stage iib	female	white	not reported	1933	not reported	-1	25303	not reported	not reported	not reported	m0	n1	t2	not reported	not reported	no	69	not reported	not reported	-1	not reported	632	1	-1	-1	ii	early	not reported	not reported	m0	t2	n1
TCGA-21-1083	lung squamous cell carcinoma- not otherwise specified (nos)	27708	267	267	1315	dead	stage ia	male	white	not hispanic or latino	1922	not reported	-1	27708	not reported	not reported	not reported	m0	n0	t1	not reported	not reported	not reported	75	not reported	not reported	240	not reported	1315	1	-1	-1	i	early	not reported	not reported	m0	t1	n0
TCGA-77-8008	lung squamous cell carcinoma- not otherwise specified (nos)	24948	-1	-1	2639	dead	stage ib	male	not reported	not reported	1933	not reported	-1	24948	not reported	not reported	not reported	m0	n0	t2	not reported	not reported	no	68	not reported	not reported	61	not reported	2639	1	-1	-1	i	early	not reported	not reported	m0	t2	n0
TCGA-66-2785	lung squamous cell carcinoma- not otherwise specified (nos)	23772	60	60	-1	alive	stage ib	male	not reported	not reported	1943	not reported	-1	23772	not reported	not reported	not reported	m0	n0	t2	not reported	not reported	not reported	65	not reported	not reported	70	not reported	60	0	-1	-1	i	early	not reported	not reported	m0	t2	n0
TCGA-21-A5DI	lung squamous cell carcinoma- not otherwise specified (nos)	28374	979	979	-1	alive	stage ia	male	white	not hispanic or latino	1929	no	-1	28374	not reported	not reported	not reported	m0	n0	t1b	not reported	not reported	not reported	77	not reported	not reported	-1	not reported	979	0	979	0	i	early	not reported	not reported	m0	t1	n0
TCGA-18-3415	lung squamous cell carcinoma- not otherwise specified (nos)	28430	1810	1810	2803	dead	stage ib	male	not reported	not reported	1929	not reported	-1	28430	not reported	not reported	not reported	m0	n0	t2	not reported	not reported	not reported	77	not reported	not reported	30	not reported	2803	1	-1	-1	i	early	not reported	not reported	m0	t2	n0
TCGA-NC-A5HT	lung squamous cell carcinoma- not otherwise specified (nos)	25466	804	419	-1	alive	stage iiia	male	white	not reported	1943	yes	203	25466	not reported	not reported	not reported	m0	n1	t3	not reported	not reported	no	69	not reported	not reported	50	not reported	804	0	203	1	iii	late	not reported	not reported	m0	t3	n1
TCGA-39-5036	lung squamous cell carcinoma- not otherwise specified (nos)	26963	2165	1084	-1	alive	stage ib	male	white	not reported	1934	not reported	-1	26963	not reported	not reported	not reported	m0	n0	t2	not reported	not reported	no	73	not reported	not reported	63	not reported	2165	0	-1	-1	i	early	not reported	not reported	m0	t2	n0
TCGA-NC-A5HQ	lung squamous cell carcinoma- not otherwise specified (nos)	25781	-1	-1	448	dead	stage iiia	male	white	not reported	1941	no	-1	25781	not reported	not reported	not reported	m0	n2	t3	not reported	not reported	no	70	not reported	not reported	-1	not reported	448	1	448	0	iii	late	not reported	not reported	m0	t3	n2
TCGA-85-A50Z	lung squamous cell carcinoma- not otherwise specified (nos)	20941	493	0	-1	alive	stage iia	male	white	not hispanic or latino	1955	not reported	-1	20941	not reported	not reported	not reported	m0	n0	t2b	not reported	not reported	not reported	57	not reported	not reported	45	not reported	493	0	-1	-1	ii	early	not reported	not reported	m0	t2	n0
TCGA-77-A5G6	lung squamous cell carcinoma- not otherwise specified (nos)	24215	-1	-1	678	dead	stage iiia	male	not reported	not reported	1943	yes	392	24215	not reported	not reported	not reported	m0	n2	t2	not reported	not reported	no	66	not reported	not reported	74	not reported	678	1	392	1	iii	late	not reported	not reported	m0	t2	n2
TCGA-66-2767	lung squamous cell carcinoma- not otherwise specified (nos)	22888	61	61	-1	alive	stage iiib	male	not reported	not reported	1945	not reported	-1	22888	not reported	not reported	not reported	m0	n3	t2	not reported	not reported	not reported	62	not reported	not reported	43	not reported	61	0	-1	-1	iii	late	not reported	not reported	m0	t2	n3
TCGA-LA-A7SW	lung squamous cell carcinoma- not otherwise specified (nos)	26116	146	146	408	dead	stage iiia	male	black or african american	not hispanic or latino	1942	not reported	-1	26116	not reported	not reported	not reported	mx	n1	t3	not reported	not reported	no	71	not reported	not reported	37	not reported	408	1	-1	-1	iii	late	not reported	not reported	not reported	t3	n1
TCGA-33-4533	lung squamous cell carcinoma- not otherwise specified (nos)	28001	4068	3469	-1	alive	stage ib	female	black or african american	not hispanic or latino	1925	not reported	-1	28001	not reported	not reported	not reported	m0	n0	t2	not reported	not reported	not reported	76	not reported	not reported	50	not reported	4068	0	-1	-1	i	early	not reported	not reported	m0	t2	n0
TCGA-21-5786	lung squamous cell carcinoma- not otherwise specified (nos)	23649	1032	661	-1	alive	stage ib	male	white	not hispanic or latino	1945	not reported	-1	23649	not reported	not reported	not reported	m0	n0	t2	not reported	not reported	not reported	64	not reported	not reported	75	not reported	1032	0	-1	-1	i	early	not reported	not reported	m0	t2	n0
TCGA-56-8622	lung squamous cell carcinoma- not otherwise specified (nos)	24861	55	55	-1	alive	stage ib	male	white	not hispanic or latino	1944	no	-1	24861	not reported	not reported	not reported	m0	n0	t2a	not reported	not reported	not reported	68	not reported	not reported	40	not reported	55	0	55	0	i	early	not reported	not reported	m0	t2	n0
TCGA-66-2758	lung squamous cell carcinoma- not otherwise specified (nos)	26209	639	639	-1	alive	stage ib	male	not reported	not reported	1936	not reported	-1	26209	not reported	not reported	not reported	m0	n0	t2	not reported	not reported	not reported	71	not reported	not reported	56	not reported	639	0	-1	-1	i	early	not reported	not reported	m0	t2	n0
TCGA-85-8584	lung papillary squamous cell caricnoma	26081	0	0	383	dead	stage iia	male	white	not hispanic or latino	1941	not reported	-1	26081	not reported	not reported	not reported	m0	n1	t2a	not reported	not reported	no	71	not reported	not reported	50	not reported	383	1	-1	-1	ii	early	not reported	not reported	m0	t2	n1
TCGA-NC-A5HJ	lung squamous cell carcinoma- not otherwise specified (nos)	21730	-1	-1	418	dead	stage iib	male	white	not reported	1950	yes	328	21730	not reported	not reported	not reported	m0	n0	t3	not reported	not reported	no	59	not reported	not reported	78	not reported	418	1	328	1	ii	early	not reported	not reported	m0	t3	n0
TCGA-NC-A5HD	lung squamous cell carcinoma- not otherwise specified (nos)	28916	-1	-1	2	dead	stage iib	male	white	not reported	1929	no	-1	28916	not reported	not reported	not reported	m0	n0	t3	not reported	not reported	no	79	not reported	not reported	50	not reported	2	1	2	0	ii	early	not reported	not reported	m0	t3	n0
TCGA-51-6867	lung squamous cell carcinoma- not otherwise specified (nos)	26523	-1	-1	1856	dead	stage i	female	white	not hispanic or latino	1931	not reported	-1	26523	not reported	not reported	not reported	m0	n0	t1	not reported	not reported	not reported	72	not reported	not reported	40	not reported	1856	1	-1	-1	i	early	not reported	not reported	m0	t1	n0
TCGA-NC-A5HP	lung squamous cell carcinoma- not otherwise specified (nos)	25286	730	730	770	dead	stage iv	male	white	not reported	1942	yes	317	25286	not reported	not reported	not reported	m1b	n0	t2a	not reported	not reported	no	69	not reported	not reported	50	not reported	770	1	317	1	iv	late	not reported	not reported	m1	t2	n0
TCGA-46-3769	lung squamous cell carcinoma- not otherwise specified (nos)	20941	135	121	-1	alive	not reported	male	white	not hispanic or latino	1952	not reported	-1	20941	not reported	not reported	not reported	m0	n0	t4	not reported	not reported	no	57	not reported	not reported	-1	not reported	135	0	-1	-1	not reported	not reported	not reported	not reported	m0	t4	n0
TCGA-90-A4EE	lung squamous cell carcinoma- not otherwise specified (nos)	19676	688	331	-1	alive	stage iia	male	white	not hispanic or latino	1959	no	-1	19676	not reported	not reported	not reported	mx	n1	t2a	not reported	not reported	yes	53	other	not reported	68	yes	688	0	688	0	ii	early	not reported	not reported	not reported	t2	n1
TCGA-58-8387	lung squamous cell carcinoma- not otherwise specified (nos)	21952	-1	-1	403	dead	stage iia	male	white	not hispanic or latino	1950	no	-1	21952	not reported	not reported	not reported	m0	n0	t2b	not reported	not reported	no	60	not reported	not reported	40	not reported	403	1	403	0	ii	early	not reported	not reported	m0	t2	n0
TCGA-92-8064	lung squamous cell carcinoma- not otherwise specified (nos)	21417	160	160	-1	alive	not reported	male	white	not hispanic or latino	1953	no	-1	21417	not reported	not reported	not reported	mx	n0	t2b	not reported	not reported	no	58	not reported	not reported	30	not reported	160	0	160	0	not reported	not reported	not reported	not reported	not reported	t2	n0
TCGA-58-8388	lung basaloid squamous cell carcinoma	21949	378	378	412	dead	stage ib	male	white	not hispanic or latino	1950	no	-1	21949	not reported	not reported	not reported	m0	n0	t2a	not reported	not reported	no	60	not reported	not reported	80	not reported	412	1	412	0	i	early	not reported	not reported	m0	t2	n0
TCGA-22-0944	lung squamous cell carcinoma- not otherwise specified (nos)	22329	223	223	223	dead	stage ib	male	white	not hispanic or latino	1939	not reported	-1	22329	not reported	not reported	not reported	m0	n0	t2	not reported	not reported	no	61	not reported	not reported	38	not reported	223	1	-1	-1	i	early	not reported	not reported	m0	t2	n0
TCGA-90-7767	lung squamous cell carcinoma- not otherwise specified (nos)	20534	89	89	-1	alive	stage iib	male	white	not hispanic or latino	1955	not reported	-1	20534	not reported	not reported	not reported	mx	n1	t2b	not reported	not reported	no	56	not reported	not reported	25	not reported	89	0	-1	-1	ii	early	not reported	not reported	not reported	t2	n1
TCGA-33-AASI	lung squamous cell carcinoma- not otherwise specified (nos)	23965	-1	-1	1344	dead	stage iib	female	black or african american	not hispanic or latino	1943	no	-1	23965	not reported	not reported	not reported	mx	n1	t2	not reported	not reported	not reported	65	not reported	not reported	60	not reported	1344	1	1344	0	ii	early	not reported	not reported	not reported	t2	n1
TCGA-NK-A7XE	lung squamous cell carcinoma- not otherwise specified (nos)	24319	13	13	-1	alive	stage iiib	male	black or african american	not hispanic or latino	1947	no	-1	24319	not reported	not reported	not reported	m0	n2	t4	not reported	not reported	no	66	not reported	not reported	80	not reported	13	0	13	0	iii	late	not reported	not reported	m0	t4	n2
TCGA-18-4721	lung squamous cell carcinoma- not otherwise specified (nos)	27076	4694	2754	-1	alive	stage ia	male	white	not hispanic or latino	1928	not reported	-1	27076	not reported	not reported	not reported	m0	n0	t1	not reported	not reported	not reported	74	not reported	not reported	-1	not reported	4694	0	-1	-1	i	early	not reported	not reported	m0	t1	n0
TCGA-56-1622	lung squamous cell carcinoma- not otherwise specified (nos)	21371	-1	-1	881	dead	stage ib	male	white	not hispanic or latino	1949	not reported	-1	21371	not reported	not reported	not reported	m0	n0	t2	not reported	not reported	not reported	58	not reported	not reported	86	not reported	881	1	-1	-1	i	early	not reported	not reported	m0	t2	n0
TCGA-21-1075	lung squamous cell carcinoma- not otherwise specified (nos)	21093	2134	2134	-1	alive	stage iib	male	white	not hispanic or latino	1945	not reported	-1	21093	not reported	not reported	not reported	m0	n1	t2	not reported	not reported	not reported	57	not reported	not reported	74	not reported	2134	0	-1	-1	ii	early	not reported	not reported	m0	t2	n1
TCGA-22-4609	lung squamous cell carcinoma- not otherwise specified (nos)	29844	-1	-1	291	dead	stage ia	male	white	not reported	1922	not reported	-1	29844	not reported	not reported	not reported	m0	n0	t1	not reported	not reported	no	81	not reported	not reported	77	not reported	291	1	-1	-1	i	early	not reported	not reported	m0	t1	n0
TCGA-85-A4JC	lung squamous cell carcinoma- not otherwise specified (nos)	30942	455	-10	604	dead	stage iia	male	white	not hispanic or latino	1928	not reported	-1	30942	not reported	not reported	not reported	m0	n0	t2b	not reported	not reported	no	84	not reported	not reported	25	not reported	604	1	-1	-1	ii	early	not reported	not reported	m0	t2	n0
TCGA-98-8022	lung squamous cell carcinoma- not otherwise specified (nos)	22487	224	224	933	dead	stage ia	male	white	not hispanic or latino	1950	no	-1	22487	not reported	not reported	not reported	m0	n0	t1a	not reported	not reported	no	61	not reported	not reported	117	no	933	1	933	0	i	early	not reported	not reported	m0	t1	n0
TCGA-68-7757	lung squamous cell carcinoma- not otherwise specified (nos)	27272	211	211	-1	alive	stage ia	male	white	not hispanic or latino	1937	no	-1	27272	not reported	not reported	not reported	mx	n0	t1b	not reported	not reported	no	74	not reported	not reported	25	not reported	211	0	211	0	i	early	not reported	not reported	not reported	t1	n0
TCGA-18-3406	lung squamous cell carcinoma- not otherwise specified (nos)	24477	-1	-1	371	dead	stage ia	male	white	not hispanic or latino	1936	not reported	-1	24477	not reported	not reported	not reported	m0	n0	t1	not reported	not reported	not reported	67	not reported	not reported	200	not reported	371	1	-1	-1	i	early	not reported	not reported	m0	t1	n0
TCGA-60-2698	lung squamous cell carcinoma- not otherwise specified (nos)	22800	-1	-1	311	dead	stage iib	male	white	not reported	1931	not reported	-1	22800	not reported	not reported	not reported	m0	n1	t2	not reported	not reported	no	62	not reported	not reported	-1	not reported	311	1	-1	-1	ii	early	not reported	not reported	m0	t2	n1
TCGA-58-8392	lung squamous cell carcinoma- not otherwise specified (nos)	25710	-1	-1	501	dead	stage ib	male	white	not hispanic or latino	1940	yes	96	25710	not reported	not reported	not reported	m0	n0	t2a	not reported	not reported	no	70	not reported	not reported	80	not reported	501	1	96	1	i	early	not reported	not reported	m0	t2	n0
TCGA-51-4081	lung squamous cell carcinoma- not otherwise specified (nos)	20261	911	63	-1	alive	stage iib	male	white	not hispanic or latino	1954	not reported	-1	20261	not reported	not reported	not reported	m0	n1	t2a	not reported	not reported	no	55	not reported	not reported	80	not reported	911	0	-1	-1	ii	early	not reported	not reported	m0	t2	n1
TCGA-21-1080	lung squamous cell carcinoma- not otherwise specified (nos)	24253	3724	3724	-1	alive	stage ib	male	white	not hispanic or latino	1930	not reported	-1	24253	not reported	not reported	not reported	m0	n0	t2	not reported	not reported	not reported	66	not reported	not reported	100	not reported	3724	0	-1	-1	i	early	not reported	not reported	m0	t2	n0
TCGA-56-8304	lung squamous cell carcinoma- not otherwise specified (nos)	26803	106	106	-1	alive	stage ia	female	white	not reported	1938	no	-1	26803	not reported	not reported	not reported	mx	n0	t1b	not reported	not reported	not reported	73	not reported	not reported	58	not reported	106	0	106	0	i	early	not reported	not reported	not reported	t1	n0
TCGA-98-8021	lung squamous cell carcinoma- not otherwise specified (nos)	27738	937	413	-1	alive	stage ia	female	white	not hispanic or latino	1936	no	-1	27738	not reported	not reported	not reported	m0	n0	t1a	not reported	not reported	no	75	not reported	not reported	60	not reported	937	0	937	0	i	early	not reported	not reported	m0	t1	n0
TCGA-34-8455	lung squamous cell carcinoma- not otherwise specified (nos)	24624	-1	-1	123	dead	stage iv	male	white	not hispanic or latino	1944	no	-1	24624	not reported	not reported	not reported	m1a	n0	t4	not reported	not reported	not reported	67	not reported	not reported	50	not reported	123	1	123	0	iv	late	not reported	not reported	m1	t4	n0
TCGA-66-2793	lung squamous cell carcinoma- not otherwise specified (nos)	25111	-1	-1	306	dead	stage iiib	male	not reported	not reported	1940	not reported	-1	25111	not reported	not reported	not reported	m0	n1	t4	not reported	not reported	not reported	68	not reported	not reported	112	not reported	306	1	-1	-1	iii	late	not reported	not reported	m0	t4	n1
TCGA-52-7811	lung squamous cell carcinoma- not otherwise specified (nos)	24782	-1	-1	266	dead	stage ib	male	white	hispanic or latino	1942	not reported	-1	24782	not reported	not reported	not reported	m0	n0	t2	not reported	not reported	no	67	not reported	not reported	50	not reported	266	1	-1	-1	i	early	not reported	not reported	m0	t2	n0
TCGA-92-7341	lung squamous cell carcinoma- not otherwise specified (nos)	26134	106	106	-1	alive	stage ib	male	white	not hispanic or latino	1940	not reported	-1	26134	not reported	not reported	not reported	mx	n0	t2a	not reported	not reported	no	71	not reported	not reported	50	not reported	106	0	-1	-1	i	early	not reported	not reported	not reported	t2	n0
TCGA-21-1079	lung squamous cell carcinoma- not otherwise specified (nos)	26176	965	965	965	dead	stage iiia	male	white	not hispanic or latino	1924	not reported	-1	26176	not reported	not reported	not reported	m0	n0	t3	not reported	not reported	not reported	71	not reported	not reported	80	not reported	965	1	-1	-1	iii	late	not reported	not reported	m0	t3	n0
[truncated: 4 more rows]
