# Supplementary material for: Transcriptome Analysis of Human Endogenous Retroviruses at Locus-Specific Resolution in Non-Small Cell Lung Cancer
Source: Cancers (Basel). 2022 Sep 13;14(18):4433. doi: 10.3390/cancers14184433 (PMC9497127; doi:10.3390/cancers14184433)
Supplement: Supplementary file 1 [file cancers-14-04433-s001.zip › File_S4.xlsx]

## Sheet: LUAD
HERV	Avg_tumor	SD_tumor	Avg_normal	SD_normal	logFC	P.Value	adj.P.Val
HERVH_7q22.1b	16.4327	30.921	322.12	141.648	-4.27506	1.16566e-44	4.72209e-41
MER4_5p13.2b	54.7221	102.223	1251.96	665.089	-5.26468	3.28086e-44	6.64539e-41
HERVH_6p21.32	146.371	281.612	2336.18	1027.87	-5.12088	2.35726e-42	3.18308e-39
HERVL_Xq21.33d	25.5879	48.1373	326.991	138.361	-4.06013	2.95124e-40	2.98887e-37
HERVL_4q34.1c	66.8824	122.401	1616.76	1044.61	-5.09513	5.94772e-40	4.81884e-37
ERV316A3_10q26.12	91.5877	168.545	1031.23	483.092	-4.59706	3.86423e-37	2.609e-34
HML3_4q34.1a	37.8804	88.1014	971.212	672.922	-4.87013	3.1475e-36	1.8215e-33
HERVH_Xq22.2a	33.1749	35.9785	375.109	210.643	-3.50591	9.31693e-36	4.71786e-33
ERV316A3_8q23.1c	25.2088	58.0468	307.582	254.666	-3.88766	1.44042e-34	6.48348e-32
HML6_12q24.12a	1025.58	890.447	5286.04	1529.62	-2.75897	5.066e-34	2.05224e-31
MER4B_Xq21.33	62.0169	129.782	571.457	306.517	-4.22682	1.78324e-33	6.36921e-31
ERVLE_1p35.2b	16.1219	35.8784	182.803	117.314	-3.43979	1.88671e-33	6.36921e-31
HERVH_Xq21.33a	99.536	271.42	591.648	217.644	-4.24131	4.94159e-33	1.53988e-30
HERVH_8q24.23c	55.5521	110.442	475.206	224.081	-3.89524	6.54712e-33	1.89445e-30
HERVH_9p24.2a	87.1569	328.163	571.205	355.639	-4.25952	7.88843e-33	2.1304e-30
HERVK11_2q34a	93.8623	136.591	556.283	260.323	-2.92007	2.54367e-32	6.44026e-30
HERVH_12q21.2b	301.028	451.718	2093.94	659.34	-4.06829	4.19688e-32	1.00009e-29
HERVL_12q21.2b	367.212	585.265	2559.72	1106.73	-3.7035	1.03868e-31	2.33761e-29
MER101_1p35.2	22.188	39.5763	269.286	197.157	-3.55756	1.62339e-31	3.46125e-29
HML6_11p15.4	125.681	222.785	896.418	430.119	-3.91739	1.94804e-31	3.94575e-29
HERVI_16p13.13	238.244	186.538	2709.42	1752.59	-3.52076	3.32279e-31	6.40983e-29
HML3_3q13.11a	9.68147	18.898	178.062	129.957	-3.4138	4.25677e-31	7.83826e-29
HERVH_2q32.1c	48.6014	103.427	397.223	216.429	-3.75918	2.92111e-30	5.14497e-28
HERVH_21q22.2	16.5284	47.1926	204.075	138.202	-3.67436	3.24479e-30	5.47694e-28
ERVLE_15q25.1f	163.148	185.564	1313.71	793.014	-3.39112	6.18685e-30	1.00252e-27
HML3_4q34.1b	4.75727	12.1102	105.925	77.1696	-3.07226	2.57314e-29	4.00915e-27
HERVH_9q21.12	5.97664	15.997	138.851	162.846	-3.20631	6.71737e-29	1.00786e-26
ERVLB4_1q23.1a	50.9096	137.943	448.119	324.864	-3.92275	1.44709e-28	2.09364e-26
HERVL32_2q31.3	50.5776	69.9997	461.49	329.671	-3.54341	8.42525e-28	1.17692e-25
ERVL_22q12.3b	48.5152	43.7322	309.425	145.586	-2.67222	8.73612e-28	1.17967e-25
HERVP71A_12p13.33b	82.7429	137.057	975.002	1458.59	-3.78337	1.27104e-27	1.62508e-25
ERV316A3_6p25.1e	32.5954	47.3992	415.76	475.647	-3.5792	1.28369e-27	1.62508e-25
HERVL_4q32.1a	986.037	691.967	3764.31	1679.42	-2.03108	1.47452e-27	1.81009e-25
HERVL_12q21.2c	240.526	370.978	1887.23	1419.7	-3.59973	1.63456e-27	1.94753e-25
ERVLB4_8q24.3d	11133	7128.79	2164.51	1030.5	2.22392	1.95866e-27	2.26701e-25
HERVH_6q23.2b	183.233	268.196	1028.46	455.815	-3.59322	2.04708e-27	2.30353e-25
HERVL40_7q21.12b	616.746	495.966	3015.5	1265.08	-2.57989	2.14821e-27	2.35199e-25
HERVH_1q42.13c	216.29	522.476	833.923	319.684	-4.11876	2.59481e-27	2.7662e-25
LTR57_2q37.1	46.7962	63.5922	246.96	106.485	-3.05302	3.80302e-27	3.95026e-25
HERVIP10F_16p13.13	117.625	144.886	979.067	720.184	-3.37881	5.09737e-27	5.16237e-25
ERVLE_1p31.1k	15.0907	32.7641	168.17	129.607	-3.24934	7.92064e-27	7.82598e-25
HERVFRD_Xq21.33b	19.9806	42.6809	259.909	315.354	-3.51642	8.32738e-27	8.03195e-25
ERVLB4_17q24.3	629.824	860.488	16.3847	31.7645	4.16233	1.91965e-26	1.80849e-24
MER61_10q26.12	417.133	1878.22	784.562	394.416	-4.06605	1.10978e-25	1.02175e-23
ERV316A3_3q27.1a	84.0416	104.3	508.953	339.892	-2.95192	1.79893e-24	1.61944e-22
MER101_2q37.1	38.2339	72.3931	175.451	93.0865	-2.8857	1.53929e-23	1.35558e-21
HERVH_8q24.22a	19.3118	68.4772	195.965	157.321	-3.41148	2.48444e-23	2.14138e-21
HERVFRD_6p24.2	140.61	173.982	754.431	575.494	-2.61274	3.52621e-23	2.97597e-21
HERVH_13q31.1a	9.05632	25.3097	202.118	179.309	-3.45245	4.03241e-23	3.33373e-21
HERVL18_6q14.1	6528.64	8923.72	75.9072	137.638	5.90387	4.43794e-23	3.59562e-21
MER41_9q21.12	76.6391	110.943	472.2	332.712	-3.10615	8.71977e-23	6.92623e-21
HERVP71A_12p13.33a	41.5859	55.3592	391.975	417.417	-3.31341	4.354e-22	3.39194e-20
HERVW_6q24.2b	3.68496	7.36717	47.0316	37.3899	-2.0522	7.97401e-22	6.09485e-20
HERVH_6q23.2c	334.324	584.048	1549.48	920.75	-3.73209	9.79826e-22	7.35051e-20
MER41_2q31.2	26.0145	56.8359	142.488	82.7324	-2.8061	1.10169e-21	8.11446e-20
HERVIP10F_2q34	2.50199	8.25546	43.3342	32.7048	-2.11554	1.21901e-21	8.81823e-20
HERVH_11q13.2b	36.5124	62.2596	211.908	168.908	-3.00828	1.50043e-21	1.06636e-19
HERVH_6p22.3d	69.0707	201.967	355.956	206.825	-3.30555	1.74048e-21	1.21563e-19
ERV316A3_8p21.2b	4.45015	11.5141	69.5786	70.5763	-2.40608	3.40409e-21	2.33729e-19
HML3_16p13.3	650.567	508.104	1915.39	714.839	-1.83722	3.76324e-21	2.54081e-19
HUERSP2_12q21.1	384.264	803.17	6.11334	14.9135	3.64621	4.42596e-21	2.93928e-19
HERVH_16q22.1	23.6457	40.5818	422.905	380.421	-3.61568	7.84401e-21	5.12518e-19
ERVLB4_Xq21.33b	992.192	1854.97	3848.97	2716.55	-3.80835	1.92481e-20	1.23769e-18
HML3_13q12.11a	423.863	455.576	23.0391	21.6372	3.21775	2.29671e-20	1.45375e-18
HERVH_17p11.2	176.473	353.595	951.913	853.203	-3.68403	3.48341e-20	2.17097e-18
MER4_Xq21.33c	180.916	341.649	698.145	490.211	-3.09679	6.00636e-20	3.68663e-18
HERVH_9q22.33b	17.4029	64.174	72.5373	48.9084	-2.50702	7.49878e-20	4.53396e-18
HERVP71A_6p21.1a	57.7873	89.838	239.062	141.123	-2.7784	8.55926e-20	5.09905e-18
HML2_7q11.21	73.6252	70.9401	250.437	102.294	-2.06747	9.17265e-20	5.38528e-18
HERVL_4q34.1d	2.18156	6.41235	57.3748	56.9129	-2.21673	1.49539e-19	8.65405e-18
ERVLB4_12q21.1a	139.842	428.281	0.597469	2.67108	2.69992	1.81824e-19	1.03742e-17
LTR25_1q22	166.443	148.014	25.7837	29.0931	2.44274	1.92207e-19	1.08143e-17
HML5_Xq21.33	90.7766	146.691	327.529	210.348	-2.73199	2.85934e-19	1.57367e-17
HUERSP3_8q11.1	437.94	1303.14	5.14949	14.9618	3.40741	2.87465e-19	1.57367e-17
ERV316A3_14q13.3	3.40722	11.3111	39.295	32.0238	-1.95871	3.75938e-19	2.03057e-17
LTR25_2p13.3	114.521	80.6719	339.596	144.281	-1.6762	4.27806e-19	2.28032e-17
HERVH_3p26.3b	14.079	25.1127	94.006	72.6871	-2.47452	4.39188e-19	2.31059e-17
ERVLE_5q32	121.086	353.404	0.600307	3.25035	2.54524	5.01535e-19	2.60477e-17
PRIMA41_4q34.2	1.42971	5.42485	35.4079	32.5887	-1.91275	6.39928e-19	3.28145e-17
HUERSP3B_1p33a	525.784	1239.54	1561.79	903.524	-3.75204	1.4339e-18	7.26092e-17
HUERSP3B_Xq21.33	417.691	708.654	1212.91	498.868	-3.33473	1.59101e-18	7.95702e-17
HERVW_1p33c	41.3415	118.194	133.369	86.1591	-2.64166	1.93159e-18	9.54251e-17
ERV316A3_6p22.1i	342.658	650.803	954.041	526.768	-2.59654	2.14682e-18	1.0478e-16
ERVLB4_Xq21.33c	278.474	485.479	790.99	330.766	-3.14708	3.19704e-18	1.54181e-16
ERV316A3_19q13.2	193.994	194.174	955.382	808.954	-2.34945	3.36448e-18	1.60347e-16
HERVH_3q28a	147.852	551.944	364.855	191.788	-2.73608	3.81678e-18	1.77837e-16
MER61_13q14.2	110.415	108.408	380.413	231.275	-2.03202	3.81927e-18	1.77837e-16
HML2_1q22	6865.83	5526.91	1542.05	855.995	1.92985	4.06908e-18	1.87317e-16
HERVH_20q13.12c	129.543	166.384	454.794	237.346	-2.67354	4.26449e-18	1.94106e-16
HARLEQUIN_6p21.32	1.12374	4.18315	29.0815	28.4847	-1.68533	7.6023e-18	3.42188e-16
MER4_Xq21.33d	5.85464	22.7644	44.789	38.2415	-2.02644	7.75656e-18	3.45295e-16
HERVK11D_2q31.1	68.5468	134.102	306.867	229.771	-2.7712	9.10265e-18	3.98713e-16
HERV30_8q24.23	1.81043	5.60959	40.9225	46.9173	-1.91859	9.15337e-18	3.98713e-16
ERVLB4_15q25.3a	4.98849	10.9561	59.3175	63.5657	-2.08954	9.51508e-18	4.1006e-16
HERVH_6q23.2a	60.7636	72.35	313.793	229.554	-2.72485	1.27895e-17	5.4537e-16
MER61_16p12.3	22.6506	25.7856	132.579	108.602	-2.27955	1.56787e-17	6.61608e-16
ERV316A3_3q13.12c	132.25	141.987	378.674	154.936	-1.8179	2.17221e-17	9.07179e-16
HML2_3p12.3	87.8922	136.905	402.971	338.123	-2.74819	2.2523e-17	9.31028e-16
ERV316A3_1q42.12b	365.714	494.213	35.7361	29.2575	2.57962	2.30712e-17	9.44057e-16
ERV316A3_5q23.1b	14.0941	22.3042	72.781	55.9317	-1.99683	3.06562e-17	1.24188e-15
ERV316A3_10q23.33	1.39552	4.30011	32.318	32.7519	-1.73118	4.11442e-17	1.65025e-15
HERVL_3q25.32	34.047	48.4404	162.494	119.099	-2.37003	4.26908e-17	1.69549e-15
HERV30_3q25.2	2.2357	8.09223	45.4693	53.4047	-1.94402	4.65397e-17	1.83041e-15
ERVLE_5q12.3a	70.8249	64.1674	220.303	108.183	-1.87174	4.75956e-17	1.85394e-15
MER61_18q12.3a	139.403	213.16	4.79448	10.7283	2.59874	4.94325e-17	1.90715e-15
HERVH_19q13.32d	21.1577	34.4764	138.233	125.684	-2.49135	5.28429e-17	2.01949e-15
HERVH_7q11.21	7291.98	5930.93	1491.37	883.483	1.98051	5.72801e-17	2.16861e-15
HERVW_15q21.2	25.3264	37.7532	138.82	104.749	-2.38848	6.88966e-17	2.58426e-15
HUERSP1_15q22.31	24.8092	25.5175	92.492	54.7101	-1.91297	9.06248e-17	3.36808e-15
HERVL18_11p14.1	4.55926	19.4741	40.6476	39.5894	-1.88176	9.21156e-17	3.39237e-15
MER41_4p16.1b	1979.65	811.351	3877.72	1148.22	-1.03618	1.05237e-16	3.84066e-15
ERVLB4_10p14	20.1965	33.3911	83.412	67.2916	-2.10265	1.17929e-16	4.26544e-15
ERVLE_6p22.1a	117.465	175.887	5.69268	8.83457	2.40601	1.37981e-16	4.94657e-15
HERV4_11q21	366.613	1275.35	490.389	302.084	-2.50551	1.62454e-16	5.7728e-15
HML6_19p12e	1218.62	1280.93	2938.47	1195.81	-1.78506	1.9322e-16	6.80639e-15
ERVLB4_11p15.5c	402.313	344.469	1175.58	717.358	-1.82201	2.12342e-16	7.41548e-15
HERVH_15q25.3a	13.4384	27.949	82.0414	76.692	-2.23861	2.19743e-16	7.60836e-15
HERVE_1p36.12	8023.18	16342.3	119.214	132.414	4.47496	2.39228e-16	8.21282e-15
HUERSP1_7q21.12	129.694	164.882	998.614	1085.1	-3.08602	2.71014e-16	9.22586e-15
ERVLE_8q24.3h	840.277	775.195	196.56	98.5195	1.73812	2.90544e-16	9.80829e-15
HERVIP10FH_Xq24	180.449	261.167	545.027	280.701	-2.31288	3.57711e-16	1.19759e-14
HERVK11_22q11.21	69.5938	134.962	209.253	146.852	-2.06844	3.75277e-16	1.2461e-14
HERVFH21_Xq11.2a	142.998	179.277	13.9339	36.9037	2.563	3.90025e-16	1.28454e-14
MER101_7q36.1a	16335.1	7243.27	7624.24	2559.17	1.0408	4.10034e-16	1.33955e-14
LTR19_4q35.1	35.5938	36.6755	151.749	116.816	-2.00377	4.53514e-16	1.46166e-14
MER101_10q11.22d	14.2959	22.1394	71.0819	62.3908	-1.98372	4.54626e-16	1.46166e-14
ERVLE_8q13.2a	13.3657	21.2851	67.322	55.0498	-1.94016	5.19579e-16	1.65733e-14
ERVLE_4q24g	34.7242	42.2166	133.537	91.0676	-2.00102	5.73522e-16	1.81511e-14
ERVLE_16p12.1c	70.1968	89.1416	4.29695	10.3524	2.11651	6.19443e-16	1.94524e-14
ERV316A3_12q21.1	133.219	543.633	1.7319	7.24701	2.28105	7.10851e-16	2.21512e-14
HERVH_11q23.3b	183.787	267.19	492.345	283.053	-2.68539	7.55274e-16	2.33558e-14
MER4_Xq21.33a	380.59	863.438	1225.86	1101.79	-3.29538	1.16967e-15	3.58963e-14
HERVK11_1p33	26.1874	92.8154	71.8685	48.0934	-2.15342	1.33764e-15	4.07427e-14
HERVH_7q31.2	36.0661	83.8738	133.624	90.3166	-2.32871	1.5408e-15	4.65805e-14
ERV316A3_6q22.31b	2.59444	7.21585	33.2211	30.6776	-1.68454	1.60308e-15	4.81044e-14
ERVLB4_Xq21.33d	4.30311	9.59615	45.3137	45.0549	-1.8348	2.27207e-15	6.76777e-14
ERVLE_1q42.12a	155.334	174.531	25.6481	25.4027	2.09537	2.31332e-15	6.84033e-14
MER4_5p12b	340.724	513.315	34.6163	29.9362	2.43016	2.4363e-15	7.15177e-14
HML5_11q12.2	67.5599	179.907	208.27	187.564	-2.7843	2.99089e-15	8.71661e-14
HARLEQUIN_5q23.1	11.5065	14.5833	63.8842	49.9073	-1.84662	3.99206e-15	1.15513e-13
HERVE_17q11.2	2049.79	2573.2	4670.02	2105.93	-1.89349	4.75832e-15	1.36709e-13
HERVP71A_Xq24	1188.37	2098.01	27.875	27.886	3.59891	6.2459e-15	1.78184e-13
HML3_8q24.13	69.7445	126.029	3.02816	6.89961	2.03001	6.97552e-15	1.97017e-13
HERVFH21_1q23.1	118.956	204.155	552.313	558.663	-2.89494	7.00331e-15	1.97017e-13
ERVLB4_4q23b	206.286	100.329	415.37	151.386	-1.03497	7.1406e-15	1.99494e-13
HERVH_9q34.13	383.237	450.133	1001.28	508.641	-2.13726	9.46986e-15	2.62756e-13
HERVIP10F_22q13.2	44568.3	28057.3	17764.9	11203.1	1.29159	9.56209e-15	2.6351e-13
ERV316A3_12q24.13	214.6	179.572	636.632	425.153	-1.73112	1.39477e-14	3.81771e-13
HARLEQUIN_2q32.1	249.273	259.263	673.512	362.422	-1.8247	1.4837e-14	4.03387e-13
MER4B_3q25.33b	8.90212	14.1005	45.3397	32.2616	-1.72681	1.97842e-14	5.34305e-13
HERVFRD_14q11.2	1718.9	2447.05	3815.38	1667.56	-2.77548	2.28404e-14	6.12758e-13
ERV316A3_1q32.2a	775.735	1240.64	2381.22	1719.38	-2.79645	2.91358e-14	7.76507e-13
ERVLE_17q21.31	60.5388	105.959	3.57253	6.65509	1.85118	3.85487e-14	1.02066e-12
HERVL40_4q31.3a	72.5296	51.1711	178.836	85.2784	-1.30639	3.90222e-14	1.02649e-12
HERV9_4p14	45.4707	54.7366	125.364	68.7553	-1.82839	3.93386e-14	1.02813e-12
MER61_2q32.1b	3.93718	9.55168	35.9212	34.6672	-1.64717	4.0107e-14	1.0415e-12
MER34B_7q36.1	15.1239	21.8544	69.3493	53.7437	-1.83805	4.44494e-14	1.14691e-12
MER41_6q23.2	8.24762	17.274	57.4844	58.0465	-1.84026	4.62431e-14	1.18564e-12
ERVLB4_17q25.1	406.76	499.374	1303.54	1121.88	-1.85312	5.37825e-14	1.37027e-12
MER4_12q12a	37.8745	103.436	84.8389	56.5027	-2.02027	5.54395e-14	1.40366e-12
HERVL18_5q34	1258.73	2440.62	61.098	52.5762	3.09422	5.96545e-14	1.4961e-12
ERV316A3_1q25.2b	11.2663	22.6645	60.2412	53.7537	-1.91312	5.98291e-14	1.4961e-12
ERVLB4_15q21.2	195.438	186.245	481.213	278.725	-1.46017	6.14188e-14	1.52643e-12
HERVH_3p21.31a	170.983	197.998	457.502	339.133	-1.57292	6.18231e-14	1.52711e-12
ERV316A3_9q32a	25.031	37.8665	83.8154	46.2883	-1.8959	6.31069e-14	1.54937e-12
HERVL40_22q11.23	105.046	80.6788	240.957	95.6065	-1.32716	6.49078e-14	1.58398e-12
PABLA_7q32.1	193.054	317.174	4.26193	9.16657	2.54841	6.70827e-14	1.62726e-12
ERVLE_5p12b	26.5339	31.0192	95.044	68.0615	-1.72839	7.70885e-14	1.85884e-12
MER4B_12p13.31c	1756.47	2773.87	4911.25	4080.42	-2.06123	8.19162e-14	1.96356e-12
HML5_4q24	34.1542	24.6708	113.969	69.5631	-1.59496	8.28419e-14	1.97407e-12
MER4_10q23.31a	189.417	160.539	532.639	610.482	-1.55173	8.70937e-14	2.06325e-12
HERVL40_19q13.42	8.67789	14.4699	55.9875	57.8986	-1.79675	8.87854e-14	2.0911e-12
HERVL18_2q23.1	5124.98	13058.1	31.8241	79.9054	4.30692	9.0158e-14	2.11116e-12
HERVEA_19p12a	52.5346	78.4518	150.822	106.812	-2.11474	9.75505e-14	2.27113e-12
HERVL_3q25.1	26.393	47.2562	90.8554	70.9886	-1.99492	9.91213e-14	2.29452e-12
HML1_6q22.32	129.639	92.4823	473.203	307.139	-1.8712	1.03881e-13	2.39104e-12
HERVH_4q22.3a	298.72	392.713	755.514	365.471	-1.86876	1.19853e-13	2.74308e-12
HARLEQUIN_19p12b	66.6108	110.407	2.26757	5.37921	1.95175	1.21717e-13	2.77008e-12
HERVKC4_6p22.1	157.469	207.043	21.8814	20.7581	2.07017	1.33199e-13	3.01447e-12
ERVLB4_7p13	7.74683	17.4633	50.4823	47.8304	-1.81134	1.61105e-13	3.62576e-12
HERVL_Xq21.33a	50.6099	104.747	192.435	190.241	-2.36358	1.94154e-13	4.3454e-12
HERVW_5p14.3	73.4185	75.8685	12.0684	18.5224	1.8146	2.33156e-13	5.18317e-12
HML2_3p25.3	44.4679	70.1318	126.657	81.1919	-2.03568	2.34145e-13	5.18317e-12
MER4_Xq21.33b	37.0031	70.1287	130.4	120.106	-2.2404	2.55628e-13	5.62799e-12
HERVS71_7q33	872.624	2075.27	20.8905	43.6866	3.18243	2.77467e-13	6.05107e-12
ERVLE_3q28e	42.9705	54.2877	108.489	54.0612	-1.57598	2.77833e-13	6.05107e-12
MER101_18q21.1a	228.038	144.164	454.944	156.532	-1.15833	2.88622e-13	6.25245e-12
HERVE_12p13.31a	76.6238	95.9908	248.063	163.136	-2.08198	2.91523e-13	6.28171e-12
HERVL_1q32.1	123.282	175.222	19.2118	22.7552	1.98657	3.55851e-13	7.62726e-12
HERVH_3q11.1	87.6606	83.5026	236.99	97.6996	-1.84862	3.67557e-13	7.8367e-12
HERVH_6q25.2a	17.1686	27.1871	74.6734	66.7242	-1.7551	6.13016e-13	1.30017e-11
HML6_8q12.1	42.0968	124.715	138.861	134.478	-2.0992	7.42531e-13	1.56666e-11
HML6_6p22.2	81.0915	127.693	7.62999	14.8125	1.95635	7.78984e-13	1.63506e-11
LTR57_14q32.33a	193.931	293.592	8.61933	11.8645	2.36885	1.09063e-12	2.2774e-11
HUERSP1_15q23b	114.332	139.248	266.69	146.979	-1.82839	1.1507e-12	2.39051e-11
ERVLE_7q31.32g	40.6677	84.1052	175.382	207.729	-2.26264	1.29077e-12	2.66781e-11
MER4_13q12.12c	390.69	429.517	84.0261	69.1387	1.84059	1.3389e-12	2.75324e-11
MER41_22q12.3e	587.524	300.014	239.214	138.928	1.28823	1.50781e-12	3.08492e-11
HERVH_7q31.33c	4.27693	12.9753	34.1352	37.9308	-1.60145	1.51797e-12	3.0901e-11
MER4_Xq21.33e	0.661825	3.11743	37.7462	70.0622	-1.60535	1.62499e-12	3.29141e-11
ERVLB4_3q29b	87.7572	93.8995	256.384	191.645	-1.81161	1.91246e-12	3.83566e-11
HERVH_5p15.33	400.813	601.649	1105.36	923.364	-2.35619	1.91262e-12	3.83566e-11
MER61_6q24.1b	91.0109	114.345	278.371	267.517	-1.90164	2.16161e-12	4.31364e-11
ERVLE_7p21.3b	143.589	217.067	2.29514	7.92564	2.36867	2.32897e-12	4.62483e-11
MER41_16p12.3	2300.82	910.869	3873.9	1233.93	-0.780872	2.34401e-12	4.632e-11
MER4_11q21d	46.793	43.0021	150.506	105.671	-1.60836	2.72779e-12	5.36421e-11
HERVH_11p15.4a	8.72633	17.5168	40.2752	36.6304	-1.55602	3.24168e-12	6.34397e-11
HERVIP10FH_2q14.2	400.592	1134.39	2305.08	3711.38	-3.60014	3.33553e-12	6.49626e-11
HERVL40_11q13.4b	84.5342	65.5799	180.969	71.4259	-1.25428	3.89611e-12	7.55174e-11
HML5_18q21.2	356.877	1488.1	23.4934	54.5837	2.44642	4.05317e-12	7.81875e-11
MER4B_2p23.1	6.29092	12.6037	34.6112	38.8307	-1.48593	4.26856e-12	8.19523e-11
HERVFH21_Xq11.2b	389.771	532.496	40.8601	97.9494	2.6273	4.70369e-12	8.98804e-11
HERVH_1p32.3e	5.55327	15.7048	53.9775	69.7583	-1.80637	4.7442e-12	9.02289e-11
HERVE_10p11.21	460.505	443.256	991.068	458.866	-1.78758	4.76857e-12	9.02687e-11
LTR57_5p12b	103.72	87.5853	26.2374	22.3414	1.6104	5.17975e-12	9.75961e-11
HERVI_7q33c	923.205	2058.21	8.6996	17.7652	3.1057	5.28995e-12	9.92111e-11
HERVP71A_12p13.31b	933.536	1049.33	370.514	228.943	1.19478	6.07676e-12	1.13442e-10
HERVIP10F_1p35.2a	679.268	1657.56	8.16488	26.5342	2.96897	6.16592e-12	1.14579e-10
ERVLE_17p11.2c	1099.18	614.829	2082.83	802.284	-1.0174	6.77443e-12	1.25311e-10
ERVLE_15q25.1a	24.6103	24.8114	75.4798	49.3954	-1.50554	6.85003e-12	1.26134e-10
HERVL74_6p25.1	972.722	533.131	440.67	228.247	1.1065	6.97736e-12	1.27897e-10
HERVP71A_6p21.1b	65.1788	91.989	171.795	106.72	-2.05033	7.09572e-12	1.29481e-10
HERVH_3p22.3b	144.488	140.219	312.326	156.745	-1.36068	7.22296e-12	1.31054e-10
HERV9_Xq23b	466.53	1878.88	21.0177	42.2757	2.51305	7.24661e-12	1.31054e-10
HERVW_1p33b	15.016	52.3539	44.9696	38.9345	-1.73509	7.47552e-12	1.34593e-10
MER4_4q25b	62.5784	76.1116	344.417	389.353	-2.18655	7.76965e-12	1.39269e-10
ERVLE_15q21.2	105.12	130.411	10.5489	14.904	1.95113	8.25078e-12	1.47242e-10
HERVL_1p22.1b	847.6	911.624	1575.72	648.796	-1.14495	8.402e-12	1.49283e-10
HERVW_3p24.3	119.821	273.547	572.597	615.654	-2.99929	9.68117e-12	1.7126e-10
HUERSP3_2q24.2	103.088	136.227	324.826	259.018	-2.13295	1.00223e-11	1.76524e-10
HARLEQUIN_1q32.1	7287.32	6698.81	1543.36	1352.59	1.9397	1.05542e-11	1.85086e-10
HERVL18_1p12	202.182	315.311	17.3355	18.8556	2.25295	1.14602e-11	2.00108e-10
HERV3_7q34a	247.975	200.628	75.1043	56.6899	1.55291	1.15856e-11	2.01431e-10
HARLEQUIN_7q22.1	284.609	176.364	106.714	66.5804	1.39561	1.18928e-11	2.05888e-10
HERVH_13q13.3a	309.274	213.768	739.776	392.15	-1.34042	1.20724e-11	2.08108e-10
ERV316A3_1q25.3b	172.18	205.765	38.0424	28.6397	1.7125	1.22034e-11	2.09475e-10
HERVIP10F_9p11.2	582.875	1412.87	3.22821	12.034	2.88815	1.25604e-11	2.14693e-10
HML3_1q25.2	148.048	178.293	21.3191	40.9716	2.15692	1.27438e-11	2.16913e-10
MER4_10p12.33	1.59075	4.75546	21.8253	26.5216	-1.27554	1.30415e-11	2.21051e-10
HERVH_10q22.3b	59.2139	86.1039	142.734	88.6849	-1.79512	1.32059e-11	2.22905e-10
ERVLB4_2q32.3	234.925	268.888	440.705	152.069	-1.58028	1.36633e-11	2.29667e-10
MER101_1p22.2a	63.9196	54.0149	206.297	164.472	-1.60191	1.67101e-11	2.79722e-10
MER61_Xp11.4	2.01109	6.77085	23.1466	23.8297	-1.33337	1.67803e-11	2.7974e-10
ERVLE_7q34a	227.781	167.767	77.3226	46.8768	1.38385	1.76909e-11	2.93712e-10
HERVL_5q12.3	279.584	310.824	63.6481	52.2779	1.82018	1.82796e-11	3.02248e-10
ERVLB4_6q22.31a	1.17703	4.48235	19.5373	24.4234	-1.25462	1.9793e-11	3.25941e-10
MER41_9q31.1c	177.229	320.229	519.091	543.253	-2.22342	2.17561e-11	3.56817e-10
HERVH48_8q24.13	165.696	110.242	379.431	195.054	-1.30817	2.45424e-11	3.99453e-10
ERVLE_1p13.3b	11.5423	13.4072	58.2768	50.6426	-1.60945	2.45529e-11	3.99453e-10
HML3_12q13.11	388.08	2009.67	1.04839	5.1728	2.32869	2.63349e-11	4.2673e-10
HERVH_4q31.1a	36.1647	59.7708	204.637	224.855	-2.24864	2.81018e-11	4.53548e-10
LTR25_3p22.1	279.081	206.289	487.871	132.128	-1.08169	2.91711e-11	4.68937e-10
HERVL_13q33.3	196.296	450.631	343.489	333.547	-2.52275	2.96865e-11	4.75336e-10
HERVH_6p23	110.904	270.762	386.464	427.572	-2.73722	3.19419e-11	5.09435e-10
HERVH_13q14.2a	295.842	198.191	581.156	232.026	-1.10868	3.42925e-11	5.4478e-10
ERVLB4_14q23.3	75.8076	89.3275	11.1914	16.6668	1.77994	3.50713e-11	5.54976e-10
ERVLE_11q23.3d	7.74438	19.3863	38.466	41.1583	-1.51163	3.53076e-11	5.56541e-10
HERVIP10F_1p35.2b	1238.63	2737.06	19.4741	51.0628	3.24102	3.87273e-11	6.08079e-10
MER41_7p14.1a	0.593394	3.27037	17.847	23.7456	-1.22041	4.68278e-11	7.32431e-10
ERV316A3_9p13.3a	82.698	105.686	16.8889	19.3091	1.63243	5.80797e-11	9.04926e-10
HERVH_9q33.2a	5.50683	15.246	37.703	43.1849	-1.54209	5.99621e-11	9.30676e-10
HARLEQUIN_4p14b	14.2385	19.8068	51.9674	47.121	-1.44024	6.18531e-11	9.56363e-10
HERVL_12q13.13	220.021	677.363	13.7151	13.61	1.99326	6.23758e-11	9.60778e-10
ERVLE_6q22.31c	3.97897	7.56692	28.3203	28.2565	-1.3279	6.44722e-11	9.89307e-10
HML2_1q21.3	539.938	390.743	212.481	140.555	1.32392	6.73462e-11	1.02738e-09
ERV316A3_8q21.13h	4.06678	12.5897	25.0423	25.3845	-1.32435	6.74604e-11	1.02738e-09
HERV4_4q12	500.758	420.774	1143.9	872.986	-1.30494	7.26296e-11	1.09931e-09
ERVLE_18q11.2a	7.06431	14.7462	28.808	22.8019	-1.38382	7.27267e-11	1.09931e-09
HERVH_17p12	217.698	772.985	785.954	1100.72	-2.95318	7.68433e-11	1.15722e-09
HERVFRD_19q13.41	107.722	174.118	6.45443	12.9174	2.00039	8.48358e-11	1.27285e-09
HERVH_11q25a	42.2919	87.8117	1293.09	1489.06	-3.79354	8.58084e-11	1.28269e-09
MER41_9p13.3a	74.5247	127.803	164.866	115.035	-1.52867	9.22354e-11	1.3737e-09
ERV316A3_6p21.33b	56.4664	43.6868	166.801	106.204	-1.59271	1.02325e-10	1.51839e-09
ERV316A3_2q31.1b	58.261	81.3266	2.71458	5.6561	1.70298	1.049e-10	1.55091e-09
HERVE_19p12	3156.76	5416.77	4725.4	2404.87	-2.11799	1.06021e-10	1.56179e-09
ERV316A3_10q22.1a	37.2035	52.1881	112.783	98.8765	-1.80124	1.13381e-10	1.66415e-09
MER41_6p22.3	873.785	877.41	314.988	1137.15	2.0235	1.13804e-10	1.66434e-09
HERVL_13q12.12	4.3679	12.8103	32.5295	36.0955	-1.44733	1.20926e-10	1.76053e-09
HERVH_6q11.1a	19.8027	35.1755	55.0273	36.3626	-1.61236	1.21251e-10	1.76053e-09
HERVIP10F_1p36.33	155.545	144.698	33.2556	35.318	1.89181	1.22718e-10	1.77546e-09
MER4_8q24.3b	602.757	344.316	1016.68	323.455	-0.902546	1.2545e-10	1.80853e-09
HERVEA_5q22.2	1761.44	1779.92	304.175	617.861	2.3865	1.26438e-10	1.81631e-09
HERVL_9q22.32	619.285	1415.1	2.95733	8.44695	2.74437	1.46213e-10	2.09297e-09
HERVH_1p33	68.4054	80.5194	160.374	99.0099	-1.72577	1.47787e-10	2.10805e-09
HERVH_9p21.3a	207.552	572.637	8.7118	16.5406	2.14088	1.51982e-10	2.16028e-09
HERVH_3q13.31b	47.1092	84.3863	136.383	109.154	-1.75568	1.54271e-10	2.18514e-09
MER101_18q21.1b	1090.82	671.336	1797.87	498.171	-0.924044	1.63983e-10	2.31461e-09
ERV316A3_9q34.3b	351.215	823.655	590.531	447.511	-2.538	1.7577e-10	2.47238e-09
MER101_1p22.2b	39.5852	45.0995	94.6872	53.9801	-1.49035	1.82078e-10	2.55224e-09
ERVLE_14q12m	63.9702	102.934	7.04414	11.2455	1.64476	1.86376e-10	2.60348e-09
HERVH_2p16.2	4.48796	10.6513	28.769	30.199	-1.35143	1.93764e-10	2.68984e-09
HERVH_14q24.3b	43.6432	46.7268	120.974	87.8173	-1.58841	1.93887e-10	2.68984e-09
MER101_2q35a	1131.1	772.85	2086.61	873.991	-1.13291	1.98881e-10	2.74971e-09
HERVL_11q12.1c	103.919	114.421	221.28	111.326	-1.4168	2.00997e-10	2.76952e-09
HERV9_1p31.3	16.6614	24.2577	92.0901	110.921	-1.76732	2.08007e-10	2.85639e-09
HERVH_7q11.23a	180.205	119.376	437.457	251.027	-1.31631	2.10942e-10	2.88692e-09
HERVIP10FH_15q25.1	710.369	246.171	1096.37	297.601	-0.633234	2.14214e-10	2.92182e-09
PABLA_5q33.3	183.138	197.572	46.3184	45.1992	1.65995	2.2627e-10	3.07591e-09
MER41_22q12.3b	6.17475	12.1755	31.635	31.004	-1.33419	2.37014e-10	3.21118e-09
HERVL74_19p13.2b	43.0032	96.1931	94.6976	69.211	-1.53657	2.41953e-10	3.26717e-09
MER34B_6q14.2	37.1921	44.1415	95.2331	68.7907	-1.45775	2.43188e-10	3.27294e-09
MER61_1q24.3a	20.0548	29.3778	75.7004	75.551	-1.57075	2.55647e-10	3.42922e-09
ERV316A3_1p36.22a	69.168	196.001	240.389	329.624	-2.44658	2.68107e-10	3.58449e-09
ERVLB4_8p23.1k	52.8038	90.1246	3.40067	7.4509	1.60097	2.84019e-10	3.77613e-09
HERV3_19q13.33	90.6724	160.641	263.877	289.989	-1.88771	2.84305e-10	3.77613e-09
HML5_19p12e	22.6963	35.8117	85.3876	101.597	-1.71898	2.87972e-10	3.81233e-09
PRIMA41_10p15.3	83.7741	125.717	13.9231	25.5301	1.81545	3.15421e-10	4.16212e-09
ERV316A3_6p25.1b	234.627	102.358	118.554	60.0761	0.979728	3.30085e-10	4.32984e-09
HML2_22q11.23	47.8248	139.077	303.526	885.276	-2.30194	3.30269e-10	4.32984e-09
HERVE_4p16.1c	595.602	921.728	882.73	407.406	-2.2112	3.35106e-10	4.37907e-09
HERVH_19p13.2d	1373.27	957.066	2496.66	943.205	-0.984384	3.45441e-10	4.49962e-09
HERVH_7q21.3b	50.6133	81.0039	0.403719	3.07464	1.64747	3.79661e-10	4.91421e-09
HERVL40_14q13.1b	33.2452	41.5759	91.5929	57.2999	-1.53917	3.79695e-10	4.91421e-09
ERVLB4_5q12.3a	31.2391	31.1544	83.0319	49.379	-1.41299	3.91383e-10	5.04934e-09
HERVS71_19q13.12a	10383.7	11497.7	1743.32	1024.22	1.80884	4.32628e-10	5.56373e-09
HERVH_17q22b	67.2258	237.496	0	0	1.59152	4.43258e-10	5.6824e-09
ERV316A3_21q22.3e	466.208	291.113	221.669	143.691	1.16949	4.5888e-10	5.86411e-09
MER4B_2q31.1	5635.74	3919.55	2914.28	1983.72	0.963972	4.87597e-10	6.2115e-09
MER34B_7q11.23a	92.3783	86.6876	25.2002	24.752	1.54138	4.98419e-10	6.3274e-09
ERV316A3_12p12.3a	9.85429	14.5432	47.5881	42.1281	-1.49999	4.9982e-10	6.3274e-09
HERVH_5q23.2b	20.6865	28.7728	56.1113	34.7755	-1.48901	5.28733e-10	6.67258e-09
ERVLB4_12p13.2a	3.20957	7.11395	45.0792	66.3835	-1.50152	5.79218e-10	7.28699e-09
MER4_8q24.3e	33.4111	56.9451	1.9512	6.97121	1.35887	6.00219e-10	7.52782e-09
MER41_9q22.32	180.088	365.82	17.5907	22.5505	1.951	6.16069e-10	7.70276e-09
ERVLB4_7q36.1a	36.4419	40.7176	95.9487	69.8272	-1.53894	6.27049e-10	7.81592e-09
HERVW_3q25.1a	149.16	411.216	603.212	797.251	-2.9266	6.3317e-10	7.86801e-09
ERVLE_1p36.12	202.403	143.922	75.0857	55.1127	1.43384	7.01784e-10	8.69397e-09
ERVLE_1q23.1a	58.799	116.803	1.28376	3.93814	1.62322	7.05723e-10	8.71612e-09
ERVLB4_17q21.32	701.345	480.905	1393.86	736.14	-1.12307	7.48121e-10	9.21166e-09
HERVH_1p31.1e	43.5206	60.6874	136.374	127.696	-1.75694	7.62435e-10	9.33972e-09
HERVL_9q21.11a	1168.18	2652.97	17.5938	65.0243	3.00278	7.63132e-10	9.33972e-09
HERVL18_3p21.31a	967.122	1865.96	105.057	93.6875	2.27043	8.09289e-10	9.87479e-09
HERVH_6q24.2	29.6122	48.5379	158.86	183.436	-2.14121	8.40558e-10	1.02255e-08
HML3_16p13.13	102.478	63.2081	323.748	268.393	-1.45673	9.46401e-10	1.14787e-08
HERVH_5q23.2f	64.4366	187.542	130.02	137.578	-1.86735	1.05288e-09	1.2732e-08
MER4B_14q32.33d	45.0787	57.4107	6.15136	10.5369	1.46532	1.12512e-09	1.3565e-08
HERVL_1q25.2	15.0336	17.4535	53.8176	44.2994	-1.41974	1.13381e-09	1.36293e-08
HERVH_7p14.3d	245.913	154.364	105.343	64.7531	1.16493	1.17755e-09	1.41131e-08
HML6_1p13.3	4.77942	14.095	36.2891	48.0464	-1.42964	1.18282e-09	1.41345e-08
HML1_15q21.2	151.802	307.367	2.96838	7.81241	2.01082	1.18672e-09	1.41395e-08
MER61_2q35	51.3636	51.7161	145.646	157.968	-1.5256	1.20151e-09	1.42737e-08
HERVFH19_9q34.11	80.2044	159.178	10.2266	17.0827	1.65936	1.21937e-09	1.44435e-08
MER4_14q32.33a	1996.66	2733.31	155.097	105.881	2.37137	1.29936e-09	1.53461e-08
PRIMA41_7p14.1b	4.05288	9.58543	19.5457	16.9141	-1.15643	1.30529e-09	1.53713e-08
ERV316A3_9q34.2b	61.7625	65.4477	12.0131	16.2357	1.55347	1.3423e-09	1.57613e-08
HERVEA_19q13.33	188.767	149.049	946.287	1266.35	-1.78537	1.36732e-09	1.60088e-08
HERVK11_18q21.1	26.7561	83.4509	111.058	156.237	-1.9604	1.38268e-09	1.61419e-08
ERVLE_11q13.5a	80.7586	173.256	296.509	346.407	-1.90057	1.4532e-09	1.69165e-08
HERVH_3q26.1i	43.4206	102.068	157.433	214.152	-2.05813	1.66172e-09	1.92883e-08
MER4B_3q26.31	90.4257	234.975	302.933	400.883	-2.51342	1.68663e-09	1.95216e-08
ERVLE_2p14b	118.861	131.45	28.7458	46.1775	1.6522	1.73886e-09	2.00687e-08
HERVL40_7q21.12a	5.57738	10.5407	27.1187	26.8006	-1.25145	1.76918e-09	2.03607e-08
HERVL_4p16.3a	94.6763	71.9786	185.513	97.2481	-1.11762	1.84307e-09	2.11509e-08
HERVS71_18q21.1	47.4527	91.9507	2.22908	7.86863	1.51154	1.93113e-09	2.20989e-08
HERVH_11q13.2c	8.93749	17.5512	43.5071	37.9169	-1.49581	1.98623e-09	2.26654e-08
HML3_3p22.2	638.688	389.85	324.284	92.639	0.802337	2.02625e-09	2.30572e-08
HML6_2q14.3	12.8008	46.6484	39.7778	37.5073	-1.52621	2.08618e-09	2.36328e-08
HML3_3q22.1	645.767	492.095	313.663	135.082	0.90013	2.09191e-09	2.36328e-08
ERV316A3_15q25.1b	56.7473	44.3084	17.3018	17.7978	1.30069	2.09434e-09	2.36328e-08
MER4_8q24.3c	97.9517	53.5329	187.761	82.1305	-0.98322	2.15728e-09	2.42754e-08
PABLA_2p25.1	331.614	373.997	70.5824	50.8296	1.67609	2.17605e-09	2.44187e-08
MER4_2q14.1b	109.457	111.61	33.3475	39.9066	1.44388	2.18884e-09	2.44944e-08
HERVH_12p13.31d	18.063	26.119	61.5292	59.8322	-1.4655	2.24594e-09	2.50642e-08
ERV316A3_7p22.3	37.9562	45.0775	4.65291	11.2854	1.44874	2.33226e-09	2.5956e-08
HERVL_18q21.2a	98.628	63.2937	181.439	59.0408	-1.01402	2.37043e-09	2.63085e-08
ERVL_16p12.3	58.7925	72.9505	145.874	110.542	-1.51016	2.49735e-09	2.76414e-08
HERVIP10FH_9p13.3	18.3773	29.3512	68.3861	62.9716	-1.5389	2.64974e-09	2.92482e-08
HUERSP3B_2q35	10.0049	16.4351	39.0692	37.7514	-1.34517	2.6711e-09	2.94039e-08
MER4_5p12a	339.801	667.609	43.1891	34.7205	1.9305	2.79839e-09	3.07216e-08
ERVLE_1q23.2b	534.553	256.535	812.934	192.273	-0.70054	2.81418e-09	3.08114e-08
HUERSP3_7q31.1	65.5971	64.4453	156.41	109.547	-1.44824	2.93162e-09	3.20108e-08
ERVLE_14q21.3e	82.0033	65.0009	31.3301	28.0414	1.23484	2.94203e-09	3.20381e-08
HERVI_16q22.2	10.2359	14.4078	76.3308	139.414	-1.55237	3.56298e-09	3.86961e-08
MER101_1p31.3	36.3348	49.4602	75.5761	45.4406	-1.42178	4.07582e-09	4.41474e-08
ERVLB4_13q34b	1.25709	4.54791	16.0531	19.2325	-1.08274	4.19632e-09	4.53314e-08
HERVL_1p22.2d	34.3258	33.2783	80.4996	48.2012	-1.29714	4.27564e-09	4.60655e-08
HERVIP10F_1p35.2c	419.069	885.945	11.1106	24.7823	2.4273	4.30533e-09	4.62624e-08
HERVL40_6q14.1	29.0601	46.5689	1.42039	4.79926	1.3063	4.37037e-09	4.6837e-08
PRIMA4_Xp11.22	9.30452	14.1275	30.1391	25.9067	-1.17279	4.39119e-09	4.69222e-08
MER4_3p25.1a	1.17337	4.65871	16.0695	19.0314	-1.07777	4.40149e-09	4.69222e-08
LTR57_18q21.1	37.1937	33.0766	77.8309	39.0774	-1.17583	4.43149e-09	4.7118e-08
MER101_7q22.1a	115.924	111.563	40.7117	27.12	1.20797	4.49135e-09	4.76295e-08
ERV316A3_18q22.3e	263.964	158.85	122.627	73.6321	1.18744	4.5995e-09	4.8649e-08
HERVE_5q14.3c	483.567	421.219	229.781	81.1221	0.86176	4.94955e-09	5.22151e-08
MER61_10q21.3	288.344	248.961	73.809	50.4103	1.61739	4.9879e-09	5.24831e-08
HERVH_8p11.23	39.1129	59.115	92.4784	68.0388	-1.585	5.0465e-09	5.29621e-08
ERVLE_11q23.3c	309.411	240.153	704.691	544.1	-1.35407	5.16481e-09	5.40637e-08
HERVL_2q34b	2.7045	8.65683	19.2471	21.6654	-1.10602	5.40479e-09	5.64299e-08
ERVLE_9q32a	4.4247	9.74877	23.8049	24.1721	-1.1949	5.81734e-09	6.05811e-08
HML1_12q13.11	2.46214	11.3905	14.9697	15.9187	-1.05119	5.91473e-09	6.14374e-08
ERV316A3_4q31.23b	7.79349	12.8191	33.5025	34.0098	-1.2944	6.28478e-09	6.51142e-08
HERVE_11q13.2b	11028.4	9419.07	18578.1	6601.88	-1.37006	6.85623e-09	7.08535e-08
ERV316A3_2q32.1i	2.05857	5.418	20.6522	26.5593	-1.12741	7.25343e-09	7.47676e-08
HERVL_12q12b	60.684	91.6498	14.7058	20.0093	1.37459	7.33955e-09	7.54632e-08
ERV316A3_7q31.1c	9043.86	3933.61	5554.58	3533.3	0.829067	7.6095e-09	7.80407e-08
ERVLE_16p11.2b	271.947	306.668	85.9902	63.1892	1.45526	7.773e-09	7.95162e-08
LTR57_22q11.21	44.3068	54.1195	9.88066	14.6773	1.29808	7.9821e-09	8.14127e-08
MER4_6p22.3d	90.2762	90.6989	236.89	218.273	-1.47705	7.99858e-09	8.14127e-08
HERVH_1q24.2	253.317	282.987	60.191	78.7066	1.88402	8.07344e-09	8.19687e-08
PRIMA41_8q24.3	405.313	406.485	110.249	46.8124	1.32528	8.13195e-09	8.23563e-08
HERVEA_3q25.32	403.261	694.997	558.45	233.512	-1.47128	8.22961e-09	8.31376e-08
ERV316A3_5p13.3e	58.0201	45.3208	19.9417	19.7843	1.28991	8.38297e-09	8.44762e-08
HERVH_19p13.3a	7.84421	35.0222	26.7081	28.5846	-1.29567	8.57718e-09	8.62187e-08
MER101_2p16.1	9.16496	14.8162	31.0362	27.7268	-1.22643	8.80397e-09	8.82794e-08
HUERSP1_9q22.33	73.1254	89.0163	18.615	22.7923	1.49006	9.19428e-09	9.19655e-08
ERVLE_2p13.2a	195.078	132.764	335.883	140.791	-0.941579	9.52553e-09	9.50441e-08
HERVH_2q33.2	43.2624	53.1298	97.2756	68.604	-1.52246	9.74425e-09	9.69876e-08
HERV3_7q11.21	28377.4	26816.7	9740.6	4915.49	1.13981	1.02312e-08	1.01585e-07
HML6_12p11.21	19.1347	22.986	3.0426	5.7413	1.02464	1.03082e-08	1.02099e-07
ERV316A3_1p31.3f	50.9536	43.3032	113.743	75.7431	-1.21947	1.09039e-08	1.07735e-07
ERVLE_7q31.32f	24.6607	68.1765	76.9887	97.7852	-1.67293	1.17504e-08	1.15818e-07
ERVLE_8p22a	30.1026	32.42	63.8854	36.2107	-1.29891	1.18904e-08	1.16913e-07
ERVLE_11q24.2a	10.3971	15.1121	36.286	33.2896	-1.2456	1.25648e-08	1.23245e-07
HERVH_19p13.3c	25.3331	36.3138	2.28708	6.02377	1.19329	1.27103e-08	1.24084e-07
HERVL_Xq21.33b	22.1868	35.1044	82.6429	107.479	-1.59549	1.27116e-08	1.24084e-07
HERVH_9p13.3a	47.997	46.7814	112.148	83.8507	-1.40598	1.38421e-08	1.34795e-07
MER4_6q14.2	63.8732	43.2515	122.001	53.4235	-1.0592	1.40644e-08	1.3663e-07
HERVL_21q21.3i	53.7746	49.2281	105.838	52.5839	-1.19835	1.442e-08	1.3975e-07
ERVLE_1p22.3a	68.9748	45.9932	139.608	76.6079	-1.0733	1.51881e-08	1.46843e-07
HERVE_11q13.4c	4124.47	3821.2	7395.06	4110.25	-1.31158	1.53621e-08	1.48171e-07
PABLB_12p11.21	19.0114	26.3309	2.05387	6.8977	1.11803	1.86516e-08	1.79472e-07
HERVFH21_7q11.21	47.3739	76.3863	2.98781	9.02432	1.45064	1.87355e-08	1.79852e-07
ERV316A3_3q13.31c	0.912349	3.58747	10.9386	11.9958	-0.900455	1.98584e-08	1.90181e-07
HERVL18_3q25.31	27.2017	34.9889	3.34629	7.5072	1.21292	2.16166e-08	2.0653e-07
PABLA_11q12.1b	764.138	393.364	419.296	230.391	0.849039	2.38467e-08	2.27302e-07
ERVLB4_8p21.1c	26.5365	39.1419	2.25299	5.3602	1.21431	2.42515e-08	2.30617e-07
ERV316A3_13q13.3c	97.4905	226.773	3.24812	7.63269	1.64598	2.45431e-08	2.32843e-07
PRIMA4_1q24.3	29.8277	42.9353	2.17744	6.57838	1.26809	2.60112e-08	2.46195e-07
ERVLE_2q37.3h	5.49415	11.2215	28.3957	40.4372	-1.19294	2.66292e-08	2.51457e-07
HERVW_3p11.1	24.6344	72.1522	55.1827	53.8192	-1.46724	2.86435e-08	2.69848e-07
HML3_7q36.3	8.52994	24.545	58.5574	96.3861	-1.4857	2.94067e-08	2.76395e-07
HERVH_12q21.2a	136.256	146.474	34.5083	39.8078	1.61612	3.0586e-08	2.86815e-07
MER61_6q14.1f	61.4381	59.1103	16.8484	22.1299	1.37674	3.08159e-08	2.88303e-07
ERVLB4_4q21.1a	13.8588	16.6646	1.66011	5.09297	0.963085	3.13812e-08	2.92915e-07
HERV9_7p14.2	51.3018	53.1327	108.334	72.6533	-1.32556	3.16203e-08	2.94175e-07
HERVFRD_6q22.31	4.57804	10.0445	18.7758	18.6987	-1.00672	3.16614e-08	2.94175e-07
ERVLE_18q21.1b	59.9498	144.93	3.86867	9.3431	1.44403	3.20303e-08	2.96922e-07
HERVL18_Xq24	9.51193	12.893	37.2513	51.2792	-1.18119	3.23992e-08	2.99656e-07
HERVIP10F_2p12	22.6407	35.0457	0	0	1.19725	3.46371e-08	3.19624e-07
HERVH_3p21.31e	455.475	721.494	699.16	350.66	-1.53753	3.55206e-08	3.27032e-07
MER61_4p15.2	24.7123	52.6164	0.210674	1.14682	1.16257	3.89652e-08	3.57932e-07
HERVH_19q13.2a	160.324	243.265	437.432	444.699	-1.87243	4.25837e-08	3.90286e-07
ERV316A3_2q22.3c	175.058	1024.38	1.93107	11.7287	1.53065	4.5514e-08	4.16202e-07
HUERSP1_11p15.4b	133.522	130.254	242.86	129.119	-1.23651	4.59413e-08	4.19163e-07
MER4B_9p13.3	68.5269	53.3253	142.784	84.1945	-1.16212	4.8583e-08	4.42269e-07
HERVEA_Xp11.22	66.2387	219.536	133.097	171.925	-1.58958	5.04006e-08	4.57787e-07
HERVEA_12q21.1	134.291	720.54	7.53668	14.5729	1.44247	5.19641e-08	4.70932e-07
HERVH_1p35.2	1.54916	5.64703	19.5099	25.7609	-1.09148	5.21772e-08	4.71574e-07
ERV316A3_16p12.1	34.7054	62.2652	3.86031	8.53418	1.21832	5.22678e-08	4.71574e-07
HML5_12q21.32	52.7984	52.9421	118.488	93.4647	-1.28701	5.57374e-08	5.01761e-07
HUERSP3_7q11.21a	261.348	620.651	11.6331	18.0632	1.99831	5.64893e-08	5.07401e-07
HERVFRD_21q22.3	44.2877	57.0678	89.3424	53.6031	-1.28614	5.98639e-08	5.36524e-07
HERVL18_15q21.3	150.004	505.672	175.664	161.472	-1.87348	6.17763e-08	5.52441e-07
ERVLE_5p12a	4.88935	9.21413	21.0439	21.8375	-1.04658	6.29569e-08	5.61759e-07
LTR46_11q21	53.7765	94.8948	5.97269	8.72592	1.38261	6.57117e-08	5.85051e-07
HERVL18_4q21.23	71.415	174.641	0.881681	4.19407	1.5149	6.77541e-08	6.01912e-07
HML5_Xp21.3	6.46484	39.8944	22.2328	28.3006	-1.17392	6.90306e-08	6.1191e-07
ERV316A3_11q23.3f	9.70702	13.2065	28.9213	22.88	-1.06142	6.93285e-08	6.13209e-07
PABLA_6q27a	25.0255	35.2312	61.0805	49.5989	-1.37101	7.01059e-08	6.18734e-07
HERVH_2q35b	70.0147	242.259	78.5611	66.1822	-1.76297	7.0565e-08	6.21432e-07
LTR25_7q36.1	27.7188	31.6726	73.9186	63.7574	-1.28086	7.0725e-08	6.2149e-07
HERVH_1q41f	4828.31	9392.9	102.119	155.793	3.40346	7.19928e-08	6.31262e-07
HML3_3q26.1a	20.2704	67.4593	61.4573	93.2652	-1.53575	7.24182e-08	6.3362e-07
MER41_12q12	23.3011	34.7036	3.64062	7.49292	1.09495	7.4503e-08	6.50457e-07
HERVH_1q41h	24.3157	71.0471	73.3719	95.0812	-1.66515	7.56666e-08	6.59195e-07
ERV316A3_8q13.3a	4036.59	3224.99	1955.7	1266.56	0.930062	8.36501e-08	7.27181e-07
ERVLB4_6q16.1d	670.301	323.948	971.297	264.578	-0.640632	8.5496e-08	7.41636e-07
HML5_1q42.12	115.727	85.0897	41.8996	33.0368	1.29366	8.77797e-08	7.5982e-07
HERVH_20q13.12b	8.76663	59.1709	33.977	77.5101	-1.26892	8.84177e-08	7.6291e-07
HERVL66_5q15	81.7915	100.686	247.411	303.436	-1.59201	8.85134e-08	7.6291e-07
PABLB_7q11.21	54.8403	77.9403	6.88952	17.1632	1.45228	9.3212e-08	8.01703e-07
ERV316A3_21q22.3b	1593.24	1840.55	2703.58	1728.25	-1.45369	9.45962e-08	8.11884e-07
HML2_7q22.2	3.17328	12.8651	24.057	30.3172	-1.16108	9.50963e-08	8.13167e-07
HERVH_9q22.32	26.596	40.9465	2.25611	6.41959	1.17007	9.51471e-08	8.13167e-07
HERVW_6p23	29.0387	31.3645	7.52882	13.3021	1.16106	9.60071e-08	8.18789e-07
HERVL_1q31.2c	13.8886	20.8803	56.3405	63.7905	-1.39289	9.62705e-08	8.19311e-07
HERVH_19q13.32b	37.7465	60.1233	6.24261	16.5702	1.27626	1.01021e-07	8.57934e-07
MER41_9q22.31	41.2482	86.9317	1.41292	5.46133	1.2948	1.02465e-07	8.66835e-07
ERVLE_7q32.3a	12.1484	17.3996	36.5093	33.8961	-1.17767	1.02497e-07	8.66835e-07
MER4_20q13.13	38.5298	42.3327	122.394	183.142	-1.38753	1.03002e-07	8.69298e-07
HERVIP10FH_5q23.1a	4.79396	9.22213	23.1316	22.3318	-1.10533	1.04036e-07	8.76197e-07
ERVLB4_18q22.2	6.95522	13.6008	26.2817	25.0051	-1.14447	1.09957e-07	9.2414e-07
HERVH_10p15.1	27.685	42.5284	4.05582	17.449	1.18881	1.10431e-07	9.26199e-07
ERV316A3_1q21.3b	29.1561	67.0452	85.7824	103.545	-1.5268	1.18386e-07	9.90872e-07
ERV316A3_20q13.33b	743.494	1041.13	200.78	172.631	1.32852	1.20869e-07	1.00956e-06
HERVL_10p13b	58.8946	49.5931	21.7649	21.4211	1.189	1.21714e-07	1.01453e-06
MER61_5p13.2	43.1731	92.3222	128.641	167.059	-1.69002	1.23115e-07	1.0241e-06
HERVE_11q13.4e	130.262	121.155	44.24	40.227	1.38424	1.27067e-07	1.05481e-06
PABLB_20p12.3	145.187	649.074	0.476429	2.61241	1.47646	1.31116e-07	1.08587e-06
HERVL_Xq21.33c	6.01568	16.5722	22.9216	24.4612	-1.10656	1.31345e-07	1.08587e-06
ERVLE_2q14.1b	45.9723	129.452	2.43675	5.89813	1.25684	1.32797e-07	1.09565e-06
HML2_11q23.3	138.814	208.29	235.233	166.037	-1.77275	1.40279e-07	1.15502e-06
MER101_2q13b	118.642	185.087	6.16821	16.8075	1.79595	1.41314e-07	1.16118e-06
ERVLB4_15q23a	57.6247	56.8091	131.803	88.1182	-1.36486	1.44453e-07	1.18458e-06
HERVH_19q13.32a	24.2993	36.7777	3.33302	8.42174	1.0896	1.48439e-07	1.2148e-06
HERVH_19p13.3b	673.093	944.385	173.999	98.4368	1.32598	1.49904e-07	1.22431e-06
PABLA_8q24.3	107.941	284.361	11.1058	18.538	1.56756	1.53991e-07	1.25517e-06
HERVL18_12q21.31	43.0588	142.502	0.231282	1.76139	1.17688	1.56236e-07	1.2709e-06
ERVLE_8p21.3d	2.77741	8.88793	15.1562	19.2932	-0.94056	1.58954e-07	1.29043e-06
HARLEQUIN_7q33a	1612.7	1094.93	2384.32	947.745	-0.641579	1.59878e-07	1.29533e-06
ERV316A3_5q14.3e	37.4042	56.6452	134.36	177.384	-1.60922	1.6035e-07	1.29656e-06
HERVL_12p13.1b	26.8195	32.5894	5.41906	17.7915	1.18679	1.61994e-07	1.30725e-06
HERVH_12q22	55.0583	76.6873	135.876	123.197	-1.52943	1.62772e-07	1.31091e-06
HERVI_22q11.1b	273.043	823.739	2.91483	20.1879	1.83843	1.64238e-07	1.3201e-06
HERVH_6q24.1b	87.5385	270.306	1.22928	7.32838	1.45308	1.68698e-07	1.35326e-06
MER61_4q31.21b	64.4034	45.6926	129.308	64.4773	-1.04524	1.75021e-07	1.39846e-06
MER4B_3q21.2	751.662	441.326	1326.29	809.065	-0.810111	1.75024e-07	1.39846e-06
HERVIP10F_8p22	2.60274	7.31561	17.3295	20.3151	-1.00613	1.78777e-07	1.42564e-06
HERVL18_4q21.1	432.604	2529.37	15.5616	66.6753	1.79244	1.79234e-07	1.42648e-06
HARLEQUIN_7q32.1a	19.8906	34.285	1.88786	4.94022	1.03988	1.85139e-07	1.47058e-06
MER61_4q21.23a	28.9183	67.4601	0	0	1.13726	1.88937e-07	1.49782e-06
MER41_2q11.2	23.7168	64.3221	100.174	131.704	-1.75012	1.9812e-07	1.56754e-06
MER41_17q25.3	12.7886	23.2419	42.2758	45.9781	-1.30947	1.99315e-07	1.57393e-06
ERVLE_20q13.33b	101.753	125.87	19.3611	33.0047	1.57903	2.02495e-07	1.59593e-06
MER4_4q13.2b	63.0889	225.325	1.12082	3.89302	1.27905	2.0965e-07	1.64812e-06
MER61_2p24.2	19.2212	28.6169	1.92675	5.90526	1.07477	2.09931e-07	1.64812e-06
HERVL_6p21.33b	56.9116	106.652	216.765	377.088	-1.8181	2.13355e-07	1.67176e-06
ERVLE_1q32.2a	111.087	142.548	226.005	185.929	-1.66807	2.14772e-07	1.67962e-06
ERVLB4_2p25.3	32.7569	50.9306	6.22778	10.2396	1.10022	2.25797e-07	1.76243e-06
HERVP71A_8q24.13	25.2054	35.6285	3.25736	7.76534	1.12871	2.28525e-07	1.7803e-06
ERV316A3_3q29	25.3903	28.7263	56.0664	35.8108	-1.215	2.33816e-07	1.81802e-06
MER4_5p13.2a	53.9832	114.648	93.6092	68.4949	-1.40649	2.38053e-07	1.84742e-06
ERVLE_1q31.3g	14.8603	17.5261	38.0433	29.5328	-1.0713	2.52306e-07	1.95428e-06
HERVIP10F_3p26.1	4305.28	20029	17.8084	115.207	2.54869	2.72373e-07	2.10569e-06
ERVLB4_8q23.1e	5.00442	12.1686	22.7503	23.9005	-1.07687	2.77883e-07	2.1442e-06
ERVLB4_13q14.11a	4.00769	8.61031	18.8559	21.6362	-0.956676	2.85756e-07	2.20076e-06
MER41_1q44b	36.1803	61.3268	71.6461	48.2516	-1.23715	2.89704e-07	2.22693e-06
HERVK11_1p13.3	227.804	295.274	454.165	374.428	-1.42373	2.90815e-07	2.23124e-06
HERV4_13q32.3	2567.76	1746.05	1104.38	495.661	0.959709	2.94023e-07	2.25158e-06
HERVH_3q26.31c	97.5761	189.805	15.2562	20.1869	1.4705	3.08892e-07	2.36098e-06
HML2_11p15.4a	111.342	147.036	205.74	128.114	-1.41582	3.19778e-07	2.43951e-06
MER4_4q25a	2.94414	5.86484	23.4227	34.5796	-1.00991	3.20369e-07	2.43951e-06
ERVLE_12p11.23	759.957	491.935	1061.14	296.145	-0.643046	3.21936e-07	2.44683e-06
HERVL_3p13b	51.0508	65.295	9.47609	14.8131	1.34498	3.25758e-07	2.47124e-06
HERVL40_9q21.32	9.57105	13.9377	29.472	23.8118	-1.09872	3.27971e-07	2.48338e-06
HERVL_1p35.2	43.1694	86.9511	1.77263	5.60128	1.26068	3.30666e-07	2.49592e-06
MER4_3q29f	3229.73	1351.74	2135.35	664.349	0.544567	3.31124e-07	2.49592e-06
MER4B_11q13.2	9873.33	11353.3	4645.32	2842.68	0.904797	3.31475e-07	2.49592e-06
MER61_1p31.1a	13.2506	20.0693	40.2038	53.7468	-1.14545	3.33379e-07	2.5056e-06
HERVEA_15q21.3	2274.01	2560.81	3489.27	1428.2	-1.26812	3.41314e-07	2.56049e-06
HERVW_5p13.2a	136.987	117.833	55.8849	44.794	1.15012	3.44455e-07	2.57602e-06
ERVL_6q16.1d	42.4053	144.838	0.328515	2.5019	1.19145	3.44656e-07	2.57602e-06
ERVLE_3p21.31a	37.0428	32.8729	75.8131	39.3022	-1.07179	3.53092e-07	2.63421e-06
HERV3_19p13.3	734.231	817.55	193.739	142.203	1.52653	3.53847e-07	2.63499e-06
MER4_12q12e	21.453	56.6644	54.5483	63.2786	-1.37788	3.58875e-07	2.66753e-06
MER41_17q23.3a	74.7019	214.472	6.07695	12.5874	1.36045	3.63196e-07	2.6947e-06
HERVL18_1q32.2	39.0528	58.7592	9.52322	29.3209	1.3173	3.74587e-07	2.77414e-06
ERV316A3_8q24.12c	56.094	80.7917	112.704	90.4561	-1.24217	3.81892e-07	2.82308e-06
HUERSP1_1p13.3	21.3432	28.5459	63.7395	65.0478	-1.28315	3.9029e-07	2.87872e-06
HERVL_6p25.2	669.528	328.601	387.186	156.224	0.711061	3.90841e-07	2.87872e-06
HERVH_3q23a	18.4589	60.9373	38.0679	33.99	-1.29414	3.95952e-07	2.91108e-06
MER4_17q11.2a	32.3244	107.178	2.53472	6.11277	1.07335	4.07373e-07	2.98961e-06
ERV316A3_4q22.1a	27.5466	45.8533	1.88372	6.30905	1.12018	4.1225e-07	3.01738e-06
ERV316A3_6p22.1a	10.6383	18.7794	0.182456	1.38954	0.812977	4.13379e-07	3.01738e-06
HML3_10q11.21b	62.605	75.2793	138.298	123.908	-1.25215	4.1339e-07	3.01738e-06
ERVLE_1p35.1c	1586.63	853.665	2661.96	1461.47	-0.752806	4.15227e-07	3.02533e-06
ERVLE_1p36.11d	6.53139	21.577	22.6018	28.4563	-1.04409	4.16031e-07	3.02574e-06
HERVL_4q33b	1.14408	5.17056	15.3572	23.1588	-0.967594	4.30446e-07	3.12498e-06
HERVL40_Xp11.21b	252.529	140.452	126.59	69.9029	0.932107	4.35738e-07	3.15774e-06
HERVL66_19p12a	72.8	87.027	18.2583	24.237	1.3942	4.48872e-07	3.24663e-06
MER41_1q44a	112.359	118.275	195.449	114.188	-1.07261	4.49607e-07	3.24663e-06
HARLEQUIN_1p33	44.0827	74.4258	8.35417	14.5276	1.20471	4.66937e-07	3.36577e-06
HUERSP1_Xp22.2	102.023	92.2968	36.8802	29.8832	1.1517	4.82951e-07	3.47502e-06
MER4B_12q22	54.9824	123.496	86.9243	64.9	-1.32252	5.00373e-07	3.58945e-06
HERVL18_7q21.11a	19.2217	44.6637	0	0	0.987492	5.00627e-07	3.58945e-06
ERVLE_2q23.3a	2.68031	6.73046	14.7076	16.6975	-0.882331	5.05341e-07	3.61685e-06
ERV316A3_4p15.32b	1768.46	659.608	2458.66	690.116	-0.497884	5.21906e-07	3.72882e-06
ERV316A3_5q23.3a	0.818394	3.90918	10.5311	13.9788	-0.813687	5.40059e-07	3.85172e-06
HERVIP10F_1q44	77.8316	72.3597	30.4914	28.5191	1.11817	5.60975e-07	3.99387e-06
MER4_1p21.3	1755.85	1172.1	874.56	294.758	0.768103	5.67995e-07	4.03675e-06
MER4_11q21e	95.4054	88.068	192.465	135.421	-1.05968	5.71587e-07	4.05517e-06
ERVLB4_15q13.3a	12.7007	16.285	1.30333	4.65824	0.8851	5.74488e-07	4.06862e-06
HERVH_3q26.1a	61.2278	145.098	1.47211	6.31911	1.39191	5.96857e-07	4.21966e-06
HERVH_8q22.1a	269.634	174.44	525.701	267.997	-1.0383	6.05549e-07	4.27366e-06
PRIMA41_1q32.3	172.017	164.326	60.5582	42.1815	1.118	6.19626e-07	4.3654e-06
ERVLB4_Xq21.33a	27.5203	60.6947	55.617	42.8355	-1.32303	6.35705e-07	4.4709e-06
MER4_3p21.31b	164.369	228.615	253.656	155.068	-1.21217	6.66992e-07	4.68281e-06
HML5_8p21.2	17.9286	23.4026	2.94014	6.31753	0.931329	6.70013e-07	4.69589e-06
HERVH_1p31.1a	1576.18	1242.74	806.704	312.147	0.768787	7.02662e-07	4.9162e-06
HERVH_4q21.3	27.4156	41.2152	70.3061	63.5721	-1.42281	7.05726e-07	4.92913e-06
HERVL_4p15.2c	5.92604	12.0332	24.0166	26.3436	-1.0313	7.08134e-07	4.93744e-06
HERVIP10FH_6q22.1	97.3777	84.5543	159.257	74.2077	-0.872847	7.2464e-07	5.04384e-06
MER101_7q22.1b	84.6471	74.1034	34.2685	28.8201	1.11197	7.3286e-07	5.09231e-06
MER41_3p12.1	92.5363	375.517	1.52367	6.22871	1.29208	7.38146e-07	5.12026e-06
HML2_4p16.1b	177.539	237.078	264.192	137.004	-1.20878	7.45671e-07	5.16361e-06
MER61_Xq25a	17.1991	28.1536	1.44403	4.51553	0.930984	7.48242e-07	5.16622e-06
ERVL_14q22.1	44.8203	50.1274	94.5498	68.6337	-1.24257	7.48598e-07	5.16622e-06
MER41_7q11.23	36.688	41.1516	9.99055	12.5777	1.06313	7.66335e-07	5.27963e-06
HERV3_14q11.2	31.5003	44.4294	2.97388	6.8613	1.17366	7.74987e-07	5.33017e-06
HERVIP10F_14q11.2c	252.109	300.008	343.986	178.687	-1.32257	8.65353e-07	5.9416e-06
HML1_11q13.4	364.998	877.023	43.779	35.2292	1.6098	8.75814e-07	6.00325e-06
MER61_5q23.2b	37.8538	135.428	1.95417	7.54963	1.1043	8.78972e-07	6.01472e-06
HERVH_9p13.3c	250.915	214.798	364.846	125.92	-0.866364	8.95765e-07	6.1193e-06
HERV3_4p16.1	304.104	185.192	157.721	104.498	0.934089	9.08737e-07	6.19747e-06
HUERSP3_10q23.33c	21.0269	27.4042	45.3412	31.8775	-1.08005	9.11247e-07	6.20414e-06
HERVFRD_2p11.2	292.472	229.516	134.142	82.3242	1.00829	9.16235e-07	6.22763e-06
HML3_7q11.21	752.041	1880.51	90.1819	76.9726	1.69004	9.56197e-07	6.48837e-06
HERVH_4q32.2c	94.2747	55.6711	170.694	83.4465	-0.841087	9.77615e-07	6.62261e-06
MER101_12p13.31b	3724.67	2959.43	1895.02	979.811	0.790962	9.99847e-07	6.7619e-06
HERVL18_2q31.1	84.8396	85.5385	193.779	207.77	-1.11848	1.0359e-06	6.99407e-06
HERVH_7q21.2	150.132	100.271	286.428	138.949	-0.98561	1.04373e-06	7.03518e-06
MER4_3q13.2b	7.78265	27.9404	22.4432	24.4156	-1.04134	1.06438e-06	7.16247e-06
HERVH_21q22.3	69.7784	113.154	12.3252	19.7446	1.33559	1.10501e-06	7.42357e-06
HERVH_1p31.1i	4.34789	16.6533	21.4792	34.3241	-1.04203	1.15705e-06	7.76026e-06
HERVH_19q13.41a	632.218	354.666	357.654	147.354	0.709568	1.17761e-06	7.8851e-06
LTR46_6p22.2	2.66246	6.35538	17.6527	24.1538	-0.945174	1.23912e-06	8.28327e-06
ERVLE_8q24.3i	40.5964	54.8504	9.58794	16.6085	1.18133	1.24472e-06	8.30702e-06
HERVH_3q26.1j	14.2696	40.1414	56.4585	99.1785	-1.36811	1.25539e-06	8.36446e-06
HERVH48_12q21.32	4.43005	12.0602	20.2002	25.5087	-1.0009	1.32761e-06	8.81768e-06
HERVL_6q27a	21.5261	38.326	1.39343	4.95562	0.964356	1.32777e-06	8.81768e-06
PABLB_2p13.1	408.088	161.726	583.735	182.855	-0.537114	1.35424e-06	8.97879e-06
HML2_10q24.2	176.369	619.691	17.1041	21.4295	1.51612	1.39718e-06	9.23446e-06
MER41_22q12.3c	34.5608	33.6	68.225	43.2015	-1.07626	1.39737e-06	9.23446e-06
HERVL_12p13.1c	860.215	447.56	513.237	243.873	0.709511	1.40655e-06	9.28002e-06
HERVL40_3q22.2b	12.736	19.7332	1.09317	3.94403	0.843424	1.42114e-06	9.36102e-06
MER41_15q22.31b	71.2173	55.8607	130.268	90.5272	-0.921046	1.45001e-06	9.53572e-06
MER4_12q12d	2.58695	7.48113	13.7471	15.6719	-0.861742	1.45847e-06	9.57576e-06
MER4_15q21.2c	1.45601	4.52737	13.83	18.2458	-0.864238	1.51099e-06	9.90456e-06
HERVFRD_4q32.3	29.2433	36.7302	6.61286	11.6536	1.06813	1.57246e-06	1.02908e-05
MER101_8p23.3	2.52595	6.60985	13.5348	16.9226	-0.821501	1.61997e-06	1.05847e-05
HERVH_20p12.1c	13.0938	28.3804	41.1446	52.0879	-1.18708	1.633e-06	1.06526e-05
HARLEQUIN_1q44	10.4165	43.8575	22.7415	25.7682	-1.08193	1.65471e-06	1.07769e-05
LTR23_1q41	27.4303	38.5955	3.27844	6.85175	1.09051	1.7025e-06	1.10703e-05
HUERSP2_3q21.3	86.8098	107.864	161.313	138.437	-1.27017	1.71152e-06	1.11111e-05
MER4B_3q13.12	19.4991	34.3802	56.1491	67.8145	-1.30001	1.71775e-06	1.11338e-05
ERVLE_22q11.23b	18.9088	21.6517	5.00612	8.4577	0.900063	1.73614e-06	1.1235e-05
HERVH_4p15.2a	9.51583	25.5751	65.3574	89.7812	-1.44362	1.74233e-06	1.12571e-05
ERV316A3_Xq28k	1.09585	4.44612	9.47531	12.1889	-0.755455	1.80738e-06	1.16588e-05
ERV316A3_8q24.22d	2.4278	7.59361	16.2816	25.5011	-0.911111	1.81289e-06	1.16757e-05
MER101_12q13.3	5.62461	12.8769	22.2336	28.6161	-1.04405	1.88915e-06	1.21476e-05
HERVL_7q36.1b	14529.3	8286.78	9757.7	6742.36	0.688591	1.93742e-06	1.24381e-05
HERVK11_5q35.1	59.8879	66.3514	19.1599	24.0726	1.2205	2.01963e-06	1.29454e-05
HERVL_12q13.12	721.78	475.311	420.624	164.518	0.672677	2.07708e-06	1.32927e-05
HUERSP3_1q42.12	1017.09	1044.73	522.295	359.054	0.859494	2.08414e-06	1.33168e-05
HERVE_11p15.4	7443.08	7985.36	11343	6983.24	-1.11415	2.14816e-06	1.37043e-05
ERV316A3_14q23.1e	20.2719	29.1147	3.483	7.30448	0.899591	2.20364e-06	1.40361e-05
HERVL_1q21.2a	52.4811	76.7296	10.6389	19.7469	1.27832	2.2312e-06	1.41893e-05
HERVH_22q11.1	2136.26	4258.5	2107.78	1546.1	-1.63773	2.2614e-06	1.43588e-05
HERVIP10F_7p13	217.14	181.351	329.019	147.937	-0.899796	2.26642e-06	1.43682e-05
HML5_12q12a	3601.83	1318.02	2505.49	516.63	0.460059	2.2874e-06	1.44785e-05
ERV316A3_Xp22.11	181.737	258.569	39.4956	27.3978	1.28268	2.4587e-06	1.55385e-05
ERVLE_4p16.1c	27.2903	32.0106	5.9113	8.91431	1.02739	2.56531e-06	1.6187e-05
HERVE_5q14.3a	62.7591	157.688	0.986328	4.29239	1.24438	2.57537e-06	1.62252e-05
HML5_7p14.1	14.7076	24.2813	32.4067	25.3881	-1.02153	2.6069e-06	1.63983e-05
MER41_3p22.1c	25.7726	48.0538	62.9477	76.6359	-1.22571	2.62272e-06	1.64723e-05
HARLEQUIN_5q12.3	98.7785	351.451	5.36562	16.0057	1.27262	2.67045e-06	1.67461e-05
HERVH_11q14.3	28.3847	30.9196	6.84612	11.454	1.0661	2.69511e-06	1.68746e-05
MER61_13q22.1	15.9416	30.5123	0.963955	3.3122	0.869606	2.70938e-06	1.69378e-05
ERVLB4_3q11.2f	65.2502	244.96	2.22388	6.44085	1.15752	2.76283e-06	1.72454e-05
LTR25_12p11.22b	42.5865	58.5692	87.1473	75.711	-1.16312	2.80392e-06	1.74749e-05
ERVLE_19q13.12c	447.014	279.226	707.436	334.248	-0.70754	2.82673e-06	1.759e-05
MER4_4q26a	9.50985	15.3661	0.562971	3.03838	0.760501	2.88476e-06	1.79236e-05
ERV316A3_6q24.2a	92.391	222.574	3.88535	8.21138	1.38547	2.90807e-06	1.80407e-05
HERVI_7q33a	112.112	230.821	15.8725	56.5906	1.46903	2.94785e-06	1.82596e-05
MER34B_9q22.31b	41.7364	30.649	17.1509	14.7074	0.943383	2.9782e-06	1.84194e-05
HUERSP2_3q26.33	12.224	26.5278	32.4933	31.963	-1.07283	3.14617e-06	1.94286e-05
HERVH_19p13.12	1308.68	3116.09	62.5963	66.5735	2.02376	3.17766e-06	1.95932e-05
MER41_1q24.2	43.0139	31.385	19.241	19.7489	0.972263	3.25011e-06	2.00094e-05
HERVS71_1p35.1	52.3148	48.6077	145.332	151.901	-1.2231	3.26233e-06	2.00541e-05
ERV316A3_13q14.13	71.9084	108.988	124.661	89.1494	-1.11536	3.3048e-06	2.02845e-05
HML3_10q11.21a	932.938	832.341	1510.84	981.031	-0.93695	3.37395e-06	2.06775e-05
ERVLE_8q22.3b	72.1268	54.4811	148.925	97.1397	-0.991112	3.43934e-06	2.10465e-05
HERVIP10FH_8q24.3	218.157	147.099	326.46	123.958	-0.72397	3.47994e-06	2.12628e-05
ERVLB4_11p15.5e	604.484	2376.56	392.132	382.69	-1.59406	3.63343e-06	2.21672e-05
MER4_13q32.3a	68.5488	73.7688	24.452	29.3858	1.12646	3.74333e-06	2.28033e-05
HERVH_3p12.3b	4.17698	13.4463	15.8218	20.5162	-0.871938	3.93771e-06	2.39514e-05
ERVLB4_22q13.31b	100.379	60.5217	150.577	58.6418	-0.68837	3.96687e-06	2.40927e-05
ERV316A3_4q35.2d	2.22708	5.10447	14.3694	16.7181	-0.844852	3.99853e-06	2.42486e-05
ERVLE_12q13.11b	11.9978	15.8349	36.5594	38.0416	-1.02059	4.01191e-06	2.42934e-05
HERV4_3p12.3	42.733	106.126	0.463391	2.47515	1.15566	4.07639e-06	2.4647e-05
HERVH_3q21.3b	10.8476	15.2017	37.3316	40.9466	-1.04072	4.29512e-06	2.59308e-05
ERVLE_5q23.3g	31.8081	56.5411	1.70997	4.88087	1.12546	4.4176e-06	2.66305e-05
ERVLE_14q31.3h	5.89845	13.333	15.9798	15.8836	-0.844259	4.50024e-06	2.70884e-05
HML2_17p13.1	1325.5	2575.24	2410.06	4575.33	-1.9026	4.52651e-06	2.72061e-05
PABLA_16p13.3a	580.095	247.125	379.158	148.145	0.578001	4.53364e-06	2.72086e-05
ERVLE_5q14.3h	34.8145	64.809	4.47307	13.7742	1.1486	4.62714e-06	2.77286e-05
HERVL_9q13b	314.34	1064.49	5.89285	21.3247	1.67547	4.82027e-06	2.88433e-05
HERVIP10FH_8q21.3	15.0922	23.6086	2.21484	7.41935	0.868746	4.97762e-06	2.97409e-05
HERVK11D_12q12	31.2547	42.5443	6.03636	12.53	1.07422	5.03971e-06	3.00675e-05
ERV316A3_3q13.12e	11.3276	20.3575	25.9723	25.3848	-0.948236	5.06438e-06	3.01631e-05
HUERSP1_2q31.1a	31.4167	53.7948	2.41212	9.20904	1.09158	5.07062e-06	3.01631e-05
ERVLE_6p21.32	57.0902	92.5446	272.42	419.319	-1.71066	5.10258e-06	3.03088e-05
HERV3_9q34.13	19.6501	20.8904	49.2129	49.106	-1.04028	5.13657e-06	3.0466e-05
ERVLE_19q13.2a	6.17124	14.0393	20.0248	22.3327	-0.954328	5.1875e-06	3.0723e-05
HERVH_1q41e	66.0314	84.3818	13.6347	23.2732	1.2938	5.50919e-06	3.25806e-05
MER61_4q21.1b	59.5257	357.512	3.65896	12.5457	0.93714	5.5425e-06	3.27298e-05
ERVLB4_21q22.2	1.52465	6.23025	15.3186	24.813	-0.860377	5.60663e-06	3.30604e-05
MER4_1p12a	90.9592	255.01	258.155	392.339	-1.85317	5.6898e-06	3.3502e-05
HERVL40_1q44	235.96	151.542	116.55	68.0655	0.957332	6.01413e-06	3.53442e-05
HERVEA_4p15.1	363.226	663.349	44.0141	51.9619	1.67913	6.02013e-06	3.53442e-05
MER4_12q12b	7.96634	25.0714	22.6621	26.6007	-0.947185	6.26718e-06	3.67415e-05
ERV316A3_2p25.3b	30.5405	32.4107	10.3528	15.292	0.956318	6.29395e-06	3.68451e-05
HERVH_6q12c	14.0511	24.4292	1.28843	5.03076	0.841522	6.38467e-06	3.73222e-05
MER61_6q22.33	23.0587	51.5778	0.826449	3.39585	0.948406	6.42482e-06	3.75028e-05
ERVLB4_2q37.1a	808.287	418.643	1096.99	321.915	-0.553736	6.52972e-06	3.80603e-05
ERVLE_22q13.33	943.05	917.19	526.362	394.815	0.731195	6.59807e-06	3.84034e-05
ERV316A3_2q32.2c	42.1137	78.6799	8.58379	13.4045	1.09616	6.85584e-06	3.98465e-05
HUERSP1_7p12.3a	15.8129	25.8283	1.88463	5.53657	0.863159	6.89382e-06	4.00098e-05
HML2_8p23.1d	99.6152	106.367	249.201	184.743	-1.57513	6.90588e-06	4.00225e-05
HERVH_4q28.3i	0.536109	2.98571	10.4467	16.1138	-0.75909	6.95546e-06	4.02522e-05
ERVLB4_3p21.31a	982.498	357.156	1342.16	399.083	-0.463545	7.04856e-06	4.07328e-05
HERVIP10F_2q21.2	27.1597	66.7961	1.31735	4.43925	0.921439	7.19353e-06	4.15114e-05
HERVH_14q11.2a	400.459	427.189	576.301	327.919	-0.918181	7.24271e-06	4.17357e-05
MER34B_19p13.11	72.8071	64.7854	162.632	142.784	-1.13646	7.27048e-06	4.18362e-05
HERVEA_19p13.3	29.8089	42.82	6.48951	11.3992	0.989796	7.46465e-06	4.28926e-05
HARLEQUIN_Yq11.221c	99437.2	80921.3	57728.2	48143.3	0.781613	7.59128e-06	4.35585e-05
HERV9_11q21	41.847	48.6309	10.7836	13.6724	1.0537	7.6174e-06	4.36465e-05
ERVLE_16p11.2a	28.0666	48.1549	2.35342	7.12524	1.0434	7.79595e-06	4.46065e-05
LTR19_6q25.3a	965.203	941.743	493.407	181.453	0.674068	7.89856e-06	4.51299e-05
ERVLE_14q31.3e	1.29199	5.2452	9.28115	13.0903	-0.707796	7.92617e-06	4.51745e-05
HERV4_8q24.3	57.3386	129.189	8.69175	12.9124	1.16674	7.92867e-06	4.51745e-05
HERVH_7q22.3b	811.29	3196.1	25.716	43.288	1.93869	8.03961e-06	4.57422e-05
ERV316A3_13q14.11a	9.33296	20.7918	33.0501	43.8095	-1.0801	8.82176e-06	5.0122e-05
HERVH_12p11.22a	46.5194	56.6475	95.6728	88.0043	-1.16774	8.90378e-06	5.04848e-05
MER41_17q23.3b	147.276	273.425	30.9414	81.4655	1.51662	8.91055e-06	5.04848e-05
HERVIP10F_3p21.31	319.505	172.054	459.43	177.249	-0.570278	8.93515e-06	5.04923e-05
HERVL40_10p12.1	13.112	16.9151	31.478	25.4626	-0.959438	8.9368e-06	5.04923e-05
ERVL_1q44b	119.596	94.9422	204.411	139.375	-0.821807	9.00561e-06	5.07888e-05
HERVIP10FH_4p13	287.888	1098.58	6.00801	13.4585	1.5112	9.01435e-06	5.07888e-05
ERV316A3_4p15.2d	20.4203	30.8986	3.96394	9.36191	0.930323	9.14871e-06	5.14167e-05
HERV4_15q26.1	21.0629	47.9167	1.61079	4.9208	0.913786	9.15118e-06	5.14167e-05
HERVL_6q11.1b	12.4382	25.9046	25.3749	21.9631	-0.929822	9.35487e-06	5.24883e-05
HML2_11q12.3b	335.338	311.616	546.761	276.449	-1.03377	9.59156e-06	5.37142e-05
ERVLE_14q12b	547.982	362.074	299.258	228.352	0.795328	9.59987e-06	5.37142e-05
HERVW_4q21.22	350.285	1114.32	41.9804	33.9885	1.33903	9.78209e-06	5.46582e-05
PRIMA4_21q22.3	30.4967	23.7714	56.8616	33.698	-0.863518	9.85541e-06	5.49921e-05
LTR25_7q21.12	140.121	93.1273	71.1373	45.4286	0.885736	9.9318e-06	5.53421e-05
HERVH48_8q12.3	7.53824	14.4367	21.4461	20.0963	-0.920934	1.018e-05	5.66474e-05
MER4_6q26b	3.48207	7.00462	14.2682	18.2712	-0.737863	1.0372e-05	5.76364e-05
ERVLE_5q31.3d	24.5963	28.4012	46.6488	36.0748	-0.934861	1.04669e-05	5.80843e-05
HUERSP1_1q44a	97.9751	87.9147	44.0448	39.2231	1.04125	1.05081e-05	5.82331e-05
HERVK11D_5p13.2	161.705	370.588	191.17	137.38	-1.3304	1.06438e-05	5.89042e-05
ERVL_Xq28b	39.3891	92.9597	0.50981	2.72595	1.08403	1.08691e-05	6.00532e-05
HERVW_1p13.3	17.8293	44.7002	38.5189	44.2654	-1.09273	1.0881e-05	6.00532e-05
HML4_8q24.3	15661.9	9519.39	10672.9	5645.57	0.555976	1.10565e-05	6.09385e-05
HERVH_1p34.2a	145.182	76.0272	80.9366	28.6588	0.667831	1.11572e-05	6.14099e-05
HML2_7p22.1	89.0543	191.644	7.84505	19.9791	1.35922	1.13692e-05	6.24922e-05
HML3_13q12.11b	136.016	117.292	230.03	131.115	-0.906295	1.2137e-05	6.66219e-05
HERVH_4q35.2a	8.58927	18.8891	24.0193	27.0088	-0.949899	1.23618e-05	6.77639e-05
LTR25_3q26.33a	19.7659	52.0863	0	0	0.902186	1.25059e-05	6.84614e-05
MER41_6q14.1b	14.1499	31.1798	0.848218	4.60439	0.799591	1.27062e-05	6.93914e-05
HERVH_3q21.3a	39.5254	55.1956	83.6631	73.9671	-1.20836	1.27101e-05	6.93914e-05
MER41_Xp11.23	10.9891	17.9205	0.630347	2.787	0.768606	1.2741e-05	6.94667e-05
ERV316A3_7q33a	30.5365	89.5771	0	0	0.959453	1.27715e-05	6.95393e-05
MER61_1q23.1c	1106.11	1155.92	342.304	376.666	1.32704	1.28163e-05	6.96896e-05
HERVH_9q21.33c	74.2221	62.3617	122.09	65.9574	-0.9316	1.3085e-05	7.10555e-05
HERVH_3q21.3c	10.0358	16.1046	30.9865	31.1897	-0.997478	1.31198e-05	7.1149e-05
MER4_Xq21.31c	5076.63	3226.93	3007.74	1721.88	0.684385	1.32996e-05	7.20277e-05
HML6_7p13	673.563	596.278	910.424	346.694	-0.687753	1.35031e-05	7.29829e-05
HERVIP10FH_15q13.3	14.2005	20.5029	32.5164	29.2894	-0.942059	1.3512e-05	7.29829e-05
HERVH_6q22.1c	101.749	115.323	31.0454	26.0307	1.14494	1.38251e-05	7.45747e-05
MER41_14q13.1	9.52795	13.8099	1.12324	3.44092	0.69159	1.39309e-05	7.50455e-05
HERVE_19q13.41	144.36	108.43	66.6079	35.7472	0.83425	1.40118e-05	7.53808e-05
HML2_4p16.1a	483.826	1140.34	1676.53	3650.43	-1.66218	1.43793e-05	7.72551e-05
ERV316A3_1p32.1a	54.4084	46.7228	92.7069	56.2137	-0.86132	1.48708e-05	7.97904e-05
HERVI_7q33b	21.9997	40.4042	1.46519	5.3946	0.953739	1.52529e-05	8.1732e-05
HERV9_5q31.2	332.218	1341.75	32.6904	32.6446	1.42607	1.53136e-05	8.18707e-05
HUERSP3B_1p35.1	32.5622	36.4053	11.291	13.1823	0.918731	1.53192e-05	8.18707e-05
PRIMA41_12p11.21	33.3075	75.8677	4.4494	9.71406	0.999971	1.56705e-05	8.36379e-05
HERVH_4q22.1c	4.081	8.92116	16.0558	20.1509	-0.821919	1.57665e-05	8.40398e-05
ERV316A3_15q21.3c	17.1985	32.2849	0.812734	3.08278	0.869264	1.5875e-05	8.45066e-05
LTR23_4p16.3b	10.7793	22.4733	0.157124	1.19662	0.72962	1.59593e-05	8.4844e-05
MER61_1p34.1a	20.2971	24.0807	6.95344	10.8807	0.830482	1.63174e-05	8.66338e-05
HERVH_5q35.3	6.44368	21.7883	32.4112	53.2867	-1.13428	1.63813e-05	8.68593e-05
HERVIP10FH_10p11.23	52.598	36.8039	87.3938	43.1856	-0.791332	1.67941e-05	8.8932e-05
HERVL_12q21.1f	23.8793	126.736	0.253902	1.93366	0.776204	1.68517e-05	8.91203e-05
ERVLB4_22q11.1b	15.3393	29.1591	0.740857	3.28004	0.841781	1.69495e-05	8.95207e-05
ERVLE_20q13.33a	35.3658	45.6221	8.1167	14.429	1.04271	1.74629e-05	9.21125e-05
HERVH_12p12.2b	127.315	354.355	2.40017	8.05637	1.38377	1.79009e-05	9.42997e-05
HML2_6q25.1	106.755	93.5683	183.327	112.399	-1.01051	1.79871e-05	9.45372e-05
HARLEQUIN_6q23.1	18.6451	20.4468	5.74697	13.7123	0.919291	1.79926e-05	9.45372e-05
HERVH_1p34.3d	2.44002	7.48157	15.4048	23.5034	-0.837308	1.80518e-05	9.4725e-05
PABLB_14q11.2a	141.357	177.972	179.663	110.551	-1.10377	1.81574e-05	9.5156e-05
ERV316A3_2p16.1a	237.711	135.691	133.504	88.5776	0.847157	1.82272e-05	9.53987e-05
HERVE_2p14a	32.5258	37.0539	11.1125	24.8286	1.02573	1.8356e-05	9.59488e-05
MER41_9q31.1a	24.1358	23.0653	49.2482	36.6181	-0.938972	1.90248e-05	9.93162e-05
HUERSP1_20p12.3	74.2078	317.844	0	0	1.02483	1.93382e-05	0.000100823
HERVL_4q32.1c	129.916	182.9	25.4791	35.1917	1.37585	2.00351e-05	0.000104321
HERVL_12q21.1e	21.3596	86.6725	0.253902	1.93366	0.807723	2.04143e-05	0.000106083
HARLEQUIN_5q33.3	60.7705	77.9679	23.313	27.7638	1.05537	2.04257e-05	0.000106083
HERVH_7q31.33b	18.0631	41.2546	1.20761	4.02926	0.862678	2.10569e-05	0.000109221
HERVIP10FH_14q12	204.014	275.713	58.8855	63.9734	1.22664	2.11338e-05	0.000109479
HERVW_2q12.2	5.66207	13.621	19.1983	25.0426	-0.847994	2.14585e-05	0.00011102
ERV316A3_3q13.13b	16.8899	35.3098	46.8807	68.0177	-1.13589	2.18052e-05	0.00011267
ERVLE_8p23.1b	185.51	170.496	251.839	95.4156	-0.699914	2.19795e-05	0.000113425
HERVH_2p22.2c	350.644	1040.47	389.614	420.142	-1.49361	2.22384e-05	0.000114615
MER101_1q24.3b	6.08992	14.5444	22.1044	27.3143	-0.942433	2.23926e-05	0.000115264
ERV316A3_5q35.3d	27.4136	22.7569	12.2005	15.1268	0.8416	2.25116e-05	0.000115729
ERVLB4_8p11.23b	468.727	697.736	606.777	292.6	-0.692869	2.30156e-05	0.000118144
MER4_20p11.21a	54.9038	41.647	27.7295	28.7451	0.957527	2.30397e-05	0.000118144
PABLA_16p13.3b	697.237	337.746	468.138	177.915	0.533882	2.3221e-05	0.000118923
PRIMA41_20q13.33	13.2604	30.4032	0.581408	3.35446	0.762969	2.4132e-05	0.000123433
HERVL40_7q21.2	14.1286	18.0947	29.7915	25.5156	-0.877888	2.41755e-05	0.000123499
HERVH_12p12.1b	12.616	23.3458	42.2499	56.3242	-1.04673	2.44127e-05	0.000124554
MER4_4p12a	247.044	297.433	78.8815	54.5198	1.10936	2.44862e-05	0.000124772
ERV316A3_3q27.3e	97.8504	72.0853	152.386	75.9514	-0.819205	2.49252e-05	0.000126849
HERVH_7p14.3f	42.7747	51.4384	8.793	11.9429	1.04481	2.50687e-05	0.000127419
HML5_19p12f	6.21244	17.2748	18.4909	22.8125	-0.865466	2.55246e-05	0.000129467
HML6_4q21.1	33.1475	69.1255	6.55035	17.2831	1.02463	2.55548e-05	0.000129467
HERVW_7q21.2	102.85	90.1428	191.846	136.033	-0.948069	2.55675e-05	0.000129467
MER41_6q21a	18.8918	23.8032	5.72124	9.916	0.806319	2.58652e-05	0.000130811
HERVH_2q24.3b	2.02183	6.27414	16.6155	26.649	-0.835348	2.64648e-05	0.000133496
HERVL18_11q14.2b	89.7725	144.98	17.1508	19.6021	1.22779	2.65014e-05	0.000133496
HERVK11D_3q11.2	350.648	712.115	38.946	86.1501	1.8226	2.65079e-05	0.000133496
HERVKC4_1q22	214.565	209.705	105.376	54.9111	0.796878	2.65278e-05	0.000133496
HERVIP10FH_17q21.32	54.9114	45.4773	28.2963	24.1362	0.816231	2.67372e-05	0.000134383
HERVL_6q14.1e	12.5771	27.8652	0.644775	2.89748	0.7558	2.72499e-05	0.00013679
HERVS71_19p13.3	231.112	150.373	425.764	419.68	-0.807351	2.901e-05	0.000145445
HERVK11_6q25.3	29.5247	67.7698	8.50279	19.0537	0.899022	2.90472e-05	0.000145451
HERVIP10FH_3q13.33	31.4996	81.7095	4.40712	9.13705	0.953839	2.97686e-05	0.00014888
ERVLB4_19q13.12	413.599	264.7	237.366	118.313	0.691885	3.03017e-05	0.000151359
HERVH_18q21.32	5.87508	13.3886	16.9016	17.3985	-0.852149	3.07581e-05	0.00015329
HERVEA_6q22.31	1766.81	2691.53	400.051	532.328	1.61877	3.0764e-05	0.00015329
MER4_15q22.31a	32.1865	30.0087	61.9284	45.4564	-0.899786	3.08897e-05	0.000153728
HERVW_6p25.3	8.85875	16.6175	21.9334	19.3102	-0.871837	3.10479e-05	0.000154325
HERVH_3p22.2b	13.106	30.8474	38.0359	49.7944	-1.0382	3.12618e-05	0.000155104
ERVLE_4q21.1b	244.087	241.34	335.375	154.854	-0.759439	3.12812e-05	0.000155104
ERVLE_4q21.23a	13.6318	16.4752	28.7709	23.3404	-0.817255	3.14886e-05	0.000155942
HARLEQUIN_10q23.33	2.31953	6.6326	12.3094	16.4418	-0.737214	3.15473e-05	0.000155948
HERVIP10FH_11p15.5	6094.93	20507.8	3616.53	3112.58	-1.4655	3.15669e-05	0.000155948
ERVLE_3q11.1	5.74796	9.89167	17.1052	17.6841	-0.77054	3.18138e-05	0.000156976
ERVLE_17q24.1	15.732	28.0666	2.24743	6.08846	0.833353	3.21578e-05	0.000158481
HERVP71A_10q25.1	30.6951	79.7029	3.27353	7.95244	0.930767	3.23763e-05	0.000159364
MER4_4p12b	71.2975	106.87	22.1136	20.0898	1.03113	3.2935e-05	0.000161917
PABLB_8q24.3a	27.7737	30.2558	7.56276	10.6183	0.902475	3.30298e-05	0.000162186
HERVL18_5q21.2	19.344	51.3198	0	0	0.827079	3.36756e-05	0.000165157
MER34B_1p13.2	18.7472	27.2024	4.90156	9.11201	0.829267	3.39066e-05	0.000166089
MER4_7q21.2	35.5809	32.9583	58.889	37.196	-0.932017	3.39816e-05	0.000166255
HERVH_12q13.2b	149.276	131.666	237.811	148.458	-0.926432	3.46087e-05	0.000169006
MER101_22q12.3	14.078	25.5742	29.5309	25.8798	-0.895886	3.46272e-05	0.000169006
HML6_3p25.1	142.559	135.765	251.366	179.919	-0.896226	3.48007e-05	0.000169648
MER41_6q14.1e	141.264	133.558	51.1805	41.5239	1.06815	3.49629e-05	0.000170234
HML1_10p15.1	3760.44	16759	28.368	109.576	2.18374	3.5119e-05	0.000170789
ERV316A3_5q35.3c	33.1614	113.602	1.51415	4.55324	0.931867	3.64155e-05	0.000176798
HERVH_2q23.3c	23.3644	62.0457	0.603642	3.40695	0.880693	3.6442e-05	0.000176798
HERVL18_21q21.3	59.8773	141.466	9.56546	14.1506	1.071	3.65687e-05	0.000177201
ERVLE_Xp11.4b	12.7886	43.3866	25.0472	27.8672	-0.991013	3.78886e-05	0.000183215
HERVL_9q31.1a	7.75117	11.3241	24.0939	36.1334	-0.850206	3.79065e-05	0.000183215
MER41_3q13.31b	199.696	156.207	118.536	91.4242	0.80946	3.7978e-05	0.000183215
HERVP71A_1q44b	159.014	168.309	72.1419	56.5256	0.957331	3.79908e-05	0.000183215
ERVLB4_2p16.3	6.18617	12.7154	16.5106	17.6142	-0.73448	3.84117e-05	0.000185025
HERVL_9q13a	773.204	2337.35	8.47003	19.7998	1.79483	3.86069e-05	0.000185744
HUERSP3_2p13.3	97.5625	80.6413	181.484	116.949	-0.900028	3.88889e-05	0.000186879
LTR25_6q24.1	85.5169	359.138	1.33062	4.17337	1.01754	3.91922e-05	0.000188113
HERVK11_8q11.1	40.4445	104.918	0.645955	3.99003	0.983326	3.93687e-05	0.000188737
MER101_2q13a	41.3786	120.518	0.257319	1.95968	0.991925	4.01051e-05	0.00019204
HERVH_3q13.2	156.837	469.326	132.985	116.908	-1.38398	4.02588e-05	0.000192548
HERVL32_2p15a	12.428	19.2911	1.76215	5.24738	0.739453	4.12503e-05	0.000197058
HARLEQUIN_11q22.1b	6.64327	12.4633	18.2587	17.9836	-0.785568	4.19258e-05	0.000200049
HUERSP3B_9p13.3a	44.5292	56.4548	84.285	73.3197	-1.01201	4.23455e-05	0.000201814
PRIMA41_13q13.1	1.74216	5.36327	11.8205	19.6322	-0.740954	4.26553e-05	0.000203051
HML5_8p23.2b	14.9479	73.807	21.3432	23.1043	-0.931827	4.28809e-05	0.000203886
ERVLB4_20p11.23b	10.4311	14.0278	23.6195	23.5933	-0.807541	4.34605e-05	0.000206399
ERVLE_11q24.3d	21.8554	51.1536	1.67464	7.05099	0.870054	4.35171e-05	0.000206426
ERVLE_2q36.3b	12.0133	24.1121	0.569609	3.06836	0.737731	4.37275e-05	0.000207181
ERV316A3_6p21.2a	69.7535	128.41	96.0481	60.5464	-1.10056	4.41919e-05	0.000209137
HERVH_10p12.1c	31.2861	68.3639	4.48801	9.35222	0.955115	4.43071e-05	0.000209437
MER4_11q12.1e	11.0303	10.7918	29.3731	27.8469	-0.786061	4.48429e-05	0.000211724
ERVLE_1p36.13b	522.743	281.089	331.55	172.65	0.638184	4.49924e-05	0.000212182
HERVFH21_19p12	14.5828	21.252	3.59637	9.26181	0.765766	4.52337e-05	0.000213012
HERV9_19p13.3	25.8911	43.9796	46.8704	42.772	-0.984716	4.52737e-05	0.000213012
ERV316A3_6p22.1m	43.6804	50.7888	81.2357	59.9905	-1.08845	4.58736e-05	0.000215585
HERV4_5q22.2	61.473	174.305	7.24229	14.0562	1.10029	4.65511e-05	0.000218515
ERV316A3_4q21.3	5.1314	10.4304	22.5906	32.6303	-0.8461	4.80646e-05	0.000225358
ERV316A3_10p12.2	7.39422	21.7219	22.9843	33.6973	-0.872196	4.82457e-05	0.000225946
HUERSP1_8q13.3	64.3329	63.542	24.4925	26.9341	1.06447	4.8858e-05	0.000228549
HERVL_2p11.2b	39.8364	34.1154	75.1182	51.8286	-0.88267	4.97122e-05	0.000232277
HERVK11_1q32.3	212.986	362.677	83.3091	63.2988	0.936032	5.00542e-05	0.000233606
HERV9_12q23.3	12.3707	36.0879	0	0	0.719054	5.01435e-05	0.000233753
HERVH_8q23.3d	80.0067	221.807	84.3056	70.4353	-1.33369	5.07018e-05	0.000236084
HERVL40_18q11.2c	29.6111	69.8576	123.643	213.691	-1.41808	5.10552e-05	0.000237456
HERVW_12p13.1	42.7815	66.4545	10.3801	15.4175	0.96751	5.19731e-05	0.000241449
MER34B_10q25.3a	33.6385	35.17	65.111	67.1265	-0.934441	5.20889e-05	0.000241709
HERVEA_5q35.3	88.143	221.225	5.31158	12.7158	1.19993	5.23537e-05	0.00024266
ERVLE_17q24.3a	4.82767	9.28801	21.7948	27.8874	-0.87186	5.2845e-05	0.000244657
PABLB_10p15.1a	47.072	58.8631	70.2364	42.8009	-0.959546	5.50945e-05	0.000254781
HML3_1p21.3	87.61	126.45	145.55	86.6522	-1.02597	5.53796e-05	0.000255807
HERVS71_8p23.1a	91.4192	142.277	221.368	216.756	-1.49334	5.56963e-05	0.000256977
HML1_6q27a	487.1	886.022	1887.43	2343.69	-1.91022	5.72023e-05	0.000263625
HERV3_7q34c	62.7003	99.2283	22.0481	21.5748	0.934759	5.73262e-05	0.000263896
ERVLE_Xq22.1a	183.236	112.786	272.228	107.099	-0.715799	5.74026e-05	0.000263948
HERVH_1p31.1f	11.0042	25.1469	27.5777	31.1437	-0.916417	5.77165e-05	0.00026509
ERVLE_4p12e	27.7042	27.2869	49.6689	33.6942	-0.866543	5.81076e-05	0.000266584
HERVL18_3p21.31b	536.981	851.17	120.889	98.7552	1.29702	5.9108e-05	0.000270867
PRIMA4_12p11.21a	572.243	594.452	262.86	132.076	0.810305	5.96542e-05	0.000273061
ERVLE_1p34.2a	60.9341	46.9626	27.4324	26.1903	0.92439	6.04144e-05	0.000276229
HERVK11_2q14.2	7.37107	12.5734	21.8488	23.0706	-0.848784	6.10404e-05	0.000278776
MER4_2q14.1a	26.9657	44.3754	6.22602	8.75656	0.825158	6.11505e-05	0.000278828
MER4B_8q21.11	913.891	513.067	557.34	308.315	0.656711	6.11894e-05	0.000278828
LTR25_7q11.21	398.205	188.768	266.453	105.045	0.539393	6.17786e-05	0.000281197
HERVL74_7q21.3a	11.8976	25.8202	0.126054	0.959999	0.712309	6.3533e-05	0.000288858
HERVS71_19p12b	1.89485	7.07032	9.73899	14.4194	-0.647912	6.39834e-05	0.000290579
ERV316A3_3q13.13d	35.9705	174.643	0.183172	1.39499	0.85217	6.44988e-05	0.000292592
ERV316A3_6p22.1p	40.7852	46.7955	62.3591	37.7538	-0.837215	6.47907e-05	0.000293587
HERVK11_8p23.1c	152.95	175.618	372.152	317.578	-1.41716	6.64569e-05	0.000300801
MER4_12q12c	2.15544	6.48492	11.0662	14.7803	-0.691766	6.69604e-05	0.000302742
ERV316A3_5q13.2a	16.9537	41.4973	0.724026	3.94371	0.79881	6.81708e-05	0.000307871
MER61_4q31.23	43.5033	51.1633	110.015	168.668	-1.12267	6.82684e-05	0.000307968
HERVH_7p21.1a	818.833	1103.34	1153.86	845.294	-1.15662	6.83618e-05	0.000308046
ERV316A3_4q31.1b	35.7159	34.8206	56.352	31.2664	-0.842862	6.85711e-05	0.000308368
ERVLB4_8p12a	12.6118	25.4498	1.34656	6.85033	0.754627	6.85854e-05	0.000308368
HERVIP10F_19q13.41a	1046.6	763.865	585.428	199.925	0.611581	6.90843e-05	0.000310267
HERVFRD_10p15.1a	44.1284	58.2637	11.6865	17.3968	1.02963	6.92379e-05	0.000310612
ERVLB4_1p22.3c	87.302	209.942	124.345	89.0926	-1.01541	6.99569e-05	0.000313491
HERV3_7q33	1879.71	1830.64	2598.04	1526.15	-0.644097	7.07108e-05	0.000316519
HERVE_19q12	59.2262	200.337	1.35073	5.28691	1.03723	7.11957e-05	0.000318338
HERVS71_3p12.3	21.348	28.467	56.352	66.3602	-1.00813	7.32762e-05	0.000327279
LTR25_12p11.22a	7.86015	14.095	21.115	24.4924	-0.823689	7.36353e-05	0.000328521
HERVH_21q21.1b	24.1693	33.0159	46.3609	40.9217	-0.950141	7.41015e-05	0.000330237
HERVL_7q32.1	102.078	400.336	8.44871	11.1464	1.05	7.4264e-05	0.000330597
PRIMA41_3q12.3	1.15761	3.94889	11.5877	22.1044	-0.697255	7.45407e-05	0.000331465
MER41_11q25	5.41886	16.747	18.9918	24.4395	-0.818879	7.53827e-05	0.000334841
MER41_3p22.1a	7.03678	12.1415	19.0224	18.5944	-0.79338	7.64985e-05	0.000339425
ERVLE_11p15.4f	32.9731	40.4937	67.1298	77.7603	-0.937984	7.74932e-05	0.000343463
HARLEQUIN_1p13.2b	183.603	207.123	253.982	148.652	-0.857033	7.79416e-05	0.000345072
HERVL40_5q14.3d	2.15506	6.70546	10.7007	15.5131	-0.681711	7.92638e-05	0.000350543
ERV316A3_2q12.3d	123.198	269.366	17.0631	23.495	1.23667	7.94117e-05	0.000350814
HERVE_3p12.3a	43.5771	112.991	4.19016	11.1633	0.996485	7.97154e-05	0.000351773
ERVLB4_2q14.2b	17.7481	31.3252	3.23418	6.95648	0.776117	8.00169e-05	0.000352588
ERVLE_8p23.1a	9.91295	14.2275	21.1649	18.3913	-0.73428	8.00742e-05	0.000352588
HERV9_17q22a	5.38629	18.2037	17.7208	26.8641	-0.819579	8.05087e-05	0.000354116
HERVL40_18q22.1a	113.297	345.71	0.201208	1.53236	1.11598	8.07942e-05	0.000354986
MER61_2q32.3a	31.899	82.8899	0.22184	1.68949	0.88947	8.1559e-05	0.000357958
HERVS71_5q15	97.779	78.819	48.3058	33.1836	0.821848	8.19787e-05	0.000359411
HERVL_9p11.2	536.178	1336.12	12.0982	32.6455	1.70235	8.2548e-05	0.000361516
HERVK14C_16p12.3	632.411	950.631	737.952	421.34	-1.048	8.2776e-05	0.000362123
ERV316A3_3q27.3d	12.8016	15.3248	3.3661	6.51103	0.69741	8.34338e-05	0.000364607
HML3_7p12.3a	17.1069	24.4141	3.59195	8.14	0.81735	8.38941e-05	0.000366107
HERVL40_9p24.1a	83.081	76.1749	40.6328	34.3374	0.853573	8.39579e-05	0.000366107
PABLB_1q31.3a	300.629	305.688	414.609	206.023	-0.80421	8.44019e-05	0.000367648
HERVH_2p12a	5.35789	12.0366	20.2195	26.1289	-0.824605	8.476e-05	0.000368811
HERVEA_5q14.3	17.7551	48.4636	0	0	0.78069	8.7045e-05	0.000378347
MER41_Xp22.2	53.6807	68.8167	20.2008	26.1674	0.959009	8.73487e-05	0.000378613
HERVW_6q27a	557.033	1174.29	1908.77	2523.68	-1.90653	8.74001e-05	0.000378613
HERV9_3q25.1	18.8101	50.174	53.2273	105.126	-1.08744	8.74255e-05	0.000378613
ERVLE_7p22.3	129.002	285.66	32.8627	36.4024	1.17447	8.74801e-05	0.000378613
HERVH_10q24.2a	39.1662	38.1406	58.3983	32.4171	-0.768661	8.76276e-05	0.000378847
PRIMA41_1p36.13a	7.76996	19.9967	28.4183	41.3612	-0.923621	8.77265e-05	0.00037887
HERVL18_18q21.32	4.23296	17.1583	23.9359	61.6245	-0.870148	8.78869e-05	0.000379159
HUERSP3_2p23.1	40.2772	44.8822	15.8088	20.375	0.944813	8.88138e-05	0.000382071
ERV316A3_21q21.1f	26.2873	85.0861	0	0	0.809355	8.88562e-05	0.000382071
ERVLE_10p13a	10.5095	16.0056	24.1405	24.2893	-0.815553	8.89184e-05	0.000382071
HUERSP3B_7p21.3	272.3	242.209	116.397	58.4808	0.836934	8.89393e-05	0.000382071
ERVLB4_8p12b	15.5081	18.9107	36.4846	37.4951	-0.859209	8.9159e-05	0.000382609
MER41_19q13.43a	234.881	130.496	143.127	77.0499	0.663452	9.00058e-05	0.000385835
MER41_14q32.2	25.4073	28.8163	57.5676	47.1514	-0.953747	9.16168e-05	0.000392325
HARLEQUIN_10q22.1	44.9589	45.8362	84.3281	67.6302	-0.941098	9.28578e-05	0.000396859
HERVS71_4p16.1b	61.5927	87.6517	83.9706	60.4059	-0.947042	9.28714e-05	0.000396859
HML2_14q11.2	86.8525	88.2919	42.5102	36.4891	0.888277	9.38119e-05	0.000400455
HARLEQUIN_2q12.3	63.8866	50.0026	33.6815	28.5656	0.866677	9.59667e-05	0.000409222
ERVLE_11q13.4a	5.47045	16.34	19.8295	30.218	-0.828189	9.66482e-05	0.000411695
MER41_1p34.3	23.8812	25.203	58.0357	63.2509	-0.955446	9.71096e-05	0.000413226
HUERSP3B_11p12	45.8866	51.1058	92.4946	70.4576	-1.01684	9.76272e-05	0.000414992
ERVLE_7q22.1c	174.064	80.5641	114.556	59.0576	0.619299	9.7892e-05	0.000415682
HERVH_8p23.1d	9.76735	22.947	28.3114	34.8833	-0.948678	9.84943e-05	0.000417802
HERVEA_1q31.1	25.2612	75.1276	2.99138	8.61625	0.841968	9.9008e-05	0.000419541
MER4_7p11.2f	568.522	2616.35	7.48175	15.4043	1.3996	9.91124e-05	0.000419545
MER4_1q21.2	106.723	139.632	50.5336	43.5739	0.930559	9.9697e-05	0.000421579
ERV316A3_6q13b	58.3968	43.1618	29.7077	23.2108	0.80719	0.000100957	0.00042646
HUERSP3_1q23.3	19.0487	49.6188	1.08598	4.92922	0.770635	0.000104126	0.000439389
HERVH_10p12.31	40.1304	50.9629	74.9391	70.4915	-1.02856	0.00010449	0.000440469
HML1_2p11.2	34.4571	54.0182	57.806	54.334	-0.966492	0.000106165	0.000447061
ERVLE_5q11.1	14.1971	26.7744	1.08046	3.74676	0.750658	0.000106764	0.000449117
ERVLE_5q31.1d	8.44479	11.5022	23.8255	25.1029	-0.784753	0.00010875	0.000456997
HERVL_6q27g	32.4197	45.7241	10.2078	14.9848	0.885579	0.000111257	0.000467049
ERVLE_7p22.1a	34.8301	40.1215	13.9732	18.1024	0.883272	0.00011193	0.00046939
HARLEQUIN_11q21	15.3324	21.3784	4.38031	10.517	0.770663	0.000113252	0.000474441
ERV316A3_5p15.32a	31.5572	95.8469	0.815159	4.40555	0.858347	0.000114537	0.000479326
HERVK14C_15q21.1	18.5184	46.6163	44.1084	55.989	-0.972737	0.000115569	0.000483149
HERVL_5q14.3d	11.5355	26.557	0	0	0.698018	0.000117432	0.000490428
MER4_7q21.12	12.7317	20.5964	3.17772	7.64738	0.646269	0.00012258	0.000511404
HARLEQUIN_6p21.33	1464.89	2084.62	1800.33	1231.58	-1.18547	0.000123935	0.000516523
HERVH_5q22.1	16.8967	42.6534	43.3438	53.571	-0.998397	0.000124529	0.000518465
ERVLE_2q12.3e	17.8301	37.5557	1.91087	5.08014	0.765963	0.00012701	0.000528252
ERVLE_5q22.2b	12.0123	19.1253	2.60823	7.11561	0.685825	0.000127591	0.000530124
HERVH_3q22.1e	26.2639	56.0889	3.71094	7.75305	0.858204	0.000128366	0.000532798
HML3_15q11.2	119.909	292.393	4.97875	12.4373	1.23394	0.000129602	0.000537377
MER4_14q21.1a	25.9892	27.1636	50.3006	41.5849	-0.878532	0.000130206	0.000539329
HERVL_4q35.2	4.32763	10.4398	12.669	16.3902	-0.666518	0.000130375	0.00053948
ERV316A3_15q26.3a	9.8094	14.8312	21.0568	17.7764	-0.714299	0.000132982	0.000549703
MER101_15q12	10.0455	15.0122	30.6	38.4114	-0.855364	0.000133435	0.000551013
PRIMA41_19p12c	6.00957	10.6965	19.777	26.356	-0.764536	0.000134909	0.000556532
HERVH_11q13.3a	4.02595	10.4906	13.741	19.9983	-0.727324	0.000138418	0.00057043
PRIMA4_4p16.3	305.672	147.276	210.501	79.8181	0.490478	0.000140379	0.000577921
HERVL_9p21.3a	40.9327	35.755	16.8478	15.1201	0.836135	0.000146836	0.000603892
HERVL74_19q13.11b	41.6674	30.5328	72.869	45.754	-0.767644	0.000150413	0.000617975
ERVLE_2p22.1b	32.9664	28.9112	54.658	33.9586	-0.775974	0.000155815	0.000639519
ERVLB4_9q22.2b	35.1524	96.4452	5.71736	9.39486	0.888088	0.000156788	0.000642865
ERVLE_5q31.3e	3.7046	11.3271	12.7884	17.815	-0.69593	0.000157958	0.000647005
HERVW_5q12.1	20.5663	39.8866	3.16182	6.27301	0.767306	0.000159367	0.000652118
MER101_2q36.1	3.21874	10.2927	12.33	17.2897	-0.699472	0.000162409	0.000663892
ERVLE_12p13.1b	20.5971	33.1831	4.81436	14.7955	0.85223	0.00016383	0.000669026
ERV316A3_Xq28i	20.4468	29.9414	4.91371	9.76709	0.778094	0.00016689	0.000680836
MER101_19q13.2c	78.7931	282.658	13.8732	21.6215	1.03892	0.000167376	0.000682134
HML1_1q23.3	15.2489	39.6189	0.922139	3.75902	0.707276	0.000169466	0.000689957
HERVH_2p14c	11.2295	18.3566	2.07232	6.86035	0.669553	0.000169954	0.000690645
HERV4_1q22b	3367.62	1715.95	2434.16	707.303	0.397187	0.000170023	0.000690645
HERVH_20p13a	1.55639	8.19487	11.4475	22.2439	-0.683809	0.000170152	0.000690645
HERVH_12p13.2a	498.625	2122.67	137.314	96.0177	-1.41878	0.000170465	0.000690645
ERVLB4_3p14.2	115.045	208.112	27.9261	33.8725	1.16176	0.000170488	0.000690645
HERVH_1q41g	977.563	1303.74	139.295	153.696	1.97675	0.000170709	0.000690852
LTR19_9q34.11	15.0896	39.5402	1.19422	4.17523	0.726668	0.000172706	0.000698236
ERVLE_7q21.2	57.1217	41.5034	89.2688	52.6359	-0.736115	0.000174843	0.000705757
ERV316A3_3q12.1c	2.99082	6.92872	14.8801	23.3705	-0.712927	0.000174915	0.000705757
MER4_7p14.3b	320.593	160.302	211.23	115.144	0.598905	0.000175891	0.000708989
ERVLE_6p22.1b	14.4753	23.8587	3.04935	7.81604	0.722981	0.000176532	0.000710865
HERVFH19_13q34	16.8175	21.2785	35.1849	34.1578	-0.829687	0.000177485	0.000713995
ERVL_13q21.1b	2.1422	5.76879	10.2088	14.729	-0.634455	0.000178117	0.000715478
LTR19_1q24.3	22.6601	54.9151	1.89839	5.70337	0.827876	0.000178207	0.000715478
HERVIP10F_13q34	33.2958	150.855	2.7532	10.1664	0.838169	0.000181617	0.000728446
ERVLE_11q24.3e	27.723	72.1774	2.42638	6.76542	0.843798	0.000182846	0.00073265
ERV316A3_12p11.23a	18.434	28.5498	32.778	27.4829	-0.835008	0.000183257	0.000733573
HERV3_19q13.42b	565.562	364.79	360.447	145.398	0.528956	0.000184666	0.00073848
HUERSP1_14q23.1	70.9549	235.018	50.5632	40.3465	-1.02291	0.000187853	0.000750485
HERVL_5q14.3b	35.7593	86.4467	1.72651	4.76542	0.87733	0.000189878	0.00075783
HERVL18_4p15.2a	72.3456	230.018	1.34204	5.03545	1.0152	0.00019753	0.000787591
MER41_11p15.5b	33.8236	82.2065	1.56988	5.96275	0.879066	0.000201141	0.000801202
HML2_8p22	445.525	1716.57	18.4881	38.4559	1.3948	0.000202795	0.000806995
HML6_19p13.2b	35.7475	44.7149	62.2085	47.9735	-0.833696	0.000205875	0.00081845
HML1_19q13.43	5045.57	1668.6	3935	1165.99	0.342756	0.000206097	0.000818527
ERV316A3_1p36.22b	10.3876	33.1331	32.7952	63.6259	-0.91359	0.0002067	0.000820117
HUERSP3B_Xq13.2b	238.93	160.126	376.134	233.75	-0.690525	0.000208251	0.000825467
LTR19_1p12	13.7882	36.2662	23.2843	27.636	-0.841917	0.000210839	0.000834905
HUERSP2_19q13.2	772.243	749.141	393.255	275.498	0.727247	0.000215374	0.00085203
ERVLB4_3q25.31a	242.216	211.446	302.982	122.174	-0.692251	0.000216758	0.00085667
MER4B_7q21.11b	9.36241	13.7802	22.3901	21.7463	-0.754144	0.000217979	0.000860658
ERV316A3_21q22.3d	18.8985	19.6687	7.80907	10.6264	0.666825	0.000218836	0.000863199
ERV316A3_5p15.2e	154.13	797.162	0	0	1.03544	0.000219832	0.000866283
MER4_4p12c	18.5872	24.1697	5.70586	10.1998	0.721798	0.000221035	0.000869486
HERVH_12p13.32	1281.08	2206.77	1037.98	757.211	-1.43976	0.000221074	0.000869486
HERVW_21q21.1	138.667	490.366	0.538568	3.0493	1.08835	0.000222967	0.000876081
MER41_3q26.1a	20.5117	24.7008	36.7672	29.0572	-0.77486	0.000223277	0.000876448
HERVH_19q13.32c	33.5775	80.8619	1.76309	4.80332	0.853814	0.000223744	0.000877434
ERV316A3_7p15.3a	4.89941	10.9751	12.4601	14.4682	-0.633181	0.00022746	0.000891143
ERVLE_2q24.2c	229.547	357.646	47.3521	54.5428	1.27576	0.000228716	0.000895195
HERV9_10p13	45.1706	44.1415	74.8589	47.5917	-0.842138	0.000229618	0.000897859
MER61_Xq21.31a	574.714	2355.77	4.08396	11.0029	1.38215	0.000231733	0.000905254
ERVLE_14q32.2a	26.2862	119.204	0	0	0.746228	0.000233782	0.000912039
HML3_Xq21.1a	128.317	380.53	18.1875	35.1116	1.17493	0.00023392	0.000912039
MER4_7p21.1	18.9788	24.7449	5.30755	10.6241	0.765194	0.000235348	0.000916728
LTR57_5p12a	99.2812	148.168	27.5277	27.0547	1.03721	0.000236159	0.000919
HML1_1p31.3	19.6649	22.6246	39.8679	32.7168	-0.831948	0.000240124	0.000933533
HERVL40_4q31.3b	182.496	111.372	259.474	129.738	-0.630396	0.000240789	0.000935222
HERVH_10p11.21	134.393	84.4117	209.341	103.591	-0.698904	0.000241738	0.00093801
ERVLE_3q26.1a	15.3424	38.4476	0.305011	2.3229	0.731993	0.000245116	0.000950207
HARLEQUIN_4q13.2a	44.0512	73.8092	9.34796	20.1449	0.998816	0.000246117	0.000953175
ERVLE_2q12.3c	32.9604	82.2075	4.18148	9.9473	0.897605	0.000249443	0.000965133
MER4_14q12b	118.27	250.211	120.357	103.528	-1.15783	0.000254585	0.000984089
MER4_1q42.13	11.5347	17.5547	2.4226	5.91846	0.64706	0.000256149	0.00098919
ERVLE_5q22.3e	73.1874	57.1069	107.925	47.9206	-0.693699	0.000256523	0.000989691
ERVLE_20q13.12b	108.514	61.2696	69.5867	36.3746	0.599418	0.000260431	0.00100381
HERVH_18q12.2a	25.9004	58.2694	3.38756	8.44229	0.832036	0.000264804	0.0010197
ERVLE_9q34.2	37.6652	48.6158	15.3154	24.2413	0.858113	0.000268447	0.00103274
HERVH_3q25.1	25.7186	28.8617	10.2884	13.2755	0.748829	0.000271652	0.00104408
ERV316A3_8q24.22c	2.56925	13.8044	10.7221	17.0268	-0.670444	0.000272284	0.00104552
ERVLE_22q13.31e	10.3492	25.5158	0	0	0.614141	0.000275944	0.00105857
HERV9_3p24.3	75.2464	96.3212	29.4184	43.4029	1.08823	0.00027711	0.00106204
HERV4_12p11.21	55.2221	50.4412	31.8502	35.8016	0.745799	0.000277521	0.0010626
ERV316A3_2q31.2	8.05527	10.6195	18.3804	16.7148	-0.662275	0.000278622	0.00106487
PABLA_6q27b	25.2605	34.2229	50.9346	45.965	-0.905338	0.000278817	0.00106487
ERVLB4_7q22.3	46.5116	154.793	2.23488	7.27812	0.914732	0.000279103	0.00106487
HERVH_22q12.1	63.5272	114.148	70.8131	50.5851	-0.973143	0.000279165	0.00106487
HERVL_3p24.3b	17.804	46.1825	1.06275	3.5299	0.695796	0.000283079	0.00107879
HML2_6p21.1	13.7443	20.9025	27.3311	24.6524	-0.786912	0.000285599	0.00108737
ERV316A3_3q27.3c	10.9797	28.1879	0.649578	2.82948	0.636791	0.000290917	0.00110658
MER4_1p12b	16.6217	64.8935	38.0839	64.6829	-0.956273	0.000292393	0.00111115
ERVLE_4q28.1b	17.2779	42.61	26.8799	26.0967	-0.829783	0.000293094	0.00111277
HERVH_2q35a	11.6874	20.8876	1.09521	3.993	0.675074	0.00030063	0.00114031
HERVW_19p12d	15.4453	21.0399	33.9936	31.7104	-0.818533	0.000304553	0.00115411
MER41_6p23	68.2304	74.2619	33.8469	28.4545	0.828888	0.000305238	0.00115563
HERVH_2q37.3	2.58413	6.83894	23.9832	46.6567	-0.807145	0.000306047	0.00115761
HERVH48_7q22.1	1287.44	3693.81	43.6537	38.6331	1.53878	0.000309979	0.00117022
MER4_2q37.3b	10.0768	19.243	1.23741	4.13468	0.611143	0.00031024	0.00117022
HERVIP10F_9q13	336.513	1189.94	10.5905	23.4526	1.37374	0.000310466	0.00117022
MER41_2p11.2	21.1334	33.3122	39.0192	41.8734	-0.837893	0.000310537	0.00117022
HERVH_5q23.2e	33.5374	143.803	4.58855	13.2336	0.798432	0.000318672	0.00119976
HERVW_1p12b	2344.16	1670.35	1431.23	501.137	0.516314	0.000319152	0.00120045
HUERSP2_7q31.1	1.66308	5.08984	8.48685	13.3318	-0.578208	0.000320385	0.00120397
MER101_8p21.3	35.4566	33.2269	60.4573	43.652	-0.782552	0.000323876	0.00121596
HERVFC2_11p15.4	886.639	3348.78	5.64804	19.7227	1.41364	0.000326519	0.00122475
HML4_10p15.1	97.8773	248.579	9.11958	12.9672	1.06236	0.000330208	0.00123744
ERVLE_4q32.1f	16.3016	25.6624	3.31063	7.69603	0.755408	0.000335573	0.00125638
ERVLE_13q33.3d	12.4742	32.8519	23.2887	28.1425	-0.888206	0.000338107	0.0012647
HERVL_20p13	106.757	64.3006	62.9521	43.7509	0.754482	0.000339623	0.0012692
ERV316A3_6p21.2b	28.4338	40.7885	51.2648	45.8924	-0.894671	0.000339974	0.00126934
ERV316A3_2q33.1h	1.37827	3.52852	9.60632	15.9054	-0.588846	0.000342037	0.00127587
ERVLB4_16p13.3a	1541.19	1146.73	830.024	298.802	0.587089	0.000345171	0.00128637
HERVFRD_7p13	8.8372	15.1905	20.4868	23.3968	-0.698504	0.000346112	0.0012887
LTR25_11q24.3b	34.3093	83.917	4.35183	8.68001	0.88208	0.000347093	0.00129116
ERV316A3_11q12.3	12.3759	17.4327	2.93125	6.31617	0.638235	0.000347995	0.00129333
HERVFRD_7q21.3	141.327	137.421	179.959	94.4904	-0.853839	0.000349509	0.00129753
ERV316A3_18p11.32c	12.9705	25.3888	1.32569	4.92198	0.693502	0.000349766	0.00129753
ERVLE_2q11.2c	8.4705	10.8096	21.3939	21.7811	-0.70532	0.000353887	0.00131161
ERVLB4_3q22.1a	42.2641	42.0009	20.2184	23.3027	0.827684	0.000357797	0.0013249
HUERSP3_5q21.2	16.4046	42.1699	0	0	0.691971	0.000358346	0.00132572
MER61_8q23.1a	24.2134	26.1893	41.691	36.0966	-0.736011	0.000361859	0.00133684
HUERSP3B_9p13.3b	10.5647	16.5445	22.4569	23.2231	-0.718153	0.000362013	0.00133684
HML3_3q13.33	9.68854	21.5934	0.50171	2.30406	0.58829	0.000364454	0.00134463
ERVLE_12q14.3a	10.9416	21.0893	24.9514	27.7592	-0.807031	0.00036763	0.00135511
HERVH_2p16.1c	106.491	100.342	162.11	106.746	-0.848971	0.00037203	0.00136913
HERVH_Xp11.21	11.5048	21.0087	24.9115	23.8445	-0.766231	0.000372108	0.00136913
ERVLE_6q22.31b	30.0213	27.0511	13.1515	13.6185	0.756061	0.000374072	0.00137511
MER4_2q37.3a	13.7371	24.3952	2.84335	7.01986	0.641684	0.000378715	0.00139091
HERVL_1p21.3b	37.2929	38.2035	16.8595	21.1422	0.852441	0.00037915	0.00139125
ERVLE_16p12.1b	61.4465	39.9632	32.8012	22.7289	0.736676	0.000379664	0.00139187
ERV316A3_6p25.1c	13.1995	17.7199	4.01011	8.44084	0.628935	0.000383159	0.00140342
HERVL_15q26.2b	4.86483	12.7045	12.6243	16.8349	-0.671409	0.000384068	0.00140476
ERVL_10p14	14.6798	15.4001	5.54321	9.98614	0.667931	0.000384498	0.00140476
HERVE_12q24.32	22.5381	98.2167	0.535451	2.86803	0.696463	0.000384566	0.00140476
HERVL18_9q21.13	104.244	218.17	17.7394	28.2831	1.11471	0.000386652	0.00141111
HERVH_22q13.1b	26.6885	40.7776	8.37001	21.1891	0.824653	0.000391472	0.00142741
HERVH_18q12.2c	22.33	47.2946	4.80621	9.50994	0.726217	0.000395134	0.00143935
HERVE_9q34.3	908.006	1713.95	721.432	267.92	-1.07572	0.000395458	0.00143935
ERVLB4_1p36.12b	17.6453	22.1236	30.4767	22.5088	-0.735222	0.000397751	0.0014464
ERVLE_11p15.5a	32.7207	48.4121	10.6019	21.6143	0.844792	0.000403529	0.0014661
HERVH_4q13.3	65.8545	57.842	32.3237	30.2106	0.878248	0.00040416	0.00146707
MER4B_7q33a	12.1445	24.7647	1.67957	4.40827	0.617005	0.000407943	0.00147941
ERVLE_3p21.31d	12.7654	15.2125	4.14477	8.94338	0.63659	0.000408289	0.00147941
ERVLB4_2q11.2	6.0182	17.3879	19.925	39.0296	-0.759131	0.00041273	0.00149416
HERVH_2p11.2d	16.3062	32.2935	1.69903	7.17117	0.722499	0.000414115	0.00149749
HUERSP3B_3q13.11	21.53	51.0081	3.8421	10.3622	0.754782	0.000414389	0.00149749
HERVH_14q22.1a	35.0379	60.044	83.7018	124.781	-1.08495	0.000416143	0.00150249
ERVLE_15q24.3d	17.7904	17.6632	37.384	31.2565	-0.781703	0.000416564	0.00150267
MER4B_3p21.2a	19.4385	37.6403	3.72054	7.88485	0.70978	0.000419134	0.0015106
ERV316A3_13q13.3g	2.39185	7.17982	8.52723	11.3809	-0.579684	0.000420389	0.00151377
HERVH_20p13b	3.54018	9.1613	12.5832	16.9561	-0.629275	0.00042285	0.00152129
HERVE_5q14.3b	17.4266	66.4883	0	0	0.656651	0.000423499	0.00152227
MER61_5q32	27.9374	69.7051	1.04305	4.33988	0.803408	0.000424185	0.00152338
HERVH_1q42.13b	13.9217	26.872	2.89362	7.27174	0.668515	0.000425139	0.00152545
HML3_7p13	149.82	774.917	5.15538	11.5854	1.02584	0.000434211	0.00155663
HERVH_3q26.1b	11.4342	28.0167	0.304337	1.64442	0.627682	0.000440278	0.00157698
LTR19_12p13.31	22.5371	40.6029	51.2348	61.2039	-0.955544	0.000441791	0.001581
HUERSP1_8q21.13	32.6398	101.689	0	0	0.799584	0.000447612	0.00159991
HERVFRD_3p21.31	39.9419	38.6418	20.0095	23.1014	0.787547	0.000447883	0.00159991
HERVH_3p22.3a	20.0997	25.8031	7.61901	15.1082	0.762703	0.000448434	0.00159991
MER101_15q15.2	74.4489	45.9656	40.6252	27.033	0.717415	0.000448655	0.00159991
HERVI_9q22.1	45.846	229.594	1.84006	8.08581	0.803665	0.000458255	0.00163271
HUERSP3B_1q32.2	9.69087	17.2246	17.888	15.4339	-0.693516	0.000460213	0.00163825
ERV316A3_3p21.31c	39.0099	58.0631	50.3729	34.3296	-0.901813	0.000461577	0.00164166
ERV316A3_1p32.1c	11.3385	27.7986	0.183172	1.39499	0.614299	0.000462161	0.00164229
ERVL_8p23.1	5.29088	10.5347	13.2178	14.502	-0.631132	0.000464614	0.00164956
ERVLB4_2q13c	5629.02	4401.14	2627.56	1105.43	0.840185	0.000465117	0.0016499
HERVL_2q37.1	167.8	341.589	35.6261	37.913	1.06177	0.000466377	0.00165292
MER41_15q21.2a	5.97829	10.21	15.5393	16.7356	-0.65886	0.000466835	0.0016531
HERVE_20p11.21b	21970.8	20691.7	26705.1	16409.9	-0.734942	0.000471773	0.00166913
HERVW_Xq22.3c	409.585	381.412	515.366	208.778	-0.632639	0.000472589	0.00167056
MER4B_1p36.33	327.536	214.518	189.049	104.155	0.676253	0.000477889	0.00168782
MER41_5q31.3a	25.79	24.9903	59.9464	58.0056	-0.850532	0.000484225	0.00170871
HERVIP10FH_6q26a	118.526	484.416	2.97996	8.47236	0.974763	0.000486224	0.00171427
ERVLE_8q24.22b	519.317	591.243	798.138	697.847	-0.852211	0.000488987	0.00172251
PABLB_14q11.2b	17.3192	29.8638	3.47448	7.63653	0.683235	0.000489625	0.00172326
PRIMA4_12p11.21b	374.34	270.87	233.634	106.506	0.563986	0.000492054	0.00172887
PABLB_14q11.2c	41.0129	61.464	9.7162	15.1403	0.884162	0.000492072	0.00172887
HERVH_1q31.3	42.1278	83.9116	6.24338	11.5806	0.874452	0.000492869	0.00173017
HERVW_13q21.1	69.2745	295.092	0	0	0.858379	0.000493553	0.00173107
HERVEA_19p13.11	2208.18	1446.46	1433.2	562.871	0.509674	0.000496747	0.00174076
HML3_6q21b	21.2228	45.528	49.9608	77.8325	-0.859752	0.000502495	0.00175938
HERVL18_2p12	11.8124	31.4604	0	0	0.611001	0.000503122	0.00176006
HERVH_3p14.3b	6.93699	14.1495	30.9344	62.6086	-0.826301	0.000515368	0.00180134
HERVE_11q13.4d	85.2876	93.8662	41.7167	36.0939	0.814893	0.000518312	0.00181007
MER61_17p13.1	23.6611	23.9465	47.8125	56.1655	-0.78734	0.000520367	0.00181568
ERVLE_1q32.1e	22.5046	31.5033	6.55283	15.2734	0.790547	0.000524325	0.00182792
HERVH_Xq22.2b	16.517	20.4581	30.9011	26.4023	-0.737712	0.000528795	0.00184192
HERVEA_19p13.2	38.1497	78.2627	58.7149	47.7083	-0.894144	0.000531268	0.00184894
HUERSP3B_22q12.1	3.41532	8.66299	11.1004	16.1796	-0.593388	0.000535678	0.00186269
ERVLE_6q14.1m	28.3713	26.2115	48.0006	33.2227	-0.734253	0.000540499	0.00187784
HERVIP10F_3p25.3	97.8604	124.974	200.378	239.882	-0.925084	0.000541843	0.0018809
HERVL18_4p15.2b	90.5291	63.0894	134.193	68.8356	-0.629346	0.000543731	0.00188583
HARLEQUIN_20p12.1	28.6322	59.1989	7.58243	13.2289	0.754014	0.000548742	0.00190159
ERV316A3_5p14.1b	23.1278	69.6128	0.175678	1.33792	0.711103	0.000549966	0.0019042
ERVLE_8q24.11	22.9159	23.9386	10.9313	14.9222	0.688195	0.000553325	0.00191419
HERVW_14q21.2	77.5887	50.5934	44.2654	31.1034	0.690489	0.000554361	0.00191614
ERVLE_7p22.1b	10.0426	18.9973	1.75232	5.18189	0.589016	0.00057067	0.00197083
HERVH_9q31.1	94.6529	73.3104	142.472	87.7226	-0.745845	0.000596764	0.00205919
ERVL_11p14.3	89.6847	106.854	158.845	193.949	-0.843699	0.000606721	0.00209007
HERVEA_12p13.31	515.989	404.587	236.199	244.1	0.895107	0.000606745	0.00209007
MER4_20q11.21	2.75478	6.76411	10.1418	16.5092	-0.569395	0.000607523	0.00209097
HERVFC1_11p15.4	86.4711	252.023	0.857087	3.21044	0.960584	0.000608241	0.00209167
HERVL_12p12.1c	5.55798	20.751	15.2699	26.3609	-0.665275	0.000624117	0.00214444
HERVIP10F_7p14.1	12.3821	18.1678	4.01853	8.69204	0.607297	0.000629741	0.00216193
HERVL40_12p13.2a	4.20556	10.359	11.8771	15.1106	-0.628456	0.000634627	0.00217686
ERVLE_12q22	9.1373	15.1182	2.36451	6.92196	0.585512	0.000635358	0.00217752
HERVH_2q31.1c	12.0838	17.714	3.08511	6.38754	0.608095	0.000637261	0.0021822
HERVH_12q21.32c	47.4064	131.61	55.0381	56.7387	-0.998455	0.000641572	0.00219431
HARLEQUIN_4q32.1	58.7101	59.8492	28.6857	27.7185	0.780679	0.000641879	0.00219431
HERVL40_5q11.2	18.8315	18.3856	39.1703	35.6103	-0.741911	0.000643666	0.00219856
HERVH_11q21d	10.3002	21.6563	1.25766	4.79846	0.592828	0.000647581	0.00221007
PRIMA41_4q13.3	7952.73	5350.67	5332.45	3659.28	0.530614	0.000651446	0.00222139
ERVLE_20q13.12c	72.7771	128.447	18.2325	30.1234	0.947889	0.000656397	0.00223639
MER4_7q31.1a	16.4019	43.895	0.564834	3.14532	0.676489	0.000662041	0.00225372
MER61_4q21.1a	319.51	251.237	128.782	95.2883	0.980973	0.000663	0.00225509
ERVLE_2q31.1b	20.5649	20.5368	39.6997	32.8407	-0.723586	0.00066623	0.00226238
ERV316A3_6p25.3a	15.1233	20.8013	6.15705	11.6848	0.61846	0.00066626	0.00226238
MER41_6q14.1a	17.1357	51.6138	1.06941	4.0436	0.661674	0.00066869	0.00226527
MER4_7q33a	13.8968	29.3395	1.15988	3.90325	0.640653	0.000668796	0.00226527
HERVL_4q13.2b	14.6236	31.251	1.31715	6.74578	0.680004	0.000669105	0.00226527
HML4_3q26.2	4.08509	12.7802	13.1801	18.3345	-0.684261	0.000669349	0.00226527
ERVLE_1p35.1a	28.5761	34.2913	12.2086	16.1805	0.720017	0.000673448	0.00227724
ERV316A3_6p22.1k	115.913	147.566	169.178	134.279	-0.929011	0.000684549	0.00231285
ERV316A3_11p15.4g	4.04027	8.27001	12.1735	14.0354	-0.61789	0.00069643	0.00235103
ERV316A3_8q11.23b	16.352	31.4174	4.70524	17.1116	0.663691	0.000712231	0.00240115
PRIMA41_14q11.2	26.6268	47.7786	5.04564	10.3696	0.779072	0.000712463	0.00240115
ERVL_2q24.1a	11.6825	21.5042	1.81832	6.46994	0.635296	0.000715949	0.0024109
ERVLE_6p21.2a	2.17891	5.13224	9.91732	15.678	-0.54726	0.000724576	0.00243792
HERVL_Xq22.3b	317.576	137.647	434.277	165.284	-0.448155	0.000728563	0.0024493
HML6_19q13.41f	427.945	466.968	514.246	283.039	-0.763781	0.000732619	0.00246089
HML2_9q34.11	66.1612	58.5023	37.1674	31.9813	0.746147	0.000734319	0.00246456
HERVK11_19p12b	27.2236	26.8294	51.7074	44.3428	-0.797968	0.000735068	0.00246503
PABLA_13q34	6.50231	12.1952	18.0705	22.482	-0.657202	0.00074305	0.00248974
HERVH_1q42.2e	281.641	532.264	52.157	55.8428	1.25919	0.000751076	0.00251455
MER41_6p21.32	19.8136	22.5055	7.47259	11.8232	0.673174	0.000755095	0.00252592
HERVH_1p31.3d	585.885	2224.28	141.657	860.683	1.58292	0.000763591	0.00255223
HUERSP3_2p25.2	110.35	107.162	152.312	103.012	-0.751939	0.000773047	0.00258171
MER4_11q12.2	453.753	226.546	564.763	183.702	-0.394366	0.000795914	0.00265589
HERVL18_6q13	7.47655	22.5386	26.5834	48.8942	-0.797942	0.000805024	0.00268408
MER61_3p23	19.6741	46.2189	2.50538	7.79613	0.7303	0.000812019	0.00270517
ERVLE_4p16.1b	80.159	108.48	30.4283	28.2443	0.82414	0.000820424	0.00272889
HML5_1q22	711.671	781.794	1752.5	3133.82	-0.92746	0.000820485	0.00272889
LTR23_4p16.3a	9.39767	14.6524	2.31025	8.29364	0.584478	0.000822276	0.0027326
ERVL_2p15	1.83189	5.24748	9.4575	15.4874	-0.551391	0.000827545	0.00274786
PRIMA41_20p11.22	9.35278	16.1219	2.00968	7.2436	0.570791	0.000843081	0.00279715
HERVH_20q12a	1.99963	7.68755	11.1525	19.8687	-0.63299	0.000852128	0.00282485
HERVL18_7p21.3	114.324	799.296	2.79696	12.7014	0.738548	0.000853116	0.00282582
HERVE_4q31.22	11.8453	16.1012	3.81199	9.35367	0.61891	0.000854364	0.00282764
ERVLE_2q37.3e	15.9531	31.333	29.6137	37.7698	-0.815098	0.000861922	0.00285032
HERVE_10p13b	17.2773	39.3982	2.37114	7.31822	0.692573	0.000863205	0.00285224
HERVL_6p12.3a	47.1589	278.199	0.423305	2.28057	0.708264	0.000866563	0.002861
HERVH_16p12.3	71.571	128.15	86.4031	66.638	-0.87721	0.000868224	0.00286415
ERVLE_3q25.1	15.6684	47.1165	0.922682	4.11367	0.627416	0.000878884	0.00289696
HERVH_11q13.4b	5.51992	11.8047	20.9632	32.4984	-0.716686	0.000881293	0.00290254
MER41_11q23.3	9.31257	13.642	3.04656	8.23256	0.56547	0.000882413	0.00290316
HML6_19p13.2d	388.284	307.417	649.247	307.889	-0.76727	0.000882917	0.00290316
HERV3_11q14.1	50.9034	103.989	13.8663	19.2787	0.849193	0.000889702	0.00292087
HERVH_2q31.1a	21.2054	47.5184	39.8162	42.7577	-0.876945	0.000889745	0.00292087
HERVE_8p12a	81.3797	320.25	5.79014	14.8079	0.921874	0.000898028	0.00294568
HERVIP10F_19p13.2b	185.255	373.851	251.167	293.555	-1.03444	0.000899851	0.00294617
MER4_8q12.1b	5.84879	11.5018	16.5515	23.5779	-0.673818	0.000900192	0.00294617
HARLEQUIN_7q32.1b	18.754	24.9193	8.01488	13.2451	0.700324	0.000900361	0.00294617
HERVH_11q23.3c	29.2847	48.0411	51.8232	53.6327	-0.915528	0.000907221	0.00296607
HERVL66_4p15.2	75.4797	65.9621	37.1322	36.4625	0.794623	0.000907904	0.00296607
MER34B_4q31.3	669.11	620.581	881.919	472.198	-0.689592	0.000919228	0.00300064
HERVL66_19p12b	28.7396	31.3129	45.8938	33.7988	-0.74643	0.000926746	0.00302275
ERV316A3_3p25.2d	5.59732	16.0483	18.6182	30.7584	-0.716131	0.000931475	0.00303572
MER41_1p36.12	6113.84	3119.06	4522.59	1965.54	0.407376	0.000933111	0.00303861
MER4_17q22	2.68832	6.38199	9.6488	13.4284	-0.559507	0.000943985	0.00307155
HERVFRD_7q36.2	154.471	797.693	33.0869	35.5912	-1.02246	0.000945475	0.00307393
PABLB_10p15.1b	191.685	627.263	1.76136	7.51731	1.05153	0.000957254	0.00310973
MER41_3p22.1b	165.587	84.7299	226.155	95.021	-0.508298	0.000966581	0.00313752
HERVW_6q14.3a	68.7974	137.043	25.6101	90.3058	0.978462	0.000969207	0.00314352
ERVLE_4q25e	4.23152	9.11895	10.4647	11.6755	-0.549906	0.000976436	0.00316443
HERVH_8q24.21a	32.0502	56.9308	51.5404	47.783	-0.888788	0.000980121	0.00317384
MER4B_17p11.2a	38.4719	68.3562	59.8139	56.2399	-0.852414	0.000983506	0.00318226
HERVL_1p31.1d	67.8162	69.2656	100.284	68.4559	-0.737394	0.000984733	0.00318276
HERV9_12q24.32	149.799	846.72	0.844681	3.24223	0.838267	0.000985233	0.00318276
HERVFRD_16q23.1	2994	1757.28	2278.94	1531.26	0.473035	0.000995643	0.00321383
HERVIP10FH_5q32	489.332	2168.28	11.6081	27.5868	1.1046	0.00100416	0.00323873
MER4_3p21.31a	217.162	247.289	259.449	159.091	-0.743515	0.00101128	0.0032591
HERVP71A_10q11.22	31.6991	37.8737	12.7737	18.2548	0.784452	0.00102219	0.00329049
HUERSP3_11q24.2	18.3882	43.4456	4.16373	7.75608	0.640259	0.00102264	0.00329049
HML6_5q13.2e	935.837	645.061	1330.58	840.764	-0.492985	0.00102487	0.00329503
ERVLB4_12q13.13	29.9699	28.9381	15.8426	20.6575	0.70232	0.00103187	0.0033149
HERVL18_8q11.23	15.8744	65.0677	0.157124	1.19662	0.571386	0.00103923	0.00333591
HARLEQUIN_Xq11.1	12.7929	17.7673	27.7221	33.1304	-0.717438	0.00105196	0.00337409
HERVH_4p16.1b	86.3354	222.609	69.8872	53.7476	-1.04803	0.00105498	0.00337968
MER4_4p16.3b	19.2662	30.6429	5.80044	9.56517	0.646452	0.00105537	0.00337968
HERVP71A_5q14.3	29.7173	139.777	0.563711	3.01085	0.681857	0.00105808	0.00338515
MER61_5p14.1	174.844	623.545	8.86323	15.5156	1.07829	0.00105883	0.00338515
HML2_21q21.1	132.102	430.137	1.11574	3.81555	0.976564	0.00105958	0.00338515
MER61_7p14.3a	9.56539	16.8655	29.0129	55.1365	-0.722468	0.00107871	0.00344355
MER4_1q25.1a	49.9783	162.908	7.22451	15.3248	0.825278	0.00108046	0.00344642
ERVLB4_8q21.11b	4.82799	12.0624	10.5233	13.0561	-0.55738	0.00110957	0.00353648
MER34B_11p15.5	86.3456	254.042	4.25446	8.71048	0.951844	0.00111489	0.00355065
ERV316A3_4p12g	8.85208	15.0759	1.90051	5.5198	0.554361	0.00111893	0.00356071
HERVH_3q27.3a	17.6313	42.6301	0.128659	0.97984	0.687361	0.00112362	0.00357283
ERVLE_1q23.1d	3.93554	10.8322	11.1532	16.0649	-0.599285	0.00113319	0.00360045
HERVFC1_7q11.21	1155.51	832.37	761.397	315.187	0.493541	0.0011355	0.00360494
HERVH48_1p22.3	32.1797	31.9258	53.3681	41.2902	-0.744709	0.00113909	0.00361352
ERVLE_4q35.2c	10.3212	27.2796	0.527799	2.49155	0.556309	0.00115335	0.00365589
HERVP71A_6q14.1	30.6552	36.5002	50.7902	48.4187	-0.793091	0.00116422	0.00368746
HML3_3p21.31b	15.459	20.683	5.58773	9.89581	0.633023	0.00116772	0.00369565
ERVLE_2q24.2a	35.6136	49.5501	10.8653	18.2591	0.813886	0.00119224	0.00377031
HUERSP1_5q14.1	67.9338	76.408	30.878	50.6608	0.94442	0.00119517	0.00377391
HERVH_3q21.3d	13.2286	28.462	32.3834	49.1966	-0.809292	0.00119524	0.00377391
HARLEQUIN_1q32.3	223.757	408.675	645.372	825.036	-1.30186	0.00119666	0.00377544
HML3_19q13.31	235.592	653.682	94.5143	64.3934	0.703837	0.00120246	0.0037908
ERV316A3_15q24.1b	115.89	65.9179	78.1182	56.0696	0.637342	0.00120784	0.0038048
MER61_19p12c	304.701	312.473	85.3923	49.2487	0.969527	0.00121645	0.00382892
HERVH_14q12c	74.6895	231.426	54.3363	50.6898	-1.00722	0.00122081	0.00383969
HARLEQUIN_17q21.33	16.6864	21.9511	6.24543	10.1791	0.641305	0.0012233	0.00384453
HERVH_8p23.1c	81.96	135.302	144.333	146.268	-1.15523	0.00124058	0.00389582
HERVIP10F_8p11.22	49.0842	278.24	0.714833	3.108	0.702694	0.00124189	0.0038969
HERV3_3q13.2	14.8961	23.9518	29.4944	33.0867	-0.727468	0.00124523	0.00390434
MER61_2q31.1b	20.3936	26.8709	7.3195	11.7627	0.680342	0.001259	0.00394449
ERV316A3_9p21.1b	41.3887	129.408	0.562247	3.44166	0.78644	0.00126065	0.00394661
HERVIP10FH_6q25.3	12.4893	16.9015	25.6285	25.6116	-0.665482	0.00127343	0.00398352
HERVH_6q14.1e	12.1627	37.1189	16.8941	19.5557	-0.700397	0.00128161	0.00400602
HERVL_12q21.1b	12.0252	56.6956	0	0	0.532823	0.00130793	0.00408513
ERV316A3_4q31.23c	182.303	217.354	203.625	135.359	-0.848033	0.00131252	0.00409632
ERVLB4_5q31.1	12.6326	24.4368	3.63597	8.65679	0.584735	0.00132411	0.00412929
ERVLB4_1p36.11	15.0838	21.8823	28.5502	25.9244	-0.71846	0.00132867	0.00414033
ERV316A3_18q21.1b	9.1666	17.5022	15.9126	15.7921	-0.612093	0.00133716	0.00416159
MER41_Xq24b	27.1963	33.3278	52.9787	47.8917	-0.907514	0.00133817	0.00416159
HERVH_6q25.1	30.6522	106.961	70.1733	153.071	-1.05881	0.00133857	0.00416159
ERVL_1q42.13	11.9138	16.2872	3.70263	7.1895	0.571726	0.00134822	0.00418838
HUERSP3B_1q24.2	109.899	60.9465	73.0476	44.7537	0.612729	0.00135335	0.00420107
HERVH_6p22.3a	39.7018	59.9764	56.4332	42.1901	-0.836104	0.00135772	0.00420927
ERVLB4_1p31.1a	2.45748	6.85326	10.9248	18.6822	-0.575658	0.00135806	0.00420927
HERVH_1p34.3c	71.3959	64.3371	128.877	104.757	-0.799614	0.00139412	0.00431772
HML2_12q14.1	29.3689	64.6219	4.64759	12.5813	0.793036	0.00140232	0.00433979
HUERSP3_11p13	513.641	302.836	762.101	473.392	-0.555475	0.00141194	0.00436624
HERVS71_6p22.1	38.2865	116.072	0.391026	2.97797	0.743134	0.00144499	0.00446504
ERV316A3_2q35f	120.71	79.1785	187.225	107.719	-0.595611	0.00145167	0.00448225
MER101_9q31.1b	2.58282	9.94034	8.89464	15.0766	-0.572098	0.00147308	0.00454491
HERVH_7q34d	16.188	22.7947	5.77685	12.4946	0.63695	0.00147546	0.00454877
ERV316A3_9q34.2a	12.5596	20.3143	22.4096	20.513	-0.644805	0.00150205	0.00462524
HERVIP10F_2q23.3	16.6799	21.279	28.8768	25.555	-0.67041	0.00150255	0.00462524
ERVL_Xp11.21a	19.9331	17.7461	34.3581	23.0934	-0.641007	0.00154756	0.00476019
MER4_5p14.3b	48.2051	165.12	0.437173	2.38436	0.762871	0.00155614	0.00478295
HML2_1p31.1	63.8799	110.939	18.0734	40.315	0.993884	0.00155858	0.00478682
HML3_3q13.11b	68.7405	193.175	6.70722	14.82	0.839158	0.00156735	0.00480666
ERVLB4_7q21.3a	7.52765	12.3537	16.1712	17.6785	-0.561918	0.00156741	0.00480666
HML2_3q12.3	3049.47	2221.46	3895.22	1671.22	-0.503123	0.00158663	0.00486189
ERVLB4_1p34.1	21.4141	24.8323	44.8748	55.2813	-0.703731	0.00158874	0.00486469
HML3_8q11.23a	61.705	86.2888	25.2729	21.623	0.753018	0.00159682	0.00488575
ERVLB4_2q32.1d	10.0135	17.0606	2.42156	6.74349	0.550834	0.00159807	0.00488588
HUERSP2_12p12.3	13.3478	44.5716	0.990693	5.73944	0.604564	0.00161299	0.00492776
HERVIP10FH_2p14	42.826	39.0875	20.7546	20.5086	0.688856	0.00163613	0.00499469
ERV316A3_22q13.31b	82.3025	197.294	18.9185	20.4276	0.82332	0.00165585	0.00505027
HML2_12q24.33	254.544	139.939	355.344	160.513	-0.491151	0.00165683	0.00505027
MER101_3q26.31	29.5587	31.0356	11.751	14.8823	0.707314	0.00166158	0.00506096
ERV316A3_5p14.1e	37.516	101.446	2.1066	5.22851	0.767814	0.00166393	0.00506431
HUERSP1_15q21.1a	23.9397	33.0115	9.34383	26.2614	0.728214	0.00166807	0.00507309
HERV3_1p34.3	50.1557	127.521	80.9066	101.454	-0.948298	0.00167002	0.00507522
HUERSP2_17q12	24.4153	51.0221	60.0964	84.2272	-0.942589	0.00169053	0.00513368
MER4_6q22.1b	122.717	117.825	162.153	90.8786	-0.619562	0.00171163	0.00519386
HERVH_2q33.3a	18.3803	31.5288	46.5927	63.4255	-0.858045	0.00171864	0.00521124
HERV3_4q13.2b	468.463	1175.38	309.775	324.025	-1.44897	0.00172138	0.00521565
HARLEQUIN_4q22.1b	11.5598	33.0871	0.241463	1.83893	0.559548	0.00173078	0.0052402
MER4_2p21	140.573	106.665	191.283	113.579	-0.613366	0.00173364	0.00524495
HERVH_13q13.3b	144.833	142.552	216.185	153.984	-0.85723	0.00174999	0.00529046
HARLEQUIN_5q14.2	4908.06	4413.74	6928.26	4416.51	-0.658453	0.0017528	0.005295
HML3_19p13.2c	282.823	167.677	357.42	129.424	-0.453758	0.0017612	0.00531641
HARLEQUIN_12q13.12	11.8765	50.6019	1.20138	4.69309	0.518656	0.00176939	0.00533716
HERVH_7p15.3b	333.991	633.358	53.7675	42.0379	1.05786	0.00177584	0.00535261
HERVK14C_19q13.2	4.04149	13.8846	11.9759	20.2029	-0.599987	0.00178069	0.00536325
HERVL_18p11.32a	35.239	64.3118	6.26959	12.0353	0.78122	0.00179172	0.00539246
HERVFRD_1q44	21.2425	29.7944	6.8343	10.008	0.661517	0.00179921	0.00541098
HML5_Xq13.1a	27.9998	116.681	155.741	292.681	-1.19334	0.00180368	0.0054204
ERVLB4_10q22.3a	24.3937	33.9453	41.5136	39.9153	-0.741136	0.00181805	0.00545955
HERVK11D_11q14.3	234.86	449.551	42.7762	46.506	1.1156	0.00183253	0.00549895
HERVL_9p24.1b	272.263	1843.75	5.82603	12.0558	0.944473	0.00185109	0.00555054
HERVH_12q13.11c	3.41176	6.71853	17.8901	30.7528	-0.653358	0.00187916	0.00563054
HERVL_2q33.3	25.3668	63.6666	55.2156	88.7899	-0.852396	0.00188702	0.0056499
HERVH_11p15.4h	7.80283	12.0175	17.5622	19.2492	-0.616612	0.00189123	0.00565446
HERVH48_Xp11.21	969.962	448.336	692.388	253.332	0.403032	0.00189133	0.00565446
ERV316A3_12q23.2a	5.57141	10.1407	13.5562	16.0251	-0.561523	0.00192207	0.00574212
HERVH_13q33.3	11839.3	34060.3	1839.14	2885.79	-1.56791	0.00192703	0.00575268
HERVP71A_5q23.3	11.6778	21.4565	2.06399	5.38812	0.571432	0.00192984	0.00575684
HUERSP3_Xp11.21	14.4382	16.6797	26.9481	24.1744	-0.613915	0.00193342	0.00576317
HERVL40_2p23.3a	230.742	198.384	141.039	64.7088	0.496468	0.00193481	0.00576317
HERVFRD_20p12.3	2.64859	6.32735	10.0692	15.0672	-0.527422	0.00193762	0.00576731
HUERSP2_19p12	37.2753	63.5337	66.2111	78.8376	-0.880576	0.00194555	0.00578665
ERVLB4_12p13.31d	3.90011	9.27871	9.02624	10.8014	-0.471793	0.00196863	0.005851
MER4_7p14.3a	1959.54	1079.51	2636.75	1169.36	-0.443454	0.00198144	0.00588477
HML1_Xq24	8.03168	14.6407	18.4765	22.3576	-0.631249	0.00198345	0.00588642
HERVH_4p16.1d	63.002	98.2885	77.6224	49.7953	-0.851436	0.00199719	0.00592285
MER61_12p13.31c	363.122	1827.19	1.43818	6.95546	0.86472	0.00199967	0.00592587
MER4_Yp11.2b	122.436	111	65.12	57.1618	0.904679	0.00200774	0.00594183
MER4_6p12.1	5411.79	18480.6	187.701	754.112	1.93075	0.00200832	0.00594183
HERV3_19q13.42c	314.892	181.723	202.183	84.1473	0.513794	0.00200946	0.00594183
HERVH_4q22.1a	1.76157	5.64804	11.5554	24.4776	-0.560334	0.00201982	0.00596813
MER4_Xq23b	6.44325	16.3431	17.5531	33.109	-0.632772	0.00202461	0.0059779
HML6_16p11.1	195.1	1322.26	1.24917	5.11957	0.752917	0.00202748	0.00598203
HERV9_15q21.1a	14.7008	23.2746	4.34154	10.446	0.629332	0.00206479	0.00608768
HML5_2p13.2	1719.47	620.775	1382.52	297.714	0.269059	0.00206722	0.00609042
HERVH_20p11.23b	4160.29	19647.6	107.296	363.01	1.40776	0.00207092	0.00609688
MER41_4q12a	11.9699	14.3802	24.2953	26.1205	-0.602602	0.00208398	0.00613088
PABLB_11p14.3	2.43087	5.19525	9.94213	16.5216	-0.52706	0.00208641	0.00613356
HERVH_2p12d	18.1603	50.9014	0.692735	3.81913	0.606626	0.00208844	0.00613508
MER4_3p21.2	12.5654	17.0829	5.00254	11.3989	0.579584	0.0020917	0.00614019
HML5_2q14.3	30.9278	34.3591	50.3753	40.6864	-0.706445	0.00209705	0.00615146
MER41_Xq13.3b	20.3018	18.8291	33.8925	28.3216	-0.616455	0.00211685	0.00620342
MER41_Xq21.33b	45.738	185.465	0.407905	3.10651	0.734854	0.00211783	0.00620342
ERV316A3_5q14.3a	148.908	326.338	160.982	126.655	-0.792394	0.00212558	0.00622161
ERVLE_10p12.2a	4.68562	11.9172	13.3649	22.5813	-0.572247	0.00213734	0.00625153
HERVL_2q14.3f	2.44126	5.76248	9.72532	14.7715	-0.527117	0.00216617	0.00633127
MER4_13q32.3b	57.0168	50.619	31.8412	33.0669	0.71195	0.00217825	0.00636199
MER101_1q42.13a	297.983	406.047	107.272	102.302	0.93772	0.00218181	0.00636781
ERV316A3_12p12.3c	124.965	125.519	51.1669	33.7878	0.736387	0.00219253	0.00639449
HERVW_6q22.1	106.599	223.672	31.4198	63.9879	0.974976	0.00219812	0.00640227
HML3_1p36.33	10.0082	23.8089	1.26856	4.26734	0.550411	0.00219836	0.00640227
MER61_1q25.3	19.4932	39.7307	5.41594	11.7587	0.672522	0.002206	0.00641991
MER4_19q13.41b	136.447	76.1789	192.187	93.5736	-0.501142	0.00221174	0.00642873
HERV3_1q42.13	20.2156	21.172	9.03765	14.295	0.663515	0.00221323	0.00642873
HML6_14q12b	20.9896	53.5861	2.21013	6.28504	0.655449	0.00221379	0.00642873
ERVLB4_16q13b	3.25753	6.66756	12.7573	22.3036	-0.535272	0.00221718	0.00643394
HERV3_14q32.33	403.246	404.382	183.401	113.347	0.679635	0.0022208	0.00643985
HERV3_16p13.3	221.032	98.2609	157.362	65.9104	0.463864	0.00222387	0.00644414
HML1_3q26.31b	51.8637	98.5094	15.2965	25.9039	0.848643	0.00223644	0.00647592
HUERSP2_21q22.3	1042.12	3114.63	676.46	459.162	-0.92871	0.0022478	0.00650416
ERVLE_9q21.13c	42.2369	31.1765	69.5175	42.5233	-0.596213	0.00225213	0.00651204
HERVH_9q21.13b	8.042	15.4307	15.9526	18.8011	-0.606539	0.00228352	0.00659811
HML2_10p14	37.6377	36.7445	17.8523	24.7002	0.743475	0.00230397	0.00665116
HERVL_5p15.2b	16.6589	28.5708	5.37741	11.3278	0.633919	0.00230517	0.00665116
HUERSP3_12p13.31	17.507	43.4138	1.59199	5.00711	0.63067	0.00231616	0.00667813
ERVLB4_13q12.12a	100.709	304.704	30.0834	35.7618	0.842261	0.00233875	0.00673846
ERVLE_8p23.1e	28.2872	28.2155	46.1915	33.946	-0.688228	0.0023596	0.00679371
HERVL40_6q26b	17.6681	30.4422	29.404	33.0453	-0.703065	0.0023631	0.00679894
HERVH_1q25.2	76.7816	430.825	42.782	54.4338	-0.920819	0.00239312	0.00688042
LTR23_9q22.33b	159.715	118.405	98.9358	71.4689	0.650145	0.00240441	0.00690799
ERVLB4_Xp21.1e	32.6307	45.7572	44.6532	30.2631	-0.643141	0.00242498	0.00696216
HERVH_18q22.3b	477.857	939.784	187.43	101.916	0.686693	0.0024551	0.00704362
HERVL74_7p21.2a	22.4727	28.4159	9.9375	16.2607	0.686472	0.00246279	0.00706069
MER4_Xq13.1	15.7887	18.6638	6.35155	11.7155	0.602969	0.00247836	0.0071003
ERVLE_5p15.31b	24.618	27.0797	11.8732	15.3066	0.629038	0.00248318	0.00710648
PABLA_19p12a	26.99	29.5645	13.1849	16.4131	0.639193	0.00248402	0.00710648
MER61_13q31.1d	484.867	2752.94	1.63774	5.62748	0.956709	0.00248906	0.00711559
HML5_19p12d	33.0631	93.6033	17.208	125.878	0.811339	0.00249072	0.00711559
HERVL40_2p23.3b	32.9739	33.0049	55.0472	43.761	-0.695771	0.00250898	0.00715795
HERVH_1q42.13a	4.55932	12.494	11.401	15.4431	-0.566664	0.00250908	0.00715795
ERVLE_15q15.1	6.31554	9.52203	18.6371	25.1816	-0.610548	0.00251721	0.00717609
LTR46_16q23.1	49.3436	45.9934	77.0971	53.9776	-0.702026	0.00257346	0.00732971
HERVIP10FH_Xp21.1	204.644	388.332	211.08	113.146	-0.706405	0.00257472	0.00732971
HERVE_2p13.3a	39.4909	97.6544	10.2838	16.3946	0.763188	0.00257768	0.00733298
HERVL66_1q42.12	3987.13	17871.5	32.1072	43.8356	1.53479	0.00257966	0.00733347
ERVLB4_19q13.33a	11.1578	20.4319	1.89169	5.43375	0.559294	0.00258209	0.00733524
MER4B_5q13.3	4.70373	9.66511	12.2947	15.8407	-0.552825	0.00260387	0.00739192
HERVI_12p13.31	1304.9	5846.5	5.13749	12.6276	1.10679	0.00263648	0.00747926
ERV316A3_8q13.2a	4.54208	9.44473	11.9005	15.9613	-0.536252	0.00263885	0.00748075
HERVI_15q25.1	595.782	288.91	430.927	230.42	0.484575	0.00264617	0.00749336
PABLA_19q13.32	11.7847	26.3542	1.41575	4.7918	0.556786	0.002647	0.00749336
HERVL_3q11.2c	51.6308	188.293	1.07031	4.19831	0.751023	0.00265179	0.00750167
HERVH_3q26.32c	649.597	1209.43	147.758	102.11	1.01412	0.00265643	0.00750956
ERVLE_10p15.1c	13.1164	48.3535	0	0	0.545952	0.0026963	0.00761696
ERVLB4_6q27e	980.011	3420.28	6.2914	14.0857	1.16412	0.00270871	0.00764667
ERV316A3_15q26.2c	5.94294	14.1215	11.1134	13.609	-0.540715	0.00272626	0.00769087
HERVL40_22q13.2	46.5776	44.5327	25.9273	25.1245	0.665258	0.00276662	0.00779597
MER4B_15q21.2	6.35214	9.66579	15.1757	17.6764	-0.548916	0.00276737	0.00779597
MER61_6q24.1c	20.616	96.3735	0.229614	1.26873	0.529765	0.00280682	0.00790161
ERVLE_6p25.1a	40.6245	54.0064	14.6117	15.8583	0.701147	0.00281105	0.00790802
HERVL74_4q32.1	8.43796	14.2899	1.7719	5.00646	0.521209	0.0028301	0.00795609
HERVH48_4p15.31	23.1754	71.5432	0.39573	2.25177	0.619964	0.0028479	0.00800059
ERV316A3_8q23.1b	9.85234	22.0958	2.05347	7.73611	0.531908	0.00286929	0.00805509
HERVL_7q11.21b	88.1822	75.4395	52.5233	40.5164	0.645125	0.00287198	0.00805705
HERVH_5q35.1a	172.24	922.229	67.3935	56.8158	-0.913622	0.00288085	0.00807636
PABLA_1q25.1	638.063	495.374	1007.2	583.356	-0.831663	0.00288533	0.00808332
HERVL74_Xq13.2b	5.15603	14.014	11.3641	14.9414	-0.541409	0.00290572	0.00813482
HERVH48_8q21.2	79.6334	71.5938	132.452	133.945	-0.700451	0.00291633	0.00815889
ERVLE_6q25.2a	46.1813	144.644	109.769	201.889	-1.09552	0.00294001	0.00820967
MER101_11q13.2	25.517	40.8972	7.34559	10.3937	0.685076	0.00294038	0.00820967
HERVL_10p13c	38.9101	34.9471	21.5988	20.1289	0.645615	0.00294056	0.00820967
HERVH_3p12.3a	22.9213	41.4017	35.3056	31.8785	-0.744547	0.00294598	0.00821912
HERVH_11q24.2b	12.1087	28.6187	0.800128	3.53785	0.55068	0.00303674	0.0084665
HERVH_12q14.2	12.0946	26.6365	3.4022	8.37838	0.542288	0.00304379	0.00848033
HERVE_2q37.1	10793	13158	10726.9	5144.62	-0.606304	0.00306316	0.00852842
ERVLE_8q24.3j	20.8136	18.2576	34.6739	26.3603	-0.585	0.00308376	0.00857989
ERV316A3_5q31.3c	8.96723	15.6241	19.0641	22.6834	-0.616279	0.0031257	0.00868526
HML3_9q34.13	63.0529	65.965	88.5984	55.2096	-0.626428	0.00312592	0.00868526
HERVH_11q22.2	75.008	237.541	12.6398	24.0413	0.855049	0.00313501	0.00870455
MER101_10q23.33	10.5878	18.2014	18.2292	17.1557	-0.613816	0.00313842	0.00870702
HERVP71A_2q33.1	21.0819	23.7947	39.3055	48.8217	-0.665546	0.00314084	0.00870702
PRIMA41_1q42.13c	12.1803	31.4418	1.06425	4.41783	0.561574	0.00314235	0.00870702
HERVL_6q24.1g	16.5081	47.3704	1.1493	3.98133	0.585522	0.0031749	0.00879119
ERVLE_4q24h	10.238	12.8176	22.7414	26.8604	-0.602222	0.0031975	0.00884772
ERV316A3_8q24.12a	9.43769	18.3378	2.31538	5.49723	0.491145	0.00320217	0.00885459
HERVW_19p12b	3.19544	7.87318	8.37814	11.6694	-0.486945	0.00321685	0.00888661
HERVH_14q24.2c	16.2897	22.6343	31.4082	31.1345	-0.670151	0.00321813	0.00888661
ERV316A3_3q13.31b	37.1308	155.517	3.51996	8.7603	0.661039	0.00322794	0.00890761
MER4_8q12.1a	5.52243	13.637	12.6236	15.1037	-0.580212	0.00323113	0.00891035
ERVLE_5q35.3c	154.176	103.158	95.1532	51.5995	0.562828	0.0032454	0.00894361
HERVL66_17q21.31	440.429	465.16	263.66	101.815	0.452585	0.00324983	0.00894973
HERVH_4q13.2	66.2095	75.3124	30.0541	38.7392	0.79692	0.00333004	0.00916441
HERVL18_2q33.1	12.8416	50.6521	0	0	0.504082	0.00333553	0.00917327
ERVLB4_11p15.5d	44.7117	41.8023	59.3727	39.0977	-0.663424	0.00335976	0.00923365
HERVL18_5q21.3	23.554	51.7314	4.30286	8.86743	0.656206	0.00336833	0.00925093
LTR23_9q22.33a	466.529	330.944	277.585	167.406	0.641745	0.00337968	0.00927581
HERVL_8q24.3a	11.8878	16.4283	26.4708	29.0743	-0.660316	0.00338446	0.00928264
HERVL_10q23.2	9.67362	32.2554	0.816365	3.56302	0.502076	0.00339748	0.00931203
ERV316A3_12p12.2a	16.9066	38.7062	2.62829	6.26055	0.576915	0.00340831	0.00933539
HERVH_17q12	28.3298	59.9751	8.29521	22.3734	0.733565	0.00342943	0.00938691
MER4_16q24.3	614.432	406.556	838.575	526.836	-0.461953	0.00345312	0.00944535
HERVL_6q27e	3.19737	10.8714	9.40216	16.2581	-0.495554	0.0034684	0.00948076
HERVE_3p26.3	147.355	130.777	221.398	150.895	-0.671882	0.00347558	0.00949399
ERVLB4_12q21.2	9.06301	15.1119	15.6493	15.8309	-0.54478	0.00347978	0.00949904
ERVLE_6q22.32	230.093	143.778	276.558	92.7556	-0.391645	0.00354858	0.00968033
HERVFH21_8q11.21	412.837	528.551	363.756	172.873	-0.869332	0.0035669	0.00972378
MER4B_17p11.2c	19.9169	58.2704	0.364911	2.77908	0.587241	0.00358064	0.00975205
HERV3_14q12	3.80336	9.18648	11.2496	21.183	-0.543001	0.00358209	0.00975205
ERV316A3_6p22.1n	1732.97	2380.39	2518.01	2331.53	-0.792179	0.00359669	0.00978523
ERVLB4_Xq21.2	17.1535	50.3771	0	0	0.58243	0.00360285	0.0097954
HERVL74_Xq13.2c	7.75465	13.2162	14.2424	13.8194	-0.545212	0.00364047	0.00988747
HERVL_1p22.2b	20.6521	55.3496	4.5499	9.62948	0.619825	0.0036416	0.00988747
ERVLE_2p11.2b	7.62439	14.7632	15.3426	16.8627	-0.558798	0.00364773	0.00989748
HUERSP2_11q22.1c	19.7491	56.08	30.0438	42.4571	-0.773048	0.00365107	0.00989991
HML6_16p11.2	25.5683	26.8271	12.5665	14.7906	0.612689	0.00366835	0.00994012
HERV30_6q22.31	14.9871	17.7939	27.0796	26.8895	-0.617723	0.00368597	0.00998119
HERV9_10q21.1b	13.721	43.8268	0.543333	2.91866	0.546395	0.00370501	0.0100261
HML3_1p33	23.9769	40.6931	43.2251	53.418	-0.810588	0.00372764	0.0100806
MER41_20q13.12	22.4624	30.0029	9.02667	21.0678	0.636064	0.00374213	0.010113
HML4_16p13.3	3356.71	1635.09	4172.76	1531.91	-0.369623	0.00375184	0.0101325
HERVH_12p12.2a	17.9989	48.4458	0.422694	1.9303	0.596065	0.00376342	0.010157
HUERSP2_14q31.3	84.9734	115.602	121.045	137.473	-0.845555	0.00378202	0.0102004
HERVH_12p12.3b	87.4889	467.527	1.42711	5.29328	0.701648	0.0037894	0.010207
MER4_20p11.23	39.1734	77.2815	14.5373	15.7196	0.643235	0.00378951	0.010207
ERVLB4_4q25a	10.0417	31.7885	0.468315	2.13884	0.483115	0.00380039	0.0102295
HERVL74_19p13.2a	141.031	92.7911	191.234	102.127	-0.539421	0.00381049	0.0102499
HERVE_13q14.11b	1.44849	4.83172	9.67866	22.8472	-0.506018	0.00384415	0.0103335
ERVL_1p34.2	14.0851	17.9302	6.27662	10.15	0.522624	0.00385142	0.0103462
ERV316A3_8q21.13j	19.9249	73.933	0	0	0.569278	0.00387704	0.0104047
ERVLE_9p24.1b	14.2954	22.84	4.17568	6.91465	0.530615	0.00387991	0.0104047
ERVLB4_4q12d	15.9394	21.4499	5.63571	9.33855	0.564086	0.00388088	0.0104047
ERV316A3_12p11.23b	34.5777	36.7463	49.0407	34.0225	-0.613427	0.00390284	0.0104505
MER4_12p12.2a	32.2323	158.65	0.403771	2.30732	0.617356	0.00390314	0.0104505
HERVIP10FH_1p33a	17.1111	17.7057	31.0411	26.3636	-0.595147	0.00402058	0.0107578
HUERSP3B_3q28a	81.5735	78.2258	130.993	123.137	-0.78918	0.00402397	0.0107598
MER4_9q21.12	5.85284	10.3644	17.8618	32.1323	-0.581312	0.00402922	0.0107667
HERVL18_4q23	8.91018	14.2022	2.64042	5.92815	0.471243	0.00407228	0.0108746
HERVH_4q35.2c	65.6973	71.2403	30.7346	32.4694	0.762681	0.00424874	0.0113384
HERVH_17q25.1b	195.245	131.377	279.016	143.911	-0.575721	0.00426737	0.0113806
ERVLB4_1q24.3	8.22541	13.4196	23.1557	34.281	-0.614485	0.00428442	0.0114185
MER61_1q42.2b	10.7626	19.601	4.11134	10.98	0.525931	0.0043074	0.0114722
MER4_15q22.31b	84.6728	65.3766	122.347	80.6474	-0.614832	0.00438473	0.0116705
ERVLE_11q23.3e	25.6047	23.2599	15.1702	23.3056	0.646468	0.00441052	0.0117315
ERVLB4_11p15.5a	14.311	27.9618	2.73006	6.44329	0.577741	0.00443309	0.0117838
ERVLE_1p34.3c	15.6881	18.3503	6.98826	9.03516	0.525865	0.00443881	0.0117912
ERVL_Xp11.21b	4.78039	8.87834	9.65011	10.7439	-0.456914	0.00444597	0.0118025
LTR57_6q24.3	2.05965	8.21139	14.2824	34.1701	-0.540247	0.00446018	0.0118325
ERVLE_4p14d	4.80786	8.83365	15.2684	22.7894	-0.537482	0.00447986	0.0118769
HERVL_11q22.3g	31.6836	109.831	4.58761	10.3596	0.692561	0.00449098	0.0118986
ERVLE_3q26.2	42.9261	52.7915	22.6271	27.5814	0.658632	0.00449756	0.0119082
HERVL_4q31.21b	154.636	93.9613	106.376	69.183	0.514147	0.00451822	0.0119551
MER4B_19q13.42a	235.089	197.6	279.335	146.884	-0.578761	0.00452829	0.011974
HML2_8p23.1c	46.6187	72.6412	96.628	128.859	-0.910659	0.0045457	0.0120122
ERVLE_12p11.21b	91.0966	71.3794	123.629	70.2705	-0.567836	0.00455808	0.012037
MER4_Xq25a	11.7491	32.3882	2.02996	6.08826	0.511794	0.00457207	0.0120661
HERVL_14q22.3b	195.007	396.558	20.2022	30.1221	0.990858	0.00458847	0.0121015
HERVL_2q32.1e	26.5686	25.3249	13.417	14.7133	0.600802	0.00459427	0.0121089
HERVH_5p15.2a	15.0052	34.4636	2.74317	12.4769	0.582099	0.00461049	0.0121387
HERVIP10FH_3p26.1a	75.9884	465.416	0	0	0.621514	0.00461155	0.0121387
HML2_7q34	32.0684	38.7626	41.3565	28.4238	-0.653868	0.00467953	0.0123096
ERV316A3_6p12.3a	16.4578	101.734	0	0	0.467372	0.00469287	0.0123367
HERVH_5q31.1a	95.9821	75.2919	130.817	87.1761	-0.580233	0.00474334	0.0124613
HARLEQUIN_17q21.31	3460.23	1331.14	2785.14	813.666	0.273989	0.0047606	0.0124985
MER4B_1p22.1b	5.28699	10.4388	13.213	16.8648	-0.505297	0.0047999	0.0125935
MER4B_5p15.1	7.68377	17.4055	19.561	28.936	-0.594484	0.00484271	0.0126976
HERVL40_19q13.2	93.6188	67.8703	124.902	56.255	-0.544475	0.00485913	0.0127324
HERVFC1_7q36.2	858.012	4159.66	2.62489	12.8366	0.924987	0.00495025	0.0129628
MER41_4q31.1	169.772	184.264	206.977	89.9734	-0.488914	0.00501025	0.0131115
HERV4_19q13.41	1089.89	539.648	791.485	305.345	0.3839	0.00501576	0.0131174
HERVL40_5q14.3b	12.0496	42.2753	0	0	0.486372	0.00508739	0.0132961
HERVL40_2q33.1	167.775	199.609	67.9479	59.896	0.683357	0.00515589	0.0134665
HUERSP1_7p13	9.01518	16.2981	2.72523	6.80907	0.46534	0.0051741	0.0135053
MER101_Xq23b	34.9725	44.5346	45.3852	32.3958	-0.684319	0.00517814	0.0135072
HERVL_6p22.3a	5.94243	13.6004	11.6219	14.1221	-0.49392	0.00524904	0.013675
LTR19_6q25.3b	1106.43	945.832	707.017	315.169	0.447909	0.00524921	0.013675
HERVH_14q32.12a	579.275	319.705	715.344	290.032	-0.349142	0.00526688	0.0137122
HUERSP3B_2p16.1	5.15265	11.7549	9.85056	12.0858	-0.476392	0.00530162	0.0137918
HUERSP3B_3q26.31a	36.345	46.037	54.0867	50.713	-0.689986	0.00530427	0.0137918
HERVEA_8q11.23b	37.3028	26.3833	26.0614	28.0822	0.586893	0.00531204	0.0138031
ERVLB4_17q25.3b	115.723	69.4011	85.0368	69.6856	0.642007	0.00532873	0.0138372
LTR57_10q21.3	50.9627	44.5564	27.3086	21.842	0.6514	0.00533198	0.0138372
HERVH_8p23.1h	12.327	23.3949	28.7505	38.2475	-0.690818	0.00537323	0.0139353
HML5_19q11	614.157	612.21	325.27	146.483	0.50866	0.00537772	0.013938
ERVLB4_22q11.21a	16.6654	20.6513	6.40355	8.19951	0.519405	0.00538836	0.0139567
MER61_5q23.2a	16.0346	81.2774	1.17831	4.20766	0.478509	0.00542491	0.0140424
HERVH_2p11.2c	30.4351	59.7027	7.49708	17.423	0.704927	0.0055219	0.0142843
HML2_14q32.33	23.5105	42.0635	7.59135	13.6316	0.607135	0.00552603	0.0142859
HML3_1q21.3c	26.1659	44.2061	7.4442	11.5187	0.608604	0.00557345	0.0143993
ERVLE_19q13.33	8.2525	15.0807	16.0703	18.8294	-0.552047	0.00557739	0.0144003
ERVLB4_7q36.3a	59.5571	53.5893	34.9531	29.7924	0.617572	0.00560684	0.0144671
HML3_4q31.3	485.091	488.297	668.955	460.149	-0.633917	0.00562031	0.0144926
ERVLE_19p13.2a	172.529	106.883	237.336	120.197	-0.49175	0.00564035	0.014535
HERVFH19_1p36.23b	7.8935	17.2481	14.4228	16.4727	-0.550999	0.00565312	0.0145587
HERVL_5p13.3b	39.7088	38.7459	53.9819	38.5518	-0.599466	0.00566281	0.0145744
ERVLE_1p36.22	28.7547	27.1308	17.504	17.8404	0.557794	0.00567742	0.0146027
HERVW_1p33d	4.16428	8.9189	11.4065	17.0952	-0.491277	0.00568126	0.0146033
ERVLE_11q22.3l	14.0596	47.2495	2.4564	6.61374	0.510221	0.00569493	0.0146237
MER41_15q24.1	5.87093	14.9549	10.5054	12.3836	-0.491752	0.00569642	0.0146237
HARLEQUIN_7p14.3	310.675	290.617	444.412	386.1	-0.580637	0.00575365	0.014753
HERVH_6p21.2b	176.527	204.57	81.3159	140.24	0.895632	0.00575407	0.014753
MER41_12p13.2	30.9734	55.3567	12.1448	14.5156	0.612921	0.00577046	0.0147857
ERVL_12p13.2	37.4026	39.7951	48.7112	32.6691	-0.576619	0.00582946	0.0149274
HERVIP10FH_10q23.33	38.4907	151.801	1.09225	5.2549	0.639853	0.00584376	0.0149546
MER4_1q44a	46.0212	133.658	5.76051	11.4544	0.729691	0.0058954	0.0150772
ERVLB4_7q34b	8.58069	12.1593	3.43707	8.62628	0.451439	0.0059161	0.0151145
ERV316A3_22q12.3b	53.2721	233.452	0.157124	1.19662	0.645826	0.00591746	0.0151145
MER4B_16q21a	6.10771	23.2559	13.8229	21.8435	-0.531334	0.00592337	0.0151201
ERVLE_4q13.3g	225.307	170.655	278.146	188.063	-0.505431	0.00598785	0.0152697
HERVP71A_2q32.2	404.469	223.79	268.93	128.48	0.48878	0.00599321	0.0152697
HML3_8q11.23c	48.6621	41.136	28.8019	23.823	0.583291	0.0059933	0.0152697
HERVE_7q21.3	908.799	650.067	521.681	172.42	0.489387	0.00601822	0.0153236
LTR25_Yq11.223d	14.2058	37.6561	46.732	70.8708	-0.842167	0.00607988	0.0154706
HUERSP3_11p15.1	1799.4	1810.31	1961.3	1174.38	-0.616467	0.00608359	0.0154706
HERVH_12q23.1	10.2006	19.8525	15.5658	16.0425	-0.542267	0.00609531	0.0154906
ERV316A3_12p12.3b	11.2913	18.8158	3.83557	8.31562	0.499942	0.00623334	0.0158315
ERV316A3_13q32.1b	35.5293	29.8321	20.4719	20.2963	0.568852	0.00624012	0.0158388
ERVLE_2q13	3.02938	7.27243	8.8591	12.5417	-0.482623	0.00625674	0.015871
ERVLE_22q13.2f	161.503	253.131	204.137	171.124	-0.771161	0.00628435	0.0159311
HERVL_12p13.31a	4.00565	9.13227	9.73	12.8847	-0.47901	0.00638441	0.0161746
HERVH_18q12.2b	3.21995	7.87583	8.49206	12.4524	-0.433964	0.0064599	0.0163557
HERVH_13q14.11b	331.558	430.153	124.159	77.0219	0.712517	0.0064713	0.0163743
ERVLE_11q13.5b	12.659	19.5537	20.8707	20.7682	-0.537597	0.00660399	0.0166996
MER34B_4q21.22b	15.2116	45.5689	20.5547	22.2694	-0.593328	0.00664426	0.0167809
MER4_3q29c	142.509	111.14	201.219	136.971	-0.638511	0.00664447	0.0167809
HERVP71A_13q21.32	240.999	1755.16	1.57827	5.7298	0.6507	0.00664989	0.0167809
ERV316A3_8q24.12b	215.188	226.82	107.545	127	0.79428	0.00665311	0.0167809
HERVH_4q22.1h	17.0867	26.9503	6.58817	11.8872	0.56945	0.00665686	0.0167809
HARLEQUIN_1p35.3	96.5232	60.4203	119.752	49.0262	-0.411145	0.00667643	0.0168198
HML2_11q12.3a	23.7092	40.9315	33.4934	32.2062	-0.669467	0.00673844	0.0169655
HERVH_19p13.2b	250.269	267.456	303.105	174.916	-0.46527	0.00679387	0.0170944
HUERSP2_3q26.1e	13.2042	45.2606	21.3607	35.0599	-0.620499	0.00681034	0.0171252
HERVE_11q13.2c	15.6015	20.8547	7.04174	14.1794	0.57627	0.00684925	0.0172123
HML3_4q23a	3.54848	8.20284	10.4494	18.7087	-0.455641	0.0068538	0.0172131
HARLEQUIN_6p21.31	145.507	94.2654	183.538	89.6988	-0.550272	0.00690288	0.0173256
ERVLE_9q33.2b	23.6929	28.7395	9.69952	12.5938	0.586306	0.00693035	0.0173838
HERVH48_1q25.3	4.83016	9.25817	15.0986	22.9492	-0.50798	0.00695011	0.0174226
ERVLE_3p12.3	5.11998	13.1952	13.0196	18.1644	-0.539402	0.00696651	0.0174462
ERVLE_2q21.2a	33.7604	28.4955	20.3013	21.5673	0.582474	0.00696815	0.0174462
ERV316A3_7q21.11d	3.69245	13.9357	10.289	15.6729	-0.515677	0.00701601	0.0175552
MER4B_5p14.1b	28.3786	82.0208	3.17118	6.86574	0.593106	0.00705024	0.01763
HERVFH21_14q32.31b	217.246	1406.32	56.9817	41.8411	-0.687438	0.00707924	0.0176916
PRIMA41_7q21.12	14.7118	18.1298	8.62416	18.7606	0.542833	0.00711624	0.0177731
HUERSP3_11q13.4	239.341	113.251	314.925	165.377	-0.357368	0.00712738	0.0177899
HML6_19p13.2a	4.95038	24.1726	15.5264	30.8062	-0.570102	0.00716294	0.0178677
HERVH_6q22.31h	3.29463	10.7916	9.66848	18.7108	-0.475868	0.00718913	0.0179219
ERVLB4_8p11.22b	30.4825	185.793	0.235455	1.79317	0.500765	0.00722169	0.017992
HML1_22q12.2	38.2705	35.5031	24.2765	24.3158	0.563975	0.007267	0.0180938
ERV316A3_3q25.32a	3.29097	8.24827	10.808	19.4363	-0.468908	0.00727879	0.018112
HERVIP10FH_19q13.41	13.8839	18.532	6.53938	11.8919	0.52729	0.00741213	0.0184325
MER4B_21q22.3	23.3213	35.8146	32.9384	32.1955	-0.664234	0.00742935	0.018464
HERVH_6q25.3b	45.4567	58.228	73.011	87.8923	-0.7125	0.007463	0.0185362
HARLEQUIN_2q34	34.877	46.9061	73.4825	100.731	-0.760841	0.00751753	0.0186602
PRIMA4_14q22.1	47.1706	46.7713	71.5135	54.5019	-0.616895	0.00755067	0.018731
ERVLB4_9q31.3	31.6823	44.5229	10.4187	15.8341	0.657398	0.00755653	0.0187341
ERVLE_19q12b	8.58412	16.5616	2.41178	6.33019	0.454724	0.00757068	0.0187577
LTR25_21q22.11	31.9345	39.3046	47.0252	36.6119	-0.651218	0.00766564	0.0189813
MER4B_Xq11.1b	3.3716	7.51747	9.39938	14.3196	-0.460718	0.00776956	0.0192269
HERVW_11q14.2	25.347	27.8738	36.7279	28.0389	-0.564733	0.00781949	0.0193387
HML1_17q25.1	100.385	72.7215	123.279	54.453	-0.473554	0.00782586	0.0193426
HARLEQUIN_Xp11.22	1.9677	7.09768	9.73354	24.4675	-0.443742	0.00784402	0.0193757
MER61_1q21.3	8.24984	13.8468	3.28093	8.65368	0.43642	0.00786368	0.0194124
HERVH_2q31.1b	10.1474	15.7945	20.299	22.8299	-0.564514	0.00806353	0.0198936
ERVLE_17p13.1	10.6473	17.1436	18.8298	20.1555	-0.549695	0.00807115	0.0199003
ERV316A3_2p15a	15.9089	50.0418	2.43558	6.73344	0.531437	0.00810816	0.0199794
HERVH_6q21a	27.078	62.1397	7.96005	16.5382	0.625399	0.00812533	0.0200095
PRIMA41_17q21.31b	449.157	634.673	238.323	160.202	0.520284	0.00814071	0.0200353
ERV316A3_1q21.3a	8.66735	18.4576	2.30109	7.1455	0.431883	0.00819961	0.0201679
HERVH_11p15.4b	67.3765	107.343	83.1146	74.7247	-0.799613	0.00826473	0.0203158
HERVH_11p15.4i	5.4475	13.1162	14.2311	22.9323	-0.511492	0.0083056	0.0204039
HARLEQUIN_12p12.2	11.7341	41.9086	0	0	0.475929	0.0083414	0.0204794
ERVLE_7q31.33a	96.4288	451.968	0.743698	4.06044	0.633384	0.00835446	0.020499
HUERSP3_1p36.13	2571.62	1345.53	1943.86	538.688	0.291766	0.00849985	0.0208431
HUERSP3B_3q26.1	16.2867	58.6059	0.273482	2.08278	0.487032	0.00862055	0.0211264
HUERSP1_2p22.3	19.0908	26.1601	6.83729	11.9733	0.554995	0.008658	0.0212053
HERVH_8q24.21b	528.06	2107.21	5.23333	18.6418	0.962566	0.00870414	0.0213054
HERVH_14q32.31b	447.294	2389.14	210.721	152.215	-0.651929	0.00875597	0.0214193
MER61_10p15.1	22.2131	27.882	9.06216	12.2612	0.55406	0.00880396	0.0215237
LTR57_3q21.2	6.20745	8.90741	14.5875	18.2491	-0.499012	0.0088343	0.0215849
ERV316A3_Xq23b	10.0422	18.1736	16.6687	18.8068	-0.531627	0.00889393	0.0217175
MER4_4p16.3a	270.189	148.489	191.928	113.734	0.485925	0.00905895	0.0220947
HERVFH21_2p15	5.55262	9.81404	11.4184	14.4153	-0.443016	0.0090593	0.0220947
HUERSP1_15q24.2	10.2602	12.2242	5.2231	10.5153	0.448969	0.00907845	0.0221265
HERVH_8q21.2b	19.512	80.3503	0.840163	3.21081	0.477993	0.00908326	0.0221265
HERVIP10F_22q11.1	32.7167	127.369	0	0	0.576899	0.0091267	0.0222189
HML4_19p12	44.4478	82.9545	46.932	38.1686	-0.690299	0.00914013	0.0222382
HERVL_10q21.1a	11.7677	20.412	29.8724	86.2175	-0.620592	0.00914686	0.0222412
ERV316A3_3p24.1	10.0694	23.67	16.6469	22.9601	-0.542307	0.00919386	0.0223421
HERVH_3q26.1c	12.1847	26.7934	2.86464	8.61374	0.498923	0.00921205	0.0223729
HARLEQUIN_19p12e	50.4936	219.957	2.58952	7.01485	0.588525	0.00927099	0.0224973
ERVLE_12p13.31b	3.19072	5.95254	10.6949	16.6461	-0.45809	0.00927436	0.0224973
HML5_12q24.32	28.3657	125.696	0.734359	3.17496	0.562311	0.00928869	0.0225185
HERVK11_Xp11.21	33.8595	33.946	20.0927	22.9825	0.576788	0.00929596	0.0225227
HERVH_1q31.1a	293.765	1327.8	373.057	794.531	-1.08389	0.00930661	0.022535
ERVLB4_6q21b	13.2878	30.0623	4.34677	10.3328	0.47701	0.00935557	0.02264
HERVIP10FH_7p14.1	17.8192	88.866	1.03	4.32611	0.491339	0.00938811	0.0227052
HML6_17q21.31	8.60742	15.6075	16.196	18.145	-0.528914	0.00949789	0.022957
MER34B_9q22.31a	84.1751	71.8368	58.347	55.731	0.607236	0.00954204	0.02305
HERVH_10p14a	12.7471	26.6441	28.312	44.1579	-0.641636	0.00958012	0.0231282
HERV9_6q25.1	168.821	128.929	237.57	181.325	-0.561603	0.00962566	0.0232036
HUERSP3_19q13.43	13.0972	16.3149	20.8329	16.4741	-0.507632	0.00962646	0.0232036
HERVL74_7p14.1	81.9693	48.1596	109.884	61.4997	-0.480017	0.00962853	0.0232036
HUERSP3_1q44	58.7985	111.178	61.2063	45.5454	-0.652889	0.00965984	0.0232652
MER61_18q22.3	0.13511	1.02897	20.9292	81.2876	-0.507272	0.00968401	0.0233095
HERVL_5p14.1g	58.5849	216.252	0	0	0.614308	0.00969407	0.0233199
HERVL74_16q24.3	1272.35	1005.1	1401.13	469.324	-0.353869	0.00979507	0.0235373
PRIMA4_1q21.2c	25.3677	31.0456	12.5281	16.2537	0.558584	0.00979609	0.0235373
MER41_8p11.21	37.5115	45.3053	16.2264	17.9257	0.588138	0.00980872	0.0235537
LTR25_4q32.1	13.6865	25.9282	3.49726	8.5456	0.540821	0.00983376	0.0235998
HERVH_2p16.3a	26.0773	28.6614	35.5167	28.1185	-0.567848	0.00990167	0.0237488
MER4_5p12d	432.614	320.772	282.865	203.18	0.512975	0.00992854	0.0237991
HERVIP10FH_2q14.3b	9.49831	17.1254	3.18189	5.65162	0.399582	0.00997507	0.0238965
MER41_1q41a	143.632	124.354	173.917	96.4264	-0.602401	0.0100528	0.0240686
HERVFH21_Yq11.21	3.99267	11.7488	16.3319	28.5984	-0.555165	0.0101689	0.0243321
ERV316A3_6q25.1b	8.82497	13.1867	3.907	8.4292	0.440111	0.0102005	0.0243932
HERVIP10FH_14q23.1	284.134	161.559	373.511	215.695	-0.392576	0.0102187	0.0244203
LTR25_Yq11.223e	4.04637	10.4687	13.8093	24.3164	-0.529351	0.0102238	0.0244203
HUERSP3B_Xq22.1	13.1564	18.4709	21.145	19.999	-0.520789	0.0103288	0.0246563
HML5_Xq11.1	33.3715	24.4002	49.9147	36.0857	-0.516536	0.0103498	0.0246921
HML3_8q13.2	52.725	89.1099	70.046	83.2737	-0.701375	0.0104009	0.0247877
HERVEA_11q12.2	7.39121	16.3606	13.2073	15.7609	-0.491038	0.0104081	0.0247877
ERVLB4_2q21.1c	53.3485	58.3103	26.035	23.977	0.601164	0.0104083	0.0247877
MER101_9q34.3	20.9454	31.3389	8.28611	10.5465	0.538108	0.0104581	0.0248844
HARLEQUIN_12p13.32	20.9331	34.1703	31.352	37.6333	-0.642341	0.0104612	0.0248844
LTR25_19q13.43	80.1237	49.7813	55.5275	37.5651	0.511434	0.0105002	0.0249491
PRIMA4_Xp11.21	52.5108	44.7238	68.9342	44.0525	-0.538717	0.0105007	0.0249491
HERVW_12q13.3	20.7396	35.5227	6.96678	9.27603	0.529476	0.0105125	0.0249625
HERVL_Xq27.2a	14.8563	57.3079	1.31408	5.75637	0.478908	0.0105408	0.0250151
ERV316A3_3q26.2b	5.59285	10.3964	13.7447	23.7904	-0.500541	0.0105928	0.0251238
HERVL_4p13a	6.01798	11.1894	13.2572	17.1115	-0.460317	0.0107382	0.0254538
HERVH_19q13.12a	337.831	236.066	441.439	262.558	-0.453795	0.010811	0.0256022
ERV316A3_17q21.32	6.13613	10.5338	11.312	12.799	-0.472145	0.0108135	0.0256022
MER101_3q13.11a	17.888	56.3259	1.87044	6.07025	0.504653	0.0108863	0.0257596
ERV316A3_11q12.1a	40.8183	69.6451	38.1508	42.5001	-0.672725	0.0108941	0.025763
MER34B_2q35	7.38598	13.4124	2.77401	8.33823	0.405342	0.010941	0.0258589
HERVS71_11p15.4	49.5412	63.9332	56.1763	43.587	-0.635639	0.0109511	0.0258676
MER4B_Yq11.221b	65.8182	313.761	0.560618	3.17566	0.651853	0.0109788	0.0259109
ERVL_Xp11.22a	1338.26	699.734	1567.36	543.143	-0.292712	0.0109822	0.0259109
ERVLB4_19p13.11	392.156	218.247	467.914	154.393	-0.418857	0.0109967	0.0259299
PABLA_6p12.3	13.3402	48.0194	23.0881	35.6257	-0.612663	0.0110632	0.0260715
HML3_8p11.22	69.6791	388.706	2.98888	7.56883	0.630347	0.011162	0.0262891
HERVEA_1q41	34.9317	148.435	0.869848	3.77382	0.579496	0.0111726	0.0262987
ERVLE_2q11.2b	374.957	188.908	287.532	98.1276	0.293203	0.0112445	0.0264527
HERVP71A_15q24.2	99.076	166.159	37.9804	29.4707	0.671446	0.0112557	0.0264635
HERVIP10F_1q25.1	85.2072	325.792	4.02192	7.6826	0.718486	0.0112742	0.0264814
HERVH_6q23.1	80.1409	92.2562	116.182	90.4474	-0.720334	0.0112763	0.0264814
MER4B_5q14.1	141.305	87.6395	94.7136	61.881	0.505084	0.0112963	0.0265038
HERVL40_8p23.2a	3.24285	8.53464	10.5682	21.2628	-0.437723	0.011299	0.0265038
ERVLE_2q34g	8.55418	16.7937	16.4249	22.0443	-0.491963	0.0113377	0.0265792
ERVLE_18q12.2a	26.0267	21.5796	16.1512	16.4806	0.482865	0.0113702	0.0266402
HUERSP2_21q21.1b	11.7921	56.0353	0	0	0.424443	0.0113923	0.0266763
HERVH_15q26.3b	1858.5	1148.52	2161.04	941.61	-0.364822	0.0114707	0.0268444
ERVLB4_1p21.3a	3.93187	7.93175	9.28156	12.9793	-0.420209	0.0115309	0.0269698
MER61_1p22.2a	11.2216	20.6833	2.9294	6.53788	0.44838	0.011568	0.0270411
MER4_19p12a	210.591	197.732	100.138	67.2338	0.638941	0.0115956	0.0270897
HERVL_4q24d	30.7064	49.0036	41.5364	34.7247	-0.580421	0.0116243	0.0271412
HERVL_14q21.2c	5.52811	35.7019	7.69836	13.1933	-0.463442	0.0116422	0.0271673
HERVH_10q24.31a	4511.97	2604.51	3382.96	1081.54	0.295675	0.0116676	0.0272074
ERVLB4_1p34.2b	9.61446	22.1464	2.44781	7.17521	0.480964	0.0116728	0.0272074
PRIMA41_19q13.2a	26.059	29.0271	13.2386	16.3887	0.529828	0.0117454	0.0273609
ERVLB4_13q31.2i	13.4019	51.2202	0	0	0.462415	0.0118285	0.0275233
HERV3_2q14.3	22.6285	23.1871	11.5131	13.4963	0.514143	0.0118287	0.0275233
LTR19_14q24.2	24.153	25.0604	40.2759	35.5474	-0.57566	0.0118727	0.0276098
ERVLB4_7p14.1	5.72088	10.606	10.9348	12.4867	-0.447498	0.0119577	0.0277846
HML6_Xp11.22	834.423	476.284	1014.75	420.191	-0.44514	0.0119616	0.0277846
HERVL66_19p12g	53.1661	139.767	10.9851	16.2172	0.671914	0.0119758	0.0278017
HERVW_11p14.2	152.576	552.03	2.5151	11.7247	0.731441	0.012071	0.0280065
MER4B_11q12.1	311.827	128.068	256.096	143.681	0.368534	0.0120854	0.028024
MER4_10q23.2	3.31308	6.14071	9.46762	13.7841	-0.421548	0.0121208	0.0280901
ERVLE_1q25.3g	5.14417	9.42545	9.75748	10.9697	-0.421597	0.0121372	0.0281121
LTR57_10p11.21	11.1792	13.6742	5.70313	10.4299	0.448659	0.0122265	0.0283025
HERV4_15q21.3	47.3794	44.8331	68.5273	49.9054	-0.575989	0.0123287	0.0285183
MER61_1q42.12	124.584	202.047	119.123	67.5553	-0.562685	0.0123337	0.0285183
MER4B_Xq26.2b	111.672	161.527	27.6455	25.0147	0.759013	0.0123651	0.0285745
ERVLB4_11p15.4c	8.32435	11.8013	14.9279	16.2393	-0.446219	0.0124276	0.0287026
ERV316A3_11p13c	12.427	28.2697	18.808	19.483	-0.494561	0.0124709	0.0287861
HERVH_3p11.1b	12.452	44.1515	1.50238	6.63702	0.472817	0.0125046	0.0288475
MER61_5q23.1	7.83773	12.9493	14.0585	15.3801	-0.459732	0.0125375	0.0289068
HERVL40_5p15.2	17.6317	78.9749	0.276302	2.10425	0.458776	0.0125911	0.029014
HERVH_10q25.1c	8.56636	15.7264	3.10086	8.56859	0.444432	0.0126235	0.029072
MER61_18q21.2b	12.0438	19.6548	4.23395	9.44523	0.482943	0.0126343	0.0290805
ERVLB4_12p12.3d	14.8109	39.9774	1.28477	5.07792	0.509638	0.0126439	0.0290824
ERVLB4_6q23.2a	6.99291	12.0109	15.3246	20.2386	-0.502394	0.0126495	0.0290824
ERVLE_5q22.2a	4.80794	8.7959	10.1246	12.7378	-0.417454	0.0127142	0.0291926
ERVLB4_5q12.1a	2.81965	9.21899	8.56743	15.4373	-0.429969	0.012719	0.0291926
MER41_8q12.1a	87.9404	60.6342	60.8646	41.2846	0.448335	0.0127191	0.0291926
ERVLE_13q12.11	50.4917	52.3766	28.7758	28.836	0.616609	0.0127343	0.0292111
HUERSP1_2q11.2	71.8571	53.6836	45.9387	33.2828	0.528446	0.0128744	0.0295156
MER4_17p11.2b	147.516	115.025	195.835	134.387	-0.480458	0.0128877	0.0295296
ERVLE_13q31.2e	17.4611	66.6352	0	0	0.474048	0.0129687	0.0296984
MER4_17p11.2a	13.2828	27.9743	4.60782	9.17248	0.482268	0.0130518	0.0298718
ERVLB4_15q13.2c	21.5913	39.8859	7.31904	12.4689	0.535983	0.0131344	0.0300437
ERVLB4_14q21.3d	36.9999	33.7227	51.3759	35.9363	-0.542498	0.0131488	0.0300597
MER61_7p21.3b	84.8062	91.9125	48.8773	40.5259	0.555634	0.0132466	0.0302662
ERV316A3_12q24.11	14.0587	16.8947	7.28886	10.8924	0.450472	0.0133577	0.0305029
PRIMA41_19q13.2b	27.2951	28.3368	15.2334	18.7985	0.54405	0.0133663	0.0305054
HARLEQUIN_Xq23b	659.216	828.113	749.37	577.089	-0.620349	0.0133768	0.030512
HERVP71A_11p14.1	2.38233	6.10682	8.49549	16.1126	-0.407687	0.013538	0.0308625
HML2_3q27.2	39.8138	93.2837	11.6591	26.7575	0.674925	0.0135756	0.0309007
HML3_19p12f	206.252	1065.69	3.00862	9.13962	0.647483	0.0135758	0.0309007
HERVIP10FH_14q11.2	62.6551	261.441	1.8818	5.86196	0.604469	0.0135777	0.0309007
HERVH_15q15.2	13.3146	16.7403	24.2575	25.6564	-0.521424	0.0136742	0.0311028
HERVH_4q28.2	12.586	45.0502	13.1004	16.6346	-0.534409	0.0137096	0.0311593
ERVLB4_9q22.33d	17.7512	19.7097	27.6588	23.6522	-0.507626	0.0137176	0.0311593
HERVIP10FH_18q12.1	28.8941	110.142	0.293257	2.23338	0.542587	0.0137221	0.0311593
HERVFRD_7p21.3	34.3582	60.1534	13.1327	19.361	0.619935	0.0138676	0.0314721
HERV3_21q22.13	382.315	424.414	135.416	65.0246	0.653026	0.0138997	0.0315273
ERV316A3_22q13.33a	439.196	347.045	247.021	133.64	0.544291	0.0139882	0.0317103
HML5_19p12a	7.70149	13.0707	15.5776	19.5633	-0.489551	0.014119	0.0319889
MER61_7q21.11	49.8417	108.453	11.0926	25.4169	0.676438	0.0142434	0.0322527
HUERSP3_10q23.33b	6.32083	12.9099	14.6951	21.8434	-0.479857	0.0142763	0.0323091
MER41_8q24.3	15.0965	35.99	49.0508	366.907	0.594251	0.0143225	0.0323955
PABLA_7q31.31	10.4393	50.5962	0.208017	1.58421	0.413796	0.0143384	0.0324133
HERVL40_8q22.2	9.80265	16.8743	3.83644	7.35769	0.409205	0.0143996	0.0325337
HERVL_2q34c	23.7826	36.1442	33.9444	34.2986	-0.582152	0.0144597	0.0326513
ERV316A3_21q21.1g	11.188	53.0189	0	0	0.395264	0.0144919	0.0327057
HERVL_1q23.3a	1168.26	663.702	1341.48	482.113	-0.319868	0.0147402	0.0332476
HERVFH21_13q31.1	14.7552	20.2581	7.27069	12.764	0.482387	0.0147931	0.0333483
HERVL_5p13.2c	25.7236	32.0216	34.1216	26.4402	-0.533026	0.0148397	0.0334348
ERVL_2p22.1a	8.76745	14.2523	3.15383	6.31477	0.408009	0.0149044	0.0335618
HERVL_10q26.3b	210.415	200.233	122.393	81.1054	0.526538	0.0149419	0.0336277
HERV4_20q13.33a	39.5811	58.5064	16.3296	16.8215	0.576969	0.0149654	0.0336618
ERVL_9q33.2a	3.80651	9.42841	8.63436	12.3604	-0.405988	0.015088	0.0339186
HERVIP10F_6q15	16.2775	26.3286	26.8396	31.0667	-0.532008	0.0151235	0.0339797
HERVL40_1q41	58.3011	47.1352	35.4764	25.1743	0.501738	0.0151528	0.0340266
ERV316A3_4q21.1m	34.8132	169.495	6.13928	11.022	0.521667	0.0152668	0.0342636
HERVL18_6p22.1a	189.826	215.205	210.763	97.7212	-0.410394	0.0154297	0.03461
HERVH_2p14a	21.1185	57.4454	28.4403	37.4312	-0.645375	0.0154484	0.0346327
HERVE_10p13c	64.588	200.645	85.2538	210.844	-0.722755	0.0154702	0.0346624
HARLEQUIN_10q21.2b	6.76888	12.5043	13.1454	16.0051	-0.46365	0.0154867	0.0346803
HERVK11_13q22.3	3.08046	8.31725	8.99822	14.7388	-0.440514	0.0157207	0.0351848
HERVL_1p31.1e	12.3976	18.789	16.7638	14.6958	-0.46695	0.0158143	0.0353649
ERVLE_1q44a	11.6815	15.1427	20.6447	21.0828	-0.48705	0.0158186	0.0353649
HML5_13q12.13	23.7085	27.9681	12.0599	17.3378	0.522469	0.0158784	0.0354791
HERVH_7q36.1b	48.0785	56.2128	31.6679	28.5371	0.531732	0.0159197	0.0355517
HARLEQUIN_2p24.3	24.0508	107.632	0	0	0.447571	0.0159912	0.0356915
HERVH_4q31.21c	89.3151	92.7089	45.5748	46.4171	0.691154	0.0160085	0.0357105
LTR23_7p11.2	36.4096	146.489	1.57601	5.00008	0.516947	0.0160675	0.0358226
HERVW_6q23.3a	13.1119	24.8243	48.0103	84.7709	-0.694682	0.0162075	0.0361015
HML3_19q13.41b	37.3625	48.8994	50.0095	40.578	-0.576754	0.0162105	0.0361015
HERVS71_3q24	9.7681	15.9243	3.84459	7.53678	0.416659	0.0162623	0.0361809
HERVH_11q21a	13.7448	44.0614	19.9226	25.6081	-0.576091	0.016264	0.0361809
LTR23_Xp11.21	21.9849	25.7093	32.3261	29.0649	-0.516022	0.0163234	0.0362932
HERVEA_Yq11.21	29.3321	86.2153	165.895	481.2	-0.925521	0.0163617	0.0363584
HML2_3q21.2	186.248	179.272	227.917	130.811	-0.489396	0.0165645	0.0367889
HERVE_13q14.11a	2451.95	2085.27	1766.34	508.591	0.283187	0.0166468	0.0369513
HERVFRD_12q13.3	3.56289	7.99795	10.1132	17.9693	-0.446491	0.0167343	0.0371252
MER101_2q36.3	31.648	32.1054	44.2027	35.6762	-0.54981	0.0168338	0.0373255
ERVLB4_7p12.1b	12.2908	33.8526	1.35844	4.84067	0.455602	0.0169151	0.0374852
ERVLE_8q11.21a	87.6154	67.6009	54.8303	39.1145	0.529181	0.016947	0.0375354
ERV316A3_7q21.3a	26.5138	99.5488	4.21513	9.4718	0.516	0.0170914	0.0378346
HML5_2q32.1	19.1817	23.0878	8.96552	12.2966	0.48466	0.0171464	0.0379355
ERVLB4_4q13.2b	20.5039	58.6615	3.35857	7.97625	0.503526	0.0173584	0.0383837
ERVLB4_8p23.1n	6.34323	13.4965	18.0121	37.3766	-0.495602	0.0173918	0.0384366
HARLEQUIN_19p13.11	1171.12	513.658	1323.17	320.934	-0.247903	0.0174169	0.0384711
HML3_4q13.3b	32.997	47.9123	38.7911	31.1311	-0.593575	0.0174414	0.0385041
MER61_17q11.2	11.6426	17.4739	19.4821	19.9616	-0.476979	0.0174916	0.0385939
MER4B_Xq13.3	18.8798	22.0747	30.7189	29.3187	-0.541856	0.0175253	0.0386472
MER41_4q21.1b	14.5988	80.412	0.888171	3.41447	0.402226	0.0175382	0.0386546
ERVLE_1p34.1b	15.1698	20.9056	9.00104	19.2638	0.490283	0.0176377	0.0388528
PRIMA41_18p11.32	58.6961	97.3634	20.063	39.2881	0.747984	0.0176678	0.0388979
HERVS71_12p13.31b	42.9527	53.3474	72.6753	101.418	-0.635604	0.0178359	0.0392468
HERVH_19p12b	532.02	1370.29	42.7574	35.2874	0.928815	0.0178913	0.0393409
HERVH_19p12k	23.2455	82.1292	8.82816	61.2168	0.555685	0.0178981	0.0393409
HERVH_8p23.1i	52.9122	79.0196	101.775	132.847	-0.872637	0.0180566	0.0396676
MER101_11p12a	11.001	47.6241	0	0	0.412704	0.0181444	0.039839
ERV316A3_8q24.21b	3.6039	8.85359	7.29526	10.0452	-0.384186	0.0181941	0.0399264
MER4_13q12.12d	18.8185	31.3634	26.7657	25.8332	-0.528558	0.0182462	0.0400191
ERVLE_4q34.3f	7.40447	12.3983	3.12255	6.34051	0.372738	0.0183025	0.0401209
ERVLE_14q24.3	7.41323	10.1156	16.9466	22.2085	-0.449729	0.018396	0.0403041
HERVK14C_7q36.1	6.16073	10.8629	17.2145	30.7063	-0.476851	0.0185033	0.0405172
ERVLB4_10q21.3e	8.29215	14.1425	3.20002	7.86669	0.408341	0.0185301	0.0405539
ERVLE_8q21.3f	43.5637	50.2595	54.3479	35.8236	-0.509157	0.0186082	0.0407029
ERVLB4_2q11.1a	96.7564	101.332	112.347	69.0519	-0.516877	0.018631	0.0407307
HML3_19p12b	315.574	182.579	385.021	167.374	-0.343814	0.0186659	0.0407707
ERV316A3_11q23.3d	5.47712	11.6383	12.3689	21.8666	-0.430914	0.0186694	0.0407707
HERVH_2p13.3d	10.9112	24.9745	2.71495	6.73775	0.420492	0.0188702	0.0411871
HERVL74_10p11.22	732.768	629.77	797.661	402.839	-0.412689	0.018921	0.0412752
HML3_5p15.33c	8313.23	7917.58	4431.58	1330.19	0.436891	0.018931	0.0412752
LTR46_Xq11.1	13934.9	4671.89	11577.4	3561.61	0.233211	0.0189737	0.041346
HARLEQUIN_4p15.2	12.701	30.2038	30.4058	55.181	-0.591244	0.0190364	0.0414405
ERVLE_12p13.31c	51.974	119.69	12.535	14.0574	0.599163	0.0190375	0.0414405
HERV3_7q34b	19.721	33.7526	8.66835	11.554	0.461608	0.0190898	0.0415322
ERVLE_3p21.31e	13.0282	17.3497	6.62769	13.8661	0.473092	0.0191096	0.041546
MER41_6q22.31b	20.169	20.8717	36.0912	34.1702	-0.528076	0.0191167	0.041546
ERV316A3_19q13.31	27.0464	45.2454	8.49837	12.6235	0.534463	0.0194774	0.0423072
ERV316A3_5q14.1	143.289	97.5677	111.233	90.3994	0.480303	0.0195218	0.0423809
ERVLB4_8q21.13c	975.425	1220.6	597.398	336.417	0.431805	0.0196216	0.0425567
HERVK11_12q21.31	15.1171	59.7784	0	0	0.417869	0.0196295	0.0425567
HERVH_7q33a	3.19333	13.2963	6.85806	11.6345	-0.379866	0.0196343	0.0425567
ERVLE_2q36.3c	12.8647	35.7546	2.71669	7.59547	0.450774	0.0197776	0.0428445
HERVH_11q24.1c	45.1065	75.6016	15.2769	21.9135	0.631357	0.0198025	0.0428754
ERVLE_2q35a	33.2408	36.5591	14.5741	15.4307	0.552436	0.0198285	0.0429088
MER4_Xq27.2d	7.24274	21.1502	3.30416	18.6825	0.384999	0.0198803	0.0429927
ERVLE_1p35.3c	10.1521	16.6505	19.7105	30.2788	-0.483776	0.0198885	0.0429927
ERV316A3_2q36.2	60.6715	51.9249	39.3309	37.0749	0.567979	0.0199326	0.043065
MER41_5q23.1b	8.07345	13.7504	14.5179	17.3476	-0.452709	0.0199569	0.0430945
HUERSP3_12p12.2	22.1124	103.255	0.241463	1.83893	0.469	0.0199961	0.0431562
HML3_1p36.13b	18.0109	20.0207	10.1689	15.0102	0.453731	0.0201614	0.0434898
MER4_1q41b	16.606	74.5533	0.629871	3.92418	0.424494	0.0202742	0.0437099
HERVL_5q22.1a	2.7021	8.02241	7.83877	14.2372	-0.410244	0.0204346	0.0440322
ERVLE_9q31.3	9.86731	17.6788	3.37166	8.69884	0.420996	0.0204686	0.044082
ERV316A3_11q21a	7.48502	12.1966	3.79072	9.95477	0.371381	0.0205035	0.0441338
HERVH_10q21.1a	8.52153	32.4224	11.4388	15.4914	-0.466267	0.0205197	0.0441451
ERVLB4_2q37.1b	45.3767	42.1624	25.5171	19.836	0.487485	0.020577	0.0442448
HML1_19p12e	10.1516	13.8565	18.6555	20.7697	-0.470092	0.0206143	0.0443016
MER4_3q26.1a	8.78256	14.4482	15.575	18.7571	-0.462177	0.020666	0.0443705
HML3_19p13.2b	18.8084	41.1698	23.9436	25.4145	-0.539351	0.0206683	0.0443705
ERV316A3_22q13.31a	36.1505	40.4278	18.3199	17.5503	0.512264	0.0207167	0.0444509
ERVLE_19q13.41a	3.549	9.28238	9.76703	18.034	-0.414176	0.0207498	0.0444984
HERV9_Yp11.2b	2.96938	7.18435	10.4935	18.5544	-0.436208	0.0209325	0.0448665
ERVLE_21q22.3b	17.7805	108.079	0.764296	3.8461	0.384459	0.0210709	0.0451392
MER41_12q13.11	64.3465	66.3549	34.9923	32.5586	0.561117	0.0211751	0.0453385
HERV4_1q22a	114.13	95.6532	153.06	114.083	-0.454156	0.0213205	0.0456256
HERVH_8q21.2a	12.5009	56.0451	0.173503	1.32136	0.378126	0.0213512	0.0456673
ERVL_14q12	13.3458	40.7625	0.944866	3.5563	0.436183	0.0214252	0.0458013
HML1_8q12.1	11.2669	17.7367	5.35279	9.979	0.415334	0.0215695	0.0460854
MER34B_14q31.3	9.2524	12.0225	16.8865	18.417	-0.446	0.0216215	0.0461723
MER4B_Xq26.2a	373.333	526.728	100.426	63.9047	0.708709	0.0217482	0.0464183
HML1_19p13.2	37.6004	30.5639	52.4008	35.1319	-0.466726	0.0219421	0.0468074
ERVLE_10p11.22b	29.8671	26.4833	40.0029	26.6849	-0.440555	0.022033	0.0469767
HERVH_3q25.2b	30.7391	176.641	1.55076	4.67865	0.455486	0.0220745	0.0470404
MER4_8q24.3d	219.797	95.6258	272.215	115.966	-0.307253	0.0222188	0.047323
HML3_Xq13.3	530.987	266.997	607.85	189.243	-0.271575	0.0223183	0.0475099
HUERSP3_7q11.21b	22.9561	26.5897	13.2098	14.9289	0.46489	0.0223335	0.0475174
ERVLE_1p22.1a	9.66622	13.8862	3.93306	6.96412	0.391166	0.0223478	0.0475227
MER4_21q22.3a	173.53	194.196	95.446	77.6375	0.582907	0.0224009	0.0475867
MER101_13q14.11	25.9614	22.9842	38.1478	27.6383	-0.478273	0.0224013	0.0475867
HERVL_Xp11.21b	13.8459	21.2144	6.4118	10.7153	0.409362	0.0225209	0.0478157
ERV316A3_8q24.12d	10.2347	18.1931	15.6508	16.9414	-0.428004	0.0225506	0.0478535
ERVLB4_16q13a	22.5946	40.0409	10.5535	25.6615	0.51964	0.0227365	0.0482228
ERVLB4_19q13.42a	8.46374	21.5794	14.7972	21.8407	-0.481999	0.0227497	0.0482256
ERVLE_8p11.22b	12.0565	19.2202	4.8845	7.89197	0.421594	0.0229202	0.0485616
HERVH_13q21.32b	31.2259	92.1435	29.2278	36.177	-0.658607	0.0230562	0.0488241
MER4B_13q14.11a	16.9564	16.7825	26.2771	21.2841	-0.466976	0.0230798	0.0488487
HERVW_6q21a	7.39277	17.7096	12.3713	16.1526	-0.441281	0.0231329	0.0489355
HERVIP10FH_16p12.3	7.96965	17.7211	12.8775	15.8364	-0.422456	0.0233404	0.0493486
HERVEA_Yq11.221d	13.234	52.2839	45.3747	121.037	-0.661133	0.0233663	0.0493776
HML4_4q13.3	11.2986	62.163	0.844623	3.22084	0.349365	0.0234512	0.0495312
HERVH_4p16.1a	259.487	159.996	350.202	233.317	-0.461158	0.023514	0.0496158
HERVIP10FH_6q15a	34.1426	48.6267	50.5326	48.0546	-0.549708	0.0235215	0.0496158
LTR25_Yq11.221c	17.0775	58.2148	0.643134	3.51483	0.456066	0.023528	0.0496158
MER61_3q13.11	15.6331	27.4788	22.5027	24.1081	-0.511809	0.0236248	0.0497941
HERVH_5q23.2g	98.5186	127.45	58.4357	69.5015	0.734506	0.0236607	0.0498436
HERVFRD_4p12a	11.1708	15.7093	16.2609	14.7559	-0.435924	0.0236783	0.0498549
ERV316A3_20p11.21	112.295	74.2452	75.383	41.783	0.420149	0.023697	0.0498683
MER41_3p22.3b	11.509	15.9013	19.3725	19.8802	-0.471428	0.0237427	0.0499386
ERVLE_7p15.3b	9.11975	17.6058	3.06462	6.94063	0.378286	0.0237851	0.04999
HERVL40_7q21.3	4.70687	9.85087	10.8332	15.5111	-0.412655	0.0237918	0.04999
HUERSP3B_2q12.3	45.0697	111.973	10.8206	14.2645	0.576817	0.0238075	0.0499969
PABLA_8p21.3b	8.77021	11.6978	4.22688	7.61148	0.37575	0.0239249	0.0501967
ERVLE_12q23.3a	8.17426	15.8319	13.757	17.0642	-0.454501	0.0239274	0.0501967
HERVW_7q31.32	39.5279	47.3725	46.1496	33.7482	-0.542894	0.0240663	0.0504619
HERVH_3q25.2d	7.85046	16.14	2.29911	6.07366	0.37548	0.0241001	0.0505066
ERVLB4_3q13.11b	4.28447	10.039	10.6795	17.1317	-0.417455	0.0241551	0.0505959
ERVLE_12p13.31d	148.389	842.191	1.32569	4.98679	0.579945	0.0242516	0.0507716
HERVL40_19p13.2	12.9798	42.6969	0.747922	3.25485	0.430249	0.0242988	0.0508441
HERVW_2q24.3	48.2535	37.2021	61.6957	39.8602	-0.45505	0.0243392	0.0509025
ERVLB4_19q13.31c	15.3633	17.4813	8.64961	11.5009	0.428919	0.024369	0.0509386
HERVL_9p24.1a	27.1435	32.3215	35.768	28.5846	-0.493691	0.0244212	0.0510214
ERV316A3_2p25.1b	8.58407	13.8537	16.1303	19.6959	-0.480872	0.0244458	0.0510464
LTR19_17q21.32	70.7137	374.479	2.87991	7.13748	0.572064	0.0244692	0.0510689
HERVH_1p31.3a	7.47628	13.9134	12.3897	15.4137	-0.404386	0.0245114	0.0511306
HERVL_21q21.3h	5.99453	10.7835	10.677	13.0512	-0.389657	0.0245933	0.0512752
HERVH_14q11.2b	55.8097	258.642	1.99178	5.92429	0.543827	0.0247075	0.0514866
HERVFRD_18p11.23	40.345	38.8985	51.4511	36.7067	-0.518792	0.0247448	0.0515379
HERVE_8p23.1h	386.404	526.88	455.401	402.254	-0.774904	0.0248613	0.0517539
HERVH_8q23.3c	18.4642	42.1941	23.2055	27.5548	-0.554686	0.025128	0.0522822
HERVEA_1p21.1d	20.6024	140.635	0.217167	1.65389	0.34864	0.0251617	0.0523255
PABLA_Xp22.2	64.2572	55.339	86.6457	65.919	-0.458611	0.0252378	0.0524567
MER41_13q34b	11.5518	17.3529	5.54323	9.03882	0.396535	0.0252948	0.0525483
ERV316A3_7q21.3b	28.2032	29.918	42.1817	38.5417	-0.516568	0.0253454	0.0526126
HERVE_6q15	29.0581	65.1257	9.55638	20.1004	0.553341	0.0253517	0.0526126
HML5_12q12b	18.8576	27.1638	11.0653	16.0581	0.463525	0.0253883	0.0526616
HML3_19p13.2a	124.508	179.199	58.2457	52.896	0.61437	0.0255466	0.0529627
MER4B_1p22.1c	7.12834	13.1586	11.0182	12.9051	-0.397545	0.0255819	0.0529819
ERVLB4_17q22c	3520.02	2109.71	2629.62	699.98	0.26957	0.0255928	0.0529819
HERVH_1q42.13d	37.9219	148.033	30.5812	50.1059	-0.651843	0.0255951	0.0529819
ERVLB4_3p11.1c	62.7995	41.2942	78.5416	40.7287	-0.374892	0.025676	0.0531223
HERVH_19q13.41b	196.573	98.8347	142.535	81.0632	0.42499	0.0257707	0.0532909
ERV316A3_16q23.1a	34.0413	144.244	9.05513	14.7996	0.491151	0.0258088	0.0533427
ERVLB4_Xp11.21c	62.1174	48.8054	41.1297	29.7289	0.457649	0.025939	0.0535844
HERVL40_4q32.3b	54.2422	265.229	5.4139	9.14693	0.527315	0.025983	0.0536478
HERVH48_2p25.1	12.9853	15.8983	22.4508	21.5325	-0.480494	0.0260169	0.0536906
MER61_6q13b	43.7684	91.369	20.2609	33.7213	0.578464	0.0261164	0.0538684
HERVL40_3p24.3	12.3487	21.0364	25.6011	39.9696	-0.525081	0.0262182	0.0540509
HERVW_Xp11.21	74.6993	71.107	50.1654	54.8603	0.543462	0.0263689	0.0543339
HERVL40_14q24.3	24.2451	25.4933	15.2421	18.8994	0.475999	0.0264504	0.0544741
HERVW_6q27b	46.5177	52.4829	25.8019	24.9544	0.515824	0.0264801	0.0545076
ERV316A3_2q34f	20.1655	26.0653	28.4847	28.2085	-0.481607	0.0265058	0.0545327
ERVLB4_11q24.3a	15.6991	78.6797	1.77271	5.48171	0.425803	0.0266186	0.0547371
ERVLE_5p15.31a	16.7708	35.8279	5.63514	11.0064	0.464487	0.0267694	0.0549748
HUERSP3_6q22.31	2261.68	12617.2	93.0056	188.135	-0.860448	0.0267719	0.0549748
HERVIP10F_10p12.31	32.5341	27.5571	42.4794	29.6769	-0.461848	0.0267749	0.0549748
HERVH_9q33.1a	5.79374	16.9601	11.5709	23.0195	-0.431781	0.0267924	0.0549827
HERVW_13q13.3	131.165	68.8901	99.2867	53.5648	0.389851	0.0268611	0.0550958
HERVKC4_19q11	8.71863	13.0675	3.80682	7.48039	0.364418	0.0270128	0.0553789
HML1_3q21.3	486.548	351.426	352.32	184.108	0.359406	0.0271476	0.0556271
MER4_5p12c	296.018	158.982	227.965	135.759	0.352019	0.0271634	0.0556314
HERV30_4q13.2d	11.4037	58.0684	0	0	0.364908	0.0272837	0.0558495
MER4_12p13.31a	3.55344	9.35608	6.70968	9.57143	-0.346465	0.0273262	0.0559084
ERVLE_4q21.3	179.356	140.209	215.988	87.6182	-0.366845	0.027374	0.0559779
HERV9_6p22.3	96.1895	387.67	73.7638	61.4555	-0.567479	0.0275651	0.0563228
MER61_12p13.31b	707.341	2970.57	3.98601	8.08704	0.761251	0.0275705	0.0563228
HERVS71_10p11.21	3.58821	7.93949	7.51671	10.9364	-0.362594	0.0276319	0.0564197
ERVLE_5p15.33b	192.495	436.5	39.1929	32.076	0.763624	0.0276863	0.0565024
MER4B_3q13.33	21.6281	44.0435	5.70002	10.332	0.495419	0.0277577	0.0566196
HERVEA_1p21.1a	314.034	681.172	320.778	353.36	-1.00688	0.0277728	0.0566219
HML5_12q23.1	2031.07	1292.12	2529.08	1455.05	-0.363615	0.0279175	0.0568883
MER4_3q29b	289.355	260.658	350.82	212.242	-0.46677	0.0279438	0.0569132
HERVIP10F_19p13.11	273.75	216.752	309.661	129.524	-0.353123	0.0280849	0.0571503
ERV316A3_17q24.3a	10.5445	13.5376	18.1087	19.4649	-0.416932	0.0280885	0.0571503
HML5_8p12	10.3838	24.1151	14.6424	16.4665	-0.449986	0.0281378	0.0571989
MER41_9p21.1a	9.96302	33.5766	0.157124	1.19662	0.387626	0.0281405	0.0571989
HERVH_19q13.2b	21.5644	32.892	11.1359	15.6964	0.468545	0.0286077	0.0581192
HML2_6q14.1	18.625	54.4411	5.84381	18.6059	0.497549	0.0287586	0.0583966
HERV4_5q14.1b	59.785	42.8603	76.2495	43.4946	-0.419371	0.0290502	0.0589592
HERVL_10q11.21b	7.19536	14.6706	11.5718	15.1856	-0.409447	0.0290779	0.0589858
ERVLB4_20p12.3c	12.4415	18.8144	6.13512	10.1886	0.389263	0.0291513	0.0591051
MER101_6q25.3b	14.3924	27.8635	20.6302	22.3348	-0.508883	0.0292317	0.0592383
[truncated: 2,052 more rows]

## Sheet: LUSC
HERV	Avg_tumor	SD_tumor	Avg_normal	SD_normal	logFC	P.Value	adj.P.Val
HERVH_6p21.32	61.8971	159.59	2041.51	1049.26	-6.39458	4.31829e-39	1.89228e-35
HERVL_12q21.2b	178.687	443.245	1989.89	732.326	-4.29347	1.67748e-38	3.67537e-35
HERVL_Xq21.33d	11.1533	18.6542	237.448	130.319	-4.37273	1.51362e-37	2.2109e-34
HERVH_12q21.2b	76.7018	173.212	1495.9	593.401	-5.37762	4.01322e-37	4.39648e-34
HERVH_7q22.1b	11.4429	49.0485	318.097	166.453	-5.10124	1.48829e-36	1.30434e-33
HERVFRD_14q11.2	119.483	347.984	2796.29	1406.26	-5.981	6.65772e-36	4.86236e-33
ERVLB4_Xq21.33c	35.0176	67.9167	561.237	336.257	-4.87097	2.52036e-34	1.57775e-31
HML1_15q21.2	301.051	302.148	1.7639	4.17058	5.05358	7.1626e-33	3.92331e-30
HUERSP3B_Xq21.33	55.5242	100.561	891.909	521.985	-5.27305	1.44942e-32	7.05706e-30
HML6_12q24.12a	584.897	784.816	4143.17	1625.38	-3.32714	6.08732e-32	2.66746e-29
HERVL_4q34.1c	72.4987	222.387	1294.12	848.979	-5.83012	7.10478e-32	2.83029e-29
MER4_Xq21.33c	22.9796	40.5869	424.444	303.429	-4.72768	7.92622e-32	2.89439e-29
ERV316A3_8q23.1c	14.1239	30.1483	275.427	263.813	-4.30035	1.77596e-31	5.98637e-29
ERVLB4_1q23.1a	23.9578	97.7081	412.102	362.168	-4.94694	4.12614e-31	1.29148e-28
ERVLE_7p21.3b	167.381	158.485	0	0	4.50891	1.12881e-30	3.29763e-28
HERVH_1q42.13c	118.472	555.624	715.945	417.733	-4.82341	1.73106e-30	4.74093e-28
MER41_2q31.2	6.22592	14.3115	106.522	68.8741	-3.66234	2.56435e-30	6.60998e-28
MER101_2q37.1	11.515	49.9144	114.082	77.2281	-3.71206	2.97287e-30	7.23729e-28
ERVLB4_Xq21.33b	87.3179	263.287	1771.72	1570.94	-5.89352	1.15208e-29	2.65705e-27
ERV316A3_10q26.12	72.0399	162.246	873.987	489.928	-4.98986	1.46378e-29	3.20715e-27
HML5_Xq21.33	7.84155	14.5721	231.206	247.969	-4.22293	1.895e-29	3.95422e-27
HERVH_7q21.3b	203.967	186.645	2.65693	12.6073	4.673	2.71189e-29	5.34951e-27
HERVH_8q24.23c	31.6562	52.0313	390.653	212.186	-4.53743	2.80782e-29	5.34951e-27
HERVH_2q32.1c	27.5025	54.845	318.102	175.377	-4.33392	3.10677e-29	5.67244e-27
ERV316A3_19q13.2	123.443	145.343	1025.99	708.778	-3.28811	3.6708e-29	6.19868e-27
ERVLE_1p31.1k	9.20504	23.2802	138.985	100.955	-3.84341	3.6779e-29	6.19868e-27
ERV316A3_6p25.1e	25.4516	96.1016	371.266	286.342	-4.55575	4.10348e-29	6.6598e-27
ERVLE_15q25.1f	93.3357	152.056	1026.72	768.262	-3.79637	9.86649e-29	1.54411e-26
ERVL_16p12.3	6.53269	15.7737	91.9805	55.1954	-3.33106	1.05826e-28	1.59907e-26
HERVP71A_12p13.33b	56.7946	134.111	851.039	848.694	-4.68139	1.61126e-28	2.35351e-26
HML2_7q11.21	18.7921	25.8203	177.534	97.0952	-3.45316	2.81657e-28	3.98136e-26
HUERSP3B_1p33a	144.613	321.285	1390.7	837.037	-5.02755	3.41913e-28	4.68207e-26
HERVP71A_6p21.1a	17.4684	26.277	194.115	99.6443	-3.76708	4.73712e-28	6.29032e-26
HML3_4q34.1a	55.5494	168.339	755.941	539.269	-5.25735	6.33802e-28	8.16859e-26
MER4B_Xq21.33	31.7769	76.5449	333.309	202.925	-4.25521	1.52801e-27	1.91307e-25
HERVS71_18q21.1	135.351	189.188	3.1331	5.54923	3.78527	2.51785e-27	3.06478e-25
ERVLB4_8q24.3d	17704.7	10984	2060.93	1086.36	2.90853	8.47365e-27	1.00356e-24
ERVL_22q12.3b	43.6215	53.1058	320.314	166.299	-3.15508	1.63986e-26	1.89102e-24
HERVL_3q25.32	16.2621	57.965	176.214	155.624	-3.65402	2.48089e-26	2.7875e-24
HERVL_4q32.1a	655.343	654.975	3389.61	1400.7	-2.7898	2.70597e-26	2.96439e-24
HERVH_6q23.2c	116.677	165.225	1237.42	759.84	-4.45019	3.95674e-26	4.22889e-24
LTR57_22q11.21	143.841	112.233	9.76943	9.89692	3.37179	4.63414e-26	4.83495e-24
HERVL_12q21.2c	84.4853	97.2164	893.972	657.094	-3.7312	5.98387e-26	6.09798e-24
HUERSP3_8q11.1	231.276	318.256	3.07268	5.32895	4.22104	6.1823e-26	6.157e-24
HERVL18_4q21.23	250.079	271.447	1.94673	4.39093	4.59212	6.49924e-26	6.32882e-24
HML3_3q13.11a	11.7731	43.1505	137.359	99.3273	-3.7326	6.69824e-26	6.3808e-24
HERVH_6q23.2b	90.3948	119.043	759.816	340.13	-4.04779	6.91143e-26	6.4438e-24
HERVIP10F_14q11.2c	35.5687	55.3888	255.03	107.679	-3.53197	7.96396e-26	7.27043e-24
ERV316A3_2q31.1b	94.3503	96.9599	1.32697	4.09085	3.64552	1.17049e-25	1.04676e-23
HML5_11q12.2	8.33913	23.775	189.806	178.372	-3.96961	1.34491e-25	1.16798e-23
HUERSP1_7q21.12	40.0325	119.396	795.658	940.776	-4.97713	1.35936e-25	1.16798e-23
MER61_18q12.3a	337.779	389.456	7.01929	10.4864	4.46616	1.40759e-25	1.18616e-23
LTR57_2q37.1	25.2904	116.313	190.401	131.121	-3.94418	1.61453e-25	1.33488e-23
ERV316A3_1q32.2a	111.71	192.018	1481.47	1045.94	-4.88185	3.16407e-25	2.5063e-23
ERVLE_5q12.3a	27.4707	31.1324	179.297	78.0889	-2.80645	3.17634e-25	2.5063e-23
HERVFRD_Xq21.33b	4.70245	12.9077	107.016	98.3615	-3.50853	3.20294e-25	2.5063e-23
MER101_1p35.2	12.288	23.1761	152.573	122.623	-3.55803	3.85159e-25	2.94073e-23
HERVH_9q34.13	102.729	143.047	708.304	351.538	-3.36567	3.89234e-25	2.94073e-23
ERVLE_1p35.2b	12.4902	23.9821	127.058	79.3248	-3.33227	4.15247e-25	3.08409e-23
ERVLB4_17q24.3	297.394	357.271	10.911	15.4746	4.00496	5.8956e-25	4.30575e-23
HML3_16p13.3	472.719	632.39	1928.39	691.945	-2.56804	6.96722e-25	5.00498e-23
HML3_13q12.11a	686.004	586.389	28.879	23.9742	4.2086	8.59639e-25	6.0757e-23
HERVEA_15q21.3	494.992	931.997	2779.61	965.065	-3.90121	9.48238e-25	6.59552e-23
MER61_4q21.23a	124.838	163.647	0	0	3.87939	2.2905e-24	1.56827e-22
HERVE_19p12	440.322	1124.34	3439.16	1919.82	-4.72942	2.57496e-24	1.73592e-22
HERVH_11q23.3b	40.6825	84.0535	358.319	204.873	-4.11673	3.67099e-24	2.43732e-22
ERV316A3_9q34.3b	38.7615	78.1487	338.343	246.062	-3.92649	4.00531e-24	2.61959e-22
ERVLB4_10p14	6.7302	18.5289	68.1251	42.6137	-2.98399	8.32123e-24	5.3623e-22
HERVH_10q22.3b	19.378	19.9534	115.84	53.119	-2.69927	9.3783e-24	5.9559e-22
HERVK14C_16p12.3	98.9798	226.956	617.062	323.537	-3.98734	1.03816e-23	6.49889e-22
HERVP71A_12p13.33a	33.2747	91.7004	339.832	276.439	-3.82066	1.41356e-23	8.72427e-22
HARLEQUIN_2q32.1	107.882	102.323	655.348	327.522	-3.1215	1.94698e-23	1.18496e-21
HERVL32_2q31.3	27.1644	65.3358	290.607	239.923	-4.077	2.00577e-23	1.20401e-21
HML3_4q34.1b	4.51211	16.0237	90.6374	83.4286	-3.28543	2.78018e-23	1.64632e-21
ERVL_Xq28b	134.734	146.057	0.841292	3.36962	3.90102	4.51257e-23	2.63654e-21
HML2_3p12.3	43.8053	141.805	315.027	248.777	-3.80114	5.26715e-23	3.03693e-21
ERVLB4_11p15.5c	252.508	319.881	1036.09	415.257	-2.54943	6.08969e-23	3.46559e-21
ERVLE_6p22.1a	215.278	281.969	5.47421	9.15204	3.95888	1.13529e-22	6.37801e-21
HERVH_17p11.2	63.9736	121.288	688.781	534.633	-4.66775	2.11603e-22	1.17373e-20
MER61_16p12.3	9.54985	24.8598	109.267	101.242	-3.29987	2.21725e-22	1.2145e-20
MER4_Xq21.33b	4.15104	8.01991	121.149	167.915	-3.2974	3.12267e-22	1.68933e-20
ERV316A3_3q27.1a	50.7417	69.6971	364.269	204.837	-3.35847	3.3217e-22	1.77509e-20
ERVLE_4q24g	15.9496	24.4365	119.489	90.4345	-2.92112	3.45588e-22	1.82454e-20
HERVK11_2q34a	79.7186	66.8962	403.337	189.421	-2.55778	4.6579e-22	2.42987e-20
ERV316A3_9q32a	7.53157	13.9171	78.0667	58.099	-2.8437	5.05402e-22	2.6055e-20
MER4B_12p13.31c	1003.38	1238.99	4349.41	2223.82	-2.80237	5.70516e-22	2.90698e-20
HERVI_7q33c	1272.98	3178.13	3.1768	5.52785	5.40622	6.96486e-22	3.50805e-20
ERVLB4_2q32.3	77.0933	109.63	374.751	145.681	-3.19046	7.45167e-22	3.71059e-20
HERV4_15q26.1	211.922	248.191	3.24203	6.93544	4.08188	9.64898e-22	4.75077e-20
HERVL40_7q21.12b	668.753	394.445	2684.8	1183.27	-2.11549	1.14278e-21	5.56406e-20
ERV316A3_4q22.1a	77.9051	85.7735	1.11889	3.42841	3.19315	1.25618e-21	6.04899e-20
ERVLB4_Xq21.33a	2.46632	6.86021	39.765	35.1864	-2.49053	1.36805e-21	6.51609e-20
ERV316A3_13q13.3c	287.093	244.162	5.85397	13.1879	4.35904	1.58303e-21	7.45896e-20
HERVH_Xq21.33a	102.09	142.741	454.216	166.788	-3.08358	1.77515e-21	8.27522e-20
HERVL74_7q21.3a	31.5538	28.6072	0	0	2.54893	2.11124e-21	9.73835e-20
HERVH_20q13.12c	66.6406	73.3888	408.89	249.974	-3.22418	2.31722e-21	1.05771e-19
HERVL_4q13.2b	59.0689	61.5513	0	0	3.06227	3.44407e-21	1.55587e-19
HERVK11_1p33	7.19683	16.5799	76.6197	58.5982	-3.0196	3.74445e-21	1.67431e-19
HERVW_1p33c	11.2826	25.3906	98.8763	90.7769	-3.06805	5.82159e-21	2.57679e-19
MER61_5q32	216.787	211.412	1.47194	5.43868	4.29405	6.16124e-21	2.69986e-19
ERVLE_15q21.2	328.55	477.788	15.7937	25.8967	3.75669	8.52089e-21	3.69689e-19
HERVH_6q11.1a	3.04557	7.32254	40.7183	29.3087	-2.44701	1.03296e-20	4.43769e-19
HERVH_9p24.2a	146.706	757.479	414.366	286.24	-3.84199	1.45131e-20	6.1744e-19
ERVLE_22q13.31d	60.7602	63.1493	0.176586	1.21061	3.04908	2.04046e-20	8.59739e-19
PABLB_14q11.2a	23.9354	40.2658	142.233	76.0295	-3.01736	2.49366e-20	1.04069e-18
HERVK11D_2q31.1	32.52	68.0555	234.221	179.057	-3.49057	2.60551e-20	1.07711e-18
ERVLB4_3p14.2	527.932	616.655	20.2769	23.7107	3.94881	2.87625e-20	1.17792e-18
HUERSP1_8q21.13	208.355	454.885	0.207286	1.42108	3.86498	3.12689e-20	1.26871e-18
HERVH_11q13.2b	12.6914	31.788	146.953	107.076	-3.49749	3.44445e-20	1.38473e-18
ERVLE_15q25.3b	1798.59	1810.23	5622.05	2119.22	-1.98732	3.92263e-20	1.56263e-18
HML2_17p13.1	173.341	348.454	1776.61	2325.1	-4.6045	4.45969e-20	1.76057e-18
HERVL_6q24.1g	83.0993	84.3957	0.722288	2.81819	3.26932	4.71899e-20	1.84631e-18
HERVEA_19p12a	16.4118	42.8593	110.714	78.861	-3.17118	5.55989e-20	2.15606e-18
ERV316A3_5p15.32a	161.426	171.586	0.341502	1.75421	3.86018	5.67138e-20	2.18e-18
ERV316A3_1q24.2b	73.8316	69.5312	3.44163	6.37909	3.03217	5.89027e-20	2.24445e-18
HERVK11D_5p13.2	23.6012	41.8073	149.058	94.633	-3.13769	6.74149e-20	2.54666e-18
PRIMA4_1q24.3	66.7334	92.3529	2.02499	4.60705	2.92494	1.02792e-19	3.84987e-18
HERVL_Xq21.33a	4.34197	11.3923	158.279	223.248	-3.5336	1.13502e-19	4.21367e-18
ERV316A3_8p21.2b	3.28469	10.8786	61.7295	44.8313	-2.83817	1.14429e-19	4.21367e-18
ERVLE_Xq26.2a	271.388	304.206	0.803723	4.76749	4.39995	1.49053e-19	5.44291e-18
LTR25_3q26.33a	225.021	418.864	1.104	4.30533	3.80638	2.35837e-19	8.54082e-18
HERVH_7p14.3f	97.6295	92.8678	5.4223	7.97912	3.08203	2.69777e-19	9.68985e-18
HERVFRD_6p24.2	141.94	217.07	695.44	485.349	-2.64115	3.36888e-19	1.2002e-17
ERVLE_8q13.2a	5.49059	11.8483	47.1883	30.0285	-2.50215	3.48006e-19	1.22981e-17
HUERSP1_15q22.31	14.6844	23.9619	81.6254	47.8204	-2.67929	3.62754e-19	1.27167e-17
PABLA_8q24.3	177.099	258.348	7.44248	9.14562	3.37964	3.69058e-19	1.2835e-17
LTR25_6q24.1	91.6576	106.769	1.48164	3.45781	3.22552	3.73834e-19	1.28987e-17
MER4_5p13.2b	234.427	684.618	1015.69	545.811	-4.3534	3.96221e-19	1.35644e-17
HERVH_7p21.1a	182.505	244.045	880.036	451.071	-3.38762	4.77191e-19	1.62097e-17
HERVP71A_6p21.1b	17.4088	27.9279	150.813	99.3558	-3.22305	4.9793e-19	1.67841e-17
ERVLE_3p24.3a	5.46934	16.0514	78.2397	77.6883	-2.84485	5.2534e-19	1.75728e-17
HERVI_16p13.13	339.225	398.862	2010.54	1485.8	-2.8088	7.79986e-19	2.58932e-17
MER4_3q29f	6899.8	4305.24	2077.49	722.481	1.57051	8.15032e-19	2.68532e-17
HERVL_Xq21.33b	2.39324	6.94669	55.8887	69.3494	-2.66148	8.55683e-19	2.79821e-17
HERVH_21q22.2	21.1184	75.4577	112.667	78.7821	-3.2789	9.46074e-19	3.07089e-17
HERVL18_4q21.1	403.386	651.973	7.87498	8.18894	3.83502	9.72557e-19	3.13363e-17
HERVL74_6p25.1	1715.49	997.11	466.377	268.387	1.80657	1.41358e-18	4.5214e-17
PABLA_7q32.1	249.62	316.161	5.8212	8.96784	3.83013	1.57386e-18	4.98085e-17
MER41_1q44a	59.4385	49.206	204.914	88.8046	-1.9975	1.57996e-18	4.98085e-17
HERVE_2q37.1	2648.68	4123.66	8593.92	4087.06	-2.47987	1.73239e-18	5.42239e-17
MER34B_7q36.1	8.23015	12.3387	58.205	39.4771	-2.49278	1.9333e-18	6.0083e-17
ERVLB4_17q25.1	236	231.915	1113.27	645.921	-2.7289	2.13569e-18	6.59056e-17
PRIMA41_4q34.2	2.77551	15.9563	31.2614	23.9234	-2.29614	2.43126e-18	7.4502e-17
ERVL_14q12	74.1399	90.5848	0.770705	2.11761	2.99984	2.62793e-18	7.99694e-17
MER101_7q36.1a	18285.8	7354.58	7772.27	2647.74	1.19793	2.71968e-18	8.21907e-17
ERVLB4_5q12.3a	13.2301	14.9643	84.3799	59.1371	-2.51052	2.76092e-18	8.28653e-17
HERVE_11p15.4	2257.61	3208.5	8672.1	4264.58	-2.66642	3.09024e-18	9.21184e-17
ERVLE_1q32.2a	23.4753	44.1941	155.495	124.262	-3.08649	3.33297e-18	9.86829e-17
ERV316A3_8q21.13j	173.567	322.162	0.54815	2.59228	3.52925	3.46918e-18	1.01587e-16
HERVW_3p24.3	52.6075	216.46	410.537	413.752	-3.92411	3.47744e-18	1.01587e-16
HERVL18_5q21.2	49.3269	73.8409	0.0772334	0.529485	2.66804	3.54259e-18	1.02806e-16
MER101_3q26.31	93.2453	77.4638	10.9827	12.5749	2.68279	3.79767e-18	1.09483e-16
HERVH_4q22.3a	187.793	182.237	770.884	401.252	-2.46531	4.01843e-18	1.1509e-16
ERVLE_11p15.5a	82.3333	80.4644	6.83787	7.76322	2.6952	4.22473e-18	1.20213e-16
ERVLE_11p15.3	61.6608	60.422	1.40183	4.50887	2.86059	5.52329e-18	1.56149e-16
HERVFH21_8q11.21	75.0689	104.007	306.932	151.969	-2.76052	5.61043e-18	1.57596e-16
HERVS71_7q33	1820.56	2881.69	18.2078	41.2602	5.28635	5.74028e-18	1.60216e-16
HERVE_11q13.2b	4787.12	8650.24	14998.5	6234.01	-2.70692	6.62449e-18	1.82922e-16
HARLEQUIN_5q12.3	444.472	614.326	1.72523	4.65714	4.3769	6.63727e-18	1.82922e-16
HML3_12q13.11	96.8233	334.947	0.768032	2.55399	2.8742	6.70908e-18	1.83745e-16
ERV316A3_6p21.2a	13.0672	16.5427	82.5082	57.7466	-2.51887	1.23897e-17	3.37214e-16
HERVH_6q23.2a	25.3876	41.0243	165.702	102.819	-3.18539	1.3012e-17	3.51966e-16
ERV316A3_1q25.2b	4.11318	14.1524	39.4761	29.5886	-2.32272	1.50519e-17	4.04647e-16
ERV316A3_6p22.1i	224.608	333.228	911.932	465.484	-3.23831	1.51963e-17	4.06038e-16
ERVLE_6q22.31c	0.966349	4.37815	23.2366	20.3004	-1.97704	1.75067e-17	4.64935e-16
HERVH_3p26.3b	4.96706	12.1717	53.4335	40.0937	-2.59611	2.11288e-17	5.5775e-16
ERVLB4_1p34.2b	56.1165	86.2519	1.63979	4.28356	2.63428	2.20498e-17	5.78576e-16
ERVLE_7q31.32g	16.5586	43.6906	98.9104	80.1619	-2.78646	2.30333e-17	6.00786e-16
HERVL_1p22.1b	367.826	277.711	1493.17	1022.01	-2.1059	2.489e-17	6.45372e-16
ERV316A3_12p12.3a	5.11467	10.5604	61.1144	53.8915	-2.53196	2.57633e-17	6.64087e-16
HERVH_19q13.32b	908.704	1516.14	34.2089	178.249	4.81562	3.74781e-17	9.60405e-16
ERVLE_22q13.31e	71.3531	109.385	0	0	2.88713	4.96381e-17	1.26462e-15
HERVIP10F_22q13.2	50361.1	33117.5	15938.8	7053.69	1.50394	5.73341e-17	1.45224e-15
ERVLE_11q24.2a	3.96929	8.6806	36.2987	26.6005	-2.24059	8.1601e-17	2.05503e-15
HERVH_6q25.2a	9.35288	20.7481	60.4562	46.92	-2.47179	8.265e-17	2.06956e-15
HERVH_19q13.32a	217.833	361.936	6.73447	18.4255	3.55788	1.11174e-16	2.76798e-15
MER4_Xq21.33a	30.5957	99.1728	594.345	747.143	-4.45341	1.16237e-16	2.87769e-15
HERVIP10F_2p12	57.685	92.0844	1.11634	5.20755	2.7036	1.25483e-16	3.08914e-15
HERVL_3q26.1e	29.9143	37.0151	0	0	2.27508	1.42008e-16	3.47642e-15
HERVH_Xq22.2a	50.6152	111.533	257.334	184.583	-3.07778	1.44261e-16	3.51196e-15
ERV316A3_5p13.3e	105.567	81.1397	20.6314	17.0092	2.21292	1.49748e-16	3.6254e-15
HUERSP3_2q14.1	32.9088	46.2524	0.0750548	0.51455	2.29197	1.50603e-16	3.62605e-15
HERVH_7q31.2	20.3641	32.153	111.248	85.3697	-2.60077	1.67805e-16	4.01816e-15
HML1_10q22.1	51.3056	87.0898	0.976475	3.70748	2.52944	1.85126e-16	4.40882e-15
HML1_6q22.32	110.05	135.69	465.124	334.421	-2.38837	1.94408e-16	4.60485e-15
ERVLE_8q24.3h	774.553	581.645	161.35	85.1944	2.02944	1.97479e-16	4.65245e-15
HERV3_19q13.33	46.149	70.7637	245.649	199.209	-2.81894	2.10076e-16	4.92275e-15
HERVH_7q11.21	7124.21	5884.57	1645.62	940.837	1.91262	2.39151e-16	5.57425e-15
HERVW_1p33b	2.42055	5.74133	37.3471	34.8701	-2.23101	2.54291e-16	5.89579e-15
ERV316A3_4p16.1f	21.3154	21.2008	1.16446	3.28053	1.969	2.62155e-16	6.04613e-15
HERVW_6q24.2b	1.86017	6.38742	34.4363	32.9373	-2.17742	2.83324e-16	6.50014e-15
ERVLB4_3q25.31a	53.9711	62.8515	235.756	150.656	-2.59676	3.071e-16	7.00892e-15
ERVL_6q16.1d	99.1106	180.222	0.82042	2.87624	3.0049	3.38603e-16	7.68786e-15
HERVEA_3q25.32	141.472	232.959	505.963	269.259	-2.67474	3.49922e-16	7.90392e-15
MER61_6q22.33	29.7405	35.2752	0.63881	2.24551	2.21409	3.79797e-16	8.53472e-15
HERVIP10F_2q34	1.28442	5.05339	33.2556	33.3354	-2.20773	4.2833e-16	9.57623e-15
HERVH_13q31.1a	15.5602	64.9175	120.193	98.281	-3.19401	5.26949e-16	1.17213e-14
HERVL_4q34.1d	2.66044	9.41304	49.3583	55.2148	-2.44407	5.83872e-16	1.29219e-14
ERVLB4_7q36.1a	23.9892	40.2874	104.734	63.3406	-2.40602	6.34401e-16	1.39696e-14
HERVL_14q22.3b	505.091	516.976	23.1141	26.7133	3.65389	6.7821e-16	1.48596e-14
HERVH_9q22.33b	3.39616	8.64793	46.0055	40.099	-2.36378	8.25798e-16	1.79309e-14
HML6_19p12e	745.462	1363.56	2529.63	1449.67	-3.32422	8.26571e-16	1.79309e-14
PABLA_2p25.1	554.495	633.232	73.2833	44.783	2.56288	8.3653e-16	1.80575e-14
ERV316A3_12q24.13	223.61	243.945	1009.45	1163.89	-2.28932	8.5648e-16	1.83975e-14
HERVH_3p21.31a	115.352	64.7711	419.63	294.626	-1.78981	9.28696e-16	1.98514e-14
ERVLE_3q26.2	151.825	165.75	15.133	14.0536	2.7145	1.08144e-15	2.30043e-14
HERVE_9q34.3	190.641	255.187	589.783	241.157	-2.36003	1.12928e-15	2.39058e-14
HERVE_4p16.1c	199.641	239.798	778.504	527.826	-2.80182	1.21219e-15	2.55377e-14
HERVH_3p21.31e	243.053	454.629	630.484	246.393	-2.53141	1.42935e-15	2.99685e-14
HERVH_9q22.32	50.9204	57.114	3.30275	8.79676	2.51818	1.46835e-15	3.06396e-14
HERVH_12p13.32	286.582	476.273	887.128	834.908	-3.88199	1.55796e-15	3.23554e-14
HERVE_17q11.2	1093.37	967.04	3485.83	1762.8	-2.07675	1.5693e-15	3.24372e-14
HERVH_8p11.23	11.8447	15.8018	76.929	67.1674	-2.39851	1.64206e-15	3.37817e-14
ERVLB4_2p25.3	61.6198	70.7357	8.54828	10.4509	2.28631	1.70089e-15	3.48285e-14
ERV316A3_8q13.3a	5393.2	3370.76	1818.56	1113.81	1.521	1.78655e-15	3.64124e-14
ERVLB4_17q21.32	460.879	407.178	1264.33	517.661	-1.97146	1.95983e-15	3.97591e-14
ERVLB4_9q22.2b	52.3179	66.6035	5.13217	8.02109	2.37646	1.97995e-15	3.99823e-14
HERVE_10p13b	104.023	181.99	1.39655	5.84632	2.98533	2.03561e-15	4.09176e-14
HERVH_6q22.1c	197.373	168.989	27.9757	24.8747	2.5412	2.08024e-15	4.16238e-14
ERVLE_1p13.3b	8.75578	23.6636	50.4717	45.9048	-2.33184	2.34862e-15	4.67802e-14
MER41_5q32	202.548	298.339	3.65244	5.43149	3.28808	2.8162e-15	5.58397e-14
ERVLB4_22q11.1b	42.4306	60.7668	0.179929	1.23353	2.39996	2.98953e-15	5.90096e-14
HERVIP10F_16p13.13	141.033	148.537	850.456	909.602	-2.46571	3.37735e-15	6.63657e-14
PABLA_19q13.32	79.7911	120.914	1.44479	3.19361	2.74501	3.67435e-15	7.18795e-14
ERV316A3_6q22.31b	1.4376	5.24702	22.1162	17.3055	-1.86673	3.7737e-15	7.34949e-14
HERVH_3p22.3b	94.2387	84.5684	290.943	133.17	-1.96265	3.80445e-15	7.3766e-14
HML2_3p25.3	34.7989	159.284	117.169	104.596	-2.80951	4.16972e-15	8.0492e-14
HML6_14q12b	53.5089	60.4371	0.341557	1.64216	2.62044	4.67347e-15	8.98208e-14
HUERSP3_5q21.2	29.166	38.0077	0	0	2.16541	4.89838e-15	9.37322e-14
MER4B_2p23.1	3.8281	8.27575	31.2952	25.5807	-1.97101	5.06854e-15	9.65668e-14
HERVL18_15q21.3	18.376	43.3268	130.22	128.866	-2.94265	5.25847e-15	9.97516e-14
HERVH_4q32.3d	546.635	2652.34	0.218387	1.09925	3.65932	6.91245e-15	1.30562e-13
MER4_Xq21.33d	3.52424	7.88465	38.8643	34.8191	-2.17406	7.02938e-15	1.32201e-13
MER41_9q21.12	269.309	1050.67	390.538	352.64	-3.35578	7.46103e-15	1.39719e-13
HERVE_2q24.1a	121.099	220.627	0.799635	2.97175	3.0361	7.58083e-15	1.41358e-13
ERVLE_11q14.2a	158.872	219.918	414.135	154.514	-1.97966	7.94673e-15	1.47553e-13
HERVL40_14q13.1b	10.574	13.956	69.9917	48.7275	-2.29448	8.05391e-15	1.48912e-13
HERVL32_1p31.1a	15.0244	16.948	0	0	1.73621	8.12018e-15	1.49507e-13
ERVLE_11q23.3c	160.425	203.638	628.669	355.801	-2.59758	8.28947e-15	1.51985e-13
ERVLE_20q13.33b	192.491	293.48	16.5577	16.561	2.68497	9.42972e-15	1.72171e-13
MER41_22q12.3e	996.478	782.699	249.37	179.921	1.88917	9.62914e-15	1.75082e-13
HERVH_17q22b	62.8906	101.661	1.74619	4.65966	2.5558	1.01726e-14	1.842e-13
HUERSP3_3q29	58.5384	119.769	0.918693	2.28991	2.3708	1.14619e-14	2.06692e-13
MER41_6q23.2	5.74591	12.4535	43.9203	35.4375	-2.25025	1.23936e-14	2.22577e-13
HERVK11_22q11.21	54.7671	60.3946	187.43	121.347	-1.8861	1.26158e-14	2.25643e-13
ERVLE_17q21.31	61.3281	85.2787	2.64276	5.00689	2.46251	1.4608e-14	2.60212e-13
ERV316A3_4q31.23c	40.7289	75.4723	141.199	92.5677	-2.55697	1.48947e-14	2.64246e-13
HERVH_6p23	37.2357	88.0824	289.49	224.819	-3.48671	1.50724e-14	2.66319e-13
HERVL_9q22.32	262.268	455.999	2.44663	6.0021	3.45188	1.52736e-14	2.6879e-13
HERVL18_2p12	45.3538	58.3629	0.356871	2.44658	2.45273	1.61586e-14	2.83227e-13
MER4_4p12b	239.804	262.482	22.0289	20.2251	2.84543	1.67841e-14	2.92153e-13
HERVE_2p13.3a	201.024	509.277	8.89465	14.5032	2.91267	1.68011e-14	2.92153e-13
HUERSP3_2q24.2	57.8443	96.2787	307.833	300.321	-2.82253	1.73657e-14	3.00776e-13
ERV316A3_21q22.3b	684.834	903.834	2141.55	1095.82	-2.51395	1.91853e-14	3.30984e-13
HERVL40_6q14.1	41.5549	57.5597	0.679646	2.88017	2.33424	2.00947e-14	3.45314e-13
MER4_8q24.3e	81.162	144.573	3.7797	7.70668	2.61168	2.13529e-14	3.65502e-13
HML2_11q23.3	46.2863	103.387	167.469	100.687	-2.78875	2.164e-14	3.68975e-13
ERV316A3_10q22.1a	19.2344	20.4431	89.41	64.3409	-2.26469	2.25309e-14	3.82676e-13
HERVP71A_10q25.1	177.204	320.381	1.29156	5.21106	3.27799	2.86209e-14	4.84235e-13
ERV316A3_1q42.12b	553.356	730.141	50.7233	54.0915	2.97022	2.93532e-14	4.94714e-13
ERVLB4_9q22.33c	14.638	17.6435	0	0	1.70736	2.9765e-14	4.99733e-13
MER4_5p14.3b	78.5012	131.937	0.218387	1.09925	2.66172	3.12708e-14	5.2301e-13
ERVLE_1q23.2b	343.272	167.841	690.191	187.343	-1.05407	3.13903e-14	5.23013e-13
HERVL_5q12.3	319.584	363.879	71.6424	54.5867	2.09172	3.26633e-14	5.42161e-13
ERV316A3_14q13.3	1.00985	3.20319	28.0893	28.0202	-1.96517	3.45989e-14	5.72122e-13
HERV9_6p21.2	19.2031	29.2347	93.6982	153.091	-2.28288	3.56446e-14	5.87198e-13
ERVLE_4q21.1b	89.5648	101.186	286.413	140.527	-2.08634	5.41339e-14	8.88444e-13
HERVH_5q23.2a	775.321	1102.94	2555.8	1687.5	-2.89994	5.55193e-14	9.07782e-13
HUERSP3_8q23.3	26.6931	34.7516	0	0	2.0615	5.80281e-14	9.45276e-13
ERVLE_8q24.22b	218.051	298.374	684.168	448.459	-2.05844	6.03859e-14	9.80041e-13
HERVP71A_12p13.31b	897.137	489.786	326.697	173.116	1.37914	6.07708e-14	9.82647e-13
HUERSP3B_3q28a	22.2179	34.6025	123.156	110.214	-2.606	6.20539e-14	9.99707e-13
HERVIP10FH_2q14.2	600.553	3177.28	3862.43	7633.35	-4.74325	6.40723e-14	1.02844e-12
HERVH_15q25.3a	7.08025	15.2993	47.9543	43.3494	-2.24802	7.14086e-14	1.14202e-12
HERVH_6p22.3d	75.8498	158.336	320.867	259.32	-3.0701	7.4607e-14	1.18883e-12
HERVL_8q22.2	113.742	173.439	310.083	148.147	-2.11726	7.84297e-14	1.24521e-12
ERV316A3_5q14.3e	14.8369	34.5843	134.698	233.258	-2.67079	7.9962e-14	1.26496e-12
ERV316A3_3p21.31c	6.75731	12.8513	39.2071	29.2202	-1.97782	8.25217e-14	1.30076e-12
HERV30_8q24.23	0.630267	2.51844	20.9362	20.6532	-1.767	8.55498e-14	1.34365e-12
HERVL74_3q13.2a	38.0511	53.0414	0.152494	1.04545	2.26786	8.96102e-14	1.4024e-12
ERV316A3_13q14.13	26.1364	27.153	100.842	76.0877	-2.0165	9.11344e-14	1.42118e-12
ERVLB4_4q24g	23.6239	32.0672	0.152494	1.04545	1.93177	9.55134e-14	1.48418e-12
MER4_4q25b	28.193	37.2035	247.424	293.985	-2.73677	9.86583e-14	1.52764e-12
MER4_5p13.2a	10.3037	19.4619	56.6809	49.1165	-2.2207	1.24978e-13	1.92836e-12
HERV9_7p14.2	42.542	70.3558	116.842	64.2558	-2.15221	1.26525e-13	1.94537e-12
HERVL40_11q13.4b	75.7645	56.9978	198.708	80.9513	-1.61055	1.3245e-13	2.02936e-12
ERVLE_1q42.12a	231.117	241.631	29.3804	20.7173	2.43837	1.33767e-13	2.04239e-12
MER101_1q42.13a	459.281	352.886	93.0829	80.2065	2.18522	1.76267e-13	2.68196e-12
ERV316A3_2p25.3b	65.7488	42.0575	15.5284	10.3962	1.75327	1.7977e-13	2.72578e-12
HERVEA_Xp11.21	890.314	3740.57	1238.05	633.34	-2.27718	1.82538e-13	2.75821e-12
ERV316A3_18p11.32c	37.4851	50.12	1.49096	4.91757	2.18316	1.95051e-13	2.93716e-12
MER61_13q22.1	119.357	258.537	1.70144	4.45341	2.7521	2.02871e-13	3.04445e-12
ERV316A3_22q12.3b	2996.08	4377.55	1.97354	4.96783	5.47553	2.11183e-13	3.15838e-12
HERV4_4q12	422.777	431.296	1067.89	525.331	-1.8043	2.3475e-13	3.49889e-12
LTR25_1q22	204.945	212.188	28.9827	28.9255	2.5127	2.4722e-13	3.67227e-12
MER4_4p12a	549.42	602.731	54.9198	39.6842	2.60729	2.49378e-13	3.69181e-12
HERVH_3q25.1	54.1835	47.3668	8.18983	9.32488	2.07504	2.55803e-13	3.76497e-12
MER101_11q13.2	90.466	118.648	5.13806	7.88162	2.56474	2.56039e-13	3.76497e-12
HERVL_6q11.1b	2.4451	4.42857	26.3349	23.8275	-1.7363	2.74641e-13	4.025e-12
MER61_6q24.1c	24.1653	34.5044	0.288184	1.40998	1.89308	2.86494e-13	4.18472e-12
PABLB_7q11.21	141.978	301.402	13.5869	39.2956	2.79915	2.90113e-13	4.2235e-12
MER4_20q13.13	22.0128	23.2285	122.943	156.055	-2.24228	3.01409e-13	4.37343e-12
HERVL_12q12b	164.303	208.19	20.4261	14.7012	2.25661	3.21613e-13	4.65118e-12
ERVLE_5q22.1c	31.4798	33.5968	1.19079	3.45251	2.08145	3.34438e-13	4.82074e-12
HERVH_7q31.33c	1.49628	5.14235	29.3765	32.1209	-1.92575	3.95144e-13	5.67711e-12
HERVH_2p12d	47.4427	63.1531	0.975889	4.42976	2.40131	4.00636e-13	5.73721e-12
HERVFRD_1p31.1b	143.033	148.606	5.17047	7.88042	3.05111	4.02533e-13	5.7456e-12
ERVLE_7q21.3a	18.2169	26.5486	0.115448	0.791473	1.72767	4.11608e-13	5.85606e-12
HERVH_9q21.12	18.7067	91.9751	75.5319	94.3946	-2.55283	4.27434e-13	6.06154e-12
HERVH_3q27.3a	240.153	390.623	2.81278	12.5934	3.37526	4.56536e-13	6.45336e-12
HERV30_10q21.1	274.818	650.353	1.97886	5.30967	3.27994	4.61071e-13	6.4965e-12
LTR25_3p22.1	175.729	127.848	403.432	139.485	-1.46766	4.94025e-13	6.93851e-12
HERVH_4q13.2	251.599	323.188	27.8134	29.1323	2.76365	5.36003e-13	7.50405e-12
MER4_14q12b	28.4723	54.8806	84.8823	48.4035	-2.24311	5.4747e-13	7.64017e-12
HERVFRD_7q21.3	57.8243	109.58	165.49	116.602	-2.21867	5.81155e-13	8.08451e-12
MER4_12q12a	12.7706	18.7478	74.8752	78.165	-2.31348	5.85953e-13	8.12546e-12
HML6_2q14.3	4.21122	10.9826	36.5568	32.5201	-2.02697	6.11348e-13	8.45087e-12
LTR19_4q35.1	21.0859	22.8665	110.403	100.761	-2.22533	6.15337e-13	8.47927e-12
HERVEA_4q28.3	4.67773	18.3322	32.2083	27.1981	-2.01841	6.3009e-13	8.65535e-12
MER4_2q14.1b	119.618	99.0509	28.0853	24.3887	1.99357	7.12171e-13	9.75229e-12
PABLB_12p11.21	30.7976	37.6643	1.79196	3.85007	1.98534	7.23429e-13	9.84817e-12
MER61_13q14.2	123.138	116.346	351.47	203.178	-1.71604	7.23667e-13	9.84817e-12
ERV316A3_4q13.2b	16.9099	22.7469	0	0	1.6976	7.40849e-13	1.00508e-11
ERVLB4_3q11.2f	98.7077	126.407	3.82737	8.2324	2.73456	8.58156e-13	1.16063e-11
HERVH_15q25.2	127.668	140.133	12.9017	13.8041	2.61803	9.17197e-13	1.23666e-11
ERV316A3_3q12.1d	56.7169	54.6032	9.79995	12.5559	2.07168	1.02069e-12	1.37199e-11
HERVL40_4q31.3a	72.1684	49.0354	214.802	151.079	-1.60642	1.03543e-12	1.38753e-11
ERVLB4_Xq21.2	148.687	359.357	0.181789	1.24628	2.84174	1.22083e-12	1.631e-11
MER4_12q12e	7.43878	18.0101	37.4774	33.3875	-1.99741	1.22921e-12	1.63721e-11
MER41_8q24.3	41.6706	67.8067	1.78691	6.13334	2.17444	1.24129e-12	1.64828e-11
ERVLB4_15q21.2	122.177	82.1125	391.663	302.192	-1.62077	1.25956e-12	1.66749e-11
HERVL18_6q14.1	16441.6	38788.7	97.8905	184.63	5.68098	1.28253e-12	1.69278e-11
HERVS71_19p13.3	153.612	130.809	426.231	270.721	-1.75352	1.32331e-12	1.74136e-11
MER61_10q26.12	258.578	543.321	536.9	353.394	-3.27588	1.4578e-12	1.9126e-11
HML3_3q13.33	21.9494	31.933	0.117489	0.805462	1.79994	1.57694e-12	2.06273e-11
ERV316A3_3q13.31b	96.5607	103.447	3.59667	5.65912	2.67932	1.63324e-12	2.12656e-11
LTR57_9q22.32	62.5711	74.8751	3.08538	5.4312	2.37196	1.63544e-12	2.12656e-11
ERVLB4_2q21.1c	193.869	180.559	25.1209	16.5276	2.25635	1.64328e-12	2.13043e-11
MER4_5q35.2d	129.028	220.244	0.41741	1.70297	2.84974	1.69635e-12	2.19275e-11
HERVE_7p22.1c	860.527	894.255	2443.41	1566.96	-1.90748	1.84796e-12	2.38169e-11
ERVLB4_7p13	5.43827	16.2767	43.6533	48.2036	-2.14144	1.92752e-12	2.47695e-11
MER41_9q31.1c	117.095	292.396	406.519	383.355	-2.37423	2.02864e-12	2.59927e-11
ERVLB4_3q26.33b	27.9312	45.0713	0.117489	0.805462	1.95277	2.18334e-12	2.78933e-11
ERVLE_14q21.3e	126.987	76.9912	38.1135	22.4644	1.63518	2.23758e-12	2.84759e-11
ERV316A3_21q22.3e	659.872	386.751	217.301	134.742	1.56471	2.24763e-12	2.84759e-11
HERVH_4q31.21b	1094.54	2171.31	0.996669	2.9854	4.15419	2.24844e-12	2.84759e-11
HERVIP10FH_8q21.3	28.9544	35.9655	0.915263	3.21074	1.99525	2.40306e-12	3.03464e-11
ERV316A3_4q31.23b	3.99921	12.4793	29.8763	25.9806	-1.91351	2.64728e-12	3.33345e-11
ERV316A3_4p16.1g	19.1617	22.2726	1.12604	3.92544	1.74583	2.79852e-12	3.51378e-11
HERVH_2p22.2c	140.106	495.309	382.514	355.617	-2.64847	2.90838e-12	3.64129e-11
HML6_12p11.21	20.1023	24.4532	2.12859	5.02178	1.68283	2.96593e-12	3.70276e-11
HML4_19p12	11.3945	23.5814	49.3088	38.3004	-2.05198	3.3822e-12	4.21046e-11
MER101_7q22.1b	104.609	101.595	27.1795	22.935	1.80421	3.56703e-12	4.41635e-11
ERV316A3_10q23.33	4.47462	8.25759	36.8978	56.7452	-1.8411	3.57331e-12	4.41635e-11
ERV316A3_1p32.1c	24.0589	37.7932	0.264468	1.2727	1.81134	3.57783e-12	4.41635e-11
HUERSP2_3q26.33	7.6131	18.8192	34.1367	23.9156	-1.92426	3.59946e-12	4.41851e-11
HERVH_2q33.2	28.6671	61.8745	112.169	92.691	-2.37134	3.59975e-12	4.41851e-11
ERVLE_2q11.2b	557.993	244.573	267.594	88.9824	1.00438	3.63545e-12	4.44987e-11
ERVLB4_15q25.3a	4.93576	19.6228	32.3505	32.1282	-1.95263	3.86853e-12	4.72197e-11
HERVH_11q25a	52.2771	195.904	1164.73	1193.53	-4.76868	3.96306e-12	4.82393e-11
ERVLB4_12p13.32	26.6016	37.2187	0.183169	1.25574	1.91523	4.04992e-12	4.91599e-11
LTR23_4p16.3b	24.8187	32.6741	0.953891	3.60685	1.88086	4.08087e-12	4.93988e-11
HUERSP1_11p15.4b	85.5801	72.8914	227.928	123.206	-1.80201	4.69055e-12	5.66226e-11
MER4_13q32.3a	95.9806	99.3159	22.0088	16.7446	1.82811	4.72894e-12	5.69291e-11
MER4_13q12.12c	724.806	851.021	103.416	90.4784	2.37538	5.51608e-12	6.62232e-11
ERVLE_22q13.31c	16.1624	23.0284	0	0	1.63327	6.20953e-12	7.43447e-11
ERVLE_4q22.1a	12.6797	13.9943	0.550862	2.26867	1.49979	6.2376e-12	7.44773e-11
MER41_22q12.3c	19.6793	22.8017	79.946	58.6192	-1.98184	6.32957e-12	7.53701e-11
PRIMA41_5p12	23.3229	24.7806	2.56528	5.34105	1.75701	6.51711e-12	7.73929e-11
HARLEQUIN_5q23.1	13.4069	17.4106	51.6495	36.179	-1.86885	6.80472e-12	8.059e-11
ERV316A3_5p14.1b	53.7539	77.4279	0.713741	4.89316	2.34642	7.00345e-12	8.272e-11
HERVH_16q22.1	65.674	209.189	262.616	232.837	-2.91977	7.07489e-12	8.33392e-11
HERVH_Xq26.2	247.037	338.127	27.7035	27.3965	2.64831	7.1507e-12	8.40063e-11
ERV316A3_1q32.2e	19.651	25.5158	0	0	1.7946	7.23093e-12	8.47217e-11
HERVL_3q11.2c	263.257	576.709	0	0	3.11064	7.35626e-12	8.59604e-11
HERVFH21_1q23.1	159.608	544.448	295.051	245.72	-3.16768	7.44967e-12	8.68204e-11
ERV316A3_1q21.3b	11.6434	35.0653	53.373	48.5852	-2.16623	7.51967e-12	8.74037e-11
MER101_1q21.3	31.7933	54.9525	0.132039	0.90521	1.95185	7.94347e-12	9.19555e-11
MER101_1p31.3	23.5333	27.6692	66.4373	28.8465	-1.6977	7.95325e-12	9.19555e-11
MER41_5q31.3a	14.9712	16.2015	67.2232	54.3801	-1.94897	8.32029e-12	9.59461e-11
HERVH_6q24.1b	50.2525	83.5954	2.80249	7.37635	2.19725	9.49451e-12	1.09199e-10
MER4B_5q14.3	29.1178	45.4774	0.688275	4.71857	1.92747	1.08587e-11	1.24562e-10
ERVLE_7q31.32f	12.3261	38.2775	61.8796	61.3672	-2.1699	1.08978e-11	1.24684e-10
ERV316A3_14q12d	22.3172	26.9808	0.89553	5.02306	1.8413	1.09336e-11	1.24768e-10
HERVH_1p31.1e	26.8951	40.1461	86.1871	63.6344	-2.09547	1.13227e-11	1.28873e-10
HERVEA_Xp11.22	19.3631	50.7449	81.7091	65.7439	-2.23704	1.21518e-11	1.37951e-10
ERV316A3_7p22.3	56.9489	89.1568	6.9841	9.01256	2.06316	1.37836e-11	1.5598e-10
ERVLE_4p12e	15.5907	16.5543	48.1721	25.0748	-1.62805	1.38111e-11	1.5598e-10
HUERSP2_11q22.1c	3.32186	5.61906	36.6167	41.3465	-1.85768	1.41227e-11	1.59089e-10
HERVK11_6q25.3	115.822	136.604	13.2823	16.8484	2.42695	1.78441e-11	2.00495e-10
ERVLB4_8p23.1k	40.4553	51.5632	3.58579	8.4699	2.05656	1.79846e-11	2.01557e-10
ERVLE_22q12.3b	350.636	608.255	0	0	3.42768	1.94646e-11	2.17586e-10
MER61_7p15.3	2187.38	5329.11	6.66293	18.2621	4.29105	1.97478e-11	2.2019e-10
HERVFRD_2p11.2	493.685	380.604	136.303	75.0166	1.70046	1.99828e-11	2.22245e-10
ERV316A3_6p25.1d	167.35	144.788	32.9833	22.7431	2.06939	2.17391e-11	2.41166e-10
HERVL66_5q15	59.4044	75.9339	238.552	199.104	-2.35813	2.23235e-11	2.47024e-10
ERVLB4_Xq21.33d	1.69889	3.95535	24.2196	28.9029	-1.66683	2.25432e-11	2.48827e-10
HML2_11q12.3b	199.48	328.497	536.707	447.253	-2.10007	2.37482e-11	2.61177e-10
HERVH48_4p15.31	60.5576	101.186	0.429761	1.68838	2.27954	2.37813e-11	2.61177e-10
ERVLB4_15q13.3a	47.663	68.9866	3.88832	8.64422	2.0644	2.50287e-11	2.74189e-10
MER61_4q31.23	8.61939	11.9786	55.1031	54.9268	-1.95965	2.60296e-11	2.83656e-10
HERVS71_10q21.1	43.8916	123.916	0	0	1.98271	2.60449e-11	2.83656e-10
LTR25_2p13.3	135.663	95.177	306.813	134.195	-1.34225	2.6087e-11	2.83656e-10
HERVH_11q13.2c	5.44701	13.43	41.3816	37.5895	-2.00659	2.61929e-11	2.84102e-10
MER4_6p22.3d	37.4102	41.3754	206.775	239.723	-2.34993	2.66843e-11	2.88718e-10
ERVLB4_8q23.1e	1.44007	3.511	16.8222	13.6692	-1.49377	2.83723e-11	3.06225e-10
HERVE_11q13.4c	2445.85	2975.93	5410.36	3090.2	-1.69329	2.89734e-11	3.11945e-10
ERVLB4_3q22.1a	68.927	48.3816	21.5128	20.4815	1.77993	2.97721e-11	3.19758e-10
HERVW_15q21.2	23.613	22.4639	175.044	197.422	-2.35112	3.00585e-11	3.22045e-10
MER101_1p22.2a	61.7992	61.0027	173.883	106.599	-1.8145	3.02213e-11	3.22999e-10
ERVLB4_3q29b	95.2717	116.559	241.819	163.541	-1.65307	3.22066e-11	3.4338e-10
HERVIP10F_11q13.2	98.4978	170.148	0.668452	2.69424	2.51982	3.39435e-11	3.6102e-10
HARLEQUIN_6p21.32	0.915235	3.14925	19.796	23.3418	-1.56476	3.4144e-11	3.62274e-10
ERV316A3_5p15.2e	198.294	362.805	0.713741	4.89316	3.0083	3.44725e-11	3.64876e-10
ERV316A3_22q12.3a	248.356	429.612	0	0	3.13763	3.5203e-11	3.7171e-10
HERVL18_2q31.1	71.6065	192.058	191.421	196.242	-2.10315	3.58678e-11	3.77819e-10
ERVLE_5q31.1d	5.87946	8.80016	25.6923	18.4537	-1.56763	3.6557e-11	3.84155e-10
HERVH_9p13.3c	139.466	119.293	321.041	104.575	-1.71544	3.75996e-11	3.94166e-10
ERVLE_8q23.3f	11.0851	15.3476	0	0	1.39236	3.80418e-11	3.9785e-10
MER4B_2q31.1	5734.87	4578.59	2379.55	917.939	1.08183	3.89935e-11	4.06832e-10
HML6_14q12a	14.8359	22.5255	0	0	1.51197	3.92018e-11	4.07083e-10
HERVL66_19p12a	77.4383	88.6325	11.911	14.9195	2.13262	3.92033e-11	4.07083e-10
HERVS71_19q13.12a	12618.9	12889.6	1711.46	703.041	2.12275	4.0665e-11	4.21262e-10
HERVE_2p13.3b	46.8979	79.0647	2.3981	6.67676	2.13549	4.10166e-11	4.23902e-10
HUERSP1_2q21.2	47.9959	69.4579	1.00371	3.22278	2.16304	4.11661e-11	4.24447e-10
HERVH_4q21.3	9.7165	15.9507	45.7358	40.0308	-1.92055	4.59352e-11	4.72507e-10
ERVLB4_15q23a	51.1417	147.376	123.292	78.7869	-1.95757	4.79012e-11	4.91577e-10
HERVH_11q23.3c	3.24324	7.86948	26.8482	24.37	-1.72239	4.81052e-11	4.92516e-10
HERVH_5q21.2b	15.3313	20.8367	0	0	1.57563	5.22819e-11	5.34031e-10
ERVLB4_3p21.31a	784.156	260.002	1265.9	297.591	-0.727527	5.3662e-11	5.46853e-10
HERV9_10p13	30.505	31.5073	86.8245	45.217	-1.60713	5.50555e-11	5.59752e-10
HERVL40_6q24.1	17.7714	23.2169	0.271982	1.86461	1.65386	5.68719e-11	5.76882e-10
HERVH_9p21.3a	201.337	336.811	12.6165	24.3031	2.85704	5.74223e-11	5.81119e-10
HML1_3q21.3	1097.67	1159.84	304.089	188.69	1.59876	5.9174e-11	5.97467e-10
ERV316A3_6p21.33b	52.0755	57.4424	162.702	126.498	-1.78076	6.4151e-11	6.46229e-10
ERVLB4_1q23.3c	16.1403	22.0219	0	0	1.58732	6.4683e-11	6.4935e-10
MER4B_12p12.1a	17.4452	18.9993	1.70075	5.54614	1.61641	6.47572e-11	6.4935e-10
MER101_3q27.2	25.0966	29.1477	2.50617	9.56743	1.80954	6.74486e-11	6.74793e-10
HERVW_5p14.3	78.6973	90.514	16.4772	18.7999	1.96659	6.9005e-11	6.88793e-10
MER101_7q22.1a	117.819	92.5072	36.3107	22.5539	1.53058	6.99346e-11	6.96485e-10
HARLEQUIN_7q22.1	327.421	226.023	92.6823	52.0845	1.61007	7.05713e-11	7.01232e-10
HERVL_3p24.3c	26.2176	41.4348	0	0	1.82731	7.11833e-11	7.05714e-10
HERVH_16q21c	43.297	58.3852	1.86776	5.79328	2.11081	7.38875e-11	7.30869e-10
HERVH_3q25.2b	323.703	836.424	3.64505	10.6125	3.07331	7.42966e-11	7.33261e-10
HERVL40_22q11.23	132.269	96.4457	256.078	87.6112	-1.13241	7.50723e-11	7.39251e-10
MER4_7p11.2f	601.657	3104.39	5.09686	6.77277	2.78259	7.73337e-11	7.59812e-10
HERVH_1p33	52.6294	89.0295	134.807	90.7996	-2.13134	7.76628e-11	7.61338e-10
ERVLB4_4q23b	208.094	126.862	384.012	115.831	-1.01848	8.03642e-11	7.86062e-10
HERVW_3p11.1	13.5826	34.4586	56.5517	53.3305	-2.04343	8.26278e-11	8.06403e-10
HERVH_7q11.23a	139.873	90.9722	328.004	170.404	-1.35102	8.32874e-11	8.11034e-10
HERVL18_Xq28	144.022	424.836	0.271982	1.86461	2.42582	8.91002e-11	8.65714e-10
HERV9_8q21.11a	15.7572	24.7742	0.207259	1.03245	1.52158	9.38465e-11	9.09813e-10
HERVK11_2q14.2	3.02329	5.79559	22.9521	21.9549	-1.54823	9.4758e-11	9.16621e-10
MER61_2q35	45.0037	39.1125	139.541	118.814	-1.79857	9.71005e-11	9.37212e-10
HERVH_5q23.2f	4.84175	8.91504	35.0832	29.4535	-1.82988	1.05072e-10	1.01193e-09
HERVL74_14q12	13.8668	19.36	0.132039	0.90521	1.46297	1.08207e-10	1.03983e-09
ERVLE_5q23.3g	19.3625	25.4318	0.647259	2.57129	1.64566	1.11752e-10	1.07154e-09
HERVFRD_1q31.3	364.212	1697.13	0	0	2.78909	1.1277e-10	1.07895e-09
HERVKC4_6q22.31	41.6955	38.8536	9.36834	12.1797	1.81131	1.14597e-10	1.09404e-09
HUERSP2_17q12	5.43963	19.2042	50.0218	67.3185	-2.03336	1.15137e-10	1.09681e-09
HERVH_19p13.12	1134.8	3062.19	52.4935	103.383	3.03053	1.20475e-10	1.14517e-09
MER101_15q12	1.84932	5.53537	21.7425	23.6886	-1.58075	1.22668e-10	1.16349e-09
ERVLE_2p23.1a	25.153	48.3361	0.958509	3.13709	1.72944	1.25846e-10	1.19105e-09
HERVH_6q22.31d	129.448	262.883	0.244884	1.67884	2.56154	1.33691e-10	1.26257e-09
HUERSP1_2p22.3	40.9432	45.7871	5.13964	7.34988	1.87549	1.36195e-10	1.28345e-09
ERVLE_8q21.13d	18.0288	27.1637	0.271982	1.86461	1.59883	1.37341e-10	1.29147e-09
HERVH_14q24.3b	29.1816	33.2749	103.213	83.8303	-1.96717	1.38116e-10	1.29599e-09
ERVLE_15q25.1a	20.3858	20.3546	64.6042	44.4198	-1.62588	1.4102e-10	1.3204e-09
ERV316A3_9q34.2a	6.391	9.50378	31.5783	25.8341	-1.62505	1.49965e-10	1.40116e-09
HUERSP3_1q44	13.2938	17.6494	51.8167	38.0574	-1.69661	1.55084e-10	1.44591e-09
HERVS71_3p12.3	9.06303	12.9176	43.4984	38.7056	-1.77009	1.5764e-10	1.46662e-09
MER61_8q11.23a	19.5528	31.407	0	0	1.63888	1.6098e-10	1.49314e-09
HERVH_4q31.1a	25.6826	31.7582	145.455	154.751	-2.17427	1.61172e-10	1.49314e-09
HML5_19p12e	12.3258	28.5751	52.9834	53.4189	-1.96531	1.61729e-10	1.49514e-09
MER34B_19p13.11	53.6437	61.0415	149.693	92.4361	-1.90745	1.70925e-10	1.57683e-09
MER4B_9p13.3	39.1398	28.9071	100.655	49.3098	-1.49676	1.76604e-10	1.62579e-09
ERV316A3_6q22.31g	18.049	23.8135	0.455799	3.1248	1.63054	1.78886e-10	1.64335e-09
ERVLB4_22q11.21a	49.6472	65.7467	7.85978	12.7562	1.92377	1.80402e-10	1.65381e-09
ERVLE_17p11.2c	937.028	686.472	1830.06	787.489	-1.1196	1.81703e-10	1.66226e-09
HML5_12q12a	3650.96	996.857	2339.22	494.987	0.608827	1.82268e-10	1.66396e-09
HERVE_3p26.3	94.5746	126.447	257.141	133.676	-2.02857	1.87927e-10	1.71205e-09
ERV316A3_2q35j	27.0403	35.5241	1.98093	4.85118	1.82475	1.90474e-10	1.73165e-09
HERV9_4p14	38.6234	44.7273	97.2729	54.0891	-1.76616	1.93148e-10	1.75233e-09
ERVLE_11q23.3d	1.45471	4.07289	16.9554	18.8503	-1.43228	1.94707e-10	1.76282e-09
HML6_7p13	399.462	277.818	810.569	337.975	-1.292	1.98909e-10	1.79715e-09
MER41_4p16.1b	1928.99	1044.61	3444.08	1219.61	-0.961509	2.02853e-10	1.82901e-09
PABLB_8q24.3a	59.0823	64.6704	8.81274	11.8188	1.97102	2.12841e-10	1.91513e-09
HERVH_8q24.22a	23.3789	52.7929	145.621	157.727	-2.75876	2.14561e-10	1.92665e-09
HERVW_1p13.3	9.83218	20.2917	44.6749	53.582	-1.86587	2.18234e-10	1.95563e-09
ERV316A3_3p24.1	0.387281	2.03259	16.0586	21.3165	-1.37788	2.22645e-10	1.99108e-09
HERVL40_19q13.42	10.6247	27.1129	47.608	52.2103	-1.90747	2.23924e-10	1.99844e-09
HERVH_13q13.3a	282.311	329.747	634.293	290.053	-1.85491	2.2858e-10	2.03585e-09
ERV316A3_1q32.3a	10.4834	13.4	0.633683	2.79565	1.32107	2.39203e-10	2.12614e-09
ERV316A3_8q13.2a	2.74358	6.99883	18.2231	15.455	-1.50529	2.44441e-10	2.1683e-09
HERV9_5q31.2	1945.58	4051.83	33.4603	27.0891	3.50601	2.52393e-10	2.23431e-09
MER4_2q21.1a	83.7507	182.896	0	0	2.2834	2.56144e-10	2.26295e-09
HML6_6p22.2	41.8098	51.9342	6.27691	10.0941	1.87427	2.83894e-10	2.50307e-09
ERV316A3_2q14.1k	15.2203	25.8422	0	0	1.46454	2.96677e-10	2.61052e-09
HERVL_Xq25p	13.1136	21.4449	0	0	1.40319	3.07821e-10	2.70315e-09
PABLA_14q11.2	135.93	180.638	8.99178	10.8653	2.43725	3.24095e-10	2.84037e-09
MER4_15q21.2a	78.6182	85.3027	8.22058	11.6103	2.20942	3.31775e-10	2.90187e-09
HERVFH21_10q22.1b	19.7043	34.718	0.632241	2.74431	1.58498	3.45767e-10	3.01823e-09
ERVL_2q21.1	15.6848	24.8599	0.117489	0.805462	1.51509	3.48858e-10	3.03915e-09
HERVEA_Xq27.2	64.5648	143.987	0.644212	2.21412	2.10715	3.65466e-10	3.17752e-09
MER4_Xq28e	13.9278	20.8341	0	0	1.4654	3.6675e-10	3.18238e-09
HUERSP1_14q23.1	20.1102	56.9432	43.7509	30.1074	-1.86641	3.70439e-10	3.20803e-09
MER4B_Xq26.2b	222.632	264.483	21.6148	17.2162	2.4437	3.7929e-10	3.2782e-09
LTR25_7q36.1	13.9773	14.2303	47.4209	32.7497	-1.62223	3.81041e-10	3.28685e-09
HERVEA_5q35.3	176.971	427.823	2.18789	5.65028	2.5967	3.84184e-10	3.30746e-09
HERVW_2q11.2	156.307	77.07	65.898	38.9303	1.33352	4.11842e-10	3.53861e-09
HML6_8q12.1	55.7363	207.85	124.33	108.575	-2.43773	4.2088e-10	3.60919e-09
PABLA_11q12.1b	731.003	380.867	345.817	144.465	0.98156	4.3778e-10	3.74678e-09
ERVLE_1p22.3a	52.4362	43.5154	107.331	37.8995	-1.24318	4.39861e-10	3.75725e-09
HERVIP10F_7p13	132.802	131.6	287.437	122.818	-1.61017	4.45198e-10	3.79544e-09
LTR25_2q24.2	230.346	1153.63	2.1167	5.75939	2.33483	4.48473e-10	3.81594e-09
HERVL_5p15.32a	24.8216	37.0117	0	0	1.74039	4.50707e-10	3.82752e-09
HERVH_21q21.1d	18.8192	25.1243	0.327175	1.59857	1.59704	4.78919e-10	4.05923e-09
ERVLE_8p22a	26.1079	46.0792	64.2929	37.866	-1.902	4.91033e-10	4.15388e-09
ERVLE_5q31.3e	1.15024	5.76298	14.4653	15.6563	-1.36016	5.17333e-10	4.36792e-09
HERVL18_6q23.3	57.6072	136.981	1.45727	3.97018	2.02198	5.28081e-10	4.4501e-09
ERV316A3_11q13.3	3013.34	10405.3	73.35	59.0143	3.20003	5.44512e-10	4.57975e-09
HERVE_10p13c	14.4056	20.2277	52.196	41.9924	-1.77871	5.51695e-10	4.63128e-09
MER41_6p22.3	973.055	1412.63	202.316	296.564	1.98958	5.64702e-10	4.7314e-09
ERVL_13q21.32c	42.005	61.9655	0.0750548	0.51455	2.01084	5.66826e-10	4.74013e-09
HERVL_18q21.2a	83.2638	79.6385	170.476	63.5465	-1.25807	5.79191e-10	4.83431e-09
HERVH_20p12.1a	397.035	1305.43	2.75131	8.77329	2.87183	5.89065e-10	4.90739e-09
HARLEQUIN_2q12.3	80.2986	51.4682	25.671	19.0138	1.611	5.92362e-10	4.92549e-09
HERVH_6q22.31g	9195.73	43732	12.5787	19.2826	4.48492	6.22327e-10	5.16485e-09
HERVP71A_10q11.22	78.9748	160.188	14.7293	26.5313	1.99661	6.7705e-10	5.60838e-09
HUERSP3B_2q35	9.4033	31.6029	31.3339	29.6705	-1.74456	6.94133e-10	5.73904e-09
HERVI_7q33a	108.773	210.52	11.9725	36.7765	2.31756	7.02286e-10	5.79551e-09
ERV316A3_1p36.22a	31.1937	94.0249	188.04	250.711	-2.60633	7.37887e-10	6.07786e-09
ERVLE_8q21.3f	23.9985	30.6436	57.5669	31.2645	-1.59019	7.58707e-10	6.23762e-09
PABLB_1q31.3a	234.277	281.183	483.193	293.693	-1.64096	7.75066e-10	6.36018e-09
MER4B_Xq26.2a	741.204	1094.12	102.872	46.6639	1.96749	7.76603e-10	6.36089e-09
ERV316A3_1q32.2c	26.0572	37.2805	0.935372	3.07705	1.74375	7.82651e-10	6.39847e-09
ERV316A3_4q35.2b	236.64	1060.03	0.650411	3.64729	2.40858	7.88747e-10	6.43629e-09
HERVIP10F_3p26.1	303.496	550.311	3.64223	15.229	2.98739	8.04238e-10	6.55051e-09
HERVIP10F_3p25.3	73.2999	125.948	242.299	280.375	-2.2281	8.44514e-10	6.86579e-09
HERVH_19p13.3c	42.3906	45.6297	4.62582	8.754	1.93616	8.61102e-10	6.98769e-09
MER4_7q21.2	22.7121	29.7088	66.1653	37.0373	-1.63524	9.14602e-10	7.4081e-09
MER34B_9q22.31b	64.9245	47.167	20.1356	18.8092	1.59108	9.49833e-10	7.67928e-09
MER61_18q21.2b	26.7963	74.0611	1.94964	3.75164	1.55539	9.86657e-10	7.9623e-09
ERV316A3_1p31.3f	32.0277	32.4982	89.7925	59.6711	-1.67547	9.95361e-10	8.01778e-09
HML6_5q13.2e	543.588	470.2	1416.87	1578.34	-1.281	1.06498e-09	8.5628e-09
HERVH_4q24b	3887.2	10216.9	11.4747	56.1966	4.16755	1.07873e-09	8.65752e-09
HERVH_11p11.12	688.145	3109.16	0.516072	2.68189	2.7465	1.09418e-09	8.76546e-09
HERVL74_2q11.2	1067.81	1830.43	2116.1	1178.95	-2.57573	1.11693e-09	8.91874e-09
ERVLB4_10q26.2b	15.6902	22.7944	47.692	41.9984	-1.64263	1.11739e-09	8.91874e-09
ERVLE_21q21.1a	15.8945	24.56	0	0	1.51301	1.12268e-09	8.94472e-09
MER41_5q14.3a	17.1561	33.7032	0.132039	0.90521	1.46087	1.1292e-09	8.9803e-09
LTR19_17q21.32	99.8881	182.556	1.5821	4.64083	2.36508	1.16427e-09	9.24249e-09
HUERSP1_15q23b	127.629	241.935	241.846	133.118	-1.89829	1.21676e-09	9.64163e-09
ERVLE_18q21.1b	112.408	224.117	6.27127	11.166	2.28205	1.22256e-09	9.67015e-09
MER4_Xq28d	18.3723	29.5621	0.529459	2.69118	1.55627	1.28125e-09	1.01161e-08
HERVL_Xq25o	10.0939	14.2631	0	0	1.27547	1.31097e-09	1.03322e-08
HERVIP10FH_6q26a	437.945	892.037	2.86514	6.85663	3.06953	1.31978e-09	1.03742e-08
HERVFC2_11p15.4	126.583	392.167	3.34495	8.13506	2.28281	1.32105e-09	1.03742e-08
HERV4_13q32.3	3036.52	2040.76	1111.76	500.222	1.21082	1.40689e-09	1.10161e-08
ERVLB4_5p15.2b	49.1091	59.1509	9.04086	11.453	1.75008	1.4078e-09	1.10161e-08
HERVH_21q21.1e	34.1007	48.6135	0.304427	1.45964	1.87216	1.4304e-09	1.11729e-08
ERVLB4_6q22.31a	1.37226	4.18551	17.26	18.4805	-1.39411	1.44598e-09	1.12553e-08
HML3_7q11.21	712.836	952.094	63.4433	57.76	2.59557	1.44608e-09	1.12553e-08
HML5_20p13	591.296	326.182	294.081	101.713	0.894577	1.47544e-09	1.14635e-08
HARLEQUIN_5q31.2	463.231	1668.38	1.38076	3.8719	2.65988	1.56637e-09	1.21401e-08
ERVLE_8p11.23b	26.1556	45.7909	1.50825	3.40792	1.62272	1.56807e-09	1.21401e-08
ERV316A3_3q13.13b	6.20801	25.3362	38.8276	50.4181	-1.86581	1.5714e-09	1.21444e-08
MER61_3p11.2	19.0829	22.6882	54.7447	36.2601	-1.6501	1.64668e-09	1.27038e-08
HERVH_2p14c	51.738	76.2156	1.78105	4.49418	2.04424	1.66061e-09	1.27888e-08
HERVIP10F_3q29	36.7708	38.2185	7.39779	12.6394	1.75559	1.76343e-09	1.35567e-08
HERVH_8q22.2	16979.7	45355.3	76.5806	415.606	5.59516	1.79251e-09	1.37561e-08
HUERSP3B_11p12	23.3758	22.7819	81.2151	53.7839	-1.75778	1.89415e-09	1.45108e-08
HML3_5p15.33d	1882.67	1992.43	3429.68	1333.61	-1.24944	1.96985e-09	1.50644e-08
HERVW_5q12.1	19.0228	28.4978	2.20758	4.1535	1.42566	1.99117e-09	1.52009e-08
ERV316A3_3q27.3c	24.7555	37.0957	1.58131	6.42858	1.67562	2.01313e-09	1.53418e-08
LTR25_7q11.21	484.514	260.755	233.189	91.1645	0.954698	2.05234e-09	1.56135e-08
MER4B_11q13.2	8731	6465.78	3497.63	1867.08	1.11742	2.07125e-09	1.573e-08
ERV316A3_15q24.1b	161.021	79.1719	69.9341	44.2065	1.24918	2.07803e-09	1.57542e-08
HERVK11_11q13.2	12.1506	22.0306	0.0750548	0.51455	1.30992	2.11722e-09	1.60236e-08
HARLEQUIN_10q22.1	28.6251	39.4609	83.1132	59.2215	-1.76261	2.1856e-09	1.65126e-08
MER41_12q12	61.9669	78.4133	8.16968	13.2039	2.04831	2.19979e-09	1.65912e-08
ERV316A3_2p16.1a	272.597	154.687	121.279	74.2208	1.21498	2.23009e-09	1.67908e-08
MER101_4p16.1	13.2368	19.146	0.859378	2.62169	1.34057	2.27608e-09	1.71077e-08
ERV316A3_10q11.21c	6.4633	17.7288	24.0078	20.8952	-1.52923	2.29663e-09	1.72326e-08
HUERSP1_2q35	12.943	16.3174	1.01196	3.14274	1.34371	2.37999e-09	1.78275e-08
HUERSP1_1p13.3	15.9839	35.6258	70.5538	82.9765	-2.03445	2.40721e-09	1.80007e-08
ERV316A3_9p21.1b	176.286	429.868	0.806861	3.04161	2.56112	2.46242e-09	1.83822e-08
HERVL40_22q13.2	83.04	57.2799	28.1162	28.9329	1.61531	2.51085e-09	1.87118e-08
MER4_7q33a	76.5125	204.878	2.42241	4.47487	2.00647	2.53273e-09	1.88428e-08
MER34B_4q31.3	389.772	358.481	867.05	513.977	-1.43012	2.59714e-09	1.92893e-08
ERV316A3_Xp21.1d	58.9098	140.517	1.66856	4.63268	1.9761	2.71478e-09	2.01289e-08
HUERSP3B_3q26.31b	112.743	177.16	14.5749	16.6371	2.05688	2.77462e-09	2.05226e-08
HUERSP1_1q44a	113.864	83.7364	43.1777	35.4344	1.36387	2.77725e-09	2.05226e-08
HERVP71A_Xq24	592.256	1497.37	18.7298	18.9885	2.88312	2.82743e-09	2.08582e-08
ERV316A3_6q13b	105.685	65.5643	36.1287	19.8536	1.31163	2.87714e-09	2.11893e-08
MER4B_3q26.31	46.8074	141.693	230.2	285.564	-2.8538	2.89811e-09	2.13079e-08
MER4B_7q33a	43.6615	80.5328	1.77194	4.01801	1.82109	2.96708e-09	2.17784e-08
HERV3_14q11.2	55.8382	93.544	3.41565	6.45496	1.99948	3.07105e-09	2.25039e-08
HERVH_11q14.3	52.623	80.9255	5.92944	10.5182	1.90102	3.23728e-09	2.36824e-08
MER41_1q24.2	68.4802	70.6252	21.2621	16.6755	1.45688	3.26489e-09	2.38446e-08
HERVH_2q31.1a	12.6431	46.9112	45.8107	57.344	-1.87666	3.40578e-09	2.48322e-08
HERVH_11q24.2b	33.7266	57.0677	0.917092	3.74181	1.77026	3.7459e-09	2.72667e-08
HERVL_12q13.13	75.2092	83.1956	11.223	14.2396	1.9267	3.89862e-09	2.83312e-08
HUERSP3_2p25.2	72.8193	83.3536	177.411	156.441	-1.54478	3.93571e-09	2.85534e-08
MER4_2q36.3b	17.323	28.2689	0	0	1.47049	3.97069e-09	2.87596e-08
HERVL18_5p15.2	10.5728	16.0032	0	0	1.263	4.01287e-09	2.90172e-08
HERVH_3q11.1	111.176	109.745	216.365	80.6948	-1.56657	4.28471e-09	3.09318e-08
ERV316A3_6p21.2b	9.8847	14.6668	40.548	34.2203	-1.62928	4.41569e-09	3.18249e-08
HERVH_3q26.1i	29.3759	99.9867	92.9773	118.075	-2.25978	4.53725e-09	3.26473e-08
HERVL18_7q21.11a	37.0448	79.2428	0.914497	3.98236	1.71911	4.55782e-09	3.27416e-08
ERV316A3_11q12.3	26.3372	37.4724	3.23338	6.71807	1.59797	4.58163e-09	3.28587e-08
HERVH_7q31.1c	1529.26	6093.62	1.23976	3.81907	2.97863	4.62068e-09	3.30847e-08
HERVH_2q14.1c	13.4344	21.2996	0.115448	0.791473	1.35217	4.66802e-09	3.33691e-08
HML2_4p16.1b	114.866	150.057	246.778	135.927	-1.7211	4.78292e-09	3.41348e-08
LTR46_Xq13.3	81.4834	126.166	10.3437	11.2614	1.92079	4.914e-09	3.50133e-08
HERV3_19q13.42b	1125.17	2250.93	344.916	200.752	1.28236	5.14551e-09	3.66033e-08
ERVLE_1p36.11c	143.632	280.058	4.29847	8.98742	2.44685	5.22142e-09	3.70831e-08
HERVH_5q32b	211.879	449.741	511.394	434.244	-2.22976	5.31574e-09	3.76919e-08
HERVH_1q42.2a	11461.5	38575	15.8905	52.398	4.50568	5.3321e-09	3.77468e-08
HERVFH21_3q25.1	262.934	553.441	15.199	22.8576	2.56667	5.43309e-09	3.83997e-08
MER41_14q12	19.6126	32.7363	0.530196	2.66391	1.55383	5.44656e-09	3.84329e-08
MER4_15q26.1a	133.95	249.396	0.177832	1.21915	2.40375	5.4836e-09	3.8632e-08
ERV316A3_8q24.12c	37.483	51.2302	101.183	106.036	-1.64798	5.6793e-09	3.99466e-08
MER41_4p15.2	329.862	224.88	137.042	70.7202	1.15565	5.69905e-09	4.00212e-08
HERVW_4q21.22	121.227	102.35	36.4692	28.198	1.58059	5.81813e-09	4.07921e-08
ERVLE_1p34.2h	23.0648	41.3293	0.958625	5.13852	1.61241	5.88994e-09	4.12296e-08
HERVL_Xq22.3b	242.77	125.159	446.129	158.285	-0.977373	5.96738e-09	4.1705e-08
MER101_8p21.3	21.6339	20.1099	56.8692	34.7744	-1.43518	6.0749e-09	4.23889e-08
MER61_3q24b	11.4447	20.3636	0	0	1.29668	6.21831e-09	4.33206e-08
HERVI_16q22.2	8.77427	12.3553	85.2099	171.357	-1.94701	6.37209e-09	4.43214e-08
ERVLB4_5p15.33a	26.3145	54.4214	0	0	1.60563	6.5477e-09	4.54707e-08
HERVH_12p13.31d	13.7904	21.0596	66.8437	62.7333	-1.92656	6.56943e-09	4.55494e-08
HERVFRD_4q31.21	28.2201	52.8306	0.377576	1.94053	1.65302	6.84151e-09	4.7361e-08
HERVL_3p24.3b	31.6735	48.1803	1.38738	3.64244	1.70434	7.2022e-09	4.97793e-08
ERV316A3_2q35i	14.8439	18.6427	0.81198	2.76912	1.43981	7.34431e-09	5.06815e-08
ERVLE_22q13.33	1160.82	893.907	462.812	248.959	1.1157	7.40927e-09	5.10494e-08
ERVLB4_9q33.1a	10.834	33.0377	0.152494	1.04545	1.1941	7.4576e-09	5.13017e-08
PRIMA4_12p11.21b	440.382	260.515	218.785	103.404	0.923691	7.58121e-09	5.20703e-08
PABLA_19p12a	43.4979	39.0339	12.1254	12.4764	1.55909	7.67058e-09	5.26017e-08
MER34B_1p13.2	38.8223	49.8998	7.96361	18.3569	1.735	7.88351e-09	5.39774e-08
MER4_10q23.31a	181.969	200.497	368.811	208.246	-1.35353	8.14228e-09	5.56622e-08
HML2_9q34.11	136.727	156.396	32.0646	25.9215	1.79958	8.29362e-09	5.66085e-08
ERVLE_22q13.2a	33.7434	38.5678	6.63086	11.3712	1.61186	8.58434e-09	5.85017e-08
ERVLE_7p14.1b	2.19532	5.85587	14.5698	13.2478	-1.27755	8.62097e-09	5.86601e-08
HERVL18_5q34	534.078	608.527	62.0562	82.1871	2.49684	8.68822e-09	5.9026e-08
HERVH_9q21.33f	415.898	1799.65	2.8572	7.89966	2.68613	8.73029e-09	5.922e-08
HERVL_4q35.2	0.851807	3.73215	13.0277	15.5163	-1.22551	8.76562e-09	5.93678e-08
HARLEQUIN_10q23.1	10867.7	14083.6	167.521	234.714	4.85257	8.80044e-09	5.95116e-08
ERVLE_2q37.3e	1.33079	3.62764	17.035	28.9041	-1.28154	9.04461e-09	6.10685e-08
HERVW_6q21b	3.36743	6.75905	23.5754	27.2812	-1.47964	9.292e-09	6.26423e-08
ERVLE_5q22.3e	40.7229	37.5619	95.7148	49.4657	-1.45235	9.69291e-09	6.52448e-08
HML2_21q21.1	320.237	639.226	0.575839	3.24446	2.76109	1.00164e-08	6.73185e-08
HML3_15q11.2	176.622	318.071	9.40802	17.7093	2.57933	1.00824e-08	6.76585e-08
ERVLE_2p25.3c	27.262	50.4683	0.244884	1.67884	1.63327	1.01159e-08	6.77797e-08
ERVLB4_7q34b	24.7826	30.7055	3.57777	5.53391	1.5289	1.021e-08	6.83058e-08
HERVL_10q11.23	11.0156	14.6425	30.2521	17.7578	-1.40351	1.0534e-08	7.0366e-08
HERVL40_9q34.3	41.5979	75.0652	92.3111	68.48	-1.75158	1.12354e-08	7.49366e-08
ERVLE_8q21.13a	19.9457	29.5173	0.988247	2.88545	1.51009	1.14774e-08	7.64343e-08
MER4B_3q25.33b	9.89492	12.5979	37.2904	28.2832	-1.51201	1.15647e-08	7.68992e-08
HERVW_21q21.1	318.486	611.085	0.152494	1.04545	2.7593	1.17631e-08	7.80998e-08
HERVL_9p24.1b	186.103	659.266	4.81471	9.72367	2.29545	1.19322e-08	7.91025e-08
HERVH_10p15.1	54.9464	95.183	4.07729	7.08461	1.89817	1.21371e-08	8.03395e-08
MER4_18q21.1	143.041	273.246	0.207093	1.03146	2.36792	1.25328e-08	8.28338e-08
HERVH48_8q21.2	41.9955	39.6002	136.127	128.604	-1.65321	1.37979e-08	9.10581e-08
HERVIP10F_1p35.2a	146.94	595.226	4.73224	11.9277	2.05399	1.38728e-08	9.14145e-08
HARLEQUIN_Xq23a	99.0858	146.363	17.9013	17.3045	1.83314	1.40107e-08	9.21847e-08
ERVLB4_8q21.13b	10.682	16.4084	0.132039	0.90521	1.24602	1.49455e-08	9.81875e-08
ERV316A3_12p11.22a	81.9528	78.105	23.3373	16.6048	1.43936	1.49683e-08	9.81902e-08
HERVH_2q23.3c	39.849	84.275	0.384607	1.84517	1.75491	1.51213e-08	9.90459e-08
ERVLE_17q21.2b	16.7044	33.4861	0	0	1.40312	1.52416e-08	9.96846e-08
HERVL_1q25.2	13.5238	17.6871	42.314	29.7914	-1.6013	1.57973e-08	1.03165e-07
ERV316A3_6p24.3e	39.1667	54.3386	2.7295	6.07427	1.80179	1.61639e-08	1.05402e-07
HML3_3p22.2	631.673	324.655	333.627	128.534	0.835478	1.65049e-08	1.07466e-07
ERV316A3_7q31.1c	9362.92	4006.31	5516.57	2604.82	0.768398	1.67372e-08	1.08816e-07
MER101_2q21.1a	40.0698	79.8771	0.413277	1.99408	1.73207	1.68977e-08	1.09697e-07
HERVH_1p31.3d	16222.8	35249.1	50.9359	122.889	5.17561	1.78586e-08	1.15764e-07
HERVH_1q41h	63.4036	307.502	62.3869	66.4923	-2.06999	1.84091e-08	1.19156e-07
ERVLE_2q37.3h	5.414	12.2264	28.4581	28.4693	-1.53467	1.85481e-08	1.19878e-07
HUERSP2_12q21.1	58.9526	143.372	2.34793	5.08011	1.82399	1.86949e-08	1.20649e-07
MER41_19q13.43a	308.863	168.522	135.64	77.5879	1.14984	1.88289e-08	1.21336e-07
ERV316A3_3q13.31c	0.552427	2.15504	10.6853	13.7943	-1.09516	1.89741e-08	1.22092e-07
HERVL_6q14.1e	16.2898	22.0056	1.5738	3.53105	1.37508	1.98862e-08	1.27773e-07
HERVH_22q11.1	1301.96	2443.85	1803.42	1051.19	-2.27421	2.03594e-08	1.30622e-07
HERVL_12q21.1a	18.1432	36.5476	0.0772334	0.529485	1.39074	2.07912e-08	1.33197e-07
MER41_22q11.21	25.6564	66.9885	0.115448	0.791473	1.46436	2.12874e-08	1.36177e-07
ERVLE_7p22.1a	45.0173	35.5308	12.3277	11.2874	1.50941	2.16051e-08	1.38008e-07
HERVIP10FH_Xq24	467.624	1473.94	471.775	305.009	-2.28903	2.20207e-08	1.40458e-07
ERV316A3_6q22.1c	31.0272	63.129	0.572774	2.47288	1.63346	2.24054e-08	1.42704e-07
MER4_4q22.3	60.1744	128.052	0.292809	1.43633	1.96697	2.27948e-08	1.44973e-07
MER4_Xp22.11b	171.458	354.61	0.952684	2.64143	2.43589	2.29156e-08	1.45531e-07
HML2_1q21.3	469.314	426.53	195.18	112.953	1.17972	2.2977e-08	1.4571e-07
MER4_Xq21.31g	1454.04	4903.36	3.70889	11.9377	3.36367	2.32265e-08	1.47079e-07
HUERSP1_9q22.33	259.674	459.125	30.251	42.1714	2.14501	2.42094e-08	1.53082e-07
MER4_2q14.1a	30.944	32.6035	6.91268	8.138	1.46802	2.49414e-08	1.57483e-07
PABLA_Xq21.31b	70.8606	142.663	0.573	2.24249	2.01468	2.52915e-08	1.59464e-07
HERVIP10F_1p35.2b	275.319	976.255	11.2088	15.5292	2.33595	2.56918e-08	1.61755e-07
HERVH_1p31.1f	5.98181	11.0639	34.7208	45.5248	-1.56769	2.59297e-08	1.63019e-07
HERVL18_21q21.3	130.613	243.524	9.98821	10.1517	2.06957	2.60461e-08	1.63516e-07
ERV316A3_8q13.2b	12.7633	19.8611	0.303866	2.0832	1.2964	2.62617e-08	1.64633e-07
HERVE_2q24.1c	16.8199	23.4016	1.17386	3.54644	1.41356	2.64609e-08	1.65645e-07
ERVLB4_1q23.3d	12.4874	21.4758	0	0	1.25908	2.69065e-08	1.6797e-07
HERVP71A_1q41	262.413	356.496	23.5257	18.38	2.21358	2.6909e-08	1.6797e-07
MER41_6q14.1b	36.2935	113.114	0.933748	2.81952	1.51714	2.71525e-08	1.69249e-07
LTR25_3q26.33b	17.4881	34.1962	0	0	1.39258	2.76887e-08	1.72347e-07
HERVH_8q23.3d	21.2442	66.8254	64.2458	54.653	-1.96653	2.78627e-08	1.73183e-07
MER41_6q21a	29.1512	26.5867	7.627	10.6313	1.48881	2.86501e-08	1.77825e-07
LTR25_Yq11.221c	70.1041	114.837	1.22508	7.39292	2.06658	2.91649e-08	1.80765e-07
ERV316A3_1q21.3d	17.007	29.101	0.873379	2.7463	1.36658	2.94325e-08	1.82166e-07
MER41_22q12.3b	4.3607	12.0915	28.4264	28.8992	-1.59433	2.96823e-08	1.83453e-07
HERVW_Xp22.31	10.3489	11.5678	1.26419	4.64962	1.20978	2.99881e-08	1.85082e-07
ERVLE_Xq22.3i	8.22348	10.8571	23.0891	15.928	-1.25013	3.01164e-08	1.85612e-07
MER101_13q21.31	19.2776	35.0739	0.0750548	0.51455	1.40866	3.12351e-08	1.92236e-07
LTR25_21q22.11	13.3269	17.1453	37.0064	24.0298	-1.35244	3.19876e-08	1.96591e-07
HERVE_8p23.1k	29.0077	54.1811	0.518042	1.80579	1.56071	3.30483e-08	2.02826e-07
ERVLE_3q26.33	23.2709	37.9119	0.549454	1.9157	1.51845	3.32735e-08	2.03697e-07
ERVLE_10p15.1c	22.1494	44.9077	0.518008	2.00902	1.49048	3.32832e-08	2.03697e-07
HERVH_19q13.31	8429.9	19103	252.492	1150.27	4.14475	3.37761e-08	2.06425e-07
HERVP71A_5q14.3	49.4295	107.089	0	0	1.82598	3.403e-08	2.07688e-07
HERVS71_16p11.2	121.746	337.917	0.190503	0.934603	2.04024	3.41437e-08	2.08091e-07
HML3_3q22.1	764.001	709.426	322.687	157.459	1.0912	3.42169e-08	2.08248e-07
ERV316A3_5q14.3c	31.6747	62.8032	0	0	1.65347	3.48856e-08	2.12023e-07
ERV316A3_12q21.1	19.6852	33.0017	1.10285	5.45525	1.46072	3.56397e-08	2.16307e-07
MER41_17q22e	10.186	19.4306	30.6313	22.0943	-1.50896	3.58189e-08	2.17093e-07
ERVLB4_Xq26.2a	31.5642	76.9286	0	0	1.54905	3.60176e-08	2.17996e-07
HERVFRD_16q12.2	26.3761	80.3809	0.311023	2.13226	1.51853	3.61881e-08	2.18469e-07
MER4_7p22.1	93.513	209.131	303.151	304.587	-2.08851	3.61955e-08	2.18469e-07
HARLEQUIN_17q12	557.61	487.947	1066.27	516.487	-1.39909	3.72764e-08	2.24684e-07
ERVLB4_7q21.3b	33.9507	33.8089	76.7563	42.6043	-1.46614	3.79577e-08	2.28476e-07
HERVH_21q21.1c	39.9335	107.802	1.27945	3.30902	1.63005	3.84836e-08	2.31324e-07
HERVI_7q33b	45.8714	77.7386	2.08691	4.64774	1.79695	4.03883e-08	2.4244e-07
ERVLE_9p21.1	21.5454	50.1228	0	0	1.4184	4.04852e-08	2.4269e-07
ERVLB4_4q31.23	19.3996	36.1005	49.5919	38.0611	-1.6724	4.07041e-08	2.43669e-07
HERVH_8q22.3b	1562.71	4546.09	6.59807	20.363	3.397	4.0936e-08	2.44722e-07
MER4_8q24.3b	463.106	318.997	818.166	343.69	-0.998002	4.19722e-08	2.50575e-07
HERVL40_6q16.1c	11.7373	19.5652	0	0	1.28874	4.27127e-08	2.54649e-07
MER4_2q37.3a	27.0269	65.55	3.00608	5.56238	1.44254	4.30517e-08	2.56321e-07
HML6_11p15.4	561.209	1403.9	673.103	292.299	-2.07556	4.3127e-08	2.56421e-07
HML3_16p13.13	84.338	53.5324	319.994	359.309	-1.53167	4.32011e-08	2.56514e-07
HERVL40_9q21.32	12.411	40.3143	24.5953	17.0467	-1.44073	4.32885e-08	2.56685e-07
HML3_8q24.13	75.0463	156.011	8.50406	14.1373	1.89007	4.5731e-08	2.70522e-07
MER101_1q24.3b	2.74317	5.19028	23.2024	35.9795	-1.37569	4.57455e-08	2.70522e-07
HERVW_11q23.2	6.09155	9.8013	21.1873	17.3448	-1.29289	4.61807e-08	2.72728e-07
ERVLE_3q13.13b	14.4935	13.8136	3.27329	6.08711	1.27328	4.70908e-08	2.77728e-07
ERV316A3_6p22.1a	18.1565	34.1794	0.90027	2.75176	1.34106	4.77708e-08	2.81359e-07
HERVL74_8q21.13	10.3012	15.9316	0.355882	2.4398	1.20808	4.95985e-08	2.91733e-07
ERVLE_9q32a	3.09769	7.98069	19.4038	18.7528	-1.34982	4.98546e-08	2.92846e-07
HERVK11_19p12b	11.6296	21.1519	36.5605	30.4579	-1.58894	5.01876e-08	2.94407e-07
HARLEQUIN_19p12b	108.625	195.214	5.44131	9.50854	2.12173	5.03781e-08	2.95129e-07
MER4_13q12.12b	224.535	574.078	7.21812	16.5245	2.41835	5.07879e-08	2.96992e-07
HERVFC1_11p15.4	30.0085	71.2991	1.30939	4.80495	1.54275	5.08315e-08	2.96992e-07
HUERSP3_11q24.2	26.6751	28.4723	5.12895	7.67305	1.51029	5.13323e-08	2.99518e-07
HERVH_1q41a	31.406	73.429	0.694452	2.17896	1.57818	5.23711e-08	3.05173e-07
MER61_4q28.3a	20.0044	51.8026	0	0	1.38526	5.33689e-08	3.10574e-07
MER41_12p13.2	50.4405	49.7453	14.9476	12.8744	1.42289	5.53936e-08	3.21929e-07
HERVIP10F_13q34	20.7139	43.3307	1.30187	3.60657	1.37772	5.67305e-08	3.29262e-07
HERV4_2q31.1	27.9016	19.7699	9.02147	11.3601	1.35703	6.08002e-08	3.52416e-07
HERVL_12q23.3b	60.9997	68.9331	8.25554	8.81689	1.783	6.09882e-08	3.53039e-07
MER61_1p31.1a	5.89673	8.49419	35.3183	41.7726	-1.52772	6.157e-08	3.55936e-07
ERVLB4_2q31.1	58.9393	151.15	0.312854	1.50016	1.76968	6.16608e-08	3.55992e-07
ERV316A3_3q22.2b	12.5673	25.4577	0	0	1.23163	6.36358e-08	3.66911e-07
PABLA_5p14.1	21.5646	40.1338	0	0	1.44945	6.39505e-08	3.68241e-07
ERVL_17q12	18.5774	45.7983	0.589888	2.37543	1.36359	6.40881e-08	3.68549e-07
HUERSP1_15q26.1a	15.4671	25.0843	0	0	1.34582	6.51438e-08	3.74129e-07
HML3_4q31.3	351.696	392.988	718.758	480.231	-1.42156	6.65143e-08	3.815e-07
HERVIP10F_11q24.2	9.97218	13.3276	1.16669	3.42619	1.11912	6.82971e-08	3.91213e-07
MER41_12q13.11	108.765	97.0796	33.4995	21.4839	1.36867	6.90192e-08	3.94833e-07
ERV316A3_5q14.3a	61.1676	72.3409	130.176	74.8897	-1.6602	7.05363e-08	4.02986e-07
HERV3_11q13.3	634.37	2162.96	710.531	393.625	-1.47936	7.15997e-08	4.08528e-07
MER41_Xq26.2a	16.4443	21.9526	1.84557	4.61079	1.32826	7.2352e-08	4.12284e-07
HERVL40_14q24.3	46.5224	41.7521	12.3999	11.2437	1.44258	7.50097e-08	4.26873e-07
HERVH_4q35.1a	37441.3	72399.8	74.8481	208.086	6.18236	7.54268e-08	4.2869e-07
ERV316A3_1p22.3c	9.46536	11.6924	35.9516	27.1436	-1.39105	7.57321e-08	4.29868e-07
HERV9_14q21.3	46.3539	119.382	1.5365	5.56415	1.71858	7.67996e-08	4.35364e-07
HERVH_20p11.23b	18295.3	34721.1	178.21	301.757	4.10348	7.70586e-08	4.36267e-07
HML5_Xq11.1	19.4181	23.1741	46.4694	28.6776	-1.38287	7.81913e-08	4.42109e-07
PABLA_13q34	4.79245	8.89442	23.6486	23.1735	-1.38506	8.02221e-08	4.53007e-07
ERVL_7p12.1a	21.8496	45.0584	43.7688	40.4981	-1.52883	8.09302e-08	4.56417e-07
HML2_7q22.2	3.72707	9.74009	27.4836	37.3852	-1.48347	8.20353e-08	4.62055e-07
ERV316A3_2q22.3c	61.2772	184.429	0.72792	2.50827	1.75898	8.62096e-08	4.84943e-07
MER41_1q44b	22.8183	24.2932	59.1402	39.0089	-1.33293	8.78172e-08	4.93352e-07
HERVL40_2p24.2	14.1198	29.1194	0	0	1.27105	9.13283e-08	5.12421e-07
MER4_9p13.3d	20.4559	22.2806	42.8414	21.7083	-1.23311	9.25465e-08	5.18592e-07
HERVH_11q14.2	25.2902	54.0681	2.43335	5.51195	1.41546	9.3814e-08	5.25023e-07
HERVH_4q28.3j	26.0851	65.5802	2.14221	6.39208	1.48127	9.4359e-08	5.27399e-07
MER41_9p21.1a	15.041	31.5312	0.115448	0.791473	1.24438	9.66569e-08	5.39555e-07
HERVL_13q31.1a	9.53637	13.6613	0.634807	2.80856	1.12112	1.00816e-07	5.62053e-07
MER41_6q14.1a	33.7245	107.9	0.106525	0.730298	1.39867	1.03274e-07	5.75029e-07
MER41_11p15.5b	43.2314	82.3971	2.32709	5.80763	1.72202	1.03734e-07	5.76855e-07
MER101_2q35a	946.2	669.53	1859.15	1135.71	-1.06994	1.04506e-07	5.80412e-07
HERVH_4q32.3c	33.7226	75.8299	0.620536	2.19142	1.57254	1.04696e-07	5.80732e-07
MER61_3p21.31	12.3922	16.797	1.54589	3.69414	1.20429	1.07896e-07	5.97725e-07
HML5_12q12b	30.9739	30.269	7.76951	10.1723	1.49174	1.10187e-07	6.09648e-07
HERVP71A_1q44b	151.426	125.981	60.0809	40.4801	1.21533	1.14082e-07	6.30402e-07
HERVL40_20q11.22	602.864	735.723	161.079	91.0033	1.36146	1.17723e-07	6.497e-07
HML4_8q24.3	16638.5	9002.77	9134.5	3188.79	0.750979	1.23902e-07	6.82941e-07
HUERSP1_Xp22.2	139.832	122.499	46.0319	31.375	1.32731	1.24433e-07	6.85006e-07
ERV316A3_18q12.3a	15.1213	23.8128	0.817128	2.9227	1.30164	1.27925e-07	7.03346e-07
ERVLB4_2q32.1d	14.4123	19.8308	2.11549	4.71522	1.23918	1.28885e-07	7.07739e-07
ERVL_5q11.2	82.8324	100.366	162.849	86.2305	-1.36937	1.34311e-07	7.36607e-07
HERVIP10FH_17q21.32	76.0976	62.1772	25.5873	21.5833	1.46078	1.37111e-07	7.51027e-07
ERV316A3_6q24.2a	64.0841	128.512	4.1498	10.6931	1.84843	1.39689e-07	7.64194e-07
ERVLE_19q12b	43.2367	90.1911	3.79858	5.5883	1.56595	1.45651e-07	7.95815e-07
HERVH_6q23.1	47.5523	44.7443	115.112	84.2988	-1.53559	1.52403e-07	8.31668e-07
HERVH_3p21.31b	70.6182	48.5797	29.2238	26.0562	1.4676	1.52794e-07	8.32764e-07
MER41_6p23	72.7624	49.8856	28.525	20.3417	1.21353	1.54167e-07	8.39202e-07
HERVH_7q31.32b	38.374	52.935	101.695	107.236	-1.75393	1.5492e-07	8.4183e-07
ERV316A3_3q26.31	19.6396	36.1213	1.23329	3.18839	1.3655	1.55034e-07	8.4183e-07
ERVLB4_18q12.2d	15.2504	37.0426	0.796161	2.35295	1.21331	1.56799e-07	8.49777e-07
HERVL_18p11.32a	86.3539	136.19	7.12701	11.5396	1.96454	1.56885e-07	8.49777e-07
HERVH_2p16.2	3.59881	7.64659	20.9888	20.1574	-1.34592	1.59258e-07	8.61567e-07
HML1_11q13.4	207.369	297.147	39.8588	27.9353	1.61191	1.59828e-07	8.63581e-07
HERVH48_8q24.13	175.087	170.514	339.892	224.393	-1.08544	1.62337e-07	8.76061e-07
ERVL_Xp11.21a	11.8401	12.3709	30.8318	17.0329	-1.26445	1.67188e-07	9.01129e-07
ERVLE_1p36.12	176.734	110.875	71.4144	55.7171	1.45213	1.69788e-07	9.13983e-07
ERVLB4_8p12b	14.1087	24.6101	39.2194	34.5886	-1.42968	1.6999e-07	9.13983e-07
ERVLB4_8p21.1c	15.1745	32.3459	0.973505	2.96494	1.19922	1.70207e-07	9.1403e-07
MER101_2q33.1	84.5254	77.3882	21.704	16.8822	1.48359	1.71299e-07	9.18751e-07
MER41_16p12.3	2121.97	922.07	3271.89	1117.71	-0.677693	1.71586e-07	9.18751e-07
HUERSP2_12p12.3	17.3519	44.7348	0.375625	2.113	1.26566	1.71804e-07	9.18751e-07
ERV316A3_20p11.21	157.217	111.061	69.464	32.5968	0.978011	1.71925e-07	9.18751e-07
MER61_Xq21.31a	628.922	1396.79	3.39372	9.2694	2.76535	1.72374e-07	9.20026e-07
HERVE_10p13a	20.142	40.337	1.261	3.91665	1.3512	1.74929e-07	9.32527e-07
HERVH48_2p25.1	8.95975	12.2786	27.19	19.8085	-1.29851	1.75999e-07	9.37091e-07
ERVLE_1q42.2b	15.6181	25.1046	1.88224	3.66183	1.2057	1.76541e-07	9.37585e-07
HERVH_7p21.1b	15.975	17.238	49.9213	44.1607	-1.40408	1.76628e-07	9.37585e-07
HERVW_3q25.1a	140.123	398.234	479.585	574.065	-2.86112	1.76733e-07	9.37585e-07
HERVH_3q22.3b	19.3314	40.6304	0.825581	3.554	1.39606	1.78113e-07	9.4376e-07
MER4_7p14.3a	1358.37	835.006	2475.61	1164.9	-0.938714	1.84136e-07	9.745e-07
LTR19_Yp11.2d	35.6529	68.7472	0.0772334	0.529485	1.56547	1.8511e-07	9.78471e-07
HML5_7p14.1	6.24849	10.1137	24.6723	20.751	-1.34522	1.87503e-07	9.89927e-07
HERVL_8q21.13b	17.9354	34.49	0.74975	3.04722	1.30048	1.87744e-07	9.90005e-07
ERV316A3_16p12.1	69.7112	192.342	3.53143	7.40753	1.76309	1.92616e-07	1.01447e-06
HUERSP3_7q31.1	33.9157	33.1054	103.175	75.0832	-1.64666	1.97181e-07	1.03727e-06
ERVLE_14q12d	16.9341	26.7896	1.14512	3.02219	1.30611	2.0072e-07	1.05462e-06
LTR19_12p13.31	10.6513	21.1823	40.2284	44.8722	-1.56374	2.0229e-07	1.0616e-06
HML2_11p15.4a	83.4488	105.148	150.863	90.7654	-1.63246	2.06165e-07	1.08064e-06
ERVLE_4p16.1c	49.2345	65.5253	9.18593	13.1781	1.65113	2.08383e-07	1.09055e-06
ERV316A3_21q22.11b	660.617	348.918	1116.79	483.015	-0.832762	2.08553e-07	1.09055e-06
MER4_5q35.2c	16.4888	36.0338	0.114047	0.781864	1.29069	2.08932e-07	1.09123e-06
LTR25_19q13.43	133.151	109.223	42.0144	22.0617	1.33834	2.1096e-07	1.10051e-06
HERVL_1p22.2b	21.3437	22.367	4.17298	6.77719	1.37529	2.11297e-07	1.10095e-06
HERVW_4q23	18.2157	18.6418	4.61337	8.0778	1.3101	2.11624e-07	1.10135e-06
ERVLB4_Yq11.221b	16.0202	29.1122	0.123971	0.8499	1.27912	2.12367e-07	1.1039e-06
MER4_14q22.3b	11.9578	15.7017	1.75199	4.31947	1.18395	2.13828e-07	1.11018e-06
MER41_14q13.1	16.4294	32.9492	1.14833	3.59823	1.28537	2.18064e-07	1.13084e-06
HUERSP2_14q31.3	63.3227	268.834	143.922	248.827	-2.02653	2.19651e-07	1.13772e-06
HML6_16p11.1	31.5804	81.7455	0.183852	1.26042	1.45778	2.20763e-07	1.14213e-06
ERVL_2q24.1a	14.7885	22.7104	1.58375	4.19918	1.22978	2.28068e-07	1.17853e-06
ERVLB4_12p13.31b	101.655	81.3711	35.1283	23.6352	1.33844	2.32303e-07	1.199e-06
ERVLE_8q24.3i	59.026	72.6702	12.8369	18.4988	1.63233	2.34069e-07	1.2067e-06
HERVFH21_Xq11.2b	325.18	396.678	81.7608	176.278	2.34269	2.34514e-07	1.20757e-06
MER4_7q31.1a	18.54	36.3986	0.74833	2.50848	1.34435	2.36082e-07	1.21422e-06
HERVK11_4q31.1	19.0114	34.0236	0.523817	2.13058	1.35694	2.39421e-07	1.2296e-06
HUERSP3_6q22.31	15.3197	49.6529	65.5042	77.139	-1.82186	2.39864e-07	1.2296e-06
HERVH_20q13.12b	3.17278	9.66197	17.7315	18.0231	-1.31025	2.39915e-07	1.2296e-06
HERVL18_8p12	16.0362	48.1467	0.355882	2.4398	1.22318	2.4106e-07	1.23403e-06
ERVLB4_18q22.2	5.16436	7.67002	23.5345	19.3503	-1.33413	2.43264e-07	1.24385e-06
HERVH_4q34.3b	203.989	552.748	0.706344	4.84245	2.12292	2.65446e-07	1.35569e-06
HERVL40_9p24.1a	99.6604	84.7114	43.7121	29.0411	1.0957	2.71001e-07	1.38245e-06
HERVL40_16p11.2	29.3476	64.0634	0	0	1.44528	2.73701e-07	1.3946e-06
HERV30_3q25.2	11.173	18.1625	43.4997	42.7383	-1.58673	2.76472e-07	1.40709e-06
LTR25_19p12a	9.16361	16.4299	28.6098	22.8369	-1.42276	2.8257e-07	1.43514e-06
HML3_1p21.3	55.5113	47.383	122.082	70.731	-1.33318	2.82639e-07	1.43514e-06
MER41_3p22.1b	101.836	72.0926	184.473	75.0221	-1.00725	2.87432e-07	1.45779e-06
MER4_1p21.1	31.6144	74.2609	0	0	1.48785	2.91553e-07	1.47698e-06
HERVL40_3q22.2b	20.9539	55.3612	1.6341	3.85372	1.29479	3.0186e-07	1.52743e-06
HERVH_7q11.23b	207.164	623.036	9.43933	12.5645	2.13906	3.07146e-07	1.55238e-06
ERVLB4_14q12b	32.9955	45.018	2.59059	5.6223	1.59311	3.0918e-07	1.56086e-06
ERVLE_12q14.3a	9.96829	21.3182	30.5198	26.5344	-1.43095	3.11513e-07	1.57019e-06
HUERSP3_10q23.33c	12.7	20.9323	39.0705	33.2356	-1.40158	3.11744e-07	1.57019e-06
HERVH_5p15.33	429.138	549.128	942.826	862.894	-1.62824	3.14904e-07	1.58428e-06
HERVK11_1q23.3a	23.7089	35.4849	130.306	295.139	-1.83321	3.16244e-07	1.5892e-06
HERVH_3q26.31a	48.7005	99.1688	1.833	7.84942	1.73668	3.17861e-07	1.5955e-06
MER4_8q24.3c	84.4273	60.1456	164.337	80.0095	-1.0961	3.22307e-07	1.61596e-06
MER4_5p14.1b	13.2829	25.3677	0	0	1.2106	3.28986e-07	1.64756e-06
HERV9_Yq11.221b	21.3334	40.8272	0.44229	2.1228	1.36635	3.31399e-07	1.65775e-06
HERVL_12p13.1c	1029.55	504.349	599.825	247.532	0.735348	3.45149e-07	1.72456e-06
ERVLB4_7p21.3d	11.8934	22.3741	0.216577	1.0883	1.1506	3.53509e-07	1.76432e-06
ERVLE_11q13.5a	84.3387	110.65	281.731	342.1	-1.9663	3.67204e-07	1.83059e-06
HERVH_5q31.1b	19.3911	42.3212	1.13561	3.91626	1.34896	3.69664e-07	1.84076e-06
HERVH_7q34a	135.89	176.305	24.6475	23.5318	1.84395	3.76338e-07	1.87187e-06
HERVK11_8q11.1	56.208	150.19	0	0	1.63617	3.82692e-07	1.90131e-06
ERVLB4_14q32.11a	33.2794	149.802	0.344349	1.65183	1.33755	3.89015e-07	1.93054e-06
ERVLE_Xq22.1a	147.847	109.249	268.475	124.692	-0.994355	3.90664e-07	1.93653e-06
ERVLE_14q21.2a	9.90455	17.3692	0.461793	3.16589	1.11169	3.9278e-07	1.94482e-06
PABLB_10p15.1b	1468.03	3124.9	2.89178	6.43502	3.13242	3.9581e-07	1.9576e-06
HERVKC4_1q22	272.291	211.12	111.711	60.254	1.07592	4.17854e-07	2.0643e-06
HERVL18_4p15.2a	29.3565	62.3274	1.03789	3.42226	1.47521	4.2044e-07	2.07474e-06
PRIMA4_12p11.21a	515.382	302.889	248.571	102.283	0.910003	4.30942e-07	2.12417e-06
MER4_Xq28c	11.3483	18.1562	0.905556	2.45479	1.12163	4.43022e-07	2.18126e-06
HERVH_4p15.1a	11.7085	30.6833	0.290592	1.39919	1.12517	4.46021e-07	2.19356e-06
HERVL_7q36.1b	18111.9	12644	9084.06	4207.56	0.842551	4.49982e-07	2.21056e-06
ERV316A3_2p15a	17.467	30.0155	2.31814	4.73607	1.26793	4.61411e-07	2.26417e-06
ERVLE_4q28.1b	5.02769	13.858	19.0067	17.5215	-1.3004	4.72822e-07	2.31757e-06
HERVW_5p13.2a	142.613	140.465	37.4611	25.5002	1.44327	4.73525e-07	2.31842e-06
MER101_6q16.1	13.6028	22.4696	1.05637	2.8885	1.16614	4.77497e-07	2.33526e-06
MER4_20p11.23	65.0509	71.5329	18.1229	12.5087	1.36844	4.9836e-07	2.43457e-06
MER4_20p11.21a	84.6524	72.3822	24.018	16.6856	1.39647	4.99094e-07	2.43545e-06
ERVLE_4q31.1a	10.0259	18.4007	0.730694	2.72172	1.09065	4.99696e-07	2.43567e-06
HARLEQUIN_11q22.3	13.2092	25.7262	0.598387	2.38633	1.17144	5.04254e-07	2.45516e-06
ERVLB4_4q25b	10.2129	18.4415	0.244884	1.67884	1.11356	5.06177e-07	2.46178e-06
HERVH_2q35b	13.6	30.6403	44.6029	38.6815	-1.61583	5.08036e-07	2.46809e-06
HERVFH19_9q34.11	36.9827	47.0877	6.46746	11.3296	1.51479	5.14792e-07	2.49814e-06
ERVLE_18q21.1d	92.2368	227.801	0	0	1.8942	5.19852e-07	2.5199e-06
HERVL_5q12.1a	33.7227	53.0307	4.66473	9.33308	1.5253	5.26255e-07	2.54812e-06
MER101_2p16.1	9.90015	26.2487	24.9449	17.8192	-1.31377	5.28012e-07	2.55381e-06
HERVH_7q31.1b	1052.26	2829.57	8.38845	9.9004	2.63841	5.40587e-07	2.61175e-06
ERVLB4_2q14.2a	16.7643	26.0265	1.29699	5.21127	1.27867	5.50517e-07	2.65679e-06
MER101_19p13.2	31.4794	36.4817	8.16709	9.87418	1.31824	5.87579e-07	2.83253e-06
MER41_1q42.3	14.5559	16.9086	4.13714	8.02495	1.15055	5.91274e-07	2.84721e-06
HML3_3q13.11b	190.546	639.235	14.591	31.6022	2.10928	5.96146e-07	2.86752e-06
HUERSP1_12p12.1	51.2036	62.5798	8.04259	15.2442	1.74953	6.0023e-07	2.884e-06
HERVH_7q34b	63.4894	78.1557	13.5865	14.7159	1.56184	6.2248e-07	2.98763e-06
ERV316A3_6p25.1c	20.0964	19.9674	4.68044	6.87846	1.30012	6.64567e-07	3.18614e-06
LTR46_6p22.2	1.22535	3.32151	13.3668	13.8786	-1.14337	6.84258e-07	3.27696e-06
MER4B_Yq11.221b	76.6158	143.399	1.92836	4.61434	1.87397	6.88889e-07	3.29554e-06
HML3_13q12.11b	99.1539	78.9562	205.3	96.6316	-1.21622	6.94947e-07	3.32089e-06
HERVH_3p12.3c	17.6992	39.0026	1.23007	3.31329	1.2693	6.99517e-07	3.33909e-06
ERVLE_3p21.31a	34.3942	27.0797	66.1689	36.8187	-1.10884	7.02898e-07	3.35158e-06
ERV316A3_Xq27.2c	55.2531	158.811	1.34313	4.36513	1.58719	7.04263e-07	3.35351e-06
HERV3_7q34a	283.437	353.476	86.7344	52.983	1.24529	7.04834e-07	3.35351e-06
HML3_3q26.1a	14.4354	58.452	36.0984	48.98	-1.61446	7.06387e-07	3.35725e-06
MER61_19q13.2	29.9267	34.7324	7.95093	11.0377	1.3214	7.07421e-07	3.35852e-06
HML6_19p13.2d	368.458	438.244	638.861	316.079	-1.1038	7.17793e-07	3.40408e-06
HERVL_Xq22.3c	33.5169	49.6631	5.46581	7.43333	1.4305	7.20695e-07	3.41414e-06
HERVH_8q23.3e	17.5012	43.2009	0.490404	1.69791	1.19454	7.37803e-07	3.49142e-06
MER61_10p15.1	44.5041	64.1867	9.55504	11.4318	1.46085	7.548e-07	3.56694e-06
HML3_Xq13.3	350.509	183.057	566.541	166.573	-0.847649	7.55391e-07	3.56694e-06
HARLEQUIN_6q13	65.3724	153.735	2.96835	5.68163	1.75698	7.65919e-07	3.61277e-06
HERVL_3q26.1f	14.9527	28.4793	0.30057	2.0606	1.25059	8.0434e-07	3.78991e-06
HML5_6p22.2	67.8898	130.25	10.9419	17.1915	1.68607	8.15878e-07	3.84015e-06
ERVLB4_2q37.1a	565.771	306.198	896.725	366.912	-0.751174	8.19859e-07	3.85475e-06
ERVLE_19q13.31a	296.382	821.55	19.1291	43.3566	2.46912	8.5066e-07	3.99527e-06
HERVL40_5p12	207.646	124.793	99.9936	54.4292	1.00854	8.51997e-07	3.99727e-06
HERVH_10p12.31	23.4463	24.5127	78.352	76.3525	-1.58898	8.8485e-07	4.14697e-06
HERVH_18q21.32	2.59004	6.3885	12.3169	11.4823	-1.03601	8.8984e-07	4.1659e-06
HERVL18_11p14.1	5.30464	14.6686	21.9621	21.4718	-1.35597	8.95352e-07	4.18723e-06
HERVH_10q23.32	46.9721	76.1434	11.6954	14.7054	1.41568	8.97441e-07	4.19252e-06
HARLEQUIN_Xp22.2	213.086	531.042	32.2922	28.8783	1.67965	9.28622e-07	4.33357e-06
HERVH_8q21.3b	3721.67	10457.8	245.717	1603.38	3.62104	9.51228e-07	4.43434e-06
HERVK11_5q35.1	66.8499	62.7155	23.5656	32.5268	1.52441	9.95832e-07	4.63734e-06
HERVL_8q24.3a	4.83581	6.48628	29.6451	34.3473	-1.35051	9.99574e-07	4.64727e-06
HERVH_13q14.2a	330.282	231.646	550.468	235.173	-0.946389	1.00009e-06	4.64727e-06
MER4B_17p11.2c	54.3939	166.031	0.185816	1.27389	1.49432	1.007e-06	4.67444e-06
ERVLE_8p23.1a	7.36001	10.2399	20.6346	14.7127	-1.10601	1.02116e-06	4.73517e-06
HUERSP3B_11q14.1	10.7163	26.8077	0.211394	1.44924	1.03097	1.02285e-06	4.73797e-06
ERV316A3_6p22.1p	23.6218	21.838	51.8868	30.3784	-1.16305	1.02705e-06	4.75239e-06
HML1_14q32.32	125.269	495.453	0.19879	1.36284	1.68509	1.0339e-06	4.77904e-06
MER41_Xp11.23	12.4699	20.6384	1.51877	3.29814	1.11401	1.06348e-06	4.91063e-06
ERV316A3_5q31.3c	2.58785	5.40581	16.4596	21.3344	-1.12204	1.06943e-06	4.9329e-06
HARLEQUIN_1q32.3	127.066	378.353	477.168	596.49	-2.28314	1.07199e-06	4.93948e-06
HERV3_4p16.1	341.588	221.142	161.195	88.2622	1.00722	1.07837e-06	4.96366e-06
HERV4_6q14.1	8.63055	10.7485	1.66164	3.29185	0.975366	1.09933e-06	5.05137e-06
ERV316A3_22q13.1	66.2366	66.5057	127.193	81.647	-1.37832	1.09973e-06	5.05137e-06
ERV316A3_3q25.2b	21.9488	52.2917	0.181789	1.24628	1.32782	1.10668e-06	5.07297e-06
ERV316A3_4q31.1b	26.9042	32.4682	47.5616	22.8757	-1.1517	1.10675e-06	5.07297e-06
HERVH_9q21.33c	68.2261	90.4519	118.374	59.4747	-1.35548	1.13912e-06	5.21592e-06
HERVH_11p15.4a	7.65318	17.2239	29.3914	28.2979	-1.41237	1.14842e-06	5.25299e-06
MER4_5q35.2b	10.9408	21.8248	0	0	1.10275	1.15771e-06	5.28997e-06
HARLEQUIN_13q12.12	246.684	617.651	11.9793	31.8675	2.28126	1.16389e-06	5.31265e-06
HARLEQUIN_1p33	80.1012	192.402	7.67936	11.0039	1.63421	1.16552e-06	5.31457e-06
HERVL_10q23.33a	50.1214	128.197	1.15542	2.84293	1.56341	1.17582e-06	5.35597e-06
ERVL_11p14.3	51.7956	73.6983	110.316	83.4036	-1.46746	1.18384e-06	5.38691e-06
MER4_12q12d	0.702292	3.83999	10.4449	12.9442	-1.03124	1.19767e-06	5.44418e-06
ERVLE_8p23.1b	153.674	163.55	251.997	105.71	-1.28051	1.21206e-06	5.50387e-06
HERVH_12q24.21	199.84	882.798	0.244884	1.67884	1.92595	1.22158e-06	5.54137e-06
HERVL_12q14.2a	40.4634	29.0025	15.5387	13.1613	1.16021	1.23419e-06	5.59276e-06
HERVL18_2q23.1	822.842	2305.42	90.7702	269.092	2.66606	1.24125e-06	5.61897e-06
HERVH_5q23.2b	18.925	28.1788	49.0684	30.2424	-1.53602	1.25713e-06	5.68496e-06
MER4_4q13.2b	95.1636	252.216	1.43797	3.38085	1.80534	1.26045e-06	5.69413e-06
MER41_18p11.22	85.9583	400.9	0	0	1.52879	1.26393e-06	5.70395e-06
MER61_6q24.1b	160.898	229.25	232.958	150.494	-1.71949	1.27825e-06	5.76266e-06
MER4_1q41b	81.1221	164.136	0.438715	1.72317	1.75951	1.29056e-06	5.81217e-06
HERVH_10q24.2a	19.8959	17.0981	41.9965	25.6682	-1.0699	1.29499e-06	5.82611e-06
HERVH_12q14.1a	191.431	444.329	1.86175	5.43031	2.07697	1.30408e-06	5.86099e-06
HERVL_6q16.1b	11.1959	24.9124	0.152494	1.04545	1.10674	1.31119e-06	5.88693e-06
ERV316A3_5q23.1b	33.4003	38.4172	62.6048	35.9569	-1.2164	1.3137e-06	5.89214e-06
HERVL74_7p21.3	21.5819	41.1799	2.0519	6.8969	1.30381	1.35397e-06	6.06656e-06
HERVL_21q21.3i	42.2291	29.7949	90.9969	52.9855	-1.1245	1.38276e-06	6.18923e-06
ERV316A3_6p22.1k	60.8027	91.1697	163.722	123.529	-1.64559	1.39911e-06	6.25083e-06
HERVIP10F_5q14.2	111.446	482.95	0	0	1.50067	1.39937e-06	6.25083e-06
HARLEQUIN_19p13.2	169.878	446.257	7.02752	9.35162	1.95439	1.4151e-06	6.31461e-06
ERV316A3_7q21.3b	15.2047	16.3339	39.9237	27.4791	-1.26872	1.43056e-06	6.37711e-06
ERV316A3_3q28d	58.9131	118.782	1.75915	4.52758	1.66903	1.44469e-06	6.43356e-06
ERVLB4_7p14.1	5.07482	9.05608	15.2052	12.141	-1.06802	1.46558e-06	6.51996e-06
HERVH_1p35.2	3.07045	9.80673	14.8629	14.4757	-1.17764	1.49525e-06	6.63956e-06
PRIMA4_Xq23	19.7811	27.0916	3.98019	5.51817	1.17554	1.49549e-06	6.63956e-06
HML5_19p12f	3.20113	6.41268	14.2426	12.6411	-1.05505	1.5013e-06	6.65287e-06
ERVLE_5p13.3m	20.5349	53.8612	0	0	1.25065	1.50153e-06	6.65287e-06
HERVH_6q25.1	15.0663	72.8727	53.4591	134.12	-1.69697	1.54086e-06	6.82024e-06
MER101_3q13.11a	24.2331	48.3679	1.34997	3.43927	1.33069	1.56805e-06	6.92744e-06
HERVL18_3q25.31	53.3707	95.0372	4.34653	6.41819	1.62643	1.56824e-06	6.92744e-06
HERVL18_1p12	95.132	190.979	17.193	21.9101	1.64956	1.6067e-06	7.09021e-06
HERV9_11q21	94.1528	141.136	17.3029	16.4283	1.66068	1.61631e-06	7.12543e-06
HERVL_Xq21.2d	16.4144	42.2748	0	0	1.16486	1.6392e-06	7.21905e-06
HERV3_8q11.1	16.5292	58.4448	0.283044	1.94045	1.13714	1.64165e-06	7.22261e-06
HERVL40_Xp11.21b	266.321	237.597	126.446	56.8448	0.921452	1.64365e-06	7.22414e-06
ERVLB4_2q37.3b	579.031	394.045	948.218	442.981	-0.983043	1.6837e-06	7.39277e-06
ERVL_6q23.3b	16.083	26.4383	2.63866	9.10583	1.25835	1.69761e-06	7.44639e-06
HERVW_6q14.3a	187.99	227.886	28.2329	78.7869	2.24418	1.70639e-06	7.47738e-06
HERVL_2p24.2c	14.5827	29.2185	0.649575	2.16988	1.1704	1.7355e-06	7.59736e-06
HML5_19p12a	3.77076	9.44349	19.4806	22.0846	-1.20236	1.78878e-06	7.8228e-06
LTR46_11q21	30.3085	45.3676	4.68334	6.83951	1.3973	1.80395e-06	7.88126e-06
HERVH_5p15.2b	10.9997	24.1262	0	0	1.07384	1.84727e-06	8.06248e-06
HERVE_11q13.4e	153.211	153.869	51.2367	33.5516	1.29454	1.94596e-06	8.48477e-06
MER61_Xp11.4	7.63838	17.1625	25.4076	27.5962	-1.30824	1.9754e-06	8.60456e-06
HERVL_1q23.3a	713.288	534.35	1182.97	545.112	-0.979114	1.98678e-06	8.64556e-06
ERVLE_3q28e	59.7533	69.777	99.6324	45.0359	-1.34819	1.99779e-06	8.68483e-06
PABLA_16p13.3b	773.361	394.47	442.537	193.369	0.762183	2.0165e-06	8.75749e-06
HERVW_6q27a	417.494	919.472	1646.26	2074.66	-3.06102	2.02016e-06	8.76469e-06
MER101_21q21.3c	11.0426	13.5453	2.20045	5.39644	1.09624	2.10628e-06	9.12928e-06
HERVH_2q35a	10.8389	23.4564	0.319938	1.74519	1.04209	2.2008e-06	9.52953e-06
HERV4_17p13.1	411.089	461.975	104.066	73.2171	1.49921	2.21451e-06	9.57943e-06
ERVLE_5p14.1e	13.3686	27.3033	0.0750548	0.51455	1.12179	2.30187e-06	9.94754e-06
HML3_17p13.1	153.611	136.859	236.789	102.117	-0.922755	2.31392e-06	9.97916e-06
ERVLB4_10q22.3a	11.4024	15.3915	32.9321	27.8342	-1.23025	2.31509e-06	9.97916e-06
LTR19_6q25.3a	804.043	401.019	466.808	171.85	0.692294	2.31602e-06	9.97916e-06
HERVL_1p31.1d	60.7082	92.7053	101.498	55.0285	-1.30356	2.32125e-06	9.99186e-06
ERV316A3_3q13.12c	202.174	202.671	324.873	122.657	-1.01344	2.38191e-06	1.02429e-05
HERV4_19q13.43b	502.315	305.005	260.776	112.415	0.825379	2.40088e-06	1.03144e-05
LTR25_Yq11.221b	25.0709	61.6854	0.356871	2.44658	1.32129	2.42572e-06	1.04109e-05
HERVEA_21q22.11	41.8726	41.8706	91.7423	54.0807	-1.27129	2.43032e-06	1.04204e-05
HML6_1p13.3	10.3165	18.8989	37.5236	60.8765	-1.39436	2.45091e-06	1.04984e-05
MER4B_5p14.1b	82.745	143.314	3.4914	7.4363	1.79936	2.51973e-06	1.07827e-05
HERVL_1q42.13	116.98	102.744	48.6803	32.3672	1.14484	2.52754e-06	1.08055e-05
HUERSP3_1q42.12	825.147	483.944	456.887	200.894	0.734932	2.54937e-06	1.08882e-05
HERVW_11q14.2	18.4847	26.1725	41.8514	28.6395	-1.25975	2.55646e-06	1.09079e-05
MER4_12q13.3b	81.33	209.757	0.22081	1.5138	1.70714	2.59101e-06	1.10445e-05
HERVL32_2p15a	14.3938	20.8046	2.20477	5.18401	1.1684	2.6181e-06	1.11492e-05
MER41_2q11.2	13.3658	27.9571	87.9482	122.126	-1.85254	2.6368e-06	1.12179e-05
HERVP71A_8q24.13	18.6088	25.8339	3.1733	8.34369	1.22514	2.641e-06	1.1224e-05
PRIMA4_Xp11.22	17.0739	44.4167	28.3201	22.6836	-1.28636	2.64335e-06	1.1224e-05
LTR25_5q15b	9.53128	17.0559	25.5022	23.2992	-1.16337	2.65013e-06	1.12419e-05
HERVIP10FH_6q15a	18.898	16.1161	45.6559	29.4613	-1.12708	2.70034e-06	1.14438e-05
HERVIP10FH_5q23.1a	6.89112	22.6846	20.0104	18.1466	-1.2592	2.7062e-06	1.14575e-05
MER4B_21q22.3	9.31609	16.1301	30.4024	27.2852	-1.29904	2.70916e-06	1.1459e-05
HERVEA_19q13.33	181.153	212.07	647.2	713.459	-1.44563	2.85191e-06	1.20512e-05
HERVH_12q13.2b	182.648	320.432	238.98	128.616	-1.42152	2.87639e-06	1.21429e-05
ERVLB4_19p13.11	291.724	154.669	444.006	147.345	-0.679632	2.88779e-06	1.21793e-05
HERVK11_1p13.3	267.15	432.309	327.896	220.601	-1.45335	2.93738e-06	1.23765e-05
MER4_1q21.3	18.4789	66.2177	0	0	1.13294	3.04781e-06	1.28295e-05
HERVH_2q33.3a	10.2289	16.913	34.3838	36.6608	-1.36031	3.0689e-06	1.29059e-05
ERV316A3_1p21.1c	12.1018	24.0246	0.467688	1.93326	1.08175	3.11776e-06	1.30988e-05
LTR25_7q21.12	176.858	126.978	72.6403	55.469	1.25956	3.13535e-06	1.31601e-05
HERVL_4p13a	2.94567	7.37415	16.748	20.5991	-1.13654	3.21009e-06	1.34609e-05
ERV316A3_4p15.32b	1682.06	617.867	2353.94	621.653	-0.522065	3.2265e-06	1.35168e-05
HERVH_1q32.2b	9.78102	16.9831	0.399106	1.91412	1.04618	3.23597e-06	1.35435e-05
ERVLE_8p23.1e	19.5574	20.5847	41.2271	23.4452	-1.16469	3.28966e-06	1.3755e-05
HERVH_15q26.1a	9.19039	14.6986	1.34764	3.85565	0.976073	3.31834e-06	1.38618e-05
ERVLB4_13q34b	2.09365	8.36358	9.78273	9.84182	-0.982299	3.34185e-06	1.39467e-05
HUERSP1_2q11.2	119.047	70.1128	51.6995	32.6744	1.0182	3.34892e-06	1.39628e-05
ERV316A3_3q25.2c	41.0492	76.3881	1.57753	3.74642	1.52638	3.36261e-06	1.40066e-05
HERVH_7p21.3c	36.8533	102.242	49.7978	30.008	-1.53109	3.36673e-06	1.40105e-05
ERVLE_3q28b	99.1826	256.591	0.353172	2.42123	1.73277	3.37847e-06	1.4046e-05
HERVE_14q22.1	38.9621	109.146	0.215168	1.47512	1.46078	3.39341e-06	1.40947e-05
HERVH_4q34.1b	22.9212	45.9605	54.2597	50.3835	-1.61642	3.39925e-06	1.41056e-05
MER61_1q31.1a	35.8828	95.8945	0	0	1.37386	3.47294e-06	1.43978e-05
MER61_2q31.1b	34.9857	37.5386	10.8838	17.437	1.3662	3.55072e-06	1.47063e-05
HERVW_1p12b	2164.78	1017.35	1334.81	452.346	0.626041	3.65479e-06	1.5123e-05
HERVL_21q21.3f	34.0693	51.885	4.85794	7.02803	1.36784	3.69018e-06	1.5255e-05
HERVL74_19p13.2b	50.3267	59.0667	86.6775	56.1587	-1.40677	3.71537e-06	1.53447e-05
HERVH_Xp22.32a	20783	92338.8	68.8043	206.568	4.37387	3.77268e-06	1.55667e-05
MER101_18q21.1a	199.01	129.616	330.932	140.029	-0.883272	3.90696e-06	1.61009e-05
ERVLE_21q21.1e	11.6108	29.6563	0.684984	3.49632	1.04544	3.91315e-06	1.61009e-05
ERV316A3_1q32.2d	12.7768	22.7194	1.04854	3.35253	1.09521	3.91317e-06	1.61009e-05
MER4_12q21.1b	15.0041	45.7884	0.309399	1.50001	1.06806	4.04274e-06	1.66185e-05
ERV316A3_6p22.1n	954.601	1063.97	2308.73	2100.61	-1.45583	4.09477e-06	1.68166e-05
ERV316A3_7q33a	10.8991	26.5263	0.17736	1.21592	1.02754	4.16025e-06	1.70695e-05
MER41_13q34b	64.8681	313.832	3.70982	6.69614	1.35174	4.20402e-06	1.7233e-05
ERV316A3_16q23.1a	19.6979	24.2429	6.03321	7.46609	1.12837	4.24283e-06	1.73758e-05
HUERSP3_2p13.3	110.485	82.949	175.941	71.8451	-0.95903	4.25029e-06	1.73901e-05
ERVLE_3p21.31f	228.567	252.829	330.522	133.895	-0.919346	4.30101e-06	1.75812e-05
HERVL_6q16.1a	14.3394	31.6381	0.558882	1.92698	1.11101	4.38499e-06	1.79077e-05
HERVEA_4q22.1	489.577	2092.38	21.1108	26.4531	2.08373	4.38976e-06	1.79105e-05
HERVL40_2q32.2	91.9205	86.1631	33.5869	16.953	1.05966	4.45253e-06	1.81498e-05
MER4_15q22.31b	62.7835	56.7925	120.835	73.1047	-1.0365	4.46367e-06	1.81782e-05
MER4B_7q21.11b	5.23983	9.21037	15.2253	12.0107	-1.07042	4.54971e-06	1.85114e-05
MER41_10q11.23	62.8761	224.71	0.500094	1.9896	1.40609	4.55705e-06	1.85241e-05
ERV316A3_9q32b	4.64439	11.4511	14.9824	15.5282	-1.05868	4.56584e-06	1.85426e-05
MER4_2p24.3c	18.4764	37.665	0.341947	1.71073	1.18407	4.63529e-06	1.88031e-05
HERVH_13q13.3b	129.139	181.096	238.173	158.405	-1.6327	4.63856e-06	1.88031e-05
ERV316A3_6p25.3a	18.059	18.7288	6.02324	8.2826	1.11108	4.68736e-06	1.89834e-05
HERVIP10FH_22q12.2	19.3114	27.2006	3.00052	4.91033	1.21069	4.71302e-06	1.90697e-05
HML1_6q27a	436.201	901.38	1537.51	1881.56	-2.7964	4.85342e-06	1.96196e-05
HUERSP3B_1q24.2	139.628	126.944	63.8263	30.4982	0.950503	4.888e-06	1.97412e-05
HERVP71A_2q32.2	563.221	490.721	240.153	106.549	0.952698	5.02492e-06	2.02755e-05
HML3_5p15.33c	2726	2609.33	3914.3	1446.79	-0.820947	5.06214e-06	2.04069e-05
LTR25_15q21.1a	21.5432	31.9581	4.54155	5.80826	1.14405	5.07789e-06	2.04516e-05
ERVLE_3q29b	2081.41	989.465	1293.85	302.408	0.568966	5.09761e-06	2.05122e-05
PABLA_19p13.2	20.2881	20.941	7.40931	10.1568	1.08263	5.24024e-06	2.10667e-05
ERV316A3_2q35f	91.1929	66.9008	161.813	83.0006	-0.999157	5.25418e-06	2.11034e-05
HERV3_19q13.42c	608.72	1119.1	225.834	105.982	0.961029	5.27959e-06	2.1168e-05
HERVK11D_6q22.31	18.917	19.7249	5.83102	8.11325	1.14872	5.27992e-06	2.1168e-05
HERVH_3q26.1j	6.22692	25.7157	28.3197	49.5375	-1.34665	5.34145e-06	2.13872e-05
HML1_22q12.2	60.5615	64.6382	23.5819	23.4322	1.17067	5.34435e-06	2.13872e-05
HERVH_3q13.2	66.6996	171.513	106.534	139.01	-1.80717	5.37666e-06	2.14968e-05
HERVFRD_Xp21.1	20.7119	41.4023	0.853067	3.51779	1.27671	5.41478e-06	2.16295e-05
HML6_20p11.21	9.21027	11.9677	1.62476	3.81478	0.97786	5.43754e-06	2.17006e-05
HERVH_6q16.1b	50.2328	151.159	0.614418	2.27722	1.45674	5.50385e-06	2.19453e-05
ERVLE_1p31.1s	165.424	367.346	0	0	1.93904	5.58596e-06	2.22524e-05
MER4B_19q13.42a	155.204	170.39	241.451	129.539	-1.17766	5.69892e-06	2.26818e-05
MER41_3p22.1c	23.2582	49.2568	48.0676	44.0842	-1.4386	5.72118e-06	2.27497e-05
ERVLB4_Xp11.22e	0.932175	2.85346	12.4983	19.588	-1.00961	5.72689e-06	2.27518e-05
HERVH_8q13.2	21.9799	49.9118	0.402599	1.93979	1.27346	5.81759e-06	2.30912e-05
MER4_8q12.1b	1.1959	3.68128	10.9774	12.9371	-0.987253	5.92958e-06	2.35144e-05
HERVH_3q13.11	173.332	415.297	1.36636	3.5572	1.865	5.99078e-06	2.37356e-05
HERVH_3p12.3b	4.32666	23.9849	16.5283	24.5801	-1.12136	6.01495e-06	2.37845e-05
ERVLE_12p13.32	17.6091	19.8593	4.06596	8.08478	1.16532	6.01629e-06	2.37845e-05
HERVL40_1p31.1c	11.733	16.7464	1.36348	3.75128	1.07481	6.01941e-06	2.37845e-05
MER61_8q24.22	70.6218	208.334	152.382	205.038	-1.65637	6.08467e-06	2.40207e-05
HML1_19q13.41b	63.5245	60.9673	20.291	21.1174	1.45044	6.10107e-06	2.40638e-05
ERVLB4_20p12.3c	19.0524	18.5564	6.51082	9.4547	1.11359	6.14078e-06	2.41986e-05
HUERSP1_2q31.1a	19.109	26.607	3.31056	5.54188	1.18495	6.15767e-06	2.42434e-05
HERVL_6q22.33b	20.7469	24.9029	38.4055	19.7027	-1.08525	6.30645e-06	2.48069e-05
ERVLE_7q34b	12.5845	14.0712	3.35189	5.34342	0.997837	6.42098e-06	2.52347e-05
HERVH_15q21.3b	336.959	1179.51	4.696	18.3662	1.97897	6.48118e-06	2.54485e-05
ERV316A3_1p36.22b	5.43212	22.4576	26.4317	37.0242	-1.30148	6.57649e-06	2.57996e-05
MER61_12q23.3	15.3872	27.7183	0.995137	3.23477	1.16798	6.67424e-06	2.61597e-05
HERV9_10q21.1b	28.3394	87.0215	0.115448	0.791473	1.21971	6.77478e-06	2.653e-05
HERVL40_3p24.3	4.86866	9.82495	20.422	20.7436	-1.15664	6.81679e-06	2.66707e-05
MER4_22q12.3	30620.4	18502.9	44263.1	17316.3	-0.737459	6.89165e-06	2.69395e-05
HERVW_12q13.3	25.4229	30.6388	6.54778	8.79457	1.23739	6.91932e-06	2.70236e-05
HERVH_12p12.3a	62.81	162.004	4.5382	6.54735	1.46849	6.96185e-06	2.71655e-05
ERVLE_4q21.3	124.293	71.4464	193.935	68.6037	-0.791279	6.98973e-06	2.725e-05
HERVH_2p24.1	17.4388	40.8867	0.840598	2.58546	1.14353	7.15704e-06	2.78775e-05
HERVIP10FH_5q14.2	351.51	1399.72	1.64756	5.51505	1.81525	7.36144e-06	2.86482e-05
MER34B_11p15.5	66.8161	160.904	3.70545	4.68608	1.52082	7.41936e-06	2.88479e-05
HERVH_4q34.3c	15.7618	38.4535	0	0	1.10578	7.43277e-06	2.88745e-05
HERVE_Xp11.23	619.244	549.589	1009.23	494.179	-0.895607	7.47716e-06	2.90212e-05
MER4_19q13.41b	128.427	85.7775	202.226	85.6889	-0.784237	7.4912e-06	2.905e-05
MER61_6q15	42.6555	60.007	12.2179	11.8917	1.23275	7.50743e-06	2.90871e-05
HERVIP10F_19q13.31	9.67597	20.5497	0.635801	2.21804	0.959454	7.51973e-06	2.91091e-05
HARLEQUIN_1p13.2b	124.072	137.521	231.811	139.834	-1.05759	7.54095e-06	2.91655e-05
HERVH_8q22.1a	1179.89	6098.61	558.718	240.948	-1.46379	7.58798e-06	2.93215e-05
HML5_19p12d	317.926	2016.92	0.89691	5.02521	1.48325	7.59871e-06	2.93371e-05
HML5_4q24	61.3413	52.0205	105.18	52.5019	-0.976519	7.63389e-06	2.94469e-05
ERVLE_1q32.1e	32.2515	54.0127	6.90637	11.5267	1.31836	7.66827e-06	2.95535e-05
HERVH_1p31.1l	18.6439	39.0742	0.513292	3.51896	1.21155	7.71704e-06	2.97154e-05
HML3_14q32.32	338.973	1148.41	3.95898	8.13963	1.90791	7.85709e-06	3.02281e-05
HERVH_6q12c	446.344	2467	0.810064	2.43067	1.80738	7.96668e-06	3.06228e-05
HERVFRD_8q13.2	36.9026	53.9661	4.95988	10.012	1.4542	7.99237e-06	3.06946e-05
ERVLE_2p14b	105.793	142.187	43.1018	79.6963	1.53396	8.07357e-06	3.09793e-05
ERVLB4_12q21.1a	13.4032	29.8881	0.735207	2.50081	1.05862	8.09707e-06	3.10423e-05
ERVLE_5q35.1b	27.235	69.4407	0.194967	1.33663	1.2369	8.33588e-06	3.19299e-05
HERVH_7q33b	0.914537	3.28206	10.916	14.4044	-0.964627	8.40339e-06	3.21604e-05
MER4_17q11.2b	46.5553	74.0661	9.89415	11.3147	1.37636	8.44041e-06	3.22739e-05
ERVLE_14q31.3h	4.1244	9.80871	16.9886	18.1639	-1.08134	8.47513e-06	3.23784e-05
HERVW_4p14	11.2008	23.7245	0.422715	2.05325	1.03912	8.57066e-06	3.27148e-05
ERV316A3_8q13.3b	15.6277	23.1509	2.91796	7.47257	1.16295	8.8191e-06	3.36339e-05
HERVL74_10q23.33	12.5609	22.0882	0.931502	3.49449	1.07383	8.95331e-06	3.4116e-05
ERVLE_7q21.2	56.4363	46.0811	92.2404	37.9352	-0.862009	9.00892e-06	3.42981e-05
HERVI_18q21.1	1626.07	5033.17	85.6698	201.188	2.22293	9.20118e-06	3.49996e-05
HERVH_13q21.32b	6.44873	25.732	18.7886	19.5826	-1.22396	9.29509e-06	3.53262e-05
HERVH_3q26.1d	10.5185	22.1128	0.356871	2.44658	1.05155	9.53175e-06	3.61942e-05
ERVLE_5q32	8.71111	13.5922	1.4689	4.06322	0.93734	9.59221e-06	3.63923e-05
PRIMA4_1q21.1e	14.4735	31.1217	1.38113	5.1606	1.07605	9.67996e-06	3.66764e-05
ERV316A3_6q14.2	9.46063	14.1611	1.14058	3.53613	0.985102	9.68384e-06	3.66764e-05
HERVL40_1q41	147.204	231.073	40.0327	28.5788	1.23873	9.85121e-06	3.7278e-05
HARLEQUIN_5q14.2	3652.42	3022.66	6201.41	3616.68	-0.986976	9.9244e-06	3.75226e-05
PRIMA41_19p12d	500.857	321.43	815.822	368.743	-0.810276	1.01058e-05	3.81754e-05
ERVLB4_3q25.31b	11.5579	27.7515	27.4924	23.3931	-1.2442	1.03452e-05	3.90464e-05
HERVH_19p13.2d	1601.38	989.91	2308.34	783.1	-0.668142	1.05732e-05	3.98724e-05
MER34B_9q22.31a	78.2535	66.0082	36.7195	36.1824	1.19769	1.06691e-05	4.01995e-05
HML3_8q11.23c	67.4977	50.5601	25.8177	16.2823	1.08763	1.0852e-05	4.08536e-05
HERVFRD_19q13.41	155.109	567.758	7.00994	15.7433	1.77654	1.09205e-05	4.1076e-05
HUERSP2_1q25.3	17.4545	37.6376	0.464911	1.5848	1.11648	1.13229e-05	4.25532e-05
PRIMA41_7q21.12	16.8846	19.0749	4.74165	9.73802	1.12437	1.13403e-05	4.25821e-05
HML5_19p12b	35.3173	80.5718	2.84888	5.2802	1.28746	1.13601e-05	4.26198e-05
ERV316A3_9q33.2	40.6508	49.7061	11.9947	16.4117	1.3989	1.14822e-05	4.30411e-05
MER41_14q32.2	36.6544	68.1396	54.3931	34.5692	-1.27335	1.15007e-05	4.30734e-05
MER4_3p21.2	13.0961	16.2069	3.11805	5.36464	1.03903	1.16946e-05	4.37623e-05
PRIMAX_19q13.43	164.315	84.8751	95.0143	33.889	0.666346	1.18347e-05	4.42489e-05
HERVL40_7q21.11	14.3289	34.932	0.541698	2.72769	1.05811	1.18484e-05	4.42623e-05
MER34B_12p12.1	9.63376	13.9666	1.24865	3.82204	0.996868	1.18811e-05	4.43309e-05
ERV316A3_9p13.3a	53.5222	53.4248	15.9626	14.5044	1.22797	1.1887e-05	4.43309e-05
ERVLB4_1p34.1	18.6108	27.9676	38.6592	33.3285	-1.17976	1.20044e-05	4.46991e-05
MER4_4q26a	11.3268	18.1887	1.31662	3.5904	1.01565	1.20061e-05	4.46991e-05
HERVH_4q13.3	84.9199	61.5554	35.5665	26.1079	1.08932	1.20625e-05	4.48708e-05
MER61_2q32.3a	19.8769	42.311	0.264408	1.81269	1.20613	1.22173e-05	4.5408e-05
HERVH_1q42.13b	19.5677	20.1596	5.20454	6.92424	1.09976	1.23081e-05	4.57067e-05
ERVLB4_11p15.5e	519.025	1966.75	268.669	246.323	-1.58862	1.24057e-05	4.60302e-05
ERVLE_1p34.2a	51.5294	32.807	26.0992	17.4382	0.938985	1.24992e-05	4.63381e-05
PRIMA4_14q22.1	46.5906	54.8909	85.9241	56.8836	-1.19315	1.2579e-05	4.65944e-05
HML1_Xq26.3	59.0578	160.39	0.673901	2.35744	1.43369	1.27097e-05	4.70388e-05
ERV316A3_2q32.1i	2.34601	7.05989	12.3672	12.3917	-1.02909	1.27748e-05	4.72397e-05
LTR23_7p11.2	84.3167	474.279	1.24266	4.04138	1.26081	1.29878e-05	4.79868e-05
HML2_1p31.1	19.545	30.6607	4.51357	11.3926	1.18853	1.30084e-05	4.80226e-05
HERVH_11p15.4g	16.6955	24.5624	2.72563	5.57695	1.13985	1.32143e-05	4.87416e-05
MER34B_7q11.23a	273.614	1467.29	21.7585	25.5689	1.53179	1.33217e-05	4.90964e-05
ERVLB4_10q23.33c	11.3599	21.4361	0.74671	2.80324	1.00599	1.34492e-05	4.95248e-05
ERVLE_9q22.31	174.363	101.428	97.6812	56.2589	0.942666	1.37455e-05	5.05735e-05
HERVH_13q31.3a	164.341	558.145	1.06658	3.81642	1.63531	1.3774e-05	5.06354e-05
HERVH_13q33.3	48555.2	97815.8	1265.73	858.919	2.63643	1.37883e-05	5.06458e-05
ERVLB4_22q13.2	44.7481	43.7654	13.1302	16.275	1.35504	1.38662e-05	5.08892e-05
ERVLE_4q32.1j	10.3608	26.0112	0	0	0.968891	1.39436e-05	5.11304e-05
HML2_10q24.2	58.3782	86.596	13.1874	17.7636	1.35108	1.39952e-05	5.12768e-05
ERV316A3_11p15.3	10.2466	12.0193	2.95954	7.00246	0.964082	1.40596e-05	5.14698e-05
PABLA_6q26a	96.4081	377.467	0.763312	2.57145	1.50354	1.41362e-05	5.17069e-05
ERV316A3_2q33.1h	1.47603	3.75539	12.8624	18.0042	-0.993885	1.41803e-05	5.18249e-05
HERVFRD_8q21.13b	12.5292	29.0173	0	0	1.00112	1.43603e-05	5.24391e-05
HERVH_6q22.31c	53.8097	168.337	2.59658	7.91033	1.41254	1.46624e-05	5.34839e-05
PABLA_6q27a	33.7402	45.0389	61.8363	42.1824	-1.17031	1.46708e-05	5.34839e-05
HARLEQUIN_7q32.1a	8.91161	12.6723	1.84381	4.67142	0.921139	1.48023e-05	5.39181e-05
HML4_4q13.3	30.7571	76.3537	0.918485	3.01287	1.26644	1.48511e-05	5.40511e-05
HML2_19p13.3	33.8179	75.8529	2.93117	12.8852	1.34873	1.49116e-05	5.42261e-05
HERVIP10FH_4q28.3	33.8322	83.084	0.695858	3.1468	1.28765	1.4981e-05	5.44335e-05
ERVLE_10p15.1d	10.6344	16.0883	3.13583	6.07619	0.95537	1.50969e-05	5.48093e-05
HERVIP10FH_6q25.3	6.54854	11.2178	22.6547	26.2337	-1.12744	1.51941e-05	5.51163e-05
HERVH_5q31.1d	113997	662471	44.858	122.225	4.29771	1.54592e-05	5.60318e-05
ERVLE_7q32.3a	7.38878	10.2447	22.3149	23.3759	-1.01335	1.55801e-05	5.64232e-05
HERV3_19p13.3	730.283	1038.84	192.565	123.122	1.35432	1.59198e-05	5.76059e-05
ERV316A3_5q35.3a	98.0565	119.641	27.6692	29.7356	1.48281	1.5956e-05	5.76891e-05
HUERSP3B_11q24.2	9.39311	17.7439	1.01962	3.24558	0.950543	1.61684e-05	5.84089e-05
HERVL40_1q44	243.671	163.122	109.898	50.1747	0.916993	1.64338e-05	5.93186e-05
LTR25_9q22.2	9.61908	13.4973	1.87805	4.07941	0.923214	1.65013e-05	5.95133e-05
MER4_4q25a	2.00186	6.08786	17.9415	28.5169	-1.08401	1.6727e-05	6.02777e-05
HERVL18_18q21.32	1.393	3.46323	18.1116	29.3773	-1.10372	1.70135e-05	6.12597e-05
HERVH_4p16.1d	38.5209	49.541	64.0572	37.2111	-1.24528	1.7125e-05	6.15983e-05
ERVLE_9p13.3a	10.0324	27.2932	0.649725	2.53053	0.911366	1.71356e-05	6.15983e-05
HERVL18_4q24a	29.256	100.796	0	0	1.14681	1.72764e-05	6.20533e-05
HERVH_3q25.2d	13.0768	22.2169	2.04676	4.43907	1.0143	1.73066e-05	6.21109e-05
MER4_2q37.3b	11.6921	20.8581	1.49546	3.73485	0.983052	1.73565e-05	6.22391e-05
PRIMA41_1p36.13a	6.43398	22.7136	23.8969	29.0267	-1.25982	1.74523e-05	6.25316e-05
ERVLE_17q22a	30.185	77.3371	0.59447	2.07938	1.21221	1.75163e-05	6.27093e-05
MER61_7q31.33	12.4072	36.6445	0.0772334	0.529485	0.993486	1.77873e-05	6.36276e-05
HERVH_18q22.3a	1038.04	3098.93	16.571	72.8554	2.42016	1.81691e-05	6.49403e-05
ERV316A3_6p22.1m	27.9358	34.8329	64.1268	45.9965	-1.36004	1.8199e-05	6.49942e-05
HERVL_5q14.3b	60.9034	161.736	2.15359	5.12331	1.44555	1.8246e-05	6.51092e-05
HERVH_6q14.1e	2.03651	6.07703	13.7341	18.5586	-1.00021	1.85312e-05	6.60729e-05
LTR57_14q32.33a	39.9839	71.8727	4.41943	7.38755	1.34953	1.85617e-05	6.61278e-05
MER34B_3q13.32a	31.9106	79.0192	1.68093	3.59035	1.23607	1.85897e-05	6.6174e-05
HERVL40_18q11.2c	26.8733	66.1109	102.27	122.438	-1.82221	1.88546e-05	6.70623e-05
ERVLE_1p36.22	41.7632	33.2429	16.1446	15.5169	1.13404	1.88935e-05	6.71464e-05
PRIMA41_7p14.1b	6.90143	12.5534	20.8723	20.217	-1.07788	1.91677e-05	6.80654e-05
PABLB_Xp21.1a	12.6042	24.6724	0.784346	3.3478	1.05154	1.91987e-05	6.81206e-05
HERVL_3p13b	62.2303	101.215	16.0196	26.5007	1.45467	1.94165e-05	6.88374e-05
HERVH_21q21.1b	24.1069	51.5018	45.6497	38.7463	-1.35809	1.94901e-05	6.90426e-05
ERV316A3_21q22.11a	2.42218	7.18321	13.3406	16.0427	-1.02108	1.95672e-05	6.92595e-05
HERV9_16q21	12.1685	31.3266	0.778918	2.91432	0.98708	1.95908e-05	6.92872e-05
HERVFRD_21q22.3	47.6196	49.3588	75.2652	39.3944	-1.05022	1.96921e-05	6.95893e-05
PABLA_6p12.2	73.5137	273.597	0.439346	2.28887	1.35057	2.0006e-05	7.06415e-05
HML6_19q13.41f	340.961	448.832	454.872	237.92	-1.15937	2.01524e-05	7.11012e-05
ERV316A3_Xp22.11	106.843	94.4233	45.8971	35.0753	1.01298	2.03602e-05	7.17768e-05
ERV316A3_14q13.1b	11.3291	19.8195	1.41164	3.09211	0.955214	2.05985e-05	7.25582e-05
ERV316A3_4q22.3d	24.2625	46.374	3.33303	5.17885	1.15076	2.06343e-05	7.26262e-05
HERVL_9p23b	15.7291	20.541	3.39696	7.27062	1.10369	2.07416e-05	7.29452e-05
ERVLE_6p21.32	84.4995	182.822	231.893	348.313	-1.98041	2.08703e-05	7.33389e-05
ERV316A3_1q25.3b	152.082	281.999	38.5525	25.1376	1.19828	2.09474e-05	7.3551e-05
HERV9_17q11.2b	26.1028	48.6875	2.4113	6.38216	1.25916	2.10882e-05	7.39861e-05
HERVL_8q21.11	11.8444	15.9215	2.69146	5.57275	0.987897	2.11057e-05	7.39881e-05
ERV316A3_8q24.22d	1.33223	3.26012	11.3635	13.8055	-0.929875	2.16884e-05	7.597e-05
ERV316A3_12q21.33e	13.1887	33.6771	0.185816	1.27389	1.02176	2.18499e-05	7.64747e-05
MER101_10q11.22d	24.3606	28.3312	55.9325	58.6263	-1.2336	2.19597e-05	7.67614e-05
HERVIP10F_3p21.31	1006.85	952.881	424.862	168.108	0.876148	2.19669e-05	7.67614e-05
HERVW_5p12	50.4369	167.993	0.970595	5.38847	1.29568	2.20078e-05	7.68433e-05
HML1_10p15.1	315.444	1045.08	8.03486	25.9747	1.8705	2.20976e-05	7.70954e-05
HML2_6q25.1	120.543	97.0929	238.875	213.826	-1.14135	2.21278e-05	7.71391e-05
HML2_1q22	4351.12	4348.41	1805.54	923.442	0.919971	2.21667e-05	7.72135e-05
HERVH_14q11.2a	333.442	454.939	502.642	260.917	-1.09389	2.23798e-05	7.78937e-05
HUERSP2_21q21.1b	13.9784	41.0179	0	0	0.985455	2.25998e-05	7.85969e-05
HERVL_10q11.21b	3.15125	5.68583	12.4114	11.1653	-0.885903	2.28676e-05	7.94655e-05
MER101_3q13.11b	12.2687	38.4976	0.430369	2.13725	0.954177	2.29732e-05	7.97692e-05
HERVH_5q31.1g	15.7368	43.2384	0.0772334	0.529485	0.9937	2.33958e-05	8.1172e-05
HERVL18_11q12.2	9.97223	15.5777	25.6221	21.911	-1.15731	2.36678e-05	8.20509e-05
HERVH_9q33.1b	10.4694	19.3987	0.805619	3.5596	0.980564	2.3707e-05	8.20923e-05
HERVL18_5p14.3	21.4153	102.822	0.602893	2.4978	1.0154	2.37172e-05	8.20923e-05
HML3_4p15.1	33.0928	137.859	0.268234	1.83892	1.14217	2.42169e-05	8.37558e-05
HML3_12q13.12	59.1575	106.241	8.01449	13.3843	1.46045	2.4353e-05	8.41601e-05
ERVLE_2p13.2a	180.679	118.215	297.803	139.518	-0.811375	2.44976e-05	8.45928e-05
HERVH_1p32.3e	14.0278	38.0513	47.0302	51.7984	-1.50992	2.45816e-05	8.4816e-05
MER4_17q11.2a	27.1121	70.7905	4.35436	5.84702	1.10209	2.46375e-05	8.49423e-05
HERVIP10FH_11p15.5	8953.24	32861.8	2738.53	2051.44	-1.71346	2.47881e-05	8.53334e-05
HERVH_1p34.2a	157.081	129.637	76.9542	35.6081	0.823629	2.47899e-05	8.53334e-05
HML5_8p23.2b	26.7275	143.842	18.1428	13.5285	-1.19942	2.49309e-05	8.57514e-05
HERVH_11q14.1f	15.6139	16.4436	5.53849	10.8086	1.03814	2.51639e-05	8.64848e-05
HERVL40_7q21.12a	10.3001	13.2475	25.1435	18.9012	-1.05268	2.54072e-05	8.72528e-05
ERVLE_2q11.2a	214.528	159.781	110.763	59.9741	0.854521	2.60783e-05	8.94873e-05
MER41_15q22.31b	75.7773	54.4221	138.842	88.4779	-0.946736	2.61186e-05	8.95552e-05
HERVH_12p12.2b	81.8675	188.337	5.47428	23.5969	1.64283	2.70433e-05	9.26533e-05
ERV316A3_7q21.3c	15.5231	33.7787	1.73541	4.0632	1.02628	2.72909e-05	9.34288e-05
HML1_19p13.2	32.09	41.9219	54.0424	29.9053	-1.08036	2.73293e-05	9.34871e-05
HERVL_20p13	123.491	73.6937	72.9089	32.859	0.673468	2.73535e-05	9.34968e-05
HERVIP10FH_6q26b	232.927	1279.43	2.8169	5.81236	1.47182	2.74575e-05	9.37792e-05
ERVLE_5q31.1c	42.2857	42.9899	85.2686	62.3863	-1.03292	2.90396e-05	9.91057e-05
MER4_16q24.3	465.621	403.915	725.945	386.63	-0.781085	2.92008e-05	9.9578e-05
MER41_4p15.31	25.3824	72.4805	0.767767	2.46618	1.12742	2.93538e-05	0.000100022
HERVFH19_13q34	15.9165	17.4113	34.0691	25.6747	-1.1016	2.9539e-05	0.000100575
ERV316A3_18q22.3e	305.989	295.281	130.46	72.4936	1.02828	2.97736e-05	0.000101295
ERV316A3_9p13.3b	217.868	510.137	5.62305	8.27731	1.83512	3.0199e-05	0.000102663
ERV316A3_12q23.3a	14.3652	21.5401	2.50729	5.03641	1.04707	3.04615e-05	0.000103475
ERVLE_1q23.1a	87.3163	376.43	2.52487	5.23481	1.386	3.05643e-05	0.000103743
HERVIP10FH_Xp21.1	146.911	162.95	194.373	79.9686	-1.12137	3.06188e-05	0.000103848
HERVH_6q16.1a	110.731	420.02	0.785789	2.78988	1.5163	3.08874e-05	0.000104678
ERV316A3_15q25.1b	51.295	52.5392	19.3754	16.1774	1.0497	3.09967e-05	0.000104967
HML3_9q34.13	55.8087	47.1544	97.4319	51.0186	-1.00181	3.10886e-05	0.000105197
HERV3_19p12e	89.5625	170.48	97.6018	56.2722	-1.34325	3.1515e-05	0.000106558
HERVH_17q12	609.607	1648.69	20.5292	26.763	2.20047	3.16427e-05	0.000106907
MER4_4p12c	20.0541	27.1657	4.58925	7.3569	1.08505	3.18631e-05	0.000107569
ERV316A3_21q21.1f	46.3117	114.18	0.356871	2.44658	1.32104	3.19479e-05	0.000107772
HUERSP3B_3q26.31a	153.42	300.369	36.1109	30.4039	1.33644	3.30337e-05	0.000111349
PRIMA41_4q13.3	7615.28	4120.7	4868.36	2085.95	0.569502	3.32535e-05	0.000112004
HERVH_9q33.2a	14.3274	37.4296	33.8583	32.7012	-1.36365	3.33533e-05	0.000112253
HERVH_7q21.2	162.731	169.017	258.629	123.735	-0.949659	3.40435e-05	0.000114427
MER4B_11q12.1	365.637	198.196	202.526	126.478	0.799253	3.40513e-05	0.000114427
HERVL_7q31.32	79.7128	91.6906	21.6091	17.6302	1.29089	3.42435e-05	0.000114985
MER61_5p13.2	52.4991	83.0257	101.155	94.9546	-1.42784	3.43463e-05	0.000115242
MER4_6p12.1	13631.9	34347	144.003	446.56	3.58342	3.45078e-05	0.000115695
ERV316A3_11q22.1m	14.9589	32.7599	1.36634	3.00998	1.01557	3.45987e-05	0.000115873
HERVIP10FH_9p13.3	14.0557	19.4171	44.2314	50.1263	-1.21495	3.46139e-05	0.000115873
HERVFH21_Xq11.2a	101.308	125.827	34.0942	75.8603	1.75883	3.48011e-05	0.000116411
HERV3_19p12b	174.156	314.69	187.503	98.4313	-1.41658	3.54561e-05	0.000118511
LTR25_2q12.1	90.895	81.8868	41.1589	31.3627	1.00907	3.56706e-05	0.000119138
HUERSP3B_19q13.31c	23.7791	93.5498	1.18609	3.00904	1.00839	3.59543e-05	0.000119994
HML1_8q12.1	28.0058	119.559	2.8441	5.40756	1.02462	3.61456e-05	0.00012054
ERVL_3q26.1a	23.5576	90.149	0	0	1.06277	3.66218e-05	0.000122035
MER101_9q34.3	21.8844	28.7827	6.47459	9.17075	1.09667	3.67349e-05	0.00012232
HERVW_12q14.1	25.9762	88.7287	2.6167	4.70461	1.04355	3.7117e-05	0.000123498
HERV3_7q34c	68.5538	79.9063	25.6468	21.3763	1.17284	3.74413e-05	0.000124483
HERVH_2p16.1e	71.8251	435.213	0.640999	2.28447	1.09978	3.79118e-05	0.000125873
HUERSP2_Yq11.221	1.29777	4.79497	10.2879	12.6003	-0.904676	3.7917e-05	0.000125873
HERVL_13q12.12	34.6991	162.41	31.8333	30.1805	-1.31514	3.83525e-05	0.000127153
ERVLB4_8q13.2	18.6012	29.4239	2.02506	4.65061	1.13529	3.83606e-05	0.000127153
MER61_3q13.11	7.27589	10.9559	26.5544	44.2809	-1.08873	3.84222e-05	0.000127261
HUERSP2_13q12.11	23.8111	121.843	0.0772334	0.529485	1.00139	3.87339e-05	0.000128196
HERVFRD_6q22.31	3.60372	7.24277	15.715	16.8213	-0.956186	3.89399e-05	0.000128781
HERVS71_19p12b	7.25015	41.1524	16.142	21.5427	-1.09673	3.92414e-05	0.00012968
HERVL40_12p11.21	37.7941	26.5612	17.0387	15.692	1.03991	3.98784e-05	0.000131685
ERV316A3_2q34f	10.6324	10.7647	23.7609	16.281	-0.922246	3.99081e-05	0.000131685
HERVIP10F_1p35.2c	99.5255	348.079	6.202	9.15901	1.43157	4.00216e-05	0.00013196
ERV316A3_5q35.1a	24.1291	75.0248	0.229425	1.57286	1.07088	4.00541e-05	0.000131968
HERVH_4q22.1f	12.9878	31.7313	0.54323	2.16689	0.973989	4.10302e-05	0.000135082
HERVIP10FH_6q22.1	92.159	103.756	138.829	59.7552	-0.826205	4.13823e-05	0.000136139
ERVLE_1p22.1a	9.2448	13.6771	1.93942	4.06764	0.861671	4.18404e-05	0.000137543
HML4_10p15.1	81.5306	280.591	4.24454	7.01223	1.4203	4.18958e-05	0.000137622
ERVLB4_21q22.2	1.69993	8.99325	9.43013	11.265	-0.894032	4.24164e-05	0.000139227
PRIMA41_13q13.1	1.32521	7.8884	10.7805	13.9667	-0.927316	4.25546e-05	0.000139577
HERVH_Xq27.2a	15.5041	48.0685	0.530448	2.69727	0.984337	4.29787e-05	0.000140862
HERVH_6q22.31a	61.5801	222.464	1.60472	4.6876	1.30123	4.30642e-05	0.000141037
ERVLE_5q31.3d	21.5442	23.4096	42.8173	29.9529	-1.04862	4.32598e-05	0.000141572
MER61_Yp11.2d	95.2661	285.434	5.01833	28.0797	1.51445	4.46773e-05	0.000146101
ERV316A3_5p15.2a	13.5117	36.9551	0	0	0.924154	4.47485e-05	0.000146225
HML1_19q13.41a	33.4396	38.3042	9.70203	10.6829	1.12687	4.5206e-05	0.00014761
ERVLE_19p13.2c	23.1482	19.6827	10.3025	13.6953	1.04045	4.53281e-05	0.000147899
HERVH_2p24.3a	322.616	1005.49	10.3105	12.9056	1.84253	4.54113e-05	0.00014806
HML3_17q21.32	2807.91	6873.65	106.608	111.891	2.3567	4.56328e-05	0.000148671
HML5_8p12	3.09172	12.5125	12.2534	14.4808	-0.935143	4.71419e-05	0.000153474
HERV4_1q22b	3205.63	1473.27	2207.44	792.306	0.486687	4.72527e-05	0.00015372
MER4B_15q22.2a	18.7695	42.5209	2.09862	5.90598	1.06982	4.73324e-05	0.000153865
MER4_1p21.3	523.863	304.241	766.051	289.437	-0.768299	4.78494e-05	0.000155431
HERVH_2p16.1a	376.766	577.617	37.759	22.6065	1.71936	4.81371e-05	0.000156249
ERVLE_5q14.3h	9.13979	19.0975	0.937878	2.58125	0.866967	4.83699e-05	0.000156792
ERV316A3_16q21f	12.558	38.6244	0.194971	1.33665	0.907614	4.84124e-05	0.000156792
ERVLE_6q25.2a	21.5975	70.8771	115.395	195.646	-1.86486	4.84359e-05	0.000156792
HERVI_9q34.13	169.045	239.101	55.2393	32.7692	1.06196	4.84473e-05	0.000156792
ERVLE_12q13.11b	10.6113	12.8044	23.3348	15.8254	-0.998134	4.86315e-05	0.000157272
HML1_5p14.1	4.17314	7.87946	15.3195	15.9247	-0.998377	4.89657e-05	0.000158236
HUERSP3B_19q13.2	14.8085	33.4416	0.7441	2.86961	0.977546	4.97699e-05	0.000160716
ERVLE_7p22.3	120.797	200.332	32.5819	36.6921	1.388	5.01062e-05	0.000161683
ERV316A3_6q22.31f	13.08	34.8584	0.616944	2.14497	0.956516	5.03881e-05	0.000162473
ERVLE_18q21.33	20.5844	19.578	7.21871	9.0234	1.02937	5.095e-05	0.000164164
HERVL_3q29	2.41534	5.40087	11.3687	14.5453	-0.87303	5.11224e-05	0.000164598
HUERSP3_19q11	23.5634	51.6341	38.4191	27.1563	-1.16636	5.1573e-05	0.000165927
MER4_1p13.2b	11.2988	17.771	2.32699	5.15764	0.923203	5.18233e-05	0.00016661
HERVH_5q34d	13.84	17.4775	3.97679	6.30366	0.919574	5.21786e-05	0.00016763
HARLEQUIN_7p14.3	131.596	118.062	223.999	143.122	-0.873696	5.22417e-05	0.000167709
HERVL_5p15.2d	12.4424	29.6674	0	0	0.934715	5.24249e-05	0.000168174
HERVIP10FH_2q14.3a	9.59227	8.88996	3.89236	6.31682	0.848655	5.28125e-05	0.000169294
HERVH_10q23.31d	106.207	342.753	1.28667	4.84604	1.45786	5.31036e-05	0.000170102
ERVL_14q22.1	29.0468	33.5472	65.0336	50.7345	-1.21169	5.35432e-05	0.000171385
MER4_12q12b	5.02008	11.1608	16.4987	19.7888	-0.992451	5.37008e-05	0.000171764
HERV9_8q11.23b	10.7702	27.7462	0.901971	2.72827	0.889394	5.38345e-05	0.000172066
HERV9_17q22a	4.70909	12.8879	17.1755	20.3805	-1.05695	5.43594e-05	0.000173617
MER4_4p16.3a	287.588	185.19	157.059	82.045	0.787652	5.53467e-05	0.000176642
ERVLB4_11p15.4c	8.34419	13.5996	18.4238	14.4631	-0.971491	5.60105e-05	0.00017863
PABLB_8q21.11	31.9953	47.2687	7.73326	8.35183	1.09835	5.66896e-05	0.000180665
ERV316A3_4q24d	10.9803	26.3372	1.49872	4.60552	0.921498	5.69756e-05	0.000181444
HML2_22q11.23	82.2264	197.138	118.361	213.225	-1.74541	5.72223e-05	0.000182097
HERVL_1p22.2d	44.779	43.8209	73.0783	41.0734	-0.845561	5.73031e-05	0.000182222
ERV316A3_4q32.1h	10.995	25.6665	0	0	0.941531	5.78247e-05	0.000183748
HERVH_2p12h	19.8904	51.5936	0.596087	3.18565	1.06541	5.84579e-05	0.000185625
HML3_15q12	1.67004	3.94036	10.451	13.3761	-0.845462	5.87476e-05	0.00018641
ERV316A3_10p14b	12.2051	34.2542	0.304988	1.49427	0.890191	5.94208e-05	0.00018841
HERVH_2p13.3d	15.4448	34.1766	1.63709	5.26579	1.03864	5.96342e-05	0.000188949
MER41_Xq13.3b	17.8365	19.4096	34.7526	21.2464	-1.05563	5.97729e-05	0.000189252
ERVLE_12p11.21b	73.7093	58.2392	117.023	71.3354	-0.789394	6.00545e-05	0.000190006
PRIMA4_21q22.3	26.6156	19.2599	50.1441	30.9956	-0.952234	6.01922e-05	0.000190305
MER4_3p25.1b	35.4638	56.8596	5.45797	7.82268	1.25225	6.04699e-05	0.000191045
ERVLE_17q24.3a	3.26687	6.45799	16.574	25.4082	-0.990621	6.07285e-05	0.000191724
MER41_6q26b	30.1658	164.267	0	0	0.978614	6.08301e-05	0.000191906
ERVLE_12q24.23	24.3806	26.6715	8.89697	10.3428	1.01228	6.12486e-05	0.000193087
MER4_1q44a	69.047	132.997	5.34517	6.71841	1.42889	6.19551e-05	0.000195066
ERV316A3_5q35.3c	30.3317	89.6367	1.9854	4.43915	1.16423	6.2013e-05	0.000195066
HERVL_6p21.33b	45.0642	60.2407	179.688	329.301	-1.4328	6.2047e-05	0.000195066
ERVLE_8p21.3d	1.29974	3.97404	9.52122	13.0306	-0.845536	6.20543e-05	0.000195066
HUERSP3B_10q21.1b	14.3155	37.938	0.185816	1.27389	0.95655	6.23033e-05	0.000195708
ERV316A3_6p25.1b	253.014	160.291	148.618	70.013	0.685034	6.25536e-05	0.000196354
HERVH_11q23.3a	41.7978	89.7952	53.3256	36.6518	-1.20179	6.28965e-05	0.000197289
PABLA_1q25.1	428.946	469.396	896.315	483.354	-1.32019	6.31416e-05	0.000197916
HERVL_15q26.2b	2.36866	7.01057	10.223	11.9429	-0.914841	6.3526e-05	0.000198978
ERVLB4_17q12	10.5897	13.8879	28.4563	26.5105	-1.11228	6.50979e-05	0.000203756
HERVH_17q25.3	101.151	74.2581	170.983	106.206	-0.862912	6.52888e-05	0.000204208
PRIMA4_Xp11.21	40.5238	40.8171	63.4913	32.6161	-0.991914	6.69066e-05	0.000209119
ERVLE_4q35.1b	10.2627	15.8393	1.42401	3.2774	0.91392	6.77143e-05	0.000211493
HERVL_6p12.3a	11.9426	44.872	0.493845	1.76739	0.860954	6.78354e-05	0.00021172
HML2_4p16.1a	267.046	444.691	1045.41	2617.73	-1.51909	6.91448e-05	0.000215653
MER4_5q14.1	40.2312	29.1033	20.5334	18.7833	0.944748	7.13183e-05	0.000222274
HERVL66_19p12j	15.9024	30.0276	32.8907	30.9367	-1.18294	7.14918e-05	0.000222656
HERVH_7q35a	147.814	300.998	9.87833	16.0471	1.8047	7.15649e-05	0.000222726
HERVIP10FH_10q23.33	218.116	1421.38	0.154467	1.05897	1.1626	7.4082e-05	0.000230396
MER41_9q22.32	52.174	83.369	11.3042	13.06	1.22928	7.44085e-05	0.000231247
HERVH_Yp11.2e	84.9233	187.202	10.2251	18.2438	1.49697	7.46162e-05	0.000231728
HERVH_10p12.1b	39.7343	192.862	1.79348	6.68393	1.09807	7.52104e-05	0.000233408
HERVH_7p22.1a	9.575	15.1305	32.6833	33.2035	-1.1959	7.53664e-05	0.000233726
HERV9_19p13.2	11.0851	24.3953	1.91595	4.17367	0.881406	7.61226e-05	0.000235905
MER101_18q21.1b	1072.8	726.401	1519.15	585.812	-0.601619	7.66113e-05	0.0002371
HERVL40_4q31.3b	173.21	115.091	290.046	220.209	-0.77697	7.66166e-05	0.0002371
HERVL_12q13.3	16.5634	22.1882	4.77025	7.67916	0.986757	7.68226e-05	0.00023757
ERVLB4_19q13.31c	23.1141	24.2256	7.68287	9.25808	1.01892	7.70462e-05	0.000238093
ERVLE_21q22.3b	28.619	73.212	3.08992	11.8203	1.20308	7.71574e-05	0.000238269
MER4_1p34.1c	309.341	222.802	155.868	75.2951	0.784598	7.75095e-05	0.000239188
LTR19_12q23.3	36.1827	80.95	4.48375	9.18482	1.22245	7.76962e-05	0.000239595
ERVLE_15q13.3a	13.4255	17.3224	3.17644	5.44301	0.937147	7.95375e-05	0.000244982
MER4_Xq21.33e	0.937989	4.23042	9.85771	16.2252	-0.844408	7.9555e-05	0.000244982
MER41_Xq21.33b	138.237	381.238	0.349322	1.675	1.47	7.994e-05	0.000245995
MER41_3q13.31b	192.039	142.344	98.8506	61.967	0.81325	8.07162e-05	0.000248209
HARLEQUIN_4q22.1a	24.3947	68.9148	2.09146	4.4327	1.06331	8.10269e-05	0.00024899
HERV4_8q21.13b	31.6934	31.879	11.432	10.2503	1.03036	8.3421e-05	0.000256167
MER61_4q32.3	29.5423	73.7771	0.719568	2.44669	1.11775	8.37816e-05	0.000257095
HERVL_2q32.1e	44.2745	40.4945	15.8019	15.4456	1.10341	8.41771e-05	0.000258127
HERVH_9q22.33a	84.4712	194.121	5.22474	9.3956	1.49249	8.58257e-05	0.000262999
HERVIP10F_1q25.1	30.1336	58.2326	3.21576	6.07946	1.16887	8.62665e-05	0.000264165
ERVLE_11q22.3l	9.95192	20.3934	0.845897	2.8966	0.891645	8.76138e-05	0.000267996
PABLB_Xp21.1c	10.97	18.2317	20.657	14.2758	-1.02734	8.764e-05	0.000267996
HERVL40_5p15.2	10.4053	29.8643	0	0	0.847539	8.78927e-05	0.000268397
HERVL18_Xq13.3	10.6957	31.4073	0.252415	1.30997	0.806	8.78935e-05	0.000268397
PABLA_2q12.3	10.6868	33.6612	0	0	0.848517	8.87973e-05	0.000270968
HARLEQUIN_11q22.1b	5.06833	11.7528	15.9125	17.1231	-0.997666	8.91589e-05	0.000271882
HERVH_5q13.3b	12.4148	15.2109	27.627	22.3745	-1.0289	8.94532e-05	0.00027259
HERVH_11p15.1b	527.9	3260.74	0.891556	3.51065	1.50241	9.06181e-05	0.000275947
ERVL_1q41	13.8626	25.3856	2.4819	4.83867	0.928653	9.07453e-05	0.000276143
MER61_2p24.2	20.6193	28.1292	4.42235	7.06081	1.07682	9.13886e-05	0.000277908
HERVH_12p12.3d	10.6248	38.0833	0.152494	1.04545	0.848699	9.22453e-05	0.000280318
HML5_1q42.12	125.274	122.126	34.0023	22.2297	1.22805	9.4824e-05	0.000287955
HERVH_3q21.3a	31.3534	40.9877	58.6817	43.5463	-1.15565	9.54209e-05	0.000289493
HERVH_2q24.3c	31.379	81.9344	1.76911	5.77362	1.17073	9.54626e-05	0.000289493
ERVLB4_9q21.33a	14.6636	42.6811	0.117489	0.805462	0.937412	9.62771e-05	0.000291761
HERVH_3p22.2a	25.4412	28.4037	53.732	42.8072	-1.13787	9.63568e-05	0.000291801
HERVH_15q14b	143.088	809.634	0.0772334	0.529485	1.22721	9.69119e-05	0.000293279
HERVH_8q21.13a	94.9068	266.942	0.881621	2.71648	1.40421	9.74e-05	0.000294553
HERVEA_1p21.1a	102.652	218.445	266.488	319.965	-2.00183	9.80131e-05	0.000296202
MER61_7q21.11	107.426	191.424	11.9124	23.1025	1.6091	9.8732e-05	0.000298169
HARLEQUIN_4q22.1b	14.0567	32.784	1.18894	4.20782	0.971332	9.94883e-05	0.000300246
HERVL_4p16.3a	97.7067	50.562	169.069	97.4107	-0.725309	0.000100319	0.000302545
HARLEQUIN_17q25.3b	14.6799	24.4483	29.9903	26.1384	-1.07784	0.000100473	0.000302801
ERV316A3_11q23.3f	9.22542	13.476	20.9819	18.0795	-0.967104	0.000102279	0.000308032
ERVLE_3q11.2h	12.3218	37.2344	0.205556	1.01688	0.903667	0.000104809	0.000315435
MER61_4q21.1b	16.5762	37.6242	3.45507	6.29668	0.961417	0.000106584	0.000320556
ERV316A3_7q21.11d	0.71743	2.85229	9.56269	16.0992	-0.821104	0.000106991	0.000321561
PRIMA41_19q13.2a	39.1945	41.0462	15.945	19.411	1.12146	0.000107086	0.000321625
ERVLB4_18q11.2	12.3253	18.8131	1.8888	3.73643	0.935575	0.000108296	0.000324814
MER34B_7q36.3a	11.9485	33.3411	1.3618	3.64164	0.888466	0.000108296	0.000324814
MER101_2p25.2	178.85	169.885	283.038	169.217	-0.966582	0.000108697	0.000325756
MER4_4p16.1a	16.1479	48.0903	0.39682	1.66337	0.927679	0.000108759	0.000325756
HERV9_12q24.32	18.4082	93.1776	0	0	0.884545	0.000109705	0.000328365
LTR57_5q31.1	58.0971	53.4704	109.722	77.2814	-0.857696	0.000111646	0.000333946
HML2_1q23.3	135.188	196.669	585.295	1223.02	-1.6825	0.000113537	0.000339372
HERVH_12p13.2a	170.875	734.473	85.5481	65.7459	-1.58007	0.000115363	0.000344596
MER4_10p15.1	826.967	1583.15	92.0026	90.1116	1.61731	0.000115749	0.000345513
ERVLE_4q35.2c	10.015	22.5278	0.516637	2.04254	0.893249	0.000116865	0.000348605
HERVH_Xp22.33	61.0389	113.288	9.01387	12.2641	1.3182	0.000117465	0.00035008
HERVW_2p25.3	31.3189	90.6924	1.69005	4.12394	1.09529	0.000117519	0.00035008
HERV9_Yq11.223b	0.158446	1.08625	31.6866	56.0742	-1.15646	0.000118231	0.000351961
ERVLE_15q24.3d	15.8546	19.6731	28.4188	18.9	-0.965384	0.000118391	0.0003522
HERVH_8q22.1c	72.6341	50.2002	36.027	28.6849	1.03633	0.000118688	0.000352842
ERVLE_7q22.1c	196.825	102.068	117.01	55.8744	0.681649	0.000120176	0.000357024
MER41_3p14.3a	22.1358	89.9706	1.0429	2.89388	0.968635	0.00012175	0.000361455
ERVLE_2q22.3b	9.14266	15.6571	1.27075	3.31429	0.874353	0.000121927	0.000361574
ERV316A3_Xq28k	3.04475	9.65816	11.2313	11.881	-0.869348	0.000121955	0.000361574
MER4B_7p14.3	188.762	129.679	105.71	73.5485	0.768989	0.000122111	0.000361792
HERVH_6q23.2e	9.62914	21.2506	0.846541	3.35752	0.877628	0.000122649	0.00036314
MER41_6q26a	44.8977	171.213	0.93622	2.91328	1.14279	0.000122753	0.000363203
HERVL_3q26.33	12.4329	31.9293	0.701744	2.96318	0.893675	0.00012508	0.00036984
LTR25_12p11.22b	40.1752	56.1138	67.2385	54.6944	-1.10629	0.000125262	0.000370126
MER4_Xq22.3c	14.2407	52.1258	0.143332	0.982636	0.857359	0.000125504	0.000370592
HERVH_3q26.1c	16.2675	41.037	1.67055	5.80141	0.979828	0.000125712	0.000370955
ERVLB4_19q13.33a	11.115	24.2497	1.78181	4.40554	0.907434	0.000126761	0.000373801
HML1_19q13.43	5247.91	2402.51	3567.51	805.476	0.453468	0.000127663	0.000375967
MER4_4p16.1b	10.0614	28.5435	0.30494	1.47552	0.818683	0.000127667	0.000375967
HERVP71A_6q14.1	22.0248	25.1949	39.8023	29.0464	-0.95811	0.000128273	0.000377498
HERVEA_6q22.31	324.912	588.459	484.383	614.978	-1.80226	0.00012952	0.000380856
HERVH_1q32.2a	43.696	69.5944	11.144	31.9013	1.36097	0.000129588	0.000380856
PABLA_16p13.3a	541.427	264.697	357.878	162.309	0.603845	0.000130539	0.000383393
HERVL74_10p11.22	504.589	335.7	740.037	344.185	-0.670612	0.000130807	0.000383923
HERVI_22q11.1b	25.7894	73.9498	0.640131	2.75085	1.0297	0.000131369	0.000385315
HERVH_1p36.12	91.5157	430.15	2.08086	4.572	1.24899	0.000133496	0.000391291
LTR46_9q22.33	9.82378	21.5718	0.893008	2.8006	0.847333	0.00013485	0.000394996
ERVLB4_6q27d	6.17244	23.0469	19.3795	24.9575	-1.09495	0.000136075	0.000398317
ERVLE_6p22.2a	12.7563	32.093	0.773659	2.90352	0.884266	0.000136847	0.000400311
HERVL_4p15.31d	16.7784	51.482	0	0	0.951476	0.000137231	0.000401166
HML3_8q13.2	38.5731	74.8898	72.983	81.9104	-1.31488	0.00013851	0.000404635
HERV3_19q13.42a	47.7492	46.6555	17.989	14.624	1.03033	0.000139231	0.000406468
HERVH_15q26.1c	424.627	2721.89	11.5306	36.0878	1.32875	0.000141286	0.000412193
HERVH_1q41c	18.6054	42.2312	0.77277	2.39245	1.03274	0.000141977	0.000413934
HERVFRD_19p12	3.54196	8.51972	12.6542	12.9736	-0.908908	0.000142337	0.000414709
MER4_2q21.1e	22.6761	89.1517	0.132204	0.906347	0.897536	0.000142489	0.000414876
MER4_Xq21.31f	25.7188	90.256	0	0	1.03452	0.000143435	0.000417351
HERVH_Xp22.32b	188.449	1001.67	0.389029	1.87745	1.36282	0.000144193	0.00041928
HML6_20p13	13.4554	13.3496	40.7197	46.0072	-1.00406	0.000144738	0.000420586
HUERSP3B_11q14.3	13.3209	33.1516	0.518308	2.53659	0.919847	0.000145428	0.00042231
ERVLE_2q23.3a	2.869	5.62615	11.8916	13.7566	-0.801156	0.000145661	0.000422705
ERVLB4_14q21.1a	15.8151	18.1337	33.7834	26.2816	-1.03448	0.000146166	0.00042389
ERVLE_5q31.1h	13.0697	48.6497	0	0	0.838492	0.00014668	0.000425099
ERVLB4_16q12.1	14.2119	34.6156	2.27249	5.53717	0.908753	0.000147787	0.000428025
HERVS71_11p15.4	50.1265	107.715	60.2314	39.5572	-1.2221	0.000148012	0.000428124
HERV3_Xq21.31	16.8151	61.9746	0	0	0.901276	0.000148016	0.000428124
ERVLE_5p15.31a	16.8033	27.8137	3.63431	5.46375	0.971114	0.000150394	0.000434715
HERVIP10FH_20q13.12	133.184	128.886	58.7875	44.3109	1.02688	0.000150525	0.000434807
HML2_15q25.2	38.2614	43.7103	13.712	20.8669	1.20219	0.000151236	0.000436571
HERVH_Xp22.31	65.318	190.693	1.6383	6.49182	1.30467	0.000155302	0.000448015
MER4_7q21.12	11.3479	13.2662	4.47668	10.6807	0.885311	0.000155464	0.000448185
ERVLE_18q11.2a	11.2503	15.4923	25.0636	20.0707	-0.987567	0.000156245	0.000450141
ERVLE_Xq26.3h	29.2854	79.3606	1.06213	2.90382	1.07778	0.000156535	0.000450682
HERVFH19_Xp11.3b	11.2107	20.7768	2.10981	5.27282	0.889096	0.00015715	0.000452156
HERVFH21_19p12	18.9269	50.6077	3.18558	5.55943	0.921764	0.00015849	0.00045571
HERVL_4q31.21b	174.359	118.405	94.3408	46.4255	0.724394	0.000158726	0.000455852
HERVL_2p25.3a	9.80561	20.1832	0.638493	2.61181	0.875187	0.000158747	0.000455852
MER41_3q13.13	31.5241	121.5	0.545785	3.0379	1.03662	0.000158998	0.000456274
HERVL74_17q12	1321.65	1035.5	1869.53	946.479	-0.824035	0.00015919	0.000456346
ERVLE_18q12.2a	26.522	19.8489	13.2525	11.6709	0.862478	0.000159232	0.000456346
HERVW_Xq22.3c	282.667	211.535	416.253	183.735	-0.778621	0.000159933	0.000458056
HERVH_11q22.2	655.702	1867.75	9.66943	10.8312	1.85634	0.000161546	0.000462373
HML3_12q23.3	51.7842	77.5133	12.0977	12.1945	1.20887	0.000162212	0.000463978
HERVL_3p26.2	15.5193	18.2137	5.24445	7.93869	0.902789	0.000162586	0.000464332
HERVH_5p15.2a	43.1681	120.874	2.50142	7.0359	1.18547	0.000162651	0.000464332
HERVH_Xp22.2c	36.9506	194.327	0.81991	3.12343	0.969927	0.000162654	0.000464332
MER34B_13q32.2	28.8064	52.6934	3.67052	7.48503	1.15947	0.000168604	0.000481003
ERVLB4_8p21.1a	62.7761	80.4023	21.6825	19.3373	1.11833	0.000169382	0.00048291
HERVL40_5q14.3d	0.995058	3.48782	9.21583	12.6862	-0.794135	0.000170279	0.00048515
MER61_1p22.2b	17.068	29.064	3.95014	6.60653	0.96425	0.000170625	0.000485822
HARLEQUIN_Yq11.221c	74213.3	48485.4	46865.4	24251.9	0.557609	0.000173237	0.000492938
ERVLB4_8q21.13d	209.109	247.563	365.351	428.78	-1.10348	0.000174884	0.000497302
MER61_11q13.4	37.0713	70.4077	55.5735	38.3888	-1.07622	0.00017731	0.000503874
HERVH_1p34.2b	19.0575	46.2869	1.05922	4.51483	1.03939	0.000177696	0.000504458
HERVL_6p24.3a	10.871	11.3524	27.4733	30.336	-0.935281	0.000177746	0.000504458
HML3_19p12b	241.735	157.807	344.741	149.798	-0.650851	0.000178721	0.000506896
HERVE_4p16.3c	53.0673	172.066	2.12934	5.78632	1.18365	0.000178898	0.00050707
ERV316A3_15q14a	39.3077	37.888	18.2934	16.3709	0.938289	0.000180322	0.000510777
HERVL_Xq11.1a	126.054	117.214	164.018	49.9855	-0.853802	0.000181249	0.000513072
HERVL_6q23.2a	14.705	25.847	2.60245	5.32104	0.921717	0.000182951	0.000517555
HERV3_13q32.3	8.21598	11.2923	2.3893	5.27681	0.807244	0.000183102	0.000517648
HERVIP10F_8p22	2.99501	8.62954	14.1118	20.0934	-0.91681	0.000183792	0.000519263
HERVH_8q24.23a	142.798	576.182	2.0704	5.26701	1.40328	0.000185306	0.000523203
HERVK14C_Yp11.2a	111.49	267.131	6.14147	24.5619	1.50145	0.000187202	0.000528216
HERVL_1q31.2c	15.5111	25.5604	35.4689	35.0951	-1.04654	0.000188621	0.000531877
HERVL66_18q12.1	342.03	762.436	66.3076	50.4534	1.46099	0.000190714	0.000537434
HERVH_6q14.1f	9.44137	28.5014	0.607712	2.07549	0.78967	0.000191191	0.000538431
ERVLB4_2q37.1b	49.9135	42.839	21.1855	14.4457	0.963051	0.0001915	0.000538956
HERVH_7p14.3d	185.182	145.56	95.2144	48.537	0.825139	0.00019194	0.000539848
MER101_2q36.3	22.6395	25.0757	37.4382	21.277	-0.946868	0.000194707	0.000547277
HERVL40_3q13.13b	17.6662	84.2487	0.316279	1.56792	0.789213	0.000194883	0.000547422
MER4_3p25.1a	71.7782	106.502	11.6547	13.8647	1.37395	0.000195485	0.00054876
MER4_6q22.1b	93.306	77.9079	136.44	69.5542	-0.723845	0.000198799	0.000557707
MER4_2q21.1d	18.2023	86.0675	0	0	0.84782	0.000199393	0.000559016
HERVH_10q23.31a	59.2715	48.973	95.9089	49.63	-0.927568	0.000200857	0.000562759
PRIMA4_1p12b	101.085	177.47	155.963	124.444	-1.5406	0.000204374	0.000572248
HERVL66_19p13.11b	11.0172	13.0391	3.84986	6.4406	0.830735	0.000205103	0.000573922
ERV316A3_2q37.1a	927.929	592.444	1165.61	328.252	-0.542577	0.000205672	0.000575147
HML3_3q27.2a	42.2819	36.3254	20.9493	21.1543	0.980418	0.000208142	0.000581682
MER4B_4p16.1a	11.9107	32.5536	0.215168	1.47512	0.847287	0.000209769	0.000585856
LTR25_3q21.3	10.8391	32.6996	0.185816	1.27389	0.805068	0.000211877	0.000591366
ERV316A3_1p31.1c	1.36175	3.31459	11.5012	19.9713	-0.824913	0.000213352	0.000595105
HML4_16p13.3	3099.4	1523.38	4201.58	1386.99	-0.500918	0.000214578	0.000598144
HERV3_4q13.2b	321.223	1113.74	286.469	281.399	-1.85078	0.000219667	0.000611939
HERVI_18q12.2	9.40638	20.6963	1.40167	3.7521	0.812368	0.000220125	0.000612826
PRIMA41_19q13.2b	43.5361	47.0474	17.0424	24.07	1.11146	0.000220503	0.000613362
HERVH_12q15a	21.9203	28.5909	6.20118	10.5729	1.05464	0.000220666	0.000613362
HERVE_8p12a	44.16	123.454	6.27725	11.5213	1.13806	0.000220738	0.000613362
MER4B_10q22.3	60.1624	52.7472	25.9764	21.5779	0.937495	0.000221304	0.000614547
PABLA_18q23	153.294	207.328	62.223	39.7095	0.979102	0.000221575	0.00061491
MER41_7q21.13	28.5666	40.7303	52.0986	36.8823	-0.965694	0.000225766	0.000626022
HERVH_3q21.3d	1309.56	3867.14	25.6006	31.6023	2.08012	0.000225865	0.000626022
HERVH_5q31.1f	22.2729	64.7899	1.2981	5.22761	0.993562	0.000227978	0.00063148
HERVE_4q31.22	8.17555	9.62818	3.18566	5.12149	0.702716	0.00023053	0.000638143
ERVLE_5p15.33a	37.745	127.914	46.6004	57.1872	-1.30311	0.000233153	0.000644997
MER41_8q12.1a	99.3329	73.4411	55.395	35.6702	0.766824	0.00023516	0.000650141
HERVH_5p15.31a	24.0526	64.068	2.1752	5.67643	0.995841	0.000236377	0.000653091
HUERSP3_2q34	1038.46	1852.17	17.5334	16.9173	2.29157	0.000237202	0.000654957
HERV4_19p12	17.9897	16.6427	8.58127	11.5063	0.911323	0.000240276	0.000663028
HERVFRD_Xq21.33d	13.8214	45.112	0	0	0.814616	0.00024138	0.000665656
HERVH_1q42.2e	1317.61	3544.47	49.9739	55.4552	1.99274	0.000241545	0.000665693
MER4B_Xq13.3	14.0243	15.3215	34.6957	34.1716	-0.990606	0.000242861	0.000668898
MER61_12p13.31b	144.48	770.996	2.13768	7.31124	1.19682	0.000243321	0.000669743
ERVLB4_6q14.2	10.3667	18.0434	2.37797	5.36119	0.860463	0.000248047	0.000682323
MER34B_1q23.3a	220.753	303.829	387.689	401.93	-1.13712	0.000253388	0.000696579
HERVFC1_7q11.21	1276.98	743.649	782.384	397.686	0.646873	0.000254437	0.000699025
MER61_1p22.2a	10.7921	13.4665	3.27508	6.78887	0.844023	0.000258044	0.00070849
HERVH_12q23.2	2.24865	6.05265	14.2057	21.8141	-0.894432	0.000259626	0.000712385
HERV3_Yp11.2c	18.8492	69.8834	0.682549	2.7386	0.899453	0.000260339	0.000713897
ERVL_10p14	17.2766	22.8651	6.30821	11.2764	0.916658	0.000262892	0.000720446
MER4_15q22.31a	34.7046	31.3968	65.0473	54.2689	-0.958563	0.000263537	0.000721762
MER4_12q24.31	9.40619	24.0515	0.962597	3.07597	0.764973	0.00026742	0.000731938
HERVFRD_7q36.2	100.292	629.138	25.361	21.1642	-1.16121	0.000270447	0.000739433
ERVLE_6q24.1a	35.1426	36.6508	12.8592	10.3333	0.929206	0.000270496	0.000739433
HERV3_7q33	1834.84	1342.65	2605.41	1385.48	-0.670565	0.000270966	0.000740256
ERVLE_15q15.1	5.64061	7.81985	18.3011	20.9834	-0.872308	0.000272713	0.000744566
ERV316A3_8q23.1b	16.348	49.4376	1.76266	4.95152	0.891515	0.000276376	0.000754098
HUERSP3B_3q23	115.362	88.2141	63.8213	40.0918	0.754905	0.000279017	0.000760407
HERVL_11q12.1c	168.536	200.359	215.416	86.6388	-0.871625	0.000279036	0.000760407
HERVE_9q22.2a	14.5801	36.5363	1.70802	5.07179	0.929092	0.000281141	0.000765668
ERV316A3_8q22.1d	8.42345	14.1893	1.61747	3.78738	0.79261	0.00028157	0.000766337
ERV316A3_4p15.2e	2.23226	5.92106	11.4296	15.0009	-0.804559	0.000281736	0.000766337
HERVL_5q33.3	47.7683	58.6123	74.5013	50.289	-0.925685	0.000283529	0.000770735
ERVLE_11q21c	5.76948	9.80331	15.9743	16.0746	-0.853108	0.000285407	0.000775359
MER61_Xq25a	23.5955	54.5688	2.07624	4.7438	1.00083	0.000285835	0.00077604
PABLA_7q21.13	39.5621	51.8053	69.1498	48.7488	-1.05972	0.000286049	0.000776141
HML5_2q31.1b	26.5163	37.4432	7.09954	9.20353	1.02587	0.000286647	0.000777283
HERVH_10q25.1c	13.1268	22.3323	2.88335	6.11672	0.930621	0.000286862	0.000777385
ERV316A3_9q34.2b	56.565	54.0853	27.5471	37.6252	1.14892	0.000290122	0.000785732
HERVH_11q14.1g	35.8059	28.452	17.7402	16.7838	0.925041	0.000293165	0.000793484
HERVL40_8q11.23b	8.04948	14.4648	21.8091	37.6796	-0.983239	0.000293416	0.000793672
HUERSP3B_3q13.11	40.4283	102.207	11.0503	34.9589	1.1735	0.000296074	0.000800367
MER61_Xp11.21	106.041	74.8119	145.596	58.0739	-0.670779	0.00029686	0.000801998
ERVLE_20p12.3a	3.15207	6.03659	10.0967	9.87576	-0.757786	0.000299703	0.000809178
HUERSP2_3q21.3	71.5546	78.7581	108.092	65.6962	-1.10347	0.000300691	0.000811347
PABLB_20p12.3	21.4884	96.9289	0.578949	2.24915	0.881343	0.000305692	0.000824334
HERVL_17q21.32	154.027	252.725	23.6163	25.6711	1.51632	0.000307493	0.00082868
ERV316A3_14q23.1e	11.8132	18.0882	3.03226	5.72954	0.848153	0.000309485	0.000833536
HERV4_11q21	746.509	1434.87	402.096	208.423	-1.45316	0.00031327	0.000843212
LTR19_1q24.3	15.3715	32.7768	2.9628	7.74824	0.929918	0.000313744	0.000843971
HERVK14C_7q36.1	5.1186	15.5747	17.8759	25.8269	-0.97186	0.000316866	0.000851844
HERVIP10FH_5q31.3	24.5234	25.1406	49.2034	40.3414	-0.925948	0.000317219	0.000852271
HERVH_4q35.2c	90.4584	95.437	31.9158	27.1434	1.13842	0.000318402	0.000854925
HERVIP10F_19q13.41b	12.9767	20.2681	3.819	6.98944	0.852452	0.000319868	0.000858336
HERVP71A_13q21.32	11.1731	39.1343	0.176586	1.21061	0.830894	0.000322939	0.000866046
HERVH_10q24.33a	18.0613	35.7832	3.87132	11.4532	0.997871	0.000325023	0.0008711
HERVIP10F_6q15	14.7747	16.7386	28.438	21.3706	-0.893708	0.000326666	0.00087497
MER61_6q16.3a	30.0697	38.2809	9.65976	13.676	1.01017	0.000329205	0.000881231
MER4_4p16.3b	16.2017	29.9509	4.10278	7.17699	0.868781	0.000330119	0.000883138
ERVLE_10q26.3d	40.9374	105.486	3.24135	5.54054	1.10134	0.000331779	0.000887038
HERVK11_12q23.3b	10.6834	22.7558	1.1398	4.5332	0.867475	0.000332961	0.000889656
MER61_1q25.3	24.571	45.4587	4.53176	7.97591	1.02592	0.000334518	0.000893272
MER4_3p21.31b	128.215	120.419	193.956	148.139	-0.937631	0.000337128	0.000899692
ERVLB4_5q12.1a	1.71582	5.41272	9.72951	13.6318	-0.776102	0.00033821	0.00090203
HERVH_2q13	55.9239	344.005	0.207286	1.42108	0.918319	0.000340163	0.000906689
MER101_6p25.2c	101.355	65.2294	143.113	52.538	-0.623258	0.000340678	0.000907508
HARLEQUIN_4p15.2	6.04981	24.2705	27.1463	41.0312	-1.11376	0.000341395	0.000908866
MER101_10q23.33	9.23967	12.6151	20.3524	15.5962	-0.890825	0.0003421	0.000910191
MER41_11q25	3.47104	7.70344	15.4413	19.1932	-0.871721	0.000346903	0.000922409
ERVLB4_8p23.1b	10.9016	25.1597	2.33121	6.49057	0.849865	0.000347257	0.00092279
MER41_Xp22.2	33.6236	33.488	14.1909	12.8403	0.916494	0.000348305	0.000925013
PRIMA4_2q24.3	62.2748	88.3022	18.1818	20.5229	1.16256	0.000350557	0.000930432
HERVH_10p11.22	23.9018	60.1525	3.1664	5.63854	1.01621	0.000356348	0.000945229
HERVW_17q12a	20.3602	25.0331	34.0432	33.0444	-0.956471	0.000362665	0.000961172
HERVIP10FH_19p12c	53.968	187.647	40.3861	28.2146	-1.16766	0.000362797	0.000961172
HERVL40_15q23	15.9791	29.8814	31.3393	28.7198	-1.00661	0.000364763	0.000965794
HML2_20q11.22	739.983	1127.18	209.123	153.801	1.01393	0.000368511	0.000975129
HERVH_2p24.2	33.2984	84.3703	2.74243	5.93246	1.08582	0.000369809	0.000977973
ERV316A3_21q22.3a	120.425	214.487	15.9281	13.4607	1.31305	0.000370377	0.000978887
MER4_Xq13.1	12.6851	13.8948	4.94904	7.58533	0.844056	0.000372353	0.000983514
ERVLB4_Xq26.3a	324.942	201.308	435.11	132.667	-0.548565	0.000373314	0.000985459
HERVIP10F_19p13.11	206.441	201.386	275.944	106.472	-0.644067	0.000373697	0.000985875
ERVLB4_7q21.13d	16.3449	39.3327	2.9404	4.91644	0.92065	0.00037671	0.000993228
ERVLB4_16q13b	1.65217	3.77474	9.60643	13.0237	-0.736334	0.000379848	0.0010009
HML3_19q13.2	4911.1	13029.8	1246.59	429.524	0.874524	0.00038211	0.00100625
HERVL_5q13.3	8.70737	12.8566	3.15065	7.80137	0.740992	0.000382538	0.00100678
MER61_8q11.23b	215.362	1194.63	2.35301	4.32909	1.21627	0.000382871	0.00100705
HERVH_1p31.3b	105.15	455.848	0.702342	3.36798	1.20463	0.000387224	0.00101765
MER41_6p21.32	41.5139	113.493	5.11626	7.95463	1.02336	0.000387366	0.00101765
MER4_5p12c	170.138	153.615	225.965	100.273	-0.795582	0.000395972	0.00103963
HERVH_3p12.3a	10.6464	21.149	24.4543	24.6292	-0.987501	0.000402119	0.00105514
ERVLE_11q22.1d	11.1013	12.9275	4.55761	6.96064	0.781585	0.000403447	0.00105799
HERVIP10FH_Xq12	10.8784	32.4007	0.959597	3.36175	0.800367	0.000405584	0.00106296
ERV316A3_10q22.3c	10.9529	27.9968	1.80428	5.60135	0.821377	0.000408671	0.00107041
ERVLB4_7q21.3a	4.73927	8.84827	12.1853	10.5164	-0.77111	0.000409686	0.00107243
ERV316A3_21q22.3d	22.7701	22.9112	9.75099	10.1752	0.875099	0.000410454	0.0010738
MER41_9p13.3a	145.276	244.546	144.953	87.2308	-1.19214	0.000412549	0.00107863
HUERSP1_3q27.1	1105.63	1419.15	545.93	199.534	0.643764	0.000416916	0.0010894
HERVE_7p22.1b	12.9642	25.6446	1.80401	3.50495	0.845619	0.000420884	0.00109912
LTR57_18q21.1	30.3185	24.7897	50.3717	26.46	-0.797214	0.000426714	0.00111368
HERVL_8q21.3c	11.1939	21.7487	2.21979	4.884	0.811977	0.000429275	0.00111934
HERVH_4q32.2c	119.397	116.145	163.838	79.5659	-0.710989	0.000429396	0.00111934
HERVL_3q21.2	90.6085	80.4019	40.5277	26.358	0.888347	0.000431041	0.00112296
HML6_19p13.2a	1.01299	4.20439	17.9087	41.4365	-0.889738	0.000435893	0.00113493
MER101_12p13.31b	3170.1	2435.47	1749.31	754.065	0.648665	0.000436621	0.0011351
HERVH_9q21.33b	6.0579	11.8221	17.122	19.7783	-0.899926	0.000436682	0.0011351
HERVL_17q12a	25.4565	29.1388	43.3325	31.4115	-0.997814	0.000436914	0.0011351
MER101_12q13.3	4.38749	7.18661	14.8633	19.5379	-0.826224	0.000436996	0.0011351
ERV316A3_2p23.3a	42.1084	54.6475	13.4838	14.0985	1.06245	0.000440485	0.00114349
MER41_19q13.43b	21.1183	19.3968	10.316	12.4404	0.870351	0.000444496	0.00115322
ERVLB4_17q25.3b	112.621	75.9478	67.2327	52.0157	0.823591	0.000445766	0.00115583
HUERSP2_Yq11.223	13.6938	20.8779	47.0119	43.7321	-1.22914	0.000449084	0.00116374
HERV30_3p12.2	10.7043	30.5608	0.327184	1.58126	0.775227	0.000453228	0.00117379
HERVEA_19p12b	3.85111	10.7019	13.1938	16.0442	-0.85604	0.000454099	0.00117535
LTR25_11q24.3b	13.2728	22.7137	3.12525	6.1927	0.888214	0.000458057	0.00118489
HML2_1q32.2	51.5746	50.8745	133.234	140.359	-1.20038	0.000465153	0.00120254
HML3_6p22.1	270.44	380.298	804.756	891.208	-1.48139	0.000467826	0.00120873
HERV9_Yp11.2a	11.8372	25.0134	1.52523	5.47396	0.843418	0.000480991	0.00124202
ERVLE_8q24.23d	29.4122	96.574	1.08739	2.96882	0.945756	0.000484694	0.00125084
PRIMA41_20q13.33	19.981	56.5346	3.55331	6.97935	0.924663	0.000489148	0.00126159
ERVLE_4q33b	51.5111	285.359	0.660172	2.78196	0.95516	0.000490405	0.00126409
HERVL_7q32.1	29.6088	37.0007	10.9124	14.6968	0.987767	0.000491852	0.00126707
HERVH_3q21.2a	104.3	351.974	8.42348	11.0937	1.2751	0.000492563	0.00126816
MER61_3p26.1	15.3831	19.0891	5.59981	9.16031	0.885562	0.000493938	0.00127096
MER4B_17p11.2a	31.8466	37.0129	53.6347	37.2014	-0.98243	0.000495522	0.00127428
HERVH_2q24.1e	7.28772	10.225	18.4511	16.853	-0.848293	0.000497707	0.00127915
HERVW_Xp11.21	109.531	184.328	47.0653	44.1928	0.986425	0.000498895	0.00128145
LTR57_10p15.1	9.02358	23.9621	1.27165	3.70199	0.771629	0.000500784	0.00128555
MER61_1p34.1b	405.05	373.329	172.371	82.0922	0.811761	0.00050483	0.00129518
HERVL_20q13.12	9.44808	13.6708	2.34958	3.84987	0.767816	0.000510342	0.00130855
HERVH_6p25.2	11.8846	16.0479	3.57466	5.47718	0.800535	0.000511349	0.00131037
HERVL_2q34b	4.42849	8.77376	14.6744	17.9581	-0.824154	0.00051359	0.00131534
HERV9_1p31.3	37.3732	67.1533	68.9984	78.2333	-1.0558	0.00051538	0.00131916
HERVI_11p15.4	3.25891	9.07662	19.623	38.4075	-0.937699	0.00051868	0.00132683
HERVIP10F_Xp21.1	23.6052	31.5224	35.3642	25.928	-0.908895	0.000519202	0.00132725
HERVL_9q21.11a	339.455	1726.91	6.49245	15.5718	1.407	0.000519452	0.00132725
MER61_1p34.1a	17.8384	24.3847	6.31554	9.54151	0.917067	0.000520255	0.00132853
MER4_Xq21.1a	18.0682	23.696	32.2765	28.3005	-0.988202	0.000524301	0.00133808
HUERSP2_3q26.1e	2.78467	7.09527	20.2762	33.9992	-0.967151	0.000524967	0.001339
HERVK11_8p23.1c	266.994	428.456	381.524	286.332	-1.50833	0.000527768	0.00134536
HERVL_7p21.3a	1923.18	1108.48	1139.73	500.001	0.617656	0.000528851	0.00134734
HERVL_6q27e	0.705199	3.63373	9.59259	14.6292	-0.762505	0.000531472	0.00135323
HERVIP10FH_15q25.1	695.003	284.12	918.141	298.813	-0.444986	0.000532041	0.00135389
HERVW_13q21.1	55.453	177.689	0.216577	1.0883	1.00298	0.00053286	0.00135519
MER4_3q13.2b	7.22739	13.669	15.203	13.5981	-0.799493	0.000535596	0.00136136
HARLEQUIN_17q25.3a	184.184	142.977	269.408	185.949	-0.763252	0.000538435	0.00136728
ERVLE_16p11.2a	10.4802	22.5128	2.11446	7.35535	0.815245	0.000538551	0.00136728
MER4_10p12.33	4.76113	10.0522	14.4641	15.0112	-0.8499	0.000540553	0.00137157
HERVH_18q12.2a	54.4933	98.6154	5.40115	7.47766	1.22987	0.000547401	0.00138814
HERVH48_8q12.3	8.75737	15.4553	21.9186	22.4196	-0.971232	0.000552072	0.00139918
HERVH_1q24.2	355.149	679.094	99.0521	180.651	1.35724	0.000555589	0.00140728
HERV9_12q22a	69.8136	297.733	6.27657	13.2918	1.15244	0.000556261	0.00140817
HERVKC4_19q11	11.9145	18.5731	3.07382	5.00481	0.776115	0.000557876	0.00141144
HERVH_3q24d	23.0138	45.31	2.75837	7.07077	1.03943	0.000562228	0.00142163
HML2_19q13.12b	347.826	657.516	392.419	168.628	-0.721299	0.000563089	0.00142298
HERVW_3p22.2	85.7215	272.832	5.47372	8.53532	1.18352	0.000567096	0.00143229
HERVH_2q31.1c	15.5173	20.3633	5.89077	11.5233	0.898217	0.000570001	0.00143879
HERVL18_12q21.31	27.6008	130.605	1.83785	7.9316	0.90794	0.000571785	0.00144246
HARLEQUIN_3q22.2	63.1988	163.278	67.3407	61.762	-1.1702	0.000576555	0.00145366
HERVL74_8q21.2	26.9961	30.0457	42.2539	27.9471	-0.893168	0.0005798	0.00145984
LTR25_Yq11.223e	6.49456	11.8251	23.1078	25.5454	-0.997725	0.000579886	0.00145984
ERV316A3_10p12.2	2.94513	11.2396	12.5221	15.8094	-0.863083	0.000580004	0.00145984
HERVH_3p14.3a	1428.55	4292.68	16.3766	50.102	1.99503	0.000582023	0.00146408
MER4B_17p11.2d	17.3889	60.2549	0	0	0.822643	0.000591193	0.00148629
HERVH_Xq23a	67.9065	341.657	0	0	0.966607	0.000592875	0.00148967
PRIMA41_3q21.3b	34.3189	47.7378	9.16817	10.6282	1.02853	0.000598064	0.0015012
HERVL40_3q12.2	98.8501	174.887	28.1026	26.1112	1.08451	0.000598206	0.0015012
HUERSP2_8q12.3	14.4135	20.0402	4.67963	6.49557	0.818967	0.00059876	0.0015012
HERVH_19q13.2a	130.289	122.757	329.82	333.996	-1.23248	0.000598835	0.0015012
MER61_6q14.1c	13.5547	35.9841	1.9972	5.19463	0.828324	0.00060181	0.00150779
HERVL_4p15.2a	16.5423	16.6864	7.62299	9.94345	0.814716	0.000606139	0.00151777
HERVFRD_3q24	31.3711	64.3786	3.29575	8.38874	1.11302	0.000608043	0.00152167
HML5_9q31.1	14.4974	16.77	5.74867	8.14071	0.808195	0.000609491	0.00152442
HARLEQUIN_18p11.22b	63.7762	83.5766	29.1129	42.9016	1.19843	0.000623709	0.00155909
HERVE_20p11.21b	16613.6	17759.3	20111.6	9050.36	-0.796586	0.000625616	0.00156297
MER4_4q32.1c	26.9455	158.332	0.374896	1.79902	0.757715	0.000629517	0.00157182
MER61_2q32.1b	19.6104	47.0539	27.9416	30.8784	-1.04299	0.000630851	0.00157408
ERVL_1q42.13	10.7338	13.3484	4.26886	7.5381	0.761175	0.000631143	0.00157408
HERVK11_18q21.1	33.3066	70.7948	83.7774	99.7007	-1.29873	0.000634147	0.00158068
HERVH_8p23.2b	11.4718	55.188	0.121136	0.830469	0.712265	0.000639134	0.00159158
HERVH_12p12.2a	9.43818	32.3346	0.744775	3.03402	0.740858	0.000639248	0.00159158
HERVH_Xq13.1b	65.386	61.2769	88.1748	43.2077	-0.726962	0.000640503	0.0015938
MER4_9q21.12	5.1321	7.65009	15.3074	14.6499	-0.797751	0.000645835	0.00160616
LTR57_2q23.3	2303.36	1248.83	3274.09	1508.11	-0.553605	0.00065183	0.00162015
ERVLE_9p13.1a	15.0384	59.5839	0.414616	2.188	0.761405	0.00065244	0.00162059
HERVH_21q21.3b	15.8067	35.2333	3.35468	6.51063	0.858841	0.000652747	0.00162059
HML3_1p36.33	10.409	25.9395	1.6361	4.61367	0.739849	0.000654709	0.00162454
MER4_20p11.21b	22.7079	22.3558	10.7248	12.2831	0.846899	0.000656231	0.00162739
ERVLB4_3p21.31d	25.7453	30.9525	39.3224	31.4966	-0.945363	0.000669922	0.00166041
HERVL18_8q11.23	18.4031	77.0598	0.297028	1.16848	0.777535	0.00067522	0.00167259
MER4_3q12.2	23.584	28.8447	10.5988	12.7297	0.903871	0.000678842	0.00168061
HERVH_4q32.3a	26.7339	97.7771	0.65764	3.40095	0.892518	0.000683314	0.00169073
HERVH_6p25.1	58.9109	182.185	4.38373	12.7459	1.16717	0.000687795	0.00170086
ERVLB4_6q16.1d	618.566	319.08	804.312	268.213	-0.473077	0.000689531	0.00170419
ERVLB4_12q13.13	35.7807	33.0247	15.3224	11.7308	0.842279	0.000692735	0.00171114
HERV9_6q25.1	176.691	120.845	300.047	219.785	-0.7704	0.000694869	0.00171545
ERVLB4_2p25.1b	27.3769	25.857	14.2792	15.7706	0.887378	0.000698974	0.00172461
MER41_4q31.1	147.266	119.366	190.582	72.2237	-0.595567	0.000701956	0.00173099
ERV316A3_6q14.3e	12.5519	39.9388	1.73498	4.49411	0.803959	0.000709427	0.00174843
HERVH_8q22.3a	37.9944	44.9334	54.4587	33.7714	-0.930825	0.00071209	0.00175401
ERVL_2p22.1a	15.3072	20.5837	5.34017	5.72703	0.782689	0.000713268	0.00175592
MER4_5p13.1	1.49388	4.99806	11.7292	18.4069	-0.826871	0.000714563	0.00175812
MER101_20q13.12	9.0808	13.9758	2.55217	5.41954	0.761103	0.000715993	0.00176016
PABLA_6p21.2	12.2166	32.0121	3.47666	8.45017	0.821139	0.000716194	0.00176016
HUERSP3B_1p34.2b	7.66234	12.0092	17.3194	17.6816	-0.794686	0.00071852	0.00176489
MER4_20p13b	3.91487	10.0935	10.0332	10.9472	-0.750132	0.000727528	0.00178564
LTR25_Yq11.223d	24.1962	35.691	80.8263	72.2075	-1.39343	0.000727786	0.00178564
HERVH_5q21.1b	30.7243	89.3036	0.875847	3.04072	0.963048	0.000737615	0.00180875
HERVE_11q13.2a	26.6877	41.2524	6.66303	10.5142	1.01419	0.000739775	0.00181303
HERVL66_17q21.31	360.99	203.695	239.929	94.1743	0.489525	0.000743986	0.00182233
MER4B_Xq11.1a	13.4667	20.7263	21.275	15.8052	-0.847464	0.000746972	0.00182862
ERVLE_7q11.21	75.4989	66.5832	38.8651	40.1022	0.933554	0.000747554	0.00182902
HERVL_6q14.2	18.7737	25.1746	6.52596	12.8148	0.918857	0.000760387	0.00185938
ERVLB4_21q22.3a	17.0678	19.0205	30.2031	19.6403	-0.892806	0.000768501	0.00187818
MER41_Xq11.1c	180.777	271.161	299.64	151.587	-1.48423	0.00077183	0.00188526
HERVH_5q14.3b	16.7245	39.0858	1.45308	3.14167	0.887797	0.000774763	0.00189137
MER4_6q14.2	71.5674	68.6522	106.714	49.6396	-0.824059	0.000786611	0.00191923
HERVH_20q11.23	9.65812	37.7042	0.470474	1.71948	0.699785	0.000788013	0.00192158
MER61_4q31.21b	79.9263	97.7001	108.385	61.6504	-0.808082	0.000791614	0.00192928
ERV316A3_1q44b	7.61205	11.5019	2.83263	6.40558	0.686417	0.000806763	0.00196511
HERVH_4p15.2a	5.86978	16.7724	25.8506	36.5659	-1.03566	0.00081285	0.00197884
HML1_19p12e	10.2295	14.7932	18.443	14.8941	-0.801269	0.000818636	0.00199124
ERVLE_2q35a	43.7262	55.2523	15.8913	18.2262	0.922322	0.000818854	0.00199124
HERVP71A_1p31.1b	7.59846	15.5101	16.8125	15.315	-0.868567	0.000821567	0.00199673
HML3_19p12f	11.5793	29.0839	1.46933	3.70784	0.761038	0.000828855	0.00201333
HERV3_3q21.3	1591.8	7932.92	197.887	143.82	0.928917	0.000836411	0.00203056
ERVL_Xp11.21b	4.14498	7.13847	11.5596	11.9514	-0.723017	0.000840947	0.00204044
HML3_19p13.2c	233.665	122.657	335.979	139.048	-0.575701	0.000841867	0.00204154
ERVLE_6q27d	21.4862	19.4925	9.65598	9.85225	0.817892	0.000842872	0.00204285
HERVH48_7q33	22.4861	118.149	0.172736	1.18422	0.795897	0.000847004	0.00205173
HERVK14C_15q21.1	29.0242	42.3864	59.705	50.2118	-1.17498	0.000869352	0.0021047
ERVLE_2p22.1b	33.7777	25.1017	53.6807	27.9551	-0.693433	0.000877065	0.0021222
HERVL_11q12.2	32.5603	35.3951	73.2031	60.0004	-1.04555	0.000881542	0.00213185
HERVL_6q22.31a	20.4997	85.6584	0	0	0.772802	0.00088532	0.00213981
HERVH_1p35.1	29.2331	139.342	0.26598	1.28873	0.87517	0.000886723	0.00214111
MER61_17p13.1	16.6478	18.2117	33.3637	30.3125	-0.877797	0.000886835	0.00214111
LTR23_1q41	12.1931	23.8557	2.23717	4.90608	0.808731	0.000892621	0.00215389
HARLEQUIN_17q21.33	9.08783	11.9088	3.68904	8.82999	0.750082	0.000896451	0.00216194
PABLA_2q32.2b	54.5743	48.8937	26.0616	18.4993	0.814361	0.000898995	0.00216688
HARLEQUIN_4p14b	15.094	21.3964	31.3201	30.8108	-0.960626	0.00090116	0.00217091
HERVL18_4p15.2b	81.79	63.8273	115.881	51.7823	-0.680493	0.000904651	0.00217812
HERVL74_16q24.3	995.056	821.316	1265.05	500.496	-0.494759	0.0009068	0.0021821
ERVLE_9p21.3a	4.38086	7.76869	13.0893	11.9039	-0.777616	0.000909939	0.00218813
ERVLB4_8p23.1e	18.4736	39.7219	3.75575	9.5749	0.899836	0.00091065	0.00218813
LTR25_12p11.22a	4.45371	9.59865	12.1015	16.186	-0.733553	0.000910804	0.00218813
HERVL40_1p32.3	21.1259	17.8297	10.6607	12.9674	0.833699	0.000913752	0.00219401
ERV316A3_2q32.2b	53.5736	127.015	7.29345	10.5417	1.14752	0.000917215	0.00220111
HERVH_10q24.1	78.7462	424.568	0.584858	2.47803	1.03142	0.00092185	0.00221103
HML5_19q11	592.799	367.994	300.393	98.5271	0.672664	0.000924696	0.00221664
HERVL_2q36.1a	57.7613	78.7509	158.787	209.062	-1.31037	0.00093866	0.00224888
PABLB_4p15.2	9.15736	13.0065	21.219	23.748	-0.855081	0.000943045	0.00225758
HERVH_14q23.1b	8.69559	13.75	2.45127	6.02294	0.77216	0.000943319	0.00225758
HERVW_6q23.3a	11.119	27.8534	42.0372	75.3667	-1.1468	0.000950946	0.00227459
HERVL_18q12.2a	12.2792	33.4123	0.839097	2.91971	0.786674	0.000958005	0.00229022
HERVH_7q34d	13.9848	16.3056	5.39451	8.39465	0.779723	0.000972026	0.00232247
HERVL_4q32.1e	11.9532	28.9252	1.66436	3.97466	0.789114	0.000974369	0.0023268
MER61_1q42.12	83.0898	81.3232	117.634	57.6683	-0.785715	0.000990895	0.00236498
HERVH_10p14b	14.7401	57.2699	0.6087	2.60892	0.751943	0.0009925	0.00236752
ERV316A3_2q35e	66.6432	49.1467	99.5083	52.3517	-0.776871	0.000996656	0.00237614
ERV316A3_Xq23b	5.31102	8.75408	13.948	13.0419	-0.769512	0.00100219	0.00238805
HERVW_7q21.2	135.229	141.638	188.393	96.175	-0.874118	0.00100709	0.00239692
ERV316A3_16q22.2	17.1442	19.9495	6.13218	7.7789	0.848217	0.00100751	0.00239692
HERVH_1q42.13d	139.722	954.091	18.861	27.8009	-1.06075	0.00100756	0.00239692
HML5_18q21.2	445.992	1359.21	24.6869	42.8964	1.57048	0.00100928	0.00239971
MER4_4q31.3b	9.53991	11.4658	3.93764	6.34782	0.706498	0.00101192	0.00240452
ERVLB4_17q22c	3887.43	2288.31	2497.38	936.162	0.49488	0.0010124	0.00240452
MER101_6q22.32a	23.1408	37.5724	7.62227	8.70712	0.850245	0.00103287	0.00245142
HML6_2q21.3	9.13836	15.6641	2.11005	4.18122	0.738735	0.00103327	0.00245142
HERVL_Xq21.33h	10.9786	31.4249	0.355882	2.4398	0.738684	0.00103683	0.00245855
HERVL74_Xq13.2b	3.88532	6.32024	10.6112	9.94965	-0.695691	0.00104806	0.00248261
HERVE_11q13.4b	11.8822	31.4189	1.37449	3.93082	0.797812	0.00104811	0.00248261
HERVH_6q21a	12.5517	23.696	2.19325	5.79285	0.843996	0.00105376	0.00249464
LTR19_19p13.2b	91.0109	75.1678	137.394	69.6967	-0.788582	0.00105634	0.00249941
ERVLB4_19q13.12	438.959	412.296	236.329	118.298	0.646439	0.0010583	0.00250269
ERVLB4_3q13.13	18.238	20.9504	35.5371	32.4594	-0.854887	0.00106013	0.00250535
HERVH_3q25.2c	9.89719	26.2927	0.526182	1.80948	0.732747	0.00106057	0.00250535
MER101_3p12.3	59.9803	54.022	90.0826	54.7303	-0.887526	0.00108051	0.00255107
ERVLB4_7q36.3a	83.0868	88.7394	37.3265	27.304	0.826905	0.00108802	0.00256741
HML2_14q11.2	96.3561	128.78	41.3418	28.3184	0.88782	0.00109324	0.00257836
HERVH_20q12b	47.7462	283.566	1.65166	4.5297	0.852961	0.0010968	0.00258536
MER41_6q22.31b	14.8979	18.0991	33.3514	37.9264	-0.914214	0.0010999	0.00259127
HERVW_11q14.1	156.809	130.606	208.623	89.8156	-0.594749	0.00111644	0.00262882
HML5_12q23.1	1605.02	1543.94	2072.93	1021.1	-0.715574	0.00111716	0.00262911
ERVLE_8q22.3c	206.837	109.27	134.905	52.2159	0.519445	0.00113061	0.00265932
HERVFRD_10p15.1a	36.5017	44.1352	13.3042	15.9119	0.965715	0.00113558	0.00266958
HERV3_11q14.1	40.1329	99.9688	13.5949	13.2225	0.880191	0.0011366	0.00267055
HML3_4q13.3b	41.8578	156.612	38.1321	27.6246	-0.909504	0.00114173	0.00268116
HERVFH21_3q23	3.37394	11.4749	12.508	17.3035	-0.827814	0.00115594	0.0027131
HERVFH21_8q21.11	8.9771	12.417	3.15659	4.99377	0.688728	0.00115779	0.00271597
HERVH_19q13.41a	687.572	651.646	383.241	195.106	0.619756	0.00117234	0.00274744
ERV316A3_3q29	32.262	45.3097	49.477	33.8187	-0.837235	0.00117246	0.00274744
ERVLE_5q22.2b	7.68021	12.0569	2.37785	4.6174	0.681465	0.00117562	0.00275339
HML2_8p23.1d	146.7	166.619	245.141	184.742	-1.30348	0.00118195	0.00276672
MER4_6q14.3b	7.90125	19.8429	2.17481	5.39199	0.69082	0.00118953	0.00278297
HERVL74_19q13.11b	39.6849	31.9896	60.2059	35.956	-0.748315	0.00120296	0.00281291
HERVFRD_7p21.3	26.7439	39.0304	8.35919	12.5422	0.922675	0.00120723	0.00282137
HERVE_19q13.41	112.075	85.8644	60.8573	33.7161	0.702258	0.00121171	0.00283033
MER4_5p12a	169.524	305.09	36.7078	25.4263	1.12693	0.00121729	0.00284185
ERVLB4_12q13.12a	26.4082	39.0271	8.45054	13.5716	0.925246	0.00121989	0.00284642
HERVFH19_7q32.2	11.7726	23.7533	15.4559	97.2421	0.870374	0.00122155	0.00284878
HERVS71_3q12.3	116.873	127.957	55.7786	31.8389	0.76041	0.00123136	0.00287011
MER4_5p12b	105.103	127.692	38.8499	22.8319	0.862115	0.00123775	0.00288349
ERV316A3_11p15.5a	20.1166	83.3574	0.15011	1.0291	0.774432	0.00123853	0.00288375
HERVI_14q11.2	24.6173	106.373	0	0	0.757177	0.00124001	0.00288568
ERVLE_Xp11.4b	18.5434	67.9488	20.6412	21.0243	-0.975969	0.00125285	0.00291402
MER41_Xq13.3a	15.6518	60.4879	2.08857	5.35503	0.768422	0.00125388	0.00291486
ERVLE_6q22.31g	11.869	14.5658	4.36266	6.8357	0.737663	0.00126324	0.002932
PRIMA4_4p16.3	293.664	157.617	204.256	65.1108	0.43229	0.00126324	0.002932
ERVLB4_1q25.1c	26.3307	22.1714	46.9089	34.196	-0.819994	0.00126326	0.002932
HERVH_3q28a	370.983	866.276	348.235	276.133	-1.18911	0.00127402	0.0029554
ERVLB4_Xp21.1e	28.8043	35.0888	41.8369	26.3853	-0.888707	0.00127703	0.00296083
ERVLE_20p12.2b	11.8454	15.4344	4.86923	7.92059	0.736889	0.00127822	0.00296201
ERVLE_12q13.12	17.1926	14.0069	34.9124	28.5528	-0.772701	0.0012794	0.00296319
MER41_14q32.12	94.5129	65.3228	52.5378	30.0193	0.69416	0.00128124	0.00296586
ERVLB4_10q11.22a	66.1998	132.351	85.2406	84.7285	-1.49161	0.00129078	0.00298639
ERV316A3_4q21.1m	18.6248	52.0157	3.81031	6.53857	0.818647	0.00129719	0.00299963
HERVIP10FH_1q25.1	9.97759	13.5918	3.39605	5.50204	0.720318	0.00129813	0.00300021
HML6_Xq13.2	6.87461	11.8993	15.6267	17.3663	-0.760401	0.00131046	0.00302711
HUERSP3_1q23.3	15.7862	54.6915	1.52328	3.39626	0.741613	0.00132181	0.00305172
HERVL66_19p12g	6.656	14.3661	17.618	18.0131	-0.826515	0.00132606	0.00305992
HARLEQUIN_6p21.33	1251.58	1506.3	1536.85	1000.06	-1.16668	0.00133266	0.00307352
MER4B_15q21.2	5.16561	9.37363	13.2104	14.5177	-0.764763	0.00133629	0.00308028
LTR25_11q13.4	12.9548	33.8843	0.979103	2.95055	0.771332	0.00133806	0.00308275
HERVW_7p14.1	13.5878	55.4663	0.919211	2.83587	0.712279	0.00133903	0.00308336
ERVLE_17q11.1	14.1744	47.6467	0	0	0.717397	0.00134065	0.00308547
ERV316A3_Xq26.1	771.223	482.734	482.261	171.719	0.503921	0.00134341	0.00309019
ERVLE_6p21.2a	4.43263	7.20323	14.4925	19.1765	-0.74884	0.00136198	0.00313071
ERV316A3_5q23.1h	11.5655	33.6454	0.662975	2.62122	0.767955	0.00136245	0.00313071
MER101_Xp22.13	6.24473	9.44432	16.3744	17.384	-0.775778	0.0013705	0.00314755
HERVIP10F_1p36.33	101.931	155.548	31.2304	38.5163	1.0688	0.00137318	0.00315205
HERVH_2p24.3c	19.0445	62.1891	1.3232	4.01843	0.8388	0.00137678	0.00315866
HERV30_4q13.2c	2.19016	10.5425	10.0133	14.4529	-0.748509	0.00137755	0.00315879
HERVL74_19q13.41a	95.6138	99.5273	151.562	132.691	-0.908442	0.00137848	0.00315927
HML5_8p21.2	62.1226	221.358	8.10349	22.3752	1.05776	0.0013828	0.00316749
ERV316A3_11q13.2	11.4006	38.8585	0.388256	2.18582	0.740447	0.00138444	0.0031696
MER4_6q26d	13.7463	32.2231	1.9264	4.46599	0.783583	0.00139664	0.00319586
HERVFRD_20q11.23b	105.535	81.1954	60.9303	32.7638	0.640668	0.00141699	0.00324075
HERVH_1p13.1a	114.433	767.282	0.0772334	0.529485	0.750563	0.00142051	0.00324692
MER41_19q13.2c	23.1538	23.901	10.7861	11.5557	0.797592	0.00142118	0.00324692
ERVLE_4q23d	20.9524	48.5808	2.90452	5.5579	0.884848	0.00143186	0.00326963
ERVL_3q26.32	10.2825	14.2943	4.06077	7.46561	0.752418	0.00144077	0.00328825
ERVLE_7p22.2a	10.7324	15.1781	3.58218	6.68696	0.764358	0.00144835	0.00330384
ERVLB4_7p12.1f	10.0916	16.5005	2.2634	4.81178	0.758056	0.00146053	0.00332988
HERVFC1_7q36.2	1503.26	10123	3.0522	8.58478	1.13527	0.00146766	0.00334441
HERVH_2p14b	1362.76	2071.32	429.351	207.591	0.869758	0.00146865	0.00334492
PABLB_Xp21.1b	10.9539	17.7497	20.2251	20.1788	-0.819724	0.00149264	0.0033978
ERVLE_2q24.2a	18.7661	20.7849	8.74351	14.0906	0.868674	0.00149724	0.00340649
ERVLE_14q32.32c	10.943	25.8306	2.93657	5.14866	0.723053	0.00149821	0.00340694
HUERSP2_5p13.2	23.8173	126.199	0	0	0.719651	0.00150793	0.00342725
HERVIP10FH_10p11.23	55.59	38.7284	78.0076	33.481	-0.592879	0.00152195	0.00345733
HML3_1q25.2	78.1024	81.1015	65.5971	142.407	1.17891	0.00152629	0.00346539
ERV316A3_13q31.1f	18.7154	99.6848	0.128323	0.879739	0.721566	0.00156201	0.00354464
HERV3_21q22.13	448.206	649.047	132.482	93.4419	0.967189	0.00158268	0.0035897
ERVLB4_Xq26.3y	98.1004	93.0703	138.009	71.8218	-0.693715	0.00158601	0.00359535
MER41_5q23.1b	6.61762	12.9792	13.4345	11.9048	-0.737751	0.00158681	0.00359535
HERVH_8q23.3f	28.6995	90.6297	1.10067	6.74856	0.927526	0.00159654	0.00361552
MER4_8q12.1a	3.50575	14.427	10.138	14.007	-0.754115	0.0016167	0.00365928
HERVL_10p13c	45.9875	40.8617	23.9038	19.1102	0.790636	0.00162275	0.00367108
MER4_19p12a	86.0285	129.087	90.4454	54.8827	-0.94209	0.00162482	0.00367388
MER61_5p12a	10.9547	47.8839	0.911351	3.94074	0.663268	0.00165275	0.00373509
LTR25_19q13.11	249.547	171.195	157.876	62.7881	0.538454	0.00167106	0.00377453
MER34B_Xq24	14.1028	11.3113	27.0466	18.7709	-0.68543	0.00167796	0.00378816
ERV316A3_5q35.2b	64.7114	105.428	22.4081	26.7006	1.09504	0.00168294	0.00379744
MER4B_5q13.3	3.20826	6.93134	11.5301	13.5689	-0.720557	0.00168638	0.00380324
ERV316A3_9q31.3	29.473	51.2236	4.59056	6.66087	0.968865	0.00169603	0.00382304
PRIMA41_7p14.1a	2.79133	6.26707	9.3003	11.3361	-0.660861	0.00169823	0.00382598
ERV316A3_22q13.33b	59.9359	92.9056	17.0716	26.7571	1.1954	0.00169908	0.00382598
HERVS71_3q22.1	8.98112	13.2018	3.33274	7.41393	0.695227	0.00170228	0.00382987
ERV316A3_6p22.1l	19.6977	49.3075	50.745	95.1981	-1.00797	0.00170255	0.00382987
ERVLE_5q31.1b	25.3885	34.745	44.8462	35.6029	-0.85823	0.00171782	0.00386223
MER61_5q23.2a	26.9016	122.047	2.15286	11.79	0.827147	0.00173152	0.00389104
ERV316A3_2p24.3b	632.814	1250.67	6.3766	13.16	1.72957	0.00173936	0.00390664
ERVLE_1q44a	7.3098	9.95376	15.2731	13.0887	-0.727856	0.00174109	0.00390852
HML1_1q23.3	12.7927	40.6415	1.56065	3.58399	0.720813	0.00175796	0.0039424
HERVH_6p21.2b	40.7862	77.2065	53.2039	55.2896	-1.04848	0.00175798	0.0039424
MER4_11q12.1e	10.7512	14.4514	22.2404	23.7834	-0.793271	0.0017646	0.00395523
HERVH_9q21.32b	1.38712	5.1624	24.6605	53.3478	-0.874377	0.00176981	0.00396489
HML1_Yq11.21b	398.546	2084.59	260.224	254.902	-1.28428	0.00178626	0.00399969
HERVL_12p12.1c	3.51065	8.10566	12.0467	14.8085	-0.761161	0.00180331	0.00403581
ERV316A3_15q21.2a	140.297	209.902	160.77	52.7582	-0.602514	0.00180531	0.00403821
HERVE_2p14a	36.6581	74.5196	22.4228	60.5584	1.03678	0.0018223	0.00407413
HERVH_16q21e	17.6184	53.6078	0.496033	1.9579	0.790488	0.00182366	0.0040751
HERVL18_9p24.1	99.9471	69.0359	55.9503	38.9864	0.727877	0.00182946	0.00408599
HERVL18_2q32.1	25.674	22.8257	13.1834	14.0676	0.756921	0.00184195	0.00411053
ERVLE_8q11.23b	575.407	391.343	362.916	106.146	0.457931	0.00184233	0.00411053
ERVLB4_3q26.31a	23.9247	60.3335	3.38003	5.61672	0.841346	0.00185563	0.00413811
ERVL_13q21.1b	2.85801	5.89824	10.0538	11.4223	-0.699878	0.00186846	0.00416459
ERVLE_5q35.3b	8.90713	18.483	1.65026	4.81376	0.701641	0.00188312	0.00419513
HERVH_6p21.1	91.1115	173.54	95.9344	58.5866	-0.918924	0.00189716	0.00422428
ERVLE_8p11.22b	9.96114	22.1712	3.34851	6.68127	0.693919	0.00190425	0.00423789
ERV316A3_12q23.2a	4.66218	6.68936	11.9297	11.6208	-0.641332	0.00190625	0.0042402
HERVI_12p13.31	547.207	3183.06	3.29765	6.94247	1.19515	0.00190942	0.00424509
HERVH_10p15.3a	9.34197	18.3003	1.58363	3.59149	0.687668	0.00193472	0.00429916
HERVIP10FH_14q23.1	324.266	711.354	331.672	150.626	-0.690591	0.00194981	0.0043305
ERVLE_8q22.2b	8.23283	12.9837	3.22546	9.01505	0.710749	0.00195472	0.00433919
HERV9_15q21.1a	12.752	17.7247	3.63591	6.05958	0.773321	0.00195663	0.00434123
LTR25_6q21	29.6034	31.9585	50.5571	43.6215	-0.888744	0.0019711	0.00437039
ERVLB4_Xp21.1d	7.46404	16.3142	13.6626	13.359	-0.740163	0.00197176	0.00437039
ERVLE_3q13.2b	12.3836	13.5169	5.53218	7.0729	0.710314	0.00198734	0.00440269
ERV316A3_12p13.33	67.7594	49.1241	38.7138	27.2516	0.716388	0.00198977	0.00440585
MER61_13q21.33	16.8466	56.0371	0	0	0.766219	0.00200619	0.00443997
HERVW_1q25.2	8.07112	14.2009	15.8879	16.4175	-0.778518	0.00201827	0.00446444
HERVFRD_7p13	6.15828	7.08745	19.6153	22.3525	-0.767668	0.00203405	0.00449708
ERV316A3_18q11.2c	480.092	617.601	193.561	160.922	1.14482	0.00204166	0.00451162
ERVLE_5q13.2a	46.0841	38.2628	62.2667	29.3031	-0.646545	0.0020463	0.0045196
HERVIP10FH_6q12	9.88607	27.3746	1.07384	3.53607	0.694293	0.00206372	0.00455579
HERVH_2p13.3b	22.8959	71.146	1.90026	6.93836	0.822958	0.00210927	0.00465399
HUERSP3_2q14.2	10.2071	14.2515	4.6253	9.54829	0.719745	0.00211275	0.00465932
HERVH_18q12.2c	17.5126	39.5365	3.51332	6.41557	0.783634	0.00211542	0.00466285
HERVH_Xp21.3b	140.194	868.715	0.117489	0.805462	0.883855	0.0021276	0.00468735
ERVLE_3q22.3b	8.04526	10.1397	3.49819	6.17735	0.634388	0.00213845	0.00470889
HARLEQUIN_17q21.31	3613.06	1849.7	2617.86	766.097	0.383945	0.00214834	0.00472829
HERVH_4q31.3c	8.79101	18.8955	2.02612	5.58995	0.692894	0.00215764	0.00474636
HERVL_12q13.12	590.562	328.551	404.56	147.249	0.464396	0.00216013	0.00474946
HERVH_10p12.1c	30.2642	64.933	5.24308	7.3232	0.920413	0.00216413	0.00475587
HERVIP10F_22q11.1	13.6986	64.6346	0	0	0.648803	0.00216992	0.00476621
ERV316A3_2q22.3a	8.66804	38.1983	11.6249	12.3346	-0.732224	0.00217309	0.00477079
HERVH_12p13.31e	65.5183	162.784	6.46249	11.6571	1.1191	0.00217997	0.0047835
MER61_10q21.3	225.205	200.181	73.4414	54.1839	1.0529	0.00219446	0.00481288
ERV316A3_6q24.1a	5258.36	3035.66	3626.57	966.708	0.396463	0.00219957	0.00481994
[truncated: 2,383 more rows]
