# Supplementary material for: Transcriptome Analysis of Human Endogenous Retroviruses at Locus-Specific Resolution in Non-Small Cell Lung Cancer
Source: Cancers (Basel). 2022 Sep 13;14(18):4433. doi: 10.3390/cancers14184433 (PMC9497127; doi:10.3390/cancers14184433)
Supplement: Supplementary file 1 [file cancers-14-04433-s001.zip › File_S5.xlsx]

## Sheet: LUAD
HERV	Avg_advance	SD_advance	Avg_early	SD_early	logFC	P.Value	adj.P.Val
HERVEA_12p13.31	260.49	198.911	515.695	527.876	-0.891943	5.09513e-08	0.000217409
HERV9_12q14.1	15.4403	116.867	0.263546	1.85212	0.657842	1.5611e-07	0.000329938
HML3_1q25.2	75.1029	113.168	153.027	171.54	-1.20027	2.3197e-07	0.000329938
HERVW_17q12a	18.2237	26.7216	40.1576	39.2761	-0.908656	4.93164e-07	0.000526082
HML5_12q24.32	33.9055	131.602	8.615	71.5581	0.930756	8.63735e-07	0.000563725
ERVLE_14q32.2a	28.5573	135.593	2.52093	8.00322	0.829717	9.55645e-07	0.000563725
HERVP71A_12p13.31b	698.62	390.036	494.528	387.807	0.540321	1.23709e-06	0.000563725
HUERSP2_19q13.2	467.249	346.021	686.496	522.69	-0.71629	1.25996e-06	0.000563725
HERVH_12q13.2b	90.6173	79.1108	150.481	107.119	-0.792105	1.32444e-06	0.000563725
HERVL_12q14.1a	11.135	79.87	0.417693	3.71014	0.582251	1.40717e-06	0.000563725
ERVLE_4q33b	20.8786	99.9086	1.05166	4.89274	0.732367	1.45324e-06	0.000563725
MER4_6q26c	10.2202	53.5443	1.07924	5.78861	0.623595	1.6913e-06	0.000589269
HERVIP10FH_2p14	25.375	24.9994	44.3165	32.6767	-0.766967	1.79529e-06	0.000589269
HERVIP10F_7q33b	12.801	29.354	21.0437	210.443	0.819391	2.56949e-06	0.000712655
ERVLE_2p13.2a	177.574	129.262	271.132	212.602	-0.646153	2.58353e-06	0.000712655
HERVH_12p13.31c	10.647	43.3482	1.97953	7.5228	0.652343	2.67225e-06	0.000712655
HERVL_3p22.3a	11.3658	25.461	5.24228	25.2334	0.742073	2.91599e-06	0.000731914
HERVIP10F_22q13.2	37526.5	28683.4	24479.3	19293.2	0.547286	3.908e-06	0.000863474
HML2_19q13.12b	338.96	424.008	440.998	257.61	-0.635267	4.22718e-06	0.000863474
MER4_6q26d	81.7038	363.325	4.80924	24.4319	0.938945	4.3316e-06	0.000863474
PABLA_11q12.1b	595.004	373.687	408.501	246.586	0.483143	4.42756e-06	0.000863474
ERV316A3_8q13.3a	3414.14	2247.61	2355.66	1953.47	0.567602	4.72529e-06	0.000863474
MER41_13q34a	12.6907	54.4998	3.19181	7.95686	0.682728	4.85586e-06	0.000863474
MER101_7q36.1a	13834.3	7460.71	9769.71	4222.19	0.423137	4.85666e-06	0.000863474
HUERSP2_12p13.31	101.854	262.768	132.139	108.42	-0.781716	5.46294e-06	0.000932414
HERV30_8q23.1a	49.0849	477.082	0.240693	1.42977	0.579784	6.05842e-06	0.00099428
HML5_12q23.1	2333.31	1710.07	3128.06	1628.85	-0.579775	7.57786e-06	0.00119758
HERVIP10F_2p12	28.3521	95.2556	8.22791	22.0658	0.872329	8.0219e-06	0.00122248
ERVLE_1q23.1a	107.624	220.533	39.0686	116.735	1.23198	8.61927e-06	0.00126822
MER101_11p12a	21.9055	95.6209	1.82569	9.09331	0.700763	9.21712e-06	0.00131098
HERVH_6q22.31h	27.1035	184.575	2.25511	7.26847	0.664039	1.10027e-05	0.00143679
HERVL_3q26.1e	8.96704	20.3225	3.78455	12.4769	0.660428	1.10379e-05	0.00143679
ERVLB4_11p15.5c	344.625	420.041	510.061	395.456	-0.709438	1.11118e-05	0.00143679
HERVH_6q22.31c	8.62629	35.529	2.82205	16.8515	0.601061	1.25479e-05	0.00156565
ERV316A3_6q26c	15.8685	115.158	0.953751	4.45727	0.563289	1.31721e-05	0.00156565
HML6_19p12e	1267.64	1730.43	1921.77	1833.74	-0.907842	1.32091e-05	0.00156565
HUERSP2_Xp11.4	8.25555	12.7924	4.54484	11.8818	0.636085	1.43356e-05	0.00165324
LTR46_9q22.33	7.60776	14.4098	3.44922	8.21584	0.598887	1.50902e-05	0.00169448
ERVL_7p12.1a	55.7756	52.4542	32.9989	45.2898	0.838307	1.64325e-05	0.00179789
ERV316A3_8q24.22b	21.8319	216.377	0.128757	1.49602	0.488176	1.73528e-05	0.00181888
ERV316A3_17q12d	144.949	100.231	218.006	140.982	-0.577944	1.76841e-05	0.00181888
HUERSP1_2q21.2	11.6983	36.5439	3.13546	11.913	0.642551	1.80349e-05	0.00181888
ERVLE_13q22.1b	20.1456	28.1457	47.2182	54.434	-0.86214	1.83294e-05	0.00181888
HERVH48_8q24.23	17.49	80.3173	1.75159	8.63093	0.616526	1.90848e-05	0.0018303
HERVIP10FH_14q23.1	252.538	247.404	363.694	276.071	-0.582229	1.9471e-05	0.0018303
HERVL_10p13a	18.9767	91.1535	25.0827	280.855	0.702033	1.97313e-05	0.0018303
HERVH_13q14.11a	10.5112	19.1148	4.84882	10.522	0.661898	2.04611e-05	0.00184529
HARLEQUIN_5p12a	13.9449	21.6363	25.3501	22.5182	-0.680777	2.07579e-05	0.00184529
HERVEA_5q22.2	1029.08	1571.59	1533.69	1511.58	-0.996737	2.1791e-05	0.00189759
HERVIP10FH_18q12.1	23.4363	75.258	3.87761	20.2021	0.752618	2.57282e-05	0.00219565
HERV9_9q21.33	19.3339	61.0163	7.08549	15.2144	0.704644	2.99068e-05	0.0025022
HERVIP10FH_6q12	14.7911	110.947	1.46839	10.5529	0.529216	3.16936e-05	0.00251015
PABLA_7q31.31	8.22822	35.0289	2.85712	17.812	0.589701	3.18219e-05	0.00251015
HERVIP10FH_4p13	453.593	2247.88	82.6584	437.019	1.26552	3.23333e-05	0.00251015
ERV316A3_12q21.32c	21.9475	159.485	0.527869	2.38273	0.53559	3.23548e-05	0.00251015
HERVL74_17q12	1482.94	1172.99	2198.29	1489.42	-0.577901	3.42477e-05	0.00260955
MER101_20q13.13	47.0341	31.1951	70.4889	75.3348	-0.50575	3.83823e-05	0.00287329
HERVL_11q14.1e	14.0421	65.2067	3.49262	16.9044	0.613962	3.99378e-05	0.00293818
ERVLE_14q32.32a	22.7411	86.3596	5.34852	13.4768	0.707653	4.18763e-05	0.00297559
HERVW_1p33c	27.6873	84.7926	63.0841	108.914	-0.961341	4.22439e-05	0.00297559
HML5_Yq11.23a	15.9565	102.775	1.59629	9.43162	0.59483	4.25383e-05	0.00297559
ERVLB4_22q11.1b	25.9785	60.1739	8.39558	17.3724	0.780419	4.50018e-05	0.00306552
HUERSP3_10q21.1	10.3953	32.495	4.9424	23.1533	0.64201	4.52608e-05	0.00306552
HERVH_2q33.2	26.6915	34.3853	46.1928	42.0392	-0.789002	4.66787e-05	0.00306776
HERVL_Xq21.31c	16.3993	64.8603	3.1936	14.4221	0.643187	4.71466e-05	0.00306776
HERVE_4q33	9.12693	21.469	5.77552	17.5498	0.577741	4.74507e-05	0.00306776
MER41_3q13.31b	152.436	99.0167	116.748	89.0394	0.519221	5.00703e-05	0.00318881
HERVH48_7q22.1	799.084	3191.76	209.965	723.455	1.31178	5.25346e-05	0.00320407
HERVIP10F_12p13.2	171.428	205.772	266.837	259.964	-0.629942	5.26443e-05	0.00320407
ERVLE_12p11.21b	63.4115	46.9902	88.6805	56.6336	-0.563593	5.33822e-05	0.00320407
HERVH_15q14b	41.8949	314.359	1.00074	5.75788	0.582568	5.36101e-05	0.00320407
ERVLB4_1p34.2b	15.4099	35.081	6.58683	15.3665	0.674407	5.40644e-05	0.00320407
ERVLB4_Xq21.33f	46.8363	195.845	7.6646	52.3703	0.776033	5.52152e-05	0.00322744
ERVLE_12q22	8.87106	13.8707	5.39498	11.1855	0.596982	5.79586e-05	0.00328777
HERVH_6q23.2c	260.693	456.297	511.48	775.739	-1.3247	5.8171e-05	0.00328777
HERVL_12q14.1b	19.7048	93.1906	1.85362	5.8474	0.615315	5.87709e-05	0.00328777
HERVL_9p24.1b	132.81	830.518	22.4818	116.003	0.945711	5.95173e-05	0.00328777
HERVH_6q23.2b	151.7	313.767	264.378	395.836	-1.13077	6.00998e-05	0.00328777
MER41_6p23	55.9939	56.9072	36.4423	35.8603	0.662034	7.48435e-05	0.00404249
HERVL40_7q21.11	10.551	40.6745	2.59463	8.56125	0.572771	8.37997e-05	0.00445059
HERVL_8q12.3c	11.4099	108.571	0.651877	3.51275	0.416553	8.44873e-05	0.00445059
HERVK14C_Yp11.2a	25.994	102.091	4.59761	20.1173	0.734799	8.55282e-05	0.00445059
MER4_9p13.3d	26.2823	26.98	39.4687	30.4845	-0.645853	8.73231e-05	0.00448925
LTR25_Yq11.221b	8.8443	37.8834	4.57452	35.7602	0.568039	8.93297e-05	0.00453774
HERVL40_3q13.13b	12.1778	70.8793	1.74457	10.3062	0.52209	9.04207e-05	0.00453912
HERVL_22p11.2	10.68	56.7941	1.4189	5.92273	0.520257	9.18295e-05	0.00455624
HERVH_6q16.1b	19.0369	63.1661	5.58234	25.6696	0.682006	9.52958e-05	0.00467388
HML5_12q12b	16.6375	18.7556	10.0109	11.5424	0.599696	9.98287e-05	0.00484056
HERV9_11q22.3	294.762	980.623	74.2158	291.808	1.03418	0.000101765	0.00487902
HERVL18_12p11.22	12.1017	43.7939	4.3639	13.3094	0.602987	0.000103923	0.00490057
HERVH_6p25.1	12.0062	67.6338	1.37238	4.58304	0.505469	0.000104512	0.00490057
ERV316A3_4p16.1f	8.26827	15.116	3.9802	8.10469	0.546815	0.000108079	0.00491738
HERVIP10FH_Xq24	219.523	815.57	239.867	337.195	-1.02091	0.000108683	0.00491738
HML3_16p13.3	551.283	453.919	780.776	634.083	-0.525164	0.000109181	0.00491738
ERVLE_13q21.32b	24.8847	253.712	0.179446	1.25337	0.432085	0.000110078	0.00491738
HERVH_13q21.1a	10.3397	73.1716	1.2228	4.63404	0.507486	0.000110632	0.00491738
PABLA_17q22	7.2562	17.7408	4.28898	13.1933	0.555368	0.000113196	0.00497946
HERVH_11p11.12	14.3859	81.7045	2.18093	7.93354	0.574802	0.000116158	0.00503625
ERV316A3_10p11.21a	7.86072	11.7003	4.36847	8.27929	0.519731	0.000116848	0.00503625
HARLEQUIN_9q21.33	32.5963	305.69	0.492138	1.96674	0.486232	0.000119597	0.0051032
HERVL74_10p11.22	643.194	715.129	367.32	274.843	0.575554	0.000122223	0.00516364
PRIMA41_4q13.3	6564.14	6488.12	4201.17	3795.54	0.491798	0.000124563	0.00521089
HERVH_3q13.31a	62.2011	241.688	19.638	61.4582	0.9127	0.000130113	0.00539022
ERV316A3_5q23.1h	16.029	94.9705	2.18839	6.76845	0.558261	0.000132168	0.00541566
ERVLE_2p14b	81.1899	139.651	110.066	111.166	-0.793358	0.000133272	0.00541566
HERVH_2p12g	50.3114	508.832	0.44064	2.17875	0.47607	0.000135733	0.00541566
HERVEA_Yq11.221a	44.8036	441.878	0.913984	4.2211	0.502676	0.000135804	0.00541566
HUERSP3_2q14.1	7.58397	22.8	3.22139	11.6803	0.529619	0.000138064	0.00545481
HERVH_4q34.3d	17.4328	154.545	0.261875	1.78723	0.454636	0.000139658	0.00546716
HARLEQUIN_8p21.2	9.23173	20.2667	4.29697	9.78105	0.535975	0.000141432	0.00548628
HUERSP3B_19q13.2	12.102	59.092	3.04021	13.0351	0.547102	0.000146909	0.00564739
HML1_7q33a	12.6889	40.482	5.61847	11.1333	0.561697	0.000149029	0.00567774
ERV316A3_19q13.11b	62.0681	627.112	0.828245	3.77267	0.494707	0.000157121	0.00593306
HML5_Xq13.1b	15.197	76.7535	2.2058	18.493	0.49662	0.000167553	0.00627149
HERVH_4q34.3b	13.3142	73.7407	7.03651	72.7524	0.544597	0.000171512	0.00635742
HERVH_4q24b	235.451	1469.93	71.4279	785.628	0.869871	0.000174068	0.00635742
MER4_Xq21.1a	25.5632	45.3765	43.4658	43.6358	-0.674236	0.000174319	0.00635742
ERVLE_13q21.1a	11.5445	25.2882	5.83262	15.3662	0.564248	0.000177344	0.00641294
ERVLE_6q23.2b	37.0246	102.33	8.89477	25.5201	0.771426	0.000186132	0.00667418
LTR19_4q35.1	25.2279	26.1708	47.7772	55.8487	-0.648089	0.000189077	0.00672325
PRIMA4_14q22.1	35.2098	43.1442	55.7368	49.021	-0.632318	0.000193874	0.00683688
MER4B_17p11.2c	17.2018	77.4746	5.18478	28.7678	0.601091	0.000200158	0.00697067
HARLEQUIN_2p24.3	13.2572	82.2269	1.82375	9.56492	0.522286	0.000202164	0.00697067
HERVL_9q11	15.5606	125.471	0.777552	4.30437	0.462486	0.000202569	0.00697067
HUERSP3B_8p12	12.1753	124.106	0.310418	2.10777	0.390355	0.00020515	0.00700299
HERVL_8q21.3c	19.3454	63.9043	4.91937	14.3899	0.621512	0.000208796	0.0070709
ERVLB4_4q35.2a	9.5511	26.3159	3.58064	13.5023	0.562327	0.000213559	0.00716108
HERVL_21q21.3i	39.9828	36.7387	56.64	44.9367	-0.582627	0.000214816	0.00716108
PABLA_19q13.2	43.022	43.0852	69.7875	61.143	-0.644007	0.000219203	0.00725069
HERVEA_10q23.1	76.4703	745.714	2.44428	8.22491	0.545791	0.000225836	0.00741263
MER34B_7q36.3a	7.68619	25.4695	3.64011	17.475	0.503822	0.000230196	0.00743236
HML3_Xq13.3	481.082	303.828	584.935	251.149	-0.37317	0.000230626	0.00743236
MER41_3p22.1b	151.777	105.321	189.777	101.576	-0.426954	0.000232087	0.00743236
MER61_18q22.3	31.2709	313.154	0.537849	2.35656	0.409741	0.000233404	0.00743236
ERV316A3_6p21.2a	67.3534	115.779	112.404	181.72	-0.814543	0.000239214	0.00750625
HERV30_11q14.2	109.364	133.879	62.9423	65.9664	0.653623	0.000239243	0.00750625
ERV316A3_1q32.2a	1015.15	2247.62	1583.31	2539.75	-1.16897	0.000243626	0.00758796
MER41_17q21.32b	7.38212	24.9325	18.1498	197.536	0.557055	0.000248462	0.00768253
MER4_12q13.3b	15.9192	116.255	2.84562	23.4167	0.513306	0.000250357	0.00768543
ERVLB4_3q12.3	9.83801	18.9777	7.3487	28.1529	0.566709	0.000256349	0.00775246
MER4_12p12.1	89.239	94.1412	154.88	186.17	-0.665261	0.000257736	0.00775246
HERVH_3q26.1i	23.0601	87.702	58.3539	137.132	-0.788495	0.000257991	0.00775246
ERV316A3_7q21.3a	76.4038	589.071	5.68699	17.2851	0.69196	0.000266797	0.007961
HERVL74_16q24.3	927.41	556.134	1267.08	872.206	-0.412125	0.000270811	0.00802466
LTR19_12q13.3	6.85547	12.808	4.1826	8.50496	0.482932	0.00028051	0.00813529
ERV316A3_6p22.1m	36.5492	51.9366	56.2039	60.3123	-0.730236	0.000282418	0.00813529
ERV316A3_8q13.3b	7.3165	17.4448	3.47543	9.00954	0.504933	0.000283574	0.00813529
HERVFC2_Xq21.33	24.2017	178.911	1.9258	13.4434	0.49923	0.000284806	0.00813529
HERVH_4q32.3d	21.3932	75.1654	4.59237	15.5684	0.62698	0.000285675	0.00813529
ERVLE_12q23.1a	9.08256	22.7816	4.46837	12.148	0.543157	0.000285984	0.00813529
MER101_3q13.13	16.4598	18.5395	30.0758	29.7864	-0.600779	0.000292728	0.0082342
HERVE_2q13	7.5793	11.5303	4.951	8.76571	0.485158	0.000293321	0.0082342
HERVI_15q11.1	14.7174	85.814	3.44531	21.6451	0.539626	0.000299191	0.00831706
HERVEA_12q23.1a	7.5425	20.8199	4.45805	13.0399	0.523372	0.000302117	0.00831706
ERVLE_13q33.3d	21.6049	67.6374	8.89959	28.5963	0.661399	0.000303227	0.00831706
HERVFRD_3q13.33	22.5081	85.7446	8.49204	24.2132	0.632185	0.000304069	0.00831706
HERVE_2p14a	30.5035	43.8968	51.4376	53.571	-0.688517	0.000312086	0.00848198
HERVP71A_13q31.3	29.1646	231.017	1.65321	9.05089	0.497035	0.000326977	0.00883044
MER4_17q21.2d	44.3741	93.6424	93.3388	165.726	-0.866174	0.000337689	0.00903313
ERVLE_15q21.2	122.869	219.257	50.479	67.6853	0.838401	0.000338716	0.00903313
MER41_17q25.3	24.5007	93.4559	6.56232	14.2225	0.624477	0.000344946	0.00914214
HERVFRD_1p31.1b	35.6329	92.7486	15.5099	62.3979	0.772499	0.000355698	0.00936891
MER61_18q12.3a	117.2	128.831	74.0648	125.763	0.869575	0.00036844	0.00959186
ERVLE_9p21.1	8.05219	42.2649	2.83441	14.4991	0.477756	0.000369314	0.00959186
HML5_9p23	23.5287	156.359	2.38684	14.9822	0.488771	0.00037903	0.00959186
HERVH_18q12.1a	132.921	1296.51	2.25944	13.1621	0.580076	0.000380695	0.00959186
ERV316A3_7q21.11d	21.2023	175.072	1.20113	4.29719	0.437313	0.000380863	0.00959186
HERVL_1p21.2	43.5598	449.216	0.227099	2.37891	0.413115	0.000380929	0.00959186
ERV316A3_8q21.13j	21.1734	69.065	9.08804	39.2515	0.645393	0.000381665	0.00959186
MER4B_11q13.2	8382.45	6390.91	6044.75	4066.59	0.442388	0.000382146	0.00959186
MER41_15q24.1	23.4535	137.061	5.63917	12.1238	0.560909	0.000384793	0.00960183
HERVK11_1p33	16.395	61.2291	32.3466	49.6602	-0.706376	0.000387818	0.00962104
HERVL_9q21.11b	42.3627	251.191	4.23745	24.7353	0.606135	0.000391664	0.0096603
ERVLB4_12p13.32	9.55436	22.9784	4.05661	9.03064	0.512181	0.000410029	0.0100204
HERVIP10FH_10q23.33	384.865	2980.36	35.1923	234.888	0.938097	0.000411859	0.0100204
MER4_12p12.2a	29.7105	77.8843	15.6256	51.5852	0.761442	0.000414042	0.0100204
HERVH_13q33.3	12650.8	33047.5	3011.36	13110.3	1.74302	0.000419912	0.0100204
HERV3_13q32.3	6.83788	12.4474	3.89384	7.40478	0.46626	0.000421711	0.0100204
MER41_1p34.3	25.0406	33.2918	36.5568	33.1275	-0.584111	0.000422397	0.0100204
HERVH_2p14a	27.4966	60.8503	8.892	19.0042	0.682431	0.000424795	0.0100204
ERV316A3_Xq27.2c	8.56707	38.6293	6.96096	39.4899	0.508787	0.000425049	0.0100204
ERVLE_Xp11.22a	65.9975	64.5476	97.8292	80.0384	-0.622625	0.000436101	0.0101779
HERVH_4q28.3j	188.85	1861.26	3.51045	9.81226	0.606475	0.000436504	0.0101779
ERV316A3_4q31.21e	96.823	913.857	3.11902	7.85842	0.584582	0.000443573	0.0102865
MER41_1q44a	67.0745	69.2929	89.6474	60.023	-0.558658	0.000462258	0.0106619
HARLEQUIN_2q11.2a	57.8387	332.199	18.7993	154.145	0.637335	0.000474489	0.0108852
HUERSP2_11p14.3	9.22996	89.1509	1.80647	20.9893	0.405447	0.00047741	0.0108936
ERVLE_10p15.1c	8.5759	28.288	4.41387	19.9203	0.551151	0.000481761	0.0108989
PABLB_4q25	16.2161	151.349	1.22898	3.37357	0.402428	0.000485222	0.0108989
MER41_21q22.11b	23.4878	28.6106	37.2024	39.1868	-0.589389	0.00048581	0.0108989
ERV316A3_7q31.1c	7911.65	4664.97	6151.59	4065.24	0.344692	0.000490195	0.0108989
HERVH_6q23.2a	42.0899	76.3333	78.8991	119.871	-0.821233	0.000491051	0.0108989
MER4_Xq21.31c	3669.82	2803.72	2474.45	2099.68	0.480709	0.000492966	0.0108989
HERVE_4p16.3c	9.59402	31.4061	4.53238	23.6591	0.545222	0.000510199	0.0112218
ERV316A3_7p22.3	44.8923	51.9106	32.8903	50.4951	0.733136	0.000524511	0.0114774
ERVLB4_1q25.1c	24.5065	33.5571	35.41	32.4702	-0.583977	0.00052944	0.0114856
MER4_4q13.3b	10.4457	45.8809	5.10145	33.0922	0.528661	0.00053027	0.0114856
MER4_Yp11.2e	23.7789	50.0397	10.6793	31.4804	0.708168	0.000545142	0.0117314
ERVLB4_2q12.1a	10.4209	47.1954	2.75999	7.94556	0.498161	0.000547118	0.0117314
HERVH_9q31.1	73.2622	58.7439	97.2359	64.9714	-0.543044	0.000552229	0.0117818
HARLEQUIN_17q12	617.563	486.573	900.429	705.92	-0.576504	0.000578651	0.0122841
ERVLE_11q13.4c	9.95196	86.272	1.23772	4.34272	0.395923	0.000582403	0.0123025
MER4_17p11.2a	28.0605	61.2119	10.7657	16.5935	0.639916	0.000587169	0.0123034
ERV316A3_13q31.1e	12.4246	91.7762	1.67208	5.95365	0.465998	0.000588211	0.0123034
HERVL_3p24.3c	10.6898	26.6861	5.43776	15.3999	0.53658	0.000610843	0.0126535
HERV4_20q13.33b	177.829	231.549	255.588	299.118	-0.833243	0.00061088	0.0126535
ERVLB4_22q13.32a	10.5446	64.0062	6.4229	46.919	0.473275	0.000626245	0.0129091
HML2_19q11	20.3298	84.7403	6.07535	21.9735	0.591871	0.000635689	0.0130408
HML5_8p23.1b	43.6471	418.159	1.29792	4.03713	0.47533	0.000641896	0.0131051
HERVH_17q22b	60.8939	155.636	33.5948	76.5554	0.864648	0.000647719	0.013161
HML5_1q23.1	10.2605	19.9849	21.9886	30.6796	-0.555432	0.00065907	0.0133282
ERVL_21q21.1c	12.5686	68.9233	2.46087	12.4515	0.478389	0.000664431	0.0133732
MER41_6q26b	43.1024	258.01	3.13737	15.3218	0.558363	0.000686076	0.0137266
HERVH_20p12.1b	25.9557	254.362	1.10272	4.28268	0.424074	0.00068842	0.0137266
HERVH_19p13.2d	1188.78	745.791	1547.71	883.3	-0.416486	0.000696987	0.0138328
MER4B_4p16.1b	6.47708	22.1375	9.48123	71.581	0.490918	0.000707133	0.0139286
HERVH_4q21.21a	57.381	556.047	2.90311	8.71578	0.492326	0.000708346	0.0139286
ERVLE_9q22.32	7.08999	18.3409	3.89551	13.2876	0.490775	0.000727024	0.0142108
ERV316A3_4q32.2d	8.54941	16.8121	5.23232	9.85855	0.494457	0.000729355	0.0142108
MER4B_22q11.1	8.57406	47.2103	2.88814	21.4722	0.462617	0.000735941	0.0142739
HUERSP3_1q42.12	847.687	923.082	565.574	585	0.472081	0.00074113	0.0143095
MER101_1q42.13a	349.379	352.14	285.523	509.13	0.842568	0.000765104	0.0146603
HERVI_14q11.2	10.152	48.7048	3.75847	18.1072	0.493034	0.000767893	0.0146603
LTR25_Yq11.221c	18.4907	88.721	6.65917	35.6808	0.56091	0.000769607	0.0146603
HERVL_6q14.1e	10.7555	16.6817	6.47695	11.4999	0.512748	0.000778714	0.0147146
HUERSP1_11p15.4b	120.613	159.325	156.951	112.093	-0.559695	0.000779356	0.0147146
ERV316A3_7q33a	23.9006	71.3453	9.06221	29.8745	0.64788	0.000792601	0.0148988
HUERSP3_6p21.32	253.103	249.593	644.8	3126.77	-0.642275	0.000826918	0.0154102
HERVL_11q22.3g	49.8829	195.269	11.0496	28.1184	0.678461	0.000827029	0.0154102
HUERSP3B_Xq13.2b	228.852	163.599	315.897	233.479	-0.487483	0.000856527	0.0158904
ERVLB4_3p21.31c	21.4303	69.4512	12.1269	44.2818	0.620479	0.000862092	0.0159244
HERVH_3p11.1b	11.3482	38.2632	6.96773	37.0542	0.512687	0.000873717	0.0160308
ERV316A3_9q32a	23.9304	48.4321	47.9261	71.2492	-0.674147	0.000875362	0.0160308
HUERSP3_8q23.3	8.00073	25.3571	5.33594	19.31	0.488771	0.000893032	0.0162205
HERVH_10p11.22	9.14378	20.725	5.30704	11.7834	0.51695	0.000893328	0.0162205
HERVH_3q25.2b	7.60961	16.5789	3.97626	9.84878	0.453029	0.00090168	0.0163028
HERVL_4q31.21b	136.844	86.9483	107.074	88.0881	0.424893	0.000922785	0.016614
HERVL_18q12.1a	12.4265	44.2716	6.60849	37.5617	0.546746	0.000934442	0.016687
MER41_1p36.12	4718.54	2589.47	3725.44	1949.51	0.327544	0.000934658	0.016687
MER61_6q13b	19.1621	26.565	38.2658	47.2211	-0.621938	0.000965461	0.0171055
HML2_3q12.3	3588.77	3565.35	4788.77	3912.99	-0.48813	0.000966119	0.0171055
HERVL32_5q14.3	9.20282	23.7542	4.67723	12.8306	0.509581	0.000970286	0.0171083
HERVFH21_Xq11.2b	310.472	537.085	432.57	541.289	-0.879879	0.000989666	0.0173782
HARLEQUIN_2q11.2b	59.2676	343.363	18.8351	160.547	0.589406	0.00100614	0.0175951
HERVL_1p32.2a	11.9883	64.5808	3.09383	6.14021	0.479818	0.00101512	0.0176797
ERVLE_1q41e	16.0337	65.7713	11.6621	82.0652	0.562457	0.00102048	0.0177007
ERV316A3_9p21.1b	51.701	205.326	18.2486	75.2844	0.739741	0.00102622	0.0177283
MER4B_7p12.2	11.8606	38.9	8.59415	41.5133	0.546501	0.00103513	0.01781
HERVIP10FH_19q13.43	869.584	583.28	1168.1	1161.01	-0.383997	0.00104699	0.0179418
MER41_17p11.2c	6.86428	30.9082	5.08195	29.0555	0.447279	0.0010625	0.0181348
MER41_4q32.1c	8.04598	24.4492	6.22843	44.5699	0.482028	0.00108233	0.0183996
ERVLE_5q12.3a	42.0765	43.5892	75.4617	90.07	-0.625865	0.00110078	0.018639
HML1_15q24.2	21.1261	21.2112	33.2721	27.5288	-0.518278	0.00110856	0.0186966
HML1_7q33b	11.2849	66.5544	3.20192	12.3767	0.442518	0.00113547	0.0190751
ERVLB4_8p23.1k	26.4851	49.581	14.5823	33.0539	0.653097	0.00118275	0.0197914
HERVH_7q21.2	130.716	112.42	173.919	125.232	-0.504141	0.00119941	0.0199917
ERVLE_1q21.3b	12.0662	23.2295	6.86467	11.094	0.496815	0.00121121	0.0200881
ERVLB4_5p13.3d	21.0971	142.755	3.50979	26.3923	0.470104	0.00121461	0.0200881
HUERSP3_1q44	42.3346	100.841	83.1762	152.237	-0.704085	0.00123335	0.0203193
ERVLB4_13q31.2d	8.50644	25.3211	4.10698	14.2789	0.47862	0.00124009	0.0203519
ERVLE_14q21.2a	7.56005	20.5321	4.56461	16.5521	0.478235	0.00125992	0.020598
HERVH_4p16.1d	68.6319	138.939	109.82	182.961	-0.805679	0.00126519	0.0206051
HERVIP10FH_7q21.13	7.16045	23.6713	4.65386	19.2799	0.472148	0.00127546	0.0206934
HERVL74_6p25.1	910.646	858.908	611.554	402.34	0.391075	0.0013068	0.0211217
ERVLE_1q42.2b	17.8549	27.5706	14.0326	26.6543	0.526895	0.00131438	0.0211641
HERVH_1p32.3e	12.2399	31.8037	5.13659	11.6333	0.504121	0.00132254	0.0212153
HERVH_13q13.3b	163.398	249.836	262.223	390.14	-0.761144	0.00134179	0.0214436
MER4_1q41b	19.7706	76.8888	4.92103	18.2299	0.545325	0.00135685	0.0216032
MER34B_1p13.2	23.2726	49.3379	13.24	27.5547	0.613936	0.00147609	0.0234144
HERVL40_10p12.1	11.9123	13.999	21.1453	19.1172	-0.463557	0.00151141	0.0238479
ERV316A3_1q21.3b	18.3038	46.7082	41.6987	77.2334	-0.607424	0.00151459	0.0238479
MER101_13q34a	10.3154	41.9346	4.12459	14.6515	0.464264	0.00152736	0.0239604
MER61_3q13.11	9.14142	13.0592	19.8711	24.5312	-0.505546	0.00154314	0.0241111
ERV316A3_1p31.3f	42.3794	51.1791	55.37	45.309	-0.544016	0.00155279	0.0241111
HERVL32_7q31.1	18.012	24.379	29.2441	35.0376	-0.54714	0.00156368	0.0241111
HERVH_2p13.3a	167.953	105.801	207.309	96.8454	-0.360095	0.0015652	0.0241111
ERVL_14q12	22.6587	54.4533	11.9397	38.7009	0.643723	0.00156521	0.0241111
ERVLE_5q33.3	46.058	40.9888	66.8919	56.6086	-0.512588	0.00157928	0.0242402
HERVL_12q21.2b	419.861	853.95	525.739	641.829	-0.767599	0.00162372	0.0247134
HERVH_15q26.2a	12.2617	68.8717	2.01653	9.03753	0.440854	0.00162939	0.0247134
HERVL40_5q11.2	16.6822	18.1264	28.205	25.0082	-0.493602	0.00163607	0.0247134
HERVH_4q32.3c	8.20478	50.634	3.83094	23.6582	0.432363	0.00163967	0.0247134
ERV316A3_7p12.1a	7.19223	18.6412	4.45189	11.5295	0.453095	0.00164299	0.0247134
HERVE_19p12	1891.33	3178.98	3022.46	4602.99	-1.05796	0.00164485	0.0247134
HERVH_1p31.3c	34.7377	240.993	2.61935	9.91286	0.472694	0.0016644	0.0249192
HERVIP10FH_11p15.5	2264.05	7150.46	4616.66	12806.4	-0.967665	0.00168813	0.0250462
HERVFH21_Xq11.2a	86.8455	139.655	119.659	139.764	-0.778431	0.00168868	0.0250462
ERV316A3_14q23.1a	24.5187	235.294	1.04039	5.45256	0.408809	0.00169049	0.0250462
MER61_1q23.1c	770.83	1231.05	1104.51	1290.82	-0.713138	0.00169778	0.0250672
HUERSP3B_1q21.3	3470.64	3478.84	2225.62	1840.7	0.510714	0.00172597	0.0253955
HERVW_13q31.1	14.007	58.0343	5.62321	24.7131	0.507725	0.0017353	0.0254451
MER61_12q14.1a	14.7465	151.774	0.654436	5.12222	0.347939	0.00176153	0.0257413
ERVLE_4q24i	389.514	220.535	311.244	161.9	0.293182	0.00177483	0.025847
ERV316A3_3q13.33a	0.817587	4.14261	11.806	135.36	0.330073	0.00178217	0.0258658
HERVH_5q31.1a	76.7159	82.7837	101.556	86.5826	-0.504445	0.00181402	0.0262387
ERVLE_4q13.3g	224.372	230.848	264.066	165.089	-0.492233	0.00185444	0.0266947
MER41_7q22.3b	12.7327	28.6215	7.74162	23.4659	0.53588	0.00185805	0.0266947
ERV316A3_11p15.4k	8.84534	10.2228	6.74392	8.60072	0.402874	0.00192506	0.0273923
PRIMA41_13q22.3	10.0682	93.5059	1.18047	5.07476	0.346347	0.00192611	0.0273923
MER4B_7q33a	13.8375	33.101	7.76352	19.4149	0.537399	0.00192642	0.0273923
HERVH_8p23.1f	15.4616	144.314	1.19715	3.65627	0.384024	0.00193229	0.0273923
HERVL_22q13.31	321.084	376.74	450.675	640.518	-0.572654	0.00195624	0.027579
MER4_4p11a	12.0476	38.796	9.08588	34.253	0.533539	0.00195838	0.027579
ERVLE_7q21.3a	6.02058	11.3683	4.22748	8.50167	0.417086	0.00199094	0.0279453
ERV316A3_5p14.1b	20.5099	63.2195	10.2779	30.4081	0.579586	0.00200137	0.0279996
ERVLE_8q24.23d	37.0744	138.933	10.0394	45.5399	0.624924	0.00202014	0.0280935
HERVH_Xp21.3b	17.5715	162.628	2.66281	15.9012	0.373322	0.00202126	0.0280935
MER4_7q31.1b	5.31705	14.2826	5.38288	20.6691	0.442862	0.00204261	0.0282917
HERVH_1p36.12	8.78484	37.3742	2.9394	11.8863	0.417651	0.00205511	0.0282917
HERVH_3p22.1b	37.6329	38.7975	50.3522	37.7704	-0.544577	0.00205541	0.0282917
HML5_5p14.3	7.29228	23.8362	3.79366	10.967	0.425064	0.00206423	0.0283218
HERVS71_4p16.1b	72.5344	169.364	90.9062	130.232	-0.696606	0.00212516	0.0290643
ERVLE_10p15.1d	5.53233	8.372	4.88349	10.0523	0.40804	0.00213588	0.0291175
HUERSP3B_1p33a	323.602	692.22	632.439	976.523	-1.08303	0.00215345	0.0292636
ERV316A3_14q13.1b	11.4164	18.9164	8.28535	18.6306	0.500285	0.00218202	0.0295572
HERV3_11p14.1	8.97336	38.3826	4.38047	16.2328	0.434861	0.00218891	0.0295572
HERVFRD_2p25.3	31.8264	115.238	8.44611	25.841	0.571983	0.00221188	0.0297732
PRIMA41_22p11.2b	8.54687	33.5998	10.4431	97.8519	0.431395	0.00222256	0.0298229
HERVL_13q21.1a	8.7611	33.169	4.54161	16.8333	0.461888	0.00223558	0.0299035
PRIMA41_19p12d	1225.48	997.439	1597.4	1268.75	-0.450305	0.00225234	0.0300336
HERVH_4q35.1a	1999.79	11728.6	561.097	5851.19	0.927077	0.00226438	0.0301
HERVH_11q24.2b	13.5946	30.9407	8.69584	27.8864	0.535474	0.00227814	0.0301889
ERVLE_21q22.2	9.62337	26.4481	7.79303	27.481	0.491362	0.00228541	0.0301915
ERVLE_3q25.1	26.0289	79.2386	16.2593	76.7479	0.614097	0.00230332	0.0303342
LTR25_15q21.1a	11.1295	15.2088	8.18937	13.8768	0.435184	0.00232008	0.0304608
HERV9_Yq11.221b	20.1235	98.7598	3.68559	17.5007	0.477599	0.00234217	0.0306459
HML6_19p13.2d	275.445	240.05	381.369	267.121	-0.557627	0.00234854	0.0306459
ERV316A3_6p21.33a	23.0298	46.3962	45.6246	70.0469	-0.649283	0.00238369	0.0309808
ERV316A3_9p13.3b	14.2308	93.5035	5.64759	28.9556	0.430428	0.00238873	0.0309808
HERVL18_2q33.1	7.27963	18.4988	3.94875	10.9924	0.444121	0.00242221	0.03132
HERVW_1p33b	9.00399	32.6707	19.9857	33.7384	-0.540408	0.00251682	0.0324302
HERVH_7q11.23a	166.351	211.023	199.734	143.208	-0.482637	0.00252328	0.0324302
MER61_3p23	6.60584	13.5604	4.79962	11.6701	0.431722	0.00254915	0.0325944
ERVLE_8q24.3i	36.3059	49.4277	20.5317	26.2307	0.548471	0.00255133	0.0325944
HERVH48_1p22.3	27.9558	28.5587	40.5314	38.3396	-0.481427	0.0026073	0.03321
HERVH_8q22.2	702.962	6451.49	9.80025	42.6601	0.653851	0.00264062	0.0334898
ERVLE_1p31.1j	224.426	115.292	267.958	114.824	-0.295623	0.00264496	0.0334898
HERVH_6q22.31g	398.298	2615.07	18.9995	46.628	0.774465	0.00265414	0.0335065
HML3_19p12b	271.989	167.121	356.094	292.172	-0.367607	0.00266745	0.0335451
LTR57_8q24.13	20.0694	200.66	1.02477	4.15334	0.355214	0.00267291	0.0335451
ERVLE_15q25.1a	17.6316	19.9374	28.0839	27.1061	-0.474824	0.00268785	0.0336336
HERVH_1p31.3d	13387.9	111286	3204.38	35617.2	1.18004	0.00272947	0.0337982
ERVLE_14q32.32c	6.6158	11.9583	4.56467	9.33326	0.413525	0.00273568	0.0337982
ERV316A3_Xq28b	244.144	279.784	326.381	280.512	-0.510912	0.00273968	0.0337982
HML1_14q32.32	18.7182	111.283	3.70415	20.0426	0.440685	0.00274495	0.0337982
ERV316A3_5p15.32a	43.7605	104.012	29.7739	117.56	0.732391	0.00274845	0.0337982
HERVL40_15q23	123.277	289.862	180.391	384.95	-0.778129	0.00274853	0.0337982
MER61_4q32.3	12.2643	35.8057	11.0427	66.2554	0.52721	0.00276575	0.0339123
ERVLE_17q22a	17.8307	67.0613	7.81482	35.7889	0.52576	0.00278962	0.034107
MER4B_9p13.3	72.0818	61.7874	96.5558	73.4866	-0.490731	0.00281449	0.0343126
ERVLB4_2q21.1c	55.9458	71.6977	33.4343	40.3706	0.523077	0.00282772	0.0343758
MER41_19q13.2a	42.6312	42.4148	61.5799	69.7841	-0.498584	0.00284666	0.0345076
HERVL_2q37.1	296.953	778.584	96.4853	163.02	0.854531	0.00290695	0.0351387
MER4_13q12.12c	377.815	695.496	184.896	227.854	0.558374	0.00295944	0.0356722
ERVLE_7q36.2d	16.1196	84.2871	9.03448	50.8451	0.485815	0.00297597	0.0357704
MER4_4q23b	118.939	163.579	149.692	122.958	-0.514536	0.00298925	0.0358291
HERVH_11q13.2d	84.7126	103.108	127.3	153.786	-0.715174	0.00300728	0.0359225
LTR19_19q13.2	8.27774	25.8517	4.57718	8.34718	0.413381	0.00302157	0.0359225
HML2_1q32.2	57.8087	61.1009	94.5859	118.185	-0.634282	0.0030223	0.0359225
ERVLE_1p21.3c	113.353	77.6213	140.205	82.3003	-0.365421	0.00312401	0.0370282
ERV316A3_18p11.32c	19.1823	36.7119	14.628	41.5005	0.581242	0.0031448	0.0370989
HERVH_8q22.3b	22.1542	132.614	3.50553	12.6089	0.468483	0.00315713	0.0370989
HERVP71A_12p13.31a	6.34979	12.1178	4.64985	10.7113	0.412658	0.00316015	0.0370989
HUERSP3_Yq11.223a	6.63868	11.963	5.45454	13.2705	0.431509	0.00316572	0.0370989
ERVLE_12q21.2	6.89296	9.60771	5.57228	8.65017	0.379344	0.00317345	0.0370989
HERVH_9p13.3c	266.654	207.882	361.205	282.074	-0.455638	0.00318556	0.0371388
HERVKC4_19q11	10.5103	21.1863	6.60206	11.4761	0.42852	0.00319464	0.0371431
HERVH_8q22.1a	197.352	209.341	244.364	194.677	-0.507498	0.00323675	0.0375305
HERVFRD_4q32.3	29.173	38.6966	21.7544	40.9417	0.605473	0.00327492	0.0378701
ERV316A3_12q21.33h	4.29967	19.1302	7.54531	59.7879	0.380482	0.00328457	0.0378791
ERV316A3_14q32.31b	18.8144	109.776	5.16101	21.0706	0.456433	0.0033103	0.0380729
HML1_10q22.1	8.4233	19.0627	6.66599	20.5998	0.436431	0.00333806	0.038289
ERVLB4_7q22.1b	18.92	69.3325	9.36	41.0544	0.502765	0.00335222	0.0383483
HERVL_Xq11.1a	108.852	69.4433	140.106	86.1567	-0.374269	0.00339594	0.038653
ERV316A3_2q14.1k	13.8001	76.6872	4.38123	14.641	0.443839	0.00339697	0.038653
PABLB_14q11.2a	99.5276	148.576	237.559	619.267	-0.760502	0.00349461	0.0396582
MER4B_2q31.1	5139.9	4798.6	3853.07	3803.05	0.349663	0.00352447	0.0398142
MER4_2p21	123.429	95.1092	161.346	119.646	-0.415535	0.00352701	0.0398142
HERVH_1q42.2a	777.095	7049.65	66.4907	633.334	0.777258	0.00354983	0.0398903
HERVH48_8q24.13	139.399	107.558	172.98	98.1298	-0.3982	0.00355245	0.0398903
HERV9_6q25.1	142.37	139.225	182.53	137.051	-0.503807	0.00356797	0.0399594
HERVL40_4q31.3b	170.04	105.893	214.737	124.859	-0.366564	0.00359459	0.0401521
HUERSP3_Xq27.1	1.87317	6.91941	8.7438	90.4252	0.337663	0.00362245	0.0403577
ERVLE_1p31.1s	14.1183	100.44	5.2209	37.0444	0.406179	0.00372906	0.0414372
ERV316A3_5p15.2a	6.54696	18.177	5.86909	21.7452	0.431743	0.00377915	0.0418848
HERV9_8q11.21b	9.30226	13.7395	6.34321	8.53877	0.410623	0.00379517	0.0419533
HERVW_Xp11.3	11.191	29.4605	6.08971	16.8991	0.469785	0.00380576	0.0419617
HERVIP10F_7q33a	1.43554	5.29179	7.97184	83.7126	0.332812	0.00382198	0.0419748
HERVIP10FH_8q21.3	14.4303	25.0732	8.71016	17.9791	0.506588	0.00384667	0.0419748
HML4_16p13.3	3337.2	1998.94	4140.02	2224.89	-0.310423	0.00385024	0.0419748
HERVL_12p13.2a	17.2032	20.2422	11.4646	13.1504	0.446835	0.00385284	0.0419748
ERVLB4_10q11.22b	61.4931	129.995	26.8831	64.7336	0.733903	0.00385613	0.0419748
ERVLE_1p36.32a	72.6764	94.8315	105.157	115.484	-0.511776	0.00388448	0.042145
HML5_3q26.2	286.741	235.726	387.098	298.718	-0.401227	0.00389152	0.042145
MER61_6q22.33	17.4415	34.6367	8.88723	18.6759	0.529968	0.00394927	0.0426621
HERVL_7q36.1b	14966.1	11741.5	12298.6	13854.6	0.362019	0.0039794	0.042879
HML2_19q13.41b	13.9386	25.7309	24.385	37.0791	-0.487809	0.0040247	0.0432579
ERVLE_6p21.33	26.6888	91.826	10.1221	17.3612	0.540099	0.00407403	0.0436781
HERVH_14q32.12a	585.375	351.997	696.881	353.718	-0.293668	0.00413647	0.0442364
HML5_11q12.1	7.16103	20.7509	4.90903	16.1409	0.428483	0.00415869	0.0443629
HERVE_4p16.1a	10.8057	67.4812	2.50167	9.22435	0.393373	0.00422405	0.0449477
PABLA_7q32.1	234.983	381.53	180.77	602.376	0.943111	0.00424916	0.044992
HML5_19q11	546.013	513.059	402.288	380.96	0.401278	0.00425605	0.044992
MER101_8p21.3	24.5703	25.1837	35.0881	29.4134	-0.46971	0.00425985	0.044992
HML6_12p11.21	15.2208	16.7054	12.1664	15.6264	0.430728	0.00428009	0.0450032
HERVH_4p15.2b	109.998	525.823	16.9486	93.4222	0.624173	0.004282	0.0450032
MER4_7p12.2	10.9222	37.1852	5.92209	29.3483	0.450423	0.00429493	0.0450282
ERV316A3_6p22.1k	108.857	151.519	148.394	150.801	-0.628929	0.0043351	0.0453379
ERVLE_6q22.31g	6.35337	10.3379	4.59635	7.6586	0.369889	0.00436682	0.0455276
ERVLB4_12p13.2a	14.1578	86.4575	4.26031	8.31786	0.398623	0.00437457	0.0455276
ERVLE_7p14.3a	11.5934	22.7117	7.08727	15.1303	0.435851	0.00438534	0.0455286
HML3_3q21.2	29.2789	34.5963	42.0632	46.1146	-0.527817	0.00442172	0.0456123
MER61_3p24.3	9.52698	43.7843	3.4083	16.1531	0.402484	0.00442399	0.0456123
HERVIP10FH_4p15.33	7.10476	39.2753	4.96673	34.4411	0.379695	0.0044617	0.0456123
HERVW_1p22.2a	220.204	146.845	261.92	128.97	-0.346018	0.00446644	0.0456123
MER4B_Yq11.221b	60.2601	244.589	12.8175	61.3361	0.618942	0.00446658	0.0456123
ERVLB4_18p11.32e	23.1994	120.761	13.8978	74.5555	0.509442	0.00446703	0.0456123
ERV316A3_3q13.31b	25.1761	95.1895	7.19017	18.7714	0.52705	0.00446823	0.0456123
ERV316A3_3q28d	7.47087	37.1346	7.9545	65.4601	0.398595	0.00448226	0.0456393
HERVEA_1p21.1d	14.2291	89.2204	2.07443	6.35649	0.380554	0.00449227	0.0456393
HML6_19q13.41f	554.176	788.628	680.986	761.719	-0.613658	0.0046271	0.046749
ERVLE_8q22.2b	9.30193	17.0557	6.17051	14.3623	0.424179	0.00462757	0.046749
MER101_1p22.2b	29.6248	36.2106	41.0859	42.2345	-0.520471	0.00466064	0.046749
MER61_5p13.2	28.8791	65.154	55.8964	109.962	-0.588441	0.00466308	0.046749
HERVW_1q32.3a	10.8763	35.2514	5.47241	21.5764	0.450498	0.00466711	0.046749
MER61_2q35	51.0067	61.2287	72.403	76.6692	-0.485949	0.00466724	0.046749
HUERSP2_5p13.2	12.7327	70.4994	7.24404	53.1945	0.442262	0.0046994	0.046961
HERVH_7q22.3a	13.8516	20.7955	8.96358	13.5441	0.475308	0.00475522	0.0473872
HERVH_11q12.3	7.70245	16.9197	5.71579	15.2679	0.421137	0.00476426	0.0473872
ERV316A3_22q12.3b	102.628	831.021	6.71654	32.8663	0.535757	0.00486152	0.0482421
HERVH_21q22.13	13.1542	66.3591	4.4057	12.3348	0.42013	0.0048738	0.0482517
HML6_12q24.12a	839.906	735.278	1161.23	982.53	-0.496686	0.00494089	0.0488027
ERVLE_1q32.2a	171.992	348.14	271.96	446.429	-0.800635	0.00495252	0.0488046
HML2_6q25.1	80.7596	78.8881	106.248	84.905	-0.506414	0.00500766	0.0490665
ERVLB4_Xq26.3h	5.60686	34.6314	5.89701	50.6075	0.353046	0.00502746	0.0490665
HERVFRD_18p11.31	10.5184	94.556	1.48257	6.19753	0.313787	0.00504267	0.0490665
HERVW_13q21.1	64.4466	206.622	31.9062	129.065	0.699288	0.00504346	0.0490665
HERVH_8q24.23c	109.255	454.746	113.208	208.898	-0.799959	0.00505294	0.0490665
HERVL18_11q14.2b	59.1566	137.759	73.5291	118.319	-0.669007	0.00505423	0.0490665
HERVL_5p15.32a	7.49833	21.3053	5.38995	18.2675	0.423715	0.00505996	0.0490665
HERVH_1p31.1i	362.344	3669.29	28.881	242.122	0.560836	0.00507109	0.0490665
MER41_4q22.1c	6.24645	18.6782	5.40555	19.5955	0.41178	0.00513026	0.0492792
ERVLE_1q23.1d	7.05006	35.7541	3.70089	12.4045	0.376926	0.00514382	0.0492792
HERVFRD_16q23.1	2475.09	1817.28	2011.24	1752.89	0.316953	0.00516303	0.0492792
HML4_8q24.3	12999.3	7245.77	10880.8	7739.14	0.281091	0.00516616	0.0492792
ERVLE_4q32.1g	6.63242	10.844	5.22834	10.1994	0.376968	0.00516879	0.0492792
HERVH_2p22.2c	169.381	394.166	236.143	394.18	-0.759306	0.00517631	0.0492792
HML4_3q26.2	5.8479	13.2744	6.44498	33.907	0.411091	0.00519625	0.0492792
ERVLE_7p22.3	46.3216	65.7913	33.5475	65.2383	0.568427	0.00520876	0.0492792
MER41_6q14.1c	4.63422	8.28385	8.62443	67.1307	0.378174	0.00521711	0.0492792
ERVLB4_21q22.3a	28.1614	34.0212	44.1004	48.8429	-0.506445	0.00521975	0.0492792
HERVW_3q23b	14.0477	17.0376	22.2719	22.6714	-0.430876	0.00522011	0.0492792
HERVP71A_3p26.1	136.987	135.279	174.305	134.383	-0.431608	0.00526984	0.0495579
LTR25_2p13.3	112.406	124.408	142.652	125.651	-0.459279	0.00527286	0.0495579
HERV9_6p22.3	34.828	32.0157	52.8454	51.3937	-0.473545	0.00531367	0.0498173
PRIMA4_12p11.21b	326.691	270.711	246.683	160.15	0.354088	0.00532381	0.0498173
HERVIP10FH_12p13.2	56.4866	69.846	73.6452	68.4028	-0.460197	0.00538717	0.0501747
HERVH_7p21.1a	610.919	820.19	1017.36	1289.28	-0.78023	0.00539076	0.0501747
ERV316A3_8q24.3k	222.214	164.279	263.357	149.279	-0.371536	0.00540551	0.0501747
MER4_8q24.3b	573.665	425.441	691.334	475.228	-0.366731	0.00541056	0.0501747
MER34B_14q21.2	15.8503	85.2022	4.94704	17.9589	0.446312	0.0054208	0.0501747
ERVLE_12q13.11b	10.0441	15.6064	16.829	17.3694	-0.411214	0.00546303	0.050406
HERVH_1p33	59.9907	72.251	80.8705	72.2051	-0.586434	0.00546941	0.050406
HERVL_1p21.1d	16.3265	124.26	4.60526	17.9601	0.419961	0.00553091	0.0508629
ERVLB4_11p15.5a	20.8123	50.5038	15.3116	56.7999	0.511965	0.00554543	0.0508868
HERVH_7q22.3b	491.198	1883.3	228.825	784.985	1.00467	0.00557874	0.0510826
MER4_4p16.1b	5.62641	18.0579	7.88919	53.7781	0.412714	0.00559298	0.0511033
HERVIP10F_14q11.2c	190.741	305.866	429.877	1422.17	-0.69487	0.00563417	0.0513697
HUERSP1_12p12.1	26.6316	93.3438	18.053	64.0191	0.557677	0.00566928	0.0515796
ERV316A3_Xp11.3c	8.41219	27.6021	13.1065	91.4661	0.441711	0.00569217	0.0516777
HML5_Xp21.3	6.62045	31.0466	14.5209	116.959	0.402737	0.0057587	0.0521707
MER41_9p21.1a	18.2728	73.2252	10.9366	40.7097	0.508825	0.00582142	0.0524956
ERVLB4_3p21.31a	905.144	407.691	1067.44	487.437	-0.242939	0.00583235	0.0524956
PRIMA41_7q32.2	6.8347	12.1114	5.99154	15.6746	0.361895	0.00584081	0.0524956
HERVIP10FH_6q26b	409.391	2522.96	16.2869	71.1568	0.681164	0.00584378	0.0524956
ERVLB4_17q25.3b	101.205	81.8028	157.646	158.713	-0.439683	0.00588235	0.0526692
HERVH_7q11.23b	9.5602	23.3936	5.55863	12.1062	0.414807	0.0058878	0.0526692
HUERSP3_12p12.2	43.1437	196.78	26.6171	149.437	0.604564	0.00590821	0.0527413
ERVLE_8q21.13a	5.9455	13.0315	4.9131	13.408	0.393403	0.00594712	0.0529778
HUERSP3B_2p15	6.78787	11.5451	5.11331	9.27808	0.383342	0.00598234	0.0531805
ERVL_Xp11.22a	985.714	601.219	1161.15	626.935	-0.316263	0.00600725	0.0531847
HERVIP10F_2q11.2	104.944	661.769	29.7975	237.761	0.536603	0.00600774	0.0531847
HERVH_2p21b	8.99564	38.8966	4.2257	24.8437	0.383102	0.00609544	0.0538494
ERV316A3_11q24.1	8.25859	25.2012	5.53046	16.5583	0.399495	0.00614027	0.0541333
HERVP71A_10q11.22	45.3804	73.6851	26.8627	33.5036	0.52846	0.00617229	0.0543034
ERV316A3_4q28.3k	9.96896	30.7629	4.92001	10.8475	0.411996	0.00618975	0.054345
HML2_11p15.4a	89.8224	113.193	136.147	143.941	-0.637487	0.00624854	0.0547485
ERVLE_2q11.2b	360.773	209.718	292.651	144.281	0.251476	0.00630392	0.0551158
HML2_1q23.3	90.8609	118.399	138.952	159.582	-0.642182	0.00632014	0.0551158
HERVH_Xp21.1b	16.8442	68.8703	6.04111	11.0752	0.425486	0.00633525	0.0551158
HERVL40_13q32.1	6.86813	10.398	5.43684	8.99185	0.360408	0.00635237	0.0551158
HERVW_6q14.1	1.30737	5.84397	12.8702	140.798	0.312788	0.00636793	0.0551158
MER4_15q22.31a	28.5919	29.165	36.9053	29.1271	-0.425564	0.00639446	0.0551158
HERVH_3q13.11	49.8024	252.667	8.12999	59.8988	0.513935	0.00639685	0.0551158
HERVW_3p24.3	61.2724	135.569	122.551	276.018	-0.734279	0.00639967	0.0551158
HERVFRD_14q11.2	1761.02	2537.38	2717.45	4759.86	-0.925062	0.0064128	0.0551158
ERVLB4_7q22.3	40.7818	120.899	23.3531	83.6315	0.61655	0.00642529	0.0551158
HERVH_10p14b	10.301	70.3915	3.65094	21.8766	0.373778	0.00643254	0.0551158
HERVIP10FH_16p11.1b	33.969	35.2253	23.7264	29.633	0.487536	0.00646023	0.055213
ERVLE_13q12.11	28.8837	26.5513	41.3307	35.6003	-0.461955	0.00646977	0.055213
ERVLE_5q23.3g	23.455	39.4729	15.2237	30.3449	0.553953	0.00649481	0.0553161
HERVH_12q24.32	219.315	675.344	170.2	1050.39	0.859418	0.006577	0.0559045
PRIMA4_10p12.1	631.502	331.491	734.26	325.363	-0.256571	0.0066403	0.0563303
HERVH_6q22.1c	94.5626	114.07	79.2913	134.446	0.546609	0.00669676	0.0566806
ERVLE_3p21.31d	6.53291	13.3783	12.6928	14.3098	-0.423744	0.00670816	0.0566806
ERVLB4_2q32.1d	12.0713	21.3858	8.46847	18.2643	0.446996	0.00674949	0.0569171
HARLEQUIN_1p13.2b	146.836	163.176	212.66	280.694	-0.453402	0.00676411	0.0569279
HERVL18_9p24.1	56.6338	49.0081	85.1829	81.7677	-0.472238	0.00680746	0.05718
MER61_13q21.2	8.81572	32.1335	8.94645	45.1614	0.424182	0.00686015	0.0574923
ERVLE_5q14.3h	26.173	70.9632	15.9528	29.4216	0.533702	0.00687541	0.0574923
ERV316A3_4q24e	5.8435	12.5649	4.62258	8.81391	0.364264	0.00688506	0.0574923
HML6_6p22.2	99.0529	243.679	67.0822	137.909	0.586674	0.00695117	0.0579309
HERVL_11q14.3b	16.9703	63.6832	7.46516	24.8603	0.479204	0.00701295	0.0583319
ERV316A3_Xq26.1	509.281	288.13	408.523	224.931	0.272959	0.00708283	0.0587985
HERVH_12q21.2b	269.083	529.625	398.68	631.452	-0.792731	0.00718458	0.0595274
PABLB_20p11.1	13.0701	18.5647	19.8894	19.6498	-0.412215	0.00723127	0.0597535
HERVP71A_12p13.33b	63.1946	94.5274	88.0025	111.09	-0.634983	0.00723987	0.0597535
HERVL74_19p13.2a	110.758	74.2995	145.695	93.9287	-0.412214	0.00726191	0.0598196
HERVL40_4q32.3b	21.293	63.0292	12.9809	41.9122	0.511549	0.00728912	0.0599281
HERVL_13q33.3	337.944	766.972	173.169	703.7	0.89673	0.00734698	0.0602877
HERVH_1q24.2	166.792	140.118	298.629	697.808	-0.515425	0.00738682	0.0604982
ERV316A3_9q34.3b	398.616	803.391	621.336	1094.14	-0.941946	0.0074518	0.0607133
HERVIP10FH_1q23.1	67.8524	97.0702	94.2006	104.107	-0.476461	0.00745442	0.0607133
ERV316A3_6p22.1n	1249.01	2035.55	1764.8	3347.32	-0.569697	0.00745577	0.0607133
HARLEQUIN_5q12.3	474.467	1854.42	55.769	178.798	0.792649	0.0074812	0.0608044
ERVLB4_2q14.2a	13.3455	40.2658	8.14262	23.0593	0.455698	0.00751277	0.0608543
HML5_11q12.2	38.9239	87.1871	182.994	604.006	-0.77374	0.00754708	0.0608543
MER4_4p16.1a	6.41315	20.7461	14.2017	101.965	0.420383	0.00755624	0.0608543
HERVH_7q31.1c	99.8693	609.287	13.1614	47.5692	0.589257	0.00755625	0.0608543
MER4B_4p16.1a	7.42442	25.5584	15.4205	108.89	0.418949	0.00755866	0.0608543
PRIMA41_1p36.13d	11.2089	38.0265	8.0075	40.9866	0.438318	0.00758249	0.0608558
MER4_Xp22.11b	23.8155	114.608	10.7305	50.722	0.482528	0.00758737	0.0608558
ERVLB4_12q13.12a	18.2856	25.6136	11.9759	14.9576	0.423585	0.00786089	0.0629314
HERVI_12q24.32	12.5973	68.6633	6.97742	28.5793	0.423082	0.00791499	0.0632458
HERVH_9q21.33f	508.756	3111.31	78.0303	715.724	0.70589	0.00795818	0.0633335
ERVLB4_21q22.12	5.82808	14.141	4.46014	11.0868	0.371075	0.00797686	0.0633335
HUERSP2_21q21.1b	6.73818	19.669	4.91932	17.1853	0.393286	0.00798137	0.0633335
ERVLB4_9q12	0.11522	1.19185	18.8639	219.179	0.274915	0.00798533	0.0633335
MER4B_12p13.31c	925.261	1398.34	1392.51	1943.6	-0.549599	0.00804311	0.0636734
ERVLE_8q24.3h	1115.3	1143.17	720.234	700.465	0.462571	0.00808552	0.0638905
HERVH_3q22.1e	12.4337	21.9654	27.5137	51.0533	-0.487003	0.00812385	0.0640748
HERVH_5q31.1f	5.27534	16.2135	5.65284	34.54	0.357423	0.00819485	0.0644411
HERVIP10FH_6q22.1	79.876	58.5575	110.986	86.2279	-0.415305	0.0082005	0.0644411
HERVH_12p12.2a	27.9228	91.2184	21.9509	87.3913	0.566848	0.00832369	0.0651957
HERVL74_7q21.3a	9.34549	18.7383	6.72621	14.642	0.424296	0.00832708	0.0651957
MER4B_2q21.2	16.8384	22.7863	24.6812	24.7868	-0.424019	0.00843194	0.0656054
ERV316A3_6q14.1a	8.92547	15.1876	6.31801	12.2765	0.397029	0.00844508	0.0656054
ERVLB4_15q23a	78.9995	153.321	39.4796	46.2768	0.53768	0.00844755	0.0656054
HERVL_6q24.1g	17.8879	45.5755	14.6612	59.8472	0.511353	0.0084603	0.0656054
HERVH_2p24.3a	45.034	115.886	104.07	695.377	0.621232	0.00848842	0.0656054
HERVH_19p12a	47.1848	72.6846	75.1567	139.429	-0.628049	0.0084965	0.0656054
HERVH_7q21.3b	73.6925	129.697	36.7524	69.0414	0.721942	0.0085039	0.0656054
HERVH_14q11.2a	258.21	263.48	388.339	488.805	-0.476674	0.00850591	0.0656054
HERVH_2q35a	9.24305	16.771	8.26248	21.781	0.410319	0.00851778	0.0656054
HERVL40_Xp11.23b	6.11727	9.03644	5.1033	7.88328	0.334251	0.00854359	0.0656405
MER41_17q11.1	2.42208	14.935	8.6568	85.1567	0.316014	0.00856556	0.0656405
ERVLB4_7q36.1a	27.0706	27.9849	41.0032	38.4223	-0.441586	0.00857573	0.0656405
LTR19_9q34.11	19.3122	44.3045	11.5807	21.8322	0.449489	0.00858838	0.0656405
MER4_6p22.3d	63.3819	78.525	90.0655	103.441	-0.540559	0.00860332	0.0656405
HML3_3q13.11b	41.7649	111.132	102.809	554.433	-0.644219	0.00861885	0.0656405
LTR23_4p16.3a	8.74083	22.7106	7.53264	18.9385	0.414682	0.00863002	0.0656405
MER41_3p12.2	5.95281	9.15394	5.02188	8.40559	0.346093	0.00866322	0.0657757
ERVLB4_10q11.21	2.60159	23.3573	13.366	150.606	0.296848	0.0087001	0.0659384
HML3_4q13.3b	30.9096	38.5647	46.5435	65.1662	-0.487882	0.00872708	0.0660256
HERVW_12p13.31b	38.1279	128.2	12.6815	26.7324	0.507341	0.00877241	0.0660834
HERV3_4q26	12.8266	126.59	1.37705	6.21322	0.3065	0.00877562	0.0660834
ERVLE_4p16.1c	24.8127	30.8173	17.1841	20.2761	0.454542	0.00879105	0.0660834
MER4B_Xq21.1e	10.2038	35.3432	11.0992	64.6142	0.433055	0.00879666	0.0660834
HML3_13q12.11a	724.822	1371.58	414.152	721.73	0.608192	0.00886857	0.0665036
MER61_Yp11.2d	7.66132	27.2718	5.71755	27.1237	0.40117	0.00888377	0.0665036
MER4_Yp11.2f	68.6535	142.741	36.6676	93.6965	0.728734	0.0088995	0.0665047
ERV316A3_4p15.1k	8.64622	35.3596	9.31796	40.3954	0.416091	0.00896335	0.0668221
HARLEQUIN_1q21.2	7.77788	15.1975	6.23823	12.8701	0.379091	0.00898869	0.0668221
HUERSP3B_7p13	32.181	28.6918	41.0324	26.2475	-0.370702	0.00898896	0.0668221
ERV316A3_8q24.3j	8.19772	14.4155	7.06993	13.8536	0.364605	0.00902008	0.0669368
HERVL_6q23.2b	12.1867	37.2214	10.4003	50.9176	0.452656	0.00904317	0.0669917
LTR25_3q26.33a	17.5331	49.616	20.6721	112.305	0.505761	0.00906825	0.067061
HERV9_4p14	35.099	46.8296	49.0537	57.4217	-0.49836	0.00909279	0.0671211
HERVL_10p13b	65.2263	65.8212	48.772	38.2065	0.411729	0.00911133	0.0671211
MER41_6q26a	6.24542	22.401	6.85233	44.0243	0.376489	0.00915816	0.0671211
MER4_17q21.33b	5.63242	10.1159	7.6657	38.8787	0.371332	0.0091783	0.0671211
HERVL_12q21.2c	225.878	544.741	280.732	368.93	-0.655315	0.00918601	0.0671211
HERVH_6p21.32	172.141	424.924	220.523	386.214	-0.733022	0.0091884	0.0671211
MER61_10q26.12	113.773	343.999	186.902	388.175	-0.79892	0.00919705	0.0671211
LTR25_9q22.2	8.85088	11.2587	7.35773	10.8008	0.361393	0.00920221	0.0671211
HERVH_3q27.2	129.388	158.292	167.974	150.877	-0.486247	0.00922204	0.067151
HERVFRD_9q22.31	30.047	37.773	37.3559	31.0112	-0.423734	0.00924619	0.0672121
ERVLE_14q31.3h	6.82846	19.0658	4.21706	7.53966	0.348569	0.00929144	0.0674261
ERVLE_7q21.2	47.9279	44.3523	62.0453	46.9082	-0.396246	0.00932341	0.0675433
HERVH_18q22.3a	1438.12	7903.43	289.004	3138.94	0.730265	0.00935914	0.0676872
HUERSP3B_2q35	22.9003	40.0874	19.2951	39.1015	0.481714	0.00942042	0.0678947
HERVH_10q22.3b	57.0677	65.9915	83.7956	107.024	-0.518891	0.00942922	0.0678947
HERVW_13q21.33	35.5583	175.065	37.6315	210.627	0.570779	0.00943556	0.0678947
HERVL_Xq22.3b	264.072	171.444	327.452	195.904	-0.346168	0.00953119	0.0684673
ERVL_4q22.1	6.4748	19.1832	5.19529	17.012	0.388792	0.0096021	0.0687396
LTR25_11q24.3b	48.6265	99.7976	26.34	44.6448	0.572458	0.00961458	0.0687396
HML6_11q12.3a	12.056	85.679	3.35287	12.2832	0.354257	0.00961743	0.0687396
HML3_3q26.1a	9.83627	36.7752	36.3198	171.05	-0.480006	0.00967268	0.0689262
HML1_11q12.1	256.535	360.585	185.417	293.244	0.447751	0.00967584	0.0689262
HML6_Xp11.22	743.213	476.125	900.027	513.645	-0.431409	0.00970551	0.0690223
ERV316A3_4q26g	7.9942	56.1984	6.37524	33.1353	0.371781	0.00976519	0.0693313
PABLA_5p14.1	6.43042	18.4099	6.92685	27.072	0.38515	0.0098833	0.0700532
ERVLE_15q26.3b	89.078	63.9747	107.443	62.8123	-0.353652	0.00995537	0.0704471
MER41_13q34b	22.5344	115.553	8.88851	13.2302	0.418514	0.00999539	0.0706132
HERVH_10q23.32	25.2136	52.7986	15.5196	30.2591	0.519493	0.0100241	0.0706992
PABLB_1q31.3a	300.155	432.44	363.849	384.038	-0.515365	0.0101048	0.0708027
HERVH_2p11.2c	39.1114	118.298	47.1802	88.0902	-0.614853	0.0101058	0.0708027
MER4_2q14.1a	25.8623	33.7558	18.1706	26.5582	0.43949	0.0101264	0.0708027
HERVL_9q13a	579.4	1625.18	200.588	893.14	1.00086	0.0101291	0.0708027
HERV9_8p12	9.18296	38.1056	4.28552	17.9272	0.378251	0.0101401	0.0708027
PRIMA41_19p12a	2.8814	14.5005	10.5592	102.38	0.328793	0.0101403	0.0708027
HERVW_7p14.1	61.9661	317.667	29.5218	205.133	0.512775	0.010155	0.0708027
HERV3_16p13.3	180.738	88.7217	228.453	140.167	-0.281868	0.0102168	0.0710945
HERVH_4p16.1a	263.218	195.684	340.166	244.633	-0.422062	0.0102301	0.0710945
MER41_11p15.5b	58.1164	126.238	40.5584	107.166	0.674449	0.0102958	0.0714343
HERVL40_16p11.2	10.6803	55.9229	6.48379	30.4711	0.395316	0.0103285	0.071545
HERV30_3p12.2	20.5766	72.0181	10.3999	55.7282	0.481412	0.0103528	0.0715973
HERVH_9q21.33c	72.7996	68.3071	96.4494	77.8134	-0.452836	0.0104518	0.0721647
ERVLB4_3q25.2c	7.06865	32.4987	3.58688	10.3212	0.358036	0.0105327	0.0724061
MER41_11p15.5a	8.65186	22.0603	5.37031	13.9118	0.397601	0.0105386	0.0724061
HERVE_8p23.1c	13.8124	60.4035	7.8009	39.8721	0.420596	0.0105434	0.0724061
ERVLE_8q21.3f	33.804	33.9883	45.9323	42.7756	-0.42596	0.0105546	0.0724061
HERV4_1q31.1	13.3213	133.097	1.58855	8.41935	0.296518	0.0106048	0.0725708
ERVLB4_14q23.3	56.8814	113.603	67.303	58.1074	-0.463245	0.010628	0.0725708
HML2_4p16.1b	197.844	407.946	233.942	263.79	-0.583726	0.0106397	0.0725708
MER4B_21q22.11	10.4542	14.6404	17.802	21.2007	-0.393551	0.0106561	0.0725708
ERVLB4_8q24.3d	10887.9	7842.48	7800.01	6204.87	0.391122	0.0106788	0.0725708
HERVH_8q21.3b	279.51	1613.36	381.804	3775.61	0.71017	0.0106923	0.0725708
ERV316A3_5p14.3e	8.35578	41.7444	12.0593	86.6112	0.374801	0.0106977	0.0725708
HERVW_7q31.1b	9.20805	19.6974	10.1578	35.022	0.402858	0.0107968	0.07311
HML1_15q21.2	183.982	271.335	99.2424	182.053	0.851773	0.0108114	0.07311
HERVE_19p13.2	1429.93	762.105	1734.63	783.143	-0.284268	0.01095	0.0739295
HERVE_8p23.1h	189.226	317.119	326.274	509.155	-0.678741	0.0110538	0.0745125
ERVLB4_19q13.31c	15.0648	16.9101	10.9227	11.9023	0.366358	0.01109	0.0746389
HUERSP1_9q22.33	58.4552	79.1875	93.6009	164.607	-0.491398	0.0111957	0.0752317
HERVH_1q42.13e	14.2963	55.2781	8.70961	33.3918	0.406143	0.0113191	0.0759072
MER34B_1q23.3b	1917	1974.68	2573.89	2267.57	-0.562123	0.0113318	0.0759072
HERV9_7p14.2	27.958	31.7591	41.9498	42.9449	-0.465775	0.0113693	0.0760392
ERV316A3_3q27.1a	69.0885	98.6763	96.9921	119.095	-0.557363	0.0114089	0.0761844
HERVI_11q22.3	4.2516	21.8238	8.81684	79.1973	0.342455	0.0114394	0.076269
HML2_4p16.3b	12.7648	26.9876	8.19886	23.2365	0.429243	0.0115509	0.0768917
ERVLE_13q21.33b	6.4211	25.1857	7.51165	33.5443	0.388626	0.0115795	0.0769624
MER4_Xq24d	39.4826	26.961	51.4729	32.0978	-0.328405	0.0116049	0.0770108
HERVH_Xq23b	4.33463	16.9036	8.15952	61.113	0.346686	0.0116352	0.0770925
HARLEQUIN_12p12.2	16.78	65.8875	13.0182	66.5363	0.459713	0.0117164	0.0774009
MER61_6q24.1c	7.0867	16.1322	5.45346	13.686	0.363803	0.0117409	0.0774009
PABLA_14q12	0.383281	2.79469	21.3432	247.986	0.286435	0.011749	0.0774009
ERV316A3_16q23.1a	21.0481	27.7892	16.0081	25.3091	0.451409	0.0117543	0.0774009
MER4_14q32.31a	5.64365	12.0039	4.53952	9.6879	0.330696	0.0118635	0.0778747
HERVH_2p11.2b	3.16733	21.2647	7.49255	62.0265	0.304892	0.0118682	0.0778747
HERVH_2p12c	17.4842	77.4615	6.6045	25.2486	0.421435	0.0118811	0.0778747
HML5_8p12	10.3309	19.4383	7.45112	14.5713	0.382437	0.0119622	0.078286
HERV4_16q11.2	31.566	273.441	9.52497	57.3359	0.390843	0.0120666	0.0788485
HERVH_7q31.1b	59.5546	288.513	44.1476	336.749	0.511397	0.012093	0.0789002
HERVH_6q23.1	44.0559	48.9207	71.5648	79.834	-0.509861	0.0122248	0.0796385
HUERSP1_8q21.13	42.3121	161.307	19.3175	77.7059	0.541718	0.0122575	0.0797296
HUERSP3B_11p12	34.0402	37.9391	51.1141	49.1675	-0.425744	0.0123202	0.0799642
HERVK11_9q32	69.0435	52.2618	90.0783	87.8101	-0.349405	0.012331	0.0799642
PRIMA41_20q11.1c	13.6037	81.0502	9.94315	71.5834	0.373736	0.0123868	0.0802042
LTR46_5q33.1	22.7134	51.9883	12.528	23.1065	0.445275	0.0124606	0.0805595
HERVH_Yq11.222c	15.089	30.6855	10.1209	20.4594	0.462299	0.0125053	0.0807263
HERVP71A_10q25.1	22.1732	44.2382	22.2771	80.9408	0.505312	0.0125605	0.0809604
HUERSP3B_Xp11.22	1754.11	978.59	2032.4	929.057	-0.309479	0.0126065	0.0810651
HERVL_5p15.2a	8.96933	12.1021	7.80954	12.3185	0.356995	0.0126166	0.0810651
ERVLE_1p36.12	156.849	128.755	113.444	81.2964	0.391971	0.0126338	0.0810651
HML3_8q24.3	59.8003	48.4948	72.7845	52.9419	-0.379233	0.0127999	0.0820078
HERVL40_19q13.2	93.0849	107	109.993	91.6952	-0.359295	0.0128281	0.0820651
HERVL_9q22.32	788.896	2081.58	324.995	930.811	1.0306	0.0128762	0.082127
MER34B_22q13.31	638.561	531.704	776.683	522.022	-0.347016	0.0128763	0.082127
HERVH_11q21c	10.6578	21.2693	6.73665	10.9015	0.382538	0.0129332	0.0821324
HML3_1p36.33	12.6957	28.8266	8.13974	14.8106	0.390676	0.0129332	0.0821324
HERVH48_21q22.3	5830.23	24533.3	823.918	3482.08	0.680063	0.0129496	0.0821324
HUERSP3B_9p13.3a	36.3312	41.2356	59.4452	110.585	-0.447538	0.0129545	0.0821324
ERVLE_11q22.3l	11.3861	37.7992	6.39876	18.2815	0.39366	0.0129733	0.0821324
HERVH_8q21.2a	20.9062	163.364	15.0062	123.622	0.387967	0.0131333	0.0829315
PABLA_Xp11.23	9.45667	11.9644	15.1185	14.9213	-0.341268	0.0131384	0.0829315
HERVL_5p14.3a	8.53834	73.4892	2.51537	12.9281	0.302147	0.0131995	0.0831937
PRIMA41_Yq11.222b	5.3803	35.8118	5.97279	46.482	0.331921	0.0132194	0.0831965
HERVL_8q12.3b	5.50836	8.82052	4.74498	7.9428	0.325975	0.0132571	0.0833111
MER61_1q42.12	110.909	190.812	129.103	177.104	-0.469495	0.0132894	0.0833908
HERVL_6q14.2	7.19668	22.0129	4.18591	8.75602	0.336002	0.0133464	0.0836256
ERV316A3_5q35.3a	26.4892	45.0401	38.3432	44.4395	-0.518433	0.0133726	0.0836618
HML6_17q21.31	6.42754	12.0254	4.98472	9.49003	0.338454	0.0134096	0.0836618
ERVLE_15q25.1f	137.228	151.304	231.263	508.523	-0.47208	0.013411	0.0836618
HML1_3q21.3	481.996	333.849	661.532	626.796	-0.360921	0.013445	0.0837515
HERVE_3p26.3	96.091	141.287	121.5	137.716	-0.476555	0.0135096	0.0838771
ERVLB4_15q13.2c	8.5883	14.2088	6.47666	11.1214	0.373647	0.0135242	0.0838771
HERVH48_19p12b	950.419	759.731	1128.66	1028.52	-0.340627	0.013531	0.0838771
LTR19_19p13.2b	170.389	434.505	160.162	110.093	-0.405183	0.0135438	0.0838771
ERV316A3_5p14.1c	24.5992	91.6281	9.18682	56.1609	0.452378	0.0135922	0.0840079
ERV316A3_1p21.3a	15.4972	20.5483	11.8129	15.8215	0.415308	0.0136043	0.0840079
HERVL_17p11.2a	7.54467	28.5991	4.92795	23.0879	0.373713	0.0137342	0.0846878
ERVLB4_Xq21.2	17.2983	56.1597	15.107	50.5513	0.473283	0.0138452	0.0852486
PRIMA41_8q24.13	10.181	77.7431	2.9363	6.5069	0.320875	0.013869	0.0852722
HML3_Xp11.21	29.9275	27.4461	42.6757	41.3946	-0.405459	0.01391	0.0854011
LTR19_17q21.32	93.3542	482.316	12.9589	38.9329	0.565869	0.0140353	0.0859485
HERVL_4q32.1a	653.782	429.395	869.161	651.6	-0.348845	0.0140394	0.0859485
HERVL74_6p25.2	10.5397	16.5037	8.48331	20.602	0.383995	0.01411	0.0862572
HERVS71_11p15.4	44.9239	50.1396	65.9877	70.0808	-0.48955	0.0141562	0.0864154
ERVLE_8q11.23b	468.288	242.961	399.084	229.239	0.255262	0.0142725	0.0870013
ERV316A3_13q14.3a	6.08123	12.2017	4.75153	9.62972	0.34185	0.0143236	0.0871878
ERVLE_22q13.2b	8.11538	14.1558	16.7107	27.7942	-0.37887	0.0143627	0.0873013
HERVIP10F_13q11	18.5787	102.142	35.6896	353.411	0.438141	0.0144714	0.0878371
MER41_Xq26.2a	7.6118	15.1861	6.50452	13.1414	0.355261	0.0146684	0.0889063
MER4_3q29b	315.337	253.457	448.491	426.553	-0.435749	0.0147814	0.0894641
ERV316A3_5q13.2a	8.39651	20.5503	6.08992	13.6716	0.387191	0.014923	0.0901091
HERVH_7p21.1b	47.1003	69.2753	58.9316	78.5248	-0.518316	0.0149302	0.0901091
HERVH_5p15.33	381.486	546.33	633.354	871.994	-0.716432	0.0149537	0.0901235
HERVH_9p21.3a	153.886	337.028	84.2228	299.123	0.755173	0.0150504	0.0905785
ERVL_14q22.1	26.4612	36.5957	40.3654	48.7762	-0.482351	0.0151667	0.0911126
ERV316A3_2p16.1a	231.282	136.25	268.627	125.863	-0.268912	0.0151819	0.0911126
HERVL_10q26.13a	6.13536	14.4586	10.9749	77.9593	0.366053	0.0152799	0.0915723
HERVI_22q13.2	123.352	923.141	196.396	1181.58	-0.577582	0.0153718	0.0919938
HUERSP1_19q13.2b	8.40918	21.9009	6.18632	13.1346	0.362818	0.0154723	0.0924654
HUERSP3B_11q14.3	8.56736	25.707	9.57171	50.4741	0.374632	0.0155208	0.0926254
HERVH_5p14.3a	150.742	1117.4	63.2032	366.429	0.63064	0.0155443	0.0926362
ERVLE_11p15.4e	35.7171	44.9615	49.4119	51.1871	-0.422241	0.0156518	0.093147
HML2_3p12.3	96.9133	208.873	130.324	246.871	-0.621281	0.0157476	0.0935328
ERVLE_5q11.1	8.84621	18.0991	6.45318	14.0511	0.36781	0.0157899	0.0935328
MER4B_1p36.33	404.986	568.446	497.202	412.647	-0.363133	0.0158648	0.0935328
MER4B_19q13.42b	22.4674	29.4571	31.4689	33.0786	-0.431844	0.0158678	0.0935328
ERVLB4_2q37.3a	5.6987	10.4159	4.92563	9.73109	0.322727	0.0158797	0.0935328
HARLEQUIN_4q13.3	28.7004	119.84	16.6683	78.4376	0.482807	0.0158957	0.0935328
HERVH_4q32.1d	5.75572	15.8095	4.40348	13.2162	0.333333	0.0159091	0.0935328
HUERSP3B_1q24.2	107.69	68.1234	130.835	79.5115	-0.299709	0.0159241	0.0935328
ERV316A3_13q31.1d	19.5813	81.5759	8.24198	43.4676	0.42996	0.0159307	0.0935328
HERV4_3p12.3	40.1904	224.813	12.405	35.1771	0.487073	0.0159359	0.0935328
ERV316A3_8q22.1d	7.76211	18.8177	5.73975	15.6812	0.358209	0.0161005	0.0943691
HERVH_4p15.2a	8.44488	20.9865	8.15285	30.913	0.374246	0.0162839	0.0953135
MER41_10q11.23	20.9588	91.8809	11.2333	47.193	0.446569	0.0163507	0.095573
HERVH_12p12.1b	11.4907	18.1719	22.5221	31.5644	-0.402954	0.0165239	0.0964532
HML5_2q31.1b	7.75038	11.5535	6.55242	11.1294	0.339654	0.0165803	0.0966507
MER4_Xq11.1a	0	0	22.0468	255.76	0.246844	0.0166412	0.096873
MER101_10q11.22d	21.3663	65.2448	14.2659	47.4087	0.444628	0.0166928	0.0970413
HERVIP10F_18p11.21b	37.1838	236.685	12.8213	64.9598	0.448478	0.0167596	0.097084
HERVS71_18q21.1	53.0848	106.69	72.8952	449.191	0.574636	0.0167693	0.097084
HERVIP10FH_4q28.3	28.7769	139.216	16.196	71.1363	0.460814	0.0167736	0.097084
HERVL_11q12.2	37.0435	55.6012	59.6049	101.822	-0.480917	0.0167912	0.097084
HERVL40_22q13.2	40.1783	34.3714	52.7536	39.7784	-0.374466	0.0169553	0.0979005
HERVFC1_7q36.2	458.191	2304.1	403.571	2720.35	0.73262	0.0170197	0.0981392
MER101_19q13.2c	45.3838	176.715	43.3021	53.631	-0.489484	0.0171246	0.0984799
HERVH_13q13.3a	331.253	290.931	374.181	237.927	-0.410861	0.0171249	0.0984799
HERVL_3q21.2	71.5709	63.677	57.7383	51.1919	0.366101	0.0171964	0.0987578
HERVE_4p16.1c	435.449	658.032	720.132	1592.19	-0.748663	0.0172579	0.0989776
HARLEQUIN_4q22.1a	14.6638	111.634	7.02416	37.1299	0.353653	0.0173379	0.0993033
PABLA_2p25.1	360.866	426.181	279.23	369.523	0.49675	0.0175319	0.10028
ERV316A3_2p25.1a	72.0642	132.105	83.8013	80.4865	-0.446542	0.0175577	0.100293
ERVLE_2q36.3b	8.82107	22.3559	7.15464	18.0769	0.364587	0.0175838	0.100308
HERVL18_7q21.11a	21.5804	54.819	14.0071	43.161	0.46646	0.0176095	0.10032
HERVH_2q32.3c	11.2372	55.9109	6.69211	42.1737	0.354968	0.0176707	0.100534
ERVLB4_2q37.3b	1070.14	1512.13	652.382	441.339	0.364642	0.0177634	0.100927
HERV9_10q21.1b	20.2783	64.5578	13.8191	62.5766	0.451058	0.0178545	0.10131
HERV30_3q26.1	14.3944	40.7017	13.2888	53.1222	0.445763	0.0179346	0.10163
HERVFRD_21q22.3	48.7549	66.8947	54.0697	45.1541	-0.450726	0.018013	0.101938
ERVLE_15q25.3b	8211.74	7492.67	6133.61	7051.67	0.495169	0.0180941	0.102154
HERVW_3q28	6.03979	24.6473	6.04762	32.6741	0.337635	0.018099	0.102154
HERVH_4q22.1h	73.9921	502.533	17.8188	38.9918	0.521515	0.0181757	0.102359
HERVL_Xq13.1	7.4115	14.0419	6.40464	13.3972	0.337402	0.0181832	0.102359
ERV316A3_17q24.3a	9.1699	13.8812	13.8138	13.0095	-0.334199	0.0182546	0.102625
HUERSP3_6q22.31	416.636	3427.29	738.745	6158.7	-0.638571	0.0183256	0.102888
HML3_19q13.41b	48.1837	60.6151	64.7917	77.0753	-0.425162	0.0183604	0.102948
HERVH_8q23.3e	4.73173	11.6878	6.35819	28.6092	0.335369	0.0183891	0.102974
HML3_4q28.1b	11.7597	29.6319	9.46944	37.4889	0.403087	0.01848	0.103168
HERVH_Xq22.2b	12.5224	19.0433	19.8012	30.8705	-0.382185	0.0184816	0.103168
HERVW_Xq22.3c	514.511	516.64	636.432	567.837	-0.414049	0.0184962	0.103168
MER41_6q22.31b	13.4321	14.301	21.4364	20.1349	-0.346871	0.018718	0.104238
HERVL_Xq21.33c	7.29919	22.1273	4.24911	9.22785	0.331821	0.0187567	0.104238
HERVK11_1p13.3	219.697	282.132	254.252	261.22	-0.536169	0.0187614	0.104238
HERVS71_10q21.1	8.58399	22.9999	12.7149	58.0181	0.389474	0.0189084	0.104898
MER4_15q21.2a	22.6659	50.0673	13.0835	28.3269	0.447269	0.0189293	0.104898
MER4B_14q13.1	18.2606	31.6671	14.0756	33.3231	0.409019	0.0189584	0.104923
ERVLB4_11p15.5e	201.433	588.358	424.125	1447.97	-0.638804	0.0190418	0.105113
ERV316A3_21q21.1g	5.61314	15.9508	5.32465	18.2333	0.33191	0.019042	0.105113
HERVS71_3q21.2	74.423	62.3798	100.375	76.9598	-0.42057	0.0191717	0.105692
MER101_16p11.2b	31.7008	35.918	43.0099	38.3043	-0.416981	0.0192228	0.105837
MER4_10q11.22b	39.5952	49.9813	76.0297	93.9974	-0.571236	0.0192749	0.105987
HERVL18_Xq24	16.3032	76.5784	16.1223	16.1329	-0.352601	0.0193745	0.106398
HERVW_11q14.2	29.458	34.884	21.9677	29.982	0.421003	0.0194422	0.106523
HERVIP10FH_6q15a	28.3505	32.4575	36.9933	33.0846	-0.378182	0.0194473	0.106523
HERVH_4q28.1a	9.0984	54.028	3.43776	7.29561	0.318176	0.0195034	0.106693
MER61_4q26a	17.9413	64.8874	14.7305	70.8246	0.420558	0.0195317	0.106711
MER41_9q31.1c	99.626	182.626	180.313	393.31	-0.56974	0.0196985	0.107269
ERVLE_3q26.32b	21.9937	34.4049	19.0625	49.2973	0.447208	0.0197066	0.107269
HERVL_1p22.2b	20.1739	29.698	15.96	27.6546	0.449378	0.0197091	0.107269
MER34B_4q31.3	515.392	596.698	687.312	732.869	-0.458513	0.0197935	0.107591
ERVLE_4p12e	17.5487	18.9363	27.2182	29.1635	-0.372585	0.019855	0.107788
MER4_Xq13.1	15.214	21.3315	12.6015	18.7167	0.3732	0.0198913	0.107848
ERVLB4_9q31.3	34.0716	100.406	16.2584	22.8166	0.456301	0.0200973	0.108826
HERVIP10F_22q11.1	59.7177	413.358	15.9939	93.9519	0.459437	0.0201287	0.108858
MER61_17q22b	13.9129	53.3997	5.47925	21.3608	0.380837	0.020211	0.109165
HML1_11q23.3	3.66783	11.6406	7.72809	57.4507	0.305282	0.0203586	0.109823
MER4B_11q22.3b	20.8179	25.7936	29.5837	27.7277	-0.404206	0.0204414	0.110076
MER41_14q21.2a	11.0757	67.5521	5.36795	21.2982	0.345594	0.0204757	0.110076
HERVH_2p13.3b	1.2271	4.66292	12.2962	131.546	0.281398	0.0205036	0.110076
HERVH_2q14.1c	6.9811	24.0482	4.49439	16.4004	0.332876	0.0205087	0.110076
HUERSP1_2q35	8.50281	19.4924	6.46774	13.1582	0.345758	0.0206066	0.110463
HML2_4q32.3	11.0961	27.1685	6.3029	12.7975	0.367318	0.0206997	0.110822
HERVIP10FH_3p26.1a	24.01	84.05	18.1407	80.0333	0.470067	0.0208032	0.111237
ERV316A3_16p12.1	28.589	61.1854	33.3229	45.6081	-0.443302	0.0210412	0.112073
HARLEQUIN_2q34	23.5134	30.5503	35.2217	37.4036	-0.425642	0.021058	0.112073
HUERSP1_6p21.1	86.5005	63.7013	105.442	69.0813	-0.334687	0.0210645	0.112073
HERVH_3q26.31a	6.59132	36.5259	6.86163	42.5255	0.34305	0.0211093	0.112073
ERVLE_7q32.2a	5.80354	9.00126	5.88623	13.0164	0.303314	0.0211147	0.112073
MER4_7q33a	22.3069	66.5805	12.0689	30.2235	0.451413	0.0211171	0.112073
HML3_19p13.2c	262.975	150.942	307.725	152.139	-0.272971	0.0211611	0.112167
LTR46_8q24.3	416.438	323.897	496.326	330.746	-0.330511	0.0212721	0.112523
HUERSP3_11p15.1	1550	1769.91	1101.34	1386.2	0.402532	0.021281	0.112523
PABLA_Xq21.31b	32.9326	108.168	18.8786	49.9156	0.511524	0.021317	0.112554
MER101_6p21.1	5.73961	11.2123	4.42383	7.63582	0.294745	0.0213396	0.112554
ERVLB4_2q11.1a	79.4914	77.081	99.3773	78.6257	-0.345489	0.0214741	0.113124
ERV316A3_4q13.3a	17.8499	101.953	7.07295	28.335	0.391289	0.0216574	0.113912
ERV316A3_3q13.13d	16.1178	87.6047	14.0343	84.2581	0.416555	0.0216771	0.113912
HERVH_11q23.3b	283.55	510.134	351.238	665.04	-0.677848	0.0217816	0.11432
HERVH_8q22.3a	59.8934	73.2858	71.9945	84.8139	-0.399314	0.02181	0.114328
HERVW_2q24.3	36.23	36.4666	45.6829	39.2536	-0.382885	0.0219121	0.114722
HERVH_19p13.3a	47.3577	298.369	7.50524	16.7572	0.404322	0.0219449	0.114753
MER4_9q22.33	8.23341	19.9587	4.90499	8.97299	0.336238	0.0219775	0.114783
ERVLE_12q24.23	26.5745	32.642	19.456	25.77	0.420567	0.0220224	0.114877
MER61_16p12.3	21.0029	33.5274	28.6202	35.2028	-0.406928	0.0220584	0.114925
HERVH_5q13.3a	16.2236	111.714	5.71841	30.8058	0.354802	0.0221135	0.115071
ERVLE_15q25.2	5.83373	14.6837	5.01576	15.6497	0.321608	0.0221409	0.115074
ERVLE_2p23.3a	18.0425	18.7397	25.0123	22.3403	-0.331349	0.022215	0.115318
HERVH_12p12.2b	198.788	607.597	102.134	398.452	0.742019	0.0223065	0.115652
ERV316A3_6p22.1h	5.79724	11.8103	5.34823	10.2669	0.313517	0.0223899	0.115791
HERVH_4p16.1b	65.2522	139.011	113.19	352.545	-0.605754	0.0224269	0.115791
HERVEA_1q31.1	37.0305	167.447	13.1472	30.84	0.456555	0.0224385	0.115791
ERVLE_13q11	153.391	143.532	106.992	108.251	0.533091	0.0224418	0.115791
HERVH_4q22.1c	10.0411	37.2084	7.40081	25.7783	0.351232	0.0225724	0.116163
HERVH_5q35.1b	28.5723	33.7052	44.7497	49.2172	-0.415486	0.0226013	0.116163
HERV9_14q21.3	53.0595	200.791	30.5364	124.172	0.529342	0.0226153	0.116163
HML3_1p21.3	98.0348	130.727	108.976	90.9991	-0.384428	0.0226229	0.116163
HERVIP10F_16p13.13	121.566	153.519	157.931	198.273	-0.477711	0.022679	0.116312
HUERSP2_11q22.1c	11.5783	46.619	22.9444	45.293	-0.416947	0.0227882	0.116731
HERVEA_19p12a	56.4041	111.051	109.685	416.857	-0.604854	0.0228703	0.117011
ERV316A3_12q21.33f	4.6031	13.3036	5.8521	25.4697	0.303972	0.0229006	0.117026
ERVLE_22q13.2e	26.1874	25.4822	19.0123	19.7698	0.394629	0.0229432	0.117104
HERVL_2q33.3	20.1863	49.5813	39.0416	84.3753	-0.454139	0.0229798	0.11715
HML2_19p13.3	49.1788	377.076	9.67498	26.1037	0.433537	0.023111	0.117593
MER4B_2p15	51.2165	84.2844	54.9294	48.3479	-0.408	0.0231471	0.117593
MER4_3q29c	167.804	146.624	224.79	213.423	-0.422502	0.0231493	0.117593
PABLA_Yp11.2	31.0805	99.7945	35.1689	157.221	0.509492	0.0231889	0.117654
HERVL_15q21.3	7.153	20.112	5.01783	10.2261	0.322296	0.0233021	0.118088
HML1_6q23.2	552.448	476.053	420.582	287.848	0.331915	0.0237319	0.120123
HERVK11_17q11.2	14.8247	16.5023	11.3857	12.6129	0.356295	0.0237893	0.120271
MER41_3q13.13	7.34852	33.3203	7.09693	33.8293	0.337495	0.023877	0.12051
HERVH_3p22.3b	104.76	90.2074	140.07	113.781	-0.379184	0.023893	0.12051
HERVL_9p21.1b	5.13544	17.2213	8.68514	59.8638	0.324212	0.0239418	0.120613
HML6_5q13.2d	6.17936	29.5622	6.40981	42.5971	0.320961	0.0240273	0.120875
HUERSP3B_10q21.1b	8.66135	28.275	6.38921	19.8493	0.359446	0.0240609	0.120875
HERVH_20p12.1a	71.937	538.478	10.3437	56.9874	0.425599	0.0240787	0.120875
ERVLE_3q28b	13.0975	54.5344	7.87121	36.043	0.383538	0.0241735	0.121208
ERVLE_15q25.3a	19.7397	20.2302	28.0001	24.7435	-0.354784	0.0242818	0.121608
HERVL_2q32.1e	25.7491	36.5295	16.8359	17.5026	0.377646	0.0243657	0.121802
HERVH_6p22.3a	34.7791	55.4168	59.6804	125.231	-0.47123	0.0243775	0.121802
MER101_16p12.2b	25.789	253.444	4.51027	36.0077	0.297298	0.0245587	0.12256
HERVH_4q22.3c	0.0767377	0.793781	15.2208	175.006	0.234784	0.0246396	0.12256
ERVLE_1q42.12b	30.8149	29.0111	40.5619	35.0687	-0.339302	0.0246445	0.12256
PRIMA4_Xp11.22	6.16854	15.5966	10.5381	12.3123	-0.311987	0.0246691	0.12256
ERV316A3_8q23.1b	6.91445	19.6458	5.06841	11.6585	0.325565	0.0246729	0.12256
ERVLB4_20q13.12a	56.4154	51.1301	72.7488	62.9918	-0.384547	0.0247071	0.122588
HERVK11_15q15.1	3360.01	1798.64	3785.07	1654.32	-0.23978	0.0247495	0.122655
HERVH_11q21e	2.913	6.89876	8.96005	72.8463	0.290668	0.0248624	0.122989
MER4_13q32.3b	58.1207	61.2815	75.4653	67.321	-0.433152	0.0248745	0.122989
ERVLB4_22q11.22a	7.01567	12.7158	5.45583	9.14437	0.298452	0.0249789	0.123355
HUERSP1_19q13.2a	25.4694	28.1494	36.8271	35.6633	-0.400518	0.0250063	0.123355
MER4_5p14.3b	76.1828	194.892	35.4775	88.575	0.59728	0.0250803	0.123383
HERVH_2p14c	9.49581	28.4965	6.52948	15.1928	0.356871	0.0250957	0.123383
ERVLE_17q24.1	12.8615	21.9852	9.19608	14.8892	0.391712	0.0250988	0.123383
ERVLE_1q23.3a	97.9505	153.625	130.145	187.713	-0.467543	0.0252874	0.124167
HERVW_7q31.32	61.83	172.02	62.7534	70.3366	-0.46449	0.0253416	0.124239
HUERSP2_3q21.3	48.5257	65.0219	61.7147	71.2776	-0.459071	0.0253602	0.124239
ERV316A3_6p22.1a	14.4376	32.6336	11.3687	20.7428	0.374999	0.0255277	0.12486
MER41_4q21.21	7.92752	33.0941	4.99403	9.39965	0.30309	0.0255498	0.12486
ERVL_22q12.3b	39.7191	52.7545	52.7582	54.0882	-0.39718	0.0255763	0.12486
HERVFC1_7q11.21	1198.64	1379.27	1362.36	1063.47	-0.313489	0.0256408	0.12486
HERVP71A_4q31.21	107.574	65.3455	123.217	61.4122	-0.245841	0.0256542	0.12486
ERV316A3_2p25.3b	35.4105	31.9901	28.393	27.9442	0.341683	0.0256625	0.12486
MER4_3q25.1c	5.45981	18.7238	7.72573	50.6157	0.316554	0.0257509	0.125147
HERVK14C_15q21.1	18.0683	28.4012	27.5525	34.9756	-0.41666	0.0258453	0.125463
PABLB_14q11.2c	41.4632	89.3186	82.4746	355.735	-0.528445	0.0259204	0.125644
MER4_17q21.33a	4.51241	7.59652	7.24391	38.3269	0.271358	0.0259647	0.125644
PABLA_11q13.4	25.0045	121.34	14.8995	52.8753	0.413819	0.025971	0.125644
ERVLE_2q32.3c	5.99591	15.3513	6.59843	20.6926	0.333003	0.026142	0.126328
MER4_14q11.2c	16.9721	146.084	5.65365	27.7013	0.330377	0.0262076	0.12643
MER61_4q21.23a	37.744	76.6962	32.0271	74.0562	0.541059	0.0262406	0.12643
ERV316A3_4q24d	5.97532	15.9617	4.38601	11.124	0.313557	0.0262578	0.12643
HERVFRD_4p16.3	138.032	98.7807	154.478	90.0797	-0.302518	0.0262828	0.12643
HERVIP10F_11q13.3	43.716	391.004	4.28519	22.0434	0.321315	0.0263111	0.12643
MER4B_Xq26.2b	135.134	159.66	108.705	199.283	0.549595	0.0264622	0.12681
ERVLB4_4q25a	12.757	33.2623	7.08204	18.5901	0.37094	0.026477	0.12681
HARLEQUIN_3q26.1	15.7804	54.9756	9.87806	29.7072	0.400704	0.0264793	0.12681
HARLEQUIN_8q11.23b	10.9789	81.5168	3.96128	16.313	0.314861	0.0265805	0.126973
HERVH_6q16.1a	9.52469	46.398	6.54689	42.3713	0.333482	0.026609	0.126973
MER41_14q32.32	24.4261	25.7843	34.2647	30.5284	-0.367438	0.0266472	0.126973
HERVEA_21q22.11	173.214	272.271	185.959	201.717	-0.477336	0.0266609	0.126973
HERVH_3q28d	9.79592	27.4168	8.42883	28.1425	0.359154	0.0267258	0.126973
ERVLB4_7q36.3c	13.228	30.4939	8.13126	17.1925	0.363714	0.0267401	0.126973
ERVL_6q16.1d	25.6147	66.7771	21.6288	109.724	0.466442	0.0267487	0.126973
HERVW_2q22.2	10.6943	24.8373	20.0376	157.384	0.378739	0.0267692	0.126973
HERVIP10FH_7p14.1	45.6487	291.403	17.5437	87.2171	0.419912	0.0268372	0.126973
MER41_19p12b	17.7522	22.2601	28.0856	41.587	-0.367208	0.0268394	0.126973
HML1_5p14.1	16.5878	54.4653	9.59985	20.8685	0.370576	0.0268423	0.126973
HERVH_19p13.2c	263.257	140.957	302.407	141.096	-0.244468	0.0268941	0.126973
ERVLE_8q21.3c	4.98948	14.1761	5.01732	20.7248	0.300373	0.0269003	0.126973
MER41_Yq11.221a	6.74792	11.6345	6.24349	11.9893	0.330608	0.0269651	0.127138
MER4B_12q21.2	557.623	472.768	420.111	279.689	0.27347	0.0270155	0.127235
HERVH48_14q24.2	117.659	122.176	160.245	264.487	-0.354072	0.0271297	0.127632
ERV316A3_6p22.1g	7.70088	12.3432	7.66068	16.3496	0.330799	0.0272905	0.128247
HERVL_3q25.32	28.3931	38.2025	44.5613	59.0583	-0.440836	0.0273842	0.128546
HML3_4q22.3a	0.245988	2.54452	15.6524	179.275	0.237124	0.0274396	0.12861
ERVLE_11q22.3i	78.889	72.5774	55.3962	43.2189	0.350212	0.0274581	0.12861
LTR25_10p15.1a	8.09292	31.378	19.8272	173.576	0.342376	0.027572	0.129002
HERVEA_19p12b	119.061	892.419	89.0171	216.468	-0.58621	0.0276264	0.129115
HERV3_1q23.3	212.438	205.39	268.671	324.438	-0.321673	0.0276876	0.129218
HERVH_18q11.2	35.1187	45.2898	47.7172	43.9342	-0.415095	0.0277091	0.129218
ERVLE_12p13.32	15.0722	34.1845	9.85292	19.0584	0.375885	0.0278408	0.129691
ERVLE_5q22.1c	6.93529	18.9172	4.62237	9.98491	0.314603	0.0281039	0.130774
HERVH_7q31.32b	111.931	105.44	152.43	152.287	-0.439557	0.0281609	0.130896
HERVH_3q27.3c	369.275	1989.59	58.0883	145.846	0.663565	0.0282532	0.130983
MER101_3p12.3	94.7971	76.3394	120.448	100.114	-0.335507	0.0282821	0.130983
MER4_7q31.1a	27.0165	82.8475	19.8478	69.9378	0.457961	0.0282945	0.130983
ERVLB4_11q24.3a	20.3053	94.3535	6.45444	22.8704	0.386622	0.0283023	0.130983
PRIMA41_16p12.1a	11.017	13.3481	16.6941	16.2056	-0.303919	0.0283521	0.131071
HERVIP10F_13q34	73.3513	573.88	17.7366	103.907	0.439115	0.0285013	0.131537
ERVLB4_16p13.3a	1526.33	1438.11	1147.67	981.607	0.326878	0.0285147	0.131537
MER4_7q22.3	100.665	871.602	26.2688	125.388	0.469726	0.0285745	0.131557
ERVLB4_19q13.12	398.628	283.089	470.103	354.672	-0.270265	0.0285806	0.131557
HERVI_7q33b	21.1343	41.0393	16.6312	42.9219	0.443872	0.028685	0.131779
MER101_11q13.2	24.9036	35.9937	19.0923	30.747	0.409449	0.0287062	0.131779
HML2_3q21.2	158.812	139.372	197.263	144.805	-0.369193	0.0287215	0.131779
HERVH_18q21.32	6.88685	13.9912	6.31672	14.9168	0.320895	0.0289294	0.132591
ERVLB4_8q22.1	20.2666	21.8249	16.0903	18.9917	0.356687	0.0289883	0.132718
ERV316A3_6p25.3a	13.7578	18.5526	10.3346	10.895	0.317574	0.0291235	0.133194
MER4_2q36.3b	41.49	270.999	13.8915	36.1441	0.438463	0.0292913	0.133818
ERV316A3_2q21.2b	6.10454	27.5567	5.12403	24.3744	0.305498	0.0293546	0.133964
HERVH_5p15.31a	14.9855	46.3454	15.0249	54.1074	0.411572	0.0294561	0.13415
HML4_4q13.3	129.226	1169.24	11.3022	42.1641	0.420675	0.0294583	0.13415
HERVE_9q34.3	660.166	1202.06	971.274	1503.04	-0.58498	0.0295813	0.134567
HERVW_1p12b	2035.09	1418.45	1683.23	975.436	0.242392	0.0296137	0.13457
LTR19_10p15.1	4.93182	14.2157	16.2803	147.783	0.305898	0.0298726	0.135575
MER4_Xp22.2d	111.509	100.894	123.887	86.9392	-0.327891	0.0298983	0.135575
ERV316A3_11q13.3	157.513	335.347	85.4857	222.19	0.616994	0.0299467	0.13565
HUERSP2_Yq11.223	12.0312	21.6868	10.9174	21.6759	0.389375	0.0300168	0.135823
HERVH_6p22.3d	51.2477	121.016	85.7791	172.612	-0.564934	0.0302987	0.136954
ERVLE_1p34.3c	11.6526	15.4816	8.94072	9.9637	0.316207	0.0305248	0.137703
ERVLE_2q24.3b	5.99551	9.0298	5.45697	8.53077	0.272054	0.0305291	0.137703
MER41_1q21.3a	58.3325	49.8029	69.0787	50.9508	-0.319993	0.0306016	0.137885
HARLEQUIN_7q33b	13.9972	75.501	5.31983	19.208	0.324777	0.0306629	0.137932
ERV316A3_2q12.3b	6.72274	24.4387	6.63407	21.8277	0.333355	0.0306995	0.137932
HARLEQUIN_17q25.3b	32.1453	57.2201	47.8021	95.8141	-0.401987	0.0307089	0.137932
HERVL_3q21.3	165.498	97.0057	135.692	90.2501	0.252134	0.0307713	0.138066
HERVH_17q25.1b	223.144	213.84	239.473	159.846	-0.353953	0.0308356	0.138209
ERV316A3_6p25.1c	16.3499	21.105	13.5829	18.5115	0.343098	0.0309291	0.138483
HML5_12q15	82.3473	178.085	138.704	372.578	-0.509765	0.0309631	0.13849
HML6_3p21.31a	34.0687	259.146	6.99115	17.3935	0.365081	0.0310689	0.138818
MER4_Xp22.11a	11.0383	34.7156	8.44745	39.4112	0.345841	0.0313644	0.139991
ERV316A3_1q21.2	37.9741	36.8474	47.4284	42.5157	-0.325999	0.0316324	0.14104
MER4B_14q21.1c	5.31232	15.9339	5.67811	17.8664	0.315955	0.0317121	0.141248
HERVW_19p12b	5.46794	11.2449	6.33225	19.0422	0.297435	0.0318419	0.141678
HERVW_4p13	15.9969	122.269	3.60596	11.3158	0.311948	0.0321786	0.143027
ERVLE_6q14.1g	10.187	16.685	7.84005	12.3848	0.342004	0.0322939	0.14339
MER34B_11p15.5	167.883	467.736	87.644	258.085	0.693425	0.0324124	0.143694
HERVH_Xq23m	19.8347	194.492	12.6543	128.931	0.296553	0.0324296	0.143694
ERVLE_19p13.2a	154.807	95.7939	194.713	114.835	-0.303198	0.0325397	0.144032
PRIMA41_Yp11.2	11.2026	58.6013	7.19216	44.9357	0.309887	0.032629	0.144277
MER41_7q22.3a	129.828	1112.19	25.0286	106.339	0.469925	0.032737	0.144521
HERVH_9q22.2	10.8777	73.5499	3.31891	9.79548	0.294187	0.0327965	0.144521
HERVH_11q23.3a	112.592	406.988	95.0037	160.589	-0.541883	0.0328123	0.144521
ERVLE_20q13.32b	9.35965	18.5846	15.7801	20.1039	-0.34637	0.0328195	0.144521
ERVLE_7p22.1b	12.1786	17.6391	11.1207	21.2782	0.343361	0.0330142	0.145228
HERVL66_19p12a	51.7036	65.2452	41.4788	65.1203	0.435436	0.0332716	0.14621
HERVL_2p11.2b	33.165	30.1202	41.0121	35.1591	-0.318391	0.0334871	0.147006
HERVL_18p11.32a	45.8833	88.7921	40.2184	109.667	0.534218	0.0335743	0.147237
HML3_17p13.1	225.95	283.295	279.142	380.648	-0.350732	0.0336235	0.1473
ERVLB4_2p21	5.91846	9.29779	5.26729	7.90346	0.275234	0.0336626	0.1473
HUERSP3B_Xp21.3b	0	0	25.7041	298.379	0.236708	0.033741	0.1473
HERVH_8q21.2b	9.18198	35.9985	13.1358	68.0626	0.335178	0.0337874	0.1473
MER4_17p11.2b	129.016	88.3509	158.334	97.2984	-0.292984	0.0338023	0.1473
HERVEA_Yq11.221d	21.823	114.27	13.2607	50.7021	0.41253	0.0338258	0.1473
HERVL_18p11.32c	10.4182	46.0447	6.0254	23.7415	0.331833	0.0338634	0.1473
HERVL_1p22.3	5.16398	9.17135	5.41066	11.7329	0.275965	0.0338649	0.1473
HARLEQUIN_19p13.11	1108.99	473.39	1271.51	651.814	-0.187073	0.0339335	0.147448
PRIMA41_19p12b	4.46486	9.86493	5.82676	21.1592	0.277758	0.0341561	0.148
HERVH_6p21.2b	165.274	267.076	210.486	246.466	-0.533844	0.034167	0.148
HERVEA_5q14.3	9.16476	23.0653	9.17596	29.0141	0.361993	0.0342403	0.148
ERVLB4_10p11.21	6.23851	8.83295	6.22957	10.4706	0.279317	0.0342764	0.148
ERV316A3_12q14.1e	31.0607	29.1664	25.0979	22.4112	0.330109	0.0342875	0.148
HERVH_6q22.1b	31.5388	301.485	10.0558	84.1861	0.316032	0.0342881	0.148
HERVH_12q14.1b	45.1817	459.286	21.5501	233.569	0.309666	0.0343032	0.148
HARLEQUIN_1q32.1	5696.99	12064.8	5539.85	6108.65	-0.44976	0.0343905	0.148226
ERVLB4_4q27	0.236104	1.95792	40.7924	471.325	0.236333	0.0345644	0.148826
HERVE_12q24.32	27.4673	169.057	14.3286	70.0375	0.394321	0.0347264	0.149373
ERV316A3_15q21.1e	7.18249	18.0682	5.02665	9.85991	0.308199	0.0347727	0.149421
ERVLE_11p11.2d	12.4322	29.2683	8.0299	14.7669	0.355986	0.0348255	0.149497
ERVLB4_2q32.1f	13.5256	27.2844	11.9199	31.5707	0.389522	0.0348837	0.149597
PRIMA4_Xq21.1a	7.84884	73.7103	15.6671	156.626	0.282996	0.034995	0.149924
MER41_19q13.43a	215.838	117.35	244.434	104.016	-0.204535	0.0351035	0.150237
HML2_10q24.2	225.032	578.034	129.214	354.32	0.564178	0.0353254	0.151035
HERV4_5q33.1	37.4945	122.784	79.5512	216.008	-0.487443	0.0354253	0.151311
ERVLE_21q22.3b	15.8462	77.403	39.7629	280.427	0.392217	0.0354904	0.151421
HML3_8p12	9.18819	12.8753	7.72871	11.1871	0.309367	0.035522	0.151421
HERV9_10p13	49.1698	83.7281	50.0118	41.4164	-0.360912	0.0357369	0.152185
HERVL40_19q13.33	13.2034	32.107	21.0536	41.0738	-0.357315	0.0358868	0.152478
MER4_16q24.3	521.574	428.005	628.044	487.199	-0.229658	0.0359071	0.152478
MER41_4p15.31	12.4876	32.0744	12.0019	32.4712	0.370984	0.0359129	0.152478
ERV316A3_2q32.2c	43.493	118.285	23.9582	43.9175	0.416775	0.0359622	0.152535
HERVIP10FH_1p33a	18.3905	20.9799	24.6217	31.032	-0.327994	0.036009	0.152583
MER61_21q22.11	8.0249	15.4809	11.6922	12.2308	-0.286825	0.0361501	0.152966
HERVH_19q13.32e	83.601	319.027	36.4081	69.7635	0.47076	0.0361814	0.152966
MER61_10q21.3	260.286	251.47	187.677	179.854	0.40834	0.0362341	0.152966
LTR46_16q23.1	38.704	44.501	47.2222	38.8676	-0.337962	0.036243	0.152966
HERVL_13q31.1b	12.329	25.222	8.50055	15.5372	0.340731	0.0363005	0.153057
HERVK11_19p12a	44.9812	304.043	43.7589	108.105	-0.478472	0.0365652	0.154021
ERV316A3_9p13.3a	91.3635	135.955	58.3943	60.964	0.387708	0.0366566	0.154097
MER41_14q13.1	14.2029	38.1507	14.2914	48.8005	0.366192	0.0366709	0.154097
MER41_1p34.1b	5.82662	9.78657	5.06214	7.51891	0.262847	0.0366915	0.154097
HML2_8p23.1a	10.2512	34.4897	9.52435	29.6694	0.373941	0.0368467	0.154597
MER4_6q27b	5.60349	14.7008	5.84132	16.476	0.306864	0.0369677	0.154952
HERVK11_1q32.3	221.074	289.229	177.413	238.453	0.324111	0.0370941	0.155306
MER101_22q12.3	10.7129	17.5573	17.0882	20.9393	-0.325585	0.0371573	0.155306
MER61_1q21.3	9.59153	20.6483	7.17502	10.3339	0.27856	0.0371612	0.155306
HERVL_6p12.3a	12.3665	39.197	9.54263	34.0881	0.344281	0.037221	0.155403
HERVH_3q21.2b	102.652	90.8889	117.54	87.5661	-0.356315	0.0372598	0.155413
ERV316A3_4p16.1a	8.10938	18.7671	7.85888	25.5327	0.313413	0.0373694	0.15561
HERVH_10q24.33a	5.06891	15.9718	5.58568	28.2322	0.274763	0.0374078	0.15561
ERVLE_15q26.3d	19.9419	27.063	15.2596	16.4806	0.325712	0.0374362	0.15561
HML6_14q12a	10.7094	29.0423	10.228	33.2151	0.353496	0.0374568	0.15561
HERVH_6q11.1a	12.9951	27.3498	19.4198	28.2882	-0.362489	0.0374893	0.15561
MER4B_20q13.12	36.0764	52.6067	42.5841	33.715	-0.316491	0.037951	0.157093
MER101_Xq23b	28.3932	33.0931	39.1394	38.6234	-0.365826	0.0379561	0.157093
ERV316A3_6p25.3b	5.95583	12.9319	4.46062	8.07909	0.281055	0.037957	0.157093
MER4_6q14.3a	4.70331	8.52077	5.23966	11.5621	0.273727	0.0381105	0.157564
LTR25_11p14.1	33.7458	29.9382	27.2665	23.4026	0.314682	0.0381573	0.157564
MER41_12q12	24.5301	53.7231	14.4481	15.7823	0.342664	0.0382068	0.157564
HERVL74_19p13.2c	7.70878	9.32193	12.8172	12.5048	-0.268359	0.0382186	0.157564
ERV316A3_3q27.3c	9.35856	16.4452	8.9608	19.6707	0.326801	0.0383339	0.157741
HML3_19q13.2	1495.51	1771.95	1097.95	2257.64	0.351285	0.0383355	0.157741
HUERSP1_3p25.3c	5.52677	12.6588	5.00766	11.4582	0.276838	0.0384011	0.157859
ERVLE_2p11.2b	7.20257	11.0434	6.72356	9.14693	0.266155	0.0385871	0.158471
ERV316A3_4q22.1a	17.04	28.835	13.9891	27.5392	0.390213	0.0387578	0.158807
HERVH_8q22.1b	20.3155	40.7606	13.3353	24.9659	0.376629	0.0387914	0.158807
MER4_2p11.2a	257.831	129.744	298.902	133.282	-0.223246	0.0387979	0.158807
HERVH_Xq23j	7.70859	28.2228	4.93499	11.8934	0.296401	0.0388178	0.158807
HUERSP3B_3q13.11	20.953	62.2198	27.3154	76.6345	-0.396117	0.0388919	0.158957
HML2_12q24.33	247.481	149.442	280.515	148.368	-0.247147	0.0389592	0.15908
ERV316A3_5q22.1a	10.1998	96.7	1.81553	5.67393	0.244598	0.039183	0.159841
HERVH_2p16.2	5.60316	9.57284	5.20949	8.24166	0.261972	0.0393818	0.160315
HERVL40_6q22.32	33.6314	26.3066	43.8698	31.7428	-0.302199	0.0393821	0.160315
ERVLB4_11q23.3b	5.78571	17.9607	7.45286	29.9767	0.318532	0.0394118	0.160315
MER41_Xp11.23	5.48027	10.2051	5.1186	10.586	0.2799	0.0395964	0.160912
HERVH_5q31.1d	30797.8	291321	13190.9	151763	0.869433	0.0397586	0.161418
HERVL_12q21.2a	321.623	252.063	238.48	153.806	0.267285	0.0399321	0.161968
MER34B_19p13.11	47.8273	45.6868	58.5117	48.7126	-0.35063	0.0400693	0.162253
MER41_9q22.32	171.258	246.043	129.05	235.852	0.488966	0.0401025	0.162253
LTR23_7q11.23a	85.3772	77.3053	74.86	72.3107	0.335854	0.0401353	0.162253
HERVH_4q32.2c	93.7441	76.8756	105.562	66.7199	-0.278828	0.0401615	0.162253
HML3_4q34.1a	96.1023	343.455	135.785	785.287	-0.543644	0.0401925	0.162253
HUERSP1_15q22.31	19.2112	22.2093	27.0447	25.8328	-0.325232	0.0402563	0.16229
HERVH_6p21.1	148.792	162.574	199.735	268.653	-0.458197	0.0402776	0.16229
ERV316A3_11q12.1a	35.7545	58.9877	72.573	129.051	-0.507883	0.0405132	0.163077
ERVLB4_16q13a	18.7034	46.4091	11.4033	19.8034	0.363612	0.0405494	0.163077
HERVL66_19p13.11b	7.88833	11.5296	7.61455	12.3899	0.291737	0.0406359	0.163198
ERV316A3_7p13a	58.8448	47.3908	77.4976	63.2689	-0.330483	0.040656	0.163198
MER4_6q22.1b	100.475	88.4354	140.376	123.501	-0.359432	0.0407542	0.163373
HUERSP3B_3q26.1	10.1054	26.4984	10.2119	37.0475	0.360852	0.0407764	0.163373
PRIMA41_14q11.2	21.7688	52.9336	43.577	176.6	-0.434	0.0409136	0.163665
PABLB_14q11.2b	13.1167	36.2858	27.0815	123.906	-0.373566	0.0409497	0.163665
HERVL_5p15.2b	13.6466	44.9624	8.74738	23.0746	0.33758	0.0409643	0.163665
ERVLE_11p11.2c	43.703	42.4767	50.4479	38.8179	-0.323812	0.0410983	0.164047
HERVH_15q26.3a	43.1276	76.012	57.9476	76.6416	-0.48127	0.0412635	0.164387
HERVL_5q23.2a	7.40077	10.1351	6.61864	8.88703	0.265612	0.0412893	0.164387
HERVH48_5p12	1031.67	772.895	1253.24	1222.86	-0.265251	0.0413517	0.164387
ERV316A3_5p15.32d	1.2279	9.38881	23.3021	253.175	0.260608	0.041356	0.164387
HML6_19q13.43b	20132.7	10394.1	17618.8	8235.61	0.147159	0.0413761	0.164387
HERVK11_12q21.31	5.60797	24.1965	6.47831	27.2563	0.29953	0.0415661	0.164988
HERVS71_7q33	704.668	1366.29	454.872	1079.94	0.768793	0.041899	0.166155
HERVK11_19q11b	82.9898	138.405	46.2715	71.7766	0.443298	0.0420202	0.166481
HERVW_9p13.3	107.396	82.3372	123.475	92.9457	-0.280864	0.0420825	0.166573
HERVFRD_7p15.3	9.64626	13.647	15.9106	19.1949	-0.293589	0.0421861	0.166829
HERVH_22q13.1b	13.2364	18.6136	25.9123	41.9538	-0.370873	0.0422377	0.166878
HERVH_4q22.3a	174.236	186.72	235.861	266.025	-0.470654	0.0424113	0.16737
HERVL40_5p15.2	14.7884	54.4356	8.34928	26.96	0.35067	0.0424406	0.16737
HERVIP10F_9q13	367.571	1210.79	196.225	745.691	0.727292	0.0425203	0.167529
HERVE_12p13.31a	114.55	231.387	156.148	215.144	-0.467692	0.0425815	0.167562
ERVLB4_7p12.1b	8.20718	24.4629	5.9181	15.7027	0.311525	0.0426339	0.167562
ERV316A3_4q31.23b	11.9546	25.2193	19.7656	35.5491	-0.348417	0.0427531	0.167562
MER41_14q32.12	69.3671	68.0652	75.9155	55.6138	-0.330685	0.0427843	0.167562
ERVLE_3p24.3a	579.837	1893.96	750.334	1738.45	-0.835093	0.0428041	0.167562
ERV316A3_7q36.1a	33.2912	42.6843	43.6974	40.925	-0.382088	0.0428072	0.167562
HERVFH21_13q31.1	9.43835	14.5695	147.297	1051.98	-0.40848	0.0428094	0.167562
HML3_7q36.1c	11.7795	21.0653	17.8417	22.4743	-0.319893	0.0428429	0.167562
ERV316A3_1q43e	11.152	25.5067	11.0317	30.5865	0.350273	0.0429774	0.167935
ERVLE_13q12.13b	100.597	94.2389	132.194	122.513	-0.356188	0.0430525	0.168005
HML3_19p12c	24.7269	26.7873	34.1969	39.3654	-0.321317	0.0430939	0.168005
ERVLE_6p25.2b	5.69513	11.9073	5.30496	9.9868	0.269385	0.0431136	0.168005
ERVLE_1q21.2b	58.8639	105.266	89.3325	107.011	-0.504999	0.0434169	0.168654
MER4_10q11.22c	10.1273	28.9231	10.3217	37.9994	0.348143	0.043486	0.168654
ERV316A3_6p21.2b	39.5734	60.7755	65.4488	118.147	-0.422263	0.0434993	0.168654
HERVFH19_Xp11.3b	18.1759	55.0191	9.27355	22.0354	0.367257	0.0435118	0.168654
HERVH_11q21d	13.2651	32.3293	10.4047	27.4148	0.354129	0.0435255	0.168654
HARLEQUIN_6p12.3	10.1082	16.6436	10.8382	33.7706	0.308354	0.0435812	0.168654
MER41_3p22.1c	21.1935	45.57	31.4004	70.3231	-0.348957	0.0435988	0.168654
MER61_7p15.3	59.7764	252.787	26.5644	118.508	0.449131	0.0436284	0.168654
HUERSP3B_11q14.1	2.82535	8.55397	8.7141	65.2273	0.2703	0.0436358	0.168654
MER4_2q21.1a	33.3073	143.652	23.8069	82.7262	0.43135	0.0437129	0.168679
HERVE_8q24.3b	14.2557	53.5746	8.65223	31.1983	0.343056	0.0437511	0.168679
HML3_16p13.13	86.7842	85.0478	102.082	68.9192	-0.335191	0.0437706	0.168679
HERVL_1p22.2d	29.6755	32.1286	36.7836	29.2191	-0.335643	0.0438028	0.168679
PRIMA4_7q11.21b	98.9585	107.121	130.633	147.945	-0.394886	0.0438399	0.168679
HERVL_4q34.1c	223.822	815.833	245.725	1384.22	-0.577055	0.044105	0.169281
HERVH48_Xp11.21	1086.16	719.461	1235.74	682.707	-0.238179	0.0441338	0.169281
HERVH_16q24.1b	16.6007	115.958	7.73718	38.4395	0.332953	0.0441344	0.169281
HERVH_9q34.13	450.356	570.449	555.328	618.037	-0.428615	0.0441803	0.169281
HERVL_4q35.2	4.53389	9.19929	9.76363	13.1053	-0.270996	0.0441948	0.169281
HERVH_10p12.1c	34.3971	116.587	18.9683	62.0887	0.423977	0.0442665	0.169404
MER34B_4q27	5.70208	10.2315	5.3207	11.1496	0.262732	0.0443717	0.169628
HERVH_7p15.2	11.1072	38.4687	9.07185	38.0265	0.331924	0.0444047	0.169628
HERVH_13q22.3	56.9862	535.975	20.4981	154.178	0.333916	0.0445033	0.169853
ERVLE_11q24.3d	41.7822	82.9483	31.2275	76.8535	0.466404	0.0445495	0.169877
HERVIP10F_21q11.2a	3.72098	16.8001	6.22291	38.1549	0.278343	0.0447439	0.170466
HERVL_1q23.3a	980.679	663.502	1156.66	836.782	-0.245633	0.0448476	0.170709
HML3_5q22.2	15.9291	85.0288	12.1104	65.5228	0.332652	0.0449117	0.170744
HERVH_3q26.1c	33.9038	94.7693	17.3323	53.7666	0.418112	0.0449367	0.170744
HERVH_10q24.31a	4626.92	2974.79	4075.14	2814.94	0.218983	0.0451432	0.171368
HERVK11_8q11.1	35.5412	100.138	35.7521	121.571	0.486835	0.0451815	0.171368
HERVH_12q13.11c	7.08396	11.5642	6.21635	9.73213	0.263859	0.0452421	0.171446
ERVLB4_6q23.2a	6.32108	9.81963	5.62378	8.99141	0.271058	0.0455769	0.172153
HERVW_11q23.2	12.5573	20.1864	9.89872	16.6313	0.333618	0.0455887	0.172153
HERVFC1_11p15.4	27.1258	89.5342	27.1291	103.539	0.441065	0.0456205	0.172153
MER4_Xq21.31i	8.52668	27.1986	7.96261	25.0177	0.321332	0.0456452	0.172153
HARLEQUIN_Yq11.221c	85293.3	95836.4	73284.4	83176.3	0.278284	0.0456681	0.172153
HERVH_13q31.1d	8.72267	73.0118	2.3903	9.06498	0.254198	0.0456708	0.172153
ERV316A3_18q21.1a	22.7587	21.6214	32.212	30.5774	-0.323487	0.0457272	0.172214
HERVK11D_2q31.1	57.6512	142.96	72.0669	181.843	-0.461401	0.0458087	0.172368
MER4B_18q12.2	15.2394	16.8666	21.9405	24.3159	-0.295629	0.0458772	0.172474
HERVW_6q27b	33.3202	36.8357	47.8215	48.9554	-0.357936	0.0461116	0.173203
MER34B_3p14.1	29.0402	27.8426	36.1938	26.8096	-0.298817	0.0462153	0.173439
HERV3_19q13.33	76.6711	99.7163	92.2133	104.312	-0.40047	0.0462827	0.17354
HML2_11q23.3	352.032	598.444	567.458	2176.51	-0.621938	0.0465051	0.174221
HML2_1p31.1	70.0645	107.99	47.2328	104.61	0.555155	0.0466004	0.174425
HML5_5p13.2	80.4427	89.6614	87.4579	71.8964	-0.322424	0.0468443	0.175111
HERVW_14q32.11	72.8164	56.2038	89.4429	72.7639	-0.303128	0.0468896	0.175111
ERVLB4_8p12a	19.5686	57.3368	11.7731	39.9464	0.364919	0.046907	0.175111
LTR25_2q31.1	19.2328	98.3865	7.49515	22.3653	0.329676	0.0470465	0.175479
PABLA_19p13.2	14.6106	15.9832	21.5175	24.7004	-0.287037	0.0471909	0.175863
ERVLE_9q22.1	33.6294	25.088	42.7108	30.6789	-0.266241	0.0473606	0.176342
ERVLB4_Xp11.21c	71.2667	68.6377	86.3021	77.5952	-0.332813	0.047515	0.176762
HERVH_3q26.1b	28.0705	54.4095	27.0137	70.2415	0.457793	0.0477123	0.177342
MER101_Xp22.13	11.4774	36.5832	5.88491	9.84134	0.320107	0.0477992	0.17751
HERVIP10FH_8q24.3	219.538	152.025	254.029	156.917	-0.250295	0.0478696	0.177617
ERV316A3_5q35.3c	11.6601	48.3627	9.27004	32.1986	0.34032	0.047999	0.177744
HERVFH19_Xq13.1	78.6352	59.4164	98.3158	73.3131	-0.276366	0.0480113	0.177744
HERVW_2p24.2	8.1234	77.7146	20.4822	195.2	0.2739	0.0480287	0.177744
ERV316A3_11q23.3f	9.57177	12.3954	15.6225	16.5291	-0.28075	0.0481266	0.177823
ERV316A3_12q24.32d	8.41531	31.064	8.78542	41.1652	0.311251	0.0481335	0.177823
MER4_Yq11.221b	486.571	862.153	252.071	474.62	0.869828	0.048499	0.179018
MER41_4p16.1b	1621.02	994.484	1912.37	1090.49	-0.233243	0.0485989	0.179158
ERV316A3_2q32.2b	20.1777	45.9548	25.3905	89.4064	0.39988	0.048623	0.179158
HML3_10q26.3	35.1357	54.4814	73.8808	128.989	-0.455183	0.0486629	0.179158
HERVP71A_1q41	29.0563	42.3868	44.8926	59.4013	-0.389332	0.0488006	0.179375
HERVH_17p12	535.434	4224.6	249.337	744.711	-0.593123	0.0488058	0.179375
MER61_1q42.2b	10.0919	24.2701	6.73507	10.2097	0.29366	0.0489318	0.179553
HML2_6q11.1	9.86615	71.9917	5.82007	37.7193	0.283923	0.0489618	0.179553
HERVL18_4p15.2b	99.5227	71.6294	114.824	66.0997	-0.252443	0.0489805	0.179553
HERV9_Yq11.221d	324.318	579.316	241.643	584.818	0.818214	0.049115	0.179834
MER41_6q14.1e	116.412	142.662	145.682	177.827	-0.447483	0.0491535	0.179834
ERVLE_8q24.13e	7.34886	26.0369	6.00448	18.1448	0.283763	0.0491836	0.179834
HERVS71_11q13.2	72.5521	92.0895	87.4251	91.6745	-0.391955	0.0494014	0.180468
MER4_7q31.31a	7.58687	12.5142	7.07058	12.0148	0.297179	0.0494416	0.180468
ERV316A3_2q31.1b	55.8543	75	42.7326	68.4997	0.47811	0.04971	0.181293
HERVH_Xq22.1b	0.875883	4.18649	9.76122	103.896	0.226817	0.0498481	0.181641
PABLA_19q13.32	26.3307	101.031	26.3932	183.309	0.393511	0.0501581	0.182615
ERVLE_7p22.1a	33.1037	39.6953	24.1186	22.4957	0.308184	0.0502293	0.182718
HML6_3p21.31b	318.544	549.659	453.322	952.636	-0.499484	0.0502789	0.182743
HERVK11_19p12b	23.5533	29.2878	36.1126	46.1481	-0.357332	0.050685	0.184062
LTR19_1q24.3	30.7867	94.6251	13.9547	36.232	0.405961	0.0508251	0.184409
HML1_6q22.32	108.328	111.008	120.544	96.1133	-0.336369	0.0508729	0.184409
HERVS71_16p11.2	13.2993	75.2998	11.4895	56.3718	0.327128	0.0509189	0.184409
HERV9_11q22.1b	18.6502	39.0906	14.5725	33.8576	0.352291	0.0509533	0.184409
MER4_4p12c	18.1451	24.76	14.3716	20.1947	0.312886	0.0509969	0.18441
HML2_14q32.33	47.1212	122.342	58.7343	193.816	-0.454549	0.0511366	0.184759
MER4B_Yq11.221a	14.7577	26.8042	13.6218	27.0503	0.371981	0.0512077	0.184859
HARLEQUIN_7q32.1a	90.3472	515.714	141.678	1385.33	0.453727	0.0514032	0.185408
ERVLE_12p13.2a	35.9752	81.4958	48.3779	61.9652	-0.385373	0.051473	0.185503
MER4B_9q31.1a	6.83035	21.2846	14.0388	25.7971	-0.311886	0.0516228	0.185886
ERV316A3_2q37.3c	56.1691	50.1133	72.5596	57.3355	-0.319785	0.0516767	0.185923
HERVH_1p13.2b	70.358	137.787	39.6153	58.5008	0.434065	0.0519616	0.18679
HERVL40_7q31.1c	36.9637	49.3732	34.9551	68.7971	0.371189	0.0522908	0.187737
HML1_22q12.2	20.904	18.6527	31.5921	34.1787	-0.318092	0.052313	0.187737
HERVW_1q22	121.195	135.242	147.672	191.667	-0.311197	0.0526513	0.188793
HERVH_14q24.3a	386.31	411.376	309.998	208.275	0.22434	0.0529797	0.18981
ERVLB4_8p21.1c	22.1898	31.6488	22.1273	46.389	0.371753	0.0531997	0.190439
MER41_5q33.2	7.25301	22.7716	5.2547	11.191	0.284471	0.0534487	0.19117
HERVW_14q21.1	29.6962	52.3858	43.4037	70.8333	-0.402756	0.0536576	0.191615
HERVL40_6q14.1	37.8305	67.0425	30.0005	64.1016	0.440673	0.0536631	0.191615
MER4B_10q22.3	37.5165	41.8135	47.0043	46.5355	-0.33535	0.0538162	0.192001
ERVLE_3q13.13b	5.09154	10.1495	4.98315	8.46483	0.254613	0.0539209	0.192214
ERVLE_9p13.3b	7.71856	11.9696	6.59557	9.59714	0.26391	0.0539891	0.192297
ERV316A3_Xp22.11	235.874	299.757	172.184	249.664	0.393547	0.0541816	0.192821
HERVI_7q33c	515.073	1130.9	406.18	1444.14	0.744664	0.0543835	0.193259
HERVW_11p14.3a	9.14858	79.1561	7.68751	39.9619	0.28114	0.0543951	0.193259
ERV316A3_22q13.1	43.8853	39.4642	60.5595	56.9058	-0.341859	0.0545779	0.193747
MER41_8q22.3	10.0184	18.8223	15.1814	22.1318	-0.302729	0.0548982	0.194722
ERVLE_11q13.5c	10.5948	36.4927	8.4542	27.9129	0.308179	0.0550245	0.195008
PRIMA4_12p11.21a	427.213	377.741	353.031	378.234	0.308417	0.0554761	0.196445
MER61_1q43	1101.67	2255.44	668.034	1326.05	0.745536	0.055708	0.196977
ERVLE_4q32.2m	8.11032	30.8695	5.09895	9.1047	0.260977	0.0557185	0.196977
HML6_19q13.41c	1490.13	996.318	1666.52	1081.07	-0.256474	0.0557945	0.197082
HERVH_14q24.3b	30.1497	35.1571	38.9139	43.0751	-0.324685	0.055915	0.197344
HML6_19p13.2b	24.4109	28.8759	32.4724	30.9014	-0.316558	0.0560916	0.197749
HERVE_7p22.1b	10.2654	33.5069	7.30642	20.3257	0.305827	0.0561394	0.197749
HERV9_1p31.3	11.8373	18.052	10.6996	17.8415	0.337939	0.0561686	0.197749
HERVIP10F_10p12.31	31.0192	28.9431	40.5073	34.9945	-0.296112	0.0563438	0.198202
HERVW_3q25.1a	80.0012	232.686	166.819	444.012	-0.599132	0.0564469	0.198332
HERVIP10FH_15q25.1	753.758	387.901	857.249	443.038	-0.184051	0.0564737	0.198332
ERV316A3_8q11.23b	8.82816	26.8861	14.9213	22.7481	-0.297344	0.0566592	0.19867
HERVIP10F_11q13.2	11.3218	31.1421	10.6602	31.496	0.333234	0.0567177	0.19867
HUERSP3_2p13.3	77.0955	69.3659	99.5603	94.2863	-0.317948	0.0567332	0.19867
HERVL32_2q31.3	41.2766	72.1211	79.077	150.063	-0.45545	0.0567561	0.19867
ERV316A3_10q26.12	62.8262	138.788	88.8771	150.512	-0.502764	0.0569057	0.19903
HML5_19p12d	93.6949	445.25	104.309	710.622	0.492951	0.0571284	0.199645
ERVLE_22q13.2f	149.807	262.541	96.511	149.368	0.419617	0.0571805	0.199664
HERVH_5q35.3	93.6535	899.008	114.443	1270.65	0.359814	0.0572369	0.199697
HERVE_10p13c	27.8874	114.453	25.5548	30.2259	-0.350518	0.057548	0.200619
MER61_13q21.33	58.5009	193.828	25.6919	92.9461	0.469163	0.0576814	0.20092
ERVLE_11p15.5a	33.3069	47.0458	34.4583	77.6784	0.376604	0.0577459	0.20098
ERVLE_15q26.3c	49.5475	38.4358	58.6548	36.6953	-0.276229	0.0580478	0.201646
HERVH_4p16.3c	17.2642	33.2805	16.266	45.6483	0.361027	0.0580512	0.201646
HERVH_12q24.33b	26.9563	27.1959	38.566	65.7632	-0.321908	0.0580788	0.201646
ERVLB4_12p13.31e	33.5172	43.8558	51.3657	70.4999	-0.41249	0.0581828	0.201684
MER41_8q24.3	119.564	809.135	395.78	4360.02	0.459333	0.0582092	0.201684
MER101_16p11.2c	16.2832	84.485	11.7926	58.3061	0.322583	0.0582316	0.201684
HERVL_2p24.2d	77.7844	103.078	90.1383	84.9725	-0.377736	0.0583416	0.201901
HERVH_7p15.3a	5.91106	14.1403	5.21774	10.3584	0.260998	0.0584201	0.201997
MER4B_14q11.2b	6.64667	14.0923	5.85717	9.44294	0.260172	0.0584743	0.201997
HERVH_11q11	0.490454	2.32705	114.733	1329.24	0.23811	0.0585115	0.201997
HERV3_1q32.2	23.3179	76.9043	18.2464	61.4244	0.393828	0.0586308	0.202012
MER4_6q14.3b	20.8513	195.88	2.42238	5.57456	0.241768	0.0586474	0.202012
HERVH_7q34c	30.4053	31.63	41.84	66.1118	-0.308342	0.0586995	0.202012
ERVLE_9q33.2c	8.36326	17.359	6.75423	12.8359	0.278248	0.058705	0.202012
MER61_6q24.1a	53.4805	165.358	36.5967	142.304	0.42769	0.0587553	0.202022
ERVLB4_3p11.1c	46.7163	32.1781	53.9559	31.9893	-0.251963	0.0589338	0.202472
HERV3_2q14.3	23.5989	24.1345	31.3188	27.5607	-0.303679	0.0592103	0.203258
PRIMA4_18q23b	62.0817	67.5203	74.9266	67.0306	-0.305153	0.0594232	0.203825
HUERSP2_1p21.3	5.2784	8.9752	5.4193	10.1186	0.25052	0.0595498	0.204096
MER41_15q22.31b	61.5214	43.2124	75.5429	50.6387	-0.257427	0.0596159	0.204158
ERVLE_4q31.21a	13.3399	25.111	8.43187	12.6764	0.314128	0.0598578	0.20469
HERVIP10FH_8q24.13a	11.0196	24.7929	8.50583	16.2961	0.307268	0.0598672	0.20469
HML3_19p13.2b	15.079	23.8021	38.2462	137.334	-0.352543	0.0600596	0.204952
ERV316A3_6q16.1c	5.59139	10.5126	5.4568	9.25355	0.249872	0.0601044	0.204952
HERVH_6q14.1f	2.53715	8.45609	21.1339	211.68	0.249942	0.0601157	0.204952
MER4_9p13.3a	512.41	419.069	600.637	583.929	-0.268832	0.0601712	0.204952
HUERSP1_12q24.31b	16.4714	29.2971	12.2465	22.6961	0.33865	0.0601839	0.204952
HERVL66_19p12g	83.4114	238.712	112.945	248.877	-0.540448	0.0602382	0.204973
HERVH_19p13.12	1796.61	6012.46	902.285	4131.76	0.649514	0.0605302	0.205713
HERVH_1q41d	90.3808	801.759	114.909	1252.19	0.373991	0.0605521	0.205713
HERV9_6p21.2	647.314	3886.78	623.39	2481.39	-0.601147	0.0607469	0.206076
PRIMA4_1q21.1d	15.2215	37.2641	12.3069	32.6162	0.353095	0.0607555	0.206076
ERVLE_11q13.4g	152.449	125.823	175.48	116.672	-0.274843	0.0609488	0.206567
HERVL_7p21.3a	1705.49	1106.47	1472.15	996.055	0.278761	0.06105	0.206746
ERVLE_1q23.2b	487.452	260.814	552.365	322.797	-0.181006	0.0611624	0.206963
MER4_1q31.1	6.8966	23.0969	9.47665	37.3495	0.285904	0.0613637	0.207479
HERVL18_7p21.3	68.2547	526.045	19.2027	109.026	0.379494	0.0615931	0.207934
HERVE_2p13.3b	5.97473	14.6937	5.06801	15.0555	0.270246	0.0616272	0.207934
HERVL18_4q21.23	86.3114	193.99	74.2922	227.203	0.548741	0.0616445	0.207934
PRIMA4_18q23a	135.655	111.816	154.528	109.404	-0.260609	0.0620399	0.208916
HUERSP1_15q23b	148.068	281.951	76.5107	103.534	0.467604	0.062065	0.208916
HERVL_6q13b	8.92972	25.4353	6.40201	13.7599	0.287914	0.0620943	0.208916
MER34B_7q11.23b	6.30031	15.5825	5.11636	12.6066	0.266883	0.0621744	0.208916
HERVP71A_6q14.1	18.7904	21.1203	27.6226	31.456	-0.316856	0.0622174	0.208916
HERVK11D_15q24.3	7.72469	11.662	6.50381	9.06549	0.256675	0.0622291	0.208916
HERVL74_7p21.3	5.75399	14.8407	6.40144	17.0524	0.26871	0.0623926	0.209258
HUERSP3B_1p34.2b	12.3137	15.0739	18.5757	19.2829	-0.286565	0.0624434	0.209258
ERVLB4_5q11.2a	18.1343	29.3726	12.9641	18.3498	0.332719	0.0625332	0.209258
ERVLB4_2q13b	237.369	1298.23	62.1043	381.16	0.468859	0.0625737	0.209258
ERVLE_3q26.32a	8.11224	54.9149	8.44513	63.98	0.25868	0.0625971	0.209258
HERVIP10FH_3q13.33	42.3751	111.979	38.6987	123.678	0.443059	0.0626252	0.209258
HERVK14C_2p12	8.95741	23.2434	6.37796	13.3394	0.279137	0.0627569	0.209387
ERVLE_13q31.2e	12.4514	48.5868	13.9528	65.7219	0.337079	0.0627621	0.209387
MER101_2p25.2	283.426	284.188	320.291	227.197	-0.290365	0.06291	0.209619
PRIMA41_12p11.21	43.0724	100.809	37.9348	157.751	0.426337	0.06293	0.209619
HERVL_Xq25o	6.73201	13.0008	6.72694	13.3952	0.269963	0.0632424	0.210408
HERVL74_19q13.41b	9.0741	13.9292	15.7986	20.1386	-0.288938	0.0632655	0.210408
HERVH_14q32.12b	5.52089	13.074	5.27349	13.2459	0.253962	0.0633833	0.210636
HERVFRD_16q12.2	4.36448	24.33	5.75285	36.5475	0.239182	0.063465	0.210743
MER34B_14q24.1	7.54225	12.0928	7.60896	13.0137	0.262929	0.0637608	0.211561
HML3_4q31.3	373.085	495.753	479.831	595.772	-0.415517	0.0638991	0.211788
HML2_Xq28b	6.79212	14.4522	5.83853	11.7014	0.259449	0.063932	0.211788
ERV316A3_19q13.2	118.329	137.465	172.298	342.937	-0.358537	0.0639783	0.211788
HERVL66_19p12b	23.4113	34.9934	37.1943	52.7436	-0.375256	0.064061	0.211898
HERVH_3p12.3a	16.4511	28.617	23.6955	36.0664	-0.323968	0.0642949	0.212507
ERV316A3_4q13.1k	4.03107	17.0225	6.17019	23.596	0.257837	0.0644012	0.212694
MER4_5p12c	233.102	171.923	274.015	229.222	-0.25352	0.0645081	0.212882
HERVH_5q23.2b	21.3676	36.2814	14.5067	19.8944	0.335799	0.0646466	0.213174
HERVL40_2p23.3a	234.548	139.143	209.655	143.36	0.202985	0.064867	0.213641
HERVFH21_3q23	6.9367	10.0099	7.83543	15.0972	0.264462	0.0648884	0.213641
HERVH_2q24.1d	14.653	32.667	19.1114	25.1526	-0.296112	0.0650024	0.213851
ERVLE_12p13.31a	18.1639	24.1723	14.727	18.1579	0.292611	0.0651348	0.214122
LTR25_2q32.3a	9.27173	12.9632	7.97629	12.3573	0.276463	0.0652642	0.214331
ERVL_8p23.1	5.09002	7.70105	5.18181	7.74018	0.230576	0.0653786	0.214331
ERVLE_3q26.33	7.34924	28.0143	6.01675	27.4705	0.268102	0.0653983	0.214331
MER61_7p14.3a	9.96796	26.0666	17.2172	27.1211	-0.299851	0.0654663	0.214331
HERVH_9p13.3d	33.9946	29.9225	40.2206	27.8477	-0.265858	0.065475	0.214331
MER4B_4q13.3e	64.0056	54.1568	72.1948	48.2791	-0.281587	0.0655119	0.214331
HML6_19q13.41a	884.084	4161.06	664.7	1998.57	-0.386304	0.0655499	0.214331
HERVL_12p13.1a	7.58284	21.6869	7.09589	19.2531	0.264084	0.0657576	0.214845
MER4_9q34.3	4.22873	35.5523	6.41081	40.9002	0.23666	0.0658723	0.215055
HERVL_12q12b	61.9935	126.34	43.919	50.1892	0.335962	0.0660035	0.215319
HUERSP3_2q24.2	108.746	197.605	126.544	145.178	-0.44776	0.0660547	0.215321
HERVEA_19p13.11	1690.04	1117.58	1856.22	1044.93	-0.200849	0.0661539	0.21548
HERVH_13q31.3a	8.4208	22.0965	37.6988	266.313	0.324189	0.0666109	0.216694
ERV316A3_12q23.3a	6.9635	19.3191	5.56433	12.4661	0.272515	0.0666282	0.216694
HERVH_14q22.1b	86.6074	358.728	89.5137	223.291	-0.370312	0.0666792	0.216695
ERV316A3_21q21.1f	54.1987	134.332	47.114	167.633	0.471221	0.0668087	0.21695
HERVL66_19p12e	84.6995	245.596	526.698	3547.24	-0.539883	0.0670905	0.2177
ERV316A3_8q23.1c	135.203	1238.3	22.4182	41.3912	-0.353543	0.0671745	0.217706
HERVFRD_Xq22.1	62.3056	53.9023	71.1269	50.157	-0.262515	0.0671944	0.217706
MER61_17q11.2	11.6681	13.9988	18.5514	20.1183	-0.268076	0.0676455	0.218966
HERVL_4q34.1d	5.81404	21.9321	5.93779	21.3092	0.250239	0.0677088	0.218966
ERVLB4_19q13.32	42.9871	35.4645	50.4763	38.3072	-0.268874	0.0677516	0.218966
ERVLE_2p11.2f	4.92559	11.4682	5.13211	10.5955	0.24243	0.0677885	0.218966
MER41_5q23.1b	6.11098	10.8272	11.7287	15.7952	-0.258978	0.0678439	0.218979
HERVL74_19p13.2b	38.4659	58.1428	54.5611	78.2421	-0.345742	0.0679111	0.21901
ERVLE_14q22.1	45.9965	46.3717	51.6121	37.4342	-0.294963	0.0679761	0.21901
HERVL_1q21.1a	12.3461	33.2389	9.50504	23.316	0.3145	0.0680076	0.21901
ERV316A3_12q24.33	7.61626	10.0575	7.99502	14.2158	0.257562	0.0681809	0.219402
HERVH_19p13.2b	231.261	230.359	257.218	219.701	-0.269587	0.0682491	0.219457
HERVH_13q14.2a	281.068	188.744	322.65	180.458	-0.252876	0.068524	0.220175
ERV316A3_21q21.2g	20.5566	23.9302	29.9638	32.2389	-0.32247	0.0694695	0.223002
ERVLE_Xq26.2a	21.439	109.253	24.9804	161.762	0.344026	0.0695085	0.223002
LTR19_12q23.3	7.8231	18.7722	6.21436	9.82755	0.263959	0.0698362	0.22373
HERVH_6q13	6.94352	25.5291	7.33941	38.3683	0.265184	0.0698401	0.22373
HERVIP10FH_14q11.2	29.0201	140.8	58.5331	452.57	0.376567	0.0701013	0.224398
HERVW_4q21.22	108.089	180.733	198.006	546.917	-0.375293	0.0703755	0.224876
LTR25_17p11.2	33.6136	130.03	27.5257	127.093	0.357551	0.0703864	0.224876
MER4_7p14.3a	2069.56	1242.16	2446.92	1489.19	-0.211379	0.0704264	0.224876
ERVLE_2q11.1a	8.25386	66.3468	6.85517	51.7434	0.244545	0.07048	0.224876
HERVS71_19p12a	564.607	2183.6	1873.68	12574.4	-0.693686	0.0705142	0.224876
ERV316A3_6p21.33b	54.0542	52.8243	66.3423	59.2413	-0.323306	0.0706157	0.225031
ERV316A3_21q22.11b	873.998	514.633	985.765	515.252	-0.204834	0.0707687	0.225343
HERVL40_11q13.4b	59.5202	42.0088	71.911	48.4083	-0.268316	0.0708704	0.225343
MER41_2q33.1	7.22225	15.9429	5.44341	8.91067	0.25301	0.070872	0.225343
HERVH_9q33.2a	4.26579	11.1929	8.99515	15.6961	-0.24783	0.0711009	0.225903
HERVL_11q14.1f	9.27815	18.6468	7.63782	13.4579	0.276861	0.0712523	0.225957
HERVI_7p15.3	17.7952	18.3343	14.5998	14.0758	0.268587	0.0712832	0.225957
ERVLB4_Xq11.1b	6.43081	11.2694	10.0109	11.0376	-0.244475	0.071285	0.225957
HML1_12q15a	11.0653	108.794	3.37146	22.0279	0.222636	0.0713297	0.225957
ERVL_11p14.3	66.8744	78.738	88.7249	105.207	-0.338106	0.0713992	0.226009
ERVLB4_19q13.42b	5.81302	11.9417	8.21877	46.0506	0.248078	0.0714612	0.226038
ERVLB4_13q14.11a	6.43046	10.9585	10.9465	14.7806	-0.242278	0.0715352	0.226104
HML3_1q21.3a	229.015	190.257	258.062	187.751	-0.259265	0.0717307	0.226554
HERVL_3p24.3a	14.0222	18.1887	16.7117	14.2955	-0.255382	0.0719726	0.227022
ERVL_16p12.3	47.521	89.0383	58.428	83.861	-0.401964	0.0720393	0.227022
HML5_19p12e	27.3095	51.3212	34.828	45.4956	-0.349163	0.0720891	0.227022
HERVH_3p21.31a	169.993	280.498	177.518	107.488	-0.26091	0.0720916	0.227022
HERVH_19p13.2e	35.3825	222.428	60.4798	508.506	0.345344	0.0724025	0.227745
MER101_13q21.31	19.5194	62.6758	13.6197	31.7987	0.352307	0.072524	0.227745
HERVH_12q24.33a	22.7701	25.7079	48.7642	197.879	-0.323421	0.0726386	0.227745
ERV316A3_1q24.2a	29.9611	56.8223	34.949	43.3029	-0.36354	0.0726423	0.227745
MER41_Xq11.1c	162.847	153.508	216.003	194.584	-0.534264	0.0727988	0.227745
HERVL_4q13.2b	15.0941	32.7363	13.7151	35.4221	0.333075	0.0728056	0.227745
ERV316A3_2p23.3a	20.4708	37.7302	14.6229	17.7933	0.312358	0.0728809	0.227745
PRIMA41_22p11.2a	34.0036	235	11.7869	58.9741	0.312577	0.0729035	0.227745
HERVFH21_19q11	6.11667	12.5851	5.62289	10.5374	0.242645	0.0729275	0.227745
HERVL_21q22.2	30.0071	35.9511	25.999	35.7696	0.329698	0.0729522	0.227745
ERVLE_4q25h	8.49129	12.3291	7.8919	10.6066	0.250327	0.0729524	0.227745
LTR46_11q21	90.8885	190.253	69.0574	144.486	0.438751	0.0729652	0.227745
ERVLE_1p22.3c	7.89587	10.9319	7.66461	11.2826	0.247217	0.0730268	0.227745
HERVH_20p11.23a	56.9388	47.6979	96.3868	240.233	-0.312414	0.0730685	0.227745
ERVLE_5q21.1a	18.2518	23.0451	15.4474	24.0039	0.301202	0.0733649	0.228446
HML1_7p14.3a	116.693	101.233	128.752	81.0242	-0.272781	0.0734003	0.228446
HERVH_15q15.2	14.1748	16.6893	19.1303	18.3065	-0.26727	0.07347	0.228496
HERVW_1p32.3b	8.30906	13.1325	14.2107	19.3536	-0.267461	0.0736335	0.228838
ERVLB4_21q21.3e	3103.79	1469.74	2798.46	1404.27	0.160176	0.0738292	0.229279
HML6_11p15.4	112.581	274.213	118.487	190.047	-0.48608	0.0740314	0.229739
PABLA_7q11.21a	4.53741	9.2283	5.58698	16.9906	0.238933	0.0741328	0.229887
PABLA_6q26a	12.0779	45.706	11.6913	70.683	0.302513	0.0742795	0.230082
HERVH_3q21.2a	18.02	41.1418	13.6735	34.6933	0.329024	0.0743111	0.230082
HML2_7q34	27.8137	26.3686	35.519	34.8939	-0.279804	0.0743575	0.230082
HML6_5q13.2e	836.762	496.535	993.903	636.261	-0.202129	0.0745624	0.230549
HERVH_8q21.13a	39.1727	277.363	16.6523	123.82	0.315027	0.0747332	0.23088
MER4_19q13.41b	120.286	109.679	136.672	87.961	-0.243405	0.0747778	0.23088
HERVH_Xq21.33a	68.0546	204.025	89.0518	198.185	-0.473583	0.075151	0.231865
ERVLE_20q13.33b	88.8088	128.509	74.9262	169.988	0.392831	0.0752188	0.231906
ERV316A3_10p11.22b	6.17798	10.1981	11.3087	13.4423	-0.251659	0.0755313	0.232702
HERVL74_7p21.2a	17.8573	20.1473	16.59	26.046	0.319001	0.0756885	0.233018
ERV316A3_12p11.23b	27.2189	30.1923	33.6424	33.9478	-0.29461	0.0758206	0.233124
ERVLE_2q34e	8.6666	13.7067	7.54093	11.3284	0.248783	0.0758452	0.233124
HERVL18_15q21.3	115.078	547.477	130.053	403.491	-0.487447	0.0758898	0.233124
PABLA_9q33.3	17.5891	57.1847	14.7036	33.2586	0.306284	0.075946	0.233124
MER41_15q21.2a	8.55893	11.5554	8.44149	11.842	0.240186	0.0760032	0.233124
HERVFH19_9q34.11	100.609	181.357	69.695	104.974	0.400872	0.0761086	0.233124
HERVH_2p16.1c	194.833	487.283	151.043	771.754	0.347939	0.0761321	0.233124
HERVK11_Xp11.3	43.4794	32.286	52.8339	48.7538	-0.248557	0.0761599	0.233124
ERVLB4_22q11.22b	6.40801	15.2443	6.01792	12.4029	0.26322	0.0762414	0.233134
HERVW_6q22.1	177.546	509.296	165.037	399.547	-0.479588	0.0764233	0.233134
HML2_8p23.1f	3.34946	10.9117	6.38137	32.6927	0.247475	0.0764281	0.233134
ERVLB4_2q24.3c	7.49362	24.3616	6.14003	14.9343	0.251649	0.0764354	0.233134
MER4_Yq11.221e	22.728	36.9084	21.6262	40.5781	0.392524	0.0764876	0.233134
ERVLE_2q36.3c	10.8327	23.5009	8.6596	21.6581	0.28974	0.0764913	0.233134
ERVLB4_2p16.3	5.44945	9.52889	9.99552	11.5803	-0.235727	0.0766489	0.233448
HERVH_10q25.1c	5.17219	9.34914	5.16531	9.66601	0.238593	0.0767655	0.233637
HERVL32_2p15a	15.462	23.812	11.696	17.4183	0.310928	0.0769135	0.23392
HERVH48_1q44c	84.2341	86.5623	97.7619	82.3043	-0.307817	0.0769869	0.233976
HML6_4q13.2	4.41829	17.8705	9.74819	61.8769	0.260356	0.077242	0.234585
PABLB_Xp21.1c	10.843	16.4281	8.9091	12.0938	0.266862	0.077576	0.235432
ERVLE_17p11.2c	849.952	484.51	1008.81	640.273	-0.198138	0.0777247	0.235715
HML3_12q23.3	30.4581	124.961	16.8279	50.0016	0.344797	0.0778799	0.236018
HARLEQUIN_4p14b	12.1821	19.7334	19.3606	24.7271	-0.285837	0.0779971	0.236205
HERVW_14q21.2	83.1136	181.774	89.5321	174.744	-0.281224	0.0781266	0.23643
ERV316A3_1p13.3a	5.44358	8.86422	11.0158	15.2197	-0.23636	0.078358	0.236837
HERVH_8q24.22d	0.977226	3.20656	11.3173	114.045	0.206425	0.078372	0.236837
HERVIP10FH_11q22.1a	61.7344	308.394	7.77854	18.4931	0.330858	0.0785891	0.237325
HERVFRD_6p24.2	88.7856	92.4138	123.609	136.527	-0.313077	0.0787301	0.237582
HERV3_Yp11.2a	120.042	272.963	84.3925	155.659	0.596188	0.0791474	0.238493
HERVE_11q13.2c	12.6818	17.5197	12.0354	19.3792	0.302639	0.0791539	0.238493
MER41_3q27.1	15.1338	19.2825	24.9294	40.4081	-0.294281	0.0791997	0.238493
HUERSP3B_15q14	5.79707	8.55316	5.73159	8.44398	0.220875	0.0793343	0.23873
HERVW_7q21.2	95.5334	87.8555	118.437	92.2189	-0.331204	0.0796907	0.239634
ERV316A3_6q22.1c	7.77932	24.6058	7.49345	23.1271	0.277847	0.0798551	0.239796
HERVL_6q11.1b	12.4043	37.7653	20.3044	46.2997	-0.322377	0.0798572	0.239796
HERV9_1q25.1	50.3171	105.7	53.3781	55.5744	-0.326552	0.079976	0.239984
MER61_2q32.3a	38.4415	96.3088	28.7916	90.0243	0.42413	0.0803159	0.240835
HERVL18_6q23.3	20.7167	129.665	25.5322	203.168	0.300211	0.0804771	0.240941
HERVH_5q21.1c	17.3288	49.7548	26.9557	45.5392	-0.349803	0.0805598	0.240941
HARLEQUIN_Xq13.3	5.91531	11.2534	6.00126	11.0489	0.23841	0.0806526	0.240941
HUERSP3_10q23.33a	13.7705	20.3287	12.1097	19.5213	0.269391	0.0806573	0.240941
HERVEA_8q11.23b	35.0337	28.5154	31.3023	27.3965	0.280059	0.080674	0.240941
HERVH_12q21.32c	60.2323	149.464	34.4526	82.6289	0.428227	0.0806901	0.240941
ERVLE_19q13.12d	6.90862	11.1012	5.94681	7.95278	0.227762	0.080777	0.241032
HML3_13q12.11b	156.426	154.553	171.485	118.752	-0.289067	0.0810834	0.241777
HML2_19p12a	371.019	1934.85	1587.04	16733	-0.565685	0.081409	0.242578
ERVLE_11p11.2a	19.8715	25.2422	17.2842	26.2464	0.28242	0.0814975	0.242672
ERV316A3_5q35.2b	180.262	474.782	108.956	252.851	0.501026	0.0816434	0.242896
ERVLB4_Xp11.23b	18.4409	65.685	10.8967	18.0988	0.302002	0.0816863	0.242896
ERV316A3_6p25.1e	37.2352	78.1983	69.2428	176.349	-0.410522	0.0818038	0.243076
ERVLE_15q23e	5.12189	12.1765	8.74475	48.5628	0.25141	0.0820226	0.243418
HERVS71_6p22.1	86.6754	533.193	18.4687	64.5787	0.399162	0.0820529	0.243418
ERV316A3_3q13.13b	9.26944	18.1466	19.0759	32.7817	-0.304543	0.0820902	0.243418
HERVE_Xp11.23	1682.38	2669.39	2788.27	11457.8	-0.290075	0.0823439	0.244001
ERVLE_12q13.12	25.866	22.0133	31.977	22.4879	-0.237538	0.0825776	0.244438
HERVH_12p13.2b	26.3877	46.9971	36.6257	43.6431	-0.354324	0.082784	0.244438
HERVL66_4p16.3	163.939	102.199	186.641	100.057	-0.225909	0.0828065	0.244438
ERV316A3_3q13.12e	11.1567	15.6347	10.2216	14.504	0.26217	0.0828607	0.244438
ERV316A3_5q31.3c	7.60552	13.5019	8.31731	16.8281	0.273078	0.0829523	0.244438
ERVLE_Xq22.1a	207.96	152.219	246.624	181.132	-0.245657	0.0829595	0.244438
ERV316A3_11q12.3	16.7332	19.3756	15.2779	18.3925	0.273623	0.0830064	0.244438
MER4_9q21.12	6.53306	10.7724	6.53349	10.6348	0.229532	0.083022	0.244438
HERVK11_11p15.2	13.1719	57.6263	14.0046	83.6269	0.291558	0.0830264	0.244438
ERV316A3_13q13.3c	226.074	577.401	131.553	282.933	0.587637	0.0830644	0.244438
HERVEA_19q13.33	271.493	319.612	333.542	388.696	-0.309329	0.0831234	0.244444
MER41_1q42.3	6.60386	9.68586	6.59675	9.71464	0.218786	0.0832455	0.244634
ERVLE_8q22.3b	66.4176	56.3465	80.1417	57.3326	-0.277957	0.0838633	0.245975
ERV316A3_1q24.2b	14.9806	32.3365	14.2294	32.6657	0.311216	0.0838644	0.245975
HERVL_12q21.1f	9.11461	20.5552	7.71618	13.896	0.264857	0.0838746	0.245975
ERVLB4_Xq21.1j	4.38159	10.6445	6.3244	21.0504	0.246105	0.0841457	0.2466
ERV316A3_5p15.2e	88.4629	482.658	41.3548	148.976	0.428177	0.08421	0.246619
HERVH_1p31.1e	22.3597	33.788	32.8447	46.2553	-0.329424	0.0842962	0.246702
HARLEQUIN_11q22.1b	6.58552	13.2589	6.84849	18.7304	0.235825	0.0844279	0.24691
HERVH_12p13.31e	7.91323	30.0016	11.3239	83.7906	0.2631	0.0844828	0.24691
HERVS71_Yq11.21	124.759	270.473	105.179	264.659	0.589718	0.0846208	0.247144
HERVH_4q34.3c	5.3634	32.7621	7.72798	37.445	0.247379	0.0848348	0.247599
ERVLE_2p22.1b	32.2499	32.1611	39.3881	27.9704	-0.253502	0.0849544	0.247779
ERVLE_14q12m	67.3847	192.247	38.6321	65.9515	0.373495	0.0851113	0.248008
HERVH_2p13.3d	19.6202	64.8554	14.5463	48.9261	0.330801	0.08516	0.248008
HERVK11_1q23.3a	19.3275	24.2941	29.8067	42.3974	-0.301599	0.0852075	0.248008
ERV316A3_13q13.3e	9.07482	10.8794	8.7713	11.3686	0.22952	0.0852822	0.248057
PABLA_13q34	10.1547	26.8832	7.3643	10.7577	0.235912	0.0855546	0.248679
HERVL_3p24.3b	25.1102	65.0532	23.9323	82.1707	0.373346	0.08579	0.249194
HML5_Xq11.1	27.1139	29.7064	32.3947	26.9689	-0.274356	0.0862834	0.250457
ERVLE_3p14.2a	7.1796	10.3971	7.2395	10.3023	0.227452	0.0864392	0.250738
MER101_5q35.3	73.6586	168.967	75.1769	105.01	-0.37228	0.0868188	0.251668
HARLEQUIN_1q44	4.78225	21.3168	5.92929	39.127	0.229666	0.0869674	0.251928
HUERSP2_21q22.3	653.003	1390.58	931.524	2362.07	-0.512844	0.0873513	0.252627
ERVLE_9q33.2b	22.6311	36.1278	18.0814	28.1313	0.326401	0.0873582	0.252627
HERVL40_6q15	7.27754	19.3922	14.1392	33.1869	-0.282284	0.0873862	0.252627
HERVE_2q24.1b	12.9607	113.474	5.26588	25.4554	0.243899	0.0880013	0.254233
HERVK11_22q11.21	186.56	991.422	244.339	1352.78	-0.367544	0.0880786	0.254284
ERVLB4_2p25.3	27.0247	29.4298	20.235	23.4623	0.286458	0.0882979	0.254682
LTR57_5p12b	93.4474	141.053	124.046	166.503	-0.322626	0.088336	0.254682
HERVW_1p33d	3.05096	10.9873	7.38717	14.1016	-0.220537	0.0884426	0.254817
HERVW_Xq21.1b	11.8692	69.7792	11.4275	65.7197	0.272587	0.0887618	0.255564
LTR46_Xq27.3b	2.21717	17.3297	21.3427	186.577	0.222332	0.0888661	0.255692
HERVL_3q26.33	2.28847	9.48235	10.0824	96.3443	0.223247	0.0891213	0.256254
HUERSP3_2q32.1	22.7221	21.7065	29.2245	32.3224	-0.259808	0.0894097	0.25691
ERVLE_5p13.2c	4.69697	8.8491	9.32916	12.9168	-0.232514	0.0895064	0.257015
MER61_Xq11.1	8.45866	12.8596	7.13717	9.56858	0.247945	0.0896025	0.257118
HERVIP10F_3p26.1	2172.39	7723.22	834.264	3525.17	0.764994	0.0897659	0.257339
HERVH_1p34.2a	173.997	123.726	199.042	130.064	-0.226875	0.0898267	0.257339
HUERSP3B_17p11.2	89.8321	57.1157	105.735	68.3633	-0.220659	0.0898845	0.257339
HERVH_7q35a	19.7955	76.2788	8.21085	17.6146	0.316866	0.0899207	0.257339
HML5_2q14.3	27.4987	28.5663	34.9108	30.4782	-0.274475	0.090012	0.257427
MER4_3q29a	23.0645	49.9168	34.4337	63.6829	-0.336654	0.0901761	0.257724
HERVH_8q23.3f	4.14142	22.5603	13.8261	98.2718	0.258705	0.0903625	0.258084
ERV316A3_8p21.2b	5.8597	14.2146	6.59734	17.5375	0.253458	0.0905447	0.258297
MER4B_1p22.1c	8.87674	15.0798	8.65167	14.7723	0.235985	0.0905584	0.258297
MER4_8q24.3c	100.721	83.4837	110.325	77.2187	-0.257986	0.0908233	0.25888
HERVH_4q31.21b	50.0466	247.415	31.065	157.203	0.374967	0.0909321	0.259017
ERVLE_7p21.3f	19.1136	26.1419	18.9471	36.5729	0.335517	0.0910314	0.259127
HERVL_9q32	1867.31	768.224	2053.53	868.405	-0.127363	0.0911706	0.25935
HML3_12q12a	3.50782	10.1845	7.95488	46.3915	0.2255	0.0913355	0.259646
ERV316A3_2q35i	7.34724	14.3631	6.80142	12.7888	0.247094	0.0916234	0.260291
ERVLB4_10q11.22a	36.9531	72.8816	65.7853	117.159	-0.457397	0.0917805	0.260564
HERVH_5q23.1c	21.3188	153.371	6.44526	17.6786	0.283461	0.0919479	0.260866
MER101_12p13.31b	3238.35	5600.59	2350.86	2092.08	0.22203	0.092032	0.260931
HERVL_Xq27.2a	16.1861	68.9452	13.027	85.0385	0.287763	0.0925342	0.26218
HERVS71_7p14.3	2351.53	1822.13	2500.23	1509.37	-0.20453	0.0926672	0.262383
HERVH_2q36.1a	14.9525	118.913	5.92345	22.1344	0.242431	0.0928722	0.262789
MER4B_3q25.33b	8.28892	12.6192	12.8821	15.5754	-0.249654	0.0931626	0.263032
ERVLE_1p36.11b	67.7667	73.1885	75.5387	92.6374	-0.280722	0.0931731	0.263032
HERVK11_2p14	42.4502	35.8274	37.914	33.0964	0.259515	0.0932179	0.263032
PABLA_Xq23	3.79937	15.4416	24.2897	155.242	0.268078	0.0932545	0.263032
HERVH_11q23.3c	60.3216	141.615	54.9168	77.8003	-0.399991	0.0932663	0.263032
HERV3_8q11.23	363.392	692.433	286.025	333.072	-0.356581	0.0934636	0.263414
HERVFRD_8q12.1b	6.55339	30.4573	8.2741	45.3196	0.251447	0.093633	0.263717
HERVL_14q22.3b	669.401	1272.1	548.353	2033.11	0.661529	0.0937062	0.26375
HERVK11_4q13.2	41.3102	199.593	36.3003	282.022	0.358803	0.0937937	0.263822
LTR25_4q32.1	13.1516	21.1245	9.69628	14.2881	0.282128	0.0940705	0.264426
MER41_6p21.32	12.568	16.5092	18.5827	19.3527	-0.26952	0.0943506	0.264798
HERVFRD_20q11.23b	59.2778	73.467	59.5573	40.8518	-0.268369	0.094359	0.264798
HERVFH21_1q23.1	204.153	704.504	165.255	442.376	-0.489777	0.0944006	0.264798
HERVL40_2p23.3b	38.7593	32.3696	44.9431	31.9834	-0.248866	0.0944509	0.264798
ERVLE_3q13.33b	0.285503	2.10345	14.5307	160.429	0.181322	0.0945367	0.264864
HML2_12q14.1	41.0401	83.5869	43.7709	136.078	0.426192	0.0947112	0.265179
HML5_Yq11.23b	13.8183	106.135	12.4421	86.4032	0.263924	0.0949808	0.265759
HUERSP1_11p15.2b	7.04815	15.4571	6.96314	14.36	0.260221	0.0951098	0.265832
HERVFRD_Xq21.33d	3.36601	13.2849	7.61468	32.567	0.234611	0.0951815	0.265832
MER4_14q21.1a	28.7179	26.6891	34.7765	28.6496	-0.25732	0.0951935	0.265832
HERVK11_5q35.1	55.0037	65.9724	44.8471	42.7963	0.302055	0.0952671	0.265863
HERVP71A_5q14.3	45.5033	137.907	29.6367	81.1768	0.411774	0.0954336	0.266129
HML1_Yq11.21b	101.555	199.329	86.1199	152.994	0.393926	0.0955475	0.266129
HERVH_14q24.2b	24.4316	109.095	13.2214	24.0881	0.300488	0.0955493	0.266129
ERVLE_6p22.1a	127.874	231.519	91.8378	170.231	0.440387	0.0956143	0.266136
HERVH_Xq23i	5.23639	17.7302	4.85212	12.3223	0.232641	0.0957669	0.266387
HERVEA_Yq11.21	47.0263	211.511	52.1736	220.441	0.420749	0.0958509	0.266447
HERVW_15q21.2	21.3929	28.3605	18.1087	24.906	0.287061	0.0960244	0.266615
HUERSP1_7p12.3a	14.1142	27.2363	17.4934	86.9669	0.300347	0.0960924	0.266615
HERVL40_12p11.21	30.5505	29.9902	25.4814	24.6744	0.266481	0.0960989	0.266615
HUERSP3B_16p11.2a	1.0319	4.17239	33.8883	378.215	0.216166	0.0961931	0.266677
HML3_11q12.1	9.96036	14.0631	9.14867	13.27	0.246848	0.0963076	0.266677
HERVE_12q13.13	49.3593	136.896	33.2756	136.135	0.379501	0.0963089	0.266677
MER101_1p31.3	21.6637	28.5757	32.5199	46.9186	-0.318349	0.0965394	0.267143
HERVIP10F_19p13.11	259.256	218.63	278.403	181.874	-0.211494	0.0967628	0.267587
MER41_22q12.3e	638.126	485.217	673.226	416.242	-0.205884	0.0968902	0.267766
HERVL_7q32.1	165.362	489.646	110.337	416.14	0.466794	0.0970469	0.268025
ERVLE_4q21.23a	15.4241	18.0851	19.5588	18.3027	-0.247699	0.0971448	0.268122
HERVL18_2p12	18.8019	45.2879	15.8568	40.7023	0.331853	0.0974343	0.268747
ERVLE_2q33.1d	32.3948	33.4851	39.4908	31.6426	-0.254511	0.0975487	0.268889
HERVL_4q31.1	405.029	156.402	445.83	182.235	-0.130417	0.0976189	0.268909
HERVIP10FH_5q14.2	9.14122	17.4762	9.59774	26.3083	0.266598	0.097935	0.269606
HERVEA_19p13.2	32.758	36.2721	47.4286	66.789	-0.301467	0.0981147	0.269926
HERVH48_16p11.1	4.68335	28.1465	9.11484	69.1801	0.226605	0.098252	0.27013
HERVH_19q13.2b	15.0832	24.323	18.3554	23.5528	-0.253471	0.0984788	0.270579
HML5_Xq27.3	52.4174	454.235	5.6835	11.7336	0.293193	0.0985519	0.270605
HERVL_4q28.3a	5.22849	15.1762	5.83821	15.0777	0.22745	0.0987501	0.270975
HERVH_8q24.23a	5.98949	35.1353	6.97823	49.9936	0.225351	0.0989052	0.271227
HERVH_3p26.3b	6.11171	15.234	14.4952	28.2729	-0.284109	0.0989778	0.271251
MER41_9p13.3a	56.0113	116.337	54.7522	51.2152	-0.322915	0.0993569	0.272115
HERVFRD_7q36.2	74.9598	425.533	38.7011	207.036	0.374272	0.0995936	0.272539
HML3_8q11.23a	66.5387	81.9944	52.3113	67.6365	0.301309	0.0996393	0.272539
HERV30_19p13.11	54.2378	88.9189	38.2668	42.2879	0.285725	0.0998777	0.272849
ERVLB4_2p23.3	9.38576	12.965	8.94776	12.373	0.236095	0.0998804	0.272849
MER101_5q35.2d	7.31698	35.9781	4.65291	9.73317	0.221075	0.100157	0.273249
ERVLE_4q35.2c	7.38623	20.4995	7.407	21.5218	0.27237	0.100199	0.273249
HERVL_15q11.2	10.3448	67.132	11.203	66.3497	0.26063	0.100256	0.273249
ERV316A3_22q13.33b	23.7547	41.7428	39.2285	56.2781	-0.380149	0.100355	0.273249
HML1_11p15.1a	0	0	13.9621	157.767	0.180941	0.100375	0.273249
HERVH_1p34.3c	80.855	130.582	78.7736	55.334	-0.279793	0.100411	0.273249
HERVH_Xp22.32b	2.46223	10.1897	64.6479	694.768	0.244869	0.100482	0.273267
HERV30_6q22.31	11.0356	15.6006	16.1603	17.1693	-0.247049	0.100881	0.273953
HERVK11D_11q14.3	229.076	528.903	200.864	447.776	0.488364	0.100895	0.273953
HML5_1q22	651.77	1799.22	658.579	802.492	-0.266452	0.100976	0.273953
ERVLB4_1p36.11	6.73929	9.94274	11.8528	14.3225	-0.241881	0.100991	0.273953
ERVLE_9p24.1b	25.6529	47.6415	22.2779	42.6625	0.328338	0.101132	0.274163
ERVL_1q44a	65.7936	53.9422	78.441	67.1309	-0.240397	0.101379	0.27457
HERVK14C_8p11.1a	2.45754	12.9531	8.50473	56.6017	0.226317	0.101411	0.27457
HERVFC2_11p15.4	339.794	1543.48	363.636	1722.47	0.573044	0.101791	0.275424
MER4_5q35.2d	5.18822	27.541	9.10192	45.8525	0.236905	0.101968	0.275726
HERVW_2p16.2	326.817	339.81	395.468	401.349	-0.257491	0.102121	0.275966
HERVH_3q21.3a	24.6115	37.2775	35.2854	42.8354	-0.316842	0.102228	0.276081
HARLEQUIN_Xp22.2	48.5958	171.948	29.8559	40.9833	0.307676	0.102748	0.27703
HERVH_19p13.2a	136.749	179.419	151.132	163.415	-0.331956	0.102817	0.27703
HARLEQUIN_1p35.3	92.6534	62.5632	76.3594	42.7162	0.206747	0.102836	0.27703
HERVL18_5p14.3	5.04117	21.031	5.96032	18.6356	0.233246	0.102839	0.27703
HML2_7q11.21	77.4852	83.8569	96.1479	87.4851	-0.313014	0.102922	0.277078
HML6_6p21.32a	14.6401	26.9679	12.5066	22.8649	0.305229	0.103178	0.277591
ERVLE_19q13.31c	33.2264	38.6333	49.6752	67.7435	-0.313894	0.103358	0.277901
ERVLB4_4p15.2a	18.3064	21.1927	23.7108	20.8031	-0.245548	0.103476	0.278044
HERVH_4p15.33b	12.6562	42.517	10.1638	29.7705	0.262291	0.103715	0.278509
LTR23_7p11.2	4.82886	12.5948	8.43493	42.0136	0.245692	0.103823	0.278625
MER41_4q12a	11.3054	19.8459	13.6725	13.6611	-0.242796	0.103895	0.278642
ERVL_11p14.1	5.91301	11.5813	5.09691	7.57676	0.207394	0.104078	0.278957
HERVH_2q32.1c	46.7314	125.26	44.8331	69.8733	-0.390151	0.104253	0.279251
HERVH_3q26.1h	32.7112	125.822	72.4138	499.135	0.361332	0.104446	0.279594
HERV3_22q13.31	7.90668	10.6311	8.10913	11.7131	0.220729	0.105021	0.280955
ERV316A3_6p22.1l	26.1315	71.7788	42.2407	72.0231	-0.327607	0.105089	0.28096
HERVI_18q12.2	7.61415	24.4429	6.17307	14.1709	0.238691	0.105159	0.28097
MER4_1p21.3	1378.7	922.828	1146.34	663.127	0.194373	0.105224	0.28097
HERVFH21_1p36.31	26.0504	56.8322	36.7844	76.678	-0.311532	0.105751	0.282173
HERV3_19q13.42d	37.7737	44.0833	44.7628	52.5593	-0.282367	0.105807	0.282173
HERVH_19q13.41a	642.98	511.435	679.168	380.978	-0.197361	0.105932	0.28233
MER4_2q37.3b	14.8265	39.3135	12.1343	37.7256	0.271642	0.106071	0.282526
MER101_16q22.1a	27.4897	25.3039	23.9681	24.0535	0.248314	0.10639	0.283072
ERVLE_4q35.2a	7.06976	33.3515	6.92085	24.8971	0.25074	0.106409	0.283072
HML6_Xp11.21	71.2507	57.8699	80.2658	54.5725	-0.213574	0.106525	0.283205
HUERSP2_1q32.1	27.8472	224.106	5.65273	7.52883	0.23683	0.106681	0.283441
MER61_7p13	50.9077	53.3516	58.0962	52.6563	-0.284566	0.106932	0.283932
HERVH_1q31.3	84.572	255.349	100.475	350.996	-0.445477	0.107306	0.284571
HERVP71A_3p21.31	1.86296	5.74118	8.24893	68.725	0.196576	0.107306	0.284571
ERVLE_2p14a	11.5653	13.6179	16.3357	16.2995	-0.231605	0.107686	0.285401
HML6_8p21.3	25.323	23.3507	31.4304	24.3447	-0.232464	0.107892	0.285769
HERVFRD_10p11.22b	13.8326	16.0366	13.4148	18.7448	0.247973	0.108081	0.285972
MER4B_Xq21.33	31.35	58.5385	48.3939	81.5442	-0.369165	0.108103	0.285972
ERVLE_4p14d	4.89191	12.391	8.2766	10.8898	-0.210118	0.10865	0.287109
HERVH_12q22	62.6759	164.092	64.5466	154.983	-0.367295	0.108688	0.287109
HML5_2p23.3	463.632	348.926	518.937	332.624	-0.199561	0.108734	0.287109
ERVLE_10p11.22b	31.2925	27.476	36.1852	24.9793	-0.231953	0.108855	0.28725
HERVW_Yq11.222b	330.935	639.682	193.428	382.411	0.653753	0.109007	0.287475
HERV4_6q14.1	8.63266	14.3493	9.72022	26.2234	0.239362	0.109414	0.288369
PRIMA41_20q11.21	19.6145	115.907	19.8616	161.238	0.273317	0.109631	0.288474
ERV316A3_6q22.33	17.6573	22.597	25.1346	27.0419	-0.279584	0.109643	0.288474
MER4_Xq25a	13.1553	39.0594	12.1694	34.1019	0.278213	0.109773	0.288474
ERVLE_6q22.32	194.038	134.473	221.429	132.681	-0.19321	0.10978	0.288474
HERVH_6q14.1c	27.8111	44.8101	27.3502	89.5467	0.350371	0.109792	0.288474
ERVLB4_5p15.2b	17.303	27.7083	19.2236	18.0371	-0.241827	0.110707	0.290699
HERVL40_14q12	4.33572	10.191	5.58345	18.449	0.214798	0.110817	0.290809
ERVLE_16q12.1b	6.98042	18.9937	5.39714	8.30838	0.221922	0.111024	0.291175
HERVH_11p15.4b	72.7052	151.86	84.8965	106.385	-0.393336	0.111179	0.2914
HERVH_3q13.12a	19.1541	36.6283	20.7919	52.0322	0.296414	0.111512	0.292004
PABLA_2q12.3	6.31882	20.532	9.37874	32.072	0.25769	0.111546	0.292004
MER4B_19q13.42a	150.368	177.853	163.093	157.512	-0.300957	0.111808	0.292511
HERV3_3q13.2	25.86	81.0301	22.3854	24.7417	-0.288281	0.112043	0.292741
HUERSP3B_9p13.3b	11.7203	22.1737	17.9406	37.4302	-0.244579	0.112052	0.292741
HARLEQUIN_10q24.2	38.5502	43.7318	44.7857	39.9848	-0.262689	0.112102	0.292741
ERVLE_4q24h	6.49479	9.87314	10.5043	13.345	-0.208132	0.112286	0.29304
HERVFC1_2p11.2	3.13704	6.76073	6.92969	35.3017	0.208064	0.112354	0.29304
HERVH_Xp22.32a	178.606	893.091	5380.47	61941.6	0.473505	0.112532	0.293327
HERVH_2q31.1b	17.1084	23.4804	14.4924	19.6651	0.264321	0.11292	0.294158
MER41_6q23.2	8.42799	20.8802	14.9949	24.8786	-0.256066	0.113391	0.295064
ERV316A3_21q22.3a	13.6913	62.4011	6.55614	10.7742	0.235428	0.113406	0.295064
HARLEQUIN_17q25.3a	626.654	1661.75	360.001	350.936	0.277834	0.11378	0.295855
ERVLB4_18p11.32c	7.68889	26.2236	9.01066	32.0815	0.257401	0.114448	0.297411
MER4_11q12.1a	7.73071	44.8312	4.43137	10.0869	0.208715	0.114814	0.298181
HERVL_9q21.32	58.9079	44.4595	73.2041	57.5366	-0.252572	0.114992	0.298461
HML6_16p11.1	107.242	676.493	30.9577	165.329	0.348834	0.115284	0.299038
ERVLE_1p34.2g	14.9203	23.9737	21.1059	26.367	-0.248198	0.115391	0.299134
MER41_Xq13.3b	22.7645	26.4168	26.4817	20.9269	-0.232623	0.115569	0.299302
HUERSP3B_1p35.1	23.8135	30.1475	32.6082	40.5788	-0.283753	0.115596	0.299302
MER61_1q25.1c	15.5143	18.7899	21.3014	20.4335	-0.232949	0.11605	0.300294
HERVH_3q13.2	200.178	762.73	233.635	658.164	-0.480542	0.116336	0.300852
HML3_19p12f	83.288	535.983	141.902	1084	0.352206	0.11642	0.300887
HML2_5q33.3	9.48182	40.58	35.7411	314.963	0.268644	0.116624	0.301132
MER4_5p13.2a	116.099	300.018	105.382	238.281	-0.385187	0.116656	0.301132
MER61_7q11.21	40.5549	40.7337	44.6985	34.8372	-0.247737	0.117106	0.302112
HARLEQUIN_1q24.2	15.1334	83.2669	5.45341	7.65767	0.225161	0.117298	0.302253
LTR25_14q24.2	52.2726	60.244	55.4917	53.1964	-0.273516	0.117303	0.302253
ERVLE_8q24.13f	35.558	55.3987	27.9553	29.6951	0.250966	0.117453	0.302458
HML6_14q24.2	128.444	389.87	155.271	641.689	-0.334618	0.118055	0.303825
HERVH_1p13.2a	4.22915	9.02173	5.90128	18.6763	0.210001	0.118302	0.304277
HERVIP10F_8p11.22	57.9281	250.495	43.6365	160.301	0.395057	0.118539	0.304702
MER101_6q25.3b	17.4237	55.8608	11.6275	24.5517	0.283215	0.118671	0.304788
HERVL40_Xp11.3	29.1869	28.5532	36.348	34.5908	-0.253356	0.118715	0.304788
ERVLE_13q14.13	380.87	230.717	397.137	173.158	-0.177889	0.118892	0.304912
HUERSP1_4q21.22	17.7347	25.5238	16.9796	26.9321	0.277172	0.118906	0.304912
HERVK14C_10q26.3	13.226	107.898	7.659	33.9157	0.233662	0.119051	0.305101
ERVL_6p24.2	7.54029	14.8402	8.46129	18.3662	0.238319	0.119238	0.305394
MER41_14q32.13	16.9935	23.9386	23.8273	31.2567	-0.275234	0.119527	0.305951
ERVLE_6q21a	10.1049	11.6117	10.2441	12.4458	0.218368	0.119668	0.306128
PRIMA4_2q24.3	35.9567	42.1672	30.0427	31.355	0.275362	0.120023	0.306853
ERVLB4_2q31.1	33.764	123.412	32.7258	110.538	0.366838	0.120298	0.307373
HERVH48_8q21.2	74.2399	67.1509	81.2893	64.7825	-0.269227	0.120617	0.308002
ERVLE_8p12c	8.0174	13.6909	7.64867	10.9216	0.217833	0.120697	0.308024
HUERSP3B_12q23.3a	63.2653	268.407	28.7261	39.4776	0.320348	0.120808	0.308123
MER101_1p22.2a	60.8599	48.5342	77.0305	61.408	-0.24863	0.121032	0.308365
ERVLB4_3p14.2	151.522	322.041	73.1106	138.257	0.390901	0.121099	0.308365
ERVLE_22q11.22a	13.8041	31.6936	36.3699	76.5376	-0.35426	0.12112	0.308365
HARLEQUIN_10q22.1	39.0551	46.1376	33.5984	54.7573	0.298626	0.122546	0.311484
ERV316A3_2p15a	13.1664	32.5332	9.27125	16.001	0.253955	0.122563	0.311484
LTR46_Xq11.1	11390.1	4712.53	10325.1	4243.85	0.116132	0.122592	0.311484
ERV316A3_3p25.2a	61.1673	46.4704	72.1789	58.9717	-0.21791	0.122637	0.311484
HUERSP3_12p13.31	10.581	27.0609	9.92442	32.0585	0.269154	0.123063	0.31238
MER61_4q32.1d	10.9721	18.0802	10.0936	14.9363	0.243837	0.123267	0.312712
HERVH_9p24.2c	32.1664	186.799	29.008	188.84	0.318227	0.123472	0.313046
ERVLB4_8q23.3c	7.54307	19.3919	15.5974	121.103	0.244011	0.123622	0.313239
HERVL_5p14.1g	26.8982	130.338	34.5703	162.118	0.32278	0.123841	0.313608
HERVP71A_7p15.3a	62.139	54.1757	71.1458	49.218	-0.225508	0.123948	0.313693
ERVLE_12p13.2c	4.91741	8.59537	5.43874	8.90693	0.187051	0.12403	0.313713
ERVLE_4q35.2b	6.71056	14.9309	6.38006	13.263	0.234373	0.124256	0.313957
MER4_Xq28f	24.0273	33.3757	18.5299	21.2885	0.248585	0.124273	0.313957
ERVLE_18q21.33	5.59834	10.3651	9.95105	13.3088	-0.209966	0.124571	0.314431
MER101_12q13.3	5.50911	13.8608	5.39062	10.9785	0.222285	0.124608	0.314431
MER4_Xq28e	7.98751	20.5547	6.54256	12.8871	0.231006	0.12496	0.314927
HERVK11_2q34a	80.1213	85.4787	89.3678	83.7542	-0.264396	0.124995	0.314927
HERV9_Yq11.23a	5.96587	25.236	4.54526	13.7831	0.214732	0.125071	0.314927
ERVLE_22q13.31e	8.57339	21.3396	11.6748	35.2853	0.262075	0.1251	0.314927
HARLEQUIN_5q23.1	11.2663	18.3722	10.377	17.0279	0.237271	0.125221	0.315046
HERVFH21_16p11.2	375.591	197.496	407.927	186.833	-0.138755	0.125352	0.315087
HML1_1q42.12	105.015	318.983	124.314	348.709	-0.327904	0.125427	0.315087
HUERSP1_11q22.3b	22.3945	24.7823	18.3649	18.4334	0.244146	0.125459	0.315087
PABLA_Xp22.2	45.9329	38.9134	58.4506	48.1154	-0.234304	0.125656	0.315397
HERVL_Xp11.23	59.3335	44.6959	68.4781	43.7972	-0.225959	0.125857	0.315717
ERVLB4_12p12.3d	10.9197	34.0258	10.5916	41.7679	0.267397	0.126002	0.315893
HERVL18_5q21.3	14.9669	33.3112	11.6109	28.249	0.279352	0.126113	0.315986
HERVH_2p11.2a	2.9565	17.9809	9.97663	77.4597	0.193801	0.126372	0.31645
HERVH_9q21.33a	194.257	1711.42	105.146	857.951	0.366787	0.126883	0.317542
HERV3_Yq11.223b	24.7253	77.7162	29.2886	164.435	0.336117	0.127347	0.31836
MER4_1p34.1c	144.167	91.7185	163.552	93.3557	-0.179096	0.127389	0.31836
HERVS71_8p23.1b	92.2735	107.16	122.704	133.674	-0.394977	0.127433	0.31836
HARLEQUIN_1p36.33	6175.74	6360.62	6323.39	5333.18	-0.297886	0.128028	0.319632
HERVH_16p12.3	62.0432	112.669	87.1575	150.438	-0.324261	0.128093	0.319632
ERVLE_3q26.1a	34.2349	100.986	23.9988	60.6544	0.351084	0.128324	0.320022
HERVL_8q22.2	293.872	232.101	335.757	322.188	-0.247104	0.128437	0.320117
ERVLE_11q14.2c	38.704	39.4265	35.2666	47.4733	0.278769	0.128961	0.321237
MER41_4p15.2	208.086	190.908	167.423	140.771	0.22277	0.129088	0.321364
HML3_2p24.1	19.8662	21.7401	24.5179	23.2891	-0.232094	0.129282	0.32166
HUERSP3_11q13.4	267.751	183.32	286.674	163.962	-0.16675	0.129492	0.321994
HML1_19p13.2	36.4949	30.5271	42.7481	29.814	-0.234674	0.12967	0.32225
MER61_7q21.11	78.7551	179.351	59.8717	181.935	0.416679	0.129902	0.322637
MER61_1p22.2a	15.5125	30.2458	15.0632	28.9428	0.281955	0.130227	0.323211
HERV9_3q25.1	22.6014	54.9994	55.9179	221.166	-0.332322	0.130336	0.323211
ERV316A3_6p22.1i	313.453	443.641	208.743	285.847	0.420277	0.13036	0.323211
ERVLE_1p36.13b	402.18	253.505	355.985	235.69	0.19371	0.130446	0.323237
MER4_4p12b	90.3216	148.462	64.2522	111.357	0.341679	0.130567	0.323348
ERVLB4_6p23	21.0011	31.0673	25.7787	26.624	-0.266883	0.13074	0.32359
HERVH_3q11.1	82.6808	88.2241	101.537	96.0506	-0.273144	0.131349	0.324907
HERVH_Xq23a	3.43796	19.889	16.3464	171.916	0.202575	0.131949	0.32612
ERV316A3_6q14.3e	11.3032	39.2036	7.69988	21.6495	0.247233	0.131992	0.32612
HUERSP3B_3q26.31a	34.1952	57.669	40.9008	44.7329	-0.282388	0.132168	0.326367
ERV316A3_2q35f	135.855	129.895	141.681	132.909	-0.268134	0.132385	0.326714
HERV9_12q23.3	13.6843	41.5424	26.251	151.024	0.289763	0.132868	0.327707
HERVE_8p23.1g	14.6386	45.8227	13.4449	36.89	0.296165	0.132941	0.327707
MER61_2q31.1b	17.1386	27.9665	22.4781	28.8388	-0.277743	0.133516	0.328935
HERVFRD_Xp21.1	5.99664	18.8769	8.99268	33.5032	0.237493	0.133609	0.328972
PRIMA4_1q21.2d	74.9881	162.287	91.3791	123.738	-0.431633	0.133849	0.329374
ERVLE_17p13.1	7.07215	13.3478	6.58848	10.9376	0.209461	0.134571	0.330958
HARLEQUIN_12q13.12	14.5091	69.7374	8.17274	30.3095	0.239829	0.134738	0.330962
HML5_12q22	5.99885	14.0302	7.27758	17.3143	0.220018	0.134778	0.330962
HERVL18_2q31.1	98.548	185.649	69.9895	133.476	0.291733	0.134805	0.330962
MER41_Xp11.21i	31.0988	34.221	34.4774	27.2369	-0.233723	0.134979	0.3312
HERVFRD_8q12.1d	18.1232	90.983	23.4267	114.536	0.287102	0.135157	0.331446
HERVH_18q12.3c	11.7623	85.2142	13.9759	92.2968	0.221866	0.135294	0.331592
HERVFH21_14q32.31b	34.0853	36.1349	38.4819	32.867	-0.245571	0.136073	0.333309
HERVH_12p13.31b	40.3703	44.4251	55.9354	74.578	-0.305543	0.136227	0.333494
ERVLE_7p21.3b	172.222	254.79	120.932	190.052	0.497319	0.136474	0.333908
HUERSP3_10q23.33b	6.98889	13.6761	7.59409	13.5327	0.203722	0.136698	0.334263
HERVH_2p16.3a	22.3577	43.5228	52.8986	338.418	-0.270393	0.13747	0.335934
HERVH_11q21a	15.5321	44.8832	17.0858	54.5679	0.285793	0.137539	0.335934
HERVL_18q12.2b	4.56975	15.4355	6.01336	18.7635	0.209028	0.137658	0.336032
HERVH_3q13.31b	447.431	3885.86	30.8067	62.5955	0.364442	0.137736	0.336032
ERVLB4_6q21b	7.99455	20.4747	12.3118	16.141	-0.240057	0.137973	0.336416
MER61_4q31.21a	32.1619	41.8695	41.7069	54.6179	-0.290768	0.138157	0.336436
HARLEQUIN_10q21.2b	230.584	2318.63	26.4187	237.522	0.26218	0.138189	0.336436
HARLEQUIN_5q14.2	4340.83	3398.57	3902.96	3209.95	0.237716	0.138217	0.336436
HERVP71A_6p22.1	189.714	174.845	219.481	194.397	-0.232166	0.138316	0.336485
ERV316A3_10p14b	3.38072	11.9514	7.52776	31.1063	0.21422	0.138666	0.336893
ERVLE_9q21.13a	5.08875	9.53006	5.22465	8.91629	0.210957	0.138675	0.336893
MER61_5q23.1	6.11339	11.1449	5.74931	8.5201	0.199151	0.138721	0.336893
HERVH_9q22.33a	9.89932	21.2292	17.5945	73.2741	0.269759	0.138889	0.336993
ERVLE_4p16.1b	65.0198	73.1737	54.6968	60.9762	0.266936	0.13892	0.336993
HERVL_6p12.3b	48.1895	35.8811	57.1864	35.7575	-0.216429	0.139326	0.337687
ERV316A3_9q33.2	17.7694	25.6404	20.0854	39.1664	0.284026	0.139364	0.337687
ERVLE_8p12b	6.49884	10.5192	6.46965	9.31136	0.20164	0.139486	0.33779
HERVFH21_Yq11.21	5.22314	17.6611	7.08031	25.9554	0.215111	0.139894	0.338262
ERVLB4_Xp21.1e	25.8815	27.67	23.2142	28.3527	0.253047	0.139923	0.338262
HERVL_9q21.11a	516.434	1502.58	216.318	631.507	0.579637	0.139936	0.338262
ERVLB4_4q32.3c	8.11027	11.9321	7.96598	10.8759	0.20696	0.140039	0.338262
HERVIP10F_19p13.2b	101.479	137.342	120.282	181.582	-0.329449	0.140077	0.338262
HERVH_5q21.1a	21.597	51.4135	12.0272	21.2965	0.261886	0.140205	0.33838
ERVLE_2q37.3f	11.2984	43.7603	7.13075	9.74444	0.204655	0.140759	0.33943
HERVIP10F_19q13.41a	788.432	622.438	651.631	482.758	0.204632	0.140903	0.33943
MER4B_17p11.2a	17.3492	21.8039	28.8047	55.6347	-0.265805	0.141039	0.33943
HERVL_14q24.2c	8.49669	11.2389	15.179	20.1287	-0.220897	0.141131	0.33943
ERV316A3_2q34f	16.0919	18.1454	24.1735	25.0751	-0.241169	0.141239	0.33943
MER101_7q22.1a	100.151	77.6677	94.2801	80.3254	0.219195	0.141245	0.33943
HERVIP10FH_7q22.1	73.6202	81.4418	60.8408	63.7236	0.262941	0.141264	0.33943
ERVLB4_8p11.21a	6.67553	31.4007	4.71908	16.7724	0.210167	0.141277	0.33943
MER4_Xq21.33d	5.85333	16.9883	5.49741	13.6008	0.212888	0.141766	0.340414
HUERSP1_12q22	6.86027	11.4758	7.17364	12.3559	0.204591	0.141852	0.340429
HERVH_11q13.3a	6.62108	38.329	4.6895	15.5943	0.196397	0.142254	0.341201
MER4_16q23.1b	13.4974	29.582	13.2912	32.5794	0.262747	0.142357	0.341256
HML3_17q21.32	4432.83	13232.2	1530.47	5064.9	0.662643	0.14268	0.341695
HERVW_1p33a	27.3566	32.7801	37.3839	66.4358	-0.252084	0.1427	0.341695
ERVLB4_7q21.3b	88.7523	95.5825	91.4859	81.8609	-0.303351	0.142885	0.341775
HERV3_11q13.3	932.649	1508.9	658.258	934.318	0.259596	0.142893	0.341775
MER61_13q22.1	23.8049	56.3989	20.1037	51.3081	0.280424	0.143072	0.34201
ERVLE_4q21.23c	6.18412	10.0146	6.34449	9.43582	0.189789	0.143326	0.342411
HERVL18_6q25.2	120.799	727.829	45.4238	198.078	0.363476	0.1434	0.342411
ERVLE_3q11.1	8.73999	12.3056	8.52938	11.3031	0.210602	0.143629	0.342766
MER61_2p24.2	19.8191	37.2785	18.9901	47.6885	0.281911	0.143846	0.34285
HERVL40_12p13.2a	6.02255	10.9536	6.38536	11.4052	0.201405	0.143876	0.34285
MER4_7p22.1	242.713	330.926	327.427	482.157	-0.329873	0.143986	0.34285
HERVH_1q31.1a	142.949	407.695	163.332	373.454	-0.440335	0.144008	0.34285
ERVLE_5q35.1b	7.25271	26.2401	6.61168	21.8601	0.231451	0.144066	0.34285
LTR25_9p11.2b	11.4304	17.4808	12.5307	21.3947	0.250203	0.144524	0.343593
HUERSP1_7q21.12	89.316	146.032	135.806	206.792	-0.342762	0.144542	0.343593
MER4B_1p22.1b	5.64925	9.54307	5.91399	9.55829	0.188471	0.144656	0.343593
MER4_14q11.2b	2.9232	18.1621	7.08011	43.9102	0.188299	0.1447	0.343593
ERVLE_11q24.3e	46.8402	98.222	32.4092	78.0741	0.35921	0.145118	0.344307
MER61_3p12.2	4.63725	26.6893	6.44478	32.5908	0.198556	0.145162	0.344307
HERVH_19q12	12.045	43.2769	10.2895	31.7132	0.25846	0.145348	0.344556
MER4_20p11.21b	22.8618	24.1959	29.0478	28.9554	-0.241316	0.145539	0.344816
HERVIP10FH_Yq11.222b	23.6923	41.9615	20.4939	36.5346	0.32597	0.145769	0.34517
ERVLB4_7q34b	5.89286	9.52748	6.45147	10.1897	0.203845	0.145908	0.345308
ERVLB4_10p14	29.7256	75.7552	38.7466	74.1111	-0.294399	0.146135	0.345652
HERVFRD_7p13	5.7994	8.77833	11.227	17.3604	-0.197023	0.146332	0.345928
HERVE_6q15	767.037	4641.72	73.7467	263.454	0.42196	0.146975	0.347073
MER4_15q22.31b	56.8228	46.3013	69.2213	52.7472	-0.23538	0.146979	0.347073
MER34B_1q24.2	11.2024	13.0803	14.9115	15.0066	-0.198047	0.147201	0.347403
HERVH_3p12.3d	10.2915	21.0457	10.0232	20.6315	0.255187	0.147613	0.348183
HML3_19p13.2a	100.486	130.773	115.507	153.365	-0.307554	0.147735	0.348278
MER101_13q34b	5.56438	8.38546	6.34619	9.85877	0.187279	0.14785	0.348358
MER61_4p15.2	12.899	28.9648	15.4023	51.2996	0.2704	0.148271	0.349047
ERVLE_9q32a	5.84795	12.942	11.053	17.2717	-0.212292	0.148376	0.349047
HERVFH19_1p36.23b	10.5448	22.7393	8.72647	14.6655	0.224825	0.148498	0.349047
HERVL18_12q21.31	57.1308	178.202	223.653	2229.26	0.371644	0.148578	0.349047
HERVH_5q13.3b	17.9815	51.1519	21.3897	25.4217	-0.247279	0.148613	0.349047
HML3_19q13.31	211.389	435.242	127.073	90.4873	0.213833	0.148633	0.349047
HERVH_11q13.4b	8.1325	18.9221	7.30477	14.8589	0.221364	0.149193	0.350168
HERVH_9q21.32a	4.48955	16.6453	43.4738	216.555	-0.276703	0.149362	0.350259
ERVLE_22q13.2c	7.35383	10.7008	7.39074	9.95891	0.193819	0.149396	0.350259
HARLEQUIN_11q21	10.1376	16.3274	8.90351	13.7222	0.224924	0.149605	0.350498
MER41_Xp22.2	37.7155	37.5069	36.2555	45.2856	0.245396	0.149662	0.350498
ERVLE_1p22.1b	5.24913	13.3978	8.40934	12.0527	-0.197836	0.149843	0.350719
HERVE_17q11.2	1796.59	2082.27	1921.95	1892.83	-0.290494	0.149921	0.350719
HERVIP10FH_12p12.3	2.25433	8.61011	24.6355	177.762	0.216891	0.150025	0.350744
MER4_2q14.1b	114.231	116.492	92.2101	102.75	0.261286	0.150096	0.350744
MER41_9q31.1a	22.218	23.5456	26.5443	22.215	-0.222467	0.150271	0.35089
MER4_10q23.31b	10.3347	14.5228	9.32908	12.5787	0.215522	0.150323	0.35089
HERVL40_20q11.22	299.055	555.561	203.918	409.748	0.328721	0.150611	0.351217
HERVH_1q25.2	103.903	890.778	19.5225	60.3076	0.315427	0.150627	0.351217
HERVH_11q13.3c	8.04529	17.5326	7.84086	13.3273	0.217085	0.150857	0.351561
HERVH_5q32b	1068.43	3418.24	2625.51	8865.1	-0.559821	0.150943	0.351568
HERVL_Yp11.2a	16.9368	28.7438	20.3047	42.4153	0.301355	0.151392	0.35228
HUERSP3_5q21.2	10.4218	21.0713	11.2515	23.536	0.249959	0.151432	0.35228
HERVH_19p12b	573.826	1510.38	3433.81	21203.9	-0.589276	0.151496	0.35228
ERVL_1q42.13	8.93975	11.863	8.7626	11.9185	0.204929	0.152138	0.353542
HERVE_11p15.4	5381.81	4897.15	6715.61	7253.43	-0.288121	0.152264	0.353542
ERVLB4_3q13.31	12.0325	13.4136	18.6892	24.4887	-0.214143	0.152288	0.353542
HML5_13q12.13	27.9886	35.7565	49.3948	133.704	-0.28002	0.152939	0.354861
MER4_19q13.41a	6.73464	12.0395	6.61477	11.3671	0.216461	0.153085	0.355008
MER61_2p21	9.4178	12.4352	8.65183	10.2521	0.192334	0.153231	0.355153
HERVE_11q13.2b	8980.72	8712.72	10267.7	8854.58	-0.304595	0.153393	0.355303
HERVIP10FH_16p12.3	9.18792	14.9978	13.3291	18.088	-0.199909	0.153462	0.355303
HERVW_6q14.3a	74.5957	172.599	47.2037	108.156	0.389771	0.153673	0.355494
HERVL_18q21.2a	80.4382	55.4908	93.7849	58.1851	-0.194349	0.153711	0.355494
ERVLE_12p13.31c	25.2493	50.978	19.0394	28.2703	0.257027	0.153819	0.355551
HML5_Yq11.223g	9.75827	20.258	11.0757	23.0146	0.246947	0.154094	0.355811
HERVS71_3p12.3	16.4828	20.4973	26.6183	33.579	-0.253617	0.154153	0.355811
ERV316A3_8p11.23b	5.43397	12.6834	5.8748	13.2926	0.207168	0.154253	0.355811
HML3_3q13.33	7.60742	16.1095	7.50899	15.9941	0.213745	0.154265	0.355811
HERVL_5p13.2c	26.3305	41.9364	28.3526	30.9967	-0.247255	0.154442	0.355899
HERVFRD_8q21.13b	6.67325	58.8162	6.37341	28.7804	0.195659	0.15447	0.355899
ERV316A3_1p36.22a	39.993	128.25	75.8482	221.215	-0.351331	0.154715	0.35627
HERVH48_2q22.2	545.746	1432.64	293.185	542.367	0.363979	0.154837	0.356359
HML6_8q12.1	33.359	67.5776	32.5671	80.1661	0.313804	0.155143	0.356871
HML3_Yq11.221b	23.0921	39.7035	22.8423	44.8397	0.314506	0.155459	0.357404
HERVH48_2p25.1	8.26407	11.835	7.89601	10.829	0.198651	0.155851	0.358113
ERV316A3_1p32.1a	45.4633	38.1938	54.8171	40.1367	-0.208372	0.156076	0.358437
HERVIP10F_6q15	14.8595	17.7108	19.3749	19.2882	-0.21252	0.156214	0.358561
ERVLB4_1p22.3a	5.12561	9.88647	5.59318	11.4477	0.190144	0.156613	0.358975
ERV316A3_14q23.1e	15.9705	25.1984	22.0447	25.5756	-0.24293	0.156643	0.358975
HERVL18_4p15.2a	81.715	311.248	54.0043	198.642	0.377962	0.156714	0.358975
ERVLE_2q35a	27.8756	30.3289	23.9432	27.1249	0.249565	0.15676	0.358975
ERV316A3_4q31.1b	25.0077	27.0569	31.2894	30.6988	-0.249158	0.156815	0.358975
MER4_Yp11.2b	78.5414	74.9667	62.0927	62.25	0.285069	0.157056	0.359113
HML4_12q13.3	4.10974	7.41108	5.77763	17.1162	0.185461	0.157079	0.359113
MER61_1q31.1a	92.5141	462.793	40.5911	134.919	0.366829	0.157128	0.359113
MER4_4q31.3b	9.65197	12.8082	9.73356	13.0984	0.193299	0.157538	0.359859
MER4_5q35.3a	14.2918	25.5614	11.0006	20.2126	0.230196	0.158053	0.360842
HERVH48_11p15.4	12.052	15.1704	17.1813	18.5692	-0.220292	0.158557	0.361797
ERV316A3_2q31.2	7.30028	9.19792	7.25143	8.39344	0.180174	0.158779	0.362112
MER4_17q22	5.67284	15.1873	4.95183	8.11343	0.178542	0.158939	0.362282
HERV9_Xq23b	350.532	1221.9	286.881	1033.77	0.416617	0.159082	0.362414
HERVW_8q24.13	83.1512	252.669	54.7659	146.085	0.375421	0.159188	0.362464
HERV3_7q34b	18.1348	27.9695	15.7019	25.7104	0.230474	0.159612	0.363234
ERVLB4_11p15.5d	39.2202	43.1101	45.8467	36.8619	-0.233099	0.159752	0.363359
ERV316A3_13q32.1b	36.4946	27.5007	34.4723	28.515	0.213406	0.159942	0.363597
HERVH_14q32.2c	6.17892	12.998	6.6308	13.2572	0.209836	0.160175	0.363934
ERVLB4_13q31.2i	12.3747	57.3476	18.0344	100.603	0.260939	0.160287	0.363994
ERVL_4q31.22	5.05402	16.5923	7.33418	32.9593	0.20317	0.161207	0.365887
HERVP71A_13q21.32	446.038	2677.39	109.399	508.79	0.409751	0.161764	0.366958
HML1_6q27a	337.999	775.783	570.126	1167.85	-0.465052	0.161857	0.366973
HERVL_1q31.2c	15.951	38.8008	18.131	25.4226	-0.23621	0.162395	0.367814
MER41_3p22.1a	7.78145	11.5362	7.64412	11.3666	0.195862	0.1624	0.367814
MER4_12q21.32c	13.0323	16.2943	13.1964	20.6025	0.221631	0.162757	0.368406
HERVL_Xq28b	32.567	39.4297	34.2746	27.9443	-0.219555	0.162957	0.368406
ERVLE_17q21.31	50.9246	82.4653	69.1183	127.274	-0.320901	0.16304	0.368406
MER4_17q11.2b	20.0773	25.5923	24.6758	27.5923	-0.228883	0.163091	0.368406
HUERSP3B_1q32.2	188.64	1332.31	23.0826	93.6701	0.279359	0.163127	0.368406
HERVL_1p34.2	5.30005	11.2973	39.9615	345.191	-0.227092	0.16326	0.368406
MER4B_Xq26.2a	468.366	624.302	371.008	584.769	0.368348	0.163296	0.368406
ERVLB4_13q12.12a	95.8897	149.241	78.5972	156.848	0.322416	0.163421	0.368406
HERVL_6q27g	21.6539	82.7505	13.1826	16.6308	0.241237	0.163439	0.368406
HERVW_21q21.3	12.8732	85.3742	26.168	166.615	0.24101	0.164717	0.371092
MER41_17q23.3b	56.1999	121.02	42.668	84.4878	0.324322	0.165371	0.372367
ERV316A3_5q14.1	118.389	89.6604	100.542	78.1552	0.180271	0.165558	0.372592
MER4_6q14.2	51.0606	32.9647	57.0701	34.5118	-0.176852	0.165696	0.372707
HERVH_7q31.33b	6.70198	11.9645	7.368	13.2631	0.211107	0.165836	0.37276
HERVH_7q34d	8.90523	14.7633	9.6857	18.6639	0.204777	0.165895	0.37276
HERVIP10FH_10p11.23	53.2493	85.5567	52.4967	31.7745	-0.204543	0.166423	0.373615
HERVL40_7q21.3	5.45083	11.2533	5.41074	8.86449	0.17611	0.166511	0.373615
PRIMA41_20q11.1a	7.29058	35.7543	8.11631	41.6193	0.19523	0.166545	0.373615
ERV316A3_6p22.1f	6.74996	12.2669	7.13687	11.318	0.193455	0.166625	0.373615
ERVLE_21q22.11e	7.59379	16.7612	9.29349	27.0463	0.225287	0.16688	0.37399
MER61_8q23.1b	12.0371	16.7685	11.9601	15.6277	0.207171	0.167171	0.374434
HERVH_20q13.12b	7.27502	51.4964	5.09595	31.311	0.183722	0.167254	0.374434
ERV316A3_10q11.21c	43.6992	64.7437	57.1851	97.6289	-0.320992	0.167413	0.374594
HERVH_10p12.31	26.2137	36.8284	28.8887	29.8718	-0.254852	0.1677	0.374903
ERV316A3_2p24.3b	17.2219	72.6817	13.9661	65.9332	0.25306	0.167747	0.374903
HUERSP3_7q31.1	41.5656	69.0302	43.2409	39.5032	-0.252939	0.167981	0.374903
ERVLE_5q22.2b	5.66673	10.7195	9.57656	13.5506	-0.207474	0.168005	0.374903
HERVH_3q27.3a	38.8752	126.727	24.5075	73.8939	0.325664	0.168029	0.374903
ERV316A3_4q31.23c	117.001	163.44	138.231	174.351	-0.360838	0.168142	0.374903
HERVL74_7p14.1	93.1042	79.9684	103.682	68.0572	-0.221874	0.168188	0.374903
HARLEQUIN_Xq23b	542.453	989.802	619.245	654.667	-0.287706	0.168265	0.374903
HERVL_5p14.3d	24.0076	102.483	11.5003	47.3277	0.254724	0.168342	0.374903
ERVLB4_5q12.3a	18.3665	20.8121	28.6426	31.883	-0.239035	0.168524	0.375112
ERVLB4_3q29b	88.0201	152.259	101.414	123.474	-0.269554	0.168873	0.375483
ERVLB4_1q42.13b	47.129	37.516	43.0094	35.5022	0.213421	0.168991	0.375483
ERVLB4_3q13.13	26.0955	41.0605	35.1092	54.5974	-0.262685	0.169058	0.375483
ERV316A3_12p12.3c	139.888	137.095	123.316	134.907	0.232694	0.169111	0.375483
HERVH_12p13.1b	11.921	17.1491	20.0664	46.7196	-0.228361	0.169147	0.375483
HUERSP2_7p12.3	3.53112	8.89313	6.48635	21.9794	0.187863	0.169218	0.375483
ERVLE_18q11.2c	5.26331	9.68747	5.01951	6.88173	0.166323	0.169658	0.376202
HUERSP3B_Xq13.2a	23.5606	27.7407	26.4227	26.3084	-0.22979	0.169793	0.376202
ERVLE_8q13.2a	12.0058	20.0467	19.0428	25.907	-0.243503	0.169876	0.376202
MER4_1q44a	85.1296	231.129	45.919	121.701	0.375269	0.169925	0.376202
HERVL_17q11.2	132.022	92.753	146.358	98.2233	-0.185209	0.169983	0.376202
ERV316A3_4p15.2c	7.43347	11.7761	9.04731	19.4377	0.198015	0.170309	0.376497
MER41_3q21.3a	20.2027	35.4062	27.937	46.5105	-0.273521	0.170325	0.376497
HERV3_21q22.13	257.475	325.08	176.573	192.369	0.305079	0.170381	0.376497
HERV30_4q13.2d	7.47416	29.7662	14.8407	76.3551	0.233131	0.170499	0.376515
ERV316A3_3q29	26.6436	33.7677	34.3694	38.929	-0.255699	0.170677	0.376515
ERVLB4_7q22.1a	42.0926	71.7695	30.7601	28.4481	0.206443	0.170751	0.376515
HERV4_13q32.3	3148.51	2826.85	2382.4	1786.28	0.221119	0.170809	0.376515
ERVLE_2q31.2	26.2368	24.2473	24.8426	27.6824	0.220676	0.170831	0.376515
ERVLE_5q13.2a	68.5788	52.9592	79.3186	53.919	-0.211671	0.171338	0.37744
MER101_19p13.2	13.3809	19.9378	12.1865	22.5613	0.214311	0.17167	0.377976
HERVL_5q12.1a	10.1839	36.0394	8.30474	21.2892	0.218259	0.171917	0.378324
ERVLB4_12p13.2b	8.86755	12.0846	9.38502	13.0588	0.186342	0.172289	0.378946
ERVLE_16p12.1b	54.8063	46.5702	59.5952	38.2818	-0.207809	0.172821	0.379921
ERV316A3_8q24.12c	44.3903	42.3847	49.2861	40.76	-0.218039	0.173126	0.38033
ERVLE_7q31.32b	21.2186	31.3745	27.3086	40.2665	-0.244462	0.173185	0.38033
HML3_8q24.13	73.722	309.475	50.8405	76.2294	-0.301063	0.173463	0.380743
ERVLE_Xq27.3b	7.33314	12.2223	6.68815	8.47508	0.186393	0.173686	0.381038
ERVLE_1p13.2a	145.805	102.813	178.605	136.901	-0.202835	0.173914	0.381341
ERVLE_19q13.42	131.237	330.249	58.1027	74.9035	0.311753	0.17471	0.38289
ERVLE_15q24.3d	8.9545	11.6924	9.57394	13.4652	0.195668	0.175046	0.383149
PABLA_6p21.2	2.71038	6.2703	8.92162	25.9115	-0.179859	0.175058	0.383149
LTR57_22q11.21	60.1955	55.1427	52.1884	61.3904	0.261007	0.175098	0.383149
ERV316A3_11p15.4a	4.48066	7.21535	5.54253	9.12944	0.159456	0.17529	0.383239
ERVLE_20p13b	4.05918	7.37557	8.26608	11.6374	-0.175578	0.175318	0.383239
ERVLE_9q31.3	6.14257	13.025	10.4427	15.0343	-0.205237	0.175427	0.383281
HERVK11_8p23.1c	154.42	179.777	201.507	222.864	-0.375741	0.175716	0.383716
HERVL32_6p22.3	41.304	207.962	59.7772	322.442	0.287569	0.176165	0.384499
ERVL_Xp11.21a	15.6223	14.9621	15.1982	15.7061	0.206285	0.176454	0.384932
MER41_17p11.2a	14.2522	13.5626	20.3752	18.49	-0.198387	0.176943	0.385802
HERVH_1p13.1a	127.485	1274.02	7.94691	31.3372	0.217375	0.177061	0.385864
HERVL_4p15.2c	15.4976	38.3585	20.1374	79.1917	0.258512	0.177211	0.385985
LTR25_Xq22.2a	10.9458	17.0242	10.2965	13.9074	0.199066	0.177365	0.385985
MER61_19p12c	231.196	294.074	307.499	553.38	-0.387572	0.177388	0.385985
PRIMA41_4p16.3	29.2796	39.2039	35.6036	39.1897	-0.270417	0.177492	0.386013
HML5_7p14.1	15.2507	28.6248	22.5456	33.6218	-0.236476	0.177895	0.386692
ERVLB4_11p15.4a	5.1623	10.798	5.97571	11.3056	0.186316	0.178167	0.387086
HML6_14q12b	34.2083	96.1169	29.4552	69.5876	0.31672	0.178487	0.387411
ERV316A3_15q26.2c	15.3864	77.9773	38.7453	230.033	-0.258553	0.178498	0.387411
HML3_5p15.33c	11007.8	14217.5	11050.1	10803.1	-0.235808	0.178692	0.387635
ERV316A3_2q35j	8.46481	20.4591	8.732	20.2403	0.214155	0.179095	0.388312
HML3_15q26.1	9.75529	12.293	9.66884	12.4209	0.19999	0.179412	0.388802
HML1_Xq26.3	8.42008	37.8218	9.59897	51.3029	0.2101	0.180169	0.390103
HERVH_6p25.2	8.3126	14.4311	8.69239	14.5559	0.200902	0.180195	0.390103
PRIMA41_1q42.13c	8.39899	23.543	8.03413	19.4702	0.211953	0.1806	0.390431
HERV4_2q31.1	14.6862	14.1703	15.1825	15.338	0.193985	0.180605	0.390431
HARLEQUIN_7p15.3	90.3171	75.1735	78.042	58.8162	0.209359	0.180681	0.390431
HERVH_8p23.1c	61.4722	104.62	83.0913	89.8939	-0.346149	0.180713	0.390431
HML5_15q14	7.70392	11.2181	11.8811	12.9968	-0.190602	0.180911	0.390662
HERVH_1q32.2a	7.43676	19.6558	6.6348	15.0121	0.210133	0.181072	0.390775
HERVH_11q24.1b	64.0338	401.847	15.2645	37.4687	0.266909	0.181197	0.390775
ERV316A3_5q23.1b	13.7464	16.0815	13.9289	18.5786	0.207568	0.181262	0.390775
HUERSP3B_3q26.31b	19.0515	28.538	26.7941	35.031	-0.235312	0.18133	0.390775
HERVP71A_15q24.2	79.6186	112.741	89.0704	125.031	-0.255228	0.181455	0.390807
ERV316A3_19q13.31	17.7406	29.4504	16.134	28.8677	0.249887	0.181574	0.390807
HERVL_19q13.41a	5.74322	15.4967	5.31399	9.89993	0.173422	0.181627	0.390807
HERVS71_7p22.1	9.50979	15.5898	10.8835	21.415	0.213657	0.181817	0.390807
HERVH_19q13.32c	51.7856	140.633	29.92	85.8746	0.320093	0.181821	0.390807
ERVL_3q26.1a	6.06466	28.0153	14.3632	72.8925	0.216429	0.1819	0.390807
MER4_12q12a	60.1975	214.397	53.8768	107.491	-0.32926	0.182021	0.390807
HERVH_12q21.31	9.61354	25.6192	10.6568	23.3365	0.225596	0.182169	0.390807
MER4B_7q36.3	14.094	15.6884	18.9924	18.7051	-0.199638	0.182169	0.390807
HERVL18_6q22.31b	262.75	367.122	446.868	1696.15	0.296104	0.182351	0.391
ERVLE_1p31.1k	17.8152	52.3066	21.5276	45.7867	-0.263664	0.182484	0.391089
ERV316A3_8q21.13h	6.38959	20.0908	6.62979	26.1278	0.191091	0.182575	0.391089
HERV4_19p12	10.3078	13.7664	15.6369	19.9423	-0.193377	0.183519	0.392914
ERVL_Xq28b	38.3773	79.5653	39.0049	91.1317	0.342117	0.183631	0.392956
HUERSP3B_3q28a	79.7999	147.754	89.9947	161.779	-0.327874	0.183762	0.39302
ERV316A3_2q12.3d	105.789	254.207	113.279	202.674	-0.327549	0.183845	0.39302
ERVLE_19q12b	9.4908	19.6695	11.5857	32.7854	0.208553	0.184234	0.393654
MER4B_16p12.3a	7.48777	12.6384	14.4501	32.5379	-0.213436	0.184489	0.393954
PRIMA41_2q11.2	13.5427	21.576	18.7373	33.7597	-0.216641	0.184559	0.393954
[truncated: 2,268 more rows]

## Sheet: LUSC
HERV	Avg_advance	SD_advance	Avg_early	SD_early	logFC	P.Value	adj.P.Val
HUERSP3_2q24.2	28.396	50.9848	61.5114	88.4163	-1.14165	8.17469e-06	0.0352002
ERVLE_15q25.1f	51.4927	40.4398	102.506	103.414	-0.80158	6.38148e-05	0.137393
ERVLE_8q24.3h	701.212	718.311	480.973	394.813	0.608595	0.000215246	0.171224
MER4_16q23.1b	10.6141	69.639	0.837953	3.85252	0.503023	0.0002433	0.171224
HERVIP10FH_14q23.1	157.821	124.236	264.002	403.706	-0.647685	0.0002767	0.171224
HERVL_5p13.3b	32.9922	36.3551	56.7702	58.9817	-0.783466	0.000307019	0.171224
MER101_3q13.13	10.0037	13.0601	20.4934	21.0676	-0.692114	0.000314884	0.171224
ERVLE_8q22.2b	12.1048	15.8162	6.21911	11.1969	0.67552	0.000323501	0.171224
PABLA_9q33.3	10.8651	17.0138	4.76644	8.10635	0.607081	0.000357876	0.171224
MER4_1q21.2	48.7232	89.0059	56.1171	53.9989	-0.832476	0.000437331	0.180361
ERVLB4_8q24.3d	17763.1	11282.9	12257.2	7250.01	0.578517	0.000460745	0.180361
HERVIP10F_12p13.2	205.664	157.473	279.04	186.543	-0.572795	0.000627764	0.213361
HML2_11q22.1	200.228	816.264	9.40564	47.0291	0.990386	0.000698241	0.213361
ERVLB4_Xq26.3h	50.9928	208.973	8.17337	54.0323	0.801356	0.000766553	0.213361
ERV316A3_15q21.2a	64.305	81.2962	95.1964	132.505	-0.605273	0.000773026	0.213361
HERVH48_8q24.23	55.9796	352.186	0.471471	1.76744	0.608284	0.000814376	0.213361
HERVH_9q33.1c	13.9808	83.0707	0.250413	1.36851	0.496545	0.000921862	0.213361
ERV316A3_20p11.21	135.197	82.329	102.81	98.6251	0.490929	0.000940091	0.213361
HERVW_6q21b	20.7438	111.686	1.91437	8.01183	0.606735	0.00101794	0.213361
ERV316A3_2q21.3	15.3796	16.5532	29.1911	35.6925	-0.648133	0.00103384	0.213361
HARLEQUIN_Yq11.221c	74961.1	64152.5	53486.3	45676.1	0.480961	0.00104055	0.213361
HERVK11D_12q12	8.14454	19.154	3.204	10.5268	0.568956	0.0011468	0.224459
HERVL_3q26.1e	31.6378	33.3171	21.6794	30.307	0.73995	0.00142668	0.267099
ERVLE_5p13.3m	11.2264	26.7757	3.86966	11.6231	0.604728	0.00158414	0.284221
HERVL_12q14.2b	11.8172	24.5982	5.95648	14.3789	0.606881	0.00172398	0.296938
HERVH_9p24.2a	28.2945	76.7471	60.2478	203.547	-0.793567	0.00192544	0.303273
MER101_7q36.1a	13487.8	5911.67	10858.1	4852.72	0.314163	0.00208111	0.303273
HERVL74_16q24.3	633.094	421.85	808.381	542.983	-0.379218	0.00219005	0.303273
MER4B_11q22.3b	11.193	14.5347	20.0959	21.939	-0.592576	0.00221656	0.303273
HERVH_6q22.31a	23.6941	42.9446	14.5709	43.3476	0.738981	0.0022814	0.303273
HUERSP3B_1p33a	50.1145	87.203	92.4396	157.49	-0.975092	0.00233929	0.303273
HML2_11q23.3	54.2942	199.76	198.066	1267.67	-0.96396	0.00237435	0.303273
HML2_6q25.1	75.4512	66.5748	125.001	94.0797	-0.634013	0.00243153	0.303273
ERV316A3_8q13.3a	5439.86	3600.79	3918.2	2633.48	0.421895	0.00246363	0.303273
HML1_6q22.32	61.6892	72.5463	93.4558	99.1075	-0.641796	0.00255918	0.303273
HERVL18_6q25.2	238.74	1718.76	2.30242	13.0558	0.694971	0.0026221	0.303273
HERVL_4q31.21b	183.197	106.058	131.679	85.4155	0.431584	0.00274813	0.303273
HERVH_12q24.33a	20.5483	20.0737	14.1501	18.4475	0.603845	0.00283863	0.303273
ERVLE_Xp11.22a	28.3989	35.8624	46.3023	46.8939	-0.679753	0.00285882	0.303273
MER4B_4q13.3e	36.0241	35.791	56.5374	59.5648	-0.642759	0.00287154	0.303273
ERVLE_2p13.2a	140.204	104.902	190.783	127.094	-0.503115	0.00296989	0.303273
HML1_19p12a	10.2893	59.0678	0.48659	2.06915	0.43528	0.00299313	0.303273
HML3_7p12.3a	174.773	1508.75	2.93074	6.18962	0.638213	0.00303668	0.303273
HERV4_9q34.3a	9.24447	14.3832	6.41026	19.7758	0.578025	0.00309894	0.303273
HML2_3q12.3	1954.27	1899.82	2393.35	1490.5	-0.485246	0.00340375	0.310638
HARLEQUIN_7q32.1b	8.63964	11.5343	5.10837	10.3367	0.51124	0.0034054	0.310638
HERVL_2p11.2b	31.8918	32.3176	47.6393	53.3322	-0.594711	0.00342316	0.310638
MER61_13q14.2	61.163	75.365	78.2348	66.7639	-0.57209	0.00346276	0.310638
HERVL_4p15.2c	3.04487	10.714	10.6169	20.0292	-0.523918	0.00355623	0.311093
MER61_3p11.2	6.87525	10.3273	14.7959	21.0732	-0.519588	0.00388839	0.311093
ERVLB4_11p15.5c	191.643	192.489	261.757	258.574	-0.639646	0.00391274	0.311093
MER61_1q23.1c	693.333	1306.65	839.425	992.53	-0.718019	0.00394982	0.311093
ERVLE_8q21.3f	20.8756	38.0808	25.7342	22.491	-0.577429	0.00394997	0.311093
HERVH_14q32.31c	31.8683	33.4805	20.2701	27.1288	0.71471	0.00413388	0.311093
HERVH_10p12.1a	31.346	282.584	0.128958	1.18894	0.365524	0.0042058	0.311093
HERVIP10FH_3p26.1a	25.2525	140.297	1.47065	4.82311	0.506872	0.00420625	0.311093
ERVLB4_7q36.3a	73.5414	67.8689	51.6082	42.5632	0.546599	0.00422726	0.311093
ERV316A3_12q24.13	125.764	109.081	195.612	203.858	-0.560281	0.00424958	0.311093
HERVFC1_2p11.2	10.7942	64.4294	1.39696	3.49903	0.445598	0.00432127	0.311093
HERVE_12q24.32	12.7791	41.7652	4.16017	14.267	0.563795	0.00433478	0.311093
HML6_20p11.21	8.36565	10.229	5.23089	7.50744	0.448544	0.00464547	0.320362
ERVLE_15q25.1a	12.6228	13.9655	19.9409	16.8966	-0.504336	0.00466776	0.320362
HML3_4q13.3b	22.4033	59.9088	37.6857	100.707	-0.671541	0.00476766	0.320362
HML3_1p21.3	44.8435	39.9886	65.0446	51.2613	-0.534579	0.00479835	0.320362
MER4_Xp22.2d	53.2791	42.5015	92.1688	156.08	-0.561478	0.00483594	0.320362
HERVL40_16p11.1c	22.9969	188.374	0.0941451	0.867975	0.400527	0.00496868	0.324169
HUERSP1_20p12.3	18.8501	57.2786	4.43367	16.6415	0.571076	0.00516574	0.327675
MER4_15q22.31a	18.2174	19.6565	25.4656	20.8836	-0.524815	0.00518815	0.327675
HERVH_1p31.3b	87.4182	357.765	16.3697	115.109	0.760845	0.00526202	0.327675
ERVLB4_7q22.1b	9.64611	31.1605	4.78475	18.3991	0.503291	0.00545996	0.327675
HERVH_6q23.3	10.9346	27.9434	8.31793	36.5132	0.511352	0.0054661	0.327675
HERVIP10FH_Xq12	15.818	33.8278	5.6136	10.8826	0.567706	0.005479	0.327675
MER4_15q22.31b	34.2165	33.8769	49.7144	36.8495	-0.541128	0.00556485	0.328096
HML3_3q21.2	27.6379	29.2704	41.756	44.2533	-0.557518	0.00564886	0.328096
ERV316A3_11q23.3d	5.53146	10.8478	11.3658	15.2556	-0.494184	0.00571463	0.328096
MER4_Xq21.31c	3830.15	2466.95	2813.83	1749.93	0.384904	0.00589127	0.333787
ERV316A3_7q33a	13.0848	32.5717	5.12343	20.6022	0.555148	0.00637468	0.354859
HERV9_6q25.1	124.878	111.249	179.037	135.849	-0.593939	0.006428	0.354859
MER4_3q29e	12.6959	30.7944	7.09566	17.9722	0.51127	0.00663254	0.355166
ERVLE_5q22.1c	38.7711	37.6718	25.8783	35.709	0.622978	0.0067482	0.355166
ERVLE_4q31.1a	10.4611	16.6659	5.62753	10.1562	0.516857	0.00676231	0.355166
HERVH_7q36.1b	14.2083	20.417	21.8034	28.973	-0.52178	0.0067635	0.355166
ERVLE_19p13.2b	8.59169	33.9496	2.87831	11.842	0.460724	0.00701006	0.355688
HARLEQUIN_16p11.1	9.55521	16.9336	5.12518	9.42166	0.503441	0.00704941	0.355688
ERVLB4_Xp11.21c	31.4991	28.1347	49.8097	46.4319	-0.502832	0.00712289	0.355688
HERVL_2q32.1e	31.3357	27.7947	22.0599	21.6312	0.526979	0.00723247	0.355688
ERVLB4_5q12.3a	5.43885	8.80141	11.0861	13.8599	-0.453048	0.00726122	0.355688
HERVH_6q24.1c	9.44481	28.4223	4.62702	15.2352	0.480413	0.00728634	0.355688
ERVL_8q24.13	19.7729	19.1802	13.1401	15.6719	0.491531	0.00744666	0.355688
MER101_18q21.1a	135.035	111.845	168.091	102.049	-0.409237	0.00750759	0.355688
HML3_7p12.3b	35.4061	295.389	1.36452	5.24957	0.451215	0.00751687	0.355688
LTR25_2p13.3	95.8646	95.0756	130.288	102.741	-0.527649	0.00782302	0.36102
HERVL_6q22.31a	8.61235	16.5684	6.17921	26.4274	0.490226	0.00799691	0.36102
ERVLE_8q24.23d	32.0689	79.8428	10.9174	34.6768	0.714192	0.00803179	0.36102
HERVK11D_5p13.2	35.8069	102.614	160.005	740.169	-0.814921	0.00803187	0.36102
HML6_14q12a	17.3241	22.6086	9.83002	16.3747	0.58377	0.00804875	0.36102
HERVH_4q35.2b	7.0553	25.2853	4.10988	17.5069	0.43941	0.00835515	0.368571
HML1_2p13.3	5.13686	10.5951	11.506	16.6909	-0.472409	0.00839143	0.368571
HARLEQUIN_18p11.22b	66.7562	129.708	78.4873	83.6751	-0.722077	0.00847388	0.368571
HERVL74_19p13.2b	44.2397	63.1722	64.5001	69.3482	-0.681089	0.00858394	0.369625
HERV3_4q13.2b	268.537	958.002	352.824	1240.23	-1.09661	0.00898417	0.374925
HERVW_17q12a	13.4549	20.7293	21.0289	23.1297	-0.57893	0.00915649	0.374925
ERVL_1q44b	67.7606	46.9164	93.0543	57.1118	-0.435832	0.00918901	0.374925
HERVH_15q26.2a	28.8142	129.047	6.75918	29.6034	0.572862	0.0092773	0.374925
HERVH_Xp21.3b	226.903	977.628	9.13809	33.8904	0.7327	0.00928703	0.374925
HERVL74_17q12	888.995	836.115	1151.03	905.906	-0.52092	0.00935304	0.374925
HERVK11_12q21.31	36.2181	214.594	3.76859	22.4794	0.522505	0.00942556	0.374925
HERVIP10FH_11p15.5	2523.59	6282.06	6429.77	16442.9	-1.03006	0.0095947	0.374925
PRIMA4_Xp11.22	8.14534	28.3854	11.8019	16.4413	-0.493974	0.00965208	0.374925
HML5_2q14.3	14.8532	14.1904	24.1374	21.7017	-0.471264	0.00968142	0.374925
HERVIP10FH_14q11.2	83.8255	624.905	5.489	30.7832	0.530887	0.00984035	0.374925
ERV316A3_7p21.2b	10.5493	45.7329	1.01242	4.95126	0.42181	0.00985916	0.374925
ERV316A3_1q32.2a	120.35	232.327	190.363	323.462	-0.95701	0.0100338	0.374925
ERVLE_2p22.1b	26.8021	19.4196	39.3759	32.171	-0.43381	0.0100703	0.374925
HERVKC4_6q22.31	33.2418	40.1587	21.337	20.0969	0.530196	0.0101141	0.374925
ERVLE_4q13.3g	110.831	85.7956	163.071	164.805	-0.516993	0.0101397	0.374925
ERVLB4_6q24.1c	8.27714	11.701	5.52664	9.00153	0.434047	0.0102611	0.374925
HUERSP3_1q42.12	790.806	699.561	570.001	410.62	0.410972	0.0102743	0.374925
HML2_10p14	19.5745	37.6409	27.1197	32.9235	-0.586887	0.010376	0.375454
ERVL_21q21.1c	18.5549	95.1269	4.34088	17.7577	0.51268	0.0105616	0.378986
ERVLE_6q16.1a	8.06161	12.198	4.39851	6.17515	0.408409	0.0109358	0.384946
HERVH_14q21.3c	5.98619	40.2338	4.36958	38.5928	0.354529	0.0109658	0.384946
ERVLB4_8q21.11b	8.16537	10.531	5.36236	8.68561	0.417827	0.0109959	0.384946
HML6_12q24.12a	368.619	367.424	541.795	654.754	-0.534023	0.0112556	0.389477
HERVL40_14q24.3	43.8242	60.0568	30.3191	27.4126	0.479803	0.0114435	0.389477
HERVH_3p21.31d	13.4802	114.166	0.428575	1.62553	0.319623	0.0114957	0.389477
MER61_2q35	27.8529	42.1833	36.3625	35.5635	-0.586369	0.0115132	0.389477
HERVH_11q14.2	8.91347	16.7482	14.5351	17.2076	-0.491865	0.0115836	0.389477
HERVL32_19q13.33a	12.7561	40.0937	5.3653	26.3372	0.459089	0.0117567	0.389477
ERVLE_3q11.2h	18.5114	43.1955	6.7552	16.6571	0.575803	0.011814	0.389477
ERV316A3_7q31.1c	8440.21	4702.89	6512.15	3437.71	0.305395	0.0118489	0.389477
ERVLE_Xp11.4b	14.7078	48.4824	3.2744	5.87306	0.468577	0.0119641	0.390282
HERVFH21_1q23.1	63.1659	146.75	156.477	371.115	-0.932491	0.01218	0.393818
MER4_17q21.2d	27.4086	39.7622	87.019	275.559	-0.692106	0.0122554	0.393818
HML5_12q23.1	1001.91	892.043	1233.66	857.385	-0.427787	0.0124607	0.394725
ERV316A3_5q14.3c	38.3415	64.162	19.9583	34.9715	0.667092	0.0128248	0.394725
HERVP71A_5q14.3	80.5901	160.617	42.5448	87.4272	0.845907	0.0129663	0.394725
HERVL32_2p15a	12.1722	16.2861	8.23048	14.3119	0.478657	0.0131042	0.394725
ERVLE_3q13.33b	14.2195	129.636	0	0	0.314942	0.0131786	0.394725
HERVL_7q36.1b	20477.1	18044.6	14662.5	12529.7	0.380399	0.0133842	0.394725
ERVLE_1q32.1e	12.7349	20.0569	38.6497	98.11	-0.574862	0.0134665	0.394725
MER4B_20q13.12	29.8296	33.5324	36.381	27.8771	-0.485745	0.0135037	0.394725
HML3_6q13	6.3377	8.69909	5.04482	9.55984	0.393918	0.0136178	0.394725
HERVH_2p22.2c	318.952	2305.62	73.9833	117.086	-0.758206	0.0136503	0.394725
HERVFRD_22q12.3	8.53407	30.6099	3.23625	7.08818	0.397606	0.0136535	0.394725
MER41_20p12.3	27.4692	25.2735	18.7696	16.3873	0.431719	0.0139164	0.394725
ERV316A3_6q14.2	8.37328	11.76	5.76889	9.68727	0.428144	0.0140675	0.394725
LTR25_4q34.1a	52.1506	56.1459	36.3232	35.3746	0.470376	0.0141299	0.394725
MER4_Xq13.1	12.6189	18.5111	7.36821	10.2464	0.445172	0.0143573	0.394725
HERVH_12p12.3e	119.857	859.732	9.54708	24.7112	0.615204	0.0144946	0.394725
ERVLE_1q42.12a	244.839	262.158	164.391	158.631	0.475604	0.0145103	0.394725
HERVH_13q32.2	9.6213	54.333	1.92085	5.40033	0.38671	0.0145493	0.394725
HARLEQUIN_1p36.33	4200.48	3144.34	5048.09	3316.21	-0.46611	0.0147124	0.394725
HML2_19q13.12a	20.051	23.6654	12.769	15.2016	0.473311	0.0147352	0.394725
HERVP71A_12p13.31b	653.043	285.389	566.814	335.187	0.26742	0.0147883	0.394725
HERVH_4q28.1a	75.729	414.208	12.4351	79.6101	0.579215	0.0148514	0.394725
HERVH_4q22.1j	9.55046	66.5872	0.761191	3.60729	0.315679	0.0148996	0.394725
HERVH_16q22.1	36.6078	125.483	65.0266	203.978	-0.699356	0.0150697	0.394725
MER61_7p14.1	7.32693	17.5243	3.13979	6.37454	0.401424	0.0150896	0.394725
HERVH_6q22.1c	175.861	163.711	137.917	144.085	0.515844	0.0151382	0.394725
ERVLE_4q21.21c	7.76565	15.622	19.423	43.3247	-0.487073	0.0151408	0.394725
ERVLB4_22q13.32a	57.013	372.281	2.1284	9.70793	0.48143	0.0151438	0.394725
ERVLB4_6p23	13.1334	32.8644	24.0045	32.9174	-0.546679	0.0152379	0.394725
MER4_Yp11.2f	71.4684	103.604	43.483	61.3106	0.790855	0.0152867	0.394725
MER101_16p11.2b	30.9309	32.6774	41.9977	36.2018	-0.521435	0.0154469	0.394725
HERVH_12q14.1b	18.0148	110.283	2.39035	6.96636	0.437278	0.0154907	0.394725
MER101_22q12.3	7.91581	11.8168	13.9656	16.3041	-0.425715	0.0155248	0.394725
PABLA_4q22.1	61.2789	38.5857	44.9873	38.7342	0.420255	0.0157057	0.394725
HERVH_9p13.3b	227.051	217.194	338.363	406.382	-0.465868	0.0157146	0.394725
PRIMA41_4p16.3	15.9624	20.5906	10.5047	13.8925	0.477939	0.0158956	0.394725
PABLA_6q26a	29.2578	80.79	104.122	274.344	-0.776972	0.015995	0.394725
LTR57_14q22.1	11.3181	14.2696	17.5428	16.1351	-0.438094	0.016035	0.394725
MER41_Xq26.1	27.1924	78.0196	10.0166	45.6582	0.582378	0.0160729	0.394725
HML2_1q23.3	68.8512	99.7538	120.252	165.33	-0.722501	0.0162013	0.394725
MER4_9p13.3a	517.385	439.473	818.251	1066.18	-0.438117	0.0162715	0.394725
ERVLE_5q32	10.6485	16.5794	10.5163	49.7814	0.475481	0.0162883	0.394725
MER41_6p23	87.9965	88.2512	63.3211	60.8454	0.448094	0.0166207	0.394725
PABLB_8q21.11	12.6656	22.303	23.7841	33.896	-0.518758	0.0166737	0.394725
MER4_12q21.33	7.09397	13.9279	3.62295	7.83761	0.396475	0.0167518	0.394725
HML1_15q24.2	23.6871	24.4248	36.1748	48.7363	-0.455904	0.0168238	0.394725
HERVEA_1q31.1	65.2749	463.378	7.4746	24.2987	0.531748	0.016853	0.394725
HERVH_17p11.2	28.6597	49.868	56.631	88.5724	-0.668291	0.016873	0.394725
HML6_14q12b	66.5713	97.6876	35.339	50.9601	0.718702	0.0168823	0.394725
HARLEQUIN_4q13.2b	89.6182	313.009	115.495	399.176	-0.822368	0.016887	0.394725
HERV30_Yq11.221a	8.86845	60.5261	1.41358	7.63788	0.352925	0.0173263	0.394725
HML2_4p16.1b	53.4397	97.4266	102.146	255.468	-0.623715	0.0174236	0.394725
ERVLE_2p23.3a	16.8659	17.2869	24.1007	19.6693	-0.440711	0.0174492	0.394725
HERVEA_3q25.32	84.8554	163.314	128.719	203.337	-0.614833	0.0175938	0.394725
HUERSP1_11p15.4b	58.5505	65.8893	90.2723	86.222	-0.533742	0.0176898	0.394725
HERVL40_5p15.2	15.0778	29.8827	7.80188	18.4775	0.536142	0.0178039	0.394725
HERVH_15q24.1	111.603	925.461	105.008	483.737	-0.666585	0.0178523	0.394725
ERVLB4_5q11.2a	14.0522	25.7577	8.97722	14.5361	0.450178	0.0181739	0.394725
MER101_1p22.2a	47.2603	50.4121	51.7153	33.97	-0.459242	0.0182071	0.394725
ERV316A3_6p25.3b	9.40263	27.4122	22.3549	66.6072	-0.503846	0.018313	0.394725
HERVIP10FH_12p13.2	47.0781	36.7823	58.7962	40.8705	-0.395436	0.0184095	0.394725
ERV316A3_4q22.3a	8.79431	16.2229	5.63128	10.9896	0.413962	0.018509	0.394725
HERVL_12q21.2b	101.899	131.304	151.074	174.078	-0.536951	0.0185461	0.394725
HERVH_5q22.1	11.273	17.0925	21.3551	50.336	-0.486697	0.01867	0.394725
MER4_8q24.3b	359.462	312.083	469.674	328.91	-0.39502	0.0187376	0.394725
HML6_4q21.1	11.4867	28.0379	24.187	55.4176	-0.514172	0.0187529	0.394725
HERVH_3p22.3b	65.5489	76.1287	80.8964	67.3492	-0.519322	0.018806	0.394725
HML3_1q25.2	79.6319	130.798	125.094	199.933	-0.700164	0.0188577	0.394725
MER4B_2q31.1	4982.91	3363.6	3890.15	2822.73	0.319766	0.0188616	0.394725
MER101_10q23.33	6.20103	13.4274	10.5105	13.4322	-0.386897	0.0188949	0.394725
HUERSP2_3q13.2	17.7584	23.6897	28.5584	32.6717	-0.500689	0.0190669	0.394725
HERVFH21_7q11.21	13.8988	41.6032	4.29923	8.84935	0.462499	0.0190717	0.394725
HERVH_10q23.32	57.1134	95.2123	31.6113	76.3077	0.650496	0.0191037	0.394725
HERVS71_1p35.1	44.2109	70.8834	57.1872	68.4273	-0.507436	0.0192312	0.394725
HERVEA_19p13.2	42.0054	67.4161	60.3884	68.7119	-0.622745	0.0192578	0.394725
HERVH_19p13.2d	1289.86	1494.73	1513.52	1211.56	-0.418747	0.0194917	0.394725
HML3_8p11.22	119.131	732.47	7.74715	23.1861	0.599671	0.0195347	0.394725
HERV3_19p13.3	527.371	600.037	360.758	441.91	0.666782	0.0195525	0.394725
ERVLE_4q24i	317.356	201.886	255.183	153.526	0.283191	0.0196167	0.394725
HML3_19p12f	12.6577	32.8093	4.15184	7.81293	0.427314	0.0198407	0.394725
ERVLE_8q23.3f	13.8474	17.9871	8.95458	12.412	0.464174	0.0200075	0.394725
ERV316A3_5p15.32a	99.5374	123.031	228.227	756.613	-0.745302	0.0200503	0.394725
ERV316A3_3q13.33a	16.3027	144.415	0.491838	2.61125	0.315452	0.0202006	0.394725
MER4_5p12b	117.493	120.013	78.8511	91.2393	0.483855	0.0203144	0.394725
MER4_12q24.31	8.76976	16.801	6.25756	15.08	0.401778	0.0203174	0.394725
HERVFRD_16q23.1	3171.75	2459.82	2424.81	2048.34	0.353732	0.020418	0.394725
ERV316A3_9q34.3b	31.0753	53.7896	71.864	142.917	-0.68638	0.0204872	0.394725
HERVH_5q14.3a	3.67826	16.8083	8.03774	70.1114	0.326359	0.0205042	0.394725
ERVLE_1p36.32a	50.667	51.4547	73.7771	66.5188	-0.546455	0.0205196	0.394725
HML5_7p14.1	3.68524	11.9741	20.5711	123.015	-0.426116	0.0205338	0.394725
ERV316A3_6p21.33b	30.593	32.8827	48.6912	47.38	-0.504216	0.0206327	0.394864
HML1_10p15.1	5452.34	15224	1654.89	10167.3	1.43303	0.020808	0.396457
HARLEQUIN_11q14.1	11.0668	88.4216	1.58467	9.22596	0.328585	0.0211763	0.400789
ERV316A3_Xq26.3a	20.9896	34.428	13.4499	12.7447	0.423469	0.021262	0.400789
HERVH_16p11.1	159.838	1433.31	7.06654	50.1266	0.444993	0.0213146	0.400789
HARLEQUIN_19p12e	46.9739	362.933	9.68031	57.4479	0.456112	0.0216807	0.405901
MER4_20p11.21b	22.2064	18.327	17.358	18.4284	0.420142	0.02201	0.408738
HML2_3p12.3	16.8909	28.4678	32.8481	59.2572	-0.546085	0.0220221	0.408738
MER34B_1q23.3b	1122.78	1526.21	1317.28	1225.54	-0.646371	0.0222049	0.410362
ERV316A3_12q23.2a	3.45745	6.132	7.44481	11.4671	-0.33609	0.0225341	0.411378
HERVL74_7p14.1	51.587	42.3514	73.779	65.015	-0.437352	0.0225465	0.411378
ERV316A3_6p12.3b	12.1459	33.891	5.74359	14.2526	0.457681	0.0225465	0.411378
MER4_5p13.2a	16.674	48.0181	42.058	128.024	-0.562215	0.0228736	0.415585
HERVIP10F_19p13.2a	10.5514	12.7765	16.9805	17.5896	-0.432617	0.0231106	0.418127
HERVL_9p24.1a	22.4765	23.6591	39.2061	51.8168	-0.459655	0.0233151	0.420062
HERVE_2q24.1a	56.9225	88.985	100.436	132.313	-0.692434	0.0235577	0.422307
HARLEQUIN_17q12	384.568	432.886	501.683	452.07	-0.53978	0.0237025	0.422307
MER4_7p14.3a	939.248	565.2	1270.3	997.463	-0.345454	0.0238124	0.422307
HUERSP3B_19q13.31c	11.0811	58.3145	12.8621	25.619	-0.462401	0.023832	0.422307
HERVH_11q24.1b	48.2488	140.415	50.3572	85.4663	-0.702331	0.0241784	0.426689
ERVLE_22q11.23b	17.4183	19.2593	11.9491	13.517	0.427567	0.0246611	0.428844
HERVE_13q14.11a	1454.45	888.361	1670.07	766.625	-0.281763	0.0249467	0.428844
HERVH_4q22.1c	25.3963	108.705	5.86594	12.7551	0.473454	0.0251093	0.428844
LTR25_17p11.2	9.6607	12.5779	6.51756	9.88947	0.377938	0.025119	0.428844
MER101_2p16.1	4.39896	6.63128	10.1654	18.2172	-0.362548	0.0251216	0.428844
ERV316A3_4q31.23c	19.5307	32.1058	26.7885	32.4648	-0.521805	0.0251393	0.428844
HERVH_2q33.2	15.1438	23.6326	23.2722	30.6283	-0.497976	0.0252255	0.428844
HERVIP10F_22q13.2	42550.6	25573.2	36099.9	29427.4	0.29911	0.0252401	0.428844
HERVL_2q37.1	56.897	169.698	27.8712	25.2564	0.472146	0.0252773	0.428844
PABLB_20p12.3	36.2659	132.991	6.93834	27.4886	0.499852	0.0255374	0.428844
HERVH_5p14.1	29.8235	267.553	0.476364	1.91877	0.301162	0.0256206	0.428844
HERVK11D_Yq11.221	43.6224	163.238	11.0392	33.7298	0.581901	0.0256413	0.428844
ERVLB4_4q31.3a	8.66777	11.374	6.12224	8.81563	0.374574	0.0258972	0.428844
HERVW_1q32.1	88.1983	137.275	130.409	173.067	-0.787666	0.0259387	0.428844
HERVL_21q22.12b	52.0673	237.538	21.3245	52.3995	0.589808	0.026083	0.428844
HERVH_10q23.31c	655.161	3336.08	20.139	70.3027	0.729747	0.0261493	0.428844
HERVL_11q12.2	16.1418	22.1224	27.8806	31.2439	-0.495851	0.0262924	0.428844
MER101_2q33.1	70.3777	77.7221	46.9215	52.8238	0.521565	0.0264658	0.428844
ERVLE_8q24.22b	122.828	140.835	170.01	181.738	-0.434162	0.0264994	0.428844
MER61_5p13.2	26.4728	43.9155	47.0071	76.5291	-0.570637	0.0265395	0.428844
ERVLE_4q35.1b	6.49055	15.6875	4.70311	13.0743	0.378871	0.0265669	0.428844
HERV9_8q21.13	22.8693	205.45	0.400912	1.71077	0.307388	0.0268628	0.428844
HERVIP10FH_Xq24	411.708	1161.49	473.93	1072.05	-0.815628	0.0268946	0.428844
PRIMA41_7q32.2	14.4307	20.0098	9.83611	14.8996	0.423764	0.0269232	0.428844
ERVLE_2p23.1a	20.4712	33.4414	14.2649	23.3814	0.483438	0.0269337	0.428844
HERVH_4q22.1f	12.2612	32.3349	7.33102	23.279	0.445085	0.0270092	0.428844
ERV316A3_5q23.1b	22.8858	28.3273	30.6253	30.1567	-0.488509	0.0270348	0.428844
ERVLB4_3p12.2b	18.494	69.2351	6.99378	26.5023	0.495419	0.027089	0.428844
ERVLB4_3q13.31	12.4698	14.5817	20.1379	19.9643	-0.423308	0.0272245	0.429175
ERVLB4_18p11.32c	15.1329	28.6409	7.93081	19.2681	0.484042	0.0273761	0.429175
HERVEA_1p21.1a	44.6272	103.794	82.0634	139.511	-0.718289	0.0275013	0.429175
HERVH_13q14.2a	213.408	180.655	253.698	169.747	-0.38909	0.0275087	0.429175
HML2_22q11.21	611.72	4239.64	74.5355	205.231	0.89588	0.0278178	0.431835
HUERSP3B_2p15	6.62009	10.1131	4.14149	6.62445	0.338762	0.0278797	0.431835
HERVH_6q23.2a	80.1031	450.516	81.513	217.998	-0.688978	0.0280505	0.432923
HERVH_7q31.31b	9.5139	45.0938	2.8038	11.1899	0.337791	0.0286318	0.438072
HML2_4p16.1a	220.393	764.289	184.965	258.238	-0.632728	0.0287375	0.438072
ERV316A3_1p31.3f	22.5051	24.4797	29.1126	24.3419	-0.428566	0.0288814	0.438072
HERVEA_Yp11.2c	6.20582	16.907	4.59039	14.5936	0.389547	0.0288973	0.438072
MER4_Xq28c	7.47113	11.6976	5.28818	10.1985	0.367253	0.0290207	0.438072
HERVIP10F_2p12	97.6444	475.279	38.9365	110.328	0.627695	0.029077	0.438072
ERVLE_13q22.1b	15.6996	26.088	30.397	49.5822	-0.498906	0.0291733	0.438072
MER4B_Xq21.1e	7.33938	35.1817	3.95833	15.2241	0.360972	0.029198	0.438072
MER41_5q23.1b	5.9112	9.96021	4.50043	8.25507	0.333023	0.0294531	0.438105
HERVW_19p12d	8.87187	15.8566	14.37	20.9667	-0.427439	0.0295774	0.438105
ERVLE_1p35.1c	1179.08	1236.87	1411.09	1187.17	-0.371851	0.0297434	0.438105
HERVIP10FH_2q14.2	23.1035	34.6184	158.891	678.249	-0.6773	0.0298091	0.438105
HERVH_4q22.3b	6.01678	28.3011	4.22408	21.2515	0.34832	0.0298631	0.438105
PABLA_11q12.1b	566.811	292.923	468.728	231.419	0.256564	0.0298955	0.438105
HERVFH21_Xq11.2b	317.901	434.809	515.526	682.743	-0.704838	0.0300837	0.438105
ERVLE_13q31.2a	14.4097	39.7954	8.30048	38.2429	0.463445	0.0300972	0.438105
HML4_8q24.3	14256.4	7974.31	11453	5771.04	0.2523	0.0301565	0.438105
HUERSP3_2p25.2	37.2802	37.0212	59.7054	75.254	-0.483741	0.0302176	0.438105
ERVLB4_11p15.5d	41.263	70.7941	44.2946	37.7746	-0.4601	0.0305625	0.440301
HERVL_6q27g	101.514	782.973	11.4394	17.6276	0.512888	0.0307251	0.440301
ERV316A3_9q34.13	14.2938	15.4933	11.0574	12.6967	0.392143	0.0310016	0.440301
HERVH_1p22.1	32.1499	36.3471	37.1719	30.4039	-0.441313	0.0310192	0.440301
HML2_10q24.2	105.432	225.294	43.1746	80.2547	0.600486	0.0310522	0.440301
HERVL_9p23b	4.63671	9.45971	9.71402	13.873	-0.380817	0.0310774	0.440301
HERVL_8q21.13b	11.1741	23.0168	18.2862	28.5562	-0.455991	0.031219	0.440301
MER4_Xq21.31b	8.6774	17.4839	6.10406	15.4276	0.402711	0.0312269	0.440301
HERVH_3q26.1d	6.73051	13.766	9.67859	51.5059	0.392648	0.0314228	0.440301
HERVW_Xq22.3c	208.59	220.956	245.502	168.814	-0.372009	0.0316394	0.440301
ERVLB4_Xq21.33b	47.8058	86.9318	99.8847	205.877	-0.690527	0.0316858	0.440301
MER101_12q24.13b	40.8794	55.827	24.2911	33.2067	0.549156	0.0316895	0.440301
HARLEQUIN_2q11.2b	21.6411	95.3785	8.354	31.3229	0.460175	0.0316984	0.440301
MER101_22q13.1	9.30396	15.7457	19.1001	29.258	-0.476568	0.0321432	0.445044
HERVL40_5q11.2	10.7631	14.0273	15.0416	14.3495	-0.388534	0.0329489	0.452212
HERVW_4q21.22	84.8125	66.7308	105.898	75.0449	-0.406538	0.03304	0.452212
HERVL_1p31.1e	12.5428	12.9105	8.65614	9.81167	0.369904	0.0331046	0.452212
HERVH_8q23.3b	8.00372	33.5038	3.22669	15.5676	0.347817	0.0334122	0.452212
HERVE_4p16.1d	11.4161	103.26	0.194482	1.03486	0.267189	0.0335529	0.452212
HERVL_4q28.1a	4.16205	8.07085	9.35621	13.9581	-0.369199	0.0335646	0.452212
HML4_17q21.31	1371.94	1508.27	1035.18	1159.61	0.361629	0.0337805	0.452212
HERVW_15q21.2	11.1181	14.4894	19.8586	25.0412	-0.428001	0.0339583	0.452212
ERV316A3_6p21.2a	8.35211	13.05	13.7536	17.5461	-0.380085	0.0339605	0.452212
ERV316A3_Xq26.1	534.004	228.711	468.797	275.015	0.241658	0.034077	0.452212
MER4_Yp11.2e	24.4373	48.9369	16.4722	38.5026	0.569657	0.0341587	0.452212
ERV316A3_11q12.1a	7.08882	20.1437	29.2018	123.288	-0.452328	0.034204	0.452212
MER41_6q22.31b	7.45695	9.43791	14.4152	17.8809	-0.38825	0.0342349	0.452212
HERVE_Yp11.2c	8.60219	32.0025	4.19705	15.3456	0.394782	0.0342359	0.452212
ERVLE_6q22.32	169.879	104.266	262.889	580.066	-0.340646	0.0343324	0.452212
HERVH_19q12	4.51513	13.9609	10.6616	23.462	-0.394801	0.0343412	0.452212
ERVLE_14q21.3e	118.818	92.4929	90.7791	60.0048	0.359205	0.0345208	0.453055
HERVL40_4q31.3a	38.6511	38.1217	48.6746	43.158	-0.405209	0.0346627	0.453055
MER101_3p21.31	10.2102	11.9518	14.2448	12.3562	-0.356712	0.0347319	0.453055
HERVIP10FH_19p12a	12.5597	79.5369	1.74097	5.79497	0.319258	0.0348261	0.453055
HERVH_18q12.2c	7.61447	24.8955	14.7822	37.383	-0.423956	0.0351284	0.453886
ERV316A3_1q32.2c	28.6273	38.346	15.8422	21.1192	0.517454	0.0351774	0.453886
ERVLE_18q21.1b	83.3865	148.137	117.428	535.493	0.661687	0.0352392	0.453886
ERVLE_7q11.21	54.4387	36.6084	44.247	29.7057	0.35387	0.0353116	0.453886
HERVIP10FH_8q21.3	19.0034	27.118	13.1478	18.5534	0.459029	0.0356258	0.456562
HERVH_10p11.22	31.3028	120.281	10.0574	27.9813	0.470459	0.0358491	0.45806
HERVH_10q24.31a	3786.39	3111.87	2990.04	2436.33	0.268393	0.0360451	0.459202
ERVLE_1q41m	32.0777	49.6643	39.5554	41.934	-0.465907	0.0362079	0.459915
HUERSP1_3q26.2	1.92316	4.24303	12.3648	55.3547	-0.332856	0.0367663	0.461869
ERVLE_13q12.13b	58.6084	84.7212	69.4156	65.9222	-0.438189	0.0367843	0.461869
MER4B_14q21.1c	12.8508	48.755	5.11287	18.063	0.41864	0.036816	0.461869
MER41_15q22.31a	9.90957	38.6606	6.04954	23.1338	0.364977	0.0368626	0.461869
LTR25_18q23	17.5884	32.7282	21.5192	30.3629	-0.42011	0.0369614	0.461869
HERVS71_2q14.3b	8.53904	30.2204	3.71189	9.06055	0.360724	0.0370053	0.461869
MER4_6q22.1b	55.7332	49.9286	75.6408	63.6194	-0.39379	0.0374842	0.466494
ERVLE_13q32.1b	18.1054	28.535	10.8317	13.6811	0.393921	0.0376462	0.46716
HERVH_7q31.32a	26.7709	121.587	19.0199	102.924	0.480517	0.0382139	0.470969
HERVH_15q21.3a	52.1264	235.624	19.0436	111.661	0.522208	0.0382993	0.470969
ERVLB4_8p21.1c	12.4033	17.5064	9.01372	20.5586	0.414177	0.0383092	0.470969
ERVLB4_1p36.12b	10.4333	13.2453	15.0033	15.5391	-0.37776	0.0387309	0.470969
MER4_9p13.3b	198.535	158.591	270.427	249.806	-0.37027	0.0387331	0.470969
HERVIP10FH_21q22.12	229.461	687.099	90.326	477.438	0.68167	0.0387798	0.470969
ERVLB4_15q21.2	79.8395	60.2282	103.345	69.0142	-0.350775	0.0388136	0.470969
HERVL_6p25.2	278.499	201.528	306.293	181.303	-0.302158	0.0389366	0.470969
HERVH_6q23.2c	89.4046	134.642	128.382	171.709	-0.709044	0.0390137	0.470969
HERVH_Xq22.2a	20.259	40.0205	30.6511	39.7947	-0.512411	0.0390926	0.470969
ERV316A3_4q31.1b	12.8049	23.5482	14.8895	13.5029	-0.398713	0.0391562	0.470969
HERVH_18q22.3a	749.913	2264.86	396.827	1356.38	1.01073	0.0394923	0.473449
LTR25_14q24.3	27.9892	42.7619	20.7441	31.0546	0.437755	0.0396003	0.473449
PABLA_12q13.13	11.9393	38.7701	4.82856	17.8328	0.388031	0.0397454	0.473449
ERV316A3_10q23.31b	14.3752	18.2854	9.7305	12.013	0.401222	0.0398023	0.473449
ERV316A3_21q21.1f	58.2924	150.288	20.4647	48.0739	0.611962	0.0399213	0.473557
ERVLE_11q13.3a	22.6598	182.903	1.86204	4.40479	0.323586	0.0400856	0.474199
MER61_1q24.3a	51.0286	89.2061	54.498	73.0823	-0.528829	0.0403084	0.475294
MER41_Xp11.21i	10.0731	13.1504	18.676	25.2778	-0.39908	0.0403989	0.475294
MER101_1p35.2	4.6198	9.88333	11.8364	29.7758	-0.379083	0.0405894	0.476107
HARLEQUIN_5q14.2	2404.54	2129.36	2699.1	1981.49	-0.383839	0.0407413	0.476107
HML6_Xp11.21	57.7942	65.7762	69.9357	54.4708	-0.374112	0.0408183	0.476107
ERVLE_1q21.2b	27.322	41.6683	43.5038	62.854	-0.524138	0.0409102	0.476107
MER41_5q15a	23.1967	25.1569	18.9595	20.2587	0.371674	0.0412747	0.477196
HERVH_14q23.1a	23.6812	28.8253	38.4266	42.764	-0.48125	0.0414329	0.477196
HERVH_8q13.2	42.2505	113.656	16.2495	59.3006	0.563565	0.0415655	0.477196
MER4_Yq11.221b	648.023	928.006	454.61	672.427	1.05303	0.0415875	0.477196
HERV3_Yp11.2a	161.074	206.588	123.09	186.893	0.834484	0.0416606	0.477196
HERVH_Xp22.31	66.2726	206.296	39.2587	166.591	0.636508	0.0416688	0.477196
ERVLE_6p22.1a	266.993	387.852	271.884	796.903	0.604433	0.0418408	0.477895
HERVE_19q13.41	92.2126	78.5678	72.106	49.8363	0.356464	0.042146	0.480107
HERVH_4q31.1a	11.6814	15.2043	21.5861	32.8629	-0.436758	0.0422785	0.480347
HERVL_4q13.2b	33.7664	34.7018	50.3725	50.5941	-0.493826	0.0424345	0.480385
HERVL_18q21.2a	48.6525	55.1141	57.0666	40.4006	-0.33854	0.0425921	0.480385
HML3_6p22.1	172.916	237.79	269.179	372.837	-0.593933	0.0426249	0.480385
MER34B_19q13.2	259.756	272.949	183.296	135.56	0.329307	0.0428052	0.480385
ERV316A3_5p13.1a	6.2457	20.9735	8.76877	11.9769	-0.345152	0.0428397	0.480385
MER61_4q31.21c	9.86267	28.8508	3.95269	7.64879	0.34508	0.0431084	0.481251
LTR19_19q13.2	10.8089	22.58	6.46552	10.9789	0.39169	0.0432216	0.481251
HERVL40_18q11.2c	16.3092	43.8075	26.9623	68.3574	-0.501373	0.0432522	0.481251
HML3_19p13.2a	87.4705	133.115	50.1123	60.4253	0.562903	0.0436662	0.482359
HML3_1p32.3	120.135	137.122	162.996	225.8	-0.486731	0.0437034	0.482359
MER41_1p31.1	10.3839	15.163	7.6367	13.2514	0.380519	0.04382	0.482359
HML6_Xp11.22	566.193	507.674	674.423	475.993	-0.442495	0.0440136	0.482359
MER4_6p22.3d	19.0377	27.5804	28.7952	36.0707	-0.446209	0.0440225	0.482359
HERVH48_7q22.1	533.441	1925.8	163.428	754.877	0.779142	0.0441334	0.482359
HERVK14C_Yp11.2a	101.7	208.079	71.2352	288.095	0.754579	0.0442984	0.482359
HERVH_10p12.33	5.47579	23.6724	5.61358	31.8019	0.324219	0.0444355	0.482359
MER101_12p13.31b	3379.95	3013.9	2443.38	2147.47	0.333002	0.0444673	0.482359
MER4B_5q14.1	119.404	87.4359	99.5932	73.3261	0.331418	0.044472	0.482359
LTR25_Yp11.2b	7.33861	12.5242	5.21027	12.1402	0.36672	0.0447436	0.484085
HERVL18_9p24.1	83.1072	108.774	100.511	82.6957	-0.435804	0.0448616	0.484145
PABLA_11q13.4	24.5852	69.4191	12.8685	43.2001	0.471832	0.0451107	0.485617
ERVLE_2q34a	8.0059	10.8842	5.92463	7.68324	0.318111	0.0452869	0.485696
HERVH_10q23.31b	3.01209	6.26094	7.79579	12.8202	-0.316585	0.0453437	0.485696
HERVIP10F_11q13.3	10.5342	54.9915	2.13432	7.2663	0.324142	0.0454971	0.486126
ERVL_6p24.2	9.17288	18.5648	6.42451	17.6293	0.371396	0.0457394	0.486126
ERVLE_11p12b	7.30516	19.4198	4.30298	13.3975	0.358429	0.0458241	0.486126
HERVIP10F_3p25.3	84.2125	327.455	148.282	549.607	-0.604293	0.0458354	0.486126
HUERSP2_19q13.2	317.318	274.307	429.721	432.064	-0.398058	0.0462129	0.487841
LTR25_5q15b	10.9623	13.9417	7.73555	9.16195	0.354186	0.0462237	0.487841
HERVH_12p12.3b	11.7046	71.3848	3.22918	8.99345	0.336782	0.0464665	0.488117
HERVIP10F_14q32.31	13.7315	95.6772	0.838339	2.89678	0.272034	0.0464765	0.488117
HERV30_5q11.2	25.3743	146.894	11.9398	101.897	0.38729	0.0466795	0.489056
ERVLB4_6q21c	6.93106	9.6936	4.98097	7.5249	0.314194	0.046964	0.490814
MER4_14q22.3b	13.3835	27.209	8.23372	13.552	0.389561	0.0470753	0.490814
HERVL_4q28.3b	6.31873	18.6932	3.86722	12.45	0.332033	0.0473658	0.492346
ERV316A3_13q31.1e	7.59521	33.0899	8.06216	59.4623	0.336983	0.0474509	0.492346
HERVS71_11q13.2	37.3126	102.032	42.341	53.0424	-0.518178	0.0476658	0.493387
ERVLE_2q37.3b	4.33008	7.48795	8.07957	12.4399	-0.310191	0.0478414	0.49357
ERV316A3_2q37.3c	40.6249	33.1434	56.4996	48.3677	-0.373644	0.0479127	0.49357
MER61_3q26.1a	22.9395	208.833	0.847735	7.35461	0.25669	0.0482514	0.495197
HUERSP1_5q14.1	39.5221	47.4612	30.0075	46.5885	0.485856	0.048479	0.495197
HERVL_2q11.1	12.6674	23.06	14.9087	66.2791	0.432794	0.0485858	0.495197
HERVEA_1p21.1b	10.0172	60.324	4.02624	34.5873	0.314049	0.0486538	0.495197
HERVL32_7q22.1	86.9658	60.6426	109.696	64.7087	-0.351726	0.0488306	0.495197
ERVLB4_11p15.5e	258.722	1233.76	491.533	1773.09	-0.695901	0.0489839	0.495197
MER61_4q21.1b	5.25928	8.78491	20.4558	81.2239	-0.360879	0.0492168	0.495197
HERVH_1q32.1a	81.8615	109.895	110.1	130.021	-0.640353	0.0493195	0.495197
HUERSP3_10q23.33c	16.492	28.8867	22.274	29.2079	-0.407146	0.0494231	0.495197
ERVLE_3q27.1b	12.4378	16.8363	20.7763	26.2226	-0.390147	0.0496914	0.495197
HERVH_2p13.3a	229.022	156.282	305.389	209.71	-0.315002	0.0500323	0.495197
HUERSP3_2q32.1	17.765	19.9463	22.9722	19.0177	-0.373566	0.0502103	0.495197
HERVH_22q13.1b	15.7102	21.9482	27.5588	61.1502	-0.422768	0.0502295	0.495197
HERVL_13q21.1a	5.33592	19.6711	4.84623	20.9729	0.334491	0.0503496	0.495197
ERVLB4_8q23.3c	10.8136	24.2591	7.55899	15.4782	0.367117	0.0504304	0.495197
HERVH_9q22.31b	7.80288	20.8142	4.5245	11.3873	0.345389	0.0505607	0.495197
HML6_11p15.4	332.338	888.557	339.173	398.421	-0.614964	0.0505916	0.495197
HERVS71_19q13.12a	9888.62	10338	6957.14	7450.96	0.605738	0.0506182	0.495197
LTR25_2q12.1	77.4911	73.1848	57.2106	60.4238	0.445802	0.0506843	0.495197
MER41_1q41a	128.418	96.6717	148.239	86.8593	-0.317159	0.0507615	0.495197
ERV316A3_3q28c	6.28509	20.0088	4.49556	17.5044	0.32767	0.0508497	0.495197
MER61_4q31.21a	21.3093	33.9537	27.1154	31.3386	-0.450551	0.0508908	0.495197
HERVFH21_19q11	18.9575	161.904	1.32121	3.68073	0.274275	0.0509314	0.495197
HARLEQUIN_13q22.3	13.0486	99.1312	2.25211	11.7564	0.287787	0.0509642	0.495197
HERVH_1q41g	74.8249	312.2	35.6918	65.5195	-0.570232	0.0511291	0.495197
HERVH_4q13.2	141.348	213.695	223.554	256.431	-0.568813	0.0512866	0.495197
HARLEQUIN_2q32.1	90.9959	128.593	107.787	92.0772	-0.504666	0.0513127	0.495197
ERVLE_3q26.32a	14.3994	69.3147	1.95724	9.33513	0.333397	0.0514938	0.495197
ERVLE_12q13.2b	13.1966	119.634	0.344331	2.10103	0.242658	0.0515696	0.495197
ERVLE_11q24.3d	13.4507	33.9198	7.31918	19.6485	0.398138	0.0516201	0.495197
ERVLB4_13q12.12a	87.0025	319.516	127.367	312.925	-0.618171	0.0516357	0.495197
HERVL_6q14.2	15.3482	17.7839	11.918	15.5719	0.390172	0.0522784	0.498691
MER101_19p13.2	25.1994	33.1831	16.3382	20.7373	0.423167	0.0523572	0.498691
HERVL_15q11.2	263.21	1115.69	41.3646	162.45	0.686076	0.0524713	0.498691
HERVH_4p15.2a	6.67358	22.1786	4.00625	13.4679	0.324419	0.0525669	0.498691
HERVL_Yp11.2f	7.77522	17.0946	6.46472	18.9808	0.369012	0.0526885	0.498691
ERV316A3_1p32.3a	37.8587	28.4623	30.4044	27.3658	0.372726	0.0530035	0.498691
MER61_4q26a	39.8057	170.688	10.5525	47.8623	0.466883	0.0530472	0.498691
LTR46_Xq11.1	9042.01	5080.3	7027.08	3433.22	0.300746	0.0532707	0.498691
HML3_4q31.3	151.799	165.051	185.769	185.443	-0.488507	0.0535	0.498691
MER61_3p21.31	8.61791	14.141	6.83704	12.3698	0.330306	0.0537372	0.498691
HERVH_5p15.33	403.25	639.292	644.824	925.554	-0.622141	0.0538252	0.498691
HML3_1q32.1b	1745.77	2254.38	1534.92	1443.9	-0.99671	0.0539127	0.498691
HERVH_12q21.2b	34.3902	44.5475	96.4221	260.252	-0.549089	0.054237	0.498691
HERVL_6q22.31i	9.99443	86.5589	0.661337	2.83079	0.258543	0.0542823	0.498691
HERVL18_4p15.2a	37.1413	84.5817	14.4993	29.3214	0.529215	0.0545153	0.498691
ERV316A3_16q21j	6.71145	10.4932	6.01832	11.5463	0.336074	0.0545535	0.498691
ERVLB4_1q42.13b	29.8614	26.6896	36.5909	25.3347	-0.346672	0.0546015	0.498691
HERVH_11q23.3b	33.9169	106.918	46.8019	109.819	-0.550102	0.0546239	0.498691
ERV316A3_9q31.3	24.3443	36.0963	21.5448	44.0635	0.50349	0.0546764	0.498691
HERVL40_7q21.11	9.20842	26.4613	6.97573	31.4191	0.358677	0.0546836	0.498691
HERVK11_Xp11.21	14.1436	15.7751	20.3989	19.2651	-0.361296	0.0547013	0.498691
HERVH_11p15.2	155.733	279.226	103.618	96.8712	0.337735	0.0549006	0.498691
ERVLE_22q13.2e	24.1033	22.8011	16.9333	14.6824	0.36733	0.0549154	0.498691
HERVH_9q22.31a	507.609	442.573	572.666	399.729	-0.367297	0.0549269	0.498691
HERVS71_11q13.4	9.19549	16.1736	8.88598	24.5193	0.364344	0.0550175	0.498691
ERVLE_15q13.3a	9.64289	14.3564	17.6037	26.8852	-0.398512	0.0551459	0.498691
HERVH_7q31.31a	147.572	1343.01	1.56917	10.4816	0.336576	0.0552353	0.498691
HERVH_7p15.2	5.84283	32.7387	236.365	1331.56	-0.507619	0.0552428	0.498691
ERVLB4_3q22.1a	50.6281	49.1306	65.2235	62.5891	-0.36335	0.0554802	0.499522
HERVW_3q25.1a	41.6871	126.005	105.637	293.439	-0.61	0.0557226	0.499522
HERVK14C_Yq11.223b	14.4938	58.7828	3.95241	12.6119	0.376129	0.0557371	0.499522
HERVL66_19p12g	5.91283	35.4093	4.40515	27.384	0.290795	0.0557989	0.499522
HERV4_3p12.3	7.45834	35.4334	3.35375	16.6782	0.329259	0.0559202	0.499569
ERVLB4_13q14.2b	11.5892	14.7191	16.2527	16.7675	-0.343692	0.0560457	0.499654
ERVLB4_14q21.3d	35.8451	32.7881	28.3202	41.7012	0.396653	0.0566694	0.503509
HERVL_15q11.1	23.2504	91.2287	6.03302	12.1973	0.406798	0.0567866	0.503509
HERV3_4q13.3b	27.2772	100.633	47.5852	134.55	-0.525001	0.0569682	0.503509
ERV316A3_7p21.2a	8.95807	41.0063	1.88525	7.94756	0.314255	0.0570502	0.503509
HML2_12q14.1	11.7659	79.5837	1.57714	6.40427	0.31073	0.0570628	0.503509
HERVH_7q11.21	5469.59	5738.04	3989.19	2645.27	0.303628	0.0572014	0.5037
HUERSP3_12q12a	8.63937	13.9766	5.66103	10.9567	0.339955	0.0574715	0.505046
PRIMA4_7q11.21b	61.8083	61.2108	92.6451	96.7432	-0.408359	0.0577088	0.505667
HERVL_4p12c	10.7752	88.8361	1.18596	5.08067	0.268897	0.0577812	0.505667
HERVH_3q23a	15.0102	39.4764	48.3043	163.935	-0.477587	0.0579636	0.505667
HERVK11D_2q31.1	21.5333	94.3994	117.077	709.119	-0.509466	0.0580119	0.505667
HERVH_2q32.3a	26.9526	162.731	9.11556	31.4205	0.404843	0.0582655	0.506466
HERVH_7q31.2	18.8349	32.2195	10.8744	19.2711	0.41164	0.05842	0.506466
HERVL_Xq21.33d	7.4748	18.0107	12.5724	23.7379	-0.365845	0.0584628	0.506466
ERVLB4_13q14.11a	4.67271	7.20866	7.69804	8.97804	-0.299261	0.0585741	0.506466
MER101_6q22.32a	15.2313	21.629	18.6804	19.3397	-0.362507	0.0592136	0.510813
MER101_6q25.3b	11.4776	27.6281	6.36872	11.4345	0.363686	0.0593141	0.510813
ERVL_1q44a	50.3879	37.5429	64.1747	50.7709	-0.329628	0.0595221	0.511039
HERVIP10F_19q13.31	4.30491	16.9055	8.241	20.1805	-0.31227	0.0595777	0.511039
HERVIP10F_8p11.22	24.6692	132.452	5.74802	19.5611	0.400037	0.0600046	0.512155
ERVLB4_14q13.3	6.00242	8.50336	5.17904	10.1567	0.288171	0.0600325	0.512155
ERVLE_13q33.3d	18.5107	45.3275	8.61745	16.0918	0.390161	0.0600647	0.512155
MER61_3p14.2	22.5091	57.239	9.21037	14.8188	0.405491	0.0604517	0.513692
HARLEQUIN_Xp22.2	203.854	569.868	394.371	1123.69	-0.617188	0.0604835	0.513692
ERVLE_2p16.1b	10.13	28.8412	7.268	21.047	0.375707	0.0609441	0.514702
HML1_1q42.12	229.716	931.541	46.4035	75.4785	0.48398	0.0610186	0.514702
ERV316A3_17p11.2b	9.18883	13.0158	7.89827	15.6986	0.326895	0.0610928	0.514702
ERVLB4_4q23b	121.466	58.3627	147.95	93.1349	-0.231943	0.0611983	0.514702
ERVLE_7p22.2a	7.63749	10.408	5.2606	8.00409	0.297858	0.0613074	0.514702
HERV9_7p14.2	24.4962	54.5061	38.4667	98.274	-0.426147	0.0614899	0.514702
HERVL_5p13.2b	6.52026	14.8976	3.95594	9.97248	0.333766	0.061552	0.514702
HERVH_Xp22.2c	51.416	194.748	56.6454	468.517	0.481546	0.061698	0.514702
MER4_1p12b	126.791	363.732	173.133	476.311	-0.697939	0.0619381	0.514702
HERVIP10F_19p13.2b	491.065	2182.45	543.326	1398.22	-0.590691	0.0621263	0.514702
ERV316A3_8q23.1c	7.63108	22.2759	15.9626	41.6954	-0.359289	0.0621412	0.514702
MER41_15q24.1	13.3589	71.9156	30.668	136.872	-0.420722	0.0621435	0.514702
ERVLB4_9q22.2b	47.1286	87.3027	54.6905	66.0609	-0.390479	0.0623761	0.514702
ERVLB4_12q12a	9.53243	22.9294	5.44459	11.0291	0.340158	0.0624267	0.514702
HERVH_12q13.2b	167.528	548.948	207.145	632.149	-0.500806	0.0625488	0.514702
HERVH_12q21.1a	6.59327	23.8866	4.36565	19.7006	0.318275	0.0627551	0.514702
ERV316A3_6p22.1n	662.55	946.167	785.328	835.792	-0.441407	0.0627989	0.514702
HML4_9q22.2	17.064	31.0505	20.6591	17.6857	-0.352735	0.0629597	0.514702
MER101_6q22.32b	16.8889	24.8929	23.2779	30.1413	-0.379707	0.0630002	0.514702
ERVLB4_10q11.22a	52.2498	126.526	67.2667	110.289	-0.659751	0.0632088	0.514702
HERVL40_14q13.1b	6.84226	12.481	11.4453	14.1307	-0.339129	0.0632334	0.514702
HERVH48_1q44c	66.6338	94.4018	76.9299	68.6876	-0.425523	0.0632915	0.514702
HERVH_1p31.1a	940.188	629.617	729.04	487.857	0.280686	0.0634139	0.514702
PRIMA41_12p11.21	96.653	215.208	59.9509	179.46	0.6292	0.0634712	0.514702
MER4_3q29c	257.233	333.363	370.546	653.439	-0.521342	0.0636963	0.515557
MER34B_10q25.3b	21.4417	23.0181	16.5702	22.5114	0.386821	0.063909	0.516308
MER4_14q32.12b	11.5497	19.7383	15.2766	18.8853	-0.373508	0.0644128	0.517981
HERVL18_7p21.3	16.9313	73.9816	13.0063	63.2894	0.397399	0.0644709	0.517981
HERV4_15q21.3	18.2105	21.5481	25.6212	25.8404	-0.365194	0.064585	0.517981
ERVLE_1p35.3c	4.67302	8.59281	9.67737	14.2116	-0.320744	0.0645972	0.517981
HERVL74_6p25.1	1315.99	831.605	1069.79	593.461	0.250688	0.0651717	0.519628
MER41_1p34.1a	8.49362	14.595	5.61782	8.48936	0.305581	0.0654558	0.519628
PABLA_8p21.3b	6.32064	8.0219	5.36028	8.58079	0.299313	0.0654901	0.519628
HERVH_5q34f	103.596	938.626	1.16571	4.1634	0.266747	0.0655021	0.519628
MER4B_7p12.2	16.728	85.5016	8.98935	61.8093	0.36159	0.0655341	0.519628
HML4_10p15.1	3491.1	22410.6	811.093	4492.03	0.904792	0.0659	0.519628
HERVIP10FH_16p11.1b	26.136	28.7152	20.0758	22.0256	0.384571	0.0659003	0.519628
HERVH_1p31.1l	21.6092	47.1677	14.4135	29.3639	0.43929	0.0659341	0.519628
HERVEA_12p13.31	206.328	229.798	247.569	254.567	-0.445447	0.065962	0.519628
HARLEQUIN_4q32.1	66.6617	153.124	39.9585	63.659	0.444698	0.0660094	0.519628
HML4_16p13.3	2395.66	1442.36	2708.09	1332.11	-0.228644	0.0661387	0.519696
HERVH_Yp11.2b	16.5564	119.35	1.94411	9.53737	0.287373	0.0664613	0.521279
ERVLE_21q22.2	13.1586	28.7506	8.01642	14.9259	0.377941	0.0666571	0.521865
HERVH_7q11.23a	94.4666	76.4286	133.02	114.236	-0.381548	0.0668878	0.522721
HERVL66_19q11	147.283	1344	0.857443	3.24023	0.290692	0.067288	0.523727
HML3_5p15.33a	154.816	138.179	194.608	156.279	-0.330477	0.0673217	0.523727
ERVLB4_8p11.23b	434.17	386.633	492.646	380.423	-0.290273	0.0676274	0.523727
ERV316A3_4q21.1m	7.11486	10.9885	27.4827	106.585	-0.366663	0.0676391	0.523727
ERVLB4_7q21.3b	21.5967	26.5055	30.5769	31.4485	-0.418631	0.0677006	0.523727
HERVL_3q26.1h	8.11723	20.4513	4.65509	10.6962	0.335144	0.0677463	0.523727
MER4_4q22.1	6.70232	13.0526	5.21316	12.6979	0.32501	0.0679145	0.524085
ERVLB4_7p12.1f	8.24309	13.1322	6.02471	10.8362	0.344113	0.0682072	0.525403
HERVIP10F_14q11.2c	22.7144	32.5872	117.116	764.963	-0.46398	0.0687104	0.527806
ERV316A3_13q14.2b	37.448	150.435	32.025	264.736	0.439988	0.0687643	0.527806
HERVL_12q21.2c	44.9981	53.3784	63.3666	73.7912	-0.409158	0.0689125	0.528002
HERVW_1q42.13	7.19513	9.38632	5.97249	8.9117	0.295937	0.0691718	0.528501
HERVH_12q13.11a	5.51296	8.82135	5.28823	15.0292	0.302602	0.0693414	0.528501
HML2_9q34.11	94.0169	74.1099	76.1086	90.3851	0.388166	0.0693458	0.528501
MER4_3q29b	529.873	658.182	702.563	1061.49	-0.436966	0.069672	0.52895
HERVL_6q14.1f	28.8768	32.8642	22.7599	23.4288	0.366292	0.0696956	0.52895
HML6_17q25.1	3.57375	13.6369	6.52351	46.688	0.289751	0.0699965	0.52895
HERV9_5q11.2	100.636	73.8571	134.812	126.26	-0.317777	0.0700744	0.52895
HERVIP10FH_19q13.41	10.4207	20.3934	6.72923	17.7837	0.347386	0.0703289	0.52895
HERV9_1q25.1	25.4771	28.9307	35.7486	44.4526	-0.382651	0.0704658	0.52895
MER4B_7q33a	51.264	89.1507	28.8909	37.8364	0.504905	0.0705077	0.52895
HERVH_6p23	19.1336	62.91	26.1446	52.2717	-0.438645	0.0705943	0.52895
HERVH_7p21.1a	149.35	259.861	218.241	295.231	-0.612493	0.0706664	0.52895
HERVE_Xp11.23	645.036	1300.6	652.166	538.951	-0.303806	0.0707399	0.52895
ERVLB4_12p13.2a	7.64653	14.5048	12.4794	21.8172	-0.339173	0.0708051	0.52895
PRIMA41_4q13.3	6860.24	4640.63	5658.57	4412.01	0.242187	0.0709274	0.52895
ERVLE_5q14.3c	5.60929	8.35564	5.00445	9.53823	0.288176	0.071106	0.52895
HERVL_18q12.2b	7.75434	37.985	2.87083	11.3083	0.308464	0.0712365	0.52895
HERVL_7p21.3a	1391.6	806.512	1132.82	594.964	0.280965	0.0712474	0.52895
HERVK11_6q25.3	92.8719	118.471	132.657	185.347	-0.48232	0.0715236	0.529326
HERVH_13q13.3b	73.3476	75.6024	107.628	146.079	-0.472525	0.0715439	0.529326
HERVW_6q12	11.8022	36.9636	5.00218	15.6159	0.359751	0.0719397	0.531342
HERVH_1p32.3e	71.0496	362.992	12.9513	56.1565	0.459489	0.0723756	0.533646
HERVH_1p13.2b	150.294	897.79	39.4825	99.7614	0.502629	0.0728103	0.535293
HERVH_2p13.3d	7.47116	21.9339	4.60112	11.2202	0.303347	0.0728476	0.535293
HERVH_2q23.3a	48.5001	410.269	4.63691	16.3395	0.309854	0.0729953	0.535465
HERVH_3q28c	21.7916	169.849	7.4336	40.3964	0.3254	0.0732387	0.536336
ERVLE_11p11.2c	26.8263	26.4188	32.0892	23.2164	-0.330652	0.0739293	0.539644
MER101_1p31.3	19.6314	30.933	23.4931	23.4303	-0.379679	0.0739508	0.539644
ERVLE_3q13.2b	12.2193	13.9321	10.161	14.327	0.329949	0.0740663	0.539644
ERV316A3_6q25.1g	8.9906	13.4596	7.26598	12.469	0.340687	0.0744362	0.541423
HERVH_2q24.3c	51.212	226.459	12.7487	40.6843	0.46549	0.0749061	0.543871
HERVH_8q21.2b	28.7978	125.466	7.77604	30.9598	0.379422	0.0750254	0.543871
HERVH_19q13.2a	97.1503	105.355	159.111	282.359	-0.442702	0.0754086	0.544896
HERVE_9q34.3	112.623	123.292	177.791	214.441	-0.441972	0.0754199	0.544896
HERVL_5p14.3d	64.8841	178.286	26.5616	83.504	0.575011	0.0756933	0.544918
HERVIP10FH_1q23.1	103.151	74.3429	124.268	94.1792	-0.320859	0.0756959	0.544918
ERV316A3_5q14.1	91.3886	72.967	72.3368	52.1737	0.278196	0.0758026	0.544918
HERVW_11p12	9.06665	69.897	2.01422	15.6812	0.268942	0.0760545	0.545818
MER41_19p12b	7.64446	9.83266	14.3974	22.1871	-0.321517	0.0762285	0.546156
HERVIP10F_21q11.2a	9.68074	79.6754	1.48223	7.50973	0.245124	0.0766607	0.546707
HERVL74_19q13.11a	10.2063	14.2205	6.97357	7.93169	0.300282	0.0767662	0.546707
ERVLB4_Xq22.1f	10.8424	11.67	9.48091	12.6872	0.303508	0.076798	0.546707
MER4_1p11.2	6.11315	11.2642	4.43898	8.65502	0.293346	0.0771124	0.546707
HERVIP10FH_2q14.3a	8.10718	15.1544	4.97972	7.13537	0.289966	0.0772235	0.546707
ERV316A3_5q35.2b	213.631	924.923	101.194	403.972	0.539824	0.0772693	0.546707
ERVLB4_12p12.1b	6.57895	16.9566	5.32834	16.6119	0.293704	0.0775168	0.546707
MER4_7q21.2	12.4751	16.9881	18.1265	20.5748	-0.361056	0.0775382	0.546707
HERVH_2q32.3c	11.6033	50.617	4.70444	25.6271	0.320195	0.0776192	0.546707
HERVH_2q31.1b	15.0522	24.8305	22.0928	28.253	-0.372942	0.0777372	0.546707
HERVH_6q25.2b	7.65677	40.3016	5.73471	34.0447	0.294011	0.0778327	0.546707
HERVH_3q22.3b	20.1552	50.5735	10.8767	37.8186	0.410775	0.0779578	0.546707
HERVL_Xp11.23	39.5289	27.1704	49.4325	33.8907	-0.312381	0.0781863	0.546707
ERVLE_21q21.1c	8.82478	14.5295	6.52606	12.1638	0.330424	0.0783187	0.546707
HERVE_8p23.1b	20.0792	58.5423	53.622	118.323	-0.518184	0.0783862	0.546707
ERVLE_19q13.33	8.49182	11.5543	6.71452	10.4733	0.309069	0.0783992	0.546707
ERVLB4_3p21.31a	556.934	228.182	630.471	241.8	-0.172449	0.0784638	0.546707
ERVLB4_18q12.1c	6.01023	30.5065	4.78175	31.936	0.280383	0.0789644	0.548616
ERVLB4_15q13.3a	17.1053	25.8434	29.8673	47.8281	-0.401058	0.0789926	0.548616
MER41_3p22.1b	85.3551	58.494	103.531	73.393	-0.287664	0.0794815	0.550924
ERVLE_1q24.2	24.9018	20.1043	20.8547	19.2645	0.311257	0.079682	0.550924
ERVL_12q22a	7.83996	14.2617	16.7292	27.6847	-0.362336	0.0797088	0.550924
HERVL_17q12b	19.8835	53.134	29.9466	77.3426	-0.423804	0.0798756	0.551193
HERVL40_4q31.3b	121.867	94.6135	151.313	102.715	-0.306532	0.0802061	0.552588
ERV316A3_5q35.3a	64.5916	90.8586	89.442	121.258	-0.51186	0.0803694	0.552828
HERVL_11q14.1f	6.72633	23.2332	3.54629	8.15228	0.278081	0.0807975	0.552985
HUERSP3_2p13.3	58.9582	55.9955	74.2427	53.9486	-0.355236	0.0807995	0.552985
ERVLE_19q12b	18.4678	41.0025	21.206	27.6227	-0.390509	0.0808147	0.552985
HUERSP3B_Xq13.2b	167.606	96.9809	201.267	119.479	-0.277666	0.0810857	0.552985
HERVH_8p23.1f	10.4315	59.1032	1.67748	4.09662	0.253276	0.0813254	0.552985
HML2_19p12a	9.59385	42.899	3.48706	8.31544	0.296192	0.0813322	0.552985
ERVLE_21q21.1e	8.06392	10.831	7.86541	15.8488	0.312467	0.0815109	0.552985
ERV316A3_8q11.23b	4.76538	13.204	8.77394	15.2914	-0.298094	0.0815325	0.552985
ERVLE_1q25.3d	15.3514	20.297	23.5315	28.3465	-0.348988	0.081548	0.552985
HERVW_13q31.1	18.5763	65.982	9.73223	50.6771	0.3993	0.0820501	0.555516
MER41_3q13.31b	191.314	131.589	144.937	84.3644	0.276359	0.0823793	0.556584
ERVLB4_1q23.3d	5.63129	10.6544	11.3469	20.6842	-0.329117	0.082685	0.556584
HERVW_3q13.32	8.89979	32.5055	3.17496	10.3657	0.288167	0.0827019	0.556584
ERVLB4_5p15.33a	29.8354	124.985	30.3725	81.7576	-0.43578	0.0828727	0.556584
HERVH_13q31.3b	76.8811	274.814	31.5773	128.644	0.510188	0.0829697	0.556584
HERV3_8q11.23	810.307	1026.49	936.992	1116.05	-0.502692	0.0831277	0.556584
MER4_6q22.1a	12.164	16.2673	16.3169	16.1754	-0.32478	0.0831675	0.556584
HML3_10q26.3	43.5841	80.0908	107.273	228	-0.521234	0.0832575	0.556584
ERVLB4_4q24g	21.703	24.5977	17.6404	22.9306	0.395879	0.0833713	0.556584
HARLEQUIN_1q42.13a	6.29144	8.68534	6.04279	10.6648	0.278425	0.0836059	0.557286
HERVH_4q32.2c	94.1295	91.8657	107.791	75.2068	-0.324559	0.0840595	0.559444
ERVLB4_21q21.3e	2047.96	1046.37	1776.62	904.334	0.184316	0.0843703	0.56027
HERVH_1q32.1b	358.603	487.011	421.305	416.726	-0.762069	0.0844438	0.56027
HERVE_3p26.3	42.0737	56.2933	59.6706	91.7849	-0.450515	0.0854436	0.562895
HML1_3q21.3	774.7	747.187	1147.53	1380.6	-0.354394	0.0854977	0.562895
ERV316A3_21q21.1g	11.2418	34.5266	8.65799	49.668	0.338904	0.0856802	0.562895
HERVL_7q11.21b	87.6394	79.925	107.17	83.2031	-0.288977	0.0858611	0.562895
HERVH_19p13.12	930.736	2651.73	635.933	1436.17	-0.660313	0.0860009	0.562895
HERVH_8p23.1g	29.9066	204.018	2.45717	7.68055	0.288205	0.0862882	0.562895
HUERSP2_21q21.1b	13.3438	26.0715	8.09343	18.9603	0.370948	0.0862919	0.562895
ERVLE_4q33b	36.0268	100.328	338.412	2946.57	0.507822	0.0864919	0.562895
HERVH48_1p22.3	15.1395	18.6984	20.9648	20.3642	-0.341219	0.086861	0.562895
HERVH_3q26.31a	56.8679	139.126	29.6405	89.6262	0.521156	0.0869791	0.562895
ERVLB4_8q21.13d	115.023	151.121	157.922	170.072	-0.456878	0.0875208	0.562895
HERVH_6q22.31d	75.8361	170.987	182.292	524.107	-0.663035	0.0875247	0.562895
HERVL_13q21.33a	7.89459	27.9877	7.21062	34.4566	0.312292	0.0876006	0.562895
HERVL_22q13.31	729.752	693.663	906.72	682.53	-0.34455	0.0876867	0.562895
LTR25_9q22.2	8.43189	9.91475	7.01587	9.57107	0.287358	0.0876916	0.562895
HUERSP1_11q24.1	10.5619	17.5734	9.1439	21.2654	0.322027	0.0877437	0.562895
ERV316A3_11q23.3e	100.361	720.485	122.623	471.251	-0.520519	0.0877655	0.562895
ERVLB4_12q21.2	6.33571	7.63166	10.2694	12.1674	-0.268193	0.0879474	0.562895
HERVL40_4q32.1a	6.49829	11.4007	5.23128	9.52095	0.295156	0.0883341	0.562895
HERVH_2q36.1a	8.13958	35.774	2.51942	6.15883	0.263658	0.0884753	0.562895
HERVFH21_Xq11.2a	92.2986	123.244	146.951	206.688	-0.537313	0.0884885	0.562895
HERVL40_15q21.3	6.99613	10.1726	5.27802	6.83853	0.267005	0.0885046	0.562895
HERVL32_6p22.3	13.3835	91.6333	7.18539	60.1109	0.284117	0.088521	0.562895
ERVLE_3q24a	6.49799	13.5953	3.9794	6.77142	0.274602	0.0885754	0.562895
LTR19_Xp22.33	19.9434	39.8227	10.6038	16.4332	0.405128	0.0885947	0.562895
MER4_4q32.1c	16.8784	98.7999	19.024	138.033	0.327856	0.0886602	0.562895
HARLEQUIN_12p12.2	8.77309	33.8629	9.49918	44.7887	0.322469	0.0887596	0.562895
HML3_3q22.1	571.058	430.854	749.363	790.998	-0.266681	0.0888385	0.562895
LTR57_22q11.21	144.718	127.513	119.642	90.1172	0.323572	0.0888615	0.562895
HML1_6q23.2	406.587	216.195	378.652	294.186	0.247898	0.0889929	0.562895
HERVH_12p12.2a	30.6739	98.332	16.2526	49.9542	0.43585	0.0890912	0.562895
HML5_4q24	44.0829	44.5264	32.0952	24.4446	0.31854	0.0891299	0.562895
HML3_7q36.3	17.2728	44.9975	23.0792	58.8759	-0.399174	0.0893021	0.562895
MER41_6q26a	18.3756	47.8272	56.105	158.521	-0.478266	0.0893605	0.562895
MER41_9q21.12	88.4138	350.56	116.096	342.484	-0.544978	0.0894148	0.562895
ERV316A3_3q25.2c	70.5723	161.321	39.8895	96.4561	0.557437	0.0897657	0.564279
HERVH_7q21.2	93.1993	111.075	108.399	89.6503	-0.366912	0.0901336	0.565351
HERVS71_4p16.3	29.0732	55.7571	128.913	740.333	-0.508798	0.0901988	0.565351
ERVLB4_Xp21.1b	11.9011	21.63	7.31601	12.4378	0.350164	0.0903437	0.565433
ERVLE_8p11.22b	12.4508	40.5574	6.70179	14.0708	0.308081	0.0904745	0.565433
MER61_2p21	9.43776	10.6027	7.84792	10.9376	0.289514	0.0908085	0.566036
ERV316A3_11q13.3	1162.72	3588.01	1317.6	2770.85	-0.751032	0.0908339	0.566036
ERV316A3_8q24.12b	170.124	175.563	174.408	410.45	0.420401	0.0910901	0.56643
HERVL_14q24.2d	7.37494	13.336	5.72921	14.4352	0.288024	0.0911602	0.56643
HERVP71A_12p13.33a	14.9755	22.0766	26.8651	54.036	-0.381917	0.0915757	0.567346
HML3_Xp11.21	16.0964	18.3918	21.8483	20.872	-0.337978	0.0916243	0.567346
HERVH_2q34a	7.69777	19.892	4.75171	12.5218	0.313123	0.0917029	0.567346
MER4_22q11.1b	6.37134	25.4945	7.03656	46.2391	0.293401	0.0924043	0.568611
ERVLE_8q24.13f	28.3793	23.1424	32.1498	20.2315	-0.293683	0.0925796	0.568611
HERVIP10FH_20q13.12	93.7728	86.3647	77.4858	68.1349	0.333213	0.0926827	0.568611
MER101_18q21.1b	692.578	424.175	782.206	423.217	-0.205164	0.0927233	0.568611
MER4B_5q14.3	23.7319	26.5779	16.7936	18.2911	0.366412	0.0927917	0.568611
HERVK11_1p13.3	260.434	481.259	321.559	467.638	-0.483609	0.0929703	0.568611
ERV316A3_22q13.1	34.2818	41.4909	42.168	41.1995	-0.396	0.0931003	0.568611
MER4_Xq21.31i	15.785	44.8875	9.17644	28.8015	0.366791	0.0931651	0.568611
HERVL40_2q37.3	44.5037	51.4207	63.8819	84.987	-0.394644	0.0933265	0.568611
HERVW_17q12b	9.69841	14.4114	6.45952	9.02493	0.291012	0.0934426	0.568611
ERV316A3_18q21.1b	18.8679	30.9995	22.6608	28.4462	-0.357897	0.0934542	0.568611
ERVLE_20q13.32b	5.69596	11.4743	10.3794	18.8819	-0.304921	0.0934921	0.568611
HML1_1q32.1	57.954	77.7676	79.0816	92.4023	-0.574276	0.0936298	0.568646
HERVH_8p23.2b	24.7737	101.04	9.9081	32.8652	0.374202	0.0938134	0.568958
ERVLB4_21q22.3a	10.2931	16.6661	15.1012	19.9048	-0.325926	0.0943078	0.571152
HERVH_Xp21.1b	16.6233	66.4693	6.28434	14.6485	0.340543	0.0948056	0.573361
HERVEA_6q22.31	330.864	801.781	314.372	610.252	-0.648122	0.0950827	0.573588
HERVS71_Yq11.221b	13.7828	66.7971	24.5634	223.047	0.304268	0.0951668	0.573588
ERVL_2q21.1	11.0862	19.7656	7.42616	11.9714	0.319603	0.0952429	0.573588
ERVLB4_6q14.2	8.84305	13.1186	7.80311	13.7172	0.306686	0.0954649	0.573902
MER41_19q13.2b	7.98417	11.2354	6.09476	8.63492	0.272487	0.0956185	0.573902
HERVIP10FH_6q15a	11.0251	12.9672	17.9649	19.1492	-0.31369	0.0960417	0.573902
HERVEA_4q28.3	12.8445	89.9753	1.60859	4.18538	0.256114	0.0960769	0.573902
HUERSP3B_Xq21.33	32.6006	65.6724	52.9063	94.4244	-0.472288	0.0961824	0.573902
HERVH_18q12.1d	4.79502	30.7599	17.6529	156.593	0.258839	0.0963241	0.573902
ERV316A3_1q21.3d	5.48266	14.5565	10.8179	29.1691	-0.298996	0.096609	0.573902
MER4B_11q24.2a	8.70024	12.3497	6.9589	10.8718	0.310763	0.0966263	0.573902
LTR25_5q35.3	6.67804	39.6021	5.38423	27.9784	0.273624	0.0966385	0.573902
HERVH_10p12.31	15.298	23.0632	20.4521	27.6202	-0.366383	0.0966826	0.573902
HERV9_4p14	23.0866	25.1062	33.1191	42.6222	-0.362406	0.096761	0.573902
ERV316A3_4q26g	6.54328	24.4022	3.95781	14.1264	0.287489	0.097058	0.574872
HARLEQUIN_7q32.1a	6.8704	11.0357	5.35685	9.05232	0.268498	0.0974369	0.575282
HERVL_1q25.2	9.37122	13.3136	7.34702	10.914	0.283314	0.0975675	0.575282
PABLB_12p13.31	8.40143	15.1881	5.27037	9.34113	0.290083	0.0976548	0.575282
MER34B_7q11.23a	176.319	927.381	53.3563	57.2792	0.402636	0.0976788	0.575282
HERVH_14q32.2b	41.8441	201.254	21.3972	168.464	0.369341	0.0977953	0.575282
MER61_2q32.1b	15.6352	37.7382	23.0929	37.2314	-0.401903	0.0983587	0.577562
HERVH_8q21.13b	8.07898	10.8581	13.2683	16.4294	-0.296303	0.0984721	0.577562
HERVL_5p15.32a	17.3985	32.6964	21.2644	27.748	-0.374394	0.0985852	0.577562
HERVH_14q11.2b	85.0524	676.995	5.2945	29.4063	0.317861	0.0989902	0.578879
ERVLE_5q31.3d	14.5658	16.8103	11.5363	13.0069	0.306591	0.0990788	0.578879
HERVIP10FH_6q26a	429.607	1251.56	620.274	1467.93	-0.768962	0.0995688	0.579031
HML2_8p23.1d	69.6112	106.665	100.57	119.675	-0.561211	0.0996978	0.579031
ERVLB4_2p21	7.7995	11.6612	6.47414	10.2108	0.276351	0.0996982	0.579031
ERVLE_3p21.31f	163.928	134.659	149.216	162.177	0.296852	0.0998092	0.579031
HML6_6p22.2	49.744	57.3789	48.2225	104.207	0.390953	0.0998488	0.579031
HERVH_9p21.1b	6.93896	13.9069	5.96411	13.1043	0.289804	0.0999118	0.579031
ERVLE_17q25.3b	13.4325	28.5567	7.43558	12.3452	0.325975	0.100178	0.579716
ERVLE_12q23.3a	5.53314	8.21014	8.80127	9.68563	-0.26243	0.100299	0.579716
HERVE_2q13	6.83157	10.3	5.5019	8.87773	0.268726	0.100847	0.580646
HML6_19p12e	496.518	979.794	530.843	771.261	-0.546204	0.100859	0.580646
HERVIP10FH_8q24.3	225.072	141.227	292.525	243.958	-0.240359	0.10105	0.580646
ERV316A3_5q35.1a	17.2073	65.8554	26.5984	64.1524	-0.420072	0.101323	0.580646
ERVLE_9p24.1b	9.26963	20.7558	9.12933	20.5445	0.313811	0.101355	0.580646
ERV316A3_2q12.3d	25.0008	109.579	19.0061	23.1895	-0.361981	0.101546	0.580646
ERV316A3_8q24.13d	6.35161	11.6244	6.63594	19.568	0.27803	0.101861	0.580646
HERVL_3q25.2	6.53483	15.019	5.03906	13.1452	0.284763	0.101947	0.580646
ERVLB4_10q26.2b	18.1096	39.5605	11.3278	20.4901	0.342196	0.102009	0.580646
HERVL_9p21.1e	8.34536	13.192	6.70134	11.7221	0.278841	0.102012	0.580646
HERVH_10q23.2b	8.70071	13.2499	6.33848	10.4867	0.289764	0.102032	0.580646
HERVH_7q31.1b	608.787	1993.44	175.762	665.315	0.687982	0.102078	0.580646
ERVLE_8p22a	9.16871	13.2442	17.5528	31.4107	-0.329447	0.102539	0.581954
HERVH_4p15.1a	14.7564	45.51	7.85146	16.5566	0.32334	0.102578	0.581954
HERVIP10F_3p26.1	1201.56	4833.63	111.613	227.746	0.716656	0.102897	0.582317
HERVL66_19p13.11a	7.51471	10.7451	5.6104	8.53437	0.261876	0.102913	0.582317
HML1_7p14.3b	138.771	105.024	174.455	128.704	-0.261418	0.103206	0.583211
MER41_19q13.43a	241.663	139.997	275.884	162.64	-0.231274	0.103866	0.584813
HERVW_5p13.2a	85.8531	92.1672	98.7222	92.3006	-0.338179	0.103902	0.584813
ERVLE_11q24.3e	19.8701	50.1936	12.0234	28.0289	0.373223	0.103917	0.584813
ERV316A3_2p25.3b	46.6281	36.2619	36.6491	30.8815	0.303357	0.104163	0.584813
HERVL_12p11.23	19.1997	28.3831	11.6284	12.2045	0.310671	0.104196	0.584813
ERVLB4_3p14.2	510.483	582.476	328.428	331.474	0.476329	0.104347	0.584813
ERVLB4_12p13.2b	8.29041	9.66557	7.3801	9.24154	0.260075	0.104441	0.584813
ERVLB4_8p11.22b	13.3739	85.0012	3.1875	10.1851	0.285479	0.104981	0.586453
HERVH48_2p25.1	5.59946	7.31142	5.15709	8.03245	0.248022	0.105381	0.586453
HUERSP1_14q23.1	10.9532	17.7947	9.97934	22.2872	0.314128	0.105537	0.586453
HERVH_8q24.3	12.3058	14.6737	11.563	21.0904	0.302872	0.105552	0.586453
ERVLE_14q12m	11.629	20.5922	8.84268	22.8601	0.325052	0.105632	0.586453
HERVL40_11q13.4b	40.3986	33.681	55.4271	45.087	-0.317991	0.105639	0.586453
MER4_22q13.31b	87.123	161.977	108.376	195.311	-0.522079	0.105711	0.586453
ERVLB4_9q33.1a	11.8313	40.0056	4.72066	13.3381	0.306355	0.106041	0.586453
HML3_15q11.2	221.527	438.046	312.516	564.197	-0.722172	0.106081	0.586453
HERVL66_1q42.12	1483.86	9407.62	15.0918	31.6897	0.498488	0.106095	0.586453
HERVL_8q12.3a	4.68348	8.81552	8.39158	12.0765	-0.266341	0.106275	0.586531
HERVH_20p13a	10.7912	26.2166	9.14284	34.323	0.330222	0.106382	0.586531
ERV316A3_19q13.31	20.4348	36.206	29.9915	49.9278	-0.385848	0.106637	0.58709
HERVL_17p11.2b	167.877	282.692	240.656	384.549	-0.510535	0.106797	0.58709
ERVLE_2q34g	6.19046	11.43	4.38636	7.44017	0.243827	0.106902	0.58709
HERVIP10FH_5q14.2	366.254	1411.08	66.3201	240.705	0.593253	0.107029	0.58709
ERVLB4_Xq21.33f	25.6544	111.463	21.7819	123.874	0.380606	0.107646	0.589727
MER41_8q24.3	61.6959	141.724	40.2201	102.839	0.457333	0.108187	0.591335
HERVH_7q22.3b	133.591	315.465	232.99	719.348	-0.582367	0.108215	0.591335
HUERSP3B_11p12	16.953	26.5348	21.602	24.9235	-0.319036	0.108512	0.59212
ERVLE_Xq22.1a	111.453	88.535	133.596	100.433	-0.298196	0.108633	0.59212
MER4_4p11a	14.251	42.5811	12.1798	47.1368	0.363847	0.108916	0.59228
MER41_1q42.3	6.55006	8.28975	5.49066	7.99947	0.252382	0.108941	0.59228
HERVH_17q25.1c	1819.93	7692.28	1746.51	11911.7	0.603956	0.109173	0.59228
LTR57_10q21.3	20.6637	24.5423	28.5696	28.1931	-0.36103	0.109213	0.59228
ERV316A3_22q13.33a	192.082	201.257	229.872	232.402	-0.305085	0.109744	0.593477
HERVL_8q22.2	68.1988	65.7877	91.5499	94.7128	-0.349281	0.109772	0.593477
HERVL74_8q21.13	15.3026	38.6666	8.63102	12.1987	0.304091	0.109847	0.593477
ERVLE_5p15.33b	35.5827	118.428	17.8573	49.1826	0.387978	0.110364	0.59552
ERVLB4_8p21.1a	30.5959	50.791	31.1062	24.0056	-0.317745	0.11052	0.59562
PABLA_17q22	6.36783	11.1553	5.39738	11.0104	0.26872	0.110794	0.596271
HERVL18_2p13.3	9.52432	12.3884	12.1363	10.6944	-0.274402	0.110999	0.596271
MER101_16q22.1a	19.3818	18.0102	15.1602	14.7132	0.298059	0.111057	0.596271
ERV316A3_2p15a	12.9491	22.4606	8.61634	12.8382	0.306391	0.111276	0.596704
HERVS71_10q21.1	14.3501	37.0616	33.997	102.493	-0.386776	0.111422	0.596745
HML6_19p13.2d	241.048	378.62	240.038	191.444	-0.339272	0.111889	0.598504
HUERSP3B_15q25.1	9.45155	32.3707	12.6488	20.1176	-0.321943	0.112319	0.600055
HERVH_8q21.3c	4.13806	10.7882	9.28727	60.7355	0.26663	0.11305	0.602745
ERVLE_1p22.1a	8.5307	12.9794	6.62093	10.5119	0.281334	0.11313	0.602745
MER4_6q14.3b	11.1348	33.6969	5.57985	12.9487	0.288629	0.113371	0.602745
HERV4_1q22b	2566.52	1160.45	2265.67	1017.79	0.147095	0.113619	0.602745
ERVLE_1p31.1s	83.2397	218.329	53.5717	162.024	0.553574	0.113659	0.602745
HERVP71A_7q35	5.47227	14.5205	6.63319	37.5473	0.268171	0.113824	0.602745
HERVL_13q14.11b	331.458	216.358	356.9	175.774	-0.222728	0.113877	0.602745
HERVW_3p21.31	3.15279	10.3091	12.1854	37.2654	-0.287007	0.113942	0.602745
ERV316A3_6p25.3a	11.8984	15.9448	13.8975	13.2602	-0.273608	0.11441	0.60448
HERVW_7q31.1b	8.64732	36.9111	3.74134	10.1966	0.269813	0.114622	0.604857
HERVW_3p24.3	19.4789	56.735	31.1751	89.8094	-0.401842	0.114863	0.605386
HERVFRD_9p21.3b	363.723	370.673	404.931	443.784	-0.380834	0.115177	0.606013
ERVLE_1q44a	4.54682	9.31385	7.28429	9.73884	-0.247661	0.115263	0.606013
MER4_3p21.2	9.73953	14.6435	7.40238	10.1793	0.277866	0.115802	0.607118
MER34B_1q24.2	16.2306	18.828	20.1824	18.0466	-0.300335	0.115869	0.607118
ERVLE_1q32.2a	23.9094	46.4813	32.4821	48.3406	-0.400832	0.115945	0.607118
HML5_Xq27.3	3.22905	10.3516	7.9102	19.1225	-0.264751	0.116334	0.607118
HERVP71A_12p13.33b	26.8532	35.6708	41.85	59.8774	-0.401109	0.116407	0.607118
HERVIP10F_5q14.2	93.217	377.376	15.9631	55.7209	0.427572	0.116449	0.607118
ERVLE_2q11.2a	129.245	101.46	136.655	67.0883	-0.237894	0.116576	0.607118
MER101_Xq23a	15.5681	20.4811	12.6303	19.4768	0.312079	0.116602	0.607118
HERVL_5p14.1g	37.8507	171.606	9.30315	44.1546	0.3736	0.116807	0.607453
ERVLE_1p36.22	34.346	28.2572	28.4284	22.5944	0.287934	0.117059	0.607584
MER34B_11p15.5	67.9194	129.585	49.2331	126.732	0.52309	0.117114	0.607584
HERVH_9p21.3a	145.088	273.385	217.737	345.934	-0.597444	0.11769	0.608499
HERVL_4q24a	7.21623	10.5361	5.56435	8.7694	0.257369	0.117709	0.608499
ERVLE_4q31.21a	16.8651	30.4986	10.5669	16.7033	0.342919	0.117855	0.608499
MER41_9q33.3	5.97591	9.61441	4.44311	7.19011	0.243389	0.117856	0.608499
HERVK14C_2p12	7.32997	29.7987	3.04819	7.69866	0.248294	0.118596	0.610977
HUERSP1_6p21.1	72.7181	52.533	84.1289	55.6588	-0.254592	0.118641	0.610977
HML5_2q32.1	9.03595	13.5437	12.2204	13.4518	-0.273502	0.118762	0.610977
HERVW_6q21a	8.19059	11.3562	6.45134	9.02068	0.266805	0.118909	0.611006
PABLA_19q13.2	29.7084	47.8639	37.2338	45.7371	-0.396905	0.119248	0.611501
PRIMA4_8q22.3	5.16639	8.2216	8.20127	10.033	-0.251891	0.11929	0.611501
HERVL_14q24.2c	13.1137	16.0613	11.8765	16.4877	0.297441	0.119492	0.611809
MER41_17p11.2a	13.7241	17.2942	11.3029	12.8893	0.285729	0.119924	0.613291
ERVLE_11q13.5b	9.99172	19.5849	13.5564	18.2502	-0.303599	0.120341	0.613985
HERVL_8q12.3b	11.1011	25.8199	14.3129	18.5425	-0.303376	0.120344	0.613985
ERVLB4_18p11.32e	18.4926	48.8608	55.4051	136.433	-0.464921	0.12089	0.614042
ERVLE_11q22.3l	4.99763	14.3849	10.8274	23.1574	-0.291383	0.120985	0.614042
HUERSP3_Yq11.222c	2.95966	9.12288	10.5623	80.9735	0.242924	0.121421	0.614042
HERVH_3p11.1a	12.3993	87.7374	4.79499	26.4022	0.248361	0.121422	0.614042
HML2_19q11	9.02918	28.8092	6.1164	17.4474	0.295132	0.121517	0.614042
HERVI_18q12.2	4.59984	13.1061	8.13048	18.6088	-0.255318	0.121779	0.614042
ERVLB4_8p23.1e	20.6585	64.7563	10.648	26.4103	0.361924	0.121812	0.614042
MER41_14q13.1	8.22401	12.6607	7.50069	13.6873	0.284609	0.121843	0.614042
HERVH_19q13.32e	45.2826	62.6801	46.4058	160.462	0.417131	0.121879	0.614042
MER41_16q21	23.9042	34.7087	14.6083	19.1035	0.351725	0.121927	0.614042
HARLEQUIN_19p12b	53.0776	149.049	67.1536	140.092	-0.499051	0.122125	0.614042
HERVH_14q21.3b	160.411	1469.09	5.98627	54.5924	0.243387	0.122248	0.614042
MER34B_3q26.1	10.5336	32.359	11.2631	39.5797	0.318086	0.122329	0.614042
MER41_12q12	53.8108	53.2861	42.1701	42.8523	0.357308	0.122352	0.614042
ERVLE_11q13.5a	50.8897	80.2187	49.2946	51.4108	-0.375801	0.12258	0.614353
HERVFC1_7q11.21	840.589	753.382	983.278	710.346	-0.2824	0.122718	0.614353
HERVH_9q22.2	54.1607	468.525	7.56295	44.402	0.304416	0.122872	0.614353
ERVLB4_12p13.32	25.2062	49.8841	16.3979	23.4941	0.341677	0.123071	0.614353
HERVEA_8q11.23b	17.2879	18.793	19.5904	15.7407	-0.28155	0.123127	0.614353
ERVLE_2q24.3b	5.90862	8.43001	5.06529	9.19773	0.24371	0.123805	0.616336
ERVLB4_8p23.1h	4.84294	21.7926	5.49686	33.438	0.248518	0.123811	0.616336
LTR19_19p13.2b	76.6401	61.1484	104.36	118.139	-0.299692	0.124544	0.617737
HML3_13q12.11b	64.6966	53.4983	83.099	78.6866	-0.286197	0.124817	0.617737
ERVLE_18q21.33	13.6805	15.852	17.1938	16.7213	-0.284215	0.124907	0.617737
HERVL40_20p13	17.8222	25.8945	24.6681	29.5974	-0.341427	0.125062	0.617737
HERVL_1p22.1a	7.21906	26.5601	4.14501	6.90834	0.230345	0.125126	0.617737
HERVP71A_7p15.3b	26.5083	118.252	8.29067	18.4072	0.327335	0.125215	0.617737
HERVIP10FH_7p14.1	10.6098	30.8934	8.43229	38.1135	0.299622	0.125217	0.617737
HERVH_3q26.1a	14.273	78.4522	3.47109	9.34434	0.275639	0.12524	0.617737
HERVH_8p23.1i	41.3277	75.874	70.1985	158.86	-0.480587	0.125869	0.620127
ERVLE_8q24.3j	13.1424	13.186	10.7733	10.8898	0.261037	0.126085	0.620485
HUERSP3_1q44	17.3589	69.0771	15.163	22.7728	-0.311154	0.126332	0.620625
HERVL_6p24.3a	9.74712	11.6121	14.1525	14.8298	-0.282319	0.126402	0.620625
HERVH_5q31.1g	8.62433	22.058	4.87036	12.4697	0.275684	0.126936	0.62124
HERVL_Xq28b	27.233	34.5732	21.175	22.0681	0.31526	0.127101	0.62124
HERVH_15q14b	145.238	951.494	56.8964	288.737	0.482919	0.12711	0.62124
HERVH_3q25.1	45.9141	52.987	52.0084	52.1901	-0.314112	0.12712	0.62124
HERVH_8q24.23c	34.9341	108.935	41.5725	89.4061	-0.433867	0.127249	0.62124
HERVIP10F_Xp21.1	10.9084	16.4666	23.8385	78.3601	-0.297212	0.127908	0.623376
HERVH_19p13.3a	6010.93	30859.1	4709.33	23115.7	0.860484	0.128046	0.623376
HERVE_7q21.3	321.114	308.953	392.419	295.427	-0.270044	0.128121	0.623376
MER34B_1p13.2	45.1473	63.1606	46.0122	113.081	0.372041	0.128382	0.623844
HERVL18_9p21.1	4.34633	11.3927	11.2545	74.1728	0.264264	0.128534	0.623844
ERV316A3_4q28.3k	10.346	31.4376	8.69999	37.4546	0.311743	0.128789	0.623844
MER101_6p25.2c	69.2871	59.4605	81.4888	63.3256	-0.274378	0.128796	0.623844
HERVH_6p22.3a	23.1898	40.7577	37.9832	92.1137	-0.361376	0.129307	0.625387
MER101_7q11.23	21.1467	21.772	18.1846	24.678	0.30191	0.129405	0.625387
HML5_8p23.1b	10.6756	68.6799	1.11437	2.93561	0.207396	0.129615	0.6257
ERVLB4_8q22.1	12.7425	14.763	18.5426	19.6473	-0.294429	0.13027	0.626561
MER41_17q22e	8.0016	15.9494	5.20323	9.1899	0.262841	0.130285	0.626561
HERVH_3q26.1f	9.36083	83.6123	1.45349	8.78461	0.207694	0.130472	0.626561
HERVW_13q21.1	58.7885	179.843	23.522	69.4349	0.456842	0.130483	0.626561
ERVLB4_2q13a	5.64033	10.9509	4.76666	10.6378	0.235369	0.130521	0.626561
HERVL18_6p22.1c	698.642	700.319	548.612	543.034	0.314724	0.130882	0.62662
MER61_8q23.1b	12.2205	15.6775	11.2273	21.8831	0.284837	0.131181	0.62662
HERVH_2p24.1	11.0083	29.5375	8.47246	29.1011	0.295334	0.131262	0.62662
ERVLE_12q22	8.2366	10.3812	8.03156	13.0735	0.273855	0.131352	0.62662
ERV316A3_6p25.2c	40.4516	139.681	40.1711	81.4826	-0.427978	0.131598	0.62662
MER41_7p21.3b	12.3937	40.2269	6.56178	23.1083	0.295204	0.131692	0.62662
MER41_8p23.1	9.37905	19.4432	6.29587	13.4548	0.291938	0.131695	0.62662
MER4_2p11.2d	12.9601	16.4194	15.927	15.564	-0.273967	0.131758	0.62662
MER4B_5p13.1d	7.23588	58.8268	6.1016	50.3977	0.226758	0.131847	0.62662
HERVH_Yp11.2e	75.0406	312	36.8267	83.3748	0.464491	0.132033	0.62662
PABLB_1q31.3a	155.343	142.141	195.529	200.057	-0.312871	0.132782	0.62662
LTR46_8q24.3	316.458	393.937	315.625	208.523	-0.300542	0.132873	0.62662
ERV316A3_9q32a	4.9349	10.9049	8.89327	15.844	-0.251698	0.132954	0.62662
HERVH_5q15a	527.294	1450	370.391	1710.34	0.680294	0.13296	0.62662
HERVH_1p33	31.6049	48.319	50.7624	84.826	-0.394882	0.133069	0.62662
HERVKC4_19q11	7.93617	14.0311	5.98842	9.93597	0.254599	0.133091	0.62662
HUERSP3B_Yq11.222b	12.1202	42.2707	34.541	250.607	0.329487	0.13312	0.62662
ERVLE_22q13.2b	13.7741	20.6934	10.2076	13.9739	0.285205	0.133194	0.62662
HERVH_6q16.1b	54.7172	124.699	50.2687	219.712	0.47229	0.133299	0.62662
ERVLB4_Xp11.21b	6.60541	10.4991	10.0866	14.0389	-0.254891	0.134274	0.630516
ERV316A3_13q31.1f	4.69514	16.4091	7.84561	53.2917	0.244335	0.134685	0.631369
ERVLE_13q21.1a	5.21094	14.8388	7.82539	11.3087	-0.24325	0.134749	0.631369
ERVLB4_22q11.21a	51.6225	75.7412	30.2561	30.3598	0.366021	0.1351	0.632324
HERVE_11q13.2c	13.3091	17.0834	11.0289	15.7762	0.303618	0.135269	0.632429
PRIMA4_12p11.21b	308.416	157.419	278.112	142.755	0.176476	0.135629	0.633425
HERVL_4q34.1c	28.7398	98.331	34.0322	103.472	-0.377597	0.13602	0.634435
PRIMA4_4p16.3	230.895	176.012	198.195	77.8228	0.15198	0.13614	0.634435
HUERSP2_13q21.1	14.3463	61.7579	5.53784	22.6442	0.288791	0.13635	0.634726
ERV316A3_2q34f	9.81202	13.4368	8.62396	12.8508	0.253466	0.137199	0.636676
HERV3_Yq11.223b	27.248	44.1948	30.2019	95.0666	0.405283	0.137215	0.636676
HERVH_1q42.13d	64.9784	590.003	1.32011	4.54296	0.217375	0.137229	0.636676
MER41_Xq25a	10.392	78.3053	14.4981	127.207	0.23786	0.137623	0.636676
HUERSP3B_1p33b	10.8808	24.6743	6.59055	11.9279	0.278799	0.137651	0.636676
HERVL40_9q31.1a	70.8995	42.783	61.806	42.2269	0.235629	0.137656	0.636676
HERVK14C_16p12.3	44.5031	88.548	55.6083	87.1412	-0.436506	0.138695	0.640796
ERV316A3_5q14.3a	38.4707	61.7544	47.401	55.7796	-0.36971	0.138973	0.640836
MER61_Xq11.1	7.14073	10.5092	5.92779	9.22323	0.241122	0.139003	0.640836
HERVH_1q41d	26.3354	140.191	49.8104	389.922	0.347855	0.13915	0.640836
MER61_8q11.23b	14.8142	54.3694	38.0282	165.823	-0.348025	0.139542	0.640937
MER4B_10q21.3	8.90668	12.5409	7.13286	9.56583	0.237781	0.139579	0.640937
HARLEQUIN_2p24.3	7.27654	33.038	5.47611	20.2392	0.265859	0.139619	0.640937
HERVIP10F_1p35.2a	367.537	1349.95	288.297	1052.79	0.606951	0.140068	0.641149
HML2_3q21.2	178.391	199.198	223.047	258.078	-0.316118	0.140194	0.641149
ERVLE_15q14d	9.84429	25.2085	6.96735	17.7235	0.285516	0.14026	0.641149
HERVW_7q21.2	104.437	236.295	99.3453	178.257	-0.397987	0.140261	0.641149
HERVH_6q16.1a	139.728	475.15	43.028	187.713	0.514216	0.140521	0.641656
HERVIP10FH_6q22.1	56.1182	68.2693	65.3427	47.5084	-0.276106	0.140752	0.641802
HERVE_8p23.1c	9.62439	47.6059	4.48686	22.5869	0.245303	0.141055	0.641802
MER41_13q34a	8.36536	52.3976	3.3758	7.99239	0.228664	0.141151	0.641802
ERV316A3_1q25.3b	84.0193	118.127	102.472	116.39	-0.350395	0.141278	0.641802
ERV316A3_21q22.11b	446.62	274.006	504.418	272.378	-0.194942	0.141333	0.641802
ERVLE_1q23.3a	91.9134	190.317	83.1146	149.839	-0.410165	0.141784	0.641802
HERVH_8q22.1a	2142.11	10206.6	653.258	1913.78	-0.491473	0.142006	0.641802
ERVLE_14q31.3c	7.63204	12.8663	8.97309	24.5564	0.279565	0.142045	0.641802
HERVH_13q14.3a	3.41939	11.8254	14.2147	43.3578	-0.282801	0.142108	0.641802
ERV316A3_15q26.2b	87.434	744.443	7.72825	37.9789	0.293691	0.142143	0.641802
HERVH_12p11.21	14.4487	130.767	0.723006	2.95631	0.200699	0.142369	0.641802
ERVLB4_4q34.3e	9.52615	23.0768	8.94978	27.2994	0.299179	0.14275	0.641802
MER4_10q23.31a	129.923	130.959	99.2075	77.7308	0.281251	0.142838	0.641802
MER4_10p15.1	1209.04	2053.88	671.383	1112.47	0.507921	0.143072	0.641802
HERVH_1p31.1k	28.2317	147.248	4.49496	12.7548	0.298142	0.143418	0.641802
ERVLB4_5q21.3a	5.1583	9.25596	4.87863	11.2777	0.244806	0.143755	0.641802
ERVLE_10q22.3	6.14155	8.95018	5.87983	10.6123	0.233567	0.143898	0.641802
MER41_17q21.32b	3.13763	11.6134	9.15624	74.8405	0.224261	0.144277	0.641802
HERVH_14q21.1b	15.742	54.4529	144.043	1042.12	-0.395504	0.144758	0.641802
HERVH_13q31.1e	11.6389	56.1925	11.447	85.174	0.286744	0.14496	0.641802
ERVLB4_11q24.3a	13.3851	88.5841	2.71744	5.88163	0.250255	0.145029	0.641802
HERVH_18q12.3c	12.234	63.8536	3.49308	10.1798	0.253711	0.145532	0.641802
MER101_2p25.2	97.3721	96.2751	120.223	100.845	-0.322294	0.145604	0.641802
HERVE_11q13.2a	16.9572	28.3839	18.4138	41.7087	0.353258	0.145873	0.641802
HML3_19p12c	10.2533	12.8913	15.2992	21.0792	-0.276456	0.146108	0.641802
MER4_3q29a	24.3234	46.8401	43.3606	119.558	-0.362477	0.146238	0.641802
MER34B_9p21.3b	1469.9	1281.41	1739.29	2516.54	-0.325479	0.146305	0.641802
ERV316A3_14q24.2f	12.0176	45.2623	12.3504	62.6182	0.28085	0.146431	0.641802
HERVL_9q21.13a	14.298	17.0321	13.6807	23.7314	0.281512	0.146543	0.641802
MER41_1p36.12	5040.91	3962.5	4282.26	3388.85	0.203178	0.146804	0.641802
ERVLB4_7q21.13d	17.0606	44.0158	7.82672	16.138	0.308553	0.146846	0.641802
HARLEQUIN_18p11.22a	8.80703	19.8816	7.21256	23.762	0.286115	0.146945	0.641802
HERVH_13q21.1d	11.622	91.3687	20.9071	163.069	0.248999	0.147108	0.641802
MER41_4q22.1c	12.1493	29.3504	11.3337	32.8398	0.320962	0.147182	0.641802
MER4_2q11.2a	24.5531	24.2976	19.8392	20.3348	0.291462	0.147198	0.641802
HERVH_16p12.3	31.2315	41.6292	34.6198	34.6934	-0.321934	0.147219	0.641802
HERVH_2p12c	6.40396	18.0175	8.75207	39.7283	0.260748	0.147531	0.641802
LTR19_3q13.33a	8.98303	10.9794	7.53352	10.69	0.250236	0.147553	0.641802
ERV316A3_2p15b	6.17599	11.1557	4.7355	8.48177	0.234257	0.147788	0.641802
PRIMA4_1q21.2d	56.4323	66.816	46.0274	65.8971	0.462113	0.147809	0.641802
HERVW_2p16.2	178.441	139.251	224.171	184.58	-0.259853	0.148067	0.641802
HERVS71_7p14.3	1571.38	936.628	1730.29	926.245	-0.183802	0.148175	0.641802
MER41_7q11.23	17.7905	17.6539	15.6206	18.1283	0.283686	0.148326	0.641802
HERVP71A_6p22.1	128.537	163.644	145.255	136.603	-0.336997	0.148494	0.641802
MER41_19q13.43b	14.761	13.7797	12.5094	12.4647	0.262312	0.148592	0.641802
MER101_10q11.22d	16.2406	21.1147	30.9172	63.9938	-0.325608	0.148739	0.641802
HERVIP10F_19q13.41a	796	874.169	522.552	430.434	0.340861	0.148994	0.641802
MER41_Xq13.3b	18.5776	17.6176	15.9781	17.5047	0.277094	0.149042	0.641802
HERVH_5p14.3a	11.1045	49.045	33.3573	147.936	-0.346449	0.14914	0.641802
HERVFRD_7q21.3	31.2202	48.0806	36.4416	49.7175	-0.333128	0.149636	0.641802
MER41_2q22.3	9.47267	20.1937	8.0059	18.1929	0.285232	0.149691	0.641802
HERVH_12p12.3d	13.7121	39.7189	12.0706	42.4323	0.315789	0.15014	0.641802
HERVH_1p31.3a	4.99036	7.55782	7.95292	10.249	-0.218744	0.150143	0.641802
ERVLE_2q35a	25.0823	37.1713	17.5402	16.9903	0.288173	0.150208	0.641802
HERVL18_1p31.1b	11.0025	61.7938	1.8014	5.05309	0.238579	0.150239	0.641802
ERVLE_1p36.12	119.926	94.7642	94.3248	70.6124	0.267161	0.150717	0.641802
PRIMA41_13q22.3	26.9183	217.888	5.65146	36.9204	0.234002	0.150745	0.641802
HERVE_10p13b	34.0525	57.9259	76.8652	145.878	-0.427699	0.150887	0.641802
ERV316A3_5p14.3e	17.0524	77.4086	17.1629	73.3436	0.341658	0.151002	0.641802
ERVLB4_3p21.31e	19.4958	23.7783	15.8792	25.7976	0.281838	0.15102	0.641802
HERVH_8q24.21b	332.007	2305.01	21.7776	131.228	0.398462	0.151122	0.641802
HERVH_11q13.2e	102.982	756.221	12.6888	52.2003	0.326539	0.151154	0.641802
MER41_15q22.31b	39.8418	33.2353	49.3258	38.2412	-0.276207	0.151266	0.641802
HML5_Xq11.1	10.213	19.1113	12.5473	15.1405	-0.267368	0.151302	0.641802
LTR25_Yq11.223h	20.655	37.5037	19.1468	38.7971	0.356963	0.151317	0.641802
ERVLE_15q26.3a	17.3911	55.0608	25.1974	45.6247	-0.36332	0.15134	0.641802
HERVIP10FH_14q12	145.865	760.408	42.4634	50.9611	0.311432	0.151462	0.641802
HERVL_1q31.2c	10.0801	18.4859	17.2686	38.4458	-0.290276	0.151588	0.641802
ERVLB4_2q37.1b	44.9738	46.9254	56.2604	54.3034	-0.296737	0.151598	0.641802
ERVLE_11q13.4g	165.317	130.032	185.914	144.927	-0.294058	0.151869	0.641802
ERVLE_11p12a	8.21063	18.9415	5.95973	16.3896	0.274945	0.151896	0.641802
HERVW_Yq11.222b	377.018	1015.48	280.967	559.766	0.690947	0.152017	0.641802
HERVL66_4p15.2	48.174	53.8659	54.757	51.4385	-0.322954	0.152049	0.641802
HERVS71_5q15	33.4155	41.1936	33.6216	26.869	-0.29549	0.152098	0.641802
HERVIP10FH_3q13.33	23.3719	48.4257	18.8691	53.909	0.353708	0.152163	0.641802
HUERSP3_7q11.21b	14.5363	29.73	8.12326	12.6667	0.2766	0.152169	0.641802
HERVH_8q24.23a	602.065	2780.13	304.659	1376.25	0.615745	0.15222	0.641802
HML5_19p12b	28.3587	64.7232	15.5136	30.8683	0.357192	0.152496	0.641802
ERVLB4_19q13.42d	31.8388	45.6189	23.267	27.0635	0.320082	0.152571	0.641802
HERVH_14q32.31b	111.686	99.8301	94.6985	72.1012	0.277042	0.152695	0.641802
HERVH_5q23.1c	640.271	5703.4	13.1871	57.5686	0.341548	0.15272	0.641802
HERVW_11p14.2	351.117	1070.37	126.456	451.681	0.608022	0.152865	0.641802
HERVH_6q22.31e	12.6833	47.5121	4.54396	17.306	0.277454	0.152923	0.641802
HML2_7p22.1	127.704	535.835	128.737	663.875	0.513579	0.153398	0.643168
HARLEQUIN_4p15.2	10.1759	39.6897	5.2642	17.2741	0.268091	0.153572	0.64327
ERVL_22q12.3b	28.3723	53.073	30.816	35.6406	-0.322425	0.153928	0.644135
HML5_2p13.2	1452.14	611.449	1321.79	548.262	0.129917	0.154484	0.644988
HERVIP10FH_Xp21.1	92.7664	105.114	169.016	416.614	-0.349893	0.154654	0.644988
HERVH48_14q24.2	294.85	1924.73	101.93	91.9878	-0.326129	0.154687	0.644988
ERVLE_1p34.1b	6.36959	10.1203	4.66908	6.27242	0.224474	0.154731	0.644988
HERVL40_10p11.22	4.99594	7.74026	8.51081	12.3816	-0.232697	0.15537	0.646413
HERVH_1p31.1i	24.4317	115.578	195.487	1743.99	0.329075	0.155516	0.646413
HML1_7p14.3a	53.9265	37.9444	69.5212	50.2765	-0.243317	0.155524	0.646413
MER4_20p11.21a	83.4261	68.9457	67.0661	55.3135	0.266273	0.155834	0.647077
HUERSP1_2q35	11.04	16.6271	8.22217	11.8545	0.263957	0.155999	0.647142
HERVL18_4q22.1	5.48213	6.53048	5.4776	8.01607	0.213733	0.156344	0.647948
HERVH_2q24.1b	13.0264	89.9501	52.0756	462.094	0.262115	0.156624	0.648485
MER61_1q43	2011.75	2689.15	1321.33	2053.71	0.770598	0.157006	0.649105
MER4_14q22.3a	10.1172	19.2083	7.02063	10.3295	0.275975	0.157159	0.649105
HUERSP2_12p13.31	59.6681	56.3249	67.6988	51.7025	-0.269924	0.157304	0.649105
ERVLB4_6q16.1d	457.8	268.222	504.735	253.096	-0.179561	0.157377	0.649105
ERVLE_8p23.1a	5.94036	11.0545	4.42145	7.28248	0.215484	0.157986	0.650992
LTR23_9q22.33a	313.162	233.554	334.336	227.77	-0.273903	0.158921	0.65422
HERVH_11q24.3a	7.39587	17.4083	6.33689	20.5636	0.262331	0.159457	0.654265
HARLEQUIN_6p21.31	145.979	248.241	108.894	66.4598	0.225026	0.159633	0.654265
HERVH_3p21.31e	150.349	298.515	70.8216	71.6523	0.385154	0.159644	0.654265
HERVL_17q12a	15.4747	18.3634	19.8102	18.5827	-0.280531	0.160211	0.654265
HERVH_7p15.3a	28.7184	223.573	3.72605	6.99737	0.239891	0.160366	0.654265
HERVFH19_13q34	6.6974	12.8386	10.9582	17.7277	-0.252575	0.160742	0.654265
HERV4_5q33.1	9.90581	13.5742	20.1059	35.9244	-0.291257	0.160809	0.654265
HERVW_1p22.2a	189.463	154.568	204.937	127.53	-0.249423	0.160901	0.654265
HUERSP2_5p13.2	9.1203	37.9199	4.87631	17.6865	0.250448	0.161085	0.654265
HERVH_2q32.1c	23.0384	61.5811	28.335	37.9312	-0.367097	0.161307	0.654265
HERVH_7q35b	10.287	19.7995	9.94388	28.5538	0.285382	0.161314	0.654265
HERVL_3p21.31b	8.20403	9.0867	11.1535	10.2689	-0.224516	0.161321	0.654265
ERV316A3_7p13a	45.056	37.3135	53.4132	39.5973	-0.253712	0.161333	0.654265
HERVL40_5q12.3	32.3356	26.7746	38.6502	31.3909	-0.243288	0.161361	0.654265
HERVH_5p15.2b	14.4991	37.0998	9.67201	23.1814	0.311933	0.16145	0.654265
HML2_1q32.2	45.605	87.5294	49.5733	106.29	-0.364936	0.161484	0.654265
ERV316A3_3q27.3c	45.262	188.873	34.132	177.135	0.360644	0.161654	0.654265
HERVW_4q23	20.8815	22.7427	16.065	19.8019	0.287905	0.161667	0.654265
HERVK11_15q15.1	2693.27	1206.03	2996.57	1458.94	-0.158203	0.16271	0.657868
HERV3_Xq26.3	9.11039	12.5179	12.2285	15.2638	-0.246162	0.163304	0.658725
HML3_3q13.33	14.6128	22.5037	29.4156	69.8562	-0.305039	0.163319	0.658725
HERVL_1q21.2a	23.4156	46.8457	17.7855	35.551	0.354002	0.16365	0.658725
HERVL_3p13b	45.4854	109.013	46.365	68.7634	-0.366958	0.163688	0.658725
HERVW_7p14.1	49.5554	213.86	28.8241	133.899	0.375626	0.16377	0.658725
MER41_11q25	7.06279	30.8012	3.68189	8.48357	0.234903	0.163938	0.658725
HERVH48_8q21.2	27.3881	31.6215	37.2262	42.7887	-0.309067	0.164044	0.658725
ERVLB4_3p21.31c	22.1358	49.8834	11.7911	19.3125	0.319596	0.164146	0.658725
HERVH_4q32.2b	7.12915	31.6566	5.85934	18.1308	0.242794	0.164597	0.659921
MER41_14q12	17.3263	30.5841	11.4232	19.0052	0.317852	0.164773	0.660014
HERVEA_Yq11.21	54.3669	149.132	54.1582	193.24	0.461874	0.165165	0.660517
HERVL_3q27.1	11.6511	90.0098	2.51747	9.33754	0.195356	0.165206	0.660517
MER61_12p13.31a	7.84388	13.4872	5.9672	11.9829	0.245947	0.165415	0.660739
HERVL18_4q21.23	167.049	161.672	228.041	268.046	-0.381722	0.165875	0.660876
ERV316A3_4q21.1a	10.327	12.1706	13.2535	12.7721	-0.239621	0.165895	0.660876
HERVH_3q13.2	401.825	3243.85	315.586	1230.5	-0.520241	0.165983	0.660876
MER4_1p34.1b	36.709	128.562	13.2812	52.4582	0.335273	0.166063	0.660876
MER4_17q11.2a	17.102	23.8397	19.0712	52.5121	0.299082	0.166486	0.661946
LTR46_Xq13.3	47.4603	60.0823	50.6802	52.6424	-0.334017	0.166753	0.662155
MER4_8q24.3d	167.809	109.991	200.39	128.475	-0.220858	0.166846	0.662155
MER4B_1p22.1c	7.06805	16.1232	6.11037	15.0454	0.236251	0.167341	0.662851
HERVK11D_6q22.31	13.8923	21.886	19.8549	33.9175	-0.273676	0.167482	0.662851
HERVL40_2q33.1	79.044	112.716	80.7298	98.2587	-0.37448	0.167928	0.662851
HERVL18_6q13	19.1374	137.326	6.81913	31.0575	0.248812	0.168719	0.662851
HERV9_1p31.3	25.4601	34.4002	19.2637	30.5897	0.316159	0.168782	0.662851
ERVLE_9q33.2b	12.2304	19.0505	10.5	16.8161	0.279475	0.168785	0.662851
HERVL40_12p13.2a	3.7035	6.88171	6.91837	10.9214	-0.220368	0.169033	0.662851
MER41_Xq11.1b	12.6274	64.4651	7.17269	37.3044	0.264594	0.169053	0.662851
HERVH48_21q22.3	1556.74	6718.96	331.231	1386.18	0.395448	0.169073	0.662851
ERVLB4_3q13.13	11.5468	15.2112	15.1037	16.7514	-0.260491	0.169206	0.662851
HML6_19q13.43b	20282.8	10361	18084.1	8812.56	0.134279	0.169357	0.662851
HERVH_10p12.1b	25.401	122.097	8.55843	21.76	0.302522	0.169385	0.662851
HML5_14q31.1	93.1217	341.96	67.0175	139.173	-0.429525	0.169805	0.662851
HERVK11_19p12b	9.06544	16.6659	8.3093	22.9676	0.263629	0.169883	0.662851
MER4_Xq28d	11.7437	16.9385	9.10704	13.401	0.267858	0.170001	0.662851
ERVLE_8p12b	5.71557	8.73079	4.53516	6.60426	0.201332	0.170166	0.662851
ERVLE_2p11.2f	5.71658	10.4311	4.81184	9.46879	0.223524	0.170262	0.662851
HERVH_12p13.31d	6.82201	10.0503	12.3077	18.9435	-0.254364	0.170295	0.662851
ERV316A3_5p15.2e	219.65	611.685	173.143	336.991	-0.581264	0.170385	0.662851
ERV316A3_6p25.2a	9.69695	33.9735	4.75939	13.1125	0.251237	0.170438	0.662851
PRIMA4_18q23b	55.7617	93.6222	53.883	52.2714	-0.305214	0.170448	0.662851
HML2_15q25.2	21.5756	28.3333	32.9703	60.3711	-0.323095	0.170613	0.662851
ERVLB4_12p12.3d	7.8276	31.8506	4.1392	10.8353	0.223396	0.170654	0.662851
HML6_16p11.2	17.1178	26.3841	25.0503	55.8671	-0.287248	0.170716	0.662851
MER4_17p11.2a	10.6905	17.9122	10.0236	18.4583	0.259608	0.171325	0.664617
HERVH_3q26.31c	43.2748	94.7993	42.6618	55.0899	-0.363355	0.171976	0.666542
MER61_13q31.1d	133.101	629.898	72.5558	446.93	0.419299	0.172204	0.66669
HERVH_6q23.2e	21.8445	67.569	21.7491	85.4101	0.345377	0.17234	0.66669
HERVL_8q21.3c	8.09566	17.2351	4.79928	8.59022	0.229651	0.172479	0.66669
HUERSP3B_12q23.3a	37.4728	61.6321	23.5866	31.6377	0.33475	0.172662	0.666802
HERVH_4q28.3c	6.82905	22.9013	3.70492	9.42571	0.220624	0.173181	0.668206
MER41_17q23.3b	26.9466	42.1364	17.0335	22.9365	0.317652	0.173788	0.668659
ERV316A3_2p22.3c	58.8658	273.945	16.5037	71.633	0.342738	0.173914	0.668659
HML3_12q23.3	43.7906	122.012	95.1369	498.529	-0.393664	0.174022	0.668659
HERVL74_7p21.2a	26.7403	38.2474	17.4699	24.6661	0.340274	0.174088	0.668659
ERVLE_11q23.3e	8.34803	15.5855	12.4872	22.8126	-0.251057	0.174149	0.668659
ERVLE_14q32.32c	8.01693	16.2767	5.99599	11.5615	0.234213	0.17445	0.668659
HML5_19q11	511.914	472.667	381.725	258.492	0.269014	0.174529	0.668659
MER4_Xq21.1a	16.2611	27.1006	21.8051	28.1183	-0.295447	0.174541	0.668659
MER4_13q32.3b	51.3656	48.0373	56.393	47.6221	-0.29724	0.174859	0.668896
HERVL_Xq22.3b	222.331	250.171	207.446	122.176	-0.254058	0.175088	0.668896
HERVL_5q14.3b	55.1245	97.8032	52.8587	112.638	0.434613	0.17518	0.668896
HERV4_8q21.13b	18.5964	19.0285	23.877	23.4814	-0.261593	0.175494	0.668896
HML2_1p31.1	30.0147	52.3328	30.0248	82.1224	0.376103	0.175526	0.668896
HERV9_13q34	14.7086	20.7271	10.6605	11.9352	0.249363	0.175535	0.668896
HERVP71A_3p26.1	88.6699	83.8016	112.82	124.905	-0.308536	0.17642	0.671597
HML1_19p13.2	19.5132	26.7291	24.1716	25.0452	-0.263361	0.176556	0.671597
MER4_Xq21.31e	10.4765	66.6284	3.87291	14.5319	0.224239	0.177525	0.673969
HERVL40_19q13.42	8.41106	18.0312	6.38334	12.2304	0.232538	0.177537	0.673969
HERVW_12p13.31b	27.734	92.0595	10.1905	19.1706	0.29411	0.177978	0.673969
HERVE_19p13.2	1348.97	1206.47	1440.18	784.215	-0.202392	0.178095	0.673969
HERVH_21q21.1b	261.585	1758.6	54.1906	252.997	0.398738	0.178279	0.673969
ERVLE_18p11.21b	6.64527	11.9365	5.62847	10.1401	0.227924	0.17845	0.673969
ERV316A3_6q14.3e	9.49718	29.3202	12.5979	22.335	-0.267062	0.178615	0.673969
HERVL18_17q24.3	10.4999	51.8542	10.6826	73.0408	0.247794	0.178718	0.673969
LTR25_2q24.2	137.29	724.617	52.3397	135.154	0.437317	0.178736	0.673969
HERVH_9q33.1d	15.9647	43.3767	10.5751	32.7784	0.301907	0.178744	0.673969
PRIMA4_1p13.3	5.53888	13.5546	5.15014	12.4466	0.227665	0.179136	0.674446
ERVLE_10p15.1c	38.7406	156.657	67.1245	440.767	0.359296	0.179184	0.674446
HERVH_7q22.1a	62.4322	52.6155	52.8076	67.3793	0.26882	0.179544	0.675212
HERVH_7q35a	100.138	389.223	139.025	519.289	-0.504355	0.179719	0.675279
HERVH_5q23.2d	25.9619	148.354	96.667	843.383	0.292852	0.180148	0.676299
HERVW_4p14	8.52152	31.9369	5.51988	13.3613	0.239259	0.180437	0.676299
HERVW_7q31.1a	3.91263	12.0387	6.98956	13.2976	-0.224464	0.180462	0.676299
ERVLE_14q21.2a	11.5292	16.8355	9.56582	15.2207	0.272443	0.181246	0.676646
ERVLE_16q23.3	84.7863	72.5519	66.5365	53.0318	0.268894	0.181334	0.676646
HERVH_6q16.3b	2.40275	7.58006	9.45949	54.7403	0.202497	0.181364	0.676646
ERVLB4_8q23.1d	15.8116	20.1645	19.3115	20.27	-0.260907	0.181397	0.676646
HERVK14C_13q31.1	5.48139	18.7697	4.90695	24.3693	0.218805	0.181605	0.676646
HERVIP10F_2q11.2	20.5592	99.8161	10.1475	39.8397	0.289042	0.18164	0.676646
PABLA_Xp22.2	30.5136	27.9928	37.0448	33.2727	-0.262534	0.181957	0.676646
MER34B_9q22.31b	44.5776	41.2517	38.5286	29.2847	0.239464	0.18203	0.676646
ERVLE_19p13.2c	14.3762	15.4753	17.1095	14.8313	-0.234211	0.182104	0.676646
HERVFRD_Xq22.1	46.8945	40.0679	38.6063	34.4138	0.262135	0.182371	0.676646
ERVLE_12p13.2b	7.72766	8.56398	7.89857	10.5238	0.205642	0.182378	0.676646
HML3_19q13.41a	54.2158	58.0325	55.5323	44.8939	-0.262369	0.182703	0.676646
ERV316A3_3q22.2b	10.8622	22.6203	15.1521	22.3734	-0.274619	0.182705	0.676646
HERVH_2p22.3e	6.4931	16.3736	5.86789	14.8443	0.232073	0.182814	0.676646
HERVL_22q11.22a	8.22151	55.3188	2.60346	8.31942	0.214594	0.182942	0.676646
ERVLE_1p13.2a	119.363	145.867	123.436	96.0691	-0.237585	0.183068	0.676646
PRIMA41_8q24.3	138.807	300.57	130.338	252.335	-0.354092	0.183416	0.67735
MER4_9q31.3b	18.9181	36.1193	26.9074	42.1489	-0.341626	0.183709	0.677849
HERVH_20q12b	12.308	35.9474	15.0551	65.1415	0.286365	0.183993	0.678318
HERVH_4p16.3a	10.5892	27.1483	6.93973	12.0705	0.238145	0.184292	0.67884
ERV316A3_6p22.1k	41.4789	50.3108	48.3675	54.0227	-0.310198	0.18477	0.679607
HERVL_4q31.1	286.815	145.65	317.528	151.591	-0.141024	0.184894	0.679607
HML5_8p23.2c	6.16475	19.8056	5.56722	19.1387	0.230857	0.185119	0.679607
PABLA_1q25.1	372.689	434.851	368.31	287.955	-0.30983	0.185132	0.679607
MER101_12q24.13a	30.7028	34.0098	25.899	34.1187	0.273218	0.185441	0.68016
MER41_22q12.3c	14.3138	22.5517	16.3663	20.1044	-0.26302	0.185656	0.680369
HERVH_6q12c	124.175	263.034	96.0049	250.918	0.499805	0.186068	0.680718
ERVLE_12q23.2a	3.87669	6.42569	6.35747	7.96152	-0.194221	0.186117	0.680718
HERVH_10q25.1c	22.9558	69.0325	20.1858	117.964	0.318758	0.186375	0.680718
LTR25_11q24.3b	20.9178	49.6977	14.0286	29.6915	0.305138	0.186571	0.680718
HERVK11_1q32.3	89.2422	101.964	68.1934	63.0863	0.274806	0.186594	0.680718
HERVH_14q23.1b	8.20907	16.4329	31.8967	195.757	-0.267919	0.186699	0.680718
MER61_2p24.2	18.6228	26.862	15.8756	21.9173	0.276631	0.186991	0.680742
ERVLB4_Xp21.1d	5.38053	8.82959	4.94638	8.51854	0.199708	0.187183	0.680742
HERVL_1q42.13	141.117	177.143	94.2191	80.7605	0.283518	0.187432	0.680742
HERVIP10FH_8q24.13b	28.4469	64.2996	17.2319	23.1187	0.299048	0.187647	0.680742
ERVLE_1p35.1a	10.8512	22.78	15.5251	29.2039	-0.251966	0.187666	0.680742
MER101_7q22.1b	104.969	86.617	85.8974	65.9334	0.236695	0.187727	0.680742
HERVH_21q21.3b	13.8628	32.9659	12.4681	29.085	0.286218	0.187813	0.680742
ERVLB4_7q36.3c	6.42918	22.4703	3.93408	10.0818	0.216093	0.188606	0.682739
HERVL_11q22.3g	22.7076	108.294	13.5358	29.5772	0.301809	0.18894	0.682739
HERVP71A_10q11.22	70.2963	87.9145	58.3683	90.626	0.330605	0.189288	0.682739
MER34B_10q25.3a	26.2534	29.7671	21.5262	30.3616	0.280595	0.189298	0.682739
HERVK11D_15q24.3	7.48219	11.3237	6.83898	12.2214	0.224741	0.189311	0.682739
HERVL18_3p21.31b	115.485	281.028	134.105	197.686	-0.418412	0.189315	0.682739
HERVW_3q26.32	12.801	17.6059	15.2404	13.9091	-0.254195	0.189479	0.682757
ERV316A3_5p14.1e	27.358	72.0749	13.9727	35.5483	0.331129	0.189688	0.682939
MER4B_7q33b	11.0855	20.1119	9.21057	23.5986	0.265714	0.190015	0.683545
ERV316A3_12q14.1e	30.0274	20.2764	28.5548	27.4642	0.22593	0.190309	0.683547
ERVLE_4q25b	3.23178	7.8204	13.6031	108.483	0.204044	0.190333	0.683547
HERVH_11q24.2b	24.5922	37.9418	18.854	29.3316	0.334985	0.190551	0.683759
ERV316A3_4q13.3d	11.6459	17.9058	19.7501	34.0628	-0.288146	0.191053	0.68442
ERVLE_7p21.3f	15.9836	28.6202	13.5266	32.0536	0.294007	0.191053	0.68442
MER4_1p12a	1241.26	2958.02	1571.42	3937.02	-0.621856	0.191383	0.684781
HERVH_6p22.3e	44.0035	217.907	8.16775	28.0285	0.297097	0.191675	0.684781
MER101_4q23	11.9591	10.2189	11.3342	11.4841	0.218443	0.191907	0.684781
HERVIP10F_19p13.11	140.858	118.679	192.974	258.269	-0.237208	0.191976	0.684781
HERVL_10q25.1d	32.8542	118.715	24.1193	179.388	0.321112	0.192105	0.684781
LTR25_6q21	16.5781	18.1572	14.826	17.5427	0.259211	0.192108	0.684781
MER61_6q13b	47.8657	125.975	71.0712	165.227	-0.393809	0.192312	0.684943
HERVH_4p16.1d	22.72	35.4347	38.6423	106.048	-0.305617	0.19249	0.685008
HERVL_1p31.1d	31.656	61.4998	33.1299	43.7402	-0.317059	0.193043	0.685872
ERVLB4_16p13.3a	1126.45	946.641	880.605	639.798	0.210833	0.193159	0.685872
HERVH_Xq13.2c	92.1884	75.0719	100.171	66.7621	-0.234889	0.19321	0.685872
HERVH48_8q24.13	115.453	99.6345	129.113	109.986	-0.246485	0.193425	0.68607
HERVE_5q14.3b	15.4499	58.7678	9.02324	21.3071	0.281205	0.193771	0.686732
HARLEQUIN_5p12b	4.82626	22.4643	5.43565	29.8566	0.197736	0.194168	0.687573
ERV316A3_2q37.1a	645.719	405.412	773.977	561.689	-0.216638	0.194444	0.687642
HML1_19q13.41a	18.066	22.9355	14.0185	16.3038	0.253385	0.19467	0.687642
MER4B_Xq11.1a	8.55463	13.7019	6.87122	11.1018	0.226052	0.194868	0.687642
MER4B_Xp11.4c	6.09879	8.70733	5.56794	8.28957	0.191403	0.195189	0.687642
PABLB_Xp21.1a	15.1924	28.7178	10.5613	17.8739	0.289663	0.195444	0.687642
HERVL74_7p21.3	15.9225	39.8552	10.7071	24.4997	0.269906	0.195541	0.687642
HERVW_10q23.33	5.36311	9.34643	6.21447	14.6502	0.21923	0.195553	0.687642
ERV316A3_10q26.12	46.885	99.3911	73.0369	218.944	-0.366465	0.195781	0.687642
HERVH_10q23.31d	156.158	475.893	52.3477	176.209	0.45687	0.195853	0.687642
HERVFH21_11p15.4	423.853	423.017	473.114	473.514	-0.219229	0.196017	0.687642
HERVH_11q25a	17.5888	58.7022	24.0701	56.8077	-0.32	0.196155	0.687642
HML2_17p13.1	81.3141	159.377	126.943	247.276	-0.417584	0.196186	0.687642
HML6_3p25.1	170.71	507.214	165.804	417.438	-0.277558	0.196264	0.687642
ERV316A3_8q21.13e	6.56187	13.3885	8.78493	11.9934	-0.216981	0.196573	0.688166
HERVI_8p23.1	28.3708	36.6429	30.8259	27.3289	-0.272442	0.197052	0.689233
HERVIP10FH_5q32	39.6953	351.141	1.55498	4.14374	0.210074	0.197351	0.689233
HUERSP2_12p12.3	9.36899	16.0872	21.2274	100.254	0.267236	0.197358	0.689233
HERVH_Xq21.31d	4.26836	20.7781	7.61079	53.7396	0.196359	0.197672	0.689769
HML3_1q24.2	6.93315	11.6565	9.23035	11.0732	-0.220947	0.19833	0.691074
ERVLE_7p15.3c	6.62928	9.85882	5.47532	8.19154	0.211268	0.198367	0.691074
ERVLB4_8q21.13b	9.98996	15.246	7.64828	10.6925	0.234802	0.199025	0.691596
HERVIP10F_1p36.21	12.6349	94.1318	9.91348	60.7951	0.223447	0.199095	0.691596
HERVL_3q26.1d	1.35976	5.61038	12.6605	109.659	0.173298	0.199151	0.691596
MER4_Yq11.221e	29.0025	39.3431	24.7293	37.0504	0.358714	0.199159	0.691596
HERVH_17q11.2	7.69127	10.2528	6.25787	7.63051	0.209581	0.19979	0.692532
HERVH_9p13.3d	23.3463	26.4826	23.6611	22.2388	-0.245608	0.200057	0.692532
ERV316A3_1q21.2	36.3064	41.6188	48.8672	98.4262	-0.228578	0.200072	0.692532
HERVK11_22q11.21	27.6147	26.7594	36.815	37.5917	-0.258471	0.200072	0.692532
HML4_4q13.3	133.068	769.817	42.7763	218.545	0.393784	0.20063	0.692901
HERVS71_19p12b	3.18479	25.4111	9.35312	61.1485	-0.198777	0.200767	0.692901
HERVL32_7q31.1	16.3136	18.6405	20.6766	26.3147	-0.244103	0.201084	0.692901
ERVLE_2q31.1b	21.0128	19.7665	25.6735	22.9131	-0.247486	0.201159	0.692901
HERVL_6q14.1d	21.4265	21.7718	27.145	36.5312	-0.243274	0.201214	0.692901
ERVLE_9p13.3b	6.32672	14.1304	4.70616	7.76013	0.212759	0.20123	0.692901
HUERSP3B_7p13	27.1585	23.741	31.403	24.018	-0.230448	0.201502	0.692901
MER61_18q21.2b	15.5364	15.9065	13.4532	15.9497	0.23951	0.201576	0.692901
HML3_1p33	8.62493	18.6927	14.8569	25.1897	-0.257246	0.201627	0.692901
HERVP71A_1q44b	107.56	125.109	136.137	152.413	-0.293988	0.201909	0.693299
HUERSP3B_Xp11.22	1532.44	1069.03	1806.08	1362.69	-0.229977	0.202221	0.693299
HERVH_8q21.2a	17.2337	85.7809	9.26199	27.1902	0.25948	0.202226	0.693299
MER41_12q21.31a	9.52585	73.3186	2.05791	5.37838	0.187882	0.202949	0.695225
HERVH_2p14c	45.8243	98.2477	49.7637	100.364	-0.383795	0.203457	0.696411
HERVH_8q24.21a	121.583	694.728	67.778	142.492	-0.36931	0.203757	0.696883
ERV316A3_9q34.2a	6.93544	12.5639	8.60283	10.6646	-0.213338	0.204011	0.697048
MER101_21q21.3c	14.1953	20.6186	11.5297	21.7329	0.274559	0.204165	0.697048
ERVLB4_8q13.2	18.7118	26.4651	19.3847	49.1058	0.308592	0.204444	0.697048
HERVL_12q23.3b	36.337	71.0214	48.0383	68.7971	-0.33757	0.20487	0.697048
LTR25_7q21.12	134.523	103	163.993	140.967	-0.24417	0.205219	0.697048
HERVEA_18q21.2	92.1855	66.5725	73.3014	49.302	0.24489	0.205294	0.697048
HERVH_4q35.1a	29987.7	62545.1	23801.1	55301.6	0.906066	0.205386	0.697048
HERVH48_1q44a	6.27334	15.3192	4.18597	7.64207	0.210798	0.205483	0.697048
LTR19_Yp11.2d	33.8327	56.9844	28.9305	59.038	0.384632	0.205862	0.697048
HERVFH21_8q11.21	56.3183	93.8409	105.524	214.681	-0.392938	0.205976	0.697048
HERVH_9p24.2c	5.39801	10.5792	6.09198	18.2587	0.214913	0.206281	0.697048
HERVIP10F_15q14	28.199	29.5281	36.06	130.226	0.270647	0.206299	0.697048
HERVH_3p12.3c	16.484	33.3268	15.3431	42.0036	0.291905	0.20637	0.697048
MER4_11p15.4a	118.89	87.7467	110.475	133.313	0.213055	0.20643	0.697048
HERVL74_3q13.2a	34.6586	41.7127	31.5475	40.3977	0.319604	0.206485	0.697048
HERVH_9q34.3	19.3476	60.8026	14.0763	34.3031	0.269865	0.206607	0.697048
ERVLE_8q21.13a	21.681	27.2246	15.9997	19.0398	0.266829	0.206611	0.697048
HERVFRD_8q12.1b	6.18981	26.6124	10.4804	25.9907	-0.246817	0.206718	0.697048
HERVH_Yq11.222c	15.6368	31.6654	15.3579	40.57	0.306053	0.206931	0.697218
ERVLE_4q22.3a	50.0205	40.7096	52.525	32.8147	-0.215413	0.207527	0.698678
ERV316A3_7p12.1a	9.28805	16.3348	6.93794	11.667	0.230583	0.207779	0.698983
HERVE_2p13.3a	85.7908	91.5268	79.0538	156.189	0.350698	0.207972	0.699085
HERVH_14q32.2c	9.65927	27.1697	6.01429	13.741	0.233888	0.209042	0.701441
HERVH48_4q13.2b	11.6711	24.9198	72.6892	579.345	0.298233	0.209192	0.701441
MER101_8p21.3	15.6134	14.9468	20.4871	20.3401	-0.231675	0.209233	0.701441
HUERSP3_6p21.32	242.507	736.186	882.454	4410.08	-0.392103	0.209375	0.701441
ERVLE_7q31.32f	3.68831	9.754	7.92259	23.8522	-0.206141	0.209632	0.701441
ERV316A3_15q26.2c	9.7496	22.2387	13.1274	22.5645	-0.252071	0.20965	0.701441
HERVL40_20q11.22	730.629	1043.17	508.323	662.249	0.325155	0.20997	0.701963
HERV9_8q23.1	4.99552	10.0869	5.83037	23.6687	0.206268	0.21035	0.702016
PABLB_14q11.2a	11.9731	19.0077	54.3043	315.391	-0.291064	0.210412	0.702016
HARLEQUIN_Xq24	5.50915	12.2228	11.797	28.828	-0.243617	0.210474	0.702016
HERVFC1_11p15.4	123.834	569.732	37.649	104.497	0.400089	0.211167	0.703434
MER41_7q33	30.0978	32.6532	35.2554	35.8571	-0.262866	0.211465	0.703434
ERVLE_3p21.31g	10.3317	14.0915	12.5369	14.2523	-0.223851	0.211733	0.703434
ERV316A3_14q12d	21.0596	23.9485	17.1793	20.8927	0.267362	0.211744	0.703434
HERVL18_3p21.31a	159.264	366.878	183.09	584.019	-0.386747	0.211837	0.703434
HERV30_4q13.2d	27.9953	220.878	5.30178	32.6686	0.230627	0.212095	0.703434
HERVFH21_1p34.3	182.078	235.737	187.763	140.447	-0.21672	0.212286	0.703434
HERVH48_Xq13.3	4.47377	12.634	5.76424	25.6147	0.19563	0.212352	0.703434
ERVLE_20q13.12b	64.9018	44.7118	59.4794	46.2448	0.206175	0.21237	0.703434
ERV316A3_22q12.3a	98.4829	175.547	184.482	366.724	-0.514803	0.213135	0.704208
ERVLE_1q42.2d	5.97669	15.5719	5.35872	12.5987	0.201995	0.213141	0.704208
ERVLE_3p24.3a	17.6461	110.728	2.35264	4.44144	0.20793	0.213213	0.704208
HERVL40_Xp11.23b	7.40462	9.49452	6.28847	7.48246	0.193548	0.213258	0.704208
MER61_8q11.23a	15.6429	24.9505	25.0492	37.6014	-0.298093	0.213836	0.705578
HERVH_11q13.2f	16.1804	107.634	6.19553	38.449	0.212302	0.214737	0.706861
HERVL_10q11.21c	12.0424	29.2064	12.9032	19.0156	-0.248024	0.214794	0.706861
HUERSP3_3q29	53.4253	144.134	28.1432	44.8125	0.328976	0.215166	0.706861
ERV316A3_3q25.2b	33.7601	80.533	19.8966	38.8103	0.344032	0.215505	0.706861
ERVLE_12q21.33	104.755	66.4989	114.677	67.9011	-0.191507	0.215702	0.706861
HUERSP3B_11q14.1	6.28383	16.9837	11.7424	25.631	-0.239495	0.215895	0.706861
PABLB_12p11.21	23.9073	26.2901	18.0419	18.2317	0.263559	0.216019	0.706861
HARLEQUIN_3q22.1b	10.6608	34.7096	6.60117	15.5193	0.226736	0.216092	0.706861
MER101_2q35a	599.42	702.115	627.055	594.328	-0.238909	0.216252	0.706861
MER4_Xq25a	3.43791	7.01596	8.35107	16.1658	-0.206114	0.216534	0.706861
MER61_1p34.1b	240.491	198.069	272.904	195.653	-0.225862	0.216571	0.706861
MER61_12q23.3	7.16952	25.0365	153.467	994.905	-0.298537	0.216742	0.706861
HERVL_6p21.33b	40.6698	99.7134	56.2898	118.114	-0.345164	0.216819	0.706861
HERV3_4q13.3a	18.5384	70.5147	34.2042	98.5009	-0.310013	0.217182	0.706861
HERVW_Xp22.31	7.75126	14.2317	5.80422	9.26629	0.20715	0.217293	0.706861
MER4_Xq21.33a	8.97428	24.9877	15.9706	35.147	-0.272017	0.21759	0.706861
HERVL_1p22.3	4.13052	8.32115	15.2511	74.6455	-0.225362	0.217788	0.706861
HERVH48_Xp11.21	697.195	452.677	769.614	380.986	-0.164582	0.218138	0.706861
HERVL_17p13.2b	5.59964	9.53564	8.49007	10.5797	-0.198872	0.218356	0.706861
MER34B_14q21.2	14.5269	51.4426	7.76242	25.2927	0.255254	0.218358	0.706861
HERV4_4p16.3	9.81572	14.2947	8.5206	12.7479	0.213229	0.218396	0.706861
HERVE_13q14.13b	76.9678	99.9011	84.1783	60.0053	-0.254615	0.21869	0.706861
ERVLB4_1q23.3c	11.0408	17.7249	7.73555	11.0728	0.228327	0.218708	0.706861
HERVL_6q16.1a	16.4602	34.3298	12.029	19.9724	0.27271	0.218773	0.706861
PABLA_2p25.1	348.081	256.597	333.703	383.029	0.23792	0.218857	0.706861
MER61_7p13	28.8605	34.9681	35.3506	38.9522	-0.261216	0.219002	0.706861
MER4_5q35.2c	14.7789	28.8937	15.4105	51.3353	0.283536	0.219079	0.706861
HERVL_5q14.3c	6.46461	15.7315	4.87202	10.3463	0.226591	0.21914	0.706861
HARLEQUIN_13q12.12	286.536	918.163	449.726	2125.76	-0.534176	0.219385	0.706861
HERVL_1p34.2	7.36325	21.4886	4.68311	8.75016	0.193858	0.219445	0.706861
HERVS71_6p22.1	6.4392	22.2594	5.9554	19.0907	0.221604	0.219736	0.706861
HERVIP10F_8p23.2	6.51825	28.2163	4.13959	11.7231	0.202838	0.219757	0.706861
LTR25_Xq21.1a	6.46722	12.6415	9.85081	16.5025	-0.225292	0.219762	0.706861
ERVLE_1q32.1b	10.5999	13.8668	19.0912	35.8005	-0.241175	0.219806	0.706861
MER61_10p13	27.2343	35.8391	31.6892	36.4589	-0.268955	0.221497	0.71094
ERVLE_8q24.3i	61.0251	107.376	41.5382	64.408	0.310815	0.221573	0.71094
HERVH_12q14.1a	273.198	1049.17	99.1422	463.372	0.49195	0.221595	0.71094
MER4_3q13.2a	41.12	258.176	11.4218	32.384	0.279587	0.221822	0.71094
HERVH_4p15.33d	5.1564	10.8414	10.6506	21.7849	-0.237235	0.2219	0.71094
ERV316A3_18q11.2c	409.568	537.961	352.071	458.376	0.314675	0.222139	0.711175
ERVLE_5q12.3a	14.6397	13.832	24.6987	29.4198	-0.254458	0.223261	0.714235
HERVS71_3q21.2	95.3223	101.538	123.832	154.191	-0.299771	0.224267	0.716923
MER101_21q21.3b	7.97824	15.0178	8.89578	23.5598	0.228974	0.224454	0.716988
HERVEA_4q22.1	118.272	218.694	252.427	1168.39	-0.405239	0.225074	0.718434
HUERSP3_12p13.31	4.281	11.4855	9.02273	19.7813	-0.206843	0.225464	0.718857
MER4_12p12.2a	130.337	1067.08	11.5085	27.4382	0.309546	0.22554	0.718857
HUERSP1_15q24.2	8.62303	12.1564	10.907	12.0218	-0.210538	0.22573	0.71892
HERVL_12q13.3	13.8939	21.3296	16.9432	19.6467	-0.238223	0.225894	0.71892
HARLEQUIN_6p25.2	21.4867	20.4476	24.9592	20.387	-0.236467	0.226685	0.719136
ERVLE_17q21.31	52.3032	77.1593	40.8952	64.6175	0.333106	0.226744	0.719136
HERVH48_5q11.2	6.23182	22.7655	4.17542	16.1535	0.196006	0.226775	0.719136
MER41_3p12.2	6.26828	12.2456	4.85493	8.19373	0.196995	0.226794	0.719136
PRIMA4_2p13.1	6.74342	14.1035	10.1161	15.9426	-0.215829	0.226963	0.719136
HERVH_1q41a	32.359	85.4722	37.0633	171.198	0.336276	0.227319	0.719136
MER4_2q14.1a	24.5711	24.4221	23.8107	41.9349	0.247671	0.227562	0.719136
HERVL_4q24d	13.0665	17.1967	16.1201	17.1393	-0.219423	0.227971	0.719136
HERVW_Xp11.3	13.6242	43.6946	8.11511	18.3504	0.251094	0.228218	0.719136
ERV316A3_6p22.1a	11.8005	21.0686	13.9498	17.6465	-0.238059	0.228277	0.719136
HERVH_6p21.32	48.3371	121.666	59.966	101.208	-0.348495	0.228457	0.719136
ERV316A3_6p25.1e	6.50997	14.6238	15.118	52.477	-0.228387	0.228539	0.719136
HERVL18_7q21.11a	27.7693	82.882	16.6415	30.262	0.313437	0.228699	0.719136
HERVEA_1q41	16.3326	132.39	4.40452	19.0211	0.203123	0.228798	0.719136
HERV30_3q25.2	9.04068	23.4144	5.04123	9.51265	0.217138	0.228827	0.719136
HERVE_4q33	7.93714	14.7801	17.2231	102.654	0.223332	0.229198	0.719136
HERVH_14q11.2a	243.275	525.599	295.717	527.8	-0.332519	0.22925	0.719136
MER61_1p22.2b	13.9971	19.2137	29.8327	102.267	-0.26535	0.229281	0.719136
ERV316A3_5q12.1a	6.71104	13.3797	5.69509	12.761	0.200632	0.229306	0.719136
MER4B_3q21.2	967.469	794.601	1125.21	1190.43	-0.206357	0.229328	0.719136
HERVIP10FH_4p15.33	14.0558	64.981	4.08173	9.9911	0.228633	0.229469	0.719136
MER4_15q21.2a	62.2717	65.1874	49.0414	49.4844	0.321183	0.229864	0.719322
HML3_5p15.33d	1446.68	1306.97	1608.42	1407.98	-0.213891	0.23005	0.719322
MER34B_14q24.1	4.02714	8.38099	5.97328	8.02896	-0.167334	0.230085	0.719322
HERVH_11p15.4b	26.7147	52.726	32.202	51.5098	-0.323595	0.230251	0.719322
HERVH_10p14a	26.1513	103.576	12.0798	24.8113	0.283059	0.230364	0.719322
MER101_3q13.11b	12.6463	32.4566	9.03574	23.0882	0.246697	0.231072	0.721012
HERVIP10F_19q13.41b	7.43962	14.9466	5.69022	10.2239	0.211408	0.231322	0.721269
HERVH_1p34.2a	112.743	69.3683	131.243	85.9928	-0.181043	0.231535	0.72141
HERVH_4q21.3	8.87494	13.6003	7.56258	11.5627	0.213715	0.232331	0.722505
HARLEQUIN_17q25.3b	16.4333	24.2998	14.222	21.4415	0.251658	0.232375	0.722505
MER61_7p14.3a	7.73752	20.8516	11.3914	21.5323	-0.225443	0.232535	0.722505
ERV316A3_17q12d	157.731	128.181	174.258	143.658	-0.20707	0.232701	0.722505
MER41_Xq22.3	12.9038	31.9364	7.35768	11.9986	0.235853	0.232836	0.722505
HERVL_1q21.1a	10.4407	26.0296	8.89375	21.8841	0.249818	0.233065	0.722505
HERVH_2p12d	37.8501	54.3224	46.1846	58.4627	-0.354862	0.233099	0.722505
HARLEQUIN_6q23.1	23.3437	35.8752	20.3961	31.0196	0.285909	0.233229	0.722505
HERVL_10p13b	37.968	36.8219	32.3818	27.1058	0.239584	0.233804	0.723767
HERVH_Xq23a	148.906	1271.81	1618.52	13949.9	-0.395954	0.234256	0.724426
HERVH_7q34c	26.0184	25.195	30.6129	23.9119	-0.226579	0.234547	0.724426
HERVEA_15q21.3	251.373	378.13	455.526	1873.98	-0.326491	0.234747	0.724426
HERVH_12p13.31c	7.79593	20.2387	11.5469	62.4547	0.222927	0.235334	0.724426
PABLA_Xq21.31b	27.9876	81.9937	56.9013	144.08	-0.356621	0.235675	0.724426
HERVIP10F_6q15	7.20346	10.204	10.8542	13.3271	-0.20579	0.235877	0.724426
ERV316A3_5p14.1c	3.34071	7.8581	8.42388	18.6429	-0.201598	0.235882	0.724426
HERVH_9q22.33c	12.7131	35.9432	8.95082	22.1279	0.240444	0.23596	0.724426
LTR19_Yq11.221d	3.49064	12.3688	8.42468	55.5752	0.194318	0.235997	0.724426
ERV316A3_2q22.3c	84.6522	470.883	34.8951	101.458	0.361582	0.236091	0.724426
HERVH_12p12.1a	5.4489	37.9809	6.53757	48.5666	0.18629	0.236628	0.724426
HERVFRD_4q32.3	9.75583	15.5984	7.98828	12.1378	0.229169	0.236881	0.724426
ERVLE_18q11.2a	8.17096	13.5224	6.03235	8.65567	0.203881	0.236902	0.724426
HERVH_3q21.3c	23.1537	50.4046	34.172	139.674	-0.258264	0.236923	0.724426
HERVH_9q33.3b	41.6224	36.4058	35.9385	34.3552	0.228877	0.236992	0.724426
LTR19_Yq11.221c	8.47289	24.171	6.18004	21.2151	0.219572	0.237017	0.724426
HERVH_9q22.33a	39.7401	98.6107	30.8731	87.1306	0.345866	0.237041	0.724426
HERVH_10q24.2a	18.0873	21.0175	14.2519	14.5083	0.217107	0.237201	0.724426
ERVLE_1p34.2c	16.6675	48.6165	18.5094	33.1189	-0.273942	0.237356	0.724426
PRIMA41_22q11.23	167.315	164.792	204.809	212.761	-0.363867	0.237525	0.724426
ERVLE_4p12e	10.5926	19.873	15.1095	24.6611	-0.235718	0.237601	0.724426
ERV316A3_6p22.1m	20.1999	24.8133	28.9965	41.5275	-0.265586	0.237853	0.724426
HERVIP10FH_1p33a	11.7123	12.6841	15.4047	19.1664	-0.20852	0.237886	0.724426
ERV316A3_2q14.1e	19.1494	36.9073	18.9617	37.4121	0.304341	0.238244	0.724556
ERVLE_6q21c	22.2774	17.9971	27.4162	21.3113	-0.195249	0.238276	0.724556
ERV316A3_21q21.2g	18.1633	20.0075	15.9412	21.652	0.247239	0.238434	0.724556
HERVH_13q13.3a	164.713	136.676	204.373	205.118	-0.290826	0.239707	0.727912
ERV316A3_13q32.1a	15.3785	17.02	14.8572	17.6041	0.234941	0.240491	0.7293
MER61_4q28.3a	12.0386	29.6628	9.49434	26.094	0.237764	0.240602	0.7293
ERVLE_5p15.31a	8.57494	20.9524	11.0753	17.9939	-0.224532	0.241008	0.7293
HERVH_8q22.1b	26.0487	112.304	32.5217	100.81	-0.293177	0.241229	0.7293
HERVK11_11p15.2	11.0956	32.0072	11.6457	46.1	0.241787	0.241397	0.7293
HML6_17q21.31	9.29162	13.8591	7.9855	11.6971	0.20862	0.241459	0.7293
ERVLE_19q13.31c	35.1221	68.0105	34.2545	44.5735	-0.283597	0.241533	0.7293
HERVW_2p23.1a	25.3241	28.5708	19.1814	16.3066	0.218684	0.241622	0.7293
ERV316A3_5p15.31	46.2387	42.4943	39.1046	33.117	0.241755	0.241688	0.7293
HERVH_8q22.3a	27.4746	29.7167	36.8938	44.8862	-0.267979	0.241944	0.729558
HERVH_19p13.2b	203.961	164.659	231.897	178.817	-0.199381	0.242354	0.730285
ERVLB4_12p13.2c	63.0608	49.0268	52.8694	42.7877	0.219556	0.243604	0.733111
HUERSP1_3p21.31	43.3699	33.8371	36.5436	28.6527	0.215182	0.243657	0.733111
MER41_3p22.1c	13.992	21.7844	14.1361	24.8296	0.237467	0.243923	0.733111
HERVH_12p11.22a	27.3459	66.4788	43.7681	128.904	-0.288077	0.243973	0.733111
HERVH_15q26.3b	1548.06	1101.45	1679.19	1060.25	-0.177434	0.244337	0.733356
ERV316A3_1q42.12b	342.682	446.688	402.874	584.876	-0.310185	0.244395	0.733356
PRIMA4_10p12.1	386.081	218.647	434.683	240.079	-0.139503	0.244729	0.733789
MER4_Xq21.31f	26.1197	72.431	16.6634	32.3646	0.303118	0.24488	0.733789
HERV3_1q42.13	7.5914	13.0305	6.68125	11.084	0.204728	0.245066	0.733836
HERVH_Xp11.21	16.9443	24.9138	12.7246	15.1931	0.220321	0.245313	0.733998
HERVL_3p24.3c	31.8764	42.0741	26.7297	33.2875	0.297556	0.245462	0.733998
HERVE_20p11.21b	14684.8	18071.6	10776.2	11217	0.269237	0.245804	0.734513
HERVIP10FH_10q23.33	147.129	910.264	63.1601	484.556	0.304424	0.246718	0.736251
HERVH_3p11.1b	600.928	5137.81	66.055	458.171	0.350409	0.246728	0.736251
HARLEQUIN_1q32.1	2084.44	3426.11	2184.86	3118.22	-0.337175	0.247182	0.736771
ERVLB4_1q23.1a	4.84145	13.1352	13.1272	41.5611	-0.222857	0.247244	0.736771
MER4_2q21.1a	53.9757	106.072	96.724	173.005	-0.428001	0.247731	0.73771
ERV316A3_17q24.3a	13.7001	16.7865	16.6224	16.6747	-0.214412	0.248195	0.738037
MER4_19p12a	61.1732	126.131	68.4177	107.197	-0.332847	0.249257	0.738037
ERVLE_16q12.1b	10.8695	16.881	8.583	12.2149	0.214951	0.249309	0.738037
ERVLE_7q35j	11.4773	38.355	4.50849	9.91459	0.220566	0.249374	0.738037
HUERSP1_2q21.2	32.3522	36.5743	26.6511	32.6553	0.2934	0.249604	0.738037
MER4_5p12d	216.433	167.179	181.588	124.96	0.193141	0.249727	0.738037
HERVL18_Xq24	8.731	10.506	11.8413	12.172	-0.195457	0.249741	0.738037
HML2_3p25.3	22.1725	109.598	20.4673	74.8306	-0.244081	0.249979	0.738037
HERVL18_1q32.2	54.2957	338.332	33.8616	108.476	-0.300725	0.250029	0.738037
HERV3_4q13.2a	93.3223	146.151	126.644	212.533	-0.381643	0.250038	0.738037
MER41_5q32	156.894	231.128	179.078	280.121	-0.377647	0.250099	0.738037
HML3_4q34.2	23.0258	17.7088	21.9941	21.9964	0.217099	0.250131	0.738037
MER101_5q35.2e	42.2646	51.0644	35.0183	49.705	0.295481	0.250211	0.738037
MER101_7q22.1a	116.166	98.9346	102.818	102.077	0.21369	0.25027	0.738037
HERVL_15q26.3	5.73277	10.5158	4.85196	8.65195	0.187193	0.250436	0.738037
ERVLE_5q22.2d	17.735	20.5795	13.9513	14.5876	0.226909	0.250724	0.738037
HERVW_6q14.1	9.85203	51.8003	4.61584	16.8765	0.196791	0.250862	0.738037
HERVW_11p14.3a	20.5951	99.4238	7.0398	21.1815	0.245987	0.250926	0.738037
HERVEA_Yq11.221d	118.681	506.725	97.4745	292.252	0.44142	0.252221	0.741274
ERVLB4_19q13.42a	2.66213	5.88169	8.4009	56.1886	0.179331	0.25237	0.741274
HERVH_18q11.2	24.4019	75.2741	21.7502	21.5026	-0.248412	0.252741	0.741857
HERVL_5q33.3	46.8699	114.85	41.2159	32.4626	-0.236543	0.25309	0.742123
HERVH_10p12.1c	100.474	713.748	17.4852	28.6254	0.285875	0.253279	0.742123
ERVLE_6q14.1g	6.76792	13.5426	6.02522	13.229	0.202073	0.253372	0.742123
HERVW_6p23	24.9529	33.3554	22.2719	29.8928	0.2682	0.253521	0.742123
ERVLB4_Xq21.1j	7.62049	16.7705	6.01654	16.1987	0.203291	0.25399	0.742499
HERVH_4p15.33a	5.22012	12.4217	5.06766	10.2129	0.18674	0.253996	0.742499
PABLB_20p11.1	8.62322	9.99182	8.34939	11.0721	0.192598	0.254167	0.742499
HUERSP3B_5q33.3	6.36185	9.20083	5.77142	8.62862	0.183698	0.254494	0.742845
ERVLE_2p14b	81.4074	93.0721	104.997	122.999	-0.283944	0.254659	0.742845
MER41_Xp22.2	49.7453	219.492	36.4675	139.128	0.273215	0.254803	0.742845
ERVLE_11q22.1d	8.51394	13.644	7.28114	11.1647	0.20231	0.255511	0.74438
PRIMA41_10p15.3	33.8292	58.9624	19.1597	26.1382	0.283164	0.255676	0.74438
HERV9_8p11.21	11.096	59.3571	83.5161	563.573	0.24123	0.256071	0.744703
HML2_7q34	22.7642	25.2212	28.2111	25.7746	-0.224767	0.256132	0.744703
HERVH_6q22.31c	68.6489	245.465	44.0407	170.8	0.353098	0.256364	0.744874
ERVLE_19q13.42	117.684	334.33	64.3964	174.14	0.337968	0.256967	0.745623
HERVL_3q21.2	76.6989	72.8075	78.5497	137.717	0.23427	0.257028	0.745623
ERVLB4_12p13.31b	79.7723	88.5327	95.0668	99.4178	-0.24819	0.257235	0.745623
HERVH_12p12.1b	8.65853	21.4813	10.6071	15.1585	-0.204184	0.257314	0.745623
ERVLE_15q23f	6.33626	16.2309	5.83031	12.5182	0.19861	0.25767	0.745895
MER4_Xq24d	29.9587	20.5914	35.0617	23.398	-0.178591	0.257771	0.745895
HERVL_4q13.1e	4.42043	14.9191	6.79901	33.3515	0.197973	0.257928	0.745895
ERVLE_21p11.2	155.113	130.298	126.471	105.739	0.226701	0.258404	0.746057
ERV316A3_13q31.1d	69.7519	317.619	32.8261	105.216	0.356085	0.258501	0.746057
ERVLE_11q14.2c	73.4351	109.405	48.5021	42.9785	0.275791	0.258555	0.746057
HERVK11_4q13.2	1.34168	4.589	12.8487	65.2288	-0.180782	0.258677	0.746057
HERVI_14q11.2	13.5429	35.5023	15.8228	60.0238	0.260145	0.259302	0.746916
MER4B_12p12.1a	27.2824	65.1297	18.6475	31.3981	0.256066	0.259454	0.746916
HERVEA_3p24.3a	34.9274	97.0397	25.714	78.7844	0.307035	0.259495	0.746916
ERVLE_3q29a	9.52456	24.8172	14.6168	32.8335	-0.224135	0.259817	0.746974
MER34B_3p14.1	32.3215	26.2258	27.5569	20.9852	0.214146	0.260219	0.746974
HERVH_Xq25a	19.7478	139.461	8.42885	64.2186	0.19227	0.260341	0.746974
HML3_9p13.3	12.3843	17.1405	11.1347	15.9423	0.214274	0.26041	0.746974
HERVH_3q13.11	388.705	1760.76	206.077	791.651	0.474027	0.260418	0.746974
MER41_3q26.1a	24.1274	32.35	29.6883	35.3068	-0.254689	0.260719	0.746974
HERVL_6q21c	6.33078	11.8411	5.66245	10.7857	0.192569	0.260881	0.746974
ERVLE_1p31.3g	3.96208	7.64604	6.11942	9.58407	-0.170142	0.261019	0.746974
HERV3_1q23.3	125.471	80.8136	154.629	125.901	-0.186371	0.261237	0.746974
HERVH_5q23.2a	1026.52	1636.26	992.305	1617.06	-0.465851	0.261418	0.746974
ERVLE_15q25.3a	15.9672	17.1598	18.7692	16.9438	-0.209332	0.261491	0.746974
MER41_1q21.3a	53.1656	37.9152	62.5559	74.9846	-0.20261	0.261597	0.746974
HERVH_12q15a	25.8926	37.764	45.6996	261.022	0.280484	0.262006	0.747645
MER61_11q13.4	28.1716	38.1113	75.6479	416.382	-0.285118	0.262779	0.748728
MER41_3q13.13	41.8969	114.361	29.3583	87.306	0.324091	0.263032	0.748728
HERVFH21_1p36.31	26.7516	47.3197	35.169	53.6222	-0.252539	0.263068	0.748728
HERVH_2p16.1a	586.569	1352.51	338.349	647.855	0.424041	0.263081	0.748728
ERV316A3_9q34.3d	12.0176	16.9045	10.0812	13.5802	0.213024	0.263425	0.749116
HERVH_2p12g	0.919429	2.9857	58.0999	524.714	0.163685	0.263625	0.749116
ERV316A3_3q27.3e	92.9932	96.6227	127.13	183.471	-0.297208	0.263777	0.749116
ERVL_6q23.3b	8.41757	14.1268	16.0345	50.3169	-0.229638	0.264215	0.749116
HERVH_18q22.3b	214.528	278.154	247.228	217.117	-0.218294	0.264267	0.749116
LTR19_10p15.1	9.12073	20.3837	7.88274	18.741	0.213843	0.26437	0.749116
HERVS71_14q32.33	144.279	904.75	18.1091	55.0576	0.2947	0.264435	0.749116
MER4_7p12.2	12.2862	55.7045	11.8436	76.1353	0.222929	0.264897	0.749933
HERVL_18p11.32c	8.48404	22.947	23.6879	61.2914	-0.262834	0.265542	0.750876
HERVP71A_6p21.1b	12.3976	18.9885	18.0281	26.1754	-0.235919	0.265579	0.750876
HML3_17p13.1	128.034	168.184	137.449	112.265	-0.195893	0.266295	0.751405
HERVH_9q21.33a	4.42694	11.2601	5.99366	25.9182	0.182758	0.266371	0.751405
HERVH_11q24.1a	52.3698	404.955	7.83503	15.2948	0.227962	0.266679	0.751405
HERVH_6q24.2	4350.91	13735.8	2932.7	6655.46	-0.685057	0.26671	0.751405
MER4B_4q13.2a	3.81812	19.837	32.849	197.969	-0.222882	0.266829	0.751405
ERVLE_11p11.2a	14.5378	14.2171	13.7969	21.7944	0.20073	0.266895	0.751405
HERVH_3q21.3a	30.9416	51.7778	36.7996	39.7981	-0.275831	0.267257	0.751405
HERVL_9p21.3a	34.382	41.8114	35.5188	36.0553	-0.273724	0.267487	0.751405
HERVH_3q28d	19.7616	105.917	11.7448	38.6565	0.234909	0.267512	0.751405
HML5_Xq21.33	6.14388	12.5434	15.0434	39.6057	-0.224999	0.267581	0.751405
HERVL_12q13.13	66.2439	72.9868	52.1782	53.6054	0.274319	0.267686	0.751405
HERV9_5q15	11.1908	18.0369	10.089	18.7686	0.205601	0.268177	0.751858
LTR25_1q22	143.718	169.888	121.216	134.018	0.237928	0.268196	0.751858
HERVH_18q12.2a	45.1944	65.5326	48.1912	82.6593	0.349678	0.268928	0.753418
MER4_5p14.3b	113.001	182.447	78.57	114.432	0.372023	0.269179	0.753633
HERVH_6q23.1	33.5559	51.1618	35.006	37.922	-0.27036	0.270061	0.75549
HERVFRD_Xq21.1b	67.1861	82.1518	93.3126	149.119	-0.3578	0.27035	0.75549
HARLEQUIN_5q31.2	282.013	858.633	265.937	977.963	0.455558	0.270369	0.75549
MER41_3p14.3a	23.5135	70.8705	21.6769	109.948	0.261669	0.271026	0.756834
ERVLE_17q21.2b	18.1886	46.9368	13.5595	41.3076	0.245622	0.27224	0.758355
LTR19_Yp11.2a	16.9595	26.591	22.2636	28.5411	-0.276394	0.272256	0.758355
HERV3_Yp11.2c	14.5811	34.0526	17.2641	56.1543	0.261128	0.272402	0.758355
HUERSP1_15q26.1a	22.1095	41.7829	17.3125	31.5528	0.290497	0.27246	0.758355
MER4B_19q13.42a	107.016	114.613	111.424	106.985	-0.283912	0.272958	0.758355
ERVLE_20q13.33a	10.916	36.6186	9.75496	40.6074	0.210037	0.272967	0.758355
ERVLE_7q21.3a	11.4761	14.1041	9.80431	10.9349	0.197547	0.273083	0.758355
HERVFH19_Xp11.3b	7.03145	14.4925	12.1922	25.4536	-0.219867	0.273212	0.758355
LTR25_14q24.2	47.8036	48.9624	52.7174	52.5643	-0.210671	0.27332	0.758355
MER41_1q44b	13.758	16.3253	15.6033	14.5671	-0.195365	0.273332	0.758355
LTR25_12p11.22b	18.6781	39.5997	28.6451	80.6381	-0.253968	0.273508	0.758355
HERV3_4p14	4.61494	7.41555	7.09203	10.2926	-0.174729	0.273786	0.758638
HERVKC4_1q22	188.249	131.285	169.127	140.362	0.182064	0.274552	0.759135
HERVH_1p11.2	5.80725	11.9802	7.94391	11.0517	-0.198322	0.274721	0.759135
HERVH_2p22.3d	127.377	1000.16	18.8838	81.614	0.25937	0.274792	0.759135
HERVFRD_12q24.33	17.3805	28.3926	13.087	20.228	0.247346	0.274865	0.759135
HERVH_10q24.1	49.0427	193.328	18.9237	64.377	0.292699	0.274977	0.759135
ERVLE_7q21.2	35.5791	37.1156	39.3615	29.666	-0.208556	0.275042	0.759135
ERVLB4_Xq21.33c	24.2192	46.3291	31.216	46.2797	-0.286148	0.2752	0.759135
ERVL_4q31.22	9.01003	72.9101	1.88184	5.94397	0.15748	0.275584	0.759502
HERVH_4q32.3d	1035.51	7447.87	329.998	1328	0.428309	0.275855	0.759502
ERV316A3_3p25.2a	46.8264	35.28	51.9426	35.8467	-0.199863	0.276035	0.759502
ERV316A3_3q26.31	7.20285	12.714	6.06462	9.78087	0.186149	0.276038	0.759502
HERVL40_1q44	157.479	127.539	176.144	138.886	-0.180272	0.276794	0.761094
MER41_8q12.1a	89.3394	70.4764	72.2539	50.4184	0.180272	0.277052	0.761317
HERVL74_6q16.1	5.56834	11.7006	5.8596	17.798	0.181886	0.27738	0.761732
HERV9_Yq11.221d	312.504	484.038	264.786	381.931	0.527578	0.277909	0.7627
HERV9_16q21	11.4653	36.424	7.19797	16.7703	0.220943	0.278351	0.76288
HERVH_19p13.2a	87.7689	106.306	104.132	114.165	-0.267112	0.278465	0.76288
HERVL40_6q16.1c	17.4041	26.9115	14.2411	23.6856	0.262426	0.278506	0.76288
ERV316A3_1p36.13	6.72261	20.8177	5.70562	15.3094	0.193246	0.278929	0.763554
HML2_19q13.41b	10.5439	15.9286	15.6925	25.7577	-0.222877	0.279718	0.764268
LTR23_1p22.1	19.1204	31.5327	22.04	27.3316	-0.221456	0.279751	0.764268
HML1_1q23.3	3.96665	9.67831	14.1173	42.3709	-0.201194	0.280054	0.764268
HERVH_1q25.3	1120.55	3413.39	333.262	1118.81	0.532391	0.280121	0.764268
HERVH_7q21.3b	220.093	224.846	164.535	151.609	0.305944	0.280507	0.764268
ERVLB4_17q21.32	326.11	314.957	329.871	239.485	-0.204003	0.280764	0.764268
HARLEQUIN_4q13.3	9.29496	28.7583	8.34151	29.5144	0.205774	0.280843	0.764268
HERVL_5q23.2a	6.00986	13.1732	4.47613	6.91407	0.171493	0.280938	0.764268
ERVL_5q11.2	51.2463	70.5908	50.1645	48.137	-0.250794	0.281093	0.764268
HERVKC4_6p22.1	28.1858	36.8521	46.312	68.774	-0.274668	0.281151	0.764268
HERVH_2p16.1c	602.805	1495.71	408.019	864.138	0.382711	0.281401	0.764268
ERVLE_5q35.1b	17.7826	49.8432	22.1579	43.639	-0.27493	0.282158	0.764268
HERVK11_1q23.3a	13.9099	24.6265	21.1434	32.1052	-0.246251	0.282501	0.764268
HERVH_3p22.1a	12.2743	67.654	4.56634	11.4876	0.199119	0.282675	0.764268
PRIMA41_17q21.31b	292.47	203.879	253.343	201.263	0.166014	0.282691	0.764268
HERVL40_7q21.12a	5.5663	9.08704	8.02024	11.1868	-0.176786	0.282824	0.764268
ERV316A3_15q21.3c	6.51199	11.8175	6.05669	13.0793	0.189348	0.282913	0.764268
HERVW_14q23.1	7.64982	12.673	6.78858	11.1104	0.191628	0.282951	0.764268
MER4_17q21.2b	18.6921	61.3061	99.4196	834.398	0.250534	0.282976	0.764268
ERV316A3_12q21.33e	12.8413	36.6245	7.81855	17.0377	0.228424	0.282989	0.764268
MER41_Xp11.23	9.27025	14.5379	14.7204	28.5571	-0.20022	0.283154	0.764268
HERVH_22q12.3a	930.624	2591.7	384.506	742.426	0.405611	0.283309	0.764268
ERV316A3_2p22.3g	4.84483	22.0321	5.72434	29.4037	0.180676	0.283319	0.764268
HERVL40_13q32.1	6.03023	9.72441	5.646	8.817	0.169588	0.283575	0.764268
MER4_1p13.2b	6.44722	11.9005	6.13373	9.86784	0.17438	0.283628	0.764268
HERVH_12p13.2c	10.2775	19.2214	15.6476	30.1212	-0.224724	0.283909	0.764549
ERVL_6q16.3a	5.43834	7.29783	5.31783	7.45838	0.159786	0.284446	0.765515
HERVH_19q13.41a	516.216	503.766	404.012	284.344	0.209479	0.284759	0.765534
MER41_3q27.1	33.4244	49.7113	46.1205	114.451	-0.248142	0.284808	0.765534
HARLEQUIN_21q22.3a	197.509	488.842	139.312	115.986	0.187262	0.285212	0.76614
HERVH48_11p15.4	11.945	16.1683	28.4329	140.429	-0.214759	0.285456	0.766317
ERVLE_3q13.33c	6.24129	21.1163	4.37856	13.9349	0.182573	0.286216	0.767065
HERVW_11q14.1	88.4122	67.2521	100.114	67.5764	-0.188	0.286432	0.767065
ERVLB4_18q22.2	3.73474	7.39356	6.28435	11.1925	-0.175349	0.286613	0.767065
MER61_5p14.1	155.955	410.673	80.0572	236.27	0.39968	0.286624	0.767065
HML6_19q13.41e	392.004	498.138	259.389	270.999	0.304573	0.286625	0.767065
HARLEQUIN_5q23.1	14.6404	32.4559	17.3686	24.3827	-0.221818	0.286912	0.767355
ERVLE_7q31.32b	15.8584	23.6485	19.045	22.7419	-0.219679	0.287541	0.767715
HERVIP10F_3q29	40.5528	46.36	37.0213	59.2633	0.238696	0.287958	0.767715
HERV3_6p12.2	57.1552	162.588	134.489	353.673	-0.369977	0.287993	0.767715
HUERSP3_8q23.3	11.7345	23.2607	9.21429	13.3881	0.202432	0.288027	0.767715
ERV316A3_15q24.1b	122.915	67.3528	113.047	63.4701	0.145451	0.288063	0.767715
HERVH_16p13.2a	4.57975	13.1944	9.24115	40.9018	0.189071	0.288116	0.767715
HERVH_19q13.42d	11.7263	14.6471	16.5484	19.1517	-0.203607	0.289079	0.769805
HERVH_4q28.3e	11.7562	26.1937	8.76351	20.7318	0.221075	0.289727	0.771052
HERVIP10FH_2p14	24.6385	24.2968	30.8687	28.142	-0.206946	0.28999	0.771278
HERVH_8p23.1d	13.5596	43.6196	14.331	26.9855	-0.230864	0.291311	0.774048
PRIMA41_19q13.2b	45.4229	129.214	34.5114	42.3414	-0.261778	0.291493	0.774048
ERV316A3_11p13c	32.4829	100.341	32.7474	61.7572	-0.273364	0.291571	0.774048
PRIMA4_18q23a	86.9155	109.641	93.0614	67.3201	-0.191204	0.292515	0.776075
MER101_6p12.1	461.2	261.308	409.884	218.094	0.144327	0.293314	0.77754
MER101_5p15.31a	4.66296	18.6049	6.48154	28.7163	0.17634	0.293492	0.77754
HERV9_17q11.2a	12.6893	98.2958	2.77156	8.80957	0.172522	0.293738	0.77754
PABLA_6p12.2	21.9171	69.1433	51.4819	184.172	-0.292506	0.29379	0.77754
HERVL66_19p12e	19.4126	46.1457	25.1239	128.903	0.250264	0.294516	0.778686
HERVH_12q21.32c	102.265	212.714	104.862	178.911	-0.358592	0.294584	0.778686
HERVFRD_19q13.41	102.227	366.958	29.3507	40.4734	0.336647	0.295053	0.779447
MER101_16p11.2c	12.6925	70.9069	19.1666	102.869	0.214275	0.29572	0.780731
MER4_1p21.3	398.081	327.155	449.354	468.806	-0.175462	0.29637	0.781357
HERVH_3q28a	269.338	473.31	424.754	972.851	-0.379307	0.296422	0.781357
ERVLE_3q13.2a	7.20236	13.7653	6.28748	11.2186	0.183177	0.296502	0.781357
HERVL_12p12.1b	3.93583	10.4584	11.7722	43.7464	-0.199118	0.297359	0.781489
HARLEQUIN_1q21.2	7.29285	18.2617	6.92844	17.3696	0.189683	0.297488	0.781489
ERVLE_19p13.2d	5.70142	9.77164	5.04842	7.54102	0.159469	0.297579	0.781489
MER41_8p11.21	16.5286	18.7237	20.2093	21.4291	-0.196752	0.297609	0.781489
HERVH_4p15.31b	6.38599	20.4003	6.15473	22.6641	0.176909	0.297759	0.781489
HERVH_14q21.3a	6.6923	36.1729	4.89675	20.1031	0.165352	0.297836	0.781489
HERVH_5q21.1b	727.085	4830.59	56.3492	322.881	0.332424	0.297925	0.781489
PABLB_10p15.1a	127.933	272.157	111.107	178.429	-0.309421	0.298004	0.781489
ERV316A3_11p15.3	12.658	20.7846	9.68236	14.9582	0.197178	0.298215	0.781566
ERVLE_1p31.1k	4.24309	9.21724	13.507	44.7718	-0.197681	0.29861	0.781694
ERV316A3_5q35.3d	22.6922	20.3121	19.2256	16.9914	0.186608	0.298627	0.781694
HERVH_5q35.1b	20.1085	71.309	17.3363	29.9969	-0.216993	0.299068	0.782063
MER4_1p34.3a	9.40193	15.0385	12.9634	22.8514	-0.192402	0.299162	0.782063
MER4_Xq28b	8.6093	42.8632	5.2239	15.896	0.174374	0.299552	0.782063
ERVLE_4q24h	5.25394	7.54224	7.98691	9.85044	-0.167307	0.299652	0.782063
HERVS71_19q13.12b	662.622	567.751	604.887	509.026	0.175683	0.299676	0.782063
MER4_8q24.3c	57.8057	49.2583	69.5517	57.4017	-0.207187	0.300017	0.78221
ERV316A3_8q21.13d	7.36548	9.41891	7.10193	9.76872	0.163533	0.300319	0.78221
ERVLB4_22q13.31b	79.7809	45.0521	92.7962	60.5407	-0.155577	0.300469	0.78221
HERVH_9q21.33b	5.20211	13.3606	7.59821	10.774	-0.169238	0.300918	0.78221
ERVLB4_4q35.2a	7.64625	23.2915	5.5562	17.2451	0.19819	0.301036	0.78221
HERV3_14q24.2	28.8893	32.4746	27.7125	31.1049	0.213256	0.301106	0.78221
MER61_17q22b	21.539	83.2352	15.6098	41.8704	0.252516	0.301673	0.78221
HERVL18_2q31.1	51.1276	231.651	32.6681	64.8228	-0.246324	0.301758	0.78221
MER4B_21q22.3	8.94031	19.671	8.26664	17.3633	0.189848	0.301792	0.78221
HERVE_8p23.1a	2.00415	8.33607	12.4814	99.1975	0.156255	0.301896	0.78221
HERVL18_5q21.2	35.157	43.8432	42.2107	37.7592	-0.25084	0.301978	0.78221
HERVK11D_Yp11.2	5.82478	13.928	22.2785	169.77	0.204073	0.302039	0.78221
MER41_5p12	27.9419	43.7554	33.789	41.4918	-0.23256	0.302319	0.78221
ERV316A3_8q22.1d	12.1356	19.0703	10.7097	21.27	0.205796	0.303188	0.78221
HERVL74_14q12	10.2336	13.2203	10.0028	13.8964	0.188348	0.303236	0.78221
HML3_5p15.33b	330.112	234.967	402.596	300.407	-0.167118	0.303349	0.78221
HML1_5p14.1	6.04058	11.3312	6.04033	12.3658	0.187922	0.303569	0.78221
ERVLE_3q24b	5.87601	14.3189	4.50654	9.99892	0.174778	0.303856	0.78221
HERVH_14q24.2c	8.36924	12.4544	10.5978	12.3905	-0.181376	0.303867	0.78221
ERVLB4_Xq28b	30.1015	24.5212	27.1195	23.1022	0.187879	0.304167	0.78221
HERVH_6q22.31h	27.6103	133.613	10.3446	26.7114	0.23577	0.304185	0.78221
HML3_4q34.1a	18.2769	86.8714	21.523	80.8838	-0.230335	0.304691	0.78221
HERVH_2p13.3b	6.80726	15.1066	6.85967	20.7361	0.185986	0.304728	0.78221
PABLA_1q24.2	230.781	158.157	247.201	142.821	-0.143318	0.304882	0.78221
HERV9_6p24.3	5.79402	13.4623	5.03687	13.2697	0.172274	0.304948	0.78221
HERVH_4q28.1d	8.97274	31.083	11.8747	64.0164	0.202804	0.304951	0.78221
HERVH_5q34e	5.41053	19.65	6.78156	28.3517	0.184248	0.305075	0.78221
HERVH_3p14.3a	851.108	3188.09	3024.47	13653.8	-0.563	0.305086	0.78221
ERVL_12p13.2	29.5685	28.3698	22.5538	18.5564	0.199984	0.305436	0.78221
HERVIP10FH_6q26b	144.878	1049.34	33.4263	120.938	0.292884	0.305442	0.78221
HERVIP10FH_Yq11.222b	21.8512	38.8578	17.722	30.266	0.2609	0.305565	0.78221
MER34B_4q31.3	236.201	225.532	252.014	212.353	-0.218348	0.305596	0.78221
ERVLE_5q33.3	31.8384	25.4492	32.1487	40.8529	0.196681	0.305727	0.78221
ERVLE_7q32.3a	4.90276	6.9757	7.02484	7.83022	-0.147452	0.305939	0.782288
HARLEQUIN_2q34	9.91963	18.2794	6.87732	7.67089	0.169396	0.306167	0.782408
ERVLB4_8p21.1b	44.5466	68.0097	49.0169	42.5505	-0.23079	0.306541	0.782899
HUERSP2_17q12	5.01419	15.0829	11.6118	35.1606	-0.194332	0.306925	0.783241
ERV316A3_2q35e	66.3738	46.6491	64.939	48.149	0.174264	0.307039	0.783241
HML3_19q13.31	97.1043	130.359	83.7091	106.721	0.230598	0.307419	0.783745
LTR19_Yq11.223a	22.1987	42.0626	23.0277	50.2309	0.257438	0.308189	0.784894
ERV316A3_8q23.3e	3.71303	8.00594	32.9429	283.802	0.176031	0.308395	0.784894
HERVH_1p13.1a	54.1921	474.506	4.11603	14.5005	0.182499	0.308416	0.784894
HERVH_19p13.3c	88.879	305.072	43.7318	145.771	0.277353	0.308926	0.785606
HERVH_9q21.33e	10.3416	86.2659	8.79492	71.5672	0.15707	0.309061	0.785606
ERVLE_6q23.3b	4.68514	12.3344	5.80853	23.9064	0.168367	0.30946	0.785832
ERV316A3_8q24.12c	22.7791	29.5148	35.2462	77.6724	-0.2259	0.309691	0.785832
HERVW_6q24.2a	4.96734	8.20853	6.11963	17.0071	0.166019	0.309697	0.785832
HML6_8p21.3	21.0807	22.3962	22.3964	17.8927	-0.19393	0.310235	0.786732
HERVL18_11q14.2b	43.6128	97.1475	82.853	200.736	-0.31389	0.311541	0.788498
HERVI_12q24.32	1.65645	4.49837	9.48587	76.3171	0.14566	0.311619	0.788498
ERVLE_4q21.1b	44.6173	40.504	50.3191	51.5142	-0.222138	0.311639	0.788498
MER4_7p21.1	7.04212	13.7898	6.70477	13.4676	0.184534	0.31169	0.788498
HERVI_7p15.3	23.9588	20.4098	19.8128	15.9933	0.188098	0.311875	0.788498
HERVIP10FH_3p21.31	2.90936	5.85284	8.3302	20.3574	-0.170211	0.31203	0.788498
ERVL_1q41	8.47638	13.9174	7.29337	11.7691	0.174573	0.31426	0.792654
ERV316A3_3q26.1e	5.44429	9.92968	8.5864	13.355	-0.173101	0.314338	0.792654
HERVK11_2q34a	60.4378	51.5314	66.0771	50.5834	-0.195448	0.31441	0.792654
HERVH_Xq13.1b	46.3317	45.0334	52.3622	53.9539	-0.199474	0.314412	0.792654
MER61_12q14.2	34.0426	34.7333	34.5254	41.9647	0.204365	0.315161	0.792654
HARLEQUIN_7p15.3	90.6976	62.4547	106.911	236.97	0.195132	0.315361	0.792654
HERVH_21q21.1e	30.3618	105.113	29.1781	50.8449	-0.277956	0.315526	0.792654
HML4_3q26.2	13.6082	46.3591	27.5738	87.031	-0.24338	0.315897	0.792654
HERVS71_3p12.3	6.75582	10.6251	11.1608	18.0213	-0.177436	0.315948	0.792654
MER4_3q25.1b	6.21921	19.2663	4.33032	8.49914	0.161066	0.315984	0.792654
ERVLE_7q36.2d	21.7818	85.4733	31.644	200.217	0.247439	0.316128	0.792654
HML6_12p11.21	12.1918	15.0336	12.1308	18.6426	0.183916	0.316205	0.792654
HERVH_6q15	46.6705	310.585	51.464	318.295	0.269004	0.3163	0.792654
HERVE_2p13.3b	31.2388	45.4879	25.2092	44.1371	0.261309	0.316443	0.792654
HERV9_6q13	6.38151	16.7897	4.83107	10.0171	0.172405	0.316478	0.792654
HERVH_15q26.1c	28.9868	47.6118	20.2392	25.8298	0.227811	0.316924	0.792654
MER34B_7q11.23d	95.4085	74.4017	84.871	61.1999	0.186516	0.317006	0.792654
HERVIP10F_2q21.2	14.4558	47.3529	19.78	73.2694	-0.219945	0.317068	0.792654
HERVFH19_Xq13.1	49.2459	34.302	57.3869	38.1344	-0.159008	0.317172	0.792654
ERVLE_9p21.3a	6.37876	12.0766	8.71705	12.952	-0.174427	0.317605	0.793128
MER41_7q22.3a	112.458	317.47	111.825	385.374	0.360031	0.317953	0.793128
HERVL40_18q12.2	32.1226	24.9221	35.1424	24.1225	-0.165572	0.318018	0.793128
HUERSP1_11p14.1	5.58503	8.9301	5.35484	8.60016	0.149905	0.318188	0.793128
HERVW_12q14.1	8.30783	13.605	27.364	105.272	-0.211472	0.318285	0.793128
HERVL18_1p31.3a	127.188	360.216	198.054	447.008	-0.370559	0.318467	0.793128
HERVEA_4p15.1	286.621	601.517	356.729	1009.28	-0.402198	0.319474	0.794759
ERV316A3_6p22.1f	9.44695	13.887	11.1135	13.084	-0.181188	0.319665	0.794759
HERV9_4q13.3	29.0036	92.636	55.9758	165.007	-0.284651	0.319682	0.794759
ERV316A3_5q12.1b	9.81776	11.2789	12.851	13.4022	-0.166265	0.320082	0.794759
LTR25_3q21.3	6.05752	16.4256	6.32136	22.0309	0.170654	0.320198	0.794759
HERV9_11q22.3	46.3877	124.727	67.3286	134.654	-0.293924	0.320229	0.794759
HERVH_6q22.1b	68.6408	615.75	2.0754	5.76136	0.163242	0.320419	0.794772
MER4B_12q22	57.2169	92.637	55.9576	65.0739	-0.252743	0.320976	0.795107
ERV316A3_1p34.1b	5.87538	10.953	5.3296	8.21338	0.154314	0.321102	0.795107
ERVLE_10p11.22b	15.2682	16.9808	17.1694	15.3867	-0.178962	0.321108	0.795107
ERVLE_8q22.3b	72.5974	69.7801	80.3557	58.4308	-0.207245	0.32197	0.796437
HARLEQUIN_8p21.2	17.4352	59.6157	8.83394	18.6709	0.200454	0.322303	0.796437
HML2_4p16.3b	11.4341	21.7457	10.6262	22.4994	0.207082	0.322514	0.796437
ERVLE_12p13.2a	26.5286	34.23	19.3271	19.7382	0.201959	0.322711	0.796437
MER61_21q22.11	8.43544	10.8796	7.3818	8.5716	0.163948	0.32275	0.796437
HML5_12q21.32	83.013	66.0254	102.994	83.31	-0.1961	0.322817	0.796437
HERVL_4q23c	4.9513	8.51892	5.5484	11.4309	0.158284	0.322993	0.796437
ERVLB4_8p12b	8.46911	15.2101	9.975	11.0368	-0.16912	0.323125	0.796437
MER41_4p15.2	200.811	135.898	190.564	146.723	0.160579	0.323474	0.796842
ERVLE_11q21c	6.36346	12.1059	5.99518	11.3099	0.176363	0.323822	0.797242
ERVLE_2q24.2a	28.2321	102.463	15.1452	20.0497	0.223341	0.324663	0.798857
HUERSP3_10q23.33a	8.75955	15.146	8.14077	15.9814	0.176047	0.325235	0.799806
HERVH_3q26.2c	13.1541	32.2814	12.1364	35.2815	0.204872	0.325644	0.800354
MER41_22q12.3e	703.841	646.767	741.557	574.909	-0.164176	0.32599	0.80075
HML5_11q12.2	4.96238	14.3936	11.6185	39.0346	-0.182114	0.32622	0.800858
ERVLE_14q24.3	6.25446	9.495	6.03528	8.51944	0.153548	0.326492	0.801069
HERVH_3p12.3d	10.3853	19.4315	9.97706	19.9301	0.203482	0.326813	0.801399
HERVL74_19p13.2a	108.554	89.2691	120.218	78.4644	-0.200453	0.327285	0.8018
MER4_6q26d	12.0006	42.5773	17.6182	125.774	0.197989	0.327349	0.8018
ERV316A3_11q13.2	6.3195	25.1493	3.96687	9.65907	0.156581	0.328119	0.802697
HERVL18_1p12	106.728	344.233	53.6761	96.4643	0.258098	0.328247	0.802697
MER41_4q28.1	9.73517	17.4728	12.8242	16.4521	-0.182512	0.328274	0.802697
HML3_19p13.2d	24.477	30.1879	17.9206	16.4868	0.202782	0.329193	0.804487
HERVFH21_7p21.3	237.054	2118.55	260.781	2360.75	0.226986	0.329574	0.804631
ERVLE_4q23d	23.1929	57.9425	17.4645	43.8233	0.231147	0.329626	0.804631
HERVH_1p34.3c	74.0187	353.28	48.1843	73.3255	-0.217111	0.33017	0.805001
HML3_16p13.13	55.1246	45.0994	65.187	56.8507	-0.191553	0.330541	0.805001
ERVLE_1p36.11d	11.4893	43.8749	10.9735	14.8766	-0.185435	0.330645	0.805001
ERVLE_11p15.4f	17.38	27.0675	16.2247	23.05	0.206127	0.330674	0.805001
ERVLE_19q13.31a	135.386	316.462	1864.11	14004.4	-0.403874	0.330712	0.805001
HERV3_3q21.3	945.455	3258.1	1835.63	9126.97	-0.261394	0.331186	0.805699
ERVLE_7p15.3b	5.77434	9.21651	5.83479	10.6709	0.154517	0.331606	0.806266
HERV4_5q22.2	14.3512	23.8153	15.7764	38.6416	0.21941	0.332172	0.807185
HERVFRD_8q12.1d	14.8603	46.3881	34.1159	93.7121	-0.252794	0.332665	0.807493
HERVL40_2p24.2	10.7256	20.053	10.5388	24.4175	0.203894	0.332674	0.807493
ERVLE_13q14.13	309.403	335.69	313.948	177.288	-0.147494	0.333101	0.807896
PABLA_7q21.13	19.7632	21.8899	24.9831	25.5947	-0.194402	0.333215	0.807896
HERVL18_7q21.11b	6.62431	21.5462	8.45441	40.4479	0.178917	0.334206	0.808295
HERVI_22q11.1a	4.81643	13.2324	6.07407	18.3958	0.167025	0.334322	0.808295
HERV4_20q13.33b	64.8079	99.8334	102.845	197.687	-0.284896	0.334643	0.808295
HERVH_19q13.32c	7.66933	22.3401	4.74922	9.76608	0.175803	0.334887	0.808295
HERVL_1q32.1	24.5005	86.0585	21.5585	34.3827	-0.216792	0.335046	0.808295
ERVLB4_15q21.1c	7.14988	46.6516	9.8473	68.0646	0.149924	0.335155	0.808295
MER101_5p13.2b	8.53809	11.9736	12.559	16.1865	-0.175742	0.335278	0.808295
HERVW_15q21.3	202.65	136.312	184.41	134.342	0.12689	0.335356	0.808295
HERVH_4p15.2b	686.015	4449.93	225.13	1064.06	0.40885	0.335401	0.808295
HERVH_1q42.13c	61.1422	344.358	29.8912	37.3849	-0.258478	0.335411	0.808295
HARLEQUIN_10q24.2	33.0755	49.4994	35.0377	40.5874	-0.24233	0.335444	0.808295
ERVLE_1q21.3b	15.7189	25.4471	12.5787	19.5939	0.204643	0.336335	0.809989
HERVH_1q41f	1125.37	4682.45	133.383	470.769	0.39242	0.337009	0.810839
MER41_6p22.3	796.825	886.212	594.963	728.09	0.223616	0.337065	0.810839
MER4_6q25.2a	11.3689	56.3834	21.7315	69.9634	-0.212781	0.338631	0.811702
ERVLE_3q27.1a	8.75776	37.9466	5.21234	8.71508	0.156344	0.338679	0.811702
HUERSP3B_12q12	20.8532	70.6228	8.45372	26.7212	0.213035	0.338744	0.811702
HML5_9q31.1	8.47536	11.6811	8.66938	12.2027	0.165046	0.339036	0.811702
MER4_14q12b	44.4295	131.725	35.7402	112.51	-0.247199	0.339058	0.811702
HERVH48_2q22.2	277.369	631.804	355.995	1039.2	-0.285653	0.339314	0.811702
HERVFRD_6p24.2	106.196	252.712	129.334	228.13	-0.254884	0.339319	0.811702
HERV9_Yp11.2a	16.3723	42.4721	20.5039	75.7281	0.234701	0.33941	0.811702
HUERSP2_3q21.3	48.8715	68.7146	64.3158	69.2127	-0.254225	0.339519	0.811702
HERVE_8p23.1j	9.94891	41.1337	24.1782	122.258	-0.210407	0.339631	0.811702
HERVIP10FH_Xq27.1	6.17384	9.77244	5.2548	7.44667	0.147255	0.339832	0.811702
ERV316A3_20q13.33b	347.59	334.918	392.414	332.637	-0.180336	0.339927	0.811702
MER41_4p15.31	9.36545	24.5018	14.323	25.7313	-0.203935	0.340078	0.811702
HERV4_2q31.1	21.8663	23.0144	19.7408	22.6056	0.178017	0.340209	0.811702
HUERSP3B_3q23	122.685	115.691	138.795	144.351	-0.182161	0.340524	0.811702
HERV3_14q32.33	133.786	161.374	134.896	131.312	-0.220885	0.34053	0.811702
ERVLB4_1p34.2a	8.59181	10.6895	11.1482	11.3453	-0.158805	0.34142	0.811702
ERV316A3_9q34.2b	32.3499	30.005	39.2196	40.8479	-0.212574	0.341488	0.811702
ERVLE_22q13.31e	46.1284	57.9533	49.5714	45.808	-0.255558	0.34159	0.811702
HERV3_9q34.13	21.6336	24.7048	26.733	32.594	-0.202828	0.341754	0.811702
PABLB_2q31.1	4.94545	8.78493	6.73201	8.72541	-0.150724	0.341931	0.811702
HERVL_21q21.3g	6.19025	9.95389	8.16698	23.7451	0.167138	0.341986	0.811702
MER4B_Yq11.221b	109.805	237.267	114.209	320.399	0.397114	0.342083	0.811702
ERVLB4_7q22.3	11.9304	41.2915	15.5408	33.3484	-0.212975	0.342129	0.811702
ERVLE_4q32.1j	4.44533	13.6551	6.60963	12.466	-0.163597	0.342136	0.811702
PRIMA4_14q23.1	36.3968	28.9476	33.2333	22.6679	0.171318	0.342394	0.811776
HERVL_3q25.1	56.2049	93.3596	76.9386	143.371	-0.262635	0.342545	0.811776
ERVLE_2p25.3c	13.5598	32.0436	15.8032	23.3703	-0.210466	0.342995	0.812396
HERV4_19q13.41	719.187	499.928	600.557	270.218	0.130595	0.343334	0.812726
HERVH_9q33.2b	3.70748	7.58502	7.57031	15.801	-0.154713	0.343512	0.812726
HUERSP1_12p12.1	49.4699	82.277	46.9332	80.03	0.247946	0.343771	0.812894
HERVE_5q14.3a	9.95225	30.2831	13.0071	65.414	0.198164	0.344066	0.813145
ERV316A3_7q21.11h	18.6389	162.759	2.58667	10.3938	0.139495	0.344957	0.814803
ERVLE_3q28b	99.6296	344.423	75.9788	135.027	-0.341601	0.345419	0.815007
HERVH_4p16.1b	33.204	53.5784	37.9436	58.667	-0.263767	0.345437	0.815007
HERVH_3q25.2d	23.0461	109.021	18.6973	41.9032	-0.207802	0.34573	0.815007
PABLB_2p13.1	350.122	169.418	378.245	216.062	-0.107419	0.345848	0.815007
ERVLB4_8q21.13c	579.183	611.657	595.623	567.333	-0.221669	0.346304	0.815007
HERVH_5q31.1f	9.57621	33.992	8.2101	29.1043	0.17833	0.346878	0.815007
ERV316A3_8q13.1b	7.70927	17.5967	9.80013	13.4935	-0.177547	0.346973	0.815007
MER4_4q31.3b	4.03912	5.87463	6.61968	8.718	-0.137313	0.34703	0.815007
HERVL_9q31.1a	8.43451	11.4114	7.62857	10.9905	0.154443	0.347059	0.815007
MER4B_3q25.33b	5.45185	7.15571	8.33244	9.98554	-0.150577	0.34708	0.815007
MER4_10q23.2	6.08793	14.5866	6.55703	14.9993	0.162782	0.347442	0.815007
ERVLE_22q12.3b	138.212	257.19	228.508	480.697	-0.417018	0.347749	0.815007
HERVFC1_7q36.2	878.682	3821.81	569.219	2500.99	0.446081	0.347915	0.815007
ERVLE_Xq24	6.01086	10.7812	6.36635	13.2219	0.164068	0.348036	0.815007
HERVH_1p31.3d	12835.2	30130.7	14616.5	47266.2	0.649436	0.348548	0.815007
HERVH_2p14b	1067.07	1384.57	1481.42	3071.95	-0.247587	0.348733	0.815007
HERVL_7q31.31	0.724153	3.77092	28.6921	261.182	0.121454	0.3491	0.815007
ERV316A3_10q11.21c	3.96015	11.3922	6.83121	15.0247	-0.165031	0.349159	0.815007
HERVL_3q11.2c	332.358	763.642	304.078	576.337	0.422634	0.349193	0.815007
HERVL_2q33.3	11.648	21.9063	18.73	37.0962	-0.195791	0.349273	0.815007
ERVLB4_18q11.2	4.61162	11.4627	9.25989	26.9041	-0.171587	0.349432	0.815007
MER61_10q26.12	325.129	933.414	295.947	716.573	-0.37772	0.349482	0.815007
HERVL_1q23.3a	652.292	793.141	641.237	522.271	-0.172076	0.349517	0.815007
ERVLE_12p11.21b	53.0185	40.2199	58.5488	37.8961	-0.161226	0.349586	0.815007
HERVH_3p21.31a	80.6628	56.1672	90.5627	72.1023	-0.173326	0.349885	0.815263
MER4B_14q13.1	8.51072	15.8845	8.63289	17.2062	0.178093	0.35013	0.815392
ERVL_10p14	10.8842	15.8203	9.88201	18.444	0.166341	0.350652	0.815803
HERVE_10p11.21	1669.27	1596.73	1440.89	1777.15	0.25022	0.350969	0.815803
HERVS71_4p16.1a	5.7523	11.0469	8.24477	12.6251	-0.163879	0.35106	0.815803
HERVK11_4p16.3	28.2184	51.4476	67.7135	275.609	-0.277282	0.35153	0.815803
ERVLE_13q34a	7.35985	32.4635	4.87805	14.7647	0.162408	0.351831	0.815803
HERVP71A_6p21.1a	10.9346	16.6849	16.4061	26.054	-0.196175	0.351859	0.815803
HERVW_4p16.3	10.5705	13.7696	11.2448	16.9069	0.172455	0.351882	0.815803
HERVL40_2q32.2	67.1845	68.4895	77.8061	83.2631	-0.200127	0.352177	0.815803
HERVH_5p15.2a	61.8731	281.75	49.1289	168.793	0.283454	0.352814	0.815803
ERVLE_16q23.2	3.81422	5.71692	6.37638	8.77651	-0.137206	0.352975	0.815803
ERVLE_18q11.2c	6.43362	10.5645	9.34728	14.9897	-0.156626	0.353391	0.815803
MER61_19p12c	201.253	287.169	170.235	249.354	0.334467	0.353794	0.815803
MER101_6p25.2a	7.64851	10.8631	6.55735	9.01186	0.154966	0.353875	0.815803
HERVH_19q13.42c	110.189	364.873	61.576	108.017	0.274575	0.354041	0.815803
HUERSP3_1p36.13	1652.6	1017.84	1522.26	825.256	0.114998	0.354113	0.815803
HERVH_16q21c	48.7466	74.9887	42	67.4382	0.275835	0.354174	0.815803
ERVL_2p22.1a	9.22375	11.2643	13.1405	19.1727	-0.162129	0.354451	0.815803
HERVL40_4q22.1	6.94444	18.9891	5.90873	15.1196	0.164506	0.354994	0.815803
MER61_6q14.1f	27.6458	42.2457	33.5888	44.3116	-0.220889	0.355207	0.815803
MER4_Xq24a	6.76259	15.6707	6.6617	23.8545	0.157257	0.355347	0.815803
HERVH_13q31.1b	9.27053	56.1542	10.1831	38.5938	-0.164266	0.355886	0.815803
MER4_7p11.2f	471.372	1598.45	491.58	1787.85	0.373206	0.355946	0.815803
HML5_13q12.13	38.9282	50.1045	46.6786	69.8999	-0.241734	0.356018	0.815803
HML2_22q11.23	28.552	138.957	61.717	217.425	-0.243688	0.35605	0.815803
HUERSP3B_19q13.31a	5.15782	12.9961	5.50003	18.3863	0.146566	0.356201	0.815803
MER4_1q25.1d	24.8189	54.3377	36.8774	106.909	-0.237981	0.356314	0.815803
HERVL40_9p24.1a	84.1225	64.2626	81.0517	73.1397	0.169677	0.356372	0.815803
HERVL_2q36.1a	39.0013	53.1923	37.9191	62.6153	0.217536	0.356508	0.815803
HERVW_6q15	11.0669	36.0287	8.33009	31.5172	0.187168	0.356515	0.815803
HERVL_3q26.31b	13.3907	25.8169	22.6427	84.9872	-0.188672	0.356696	0.815803
ERVLE_16p12.1b	45.7875	36.8162	50.3575	38.4912	-0.174742	0.356703	0.815803
HERVH_3q27.2	66.9279	73.101	90.189	154.9	-0.206391	0.356731	0.815803
HERVH_2p24.2	26.0138	70.5575	53.1872	165.273	-0.274251	0.35678	0.815803
MER41_12q13.11	68.228	60.3984	82.7632	76.8214	-0.179026	0.357459	0.815803
HERVFRD_10p15.1a	39.8427	46.9338	35.3329	44.961	0.221308	0.357787	0.815803
ERVL_10q21.2	16.9549	44.4915	10.1766	17.7518	0.201937	0.358234	0.815803
ERV316A3_10p11.22d	6.27519	8.20256	9.30867	11.6503	-0.155865	0.358654	0.815803
HUERSP3B_1q24.2	89.8124	81.6865	99.9569	60.7909	-0.154426	0.358766	0.815803
HUERSP3B_12q23.3b	6.218	11.6794	5.41504	10.4186	0.152418	0.358819	0.815803
ERV316A3_21q22.3c	8.27056	10.9865	15.416	32.9982	-0.177276	0.359138	0.815803
MER34B_7q11.23e	16.1484	33.1646	22.2224	38.3321	-0.232395	0.359351	0.815803
MER4B_1q24.2	5.08984	8.26059	5.13686	8.71267	0.140965	0.359352	0.815803
ERVLE_1p21.3c	91.4486	57.8548	94.7389	59.8984	-0.134702	0.359421	0.815803
HML1_19q13.43	3908.46	1750.34	3609.99	1550.26	0.092046	0.359572	0.815803
HERVH_2q23.3c	48.5356	117.007	44.3594	111.711	0.291803	0.359769	0.815803
HARLEQUIN_7q36.1	16.3689	20.6566	16.8686	16.0462	-0.163295	0.359804	0.815803
ERVLB4_1p36.11	48.6735	58.292	56.5778	88.6537	-0.224175	0.359904	0.815803
ERV316A3_10q22.3d	31.4361	43.8191	25.1861	35.5458	0.241497	0.359941	0.815803
ERVLE_6q22.31g	9.89668	13.0502	8.04926	8.06514	0.143873	0.360263	0.815803
ERVLB4_8p23.1l	6.41458	15.2842	6.30054	15.2445	0.165681	0.360281	0.815803
ERVLB4_10q22.3a	4.78549	7.16524	7.84598	10.7589	-0.147415	0.360456	0.815803
ERV316A3_3q13.31b	97.6126	135.607	107.913	127.112	-0.298931	0.360473	0.815803
MER4_2q32.2	9.89819	12.9694	12.7395	14.254	-0.165149	0.360704	0.815803
HUERSP3_10q23.33b	5.95407	12.427	6.98636	9.41846	-0.150229	0.361039	0.815803
ERVLE_17q11.1	8.07998	33.3116	10.8827	28.62	-0.178657	0.361072	0.815803
ERV316A3_16q21f	10.5308	23.2654	7.71593	14.9992	0.184078	0.361094	0.815803
ERV316A3_2q35j	22.6367	28.1472	18.9892	25.0346	0.211654	0.361574	0.815803
MER61_3q24b	6.70542	12.1344	9.67283	15.2666	-0.17284	0.361579	0.815803
HERVIP10FH_15q25.1	536.649	229.634	592.028	306.126	-0.102938	0.361626	0.815803
HERVH_3p26.3b	19.1477	139.293	5.61816	18.5099	0.167623	0.361674	0.815803
PRIMA4_1q21.1d	14.821	39.6241	9.715	26.4126	0.211359	0.361969	0.816041
HERVH_3p22.1b	40.4592	62.3556	42.3705	40.1408	-0.195108	0.362186	0.816102
HERVL_12q13.11b	4.44674	8.9627	6.54816	10.0386	-0.14782	0.3624	0.816159
HERVH_4q22.1e	10.6546	92.2395	6.16881	33.8824	0.140972	0.362909	0.816878
ERVLB4_9q21.33a	5.95636	14.4992	15.6693	51.2578	-0.186336	0.36332	0.817284
HERVH_6q23.2b	68.0815	109.914	83.3151	120.486	-0.279237	0.363469	0.817284
HARLEQUIN_7q33b	46.5354	318.585	23.8162	106.909	0.218397	0.364186	0.817744
ERVLB4_19q13.12	292.671	244.807	262.317	179.104	0.154941	0.364439	0.817744
HUERSP3B_3q26.31b	77.0823	114.792	79.5187	105.339	-0.235994	0.364579	0.817744
HERVP71A_6q14.1	13.8926	22.5546	16.8734	18.4098	-0.173462	0.365009	0.817744
MER4B_3p21.2a	6.58325	12.2509	10.1692	16.4716	-0.174094	0.365045	0.817744
HML3_19p13.2b	46.2506	97.2054	42.0105	57.6018	-0.242374	0.365125	0.817744
MER101_3q22.2	6.08306	14.7839	8.22691	15.5317	-0.164583	0.365142	0.817744
MER4B_Xq21.33	28.466	93.1477	27.6093	58.8005	-0.236174	0.365193	0.817744
HERVH_8q24.22a	19.1444	51.1072	39.8058	171.03	-0.249386	0.366347	0.818375
ERV316A3_2p25.1b	6.34796	14.1882	5.5954	10.0397	0.148768	0.366596	0.818375
MER4_12q21.1a	5.75177	9.09769	6.30402	12.6032	0.156856	0.366713	0.818375
HERVI_22q11.1b	2.88839	10.4263	33.3153	243.988	-0.175718	0.366813	0.818375
MER4_19q13.43b	8.48005	11.6043	8.20833	11.0086	0.162457	0.366923	0.818375
MER101_1q42.13a	407.275	385.758	413.337	514.058	0.227644	0.367051	0.818375
HML5_13q33.1	84.2413	51.5273	96.4946	66.4933	-0.138878	0.367065	0.818375
ERV316A3_7q36.1a	23.0628	23.1155	29.6582	30.1789	-0.200351	0.367735	0.818375
HERVIP10FH_19q13.43	708.39	428.115	818.086	502.643	-0.147975	0.367832	0.818375
ERVLB4_3q11.2f	82.5913	167.483	98.5972	167.79	-0.303384	0.367872	0.818375
HARLEQUIN_Xq23b	221.932	214.987	203.055	227.723	0.21697	0.367923	0.818375
MER4_10q11.22b	28.208	48.1761	41.0142	65.9855	-0.250786	0.367924	0.818375
HERVH_4q32.3e	9.35443	33.9788	14.6206	52.0847	0.184473	0.367958	0.818375
HERVH_7p14.3f	95.8139	231.736	110.76	263.583	-0.263339	0.368136	0.818375
HERV4_19q13.43a	827.172	426.68	754.912	378.82	0.109202	0.368797	0.819422
MER4_2q21.1e	16.1047	43.0667	24.7906	97.0008	0.223305	0.369403	0.820174
HERVIP10F_6p25.1	20.5643	159.767	7.91837	15.815	-0.166521	0.369688	0.820174
LTR46_19q13.43	74.1475	156.356	68.2717	98.4089	-0.292268	0.369707	0.820174
MER61_7p15.3	1217.13	2515.4	1025.61	2548.94	0.472621	0.369909	0.8202
HERVH_20p13b	4.6394	10.3981	6.40713	10.8455	-0.144013	0.370155	0.820221
HERVEA_Xp11.21	726.001	2450.46	323.647	503.583	0.240104	0.3703	0.820221
ERVLB4_1q24.3	14.604	42.8368	12.9838	16.966	-0.177604	0.370682	0.820647
HARLEQUIN_4q22.1a	33.0815	111.805	10.9487	22.8159	0.222674	0.370922	0.820755
HUERSP2_13q31.1c	6.59419	21.9669	39.83	241.669	0.195601	0.371297	0.820758
HERVH_20p13c	4.83775	11.8369	8.6533	47.5819	0.146016	0.371304	0.820758
ERVLE_3q26.32b	20.2404	72.6984	13.5537	40.1337	0.193569	0.371514	0.8208
HERVH_4q33b	5.19171	16.7579	8.52557	38.1403	0.15656	0.372041	0.820888
MER61_8q24.22	51.8164	256.728	35.2841	50.3024	-0.238298	0.37208	0.820888
HERVIP10FH_1p33b	13.2421	14.2989	14.9582	13.4731	-0.159972	0.372312	0.820888
MER34B_12q14.3	19.1617	17.8449	19.1848	23.3605	0.171996	0.372316	0.820888
MER4_19p12b	5.0407	22.2687	7.04203	26.22	0.149013	0.373005	0.821785
HERVH_10q24.31b	6.89261	52.2871	6.88012	54.273	0.123978	0.373308	0.821785
HUERSP3B_1q21.3	3507.84	3323.21	2942.72	2991.01	0.170591	0.373631	0.821785
ERVLB4_14q32.11a	14.0773	31.6056	19.0713	86.3833	0.20529	0.373825	0.821785
ERV316A3_4q13.1l	6.30739	10.554	12.0208	29.6486	-0.161527	0.37389	0.821785
HARLEQUIN_2q11.2a	18.6297	95.4384	8.99864	30.6671	0.187048	0.374049	0.821785
MER4_1q42.13	5.38637	14.0009	7.14742	10.8503	-0.14118	0.37438	0.821785
ERV316A3_6p25.1d	167.382	166.233	137.562	145.485	0.223723	0.374402	0.821785
ERV316A3_1p32.3b	875.478	651.524	862.312	422.738	-0.110305	0.374441	0.821785
HERVL_6q16.1b	10.2966	16.9287	10.1248	22.763	0.18311	0.375033	0.822665
HERVW_21q21.1	290.54	542.645	195.872	374.076	0.43437	0.375588	0.823464
HERVH_21q22.2	5.14574	12.2536	12.9276	77.9132	0.155852	0.376006	0.82396
HERVL_6q22.31c	26.5684	33.3009	31.351	35.1203	-0.196325	0.376262	0.824015
HERVL_9q13a	120.941	664.61	242.553	1969.25	-0.296924	0.376414	0.824015
MER4_1p34.1c	189.931	116.815	228.953	192.707	-0.119503	0.37685	0.824552
MER4B_11p14.3a	12.7402	21.7578	11.4879	19.4102	0.189215	0.377195	0.82474
HML1_14q32.32	41.7797	91.8866	26.7201	75.46	0.265688	0.377319	0.82474
PRIMA4_1q24.3	53.7939	59.6376	60.0588	55.133	-0.20159	0.378112	0.825738
ERVLE_5p15.31b	18.8399	23.7459	24.2447	34.2303	-0.190007	0.378309	0.825738
HERVFRD_8q13.2	23.9357	34.6068	24.9806	51.8041	0.215684	0.378352	0.825738
HERVL_6q22.33b	12.5449	15.4902	17.4321	23.9789	-0.173156	0.378752	0.826193
HARLEQUIN_1p35.3	72.3293	51.9451	62.7749	38.4894	0.147985	0.379038	0.826389
HERVH_9q21.33f	219.543	1126.98	69.2921	170.598	0.345337	0.379276	0.826389
ERVLE_13q12.11	19.9175	24.1492	26.1809	31.3316	-0.195155	0.379417	0.826389
HERVH_1q41c	13.9996	54.9277	6.87196	16.8045	0.176761	0.379673	0.826527
HERVFRD_14q11.2	152.647	660.974	92.7719	141.769	-0.274964	0.380222	0.827284
HERVH_1q42.2a	11430	44700.4	7336.12	21667.8	-0.600216	0.380405	0.827284
HERVH_3q24h	0.81989	3.20021	44.7947	243.528	-0.168935	0.380722	0.827556
HML6_19p13.2b	31.1018	41.3825	35.0562	46.9696	-0.17476	0.381089	0.827647
MER4_12p11.21	6.69883	10.5746	6.14505	10.618	0.13816	0.381153	0.827647
HARLEQUIN_6p21.33	1465.51	2989	1257.18	1804.56	-0.270958	0.381691	0.827647
HERVL40_22q13.2	48.411	39.9539	55.9742	47.9775	-0.168608	0.38184	0.827647
ERV316A3_1p22.3c	5.99978	9.65077	8.43599	11.4707	-0.147007	0.382509	0.827647
HERVE_17q11.2	1000.89	1297.89	892.628	830.503	0.200189	0.382562	0.827647
ERV316A3_16p12.1	21.9733	33.3473	43.6019	182.842	0.221726	0.382645	0.827647
HML5_16p11.2	37.4063	59.1094	34.3911	30.7119	-0.192094	0.382646	0.827647
ERVLE_1q42.12b	28.9423	32.3269	29.9473	24.2445	-0.173744	0.38265	0.827647
HERV3_2q14.3	20.788	27.2471	16.22	17.3887	0.174666	0.382857	0.827647
MER4_20p11.23	82.4717	165.399	55.3437	60.6203	0.197595	0.382911	0.827647
HERVH_14q12c	1228.38	4823.6	1184.13	4241.2	0.447824	0.383207	0.827647
MER4_22q12.3	22125	20091.6	20327.5	10945.2	-0.143445	0.383262	0.827647
MER4_2q24.2a	15.8959	21.4815	18.0965	41.5451	0.183609	0.383854	0.827938
HERVW_4p13	100.859	494.459	30.7003	111.816	0.257508	0.383925	0.827938
ERVLB4_20p11.21c	7.35815	10.58	7.27481	11.0237	0.153627	0.383974	0.827938
HERVL_19q13.43	238.605	163.507	208.409	113.346	0.116402	0.384612	0.828898
HUERSP3B_1p22.3	3.53297	7.51724	7.51764	16.4261	-0.137061	0.385509	0.830416
[truncated: 2,307 more rows]
