# Supplementary material for: Transcriptome Analysis of Human Endogenous Retroviruses at Locus-Specific Resolution in Non-Small Cell Lung Cancer
Source: Cancers (Basel). 2022 Sep 13;14(18):4433. doi: 10.3390/cancers14184433 (PMC9497127; doi:10.3390/cancers14184433)
Supplement: Supplementary file 1 [file cancers-14-04433-s001.zip › File_S6.xlsx]

## Sheet: LUAD
HERV	alpha-Linolenic acid metabolism	Aminoacyl-tRNA biosynthesis	AMPK signaling pathway	Apelin signaling pathway	Arachidonic acid metabolism	Arginine and proline metabolism	Autophagy - animal	B cell receptor signaling pathway	Biosynthesis of amino acids	Biosynthesis of unsaturated fatty acids	C-type lectin receptor signaling pathway	Calcium signaling pathway	cAMP signaling pathway	Carbon metabolism	Cellular senescence	cGMP-PKG signaling pathway	Chemokine signaling pathway	Cysteine and methionine metabolism	Drug metabolism - cytochrome P450	Drug metabolism - other enzymes	ECM-receptor interaction	ErbB signaling pathway	Estrogen signaling pathway	Fc epsilon RI signaling pathway	Fc gamma R-mediated phagocytosis	Ferroptosis	Focal adhesion	Gap junction	Glucagon signaling pathway	GnRH signaling pathway	HIF-1 signaling pathway	Inflammatory mediator regulation of TRP channels	Insulin signaling pathway	Linoleic acid metabolism	MAPK signaling pathway	Metabolism of xenobiotics by cytochrome P450	mTOR signaling pathway	Natural killer cell mediated cytotoxicity	One carbon pool by folate	p53 signaling pathway	Phosphatidylinositol signaling system	Phospholipase D signaling pathway	PI3K-Akt signaling pathway	Prolactin signaling pathway	Purine metabolism	Pyrimidine metabolism	Rap1 signaling pathway	Ras signaling pathway	Regulation of actin cytoskeleton
ERV316A3_10p12.2.x	0	0	0	0	-4.89766	0	0	0	0	-2.10559	0	0	0	0	0	0	-5.82774	0.529622	0	0	-3.08224	0	-4.25793	-3.49858	0	-0.530187	-6.9602	-3.28563	0	0	0	0	0	-2.49369	0	0	0	0	0	0	0	0	-4.35904	0	0	0	-6.40801	0	-7.16657
ERV316A3_10p12.2.y	0	0	0	0	-4.89766	0	0	0	0	-2.10559	0	0	0	0	0	0	-5.82774	0.529622	0	0	-3.08224	0	-4.25793	-3.49858	0	-0.530187	-6.9602	-3.28563	0	0	0	0	0	-2.49369	0	0	0	0	0	0	0	0	-4.35904	0	0	0	-6.40801	0	-7.16657
ERV316A3_10q22.1a	0	0	0	0	0	0	0	0	0	0	0	0	0	0	0	0	0	0	-4.38199	0	0	0	0	0	0	0	0	0	0	0	0	0	0	0	0	0	0	0	0	0	0	0	0	0	0	0	0	0	0
ERV316A3_10q23.33	0	0	-7.56964	-11.234	0	2.66262	-5.74739	-9.96873	0	0	-9.99883	0	-12.2989	0	-9.22561	-8.91646	-17.1817	2.35425	-2.48566	0	-3.95478	-14.7977	-17.8598	0	0	0	-14.6658	-14.2985	-6.53217	-11.6947	-8.39419	-11.6973	-10.4265	0	-16.8651	-3.13287	-9.08109	-11.8252	0	0	0	-11.6607	-15.024	-9.31554	0	0	-19.2779	-17.5155	-12.5278
ERV316A3_10q26.12	-4.87809	14.4971	-20.2963	-50.3121	0	15.1225	-28.2796	-42.3587	23.8937	-3.25861	-29.286	-33.2029	-72.9981	0	0	-45.7724	-87.1398	22.9323	-10.8103	0	0	-52.3835	-80.302	-53.0016	-39.8902	10.2509	-71.6801	-63.5586	-31.3279	-48.8805	-25.7875	-61.2518	-44.709	-3.71746	-58.7495	-8.82426	-34.4629	-72.4972	6.89974	0	-28.1153	-66.7798	-55.1385	-30.2124	0	26.8437	-99.4149	-72.4871	-52.1575
ERV316A3_11p15.4g	0	0	0	0	0	9.91547	0	0	0	0	0	0	0	-3.57126	0	0	-13.4601	2.30658	-3.40588	3.51196	-5.69327	-15.4704	-9.27217	-7.43554	-7.75377	0	-19.136	-6.56397	0	-7.09942	0	-6.50361	-8.58832	0	0	0	-8.21957	-8.30981	0.0614405	0	-5.41037	-10.9241	-14.8851	0	8.06757	9.27677	-15.2306	-13.8605	-18.5835
ERV316A3_11q12.1a	-2.26103	0	0	-21.4378	0	0	-12.7573	-22.7437	0	-4.15605	-15.169	-9.63199	-25.5959	0	0	-14.8835	-32.9729	0	0	0	0	-28.116	-32.2856	-20.2597	-24.7847	4.96763	-36.5776	-22.3536	-13.87	-24.3119	-12.7407	-29.0463	-20.9325	-3.19312	-31.9062	0	-15.2036	-28.7337	3.83406	13.8765	0	-20.5752	-24.9318	0	0	10.5879	-41.5657	-31.5708	-36.1791
ERV316A3_11q12.3	-1.09957	0	0	0	-3.59237	0	0	0	0	0	0	0	-16.7763	0	0	-9.55834	-14.7368	0	-9.61751	0	0	0	0	0	0	0	0	-9.52949	0	0	0	-17.1202	0	0	0	-9.71941	0	-11.3764	0	0	0	-9.82434	0	0	0	0	0	0	0
ERV316A3_11q23.3f	-2.56985	0	-10.2122	-23.5236	0	0	-18.5625	-19.8165	15.9473	0	-19.1059	-6.59712	-25.6597	14.54	-14.5854	-15.3305	-34.9944	7.92315	0	8.37272	0	-21.1545	-24.2557	-18.4576	-22.9136	0	-29.9818	-21.6955	-11.3369	-26.1544	-12.7364	-26.4438	-17.7479	-2.45863	-34.2286	0	-11.0863	-21.4352	2.92948	0	-13.4364	-16.5388	-15.7965	-14.6128	15.014	10.0387	-34.2705	-29.7516	-26.2289
ERV316A3_12p11.23a	0	0	-6.31751	-8.7445	0	0	-11.0484	-10.4651	0	0	-15.8381	-4.04793	-12.3134	0	-12.0515	-6.93587	-25.3726	0	0.508997	3.03042	-10.4551	-19.5659	-9.72411	-14.8711	-16.1722	0	-33.9193	-7.70199	-5.27013	-16.4189	-10.5295	-14.0632	-13.9004	-1.65427	-24.3562	0	-10.1169	-9.20362	0.0754164	0	0	-10.9178	-18.4176	-11.5207	8.11798	6.95202	-28.3057	-21.3233	-30.7855
ERV316A3_12p11.23b	0	0	0	-11.414	0	0	-13.1113	-9.94444	5.2017	0	-13.8558	-6.94638	-15.9929	9.1934	0	0	-27.1632	6.66524	0	3.60426	-9.415	-20.1705	-9.62437	-15.1586	-16.3695	0	-35.5828	-12.3381	0	-14.901	0	-17.4894	-15.0713	0	-20.9849	0	0	-11.3746	3.05687	0	0	-14.0685	-15.0007	-9.07999	15.321	6.48755	-31.4496	-19.7383	-33.1319
ERV316A3_12p12.3a	-3.6819	10.5401	-21.0218	-51.7213	0	0	-29.0218	-47.1032	13.592	-2.58892	-40.1076	-33.5409	-75.4072	21.0552	-23.3588	-50.9196	-110.059	18.5152	-10.2624	0	-13.6781	-59.7964	-83.6673	-51.4312	-45.8252	8.90731	-87.2716	-73.433	-32.0181	-60.8232	-28.7963	-67.2219	-54.2432	-2.7788	-75.2014	-6.79057	-32.275	-60.7322	9.49946	11.8104	-26.6871	-69.6637	-67.3579	-42.2191	21.1487	20.9518	-111.851	-81.0926	-77.2106
ERV316A3_12p12.3c	0	0	0	0	-4.39067	0	0	0	0	0	0	0	0	0	0	0	0	0	0	0	0	0	0	0	0	0	0	0	0	0	0	0	0	0	0	0	0	0	0	0	0	0	0	0	0	0	0	0	0
ERV316A3_12q21.1	0	7.44987	0	-15.3031	0	6.75082	-11.4344	-24.4971	10.6731	0	-20.2837	-13.9427	-28.6958	7.89863	-18.5023	-14.2402	-45.5941	0	0	0	0	-25.6549	-34.4624	-36.4748	-16.8447	2.68604	-30.2262	-24.7854	0	-23.9491	-9.928	-25.6613	-19.0318	0	-24.0501	0	-13.8891	-44.4016	0.726144	0	-11.9841	-42.1818	-27.7055	-27.6475	8.268	0	-38.5198	-34.7953	-18.4403
ERV316A3_12q24.13	0	0	0	-19.519	0	6.58001	0	-18.0363	0	0	0	-20.2016	-31.4958	0	-14.3381	-22.5803	-46.642	6.80393	0	2.62497	-10.4467	-33.9741	-42.1457	-20.0157	-17.3	0	-45.8719	-36.2514	-15.5537	-37.8144	-10.6422	-29.0101	-27.0196	0	-36.3542	0	-17.3394	-20.128	0	0	0	-33.2648	-31.2149	-18.6609	0	7.2945	-55.808	-38.3648	-39.1591
ERV316A3_13q13.3c	0	0	0	0	0	2.30544	0	0	0	0	0	0	-8.34045	0	0	0	0	5.02211	0	0	0	0	-7.89804	-10.1027	0	4.65349	0	-7.79864	0	0	0	-7.36819	0	0	0	0	0	-14.8737	0	4.22215	0	-11.0287	0	0	0	0	0	0	0
ERV316A3_13q14.11a	0	0	0	0	-7.70418	8.27269	0	0	0	0	0	-10.2293	-12.0428	0	0	0	0	0	-9.10631	-1.36996	0	-13.4975	-18.717	-10.1975	0	0	0	-12.1682	0	-12.5299	0	-16.9476	-10.6352	-3.54326	0	-4.50473	0	0	0	8.99763	0	-18.8743	0	0	0	0	-16.4488	0	0
ERV316A3_13q14.13	0	0	0	-6.94191	0	3.10568	0	0	5.52751	0	0	0	0	0	-8.05306	0	0	0	0	0	0	0	0	0	0	0.990656	0	0	0	0	-4.84859	0	0	0	0	0	0	-5.92753	0	0	0	0	0	0	0	0	0	0	0
ERV316A3_14q13.3	-2.40629	0	-12.1991	-24.8948	0	0	-22.4588	-24.8697	0	-1.56926	-22.0063	-9.86485	-31.6688	0	0	-25.9324	-49.0549	5.82214	-2.17471	8.78599	0	-31.7977	-36.0918	-21.8269	-28.4277	2.95172	-48.7331	-24.421	-11.8882	-27.7804	-17.3363	-28.0101	-25.448	0	-43.4325	0	-16.9453	-28.8894	0	7.7885	-16.7723	-24.878	-34.215	-19.1254	12.6555	14.1149	-51.1578	-41.4112	-43.1037
ERV316A3_14q23.1e	0	4.51579	0	-12.3193	0	5.54834	0	-8.61817	9.78621	-3.02936	0	0	0	8.11286	0	0	0	4.94655	0	2.99418	0	0	0	-8.80825	0	5.64085	0	-9.03882	0	0	0	0	0	0	-14.6978	0	0	-9.1431	0	6.41532	0	0	0	0	0	5.02123	-12.4161	-15.5939	0
ERV316A3_15q21.3c	0	0	0	0	0	0	0	0	0	0	0	0	0	0	0	0	0	0	0	2.16057	0	0	0	0	0	0	0	0	0	0	0	0	0	0	0	0.819125	0	0	0	0	0	0	0	0	1.93868	0.327464	0	0	0
ERV316A3_15q24.1b	-1.34988	0	0	0	-2.33267	0	0	0	0	-0.679305	0	0	0	0	0	0	0	2.76964	-0.744588	0	0	0	0	0	-4.77324	0	0	0	0	-6.89756	0	-7.87402	0	0	0	-2.0888	0	0	0	4.36568	0	0	0	0	0	0	0	0	0
ERV316A3_15q25.1b	-1.2792	0	0	-4.81282	-1.70041	0	-6.05676	0	0	0	-3.78759	-1.01724	0	0	0	-3.80428	0	0	0	0	0	0	0	0	0	-0.488544	0	0	0	-4.90044	-3.24321	-4.35723	0	-1.27368	0	0	0	0	0	0	0	0	0	0	0	0	0	0	0
ERV316A3_15q26.3a	0	0	-11.9564	-31.6131	-7.89168	7.88	-26.4103	-30.6581	0	0	-21.825	-10.6877	-41.6376	0	0	-23.2311	-60.2539	8.44555	-8.89662	8.7417	0	-34.3018	-38.456	-33.5844	-29.562	7.17183	-45.5545	-30.3911	-13.9573	-28.6747	-12.8902	-28.7955	-30.3377	0	-42.745	-7.09069	-19.3252	-39.821	0	12.2425	-11.8419	-35.4684	-34.0669	-23.3763	17.5293	18.123	-51.3089	-44.6991	-43.5757
ERV316A3_16p12.1	-3.49319	0	0	0	-5.95163	0	0	0	0	-0.671943	0	-5.52677	-19.0085	0	0	0	-14.11	0	-2.07928	0	0	0	-11.5633	-12.2445	0	0	-13.0226	-9.08325	-8.79324	-12.9348	0	-18.2467	0	-3.36134	-12.1337	-2.97647	0	-12.2986	0	0	0	-12.1654	0	0	0	0	-15.1026	-10.8729	0
ERV316A3_18p11.32c	0	0	0	0	0	0	0	0	0	0	0	0	-10.694	0	0	0	0	0	0	0	0	0	0	-10.9959	0	0	0	0	0	0	0	-9.0101	0	0	0	0	0	-14.6234	0	8.56962	0	-11.4485	0	0	0	0	0	0	0
ERV316A3_18q21.1b	0	0	0	0	0	0	0	0	-0.0925851	0	0	0	0	0	0	0	-2.82126	-0.0292086	0	0	-0.380307	0	0	0	0	0	0	0	-2.50551	0	0	0	0	0	0	0	0	0	0	0	-1.29464	0	0	0	0	0	-3.01555	0	0
ERV316A3_18q22.3e	-2.50807	7.98101	-13.9151	-26.4625	0	4.18244	-25.9753	-24.2121	8.82793	0	-21.9007	-8.97495	-34.2233	6.6451	-16.9429	-21.4534	-36.3143	7.46898	0	7.6089	0	-17.354	-22.1415	-25.9111	-26.2082	0	-25.9066	-20.8673	-15.0588	-22.5753	-19.5236	-28.9645	-17.2268	-2.26728	-33.2469	0	-10.7702	-30.3654	0	0	-16.5347	-18.9144	-13.362	-11.2863	11.4402	14.4726	-40.903	-36.3651	-17.8438
ERV316A3_19q13.2	-2.4214	6.77217	0	-44.4315	0	0	0	-30.4063	0	0	-20.3459	-41.2627	-60.7829	6.06212	0	-51.1565	-76.2064	7.54612	0	0	0	-32.7157	-70.9039	-37.5243	-30.5904	7.13781	-45.3316	-67.8177	-29.5595	-51.6402	-17.3059	-57.9566	-24.6193	0	-52.7602	-5.61861	0	-46.5006	2.54329	13.1687	-17.0167	-59.033	-35.6824	0	0	6.9354	-87.561	-58.3676	-32.5354
ERV316A3_1p31.3f	-6.42701	18.7503	-28.5385	-58.2024	-9.9211	16.672	-40.0809	-56.3285	23.7452	-5.15687	-49.4101	-27.644	-77.3651	23.3038	-34.7802	-52.4268	-121.251	20.7952	-10.4567	12.8812	-16.7541	-71.283	-81.625	-63.3046	-64.8957	9.865	-101.058	-68.7171	-30.4088	-62.7945	-37.9317	-71.6631	-59.3562	-5.68171	-86.6637	-6.80416	-40.9261	-76.3236	6.90825	15.1716	-31.7879	-69.5123	-75.8714	-41.691	30.952	22.9699	-121.79	-98.9219	-91.8132
ERV316A3_1p32.1a	0	12.0121	0	-15.9492	0	17.6352	0	-12.5465	15.1776	-2.6578	-13.4748	0	-13.7717	12.7761	0	-9.96979	-29.1088	9.88351	-3.86317	6.58262	0	-22.0571	-19.3531	-19.608	-13.9877	6.58008	-26.4099	-15.9416	0	-15.0969	0	-17.281	-19.373	-3.29142	-24.9466	0	0	-18.4934	2.54509	8.3986	0	-19.4465	-19.6942	-13.217	15.6305	11.8353	-26.4399	-27.1978	-26.3739
ERV316A3_1p32.1c	0	2.18936	0	0	0	2.21031	0	0	2.72301	0	0	-8.50034	-9.90589	2.08959	0	0	0	3.36425	0	0	0	0	-7.50048	0	0	2.79306	0	-9.07983	-8.02318	-9.24023	0	-12.6689	0	0	0	0	5.84024	0	0	0	0	-7.04993	3.41346	0	0	0	-9.18185	0	0
ERV316A3_1p36.22a	0	14.4648	0	-23.9846	0	12.9035	0	0	14.2435	-3.71435	0	-20.6467	-31.7631	14.7376	0	-26.238	-47.455	8.21156	-7.58951	0	0	-31.6947	-42.8353	-18.1594	-16.9694	5.92875	-36.0767	-36.9024	-16.8054	-31.4978	0	-35.8161	-27.3204	0	-30.2369	-6.13092	-16.4575	-27.5914	5.72311	10.0041	0	-37.0855	-31.3628	-16.5461	0	7.87959	-50.5989	-32.4427	-32.6962
ERV316A3_1p36.22b	0	0	0	0	0	2.70727	0	0	3.318	0	0	-6.41557	0	0	0	0	-20.5761	5.40207	-5.17993	0	-7.83995	-18.6577	-15.2644	-7.92596	0	0	-25.0736	-12.9389	0	-9.7911	0	-11.7514	-10.8018	0	0	-2.5095	0	-10.1711	0.253605	5.45004	0	-13.0369	-13.2268	-8.64709	0	5.24535	-19.2526	-13.1498	-21.7656
ERV316A3_1q21.3b	-3.74498	0	0	-21.7055	-8.93401	0	-11.6211	-10.4074	12.4901	-2.76912	0	-9.24728	-14.5181	12.8723	0	-14.5775	-25.8914	4.60607	-7.47238	2.67981	0	-17.289	-23.1304	-10.1655	-16.0465	3.30872	-20.0577	-21.8175	-9.56294	-18.4574	-7.19659	-22.2143	-13.9386	-5.39789	-19.0455	-4.40438	-15.9187	-14.6392	0	9.98221	0	-18.2636	-14.6597	0	0	3.50728	-28.9436	-24.7049	-22.0499
ERV316A3_1q25.2b	-2.44709	10.9141	-13.6229	-29.2459	0	0	-14.1147	-28.9151	0	-2.11622	-25.6032	-18.1884	-46.0625	0	-22.7274	-26.4443	-59.4762	0	-9.50519	0	0	-35.9536	-52.6024	-32.3616	-27.9064	0	-38.3341	-47.9393	-16.9035	-36.2351	-18.6732	-40.1743	-29.7002	-2.76817	-42.3028	-6.41556	-20.6786	-39.5031	5.40075	0	-13.3933	-38.3906	-34.8759	-25.7508	15.7501	17.0586	-62.5549	-45.596	-32.7548
ERV316A3_1q25.3b	0	0	0	-12.6663	0	0	-11.8913	0	0	0	0	-10.8357	-14.8643	0	0	0	-18.2912	0	0	0	10.8689	0	-18.778	0	0	0	0	-17.4497	-10.0023	-16.1357	0	-12.8998	-9.95805	0	-16.1452	0	-14.48	-10.97	0	0	0	-21.7402	0	0	0	0	-19.2973	-20.1605	0
ERV316A3_1q32.2a	-4.96663	22.6079	-28.2021	-65.8464	-13.7327	0	-46.3519	-58.9638	24.4048	-4.11901	-47.1135	-29.3951	-83.758	32.9395	-32.6728	-60.0489	-120.699	23.8516	-13.4109	15.1467	-12.0252	-74.5415	-92.7967	-61.1616	-63.9026	9.66566	-100.782	-78.7731	-33.0488	-64.9763	-40.9243	-71.714	-65.0113	0	-84.0719	-10.0393	-48.3209	-75.659	11.9183	13.7572	-38.4029	-74.5327	-75.1798	-43.7277	26.8657	31.5391	-125.103	-100.906	-87.8661
ERV316A3_1q42.12b	-3.91069	9.52215	-11.5277	0	0	0	0	0	11.647	-3.78241	0	0	0	0	0	0	0	9.25597	0	5.51127	21.6811	28.3083	0	0	0	2.30192	40.4821	0	-13.0377	0	0	0	0	0	0	0	0	0	0	0	0	0	0	0	0	8.17148	0	0	48.6772
ERV316A3_20q13.33b	-2.52853	5.53457	0	-15.2281	-6.58983	0	0	-15.977	7.11775	0	0	0	-27.3351	0	-12.8859	-8.63854	-34.9561	5.53735	0	4.6306	0	-13.9253	-16.4471	-23.4584	-21.1242	0	-28.273	-20.2462	-8.97153	-26.0274	0	-20.7231	-16.3532	-2.44085	-31.1927	0	0	-17.6408	0.915681	0	0	-17.6331	0	-10.8677	0	0	-38.5474	-30.9032	-30.3675
ERV316A3_21q21.1f	0	0	0	0	0	0	0	0	0	0	0	0	0	0	0	0	0	0	0	0	0	0	0	-5.88739	0	0	0	0	0	0	0	0	0	0	0	0	0	-5.9524	0	0	0	0	0	0	0	0	0	0	0
ERV316A3_21q22.3b	-4.82396	0	0	-38.2189	-10.6285	0	-22.9207	-26.9398	0	-3.26288	-21.6736	-14.2894	-47.6598	0	0	-32.4665	-61.6479	15.3008	-15.7749	0	0	-35.9962	-56.6334	-31.8045	-25.7255	10.2216	-45.0472	-44.3458	-16.3173	-30.2819	-18.0125	-42.4774	-33.028	-3.10095	-39.3292	-12.3567	-23.2527	-47.1631	11.0613	12.6019	0	-38.7869	-38.2826	-18.5439	0	18.1418	-63.1739	-50.0249	-34.392
ERV316A3_21q22.3d	0	1.75426	0	-11.7059	0	0	-15.2539	-9.65076	2.72281	0	-10.7202	0	-15.0284	0	0	-7.02006	-22.5952	0	0	1.81268	-7.67463	-11.469	-9.44373	-10.3261	-16.1227	0	-26.7136	-8.46104	0	-14.1457	-7.0529	-11.2317	-8.92862	-1.16797	-21.3584	0	0	-8.26538	0	4.85272	-10.4869	-10.728	-12.7412	-6.27864	5.30461	6.29151	-25.6746	-19.5285	-26.4339
ERV316A3_21q22.3e	-3.65222	0	-15.5526	-25.303	-4.13733	0	-31.2913	-29.8342	0	0	-25.9028	-7.91067	-38.6358	0	-23.4076	-19.2835	-55.5374	5.16289	0	3.09378	-15.6156	-32.2678	-26.3623	-29.3871	-39.2782	0	-60.2601	-22.7603	-13.6685	-31.0891	-22.2572	-31.3976	-25.4925	-3.44142	-51.2262	0	-13.5445	-30.4743	0	0	-19.2449	-20.1738	-33.742	-17.0184	12.5989	9.51681	-61.0355	-45.1641	-56.675
ERV316A3_22q13.31b	0	0.122952	0	0	0	0	0	0	0	0	0	0	0	0	0	0	0	0	0	0	0	0	-2.47515	0	-2.20049	0	0	0	0	0	0	0	0	0	0	0	0	0	0	0	-3.37983	0	0	0	0	0	-4.51631	0	0
ERV316A3_2p16.1a	-2.74133	6.51496	-12.8402	-26.1875	-9.22549	5.4481	-17.3684	-20.8226	12.842	-1.44045	-22.1618	-9.3559	-30.4255	11.7864	-19.0218	-18.0875	-46.947	11.3415	0	11.7375	-7.73136	-26.8311	-26.0053	-18.8235	-29.0097	0	-44.4103	-25.1587	-16.322	-32.0445	-18.4745	-30.3003	-18.5668	-2.89131	-46.152	0	0	-23.117	0	0	0	-13.6011	-24.7256	-15.3386	16.6052	17.0579	-46.961	-37.5716	-38.2123
ERV316A3_2p25.3b	0	0	0	0	0	0	0	0	0	-0.245738	0	-5.62042	-9.37378	0	0	0	0	0	-1.05171	2.30818	2.61682	0	0	0	0	0	0	-6.84489	0	0	0	-8.36471	0	0	0	0	0	0	0	0	0	0	0	0	4.35996	0	0	0	0
ERV316A3_2q12.3d	-3.9476	15.8019	-12.1698	-28.4275	-8.23512	0	-33.7448	-29.5828	14.6218	-1.95724	-26.6312	-13.0364	-34.0668	0	0	-17.5935	-55.6736	13.6622	-8.28997	0	0	-42.0487	-44.2046	-36.3619	-24.2504	6.28093	-45.9083	-34.1662	0	-34.601	-20.8908	-36.9616	-36.9899	0	-44.8649	-6.82337	-27.2365	-41.2708	7.98924	0	-18.5183	-41.1056	-41.5767	-35.0833	13.7369	21.0838	-51.1297	-53.7061	-38.6972
ERV316A3_2q22.3c	-2.81503	0	-10.7924	-15.8431	0	0	0	-22.7811	0	0	0	-9.1154	-18.5281	0	-13.7478	-12.6224	0	0	0	0	0	0	-19.2385	-22.8935	0	0	0	-14.4566	-11.3377	-14.0924	-15.8612	-20.9718	-15.8764	0	-27.2885	0	-24.6018	-27.6653	0	0	-11.8156	-19.5042	-19.2151	-14.0906	0	7.6803	-29.2416	-29.9247	0
ERV316A3_2q31.1b	0	0	0	0	0	0	0	0	0	0	0	0	0	0	0	0	0	0	0	0	0	0	0	0	0	0	0	0	0	0	0	0	0	0	0	0	0	0	0	0	0	0	0	0	0.783244	0	0	0	0
ERV316A3_2q31.2	0	0	0	0	0	0	0	0	0	0	0	0	0	-0.672837	0	0	0	1.98912	0	1.61778	0	0	0	0	0	0	0	0	-1.5151	0	0	0	0	0	0	0	0	0	0	0	0	0	0	0	0	2.43722	0	0	0
ERV316A3_2q32.1i	0	0	-4.19005	-5.83958	0	0	0	-4.45225	0	0	-4.48719	0	-8.56027	0	-4.25435	-5.97629	-8.40327	0	0	0	0	0	-8.56143	0	-5.38484	0	0	-8.08611	-5.64278	-6.1484	-4.00796	-6.61625	0	0	-4.83817	0	0	-4.63129	0	0	0	0	0	0	0	0	-13.1381	-4.95766	0
ERV316A3_2q32.2c	0	0	0	0	0	0	0	0	0	-1.66458	0	0	0	0	0	0	0	0	0	0	11.7752	0	0	0	0	0	0	0	0	0	0	0	0	0	0	0	0	0	0	0	0	0	0	0	0	0	0	0	0
ERV316A3_2q35f	-2.74172	0	-30.2359	-45.2287	0	0	-41.9475	-56.9299	11.593	0	-45.8576	-20.7699	-66.206	15.024	-43.7544	-40.6419	-108.14	10.5279	-8.17615	7.87177	-20.385	-69.3668	-69.1196	-54.2039	-56.9418	0	-102.783	-54.7579	-22.7795	-56.5015	-42.1589	-54.1249	-55.6771	-2.99568	-84.2053	-6.85492	-43.2361	-62.3659	0	0	-25.7683	-50.9018	-72.9308	-46.4161	22.494	15.4515	-110.144	-86.0584	-87.932
ERV316A3_3p21.31c	0	7.1361	0	-17.2268	-6.30818	0	0	-19.1016	0	0	0	-13.3321	-20.2747	0	0	0	-32.3506	4.79028	-6.5693	6.88764	0	-27.9117	-29.8385	-23.4434	-16.4677	0	-34.6247	-27.4573	0	-27.8304	0	-24.3494	-23.2992	0	-31.8166	-4.94341	-15.0929	-30.1477	4.8046	0	0	-29.5176	-27.2758	-16.5242	0	15.758	-38.9448	-32.6061	-33.5646
ERV316A3_3p25.2d	0	0	0	0	0	0	0	0	0	0	0	0	0	0	0	0	0	0	-2.18271	0	0	0	0	-3.07741	0	0	0	0	0	0	0	0	0	0	0	-1.78183	0	0	0	0	0	0	0	0	0	0	0	0	0
ERV316A3_3q12.1c	0	0	0	0	0	0	0	0	0	0	0	0	0	0	0	0	-8.76058	0	0	0	-5.73558	-5.88379	0	-3.3666	0	0	-12.7429	-2.24948	0	0	0	-2.68536	-2.99588	0	0	0	0	-3.22988	0	0	0	0	-6.56039	0	0	0	-8.01364	0	-12.1664
ERV316A3_3q13.12c	0	6.80441	-17.3821	-34.3132	0	12.5849	0	-31.1098	13.8067	-3.70815	-24.5342	-29.7282	-56.0219	0	-21.0859	-43.5155	-75.6725	9.65648	-8.6137	0	-10.6243	-37.0204	-58.7317	-34.6182	-29.2606	0	-58.7737	-54.041	-30.6245	-46.8002	-21.4727	-48.0796	-35.5079	-4.72506	-47.0808	-4.26269	-19.2491	-40.0482	0	0	-13.4406	-44.3576	-42.8837	-27.7124	0	15.1669	-79.3859	-50.1202	-44.9998
ERV316A3_3q13.13b	0	10.6704	0	-14.7318	0	18.2205	0	0	0	0	0	-12.0403	-20.0608	0	0	0	-28.8578	9.83966	0	0	-7.42131	-18.5154	-24.4227	0	-13.9592	11.2067	0	-19.6292	0	0	0	-23.3138	-17.5436	-4.11339	0	0	0	-21.8662	4.97048	16.2369	0	-20.8986	-18.7927	0	0	0	-27.7779	0	-26.8084
ERV316A3_3q13.13d	0	0	-8.4594	0	0	0	0	0	0	-0.647647	0	0	0	0	0	0	0	0	0	3.93519	0	0	0	0	0	0	0	0	-6.78135	0	0	0	0	0	0	0	0	-11.0677	0	0	0	0	0	0	7.20898	4.81428	0	0	0
ERV316A3_3q13.31b	0	0	0	0	0	0	0	0	-2.76782	0	0	0	0	-3.26992	0	0	0	0	0	0	0	0	0	0	0	0	0	0	0	0	0	0	0	0	0	0	0	0	0	0	0	0	0	0	-0.39886	0	0	0	0
ERV316A3_3q27.1a	0	0	-16.9816	-31.8414	0	0	-18.3698	-17.9235	0	-2.10662	0	0	-29.7291	0	-14.4589	-27.1965	-36.5091	0	-6.42004	13.66	0	0	-29.3675	-16.6739	-22.4168	0	-33.711	-28.4063	-18.0053	-18.2321	-18.5801	-21.2208	0	0	-29.3971	0	-17.2553	-29.3903	2.54238	0	0	-16.8299	-28.712	0	0	18.7278	-45.4644	-29.1545	-28.1532
ERV316A3_3q27.3c	0	0	0	0	0	0	0	0	0	0	0	0	0	0	0	0	0	0	-1.24928	0	0	0	0	0	0	0	0	0	0	0	0	0	0	0	0	0	0	0	0	0	0	0	0	0	0	0	0	0	0
ERV316A3_3q27.3d	0	0	0	0	0	0	0	-2.69555	0	0	-2.56843	0	-3.55752	0	0	0	-5.38782	0	0	0	0	0	0	0	-3.74308	0	-3.92699	-1.62445	0	-2.45948	0	-1.94419	0	0	-5.03633	0	0	0	0.0102589	2.22274	0	0	0	0	0	0	-4.87972	-3.41388	-4.50054
ERV316A3_3q27.3e	0	10.7444	0	-14.0239	-6.08531	17.6204	0	-19.1766	12.162	0	0	0	-25.39	0	-18.3079	0	0	0	-10.0501	4.88358	-10.8325	-25.7723	-21.611	-33.197	-17.4425	0	-45.5062	-17.6981	0	-21.7351	0	-15.5889	-26.2421	0	-28.5965	-8.15283	0	-36.8948	0	0	0	-24.724	-26.0331	0	15.6939	12.0108	-41.3317	-30.6432	-37.1867
ERV316A3_3q29	0	0	0	-9.76961	-7.07311	0	-12.2271	-14.8017	4.52603	0	-15.226	0	-16.9094	0	0	-7.96527	-35.9095	13.0273	0	0	-11.4225	-22.2697	-16.3649	-18.7432	-18.0489	0	-38.2901	-15.1369	0	-16.3884	-8.51732	-17.7131	-18.9179	0	-26.451	0	-13.2418	-18.0485	2.52353	0	0	-17.5006	-26.017	-13.254	0	6.2654	-33.1164	-24.7691	-37.9526
ERV316A3_4q21.3	-0.857942	0	0	0	-1.05437	0	0	0	0	-0.74656	0	0	0	0	0	0	0	0	0	2.97631	0	0	0	0	0	4.55887	0	0	0	0	0	0	0	-1.02545	0	0	0	0	0	0	0	0	0	0	0	0	0	0	0
ERV316A3_4q22.1a	0	0	0	0	0	0	0	4.76962	0	0	5.05221	0	0	0	0	0	19.9425	0	0	0	12.0633	13.8019	0	3.80429	9.82146	0	29.4179	0	0	0	0	0	7.60663	0	10.1655	0	0	4.28886	0	0	0	0	14.5994	4.0851	0	0	13.8883	0	29.5152
ERV316A3_4q31.1b	0	9.79009	-23.3925	-44.0826	0	19.9173	-23.3786	-41.1049	11.4289	0	-29.7867	-25.0404	-60.9361	12.3233	0	-40.0041	-84.4288	13.4197	-8.5179	10.701	-15.9099	-46.4711	-66.9464	-43.6948	-41.7424	8.29352	-68.3526	-54.2266	-28.8228	-50.4202	-25.4856	-51.5898	-41.3041	0	-62.9044	-6.04257	-26.2918	-54.0433	0	14.413	-17.2518	-54.5516	-56.2055	-29.0951	19.4006	21.4395	-88.6906	-64.0522	-59.0063
ERV316A3_4q31.23b	-4.75047	14.1269	-22.7048	-53.1383	-12.6457	14.6039	-29.6737	-45.9823	18.6161	-3.5976	-39.1762	-26.3288	-61.4617	20.5339	-26.1094	-49.3522	-93.9817	20.978	-12.6133	0	-13.0184	-57.5299	-67.8988	-47.5972	-51.6915	9.27489	-79.2167	-59.2352	-28.7792	-52.2406	-33.112	-61.0127	-46.9765	-3.74791	-68.9949	-9.14775	-35.2202	-60.2204	8.33017	13.1377	-30.1547	-57.125	-61.1436	-30.2882	24.0207	26.3274	-97.1729	-80.0193	-71.9738
ERV316A3_4q31.23c	-3.81997	22.5433	-20.124	-39.2134	-14.4433	14.0882	-28.0578	-42.1704	21.7338	-7.85492	-32.1575	-21.064	-61.23	27.7463	0	-38.2145	-81.7818	22.2761	-13.9618	12.7014	0	-55.963	-65.1229	-56.2363	-43.8124	12.6421	-72.3482	-55.7047	-19.9123	-46.2264	-22.9121	-59.0094	-44.876	-5.09987	-65.0892	-9.16565	-32.3405	-71.5468	10.2557	15.3487	-22.7807	-62.4863	-59.5108	-31.6264	27.4296	31.7471	-86.2366	-78.2187	-61.807
ERV316A3_5p13.3e	-1.84	3.59391	0	0	-2.07757	0	0	0	0	-0.792966	0	0	-9.25528	0	0	0	0	0	0	0	0	0	0	-10.739	-7.80405	0	-8.60671	0	0	-6.95655	0	-4.91454	0	-1.91624	-13.2215	0	0	0	0	0	0	0	0	0	0	3.7643	-13.4088	-11.0997	-12.3063
ERV316A3_5p14.1b	0	0	0	0	-3.80177	0	0	0	0	-1.3103	0	-8.10737	-14.6535	0	0	0	-13.6675	5.27711	-4.06968	0	0	0	-15.6071	-13.6526	0	6.39878	0	-15.8257	0	-11.0611	0	-16.9689	0	0	0	0	0	-15.9921	0	9.36882	0	-19.4979	0	0	0	0	-15.0865	0	0
ERV316A3_5p15.2e	0	7.42735	0	0	-8.02975	5.47352	0	0	0	0	0	0	-18.7992	0	0	0	-27.3503	0	-11.1562	0	0	-10.4588	-15.5197	-20.8659	0	7.02144	0	-13.8789	0	0	0	-19.6461	-10.0872	0	0	-5.87957	0	-23.4103	0	0	0	-19.3181	0	-11.1713	0	0	-19.25	0	0
ERV316A3_5p15.32a	0	9.3374	0	0	0	5.65885	0	-7.63032	11.3864	0	0	0	-13.9299	9.33492	0	0	-15.3021	5.28267	0	0	0	0	0	-19.3198	-7.01178	6.52647	0	0	0	0	0	-8.54921	0	0	0	0	0	-25.9964	0	4.79462	0	-16.333	0	0	0	0	0	0	0
ERV316A3_5q13.2a	0	0	0	0	0	0	0	0	0	0	0	0	0	0	0	0	0	0	0.307367	0	0	0	0	0	0	0	0	0	0	0	0	0	0	0.230064	0	0.447385	0	-7.30849	0	0	0	0	0	0	0	0	0	0	0
ERV316A3_5q14.3a	0	8.28899	-12.4645	-31.6317	0	8.82815	-19.5123	-27.8424	9.76765	0	-19.278	-31.174	-43.5483	18.0463	0	-39.1758	-49.5808	0	-6.94807	0	14.8292	0	-54.3808	-39.5706	-20.4396	5.72187	0	-46.6527	-23.7108	-36.1833	0	-39.3001	-21.1973	0	-36.6222	-7.08532	-21.5797	-51.8511	0	12.6524	-21.4241	-56.5581	0	-18.5411	0	12.5093	-57.1592	-49.1668	0
ERV316A3_5q14.3e	0	0	0	0	0	0	0	0	-2.48651	0	0	0	0	-2.95041	0	0	0	0	-3.35319	0	0	0	0	0	0	0	0	0	0	0	0	0	0	0	0	0	0	0	0	0	0	0	0	0	0	0	0	0	0
ERV316A3_5q23.1b	0	0	0	-18.7762	0	12.6008	0	0	6.04587	0	0	-9.57233	-23.2157	0	0	-19.917	-35.8183	0	-5.82303	0	0	-17.0496	-26.6692	0	0	0	-20.1666	-22.8849	-11.3897	-15.696	-9.90665	-14.8249	-15.2247	0	-19.0052	0	0	0	1.92592	0	0	-16.5207	-21.9844	0	0	0	-28.774	-19.7223	0
ERV316A3_5q31.3c	-1.81263	0	-9.52297	-17.5757	0	0	0	-15.123	0	-1.45571	0	0	-21.5169	0	0	-10.8894	-22.7671	6.5391	-7.31674	3.67176	0	-11.3822	-17.1698	-9.89058	-12.9948	4.98689	0	-11.9515	-8.67454	-11.1126	-13.7114	-15.397	0	0	-26.4696	-2.65064	0	-16.2705	0	0	-8.32609	0	-12.2102	0	0	0	-16.666	-24.0892	0
ERV316A3_5q35.3c	-2.45567	0	-8.13351	-16.7724	0	0	0	0	0	-1.84188	0	0	-15.0826	0	0	-13.5317	0	0	-6.02338	5.47662	0	0	-14.389	0	0	4.16829	0	-10.9753	0	0	0	-11.7609	0	-2.02839	0	0	0	0	0	0	0	0	0	0	0	9.15526	0	0	0
ERV316A3_5q35.3d	-1.19848	1.77419	0	-5.75406	0	0	0	-5.72719	0	0	-8.205	0	-12.1715	0	0	-5.95364	-14.4562	1.73714	0	1.80892	-6.2291	-5.82355	-5.04352	-7.51313	-10.8292	0	-17.9855	-6.03176	-4.13817	-9.44657	0	-9.58665	-5.94374	-1.02354	-15.7559	0	0	-5.52098	0	5.99487	0	-5.68305	-7.84148	0	0	4.38532	-19.48	-13.8929	-21.3564
ERV316A3_6p21.2a	-5.48844	12.9634	-24.3092	-51.8917	0	10.724	-40.4824	-48.4724	18.5328	-3.41021	-39.1369	-24.5401	-70.7467	25.9162	-23.7835	-44.8014	-104.606	22.9442	-13.1191	12.7829	-12.1522	-58.7497	-73.4111	-54.0408	-53.753	11.5878	-88.6031	-62.5233	-27.6156	-54.3061	-31.6143	-61.8135	-49.0011	-4.22714	-74.2851	-9.11049	-37.5074	-70.807	10.2704	11.2165	-32.562	-59.9267	-63.1702	-30.3656	25.437	28.1577	-108.024	-82.9138	-74.8174
ERV316A3_6p21.2b	-5.53169	8.98298	-28.2421	-51.6735	-11.5252	0	-45.1656	-55.6064	20.5408	-3.48792	-45.0012	-24.8733	-73.2361	25.3798	-32.265	-47.7498	-106.54	21.1297	-12.6311	10.0712	-14.3911	-68.4533	-75.347	-55.9354	-58.9508	7.43842	-91.3393	-59.8061	-28.3395	-56.1566	-36.8875	-61.4904	-54.9088	-4.31182	-80.3121	-9.67364	-40.2947	-72.8841	7.60728	10.6249	-33.2038	-64.3346	-72.9446	-40.1098	18.7152	20.6139	-105.508	-90.9732	-84.7676
ERV316A3_6p21.33b	0	24.7453	-25.7746	-62.4796	0	14.9563	-31.4467	-53.9462	32.9732	-4.28763	-37.4999	-40.3977	-82.3132	38.2514	-27.8426	-60.6053	-118.243	19.7306	-9.53722	16.7673	-17.0687	-68.575	-94.2284	-61.2852	-57.459	10.9307	-96.4748	-81.4893	-38.3491	-70.5304	-30.0161	-73.9074	-59.5443	0	-77.1836	-6.02227	-33.4821	-75.6166	8.87697	14.3445	-27.726	-76.0969	-70.2384	-41.4767	38.3011	28.145	-122.889	-86.2968	-84.6516
ERV316A3_6p22.1a	-0.294073	0	0	0	-3.67272	0	0	0	0	0	0	0	-10.3253	0	0	0	-15.8725	0	-7.80622	0	0	0	-10.4061	-11.0915	0	6.38606	0	-10.1416	0	0	0	-8.59622	0	0	0	-5.43843	0	-11.373	0	0	0	-12.3016	0	0	0	0	0	0	0
ERV316A3_6p22.1i	0	10.5034	0	0	0	12.2294	0	-19.5354	12.7107	0	0	0	-34.4937	10.4575	-19.6874	0	0	5.91449	-6.47101	0	0	0	-19.4266	-37.6807	-20.6966	0	-32.8085	-18.9462	0	0	0	-19.3336	-17.0491	0	-23.3665	-5.93421	0	-39.4637	0	0	0	-27.2425	0	0	19.0577	13.0024	-35.3416	-24.2594	0
ERV316A3_6p22.1k	0	8.58232	0	0	-9.59577	11.7036	0	-15.997	14.0255	0	0	0	-17.2898	0	0	0	-28.1298	14.0178	-9.60294	0	0	-18.0475	-12.7938	-22.8114	-16.0169	7.6054	-25.1428	0	0	0	0	-12.9424	-18.6759	0	-26.4757	-7.32781	0	-29.7525	0	0	0	-18.058	-25.3615	-13.4864	16.699	11.4494	-22.5055	-27.7227	-22.2577
ERV316A3_6p22.1m	-2.35698	6.11584	-12.1564	-28.7613	-7.08459	9.00149	-26.2398	-29.2827	11.2636	0	-25.4459	-10.6514	-35.0753	10.4453	0	-18.1134	-63.9983	12.7237	-9.57564	9.70457	-10.2553	-43.4457	-37.7197	-32.2904	-29.7309	5.45176	-58.5725	-29.026	-11.5518	-33.2597	-18.0212	-31.5623	-36.0156	0	-51.2875	-3.87044	-21.8558	-34.7937	0	13.1189	-11.429	-32.6411	-43.8822	-28.5964	20.7073	19.1826	-58.5804	-52.3812	-55.5556
ERV316A3_6p22.1n	0	0	0	0	0	0	0	0	0	0	0	0	0	0	0	0	0	0	0	0	0	0	0	0	0	0	0	0	0	0	0	0	0	0	0	-4.9078	0	0	1.73172	0	0	0	0	0	17.1757	7.63274	0	0	0
ERV316A3_6p22.1p	-4.56837	0	-15.6572	-32.0365	0	10.3174	-27.6748	-33.8688	22.8414	-3.24566	-24.3498	-13.4599	-42.1943	22.6712	0	-31.332	-60.2721	19.1535	-6.19373	9.86296	0	-39.4203	-45.1108	-33.6618	-37.4181	8.89583	-53.6805	-36.5729	-19.4525	-33.4123	-21.7695	-41.6834	-35.2705	-2.55898	-49.4989	-5.19879	-26.1436	-43.6131	7.70771	0	-26.3496	-38.1478	-40.3862	-24.1994	24.3431	20.6899	-57.5915	-53.9272	-47.6128
ERV316A3_6p25.1b	-1.77923	3.14773	0	-13.8245	0	0	-14.3767	-21.08	4.85263	0	-19.836	-8.11011	-26.1512	0	-15.281	-11.6052	-41.9111	6.44069	0	4.61884	-14.7159	-25.8503	-19.0608	-25.4146	-29.7005	0	-54.134	-18.3396	-8.02057	-23.9782	-14.5099	-27.5241	-18.2129	-1.60209	-39.3218	0	0	-24.1425	0	0	-13.5134	-14.2643	-26.0312	-13.3358	10.6134	10.9108	-52.7443	-37.3039	-46.294
ERV316A3_6p25.1c	-0.597825	0	0	-4.55241	0	0.525027	0	0	0	-1.38946	0	0	-5.1307	0	0	-5.38464	-10.4042	2.48423	0	0	0	0	0	-12.7407	-3.78742	0	-6.1238	-4.64809	0	0	0	-6.19631	0	0	0	-2.44358	0	-11.8197	0	0	0	-11.0005	0	0	0	0	0	0	0
ERV316A3_6p25.1e	0	16.4266	-16.3791	-30.6986	0	17.5243	-17.619	-35.4932	20.4171	-2.65825	-22.9766	-24.5418	-46.4219	22.5942	0	-32.1351	-77.2207	16.7437	-8.35686	8.04013	-10.08	-48.6303	-57.3939	-40.1849	-36.8913	11.5913	-60.9513	-45.349	-16.6001	-41.2204	-17.2414	-48.9413	-39.2695	0	-52.6532	0	-27.7725	-48.2001	7.54319	15.128	0	-47.9864	-51.9357	-30.4874	19.0366	17.4113	-70.2335	-58.9083	-56.5707
ERV316A3_6p25.3a	-0.317271	0	0	0	0	0	0	0	0	-0.571784	0	0	0	0	0	0	0	0	0	0	0	0	0	-4.2918	0	0	0	0	0	0	0	-4.16037	0	0	0	0	0	0	0.943577	0	-4.60974	0	0	0	0	1.14711	0	0	0
ERV316A3_6q13b	-2.6054	2.83265	-6.32429	-12.1684	0	0	-16.6739	-11.618	4.14804	-2.59574	-9.86544	0	-17.4531	3.96625	-9.87032	-7.51419	-22.428	2.57971	0	1.53588	-5.89041	-12.0802	-11.1892	-14.961	-20.1216	0	-27.2356	-8.43534	-5.95536	-15.9796	-7.18554	-12.7034	-10.3932	-2.54747	-24.1832	0	0	-10.4635	0	5.78066	-11.7082	-11.8482	-14.1153	-6.86195	0	2.93545	-30.6949	-23.5669	-26.4891
ERV316A3_6q22.31b	-4.23218	11.3179	-21.7016	-42.0142	0	20.7784	-30.29	-41.5718	17.4149	-2.83853	-32.0811	-21.0913	-52.0635	14.1817	-19.1984	-37.0709	-80.5088	20.0373	0	12.4379	-9.97846	-54.1694	-62.869	-42.7882	-45.0503	12.6286	-71.1679	-49.9538	-20.5236	-46.0737	-29.4746	-52.6758	-46.0009	0	-60.058	0	-34.191	-58.7981	8.72052	10.1253	-25.1959	-53.0998	-61.4078	-31.1597	28.5209	22.8908	-80.9027	-73.1392	-65.8628
ERV316A3_6q24.2a	0	0	0	0	0	0	0	0	0	-0.784506	0	0	0	0	0	0	0	0	0	6.24323	8.31087	0	0	0	0	4.92188	0	0	0	0	0	0	0	0	0	0	0	0	0	6.61758	5.8449	0	0	8.29051	0	5.96702	0	0	0
ERV316A3_7p15.3a	0	1.19971	0	0	0	0	0	0	0	0	0	0	0	2.31604	0	0	0	0	0	0	0	0	0	0	0	0	0	0	0	0	0	0	0	0	0	0	0	0	1.69937	0	0	0	0	0	0	0	0	0	0
ERV316A3_7p22.3	-3.62201	0	0	-17.5615	-2.60192	0	0	-11.9274	0	-3.14817	0	0	-23.1389	0	0	-18.26	-18.1187	0	-7.11994	0	4.51123	0	-12.5808	0	-14.1323	6.25716	0	-11.4516	-11.6044	0	0	-14.5069	0	-2.20599	-25.866	-7.30049	0	-12.6981	0	0	0	0	0	0	0	0	-16.3367	-19.1316	0
ERV316A3_7q31.1c	-3.57069	0	-19.0231	-32.7012	-4.92167	5.35059	-26.3604	-31.4567	11.9026	-1.72762	-22.0395	0	-40.2694	9.68119	-24.4931	-15.8598	-52.585	10.8765	0	14.3238	-8.84584	-23.9612	-28.6133	-28.2502	-36.0886	0	-46.7785	-26.7412	-17.2512	-28.9974	-23.0952	-27.0963	-23.0955	-3.44486	-44.9892	0	0	-35.243	0	0	-15.4092	-12.9099	-23.0991	-13.8624	21.3674	21.0994	-53.6402	-36.6656	-37.6621
ERV316A3_7q33a	0	0	0	-16.3645	0	0	-17.1424	-10.4397	0	-1.03279	0	0	-10.3073	0	0	0	0	6.43279	0	0	6.15636	0	-13.1301	-9.35762	-12.5597	5.11409	0	-12.3349	0	0	-8.86124	-11.6543	0	0	0	2.08643	0	-10.1999	0	0	0	0	0	0	0	0	0	-15.3558	0
ERV316A3_8p21.2b	0	0	-10.2254	-11.6324	0	0	0	-11.2149	0	0	-9.89656	-8.18931	-18.089	0	0	-13.9291	0	0	0	0	0	0	-19.9527	-9.2422	0	0	0	-16.3501	-8.99223	-12.7245	-13.3349	-18.8217	0	0	-20.4405	0	-12.0958	-16.2076	0	-7.01915	0	-15.6376	-18.3063	0	0	3.35695	-23.0467	-17.0585	0
ERV316A3_8q11.23b	0	-4.41421	0	-17.5651	0	0	-14.3357	-26.1516	0	0	-20.2136	-10.6559	-26.492	0	-18.7039	-15.1832	-47.6419	0	-5.79423	5.33561	-15.1132	-35.0344	-27.7706	-28.7014	-24.6397	0	-60.5043	-21.8679	-11.0946	-25.0783	-12.7418	-23.58	-28.2165	0	-42.0966	0	-16.1185	-34.8561	0	0	-10.7289	-25.192	-40.2744	-19.8007	0	8.12863	-54.1124	-42.6332	-50.5152
ERV316A3_8q13.3a	-5.3923	19.6949	-16.4622	-48.3541	-10.7587	16.4289	-31.2704	-41.1682	21.7634	-3.43718	-36.0722	-17.504	-68.5244	20.9143	-23.7867	-41.315	-83.6038	22.5391	-14.9645	11.2598	0	-45.4119	-62.2824	-44.4979	-44.7551	10.4665	-68.6661	-55.5074	-24.0572	-48.6196	-27.0634	-53.8213	-39.0241	-3.71091	-71.4295	-11.4499	-30.1457	-56.4149	11.9537	0	-23.1112	-47.67	-46.334	-27.0558	28.8487	26.6231	-91.289	-77.3333	-57.0941
ERV316A3_8q23.1c	0	15.6266	-19.5297	-51.0184	0	11.2895	0	-38.3743	28.9274	-3.34971	-26.6598	-35.1225	-62.4847	27.9615	0	-47.4992	-89.6787	24.2038	-7.8568	12.4529	0	-51.8074	-76.806	-41.959	-39.5693	10.2016	-64.9173	-68.1564	-32.2605	-50.5671	-27.1372	-62.9672	-42.8668	-4.8548	-54.3361	0	-29.701	-57.7314	6.88879	13.0978	-21.3854	-63.5526	-54.7515	-29.248	0	24.8944	-93.8759	-64.9605	-54.5683
ERV316A3_8q24.12b	0	0	0	-7.50746	0	0	0	0	0	-0.829877	0	-6.75944	-20.9455	0	0	-6.5898	-14.3764	0	0	0	0	0	-7.84475	-13.3538	-10.2106	0	-11.5811	-11.6475	-4.80298	-13.2876	0	-17.7499	0	-1.87914	-18.7907	0	0	-10.4473	0.22126	0	0	-13.0116	0	0	0	0	-25.8788	-17.7245	-15.2684
ERV316A3_8q24.12c	-3.52029	9.25547	-13.7468	-23.7242	0	10.3869	-24.0687	-26.5324	16.5354	-2.1081	-16.5391	0	-30.4485	14.6927	0	-15.2471	-46.1413	19.7102	-4.81694	8.02925	-10.9253	-23.9584	-24.4223	-22.9387	-33.1825	7.72242	-53.1964	-22.0961	-13.7751	-22.0076	-17.0329	-29.9812	-24.1785	-2.61589	-42.3334	0	-15.9931	-28.6825	0	0	-17.7872	-16.9273	-31.1146	0	13.8412	16.6993	-45.117	-38.4498	-44.665
ERV316A3_9p21.1b	-3.12535	0	0	-12.6812	-8.19186	7.34014	0	-12.9144	0	-2.13801	-18.007	0	-23.9945	0	0	-11.5393	-29.0611	0	-4.14172	0	0	-13.5194	-23.7665	-27.8082	-11.0925	0	-22.8027	-21.1688	0	-18.7019	0	-26.8702	-13.1595	-2.42904	-21.6751	-4.07784	0	-31.6852	0	0	0	-30.3773	-17.2467	0	0	0	-29.7865	-18.5637	-21.7412
ERV316A3_9q32a	-5.76963	20.4343	0	-46.2479	-10.5286	21.1208	0	-33.5973	27.4571	-3.44798	0	-22.439	-53.4837	24.9678	0	-36.4128	-64.9366	25.3924	-13.0123	12.7012	0	-26.1795	-57.5722	-37.1969	-32.1862	13.7092	-42.0921	-53.4888	-25.4681	-37.2036	-17.6394	-51.1645	-29.8918	0	-49.2604	-10.3007	-25.8501	-53.3535	12.9132	12.6113	-20.1114	-44.4208	-30.5214	0	29.7497	29.2712	-70.6422	-58.2136	-30.6912
ERV316A3_9q34.2a	-3.70825	0	-24.4679	-60.1319	0	9.50787	-36.9393	-51.8127	15.7082	-2.28991	-39.1621	-35.9943	-78.4448	17.4076	-28.0533	-53.9978	-109.683	20.3551	-9.19651	12.287	-11.6367	-61.7036	-87.7027	-48.9855	-53.018	9.08147	-83.0533	-74.5358	-36.2661	-62.2917	-36.0648	-66.6471	-53.234	-3.04549	-74.1283	-6.62874	-36.8669	-62.1011	6.34118	13.2787	-29.2441	-71.2274	-65.9074	-37.6236	30.0684	26.1042	-112.844	-87.2625	-72.5545
ERV316A3_9q34.2b	0	0	0	0	0	0	0	0	0	0	0	0	0	0	0	0	0	0	0	0	18.8131	19.0562	0	0	0	0	29.595	0	0	0	0	0	0	0	0	-3.67767	0	0	0	0	0	0	0	0	0	0	0	0	32.7208
ERV316A3_9q34.3b	-7.52644	22.6025	-27.6477	-52.8403	-18.6909	17.1694	-43.1549	-56.3797	23.5788	-7.7516	-44.0799	-20.3281	-71.4401	25.2971	-31.8964	-45.7615	-97.9014	21.3645	-11.448	14.1037	-9.8243	-62.2147	-72.8985	-58.5629	-60.2702	10.5951	-88.268	-60.2167	-27.5184	-55.6759	-35.0374	-63.6578	-55.1428	-8.53166	-80.3853	-9.08161	-45.5212	-75.4961	10.8255	11.3496	-29.8194	-61.2219	-65.2131	-39.9591	26.3791	29.2517	-101.523	-93.0341	-79.8765
ERV316A3_Xp22.11	-1.34501	0	-10.1832	-20.546	0	0	-18.7811	-25.1614	0	0	-24.7601	-17.478	-29.7791	0	0	-21.4218	-47.5855	5.94609	0	0	0	-35.7504	-36.4214	-38.4887	-22.3634	0	-39.1836	-25.3585	0	-24.3856	-11.7528	-30.9782	-30.6943	0	-41.6222	0	-24.8508	-37.3274	0	0	-19.6618	-43.4711	-37.9378	-27.0411	0	0	-47.7121	-49.1072	-32.9305
ERV316A3_Xq28i	0	0	0	-7.27265	-3.20372	0	-8.97844	-12.6712	0	0	0	-5.76828	-12.7276	-2.63522	0	0	0	1.04652	0	0	-6.69693	-12.6336	-10.3037	-14.8257	-12.1225	0	-25.583	-8.04564	-5.71373	-17.6094	0	-10.96	-10.8149	0	-22.6422	0	0	-15.4729	0	0	0	-10.9311	-15.72	0	0	0	-25.5294	-18.7128	-21.6624
ERV316A3_Xq28k	0	0	-3.62275	0	0	0	0	-6.90481	0	0	-5.58282	-3.12506	0	0	0	-4.45641	-13.0031	0	0	2.19899	-2.91274	-10.718	-10.6235	-5.79463	-6.27995	0	-12.2647	-7.11253	0	-6.09491	-4.22465	0	-8.28553	0	-9.27103	0	-7.20225	-8.66643	0	0	-3.98033	-9.07242	-11.7849	-5.37337	5.09832	3.6253	-11.6784	-11.3438	-11.6702
ERVL_10p14	0	0	0	0	0	0	0	0	0	0	0	0	0	0	0	0	0	0	0.156177	0.158502	0	0	0	0	0	0	0	0	0	0	0	0	0	0	0	0	0	0	0.040943	-2.11207	0	0	0	0	0	0	0	0	3.3678
ERVL_11p14.3	-5.03322	29.3128	-17.3969	-42.7127	-10.1056	20.2122	-25.4059	-38.3562	22.04	-5.62714	-30.2684	-25.7061	-71.1414	22.2011	0	-45.005	-89.2602	21.0379	-14.61	0	-11.7401	-50.4035	-72.7818	-45.1203	-40.3016	15.7123	-78.0676	-65.7476	-25.2035	-51.3683	-19.1143	-64.2086	-45.4678	-3.20943	-57.9092	-9.7042	-26.1129	-61.0173	13.3731	19.4973	-20.6196	-56.7711	-56.4345	-27.5777	18.8398	23.042	-102.893	-69.7123	-69.0408
ERVL_13q21.1b	0	-0.000175491	0	0	0	0	0	0	0	0	0	0	0	0	0	0	0	0	-7.23442e-05	0	0	0	0	0	0	0	0	0	0	0	0	0	0	0	0	0	0	0	0	0	0	0	0	0	0	0	0	0	0
ERVL_14q22.1	0	0	-4.17791	-7.06447	0	-0.367618	0	-3.84479	-2.39275	-0.588063	0	0	-4.86121	0	-2.72695	-3.69396	-6.30953	0	0	0	0	-7.71728	-6.96172	-4.79143	0	0	-6.71979	-4.19113	0	-4.11778	0	-4.44507	-8.1806	0	-7.54979	-1.77157	-4.36554	-5.73724	0	0	0	-7.74164	-8.74092	-5.39532	0	0	-7.79198	-9.79544	-4.98153
ERVL_16p12.3	0	14.8982	0	-27.8073	0	0	0	-24.0063	0	-3.05385	-18.5731	-10.6732	-40.2098	0	0	-24.7941	-49.155	12.7477	-12.9982	0	0	-24.6782	-35.5779	-22.4575	-25.8487	11.1584	-36.8288	-32.274	-14.7715	-25.0182	-16.3803	-36.3102	-25.4377	0	-34.5982	-8.37649	-16.5077	-34.1883	8.88619	12.5847	0	-27.4291	-28.9806	0	22.6116	17.9867	-44.6693	-44.1645	-35.0464
ERVL_1q44b	-2.05526	6.69099	-11.4419	-28.0429	0	0	-23.4813	-24.1655	11.5821	0	-16.5626	-7.39742	-31.2768	0	-12.6787	-19.5171	-42.34	11.6448	0	6.95117	-7.19295	-20.0155	-24.1814	-19.2429	-26.1081	5.32774	-34.9072	-22.5196	-13.9467	-21.8426	-14.6941	-24.6764	-19.5154	0	-39.0003	0	0	-23.9806	0	0	-14.6152	-17.2422	-24.5897	-11.4275	0	12.3553	-35.8605	-33.9017	-30.565
ERVL_22q12.3b	-3.74773	23.6177	-24.1459	-59.7604	-10.716	14.2907	-32.5397	-51.2647	24.9924	-3.6215	-36.0349	-45.1995	-80.0095	24.0729	-27.1247	-54.7545	-105.482	14.8523	-10.0518	8.99361	-18.4702	-69.8766	-94.6451	-61.5843	-53.4704	6.68413	-97.0161	-77.2771	-39.75	-76.5748	-31.4469	-76.8664	-56.8054	-5.81065	-75.6469	0	-30.5862	-81.5579	6.42216	10.9513	-32.1388	-77.3019	-68.6942	-39.2058	42.1571	27.9899	-121.886	-82.2992	-82.9485
ERVL_2q24.1a	0	0	0	0	0	0.252956	0	-2.33876	0	0	0	0	-3.11476	0	0	-3.27694	-2.40792	0	0	0	0	0	-2.49066	-1.33909	-2.59822	0.481479	0	-2.51244	-2.27835	-1.96252	-2.56394	-2.34732	0.718395	0	-3.71212	0	0	-3.6444	0	0	0	0	0	0	0	0	-3.53713	-2.47122	0
ERVL_6q16.1d	-0.276607	0	0	0	-3.92284	0	0	0	0	-0.0608146	0	-5.09117	0	0	0	0	0	0	-1.5627	0	0	0	0	0	0	0	0	0	0	0	0	-8.09483	0	0	0	0	0	0	0	0	0	0	0	0	0	0	0	0	0
ERVL_8p23.1	0	0	0	0	0	0	0	-5.67962	0	0	0	0	0	0	0	0	-12.1883	0	0	5.31128	-4.19951	-10.0822	-7.25429	-6.57611	-6.97014	0	-16.8006	-4.48757	0	-5.8022	0	-5.09524	-9.11942	0	-11.6597	0	0	-8.09546	0.118062	-3.63753	-3.88358	0	-11.8229	-6.67143	8.52745	10.9008	-12.9832	0	-11.2605
ERVL_Xp11.21a	0	0	0	0	-0.206659	0	0	0	0	0	0	0	0	0	0	0	-7.15516	0	-5.28345	0	0	-7.91447	0	0	0	0	-10.6766	0	0	0	0	0	-4.25704	-0.386746	-6.48722	-3.47546	0	0	0	0	0	0	0	0	0	2.3404	0	0	-9.67251
ERVL_Xq28b	0	0	0	0	0	0	0	0	0	0	0	1.43732	0	0	0	2.85199	0	0	0	0	-2.30908	0	0	0	0	0	0	0	2.44565	0	0	0	0	0	0	0	0	0	0	0	0	0	0	0	0	0	0	0	0
ERVLB4_10p14	-5.19664	20.1112	0	-38.4041	-11.6372	20.7717	0	-27.4644	26.6176	-3.56571	0	-22.6997	-51.5231	25.895	0	-27.0921	-63.8593	22.4908	-8.92268	11.478	0	-37.2163	-54.6252	-34.2103	-28.3833	14.6771	-55.0079	-49.3914	-21.5784	-40.3855	0	-52.476	-32.5016	0	-48.536	-8.98238	-23.7275	-39.0613	10.5844	13.8813	0	-36.2061	-33.8839	-17.2994	24.978	25.134	-71.4542	-50.7973	-44.981
ERVLB4_10q22.3a	-2.08853	0	-8.72912	-19.7842	0	0	-13.9877	-16.2892	0	0	-12.4197	-6.79927	-16.9295	0	0	-9.82218	-26.5012	6.89738	0	6.40675	-2.38127	-11.6327	-22.2695	-14.7523	-14.8016	5.31938	-12.3695	-16.4801	-10.1432	-17.1036	-9.74054	-20.1203	-10.0688	-1.99761	-22.2257	0	0	-20.4436	0	12.5764	0	-14.7109	-12.5424	-8.59415	0	12.3521	-24.031	-24.4692	-11.4903
ERVLB4_11p15.5c	-4.27506	33.9557	0	-44.4124	-11.3304	20.1945	-33.7462	-43.4203	33.8042	0	-29.0619	-39.0731	-69.3793	30.0533	0	-37.403	-87.887	18.683	-11.0532	13.0985	-12.048	-60.1691	-79.569	-65.6831	-43.9797	14.6171	-81.0918	-69.6106	-25.256	-67.5395	0	-69.0865	-52.8709	-3.75471	-64.4389	-7.04464	-28.9698	-75.0019	9.64686	20.0572	0	-78.7457	-53.8619	-36.3729	33.052	27.3301	-108.204	-76.4286	-75.1147
ERVLB4_11p15.5d	-3.11763	15.3265	-12.6021	-29.9802	-9.08903	10.6231	-23.3373	-31.0273	20.7118	-1.71278	-29.0234	-8.99508	-41.9786	21.7188	0	-24.5666	-70.6122	21.0014	-10.6918	10.016	-12.1	-42.7338	-41.9053	-36.127	-36.8133	12.2374	-61.5252	-37.8302	-14.2401	-36.7959	-15.9108	-41.7827	-38.3287	-3.1224	-57.7554	-6.31806	-21.1179	-40.6672	10.8535	16.6916	0	-35.7185	-42.9478	-24.2001	18.7427	21.2919	-69.8483	-59.4713	-60.1598
ERVLB4_11p15.5e	-5.3746	25.1661	-18.4109	-53.449	-12.7655	26.1198	-24.4424	-43.7245	38.9648	-3.95109	-29.766	-35.019	-72.7347	38.3308	0	-47.8361	-92.7106	25.719	-13.1858	14.1332	0	-58.7372	-83.8976	-52.5311	-43.6986	16.6386	-73.2006	-69.8401	-29.9678	-52.8439	-22.6297	-66.8077	-46.9592	0	-55.9178	-8.60551	-26.3607	-69.9393	12.5994	18.781	-25.1377	-71.4036	-56.0093	-30.0544	30.0214	33.8005	-100.729	-74.4923	-59.9798
ERVLB4_12p13.2a	0	0	0	0	0	0	0	0	0	-0.0199317	0	0	0	0	0	0	0	0	0	0	0	0	0	0	0	0	0	0	0	0	0	0	0	0	0	0	0	0	0	0	0	0	0	0	0	0	0	0	0
ERVLB4_12q13.13	0	0	0	0	0	0	0	0	0	0.00098677	0	0	0	0	0	0	0	0	0	0	0	0	0	0	0	0	0	0	0	0	0	0	0	0	0	0	0	0	0	0	0	0	0	0	0	0	0	0	0
ERVLB4_12q21.1a	0	10.92	0	0	0	16.4418	0	-9.6155	15.273	0	-10.7329	0	-12.8327	9.45649	-7.2088	0	-10.1133	3.49618	0	0	0	0	-8.6989	-12.6024	-7.75022	2.7371	0	-7.19504	0	-8.39533	0	-10.9028	0	0	-8.84253	0	0	-17.4288	0	0	0	-10.2543	0	-9.13436	0	1.86515	-13.1668	-11.5987	0
ERVLB4_13q12.12a	-1.57675	0	-5.25856	-9.01517	-4.60159	0	-9.51533	-15.5266	0	-1.09802	-12.621	0	-19.378	0	-10.644	-9.86759	-31.2723	0	0	0	-5.52549	-15.3694	-14.9375	-16.904	-17.8505	0	-29.6627	-12.2678	-5.25205	-14.601	-6.41746	-12.1824	-14.0571	-1.681	-25.2163	0	-11.7522	-17.2763	0	0	0	-13.0434	-17.6851	-9.03128	0	0	-32.3259	-24.8828	-29.4453
ERVLB4_13q14.11a	0	0	-4.16826	-6.95465	0	0	-7.81713	-3.24384	0	0	0	0	0	0	0	0	-5.48035	0	0	0	-5.02981	-3.53273	-3.25223	0	-4.60875	0	-7.40612	-2.92859	-4.61874	-3.96855	-2.81959	0	0	0	-7.23419	0	0	0	0	0	-2.93753	0	-6.34964	0	0	0	-6.58576	0	-6.4715
ERVLB4_13q34b	-3.11829	10.07	-15.9159	-39.3045	0	14.5425	-26.5169	-33.8463	0	-3.1567	-32.7698	-17.5467	-44.7519	0	-20.9892	-28.0325	-64.7227	0	0	6.72122	0	-36.1439	-47.8109	-35.777	-34.4067	8.26984	-42.5092	-41.3171	-18.6643	-39.4134	-21.6808	-46.8024	-29.6517	0	-51.4673	-6.14433	-22.5979	-46.5005	5.90099	10.156	-20.8224	-39.4959	-36.4421	-26.0578	0	16.1046	-62.1857	-56.0264	-39.2325
ERVLB4_14q23.3	0	0	-7.95106	-13.9352	0	0	-10.7715	-26.2652	0	0	-22.9596	0	-28.2941	0	-16.722	-12.5554	-36.1952	0	-7.34541	6.9773	-10.8781	-25.8206	-18.2658	-25.8801	-26.0789	0	-41.18	-15.4402	-9.21593	-22.6566	-11.4445	-18.3493	-19.639	-1.79356	-38.4754	-2.92702	0	-30.8599	2.56025	0	0	-16.1634	-22.6103	-13.3826	15.8324	11.1812	-39.8462	-31.615	-39.3586
ERVLB4_15q13.3a	0	0	0	-8.92713	0	0	0	-15.6062	0	0	0	-11.9243	-11.5795	0	-9.62807	-8.40762	0	0	0	0	8.44538	0	0	-16.3639	0	0	0	0	-7.036	-10.9031	0	-11.04	0	0	0	0	-13.2516	-18.8554	0	0	-9.88706	-18.131	0	0	0	0	0	-20.801	0
ERVLB4_15q21.2	0	0	0	-18.2458	0	0	0	-14.4741	0	0	-12.9018	0	-23.6009	6.84411	0	-15.5662	-34.6041	0	-4.4551	0	-13.7691	-21.4331	-19.834	0	-16.2439	0	-39.0009	-19.2044	0	-17.5731	-9.89279	-14.1752	-17.4346	0	-34.4079	-5.23566	0	-16.2922	0	0	0	-11.464	-24.5787	-8.48658	0	5.93395	-34.4956	-27.3473	-36.444
ERVLB4_15q23a	0	0	0	0	-2.24395	0	0	0	0	0	0	-3.23317	-6.30862	0	0	0	-10.4734	0	0	0	0	-7.61109	-5.44049	-11.6278	0	0	-14.5921	0	0	0	0	-4.92084	0	0	-8.18056	0	0	-10.2461	0	0	0	-9.7385	-6.24986	0	0	0	-10.4556	-7.21726	-9.15946
ERVLB4_15q25.3a	-2.30349	0	0	-20.3138	0	0	0	-14.4683	0	-1.56175	0	-19.4987	-33.782	0	0	-24.7801	-36.938	0	0	7.04198	0	-19.57	-35.7697	-16.919	-16.6153	7.70889	-27.2649	-33.2007	-15.8945	-22.7786	0	-31.8428	-13.6922	0	-21.535	0	0	-23.7726	0	0	0	-26.3057	-19.3643	0	0	15.3617	-39.6783	-22.6389	0
ERVLB4_16p13.3a	-1.70968	0	0	0	0	3.78817	0	-9.36389	11.6452	0	-9.32422	0	-6.95593	12.1203	-8.86944	0	-16.9558	6.41334	0	4.03221	-8.11319	-12.7876	-7.97372	-11.5701	-11.4032	0	-26.5568	0	0	-8.1517	0	-9.766	-10.7015	0	-15.2372	0	0	-12.332	0	0	0	0	-14.7058	-8.663	0	5.10659	-20.8971	-12.7718	-23.9475
ERVLB4_17q21.32	-4.58454	30.4798	0	-38.6516	-12.0783	15.1578	0	-44.3258	17.1379	0	-33.1304	-39.6806	-76.0592	0	0	-42.3507	-90.579	13.58	-9.89188	0	0	-53.8844	-77.2547	-66.1701	-47.824	10.548	-77.7829	-69.9829	-32.4154	-71.0707	0	-71.406	-48.1769	-3.31401	-75.2916	-8.68842	0	-79.8661	3.61964	19.8884	0	-75.7604	-46.7412	-32.6932	25.1678	19.4193	-109.298	-79.5194	-65.5136
ERVLB4_17q24.3	-2.99019	0	-17.2894	-19.7874	-7.57409	0	0	-24.1785	8.42138	0	-20.8266	-11.4775	-29.5461	0	0	-20.7659	-31.8936	0	-4.01529	0	0	-22.9827	-28.6179	-19.8578	-17.7273	0	-23.4525	-17.6776	-13.3885	-20.383	-18.3593	-27.836	-18.9126	0	-38.0274	-4.02869	-27.0164	-28.3325	0	0	-13.3582	-24.7134	-31.888	-14.5281	0	8.87145	-31.1284	-40.426	0
ERVLB4_17q25.1	0	28.0978	-18.0938	-38.4539	0	12.199	0	-34.0464	15.6147	0	0	-37.6305	-57.946	0	-21.3073	-34.2442	-54.1482	7.51175	-7.69662	0	11.2471	-24.5335	-62.4168	-47.9531	-28.8735	6.89485	0	-63.3195	-30.556	-54.2233	0	-51.0175	-26.9609	0	-48.6747	-7.40401	0	-63.829	2.88519	0	0	-62.6272	0	-22.6726	19.8613	13.2263	-77.2957	-58.7447	0
ERVLB4_17q25.3b	-1.52143	0	0	0	-1.80418	0	0	0	0	-0.294295	0	0	0	0	0	0	0	0	0	0	0	0	0	0	0	0	0	0	0	0	0	0	0	-1.09756	0	0	0	0	0	0	0	0	0	0	0	0	0	0	0
ERVLB4_18q22.2	0	0	0	0	0	0	0	0	-2.09097	0	0	-5.27272	0	0	0	0	0	0	-5.06174	0	0	0	0	0	0	0	0	0	-8.42792	0	0	0	0	0	0	-3.34707	0	0	0.301395	0	0	0	0	0	0	5.19712	0	0	0
ERVLB4_19q13.12	-1.94889	4.42384	-13.4187	-22.0286	-5.90352	4.53527	-26.3279	-29.1608	10.1833	0	-22.892	0	-35.7406	9.48484	-20.9857	-13.1691	-54.3287	11.8857	0	4.07279	-14.8335	-28.5556	-22.0167	-26.5189	-34.9509	0	-60.0342	-21.0296	-10.0424	-28.604	-18.1573	-24.7871	-21.795	0	-51.7609	0	-11.6165	-28.2748	0	6.20074	-9.05088	-14.0178	-29.0019	-16.7837	10.5835	8.73765	-57.3919	-43.4326	-54.3093
ERVLB4_1p22.3c	-2.0378	0	-8.42918	-18.8414	0	0	0	-14.4486	10.2333	0	0	-18.2832	-31.0127	0	-12.2605	-25.6841	-35.4276	0	-8.2529	5.24357	0	-23.5153	-35.2364	-15.3619	-15.8412	0	-30.3701	-34.4264	-18.7572	-25.3619	-9.74559	-27.7525	-17.6228	0	-23.0999	-5.49518	0	-20.496	4.36668	0	-13.3112	-27.5773	-22.9856	0	0	15.9173	-42.8391	-27.5173	-25.0465
ERVLB4_1p34.1	-2.12846	0	0	-5.93715	-2.10898	0	-8.39236	0	0	0	0	0	0	0	0	0	0	0	0	0	0	0	0	0	0	0	0	0	0	0	0	0	0	-2.10397	0	0	0	0	0	0	-3.64642	0	0	0	0	0	0	0	0
ERVLB4_1p36.11	0	-3.45604	0	0	0	-1.21068	0	0	-2.68623	0	0	0	0	0	0	0	0	0	-4.75469	0	-8.13357	0	0	0	0	0	-19.4385	-9.63584	0	0	0	0	0	0	0	-3.10969	0	0	0	0	0	0	0	0	0	0	0	0	0
ERVLB4_1q23.1a	0	0	-12.0559	-28.3569	0	0	0	-21.2846	0	0	0	-17.2929	-36.3377	0	-20.7655	-22.5933	-41.406	0	-6.73031	0	-8.80941	-32.0556	-43.1924	-26.0314	-18.9115	0	-40.2887	-35.9674	-16.7336	-34.0079	-13.3423	-30.2061	-23.6414	0	-37.8002	-4.98715	0	-34.5127	1.64208	0	0	-28.9598	-32.5517	-18.5312	22.7826	12.078	-48.3992	-34.1685	-30.0522
ERVLB4_1q24.3	0	0.0316612	0	0	0	0	0	0	0	0	0	0	0	0	0	0	0	0	-2.80952	0	1.49271	0	0	0	0	0	0	0	0	0	0	0	0	0	0	0	0	0	0.0564592	0	0	0	0	0	0	3.93695	0	0	0
ERVLB4_21q22.2	0	0	-6.01976	-9.06243	0	0	0	-7.97965	0	0	0	0	0	0	-6.24031	0	0	-0.104352	0	0	0	0	-10.734	0	-7.83364	0	0	-8.65334	-6.62662	-8.51046	-7.71648	-8.07324	0	0	-11.9047	0	0	-8.00245	0	0	0	0	0	0	0	0	0	0	0
ERVLB4_22q11.1b	-0.369092	0	0	0	0	8.55808	0	-8.73963	0	0	0	-8.6963	-14.8463	0	0	-8.0964	-18.4233	0	0	0	0	0	-11.1054	-13.1323	-9.40344	0	-11.159	-8.08356	-5.33356	-8.43	0	-13.6878	0	0	0	0	0	-17.5321	0	0	-5.98565	-12.5303	0	0	0	0	-15.4188	0	0
ERVLB4_22q13.31b	0	0	0	-33.2738	0	0	-19.759	-29.8219	0	0	-18.553	-20.5514	-42.672	17.1751	0	-30.2372	-56.826	0	-9.89542	0	0	-38.928	-49.7667	-26.8065	-30.7086	6.78437	-50.1389	-37.4941	-20.5658	-37.0723	-20.9492	-40.2479	-30.2337	0	-44.402	-5.98757	-20.8723	-36.2775	7.73731	0	-16.5921	-31.1566	-34.34	-20.2023	26.5236	19.8049	-55.6529	-44.5054	-39.3732
ERVLB4_2p16.3	0	0	0	0	0	0	0	0	0	0	0	0	0	-0.748315	0	1.77118	0	0	0	0	0	0	0	0	0	0	0	0	-1.12299	0	0	0	0	0	0	0	0	0	0	0	0	0	0	0	0	0	0	0	1.88584
ERVLB4_2p25.3	-0.109854	0	0	0	0	0	0	0	0	-0.0357207	0	0	0	0	0	0	0	0	-0.484032	0	0	0	0	0	0	0	0	0	0	0	0	0	0	0	0	-2.02631	0	0	0	0	0	0	0	0	0	0	0	0	0
ERVLB4_2q11.2	-2.35298	0	-8.1166	-17.3189	0	0	0	-12.1755	0	-1.34615	-10.0655	0	-18.7118	0	0	-16.1272	-20.9148	0	-3.78748	0	0	0	-18.643	-7.4232	-11.3394	0	0	-17.3832	-8.57542	-13.0102	-11.839	-17.5813	0	-1.55379	-20.5162	0	0	-14.6427	0	0	0	-10.2923	0	0	0	0	-17.7155	-19.977	0
ERVLB4_2q13c	-3.7401	5.63763	-15.9898	-21.7927	-3.94179	0	-35.4024	-31.3048	9.24939	0	-22.0233	-10.1529	-33.438	0	-18.994	-15.8084	-51.4673	6.99636	-2.56453	8.64644	-10.2249	-30.7221	-30.1707	-33.526	-36.6759	0	-55.6787	-21.2673	-13.164	-27.7281	-22.5828	-32.1434	-25.4282	-3.65407	-44.9558	0	-16.6145	-36.8758	0	0	-24.481	-29.2675	-37.4575	-21.3756	20.2499	15.2785	-54.6164	-45.1117	-49.0682
ERVLB4_2q14.2b	0	0	0	0	0	0	0	0	0	-2.30694	0	0	0	0	0	0	0	0.881257	0	0	0	0	0	0	0	0	0	0	0	0	0	0	0	0	0	0	0	0	0	0	0	0	0	0	0	0	0	0	0
ERVLB4_2q21.1c	0	0	0	0	0	0	0	0	0	0	0	0	0	0	0	0	0	3.67962	0	5.23011	0	0	0	0	0	3.93326	0	0	0	0	0	0	0	0	0	0	5.41522	0	0	6.67778	0	0	0	0	0	0	0	0	0
ERVLB4_2q32.3	-3.32625	0	0	-28.999	0	0	0	-31.6911	0	-2.69706	-30.7382	-18.5641	-53.4617	0	0	-33.3577	-71.4268	13.6611	-9.90798	0	-12.71	-40.3559	-55.3129	-38.2275	-33.185	8.2422	-59.3517	-45.5376	-16.1245	-39.3324	-20.4316	-50.492	-32.3566	-1.71689	-53.1604	-6.88601	-23.5632	-51.0964	4.87233	0	-12.6092	-42.8627	-45.5609	-19.3677	0	0	-77.5169	-56.1988	-52.2455
ERVLB4_3p14.2	-3.58721	0	0	0	-5.61228	0	0	0	0	-0.919027	0	0	0	0	0	0	0	0	0	0	0	0	0	0	0	0	0	0	0	0	0	0	0	-3.2298	0	0	0	0	0	0	0	0	0	0	0	0	0	0	0
ERVLB4_3q11.2f	0	0	0	5.7081	0	0	0	0	0	0	0	0	0	0	0	0	0	0	0	2.27831	0	0	0	0	0	2.38648	0	0	0	0	0	0	0	0	0	0	0	0	0	0	0	0	0	0	0	0	0	0	0
ERVLB4_3q22.1a	0	0	0	0	0	0	0	0	0	0	0	0	0	0	0	0	0	3.00741	0	0	1.09425	3.89004	0	0	0	2.63683	0	0	0	0	0	-5.26964	0	0	0	0	5.76476	0	0	5.60957	0	0	8.67518	0	0	0	0	0	0
ERVLB4_3q25.31a	-4.45273	9.73731	0	0	-8.05973	0	0	-17.3451	13.2363	-2.72607	0	-10.7691	-20.6929	0	0	0	-30.8282	13.6669	-4.03603	8.88955	0	-19.0885	-22.811	-21.1835	-16.82	9.1462	-34.6426	-19.7155	-10.886	-17.2324	0	-25.3114	-17.356	-2.55544	-25.6355	0	-15.8762	-24.5786	6.3112	9.86554	-15.7092	-22.1286	-28.989	0	0	16.5555	-36.5521	-33.2143	-26.9738
ERVLB4_3q29b	0	0	0	-17.4681	0	0	0	-17.4012	0	-1.80384	-18.8942	-10.8973	-27.6942	0	0	-20.8804	-40.1551	0	-10.6363	3.94992	0	-26.3136	-32.0618	-23.4207	-18.4628	8.24243	-22.5697	-27.822	0	-20.8825	-12.9225	-29.9749	-22.8186	0	-30.9809	-7.53703	-20.3574	-25.6019	0	0	0	-29.728	-25.8824	-18.6137	13.0578	10.0516	-36.4617	-34.8713	-21.187
ERVLB4_4q21.1a	0	0	0	0	0	0	0	0	0	0	0	0	0	0	0	0	0	0	0.266946	1.85187	0	0	0	0	0	0	0	0	0	0	0	0	0	0	0	0.391602	0	0	0	0	0	0	0	0	1.8895	0	0	0	0
ERVLB4_4q23b	0	17.0693	-20.4748	-49.0597	0	8.86882	-30.7756	-44.3854	27.6823	0	-37.6842	-23.4975	-67.8304	35.0919	-23.393	-41.3666	-106.29	16.6244	-7.06036	13.8013	-15.9514	-59.6106	-69.0588	-47.4385	-47.9065	7.15553	-89.2806	-57.5854	-21.3094	-47.2734	-25.7159	-54.4737	-52.8753	0	-69.2422	0	-34.8969	-56.971	6.31221	10.7258	-23.3637	-55.4481	-65.4933	-38.3462	28.6689	23.3525	-101.19	-72.0942	-79.453
ERVLB4_5q12.3a	-4.0848	0	-23.5819	-49.2209	0	9.48404	-31.7466	-41.1112	16.3969	-2.57572	-30.4062	-22.9846	-69.8391	17.1849	-20.1702	-53.2095	-96.1042	14.7615	-11.6404	10.3176	-16.1457	-50.6655	-71.711	-39.7434	-49.6646	8.02033	-84.9306	-59.6779	-28.7684	-47.6598	-29.8568	-54.257	-44.8837	-2.82646	-64.5723	-6.62185	-21.1838	-55.0492	8.69375	0	-27.6144	-45.4142	-59.8162	-29.9794	31.3333	30.4152	-104.251	-69.2266	-76.4755
ERVLB4_5q31.1	0	0	0	0	0	0	0	0	0	0	0	0	0	0	0	0	0	0	-1.56417	0	0	0	0	-10.1016	0	0	0	0	0	0	0	0	0	0	0	-4.02997	0	-9.58349	0	0	0	0	0	0	0	0	0	0	0
ERVLB4_6q16.1d	0	13.6258	0	-18.0829	0	0	-17.4846	-10.3374	20.3563	0	0	-13.5789	-17.0485	25.0787	0	-11.3622	-27.6175	16.4244	-5.70604	11.3475	0	-21.4351	-25.2939	-18.8275	-14.9082	9.43744	-30.645	-24.9795	-9.46082	-23.0283	0	-22.9556	-20.374	0	-27.8486	-5.6089	0	-17.4569	6.26881	13.3263	-11.9138	-24.7893	-20.0098	0	18.1504	20.1645	-34.2375	-28.3163	-30.3223
ERVLB4_6q27e	0	9.00654	0	0	0	7.4626	0	0	13.6313	0	0	0	-18.995	11.0326	0	0	0	10.2387	0	0	0	0	0	-24.4059	0	5.41497	-17.8221	-10.0627	0	0	0	-14.9157	0	0	0	-4.31556	0	-27.4372	3.82303	0	0	-23.041	-15.5891	0	8.92859	0	-17.1679	0	-15.841
ERVLB4_7p13	0	12.065	-11.9135	-33.8903	0	0	0	-26.5911	14.5507	0	-19.1672	-25.5973	-45.8463	15.4992	0	-30.759	-57.4905	9.44788	-8.0061	8.22206	0	-37.7056	-55.8639	-26.3516	-25.8414	2.92546	-48.9422	-45.3301	-22.6862	-37.1008	-19.7783	-41.9716	-26.9082	0	-41.0906	-4.64001	-19.8611	-37.6386	4.33498	6.58793	-16.8257	-42.6296	-36.2312	-21.6225	0	17.6096	-66.532	-43.6145	-38.4456
ERVLB4_7q22.3	-1.0975	0	0	0	-1.21131	0	0	0	0	-0.947967	0	0	-9.07759	0	0	0	-14.4269	0	-3.25438	0	0	0	0	-7.33174	0	0	-14.093	0	0	0	0	0	-6.58069	-0.976905	-11.5063	-1.88165	0	0	0	0	0	0	0	-5.51936	0	0	-14.9629	-10.1409	-12.5074
ERVLB4_7q36.1a	-3.63851	16.7144	-27.1942	-66.5082	0	12.6598	-39.1561	-56.6018	22.0473	-2.34569	-43.5913	-46.7561	-89.0213	19.4783	-37.2086	-59.5286	-116.522	16.586	-9.27829	14.7409	-18.2382	-71.4714	-100.269	-65.6873	-58.2808	0	-102.687	-83.3036	-45.257	-83.1331	-36.8928	-79.2698	-61.8902	-3.11257	-81.4349	-5.54287	-41.6355	-85.0132	0	0	-33.4471	-80.3545	-70.9456	-44.0016	38.4346	24.035	-131.517	-87.9112	-86.8921
ERVLB4_7q36.3a	-1.44107	0	0	0	0	-3.02816	0	0	0	-0.811095	0	0	0	0	10.0245	0	0	0	-3.14029	0	0	0	0	0	0	0	0	0	0	0	0	0	0	0	0	-3.82979	0	0	0	0	0	0	0	0	0	6.51592	0	0	0
ERVLB4_8p11.23b	0	8.08746	0	0	0	0	0	-9.93369	11.0976	0	0	-13.4231	-20.7017	10.749	0	-8.97996	-18.7374	6.33879	0	4.41327	5.61872	-10.5407	-23.2758	-11.9479	0	0	0	-20.9204	-12.0083	-18.6619	0	-22.4661	-12.8702	0	0	1.04484	0	-13.4656	2.25073	0	0	-22.9781	0	-9.49272	0	8.45077	-19.6374	-16.5611	0
ERVLB4_8p12a	0	7.84073	0	0	0	6.28228	0	0	12.3636	0	0	0	-8.91834	11.3028	0	0	-13.1574	1.15971	0	0	0	0	0	0	0	2.18672	0	0	0	0	0	0	0	0	0	0	0	-9.34713	0	0	0	0	0	0	0	0	0	0	0
ERVLB4_8p12b	0	0	0	0	0	0	0	0	0	0	0	0	0	0	0	0	0	0	0.00172485	0	0	0	0	0	0	0	0	0	0	0	0	0	0	0	0	0	0	0	0.0401436	0	0	0	0	0	0	0	0	0	0
ERVLB4_8p21.1c	-1.85527	0	0	0	-1.92495	0	0	0	0	0	0	2.69317	0	-1.65976	0	0	0	0	0	0	0	3.47735	0	0	0	0	0	0	3.48434	0	3.76017	0	0	-1.85831	0	0	0	0	0	0	0	0	0	0	0	0	0	0	0
ERVLB4_8p23.1k	-2.09116	0	0	-13.3255	0	0	0	0	0	0	0	0	0	0	0	0	0	0	0	0	9.93434	0	0	0	0	0	0	0	0	0	0	0	0	0	0	0	0	0	0	0	0	0	0	0	0	5.14111	0	0	0
ERVLB4_8q23.1e	-1.92534	0	-11.5056	-21.4266	0	0	0	-21.6639	8.33236	0	0	-5.95645	-27.3117	0	0	-16.9119	-35.5979	0	-6.28722	10.0307	0	-21.5401	-25.4674	-16.5	-23.3106	2.18649	-31.4199	-14.6346	-11.873	-18.1055	-12.0672	-22.0358	-14.0538	0	-30.8739	0	0	-25.0726	0	8.47649	-12.7971	-13.6575	-22.9123	0	15.0724	15.2085	-30.8217	-26.122	-28.532
ERVLB4_8q24.3d	0	17.0334	-15.6908	-26.8023	0	11.7367	-24.4822	-35.5427	13.8268	-4.10938	-28.543	-16.1554	-37.824	0	-23.9777	-20.1786	-59.3119	0	-6.17095	4.33099	0	-32.7086	-42.679	-47.7577	-30.5129	5.6787	-47.9144	-33.214	-10.6024	-34.1516	-15.3886	-26.5586	-32.5589	0	-41.8994	0	-18.6925	-55.9284	3.53371	0	-12.9958	-47.0644	-42.5759	-31.2496	19.307	11.5123	-66.2929	-55.4865	-41.1104
ERVLB4_9q22.2b	0	0	0	-10.054	-5.90843	0	0	-11.1819	0	0	-10.7164	-8.58866	-12.3617	0	-10.1638	0	-17.1766	0	0	0	0	-12.4097	-11.6521	-13.9711	-10.5919	0	-15.644	-8.58927	-5.32311	-12.4576	0	-9.87948	0	0	-16.6038	0	-11.3967	-14.3746	0	0	-7.15827	-17.1661	-10.8102	-10.2911	0	0	-19.2007	-18.8911	-16.336
ERVLB4_9q31.3	0	0	0	0	0	0	0	-16.4068	0	0	0	-9.57269	0	0	0	0	0	0	0	0	12.1866	0	0	-21.423	0	0	0	0	-8.41709	0	0	-13.5505	0	0	0	0	0	-24.0061	0	0	0	0	0	0	0	0	0	-21.2544	0
ERVLB4_Xp21.1e	0	0	-10.3401	-14.5095	0	4.56032	-18.7419	-20.9607	5.60198	0	-12.6518	-7.34984	-21.6917	0	-14.0097	-10.0305	-43.0727	5.46158	0	0	-10.3274	-32.4361	-24.6834	-26.5079	-23.0663	0	-48.5984	-19.5586	-6.5037	-21.3778	-12.539	-19.2878	-28.2856	0	-33.7575	0	-14.1776	-28.6614	0	0	-10.9443	-24.8292	-31.8695	-20.4108	14.4056	7.72975	-40.7686	-37.1068	-41.9944
ERVLB4_Xq21.2	0	0	0	0	0	0	0	0	0	0	0	0	0	0	0	0	0	0	-4.52193	0	0	0	0	0	0	6.4156	0	0	0	0	0	0	0	0	0	-4.41502	0	0	0	0	0	0	0	0	0	0	0	0	0
ERVLB4_Xq21.33a	-2.93431	10.063	0	-15.818	0	0	0	0	16.8729	-4.49188	0	0	0	0	0	-15.6356	0	0	-3.14164	8.48506	12.4245	0	0	0	0	7.4145	0	-15.8216	0	0	0	0	0	0	0	0	0	-17.1507	0	0	0	0	0	0	14.5036	12.2824	0	0	0
ERVLB4_Xq21.33b	-4.10584	0	0	-33.3262	0	0	0	0	0	-5.13405	0	-16.8779	-28.7112	0	0	-28.485	0	0	0	0	15.423	0	-29.6132	0	0	12.0149	0	-30.5919	-23.001	-18.4646	0	-30.0183	0	0	0	-6.47192	0	-17.8568	0	15.6854	0	0	0	0	0	17.6111	0	0	0
ERVLB4_Xq21.33c	-2.81295	0	0	-33.8724	0	0	0	-16.3369	0	0	0	-10.9978	-30.1689	0	-17.9929	-35.0129	0	0	-5.49588	0	0	0	-29.6233	0	0	5.66235	0	-33.9949	-19.3888	0	-15.2193	-21.4031	0	0	0	-6.53085	0	-22.4337	0	0	0	0	0	0	0	13.3966	-28.998	0	0
ERVLE_10p13a	0	4.57195	0	0	0	0	0	-5.84524	6.65093	0	-5.47323	-6.56931	-9.65123	7.9792	0	-8.87143	-13.9601	0	-6.28026	3.6794	0	-9.0388	-10.3139	-7.31769	-6.81847	0.542318	0	-9.48571	0	-6.82922	0	-10.4819	-6.25542	0	0	-3.52565	0	-8.04977	5.41328	0	0	-10.6904	0	0	17.444	6.40761	-12.8592	-10.7861	-8.49184
ERVLE_11p15.4f	0	0	5.67419	0	0	0	0	0	0	0	0	0	0	0	0	0	0	3.9902	-3.91799	0	4.4641	0	0	0	0	4.54425	0	0	4.8781	0	0	0	0	0	0	0	0	0	0	8.97472	0	0	0	0	0	0	0	0	0
ERVLE_11p15.5a	0	0	0	-8.23988	0	0	0	-6.06293	0	0	-6.03316	0	-10.6792	0	-6.64814	-5.84896	-17.0256	0	0	0	0	-5.17847	-7.08205	-16.5565	-4.21645	0	-13.3052	-6.65409	0	0	0	-4.42444	-3.844	0	-8.30292	-2.69052	0	-20.1472	0	0	-4.00807	-12.9278	-6.41755	-5.70568	0	0	-10.6181	-7.22222	-5.51503
ERVLE_11q13.4a	0	0	0	0	-1.98101	0	0	0	0	-0.940334	0	0	0	0	0	0	0	0	0	0	0	0	0	0	0	-0.438322	0	0	0	0	0	0	0	-1.6393	0	0	0	0	0	0	0	0	0	0	0	0	0	0	0
ERVLE_11q13.5a	0	0.263546	0	0	0	0	0	0	0	0	0	0	0	0	0	0	0	0	0	0	17.4728	0	0	0	0	0	23.4387	0	0	0	0	0	0	0	0	0	0	0	0.294534	0	0	0	0	0	0	0	0	0	28.1233
ERVLE_11q23.3c	0	24.0811	-16.2868	-30.7309	-9.87858	14.0641	0	-39.1481	12.3579	0	-32.2515	-34.117	-70.3038	0	-22.0579	-38.5202	-78.2542	8.87778	-11.2558	0	0	-48.883	-71.6731	-57.8739	-37.5413	11.8167	-70.8041	-58.8814	-23.5816	-57.1425	-18.6618	-63.9727	-41.1413	0	-61.609	-7.1703	-22.2879	-67.3035	5.70989	0	-16.3684	-67.1362	-52.7611	-34.57	14.5049	17.2197	-95.9792	-70.6481	-55.916
ERVLE_11q23.3d	-4.86999	0	0	-25.3839	-6.90325	0	-22.1514	-23.3357	14.6382	-3.39838	0	0	-35.0019	0	0	-18.2029	-37.1833	16.8852	-5.333	10.024	0	-18.6164	-25.168	-20.7494	-26.1703	5.98143	-27.6175	-21.9342	-11.8352	-21.0083	-16.4227	-25.6025	-16.8091	0	-39.2135	0	0	-26.9861	0	0	0	0	0	0	22.607	18.7462	-37.5732	-36.4779	-24.5721
ERVLE_11q23.3e	-1.16652	2.00238	0	-12.1488	0	3.6778	-13.6779	-5.3663	9.28732	0	-7.18977	0	-9.50172	0	0	-6.97186	-11.3907	5.12468	0	1.34453	-3.59536	-5.734	-8.2433	0	-6.66291	0	-10.2822	-6.44874	0	-8.40484	-5.83328	-9.52247	0	0	-11.1622	0	0	-4.68211	0	0	0	0	-6.72504	0	0	0	-11.1973	-9.68833	-8.32614
ERVLE_11q24.2a	-5.27465	11.2493	-26.3512	-62.3219	-9.42786	0	-35.9829	-53.711	20.3699	-3.02781	-43.7994	-31.0816	-72.9113	26.6711	-30.2472	-56.7653	-107.874	18.5585	-10.6142	13.5141	-11.0658	-66.6314	-82.866	-56.8303	-55.5928	8.37674	-87.3496	-68.5288	-31.6846	-60.7977	-36.9362	-66.0775	-52.7619	-4.54162	-78.0394	-8.6985	-42.6438	-74.1634	9.94682	0	-33.7471	-69.4095	-68.8879	-36.9493	29.4998	27.3819	-110.723	-89.0346	-75.8161
ERVLE_11q24.3d	0	1.58696	0	-7.8733	0	4.63363	0	-7.5624	0	0	0	0	-8.69718	0	0	0	0	0	0	0	0	0	0	0	0	0	0	0	0	0	0	0	0	0	0	0	0	-10.1522	0	0	0	0	0	0	0	0	0	0	0
ERVLE_11q24.3e	0	0	0	0	0	5.23769	0	0	5.34425	0	0	0	0	0	0	0	0	0	0	0	0	0	0	0	0	0	0	0	0	0	0	-6.47454	0	0	0	0	0	0	0	0	0	0	0	0	0	0	-10.1539	0	0
ERVLE_12p11.23	-2.14715	0	-23.7631	-44.4798	0	6.72787	-29.918	-57.8468	13.9172	0	-44.9321	-38.671	-82.2779	14.6524	-39.8162	-52.272	-118.486	6.83386	-9.26724	4.80023	-13.9645	-73.2152	-89.327	-66.0806	-53.283	0	-102.978	-74.0412	-28.3733	-65.5432	-32.1024	-63.6247	-57.8346	0	-82.3048	-5.21495	-34.4239	-74.0615	0	0	-27.723	-73.7306	-71.846	-47.6965	21.1956	16.1836	-123.576	-92.1009	-83.0803
ERVLE_12p13.1b	0	0	0	-5.37497	0	0	0	0	0	-2.63092	0	-4.26979	-7.94617	0	0	-4.34146	-12.8688	0	0	0	-3.35084	-7.02442	-7.20769	0	-5.44685	0	-12.8512	-6.67671	0	0	0	0	-6.14887	0	0	0	0	0	0	0	-5.2944	-6.60541	0	0	0	0	-14.0695	-5.95589	-12.1235
ERVLE_12p13.31c	0	0	0	0	0	0	0	0	0	0	0	0	0	0	0	0	0	0	-0.0022853	0	0	0	0	0	0	-0.0226708	0	0	0.191885	0	-0.54749	0	0	0	0	0	0	0	-0.00172481	0	0	0	0	0	0	0	0	0	0
ERVLE_12q13.11b	-3.47105	8.43429	-10.8652	-24.8608	0	18.2269	-17.8046	-22.9121	13.6595	-2.30012	-20.8288	-7.67633	-26.1318	9.18327	0	-15.6476	-43.4537	14.1393	0	8.1615	0	-27.3918	-31.7607	-22.612	-23.1779	7.70638	-34.3571	-25.2797	-10.2161	-21.9756	-16.004	-25.4078	-22.3164	0	-33.7649	0	-17.2188	-28.302	0	9.24605	-12.7557	-24.9735	-29.9004	-18.5832	17.8151	15.583	-39.802	-37.4777	-33.5094
ERVLE_12q14.3a	0	0	-8.8512	-13.355	0	0	0	-14.226	0	0	0	-9.31916	-23.3642	0	-9.69274	-15.6499	-24.8325	0	0	2.53125	-4.34016	-13.3367	-19.8033	-13.0435	-14.9221	0	-21.0905	-18.5437	-12.1961	-16.4441	-8.50604	-15.5975	-12.5881	0	-18.8801	0	0	-19.0847	0	0	-8.55809	-18.6119	-13.6373	0	8.58683	7.81242	-27.1134	-20.2047	-18.9904
ERVLE_12q22	0	0	0	0	0	0	0	0	0	0	0	0	0	0	0	0	0	0	-1.81393	0	0	0	3.24716	0	0	0	0	3.26951	0	0	0	0	0	0	0	0	0	2.88484	0	0	0	2.24506	0	0	0	0	0	0	0
ERVLE_13q12.11	0	0	0	-11.47	-7.25409	0	0	-16.9986	4.38025	0	0	-11.3886	-20.3306	0	-15.5096	0	0	0	-3.75803	0	0	-16.5246	-19.9772	-25.1338	-16.1323	0	-30.2295	-18.3534	-9.70448	-23.6746	0	-20.4673	-15.6099	0	-24.8468	0	0	-28.7548	0	0	0	-22.5254	0	0	0	0	-37.1177	-25.9179	-24.1841
ERVLE_13q33.3d	0	0	0	0	0	0	0	0	0	0	0	0	0	0	0	0	0	0	0	0	0	0	0	-8.43786	-5.33434	0.752581	-14.0716	0	0	0	0	0	0	0	0	0	0	-8.80936	0	3.78982	0	-8.69545	0	0	0	0	-10.8177	0	-8.56853
ERVLE_14q12b	0	2.57608	-5.80859	-5.19692	0	0	-10.2865	-8.55916	0	0	-11.4864	-5.36885	-13.1026	0	-5.3397	-5.67217	-18.2863	0	0	0	0	-16.2441	-13.1281	-11.076	-7.58136	0	-18.827	-10.2184	-4.36091	-9.72573	-7.10985	-10.2944	-12.1708	0	-14.1994	-2.19541	-7.61085	-9.9598	0	0	0	-13.5188	-16.3802	-14.0048	0	0	-21.8134	-19.3147	-18.1963
ERVLE_14q12m	0.0474182	0	0	0	0	0	0	0	0	0	0	0	2.38006	0	0	0	0	0	-0.695421	-0.209914	0	0	0	0	0	0	0	0	0	0	0	0	0	0	0	-0.82709	0	0	0	0	0	2.80866	0	0	0	0	0	0	0
ERVLE_14q21.3e	-4.07452	0	-6.51749	-9.79662	-6.99871	0	-15.6853	-15.5289	0	-0.929873	-18.1079	0	-22.7487	0	-16.5203	-9.21091	-31.0741	0	-1.12906	0	-5.74098	-17.3326	-16.8274	-24.4837	-21.7018	0	-30.161	-11.4759	0	-16.3318	-11.1568	-22.5502	-13.8097	-3.90463	-24.6177	0	-10.6505	-19.2325	0	0	-15.4091	-18.6475	-19.2497	-14.6381	0	5.34725	-32.4964	-25.6939	-28.01
ERVLE_14q31.3e	0	0	0	0	0	0	0	0	2.61776	0	0	0	0	2.33409	0	0	0	0	0	0	0	0	0	0	0	0	0	0	0	0	0	0	0	0	0	0	0	0	0	0	0	0	0	0	0	0	0	0	0
ERVLE_14q32.2a	0	0	0	0	-0.355039	0	0	-0.0174296	0	0	-0.0659215	0	0	0	0.142385	0	0	0	0	0	0.0140838	-0.0787082	0	-0.0410385	-0.234073	0	-0.128576	0	0	-1.08098	0	0	0	-0.354215	-0.545389	0	0	0	0	0	0	-1.34601	0	0.164156	0	0	0	0	-1.25938
ERVLE_15q15.1	0	0	0	0	0	0	0	0	0	0	0	0	-6.04288	0	0	0	-10.3317	0.254752	0	0	-4.16533	-5.63187	-7.31837	0	-5.45053	0.893801	-8.44098	-5.17366	0	-5.03184	0	0	-4.43954	0	-8.06297	0	0	-6.6812	0	0	0	0	-7.34313	-3.41602	-0.966219	0	-8.85455	0	-8.10403
ERVLE_15q21.2	0	0	0	0	-8.04806	0	0	0	0	0	0	0	0	0	0	0	0	0	0	0	0	0	0	0	0	0	0	0	0	0	0	0	0	0	0	0	0	0	0	0	0	9.16524	0	0	0	0	0	0	0
ERVLE_15q24.3d	0	0	-7.53499	0	0	0	0	-13.0675	0	0	-10.5117	-7.54643	-15.2171	0	0	-11.9573	-32.6	2.16682	-5.79053	3.26424	0	-19.6465	-16.5594	-15.082	-14.79	0	-30.1045	-12.7647	-7.33026	-9.58864	-10.4147	-14.5365	-17.197	0	-15.6135	-3.76661	-9.00776	-17.1315	0	0	-11.8727	-18.8977	-19.3016	-14.4578	15.9638	10.9735	-27.9829	-24.505	-22.3019
ERVLE_15q25.1a	0	0	-15.7345	-17.9566	2.64544	0	0	-24.8329	4.53876	0	-20.2912	-5.85215	-36.1148	7.2734	-18.7824	-25.4964	-45.074	4.32216	-2.6841	5.67935	-10.6074	-21.1835	-25.2955	-15.7073	-30.1516	0	-39.6896	-22.2149	-16.2852	-21.8092	-21.3819	-21.8064	-14.0068	0	-34.8325	-2.42663	0	-27.6238	0	0	-10.9082	0	-21.48	-10.3186	12.215	14.8811	-43.1545	-28.8028	-31.9755
ERVLE_15q25.1f	-5.56279	26.2816	-27.3073	-63.6808	-12.8785	24.1563	-38.4534	-54.2052	27.6298	-3.97962	-37.6884	-42.0037	-87.8061	31.0768	0	-56.711	-111.245	27.0024	-13.2453	0	0	-64.2748	-96.3504	-61.8982	-50.8639	15.2441	-86.4074	-82.2227	-36.9323	-63.4049	-35.5691	-78.7464	-56.073	-4.43074	-72.4011	-9.29389	-45.9796	-82.2475	15.3321	14.1726	-37.2929	-85.1184	-68.8145	-38.4058	34.6126	30.2809	-120.852	-94.7327	-64.8759
ERVLE_16p11.2a	0	0	0	0	0	0	0	0	0	0	0	0	0	0	0	0	0	0	0	0	-2.56184	0	0	0	0	0	-4.93019	0	0	0	0	0	0	0	0	0	0	0	0	0	0	0	0	0	0	0	0	0	-5.2744
ERVLE_16p11.2b	0	0	0	-10.1446	-10.3075	0	-17.3664	-8.26943	0	-1.7314	0	0	-15.7823	0	0	0	-25.7717	0	0	0	-5.65511	-12.2298	0	-14.4354	-10.3569	4.58064	-29.3505	0	0	0	0	-11.7967	-14.3947	0	-21.7871	0	-11.1689	-7.95815	0	9.87983	0	-11.7125	-18.2692	0	0	10.8965	-22.1329	-21.4058	-26.7206
ERVLE_16p12.1b	-2.53029	0	-11.354	-18.0802	0	0	-24.808	-25.5972	6.09891	0	-20.9598	-6.64192	-31.4459	7.60323	-17.1788	-13.3328	-51.3818	8.05909	0	4.12239	-16.1498	-34.7606	-24.5383	-29.1035	-31.5661	0	-63.8339	-20.2484	-9.33646	-26.504	-16.0646	-28.2443	-30.66	-2.76443	-49.7247	0	-12.8729	-28.5102	0	0	-15.4202	-20.3566	-36.4132	-18.8505	11.7953	10.0801	-58.5474	-41.4032	-58.9863
ERVLE_16p12.1c	-1.27746	0	0	0	0	0	0	-4.02478	0	0	0	0	-6.70367	0	0	0	0	0	0	0	0	0	0	0	-4.40087	0	0	0	0	0	-3.12055	0	0	-1.2604	-8.11963	0	0	0	0	0	0	0	0	0	0	0	0	-7.30358	0
ERVLE_17p11.2c	-6.7022	22.6778	-21.1358	-63.2161	-13.5895	17.7671	-36.5529	-53.2247	34.0249	-4.18286	-40.5577	-42.9753	-92.8895	32.6706	0	-62.9632	-125.73	24.6735	-13.3814	8.66819	-13.8736	-72.0343	-103.579	-63.2662	-60.6121	14.1446	-105.658	-91.887	-39.5165	-75.1036	-28.882	-79.5178	-58.2345	-5.21972	-80.0383	-8.45041	-33.8277	-76.9092	13.5586	15.8744	-35.2866	-86.0571	-73.538	-43.9312	28.587	27.9604	-138.75	-99.4476	-89.6014
ERVLE_17q21.31	-1.9447	0	-5.51933	0	-2.82475	0	0	-7.33331	0	0	-8.56939	0	-12.2591	0	-8.22681	0	-9.61473	0	-2.16756	0	0	-6.90524	-6.96511	-12.2085	-10.5587	0	0	-5.38469	0	-10.9572	-5.27138	-12.541	-6.5625	-2.08483	-14.9122	-3.28777	0	-11.3254	0	0	-5.6324	-9.83423	0	0	0	0	-13.9471	-15.2988	-11.3801
ERVLE_17q24.1	0	0	0	0	0	0	0	0	0	0	0	0	-11.9481	0	0	0	0	0	0	0	8.03246	0	-11.4605	0	0	0	0	-11.8103	0	-12.5916	0	0	0	0	0	0	0	-14.9485	0	0	0	-14.6202	0	0	0	0	0	0	0
ERVLE_17q24.3a	-0.682943	0	0	-7.84132	-0.922884	0	0	-7.32321	0	0	0	0	-9.80321	0	-5.31602	-9.50878	0	0	-4.44962	0	0	0	-11.6573	0	-8.29718	0	0	-9.30518	0	-8.04307	-6.14932	-9.80509	0	-0.980568	-14.2719	0	0	0	0	0	-6.29434	0	0	0	9.55064	0	-15.1666	-12.1277	0
ERVLE_18q11.2a	-0.197656	0	0	0	0	0	0	0	0	0	0	0	0	0	0	0	0	0	0	0	0	0	0	0	0	0	0	0	0	0	0	0	0	-0.197307	0	0	0	0	0	0.768527	0	0	0	0	0	0	0	0	0
ERVLE_18q21.1b	-2.11982	10.2087	0	0	0	5.43342	0	0	0	-2.24041	0	0	0	0	0	0	26.0149	0	0	0	18.2905	24.6233	0	0	0	0	30.5397	0	0	0	0	0	0	0	0	-5.45164	0	-15.1934	0	0	0	0	0	0	0	0	0	0	34.1464
ERVLE_19q13.12c	0	0	0	0	0	0	0	-5.95232	5.11385	0	0	-3.32655	-7.88986	4.97901	0	-5.04068	-9.96785	3.65918	0	0	0	-6.42019	-6.92309	0	-6.17751	0	0	-7.05511	0	-9.98246	-4.87432	-7.22868	0	0	-14.4832	0	0	-5.02888	0	0	0	0	0	-4.57754	0	3.30187	-11.3346	-13.8091	-6.95842
ERVLE_1p13.3b	0	10.4688	0	-21.0511	0	10.4128	0	-23.6317	0	0	0	-17.7821	-33.2005	0	-21.071	-17.722	-43.9795	0	-7.55566	0	-10.9976	-31.9564	-41.9666	-26.9415	-18.4614	0	-44.2399	-36.4541	-15.565	-43.0433	0	-31.9093	-28.2809	0	-43.8149	-6.54507	-17.3284	-34.9891	2.85874	0	0	-28.8221	-37.4489	-21.5217	24.1051	12.8702	-50.3936	-38.6027	-37.8638
ERVLE_1p22.3a	-4.28046	17.2259	-20.1021	-50.7994	-11.4922	13.3026	-27.95	-44.2092	28.758	-3.64345	-33.7029	-27.4511	-64.1622	33.0599	-21.7866	-44.6759	-92.6204	25.3853	-9.42564	11.4365	-12.0099	-56.1953	-69.9048	-45.5164	-49.7764	10.9854	-79.6943	-62.0019	-28.5489	-52.2051	-26.742	-56.6894	-48.1114	-3.89391	-68.1222	-6.13215	-28.4419	-55.7054	7.33576	12.2086	-23.5266	-57.6119	-56.6336	-33.1962	26.4521	23.6259	-96.3886	-75.1374	-70.156
ERVLE_1p31.1k	-3.43526	9.77363	-23.7511	-49.6218	0	10.8112	-23.6064	-45.5462	20.9048	-2.99706	-35.4845	-36.0869	-72.6846	0	0	-50.3422	-102.312	21.6533	-9.4682	0	-14.1863	-60.5822	-83.4352	-52.5573	-48.8787	11.1533	-86.7632	-69.9097	-34.3985	-57.1009	-30.8698	-69.042	-50.2933	-3.034	-63.8461	-6.22064	-28.9588	-65.207	6.23352	15.7909	-25.515	-68.2724	-61.8533	-32.885	0	26.6635	-104.628	-71.485	-70.754
ERVLE_1p34.2a	-1.23489	0	0	-7.29232	0	0	0	-5.11993	0	0	-6.94947	0	-12.2287	0	0	-6.80203	-11.2496	2.8654	0	0	-3.43569	0	-5.52963	-7.49065	-8.49818	0	-13.7783	-5.88625	-6.13245	-9.72654	-4.96271	-10.957	-5.38278	-1.11832	-14.9139	0	0	0	0	0	-6.02584	0	0	0	0	0	-19.2932	-14.3442	-12.8491
ERVLE_1p35.1a	-1.1708	2.07485	-3.59903	0	0	0	0	-4.96642	0	0	-4.98636	0	-6.71416	0	0	-5.48604	-7.81923	0	-0.550155	0	-2.79279	-3.52644	-5.17675	-4.61877	-5.4441	0	-7.67564	-4.66314	0	-6.79493	-4.97213	-6.17795	0	0	-9.21094	-2.71324	0	-4.48219	0	0	0	0	-4.48946	0	0	0	-9.92591	-7.2317	-6.70341
ERVLE_1p35.1c	-5.5244	20.109	-21.6594	-54.6426	-11.0269	14.9844	-35.4616	-54.2752	32.7951	-3.16358	-38.4054	-37.0703	-84.3948	37.607	-25.1458	-49.9213	-115.046	23.6227	-11.2497	12.6514	-10.0209	-70.043	-90.1026	-62.1602	-57.4574	14.3981	-93.5674	-80.4065	-32.1629	-68.9642	-27.0645	-75.6808	-59.964	-4.65059	-79.3614	-7.65859	-35.6383	-79.2768	11.2155	18.9936	-27.0851	-81.5413	-62.9047	-40.4649	31.1371	25.5715	-123.535	-96.1188	-82.861
ERVLE_1p35.2b	0	0	-12.8745	-31.9361	0	0	-16.5383	-27.4198	0	-2.01981	-18.0205	-23.2465	-44.9456	0	0	-31.871	-57.5724	11.3797	0	0	-8.04999	-36.2171	-53.9999	-30.9735	-27.3332	7.77877	-44.1175	-43.0223	-19.1169	-35.1528	-25.435	-44.7595	-30.1029	0	-41.6096	0	-21.1188	-38.8852	5.77403	10.2049	0	-41.2676	-39.6806	-20.7402	0	13.4997	-58.3919	-44.9513	-34.8086
ERVLE_1p36.11d	0	0	0	0	0	0	0	0	0	0	0	0	0	0	0	0	0	0	0	0	0	0	0	0	0	0	0	0	0	0	0	0	0	0	0	-0.132399	0	0	0	0	0	0	0	0	0	0	0	0	0
ERVLE_1p36.12	0	2.34824	0	0	0	0	0	0	4.68939	0	0	2.92558	0	0	0	0	0	0	0	0	3.97442	6.9076	0	0	0	0	0	0	0	0	0	0	0	-1.58325	0	0	0	0	0	0	0	0	0	0	0	0	0	0	0
ERVLE_1p36.13b	0	0	-9.90076	-8.69402	0	0	-16.8339	-18.7497	5.05133	0	-18.2849	-6.39437	-24.8663	5.92199	-12.7333	-14.8509	-37.9839	1.66866	-5.58174	2.62155	0	-25.0887	-24.1466	-24.0457	-17.5224	0	-33.6792	-18.63	-8.09437	-20.4693	-11.1778	-20.8159	-27.3387	0	-31.3023	0	-15.3843	-22.8208	0	0	-12.0488	-22.7681	-25.3557	-24.3203	9.17844	5.92337	-36.175	-35.1957	-26.0925
ERVLE_1q23.1a	0	0	-6.09312	0	0	4.68304	0	-6.45832	6.67987	0	-5.00405	0	-8.73639	8.04938	0	-5.16922	-9.41991	0	0	0	0	-7.38374	-7.26534	-9.91818	-8.87809	0.714314	-8.82915	0	-4.03857	-7.80025	-3.62194	-6.02311	-7.91603	0	0	0	-4.59512	-7.85464	0	0	-6.36138	0	-5.51729	-7.21419	0	0	-8.4281	0	0
ERVLE_1q23.1d	-2.34466	0	-10.5042	-21.2966	0	0	-12.6649	-18.3777	0	-1.25862	-12.4723	-6.93239	-20.965	0	0	-17.3502	-34.7094	0	0	0	0	-23.067	-30.8665	-14.7594	-20.6759	3.92178	-28.5453	-19.6985	-11.1274	-20.0286	-14.1474	-21.7549	-17.8031	0	-24.9898	0	-14.4194	-25.2195	0	0	-10.2337	-16.0732	-24.9411	-11.6749	9.58016	10.285	-33.6475	-29.2569	-25.211
ERVLE_1q23.2b	-5.61492	15.8232	-15.644	-39.2201	-13.3131	0	-31.1248	-35.9655	18.0348	-3.07248	-33.1942	-17.0889	-56.8145	0	0	-33.4623	-69.577	24.6445	-13.0963	8.75357	0	-40.2728	-53.7143	-43.4801	-38.3912	11.9062	-60.3529	-44.9421	-19.5283	-42.901	-22.6515	-53.8007	-38.122	-3.65622	-56.9309	-9.98047	-31.0209	-49.1271	8.88547	11.6845	-21.5569	-46.6963	-46.4837	-25.7205	0	19.2114	-76.8999	-63.3572	-53.3625
ERVLE_1q31.3g	0	1.09556	0	-3.09073	0	0	0	0	0	0	0	0	0	0	0	0	0	2.32861	0	0	0	0	0	0	0	0	0	0	-3.24698	0	0	0	0	0	0	0	0	0	0.0683149	0	0	0	0	0	0	0	0	0	0
ERVLE_1q32.1e	0	0	0	0	0	0	0	0	0	-0.826005	0	0	0	0	0	0	0	0	0	0	10.0019	0	0	0	0	0	0	0	-5.03104	0	0	0	0	0	0	0	0	0	0	0	0	0	0	0	0	0	0	0	0
ERVLE_1q32.2a	-4.80553	19.1731	-25.0976	-61.8821	-12.7693	0	-39.0396	-55.3211	24.4944	-3.34459	-43.2802	-25.8982	-78.4504	31.0205	-33.7646	-56.012	-113.985	23.2064	-12.7489	15.0797	-11.6201	-66.559	-84.2194	-54.7797	-54.3849	0	-94.3206	-72.3246	-30.2247	-57.2243	-38.7236	-62.8846	-56.8214	0	-76.6922	-8.90164	-37.717	-72.271	11.9426	0	-34.5901	-64.6516	-67.2371	-40.9314	27.6923	31.4506	-111.807	-89.2992	-77.0764
ERVLE_1q42.12a	0	6.233	0	-9.23237	2.8967	9.13238	-8.67998	-15.2124	6.6911	0	-7.33125	-6.35574	-20.1553	0	-9.37835	-9.98928	-30.1787	0	0.584054	2.0556	-4.00535	-14.2146	-15.8874	-20.7537	-12.5424	0	-28.0335	-11.5952	0	-8.39258	0	-8.50945	-11.4908	0	-12.3736	0	0	-19.6092	0.850256	0	-6.94147	-16.9055	-17.1499	-11.1579	10.7985	4.59861	-26.5283	-18.3603	-20.8657
ERVLE_20q13.12b	0	0	0	-9.29915	0	0	-15.8933	-12.4861	3.64288	0	-10.2401	-3.68241	-15.6623	4.60469	0	-6.62374	-25.1474	0	0	0	-7.0128	-15.7472	-12.9545	-15.5713	-14.8325	0	-28.0877	-11.7827	0	-15.3321	-6.12605	-14.3707	-11.4466	-1.31385	-23.5716	0	-12.1521	-13.5104	0	5.04829	-10.1059	-15.5107	-15.8186	-9.79022	0	0	-30.1684	-23.8218	-26.6775
ERVLE_20q13.12c	0	0	0	0	0	0	0	0	0	-2.22526	0	0	0	0	0	0	0	0	0	0	10.3737	0	0	-14.9531	0	0	0	0	0	0	0	0	0	0	0	0	0	-19.6784	0	0	0	0	0	0	0	0	0	-15.9228	0
ERVLE_20q13.33a	0	0	0	0	0	0	0	-6.35277	0	-0.837364	0	0	0	0	0	0	0	0	0	0	0	0	0	0	-6.63534	0	0	0	-6.51224	-8.20425	0	0	0	0	0	0	0	-6.03755	0	0	0	0	0	0	0	1.22695	0	0	0
ERVLE_20q13.33b	-4.6726	9.90112	0	-29.9597	-9.88583	8.22594	0	-16.9025	18.1674	-3.25762	0	-11.298	-27.1581	0	0	-16.9968	-24.2194	16.4396	-14.3745	6.36089	11.6311	0	-24.0031	-20.1545	-15.7688	8.81034	0	-22.5439	-18.351	0	0	-30.5535	0	-2.54003	0	-7.94795	0	-32.3352	8.38339	12.1979	0	-17.5376	0	0	0	13.2904	-25.6598	-26.796	0
ERVLE_22q11.23b	-0.982	0	0	-5.24013	0	0	-6.62343	-4.91667	0	0	-7.0371	0	-8.33617	0	-6.91698	-3.22125	-11.2068	0	0	0	-2.75594	-6.5068	-4.9724	-8.13015	-5.07358	0	-11.8804	-4.47368	0	-7.44616	-4.66276	-7.01428	-6.04165	-0.997501	-12.1464	0	0	-5.41201	0.0725332	0	0	-5.88906	-6.81438	-5.66665	0	0	-15.2182	-12.2521	-9.7657
ERVLE_22q13.2f	0	0	0	0	0	0	0	0	0	0	0	0	0	0	0	0	0	0	0	0	8.32041	10.3367	0	0	0	0	0	0	0	0	0	0	0	0	0	0	0	0	0	0	0	0	0	0	0	0	0	0	15.6922
ERVLE_22q13.31e	-3.2124	0	0	-14.6878	-9.93745	0	0	0	8.00208	-1.68592	0	-14.5923	-28.7974	0	0	-14.3145	-33.95	13.5098	0	0	0	-12.1209	-29.7078	-26.2057	0	7.52713	-21.9149	-25.8939	-9.54685	-19.5903	0	-26.8632	-14.1584	0	0	0	0	-30.3621	0	0	0	-36.2382	-14.9726	0	0	0	-31.237	0	-15.2529
ERVLE_2p13.2a	-5.26181	18.6665	-15.9287	-43.5202	-10.3844	13.3796	0	-27.644	33.5404	-3.52745	-19.1548	-18.6784	-50.7495	28.8662	0	-35.233	-62.2338	17.014	-4.0563	9.87478	0	-31.5138	-56.7912	-25.3798	-31.3024	11.6865	-31.6783	-53.2032	-25.7805	-45.4375	-17.9423	-44.0723	-26.0467	-3.91556	-45.8936	-5.6064	-21.3659	-35.0651	9.60898	15.0143	0	-33.6968	-24.3042	-15.7459	19.8445	18.9964	-64.2292	-53.045	-33.1745
ERVLE_2p14b	0	6.88172	0	-12.1075	-5.49136	0	-10.0013	-22.5604	7.35425	0	0	-11.4107	-15.8263	7.54039	0	0	0	0	0	0	0	0	-16.4182	-24.0003	-18.2568	0	0	-12.8952	-7.5016	-15.8172	0	-15.187	0	-2.23362	-20.6466	0	-17.0261	-28.2384	0	0	-10.7377	-20.5192	0	0	0	0	-25.3312	-31.1195	0
ERVLE_2p22.1b	0	7.59495	-6.74902	-15.5486	0	0	-12.9218	-11.4232	8.81861	0	0	0	-11.6567	12.3771	0	-10.622	-24.9252	0	-6.80946	5.86566	0	-14.688	-15.3389	-13.5052	-12.3082	4.6781	-18.7548	-10.7811	-7.89916	0	0	-15.9284	-15.9731	0	-16.0718	-3.86616	-11.7961	-15.3216	0	7.15339	-9.72001	-13.1673	-15.794	-11.2231	0	11.6464	-21.3473	-19.0985	-16.5765
ERVLE_2q11.2c	0	0	0	0	0	0	0	-6.16935	0	0	-8.11344	-2.92721	-9.28076	0	0	-5.43553	-20.724	1.73104	0	1.88499	-9.36147	-13.4867	-6.08382	-9.46798	-11.8422	0	-25.2823	-6.58613	-3.84361	-7.79098	-5.96302	-9.18865	-7.91211	0	-13.9327	0	0	-8.06975	0	0	-5.66058	-7.27746	-15.1344	-4.87575	5.40517	3.74127	-19.8615	-11.8671	-23.9585
ERVLE_2q12.3c	0	7.3184	0	0	0	0	0	-12.7262	0	-2.82079	0	0	-19.7218	0	0	0	-24.7091	8.33661	-7.25407	0	0	-17.6847	-24.0996	-21.1316	0	6.49478	0	-16.1972	0	-13.9467	0	-15.0114	-17.2465	0	-18.3958	-7.44344	0	-25.7175	0	8.11458	0	-24.513	-15.9593	-16.1799	13.7475	0	-18.5595	-22.9311	0
ERVLE_2q12.3e	0	0	0	-21.7001	0	0	-17.0454	-17.6168	0	-0.761106	0	-8.11091	-20.837	0	0	-11.3166	-42.8512	4.9625	-7.32951	0	0	-27.1192	-29.1026	-20.8735	-15.6174	5.68101	-32.3004	-22.0435	0	-17.8545	0	-18.0425	-22.6746	0	-26.4797	-6.76415	-17.8947	-23.9406	0	0	0	-24.4601	-24.8378	-19.5461	14.8082	14.7174	-33.4037	-28.5078	-29.6634
ERVLE_2q14.1b	0	0	0	0	-8.38857	0	0	-9.91249	0	-1.78068	0	0	-18.5234	0	0	0	-24.1927	0	0	0	0	0	-15.2088	-13.3921	-12.4418	0	-22.8597	-15.6723	0	-15.1182	0	-13.4872	-10.2331	0	-23.9721	0	0	-19.9903	3.43525	0	0	-15.4139	-15.7099	0	0	0	-29.6261	-18.4171	-27.1968
ERVLE_2q21.2a	0	0	0	0	0	0	0	0	0	0	0	0	0	0	0	0	0	0	0	6.6494	3.98115	0	0	0	0	2.35575	0	0	0	0	0	0	0	0	0	0	0	0	0	6.60167	0	0	0	0	0	10.374	0	0	0
ERVLE_2q24.2a	0	0.00985539	0	0	0	0	-1.30756	-1.28644	0	0	-2.62306	0	-1.75296	0	-1.63692	0	-3.98429	0.00414042	0	0	-3.20265	-3.65673	-1.13951	-2.62087	-2.12247	0.0241113	-7.18583	-1.00767	0	-2.71305	-0.726164	-2.12311	-2.62203	0	-3.9691	0	-0.730351	-1.18925	0.0028166	-0.0145995	-0.328275	-0.815151	-4.1163	-2.67794	0	0	-4.32606	-2.13727	-6.38654
ERVLE_2q24.2c	0	10.8879	0	0	0	19.1822	-15.4896	-20.5194	13.9325	-3.08021	-21.9095	0	-25.7039	15.6744	-19.1223	0	-33.1551	5.83541	0	0	0	-20.1017	-24.2616	-30.7086	-17.2876	4.90225	-31.3301	-19.8722	0	-20.8278	0	-20.1794	-19.2608	0	-34.4158	0	0	-36.2733	4.1655	0	0	-23.821	-23.1335	-17.3909	0	0	-41.9406	-35.0535	-31.2124
ERVLE_2q31.1b	-0.978337	0	0	-3.98381	-1.12102	0	0	-2.56184	0	0	-3.77032	0	-5.16116	0	0	-4.21428	-3.80991	0	0	0	0	0	-2.91515	0	-3.82244	0	0	-2.98935	-3.29238	-5.43436	-3.03352	-4.28155	0	-0.992775	-4.78523	0	0	-3.01415	0.0052025	0	0	0	0	0	0	0	-4.4554	-5.06649	0
ERVLE_2q36.3b	-0.942273	0	0	0	0	0	0	0	0	-0.677796	0	0	0	-3.04202	0	0	0	0	0	0	-2.99451	0	0	0	0	0	-8.18483	0	0	0	0	0	0	-0.762119	0	-2.10747	0	0	0	0	0	0	0	0	0	0	-7.41639	0	-10.5293
ERVLE_2q37.3e	-4.2889	7.46952	-12.9531	-28.7389	0	0	-19.3314	-24.9632	15.5572	-3.77272	-18.2277	-9.26785	-32.9348	0	0	-22.5907	-30.5445	14.8076	-7.29408	11.0012	8.89338	0	-28.8038	-20.4039	-21.911	5.32865	0	-26.5239	-18.5019	-26.3379	-16.1684	-28.1272	-14.7099	0	-35.6362	0	-16.077	-30.1733	7.39256	0	0	-18.7131	0	0	20.317	21.0394	-34.3421	-35.5234	0
ERVLE_3p21.31a	-3.21878	0	0	-37.6569	0	0	0	-28.502	23.9553	-2.00824	-23.2346	-21.2526	-46.686	24.322	0	-41.2124	-73.9631	25.1296	-7.88926	12.5205	-13.4439	-39.3327	-53.2022	-29.0281	-38.3179	10.5104	-62.9507	-47.8381	-20.0078	-35.8135	-21.2465	-47.3401	-28.7435	0	-42.7416	0	-16.7607	-37.7478	0	14.1409	-19.8943	-35.0408	-40.0194	-16.8036	29.1254	24.3194	-74.4111	-47.324	-60.037
ERVLE_3p21.31d	0	0	0	0	-5.90345	-0.8213	-9.6263	-17.3842	0	0	0	-7.60098	-17.2219	0	-13.1515	0	0	0	-3.65587	-0.404357	-7.04988	-16.0838	-17.6878	-20.6334	0	-1.88061	-30.735	-12.522	-6.33099	-21.1527	0	-14.1266	-14.6132	0	-25.2868	-1.21252	-10.8895	-25.2682	0	0	0	-18.4329	-22.5691	0	0	0	-31.8116	-23.948	-26.1116
ERVLE_3q25.1	0	0	0	0	0	0	0	0	0	0	0	3.95907	0	0	0	0	0	1.97416	0	0.512563	5.35459	7.34103	0	0	0	0	0	0	0	0	4.73988	0	0	0	0	0	0	0	0	0	6.20236	0	0	0	0	0	0	0	0
ERVLE_3q26.1a	0	19.1302	0	0	0	15.0401	0	-19.3087	19.6321	0	-16.4135	0	-26.4733	13.7412	-17.7319	0	0	4.80368	0	0	0	0	-22.8035	-28.2303	-14.5367	0	-20.1449	-19.0201	0	-16.1909	0	0	0	0	0	0	0	-42.2188	1.88233	0	0	-26.981	0	0	13.4719	0	-29.6654	-23.4966	0
ERVLE_3q26.2	-1.94951	0	0	0	-6.26232	0	0	0	0	-2.27005	0	0	0	-4.8883	0	0	0	0	0	0	0	5.31794	0	0	0	0	0	0	0	0	0	-4.80548	0	-1.77489	0	0	0	0	0	0	0	0	0	5.84538	0	0	0	0	0
ERVLE_3q28e	0	17.3481	-15.5382	-29.8973	0	7.61182	-20.1911	-31.7943	17.3572	0	0	-29.2704	-54.9064	19.7869	0	-33.265	-68.3174	16.9755	-8.47811	10.3701	0	-46.0192	-62.7415	-40.1394	-31.0566	8.79289	-61.659	-54.0551	-23.2537	-43.0958	-16.4742	-46.2076	-37.5412	0	-46.5792	-5.6857	-23.3992	-50.7024	7.34983	0	0	-63.7424	-53.1378	-28.5918	0	21.4284	-72.3873	-54.6367	-51.7339
ERVLE_4p12e	0	0	-18.3985	-30.3819	-6.56419	0	-26.449	-36.8928	0	0	-29.3344	-19.6581	-47.0146	0	-28.1964	-24.0144	-77.2688	0	-4.76604	6.22234	-18.9146	-48.2507	-46.1226	-38.1707	-40.6437	0	-75.882	-38.9197	-18.6606	-42.6892	-23.9609	-37.4293	-40.772	0	-62.5142	-5.92825	-22.776	-45.5239	0	0	-14.851	-41.8102	-54.483	-29.106	20.5399	14.9524	-79.3485	-60.6108	-69.8813
ERVLE_4p16.1b	0	0	0	0	0	0	-2.59894	-1.93107	0	0	-2.04404	0	0	0	-2.15198	0	0	0	0	0	0	0	0	-2.34613	0	0	0	0	0	0	-2.28582	0	-2.41292	0	0	0	-1.78748	-2.15631	0	0	-1.1222	0	0	0	0	0	0	-2.56701	0
ERVLE_4p16.1c	0	0	0	0	0	0	0	0	0	0.00338228	0	0	0	0	0	0	12.9848	0	0	0	9.51931	10.2237	5.89344	0	0	0	18.434	0	0	0	0	0	6.19324	0	0	0	0	0	0	0	0	0	11.4667	0	0	0	0	0	16.554
ERVLE_4q21.1b	-3.09786	0	-20.3843	-32.8788	0	0	-22.3332	-35.9076	0	-4.13952	-27.5484	-20.3586	-54.4733	11.5336	0	-39.4845	-84.1789	16.1681	-12.1177	9.43478	-13.2608	-48.6136	-55.1578	-38.4105	-45.1419	11.3292	-68.1504	-47.4188	-22.3532	-37.3827	-24.9923	-48.6319	-41.3751	-2.31938	-52.4767	-7.45834	-21.4526	-48.9799	5.09937	12.9859	-23.5195	-43.3009	-53.2501	-24.934	19.8973	19.0243	-82.8057	-62.3105	-63.6251
ERVLE_4q21.23a	0	0	0	-16.8153	-3.99948	0	-22.9914	-21.6829	0	0	-17.5528	0	-24.3453	0	-15.8364	-9.48547	-44.4246	7.949	0	0	-14.8028	-28.1161	-20.3166	-23.3908	-26.6001	0	-53.6819	-16.9613	0	-23.5292	-12.5813	-18.5085	-23.6435	0	-39.2827	0	-10.0999	-21.7022	0	7.42631	-10.6815	-16.1185	-27.1345	-16.031	11.4774	6.7947	-46.7376	-33.4458	-49.1271
ERVLE_4q24g	-4.9856	12.0428	-19.6479	-46.6191	-10.684	15.753	-33.7765	-51.36	16.8822	-3.82405	-38.6173	-26.6359	-66.8562	20.7798	-24.0005	-40.0575	-111.075	22.3723	-10.2573	13.1952	-12.0456	-64.5091	-71.3828	-57.6857	-56.0344	14.131	-90.2161	-63.5003	-22.2928	-51.4268	-29.235	-61.9577	-54.598	-4.13987	-72.2872	-6.80096	-31.6616	-74.7093	7.13274	16.8853	-23.7382	-65.5183	-65.4885	-36.8897	25.9832	25.8422	-107.708	-87.5335	-82.3978
ERVLE_4q24h	-1.5625	0	-4.51655	-10.1677	-2.16626	0	-10.2129	-3.8506	0	0	-5.97853	0	-6.06199	0	0	-6.50717	-7.66115	0	0	0	-2.62879	-4.26	-5.91562	0	-6.49827	0	-6.30414	-4.96193	-5.00433	-8.29126	-5.07695	-6.7548	0	-1.58317	-9.40893	0	-5.31364	0	0	0	0	0	-4.62922	0	0	0	-8.89568	-8.56008	-6.16898
ERVLE_4q28.1b	0	0	-20.3036	-26.3522	0	0	-29.2156	-32.8205	7.32467	0	-28.1977	-5.73359	-39.1356	10.3439	-17.8519	-24.4881	-60.8217	10.697	0	7.34106	-12.0505	-41.2973	-35.8488	-26.8999	-34.319	3.43003	-59.8222	-23.3365	-11.4773	-25.6188	-25.4142	-29.9265	-34.4056	0	-49.7712	0	-24.4599	-37.4969	0	9.3114	-17.1924	-27.8732	-45.2974	-24.8357	0	9.40896	-57.5177	-47.7317	-56.1164
ERVLE_5p12a	0	0	-14.9876	-19.9605	0	0	-12.7071	-23.0932	-3.34908	0	-19.5261	-17.0996	-31.913	0	-15.5964	-25.9579	-41.0089	0	-6.7208	2.83098	-6.84749	-29.8303	-38.0893	-23.2784	-19.2864	0	-38.69	-31.0628	-18.1211	-26.6657	-17.3329	-26.4484	-24.3319	0	-30.6629	-4.3813	-15.3038	-28.0204	1.7992	0	-12.4224	-35.0948	-30.2446	-20.1761	0	10.4454	-43.9765	-34.4089	-33.6159
ERVLE_5p15.31b	0	0	0	-2.67222	0	0	-5.92789	-2.90736	0	0	-3.19073	0	-2.63375	0	-3.67997	-1.64914	-4.03982	0	0	0	0	-2.93556	-3.11298	-3.99256	0	0	-2.97468	-1.61787	0	0	-2.56239	-3.86307	-2.86314	0	0	0	-4.41478	-2.99175	0	0	0	-3.36733	-3.50206	-3.30367	0	0	-4.31608	-3.85306	0
ERVLE_5q12.3a	-5.83192	21.7684	-18.429	-58.1172	0	20.3721	-28.3669	-42.4695	36.8083	-3.60564	-31.1067	-34.5976	-72.2283	34.7796	0	-55.5298	-104.543	27.8096	-11.8523	11.8078	-13.6166	-56.51	-82.6546	-41.5547	-52.1127	14.48	-88.3618	-75.1292	-35.1427	-54.7439	-27.4406	-65.9159	-47.8604	-4.25598	-66.1327	-8.02359	-23.938	-59.0161	14.1697	18.6361	-30.5846	-59.7144	-61.3596	-29.5434	28.8224	32.4405	-115.796	-76.4515	-80.69
ERVLE_5q14.3h	0	0	-8.90596	0	0	0	0	-11.2813	0	0	-9.20819	-11.4843	-19.7997	0	-10.1109	-10.6585	0	0	-3.12207	0	0	0	-22.3346	0	0	0	0	-19.8914	-12.2256	-17.3381	0	-21.1763	0	0	0	-1.84839	-12.4269	-13.3108	0	0	-10.5037	-19.0234	0	0	0	0	-26.0796	0	0
ERVLE_5q22.2b	0	0	0	0	-6.54995	0	-8.38301	-16.4194	0	0	-13.0479	0	-13.5785	0	-12.2337	0	-21.4923	0	-0.573896	0	0	-12.2711	0	-19.7868	-15.9586	0	-21.308	0	0	-12.4733	0	-9.67022	0	0	-19.5544	0	-10.203	-22.4086	0	0	-7.1862	-16.7519	-11.6492	0	0	0	-23.7191	-23.7593	-19.625
ERVLE_5q22.3e	0	0	0	-13.5318	0	9.04187	0	-13.922	14.7098	0	-13.6957	-4.67427	-16.4208	0	0	-13.9742	-29.1078	11.8648	-2.81061	0	0	-20.2623	-18.6538	-13.8163	-15.8105	5.13354	-20.0304	-15.3634	0	-17.0649	-10.1274	-21.0618	-16.8935	0	-25.6163	0	-10.5129	-16.2754	0	0	0	-10.8196	-13.8157	-10.6745	0	13.0744	-24.6362	-23.859	-16.4233
ERVLE_5q23.3g	0	5.8365	0	0	0	7.1628	0	0	7.79394	0	0	0	0	5.49066	0	0	0	0	0	0	0	-5.38618	0	-5.77231	0	1.31741	0	0	0	0	0	0	0	0	0	0	0	-7.03792	0	0	0	-5.45906	0	-4.97479	1.43857	0	0	0	0
ERVLE_5q31.1d	0	14.0869	-21.51	-40.3707	0	19.5502	-34.7055	-43.5406	18.8419	-2.0428	-32.777	-21.9744	-56.3505	19.0928	-24.5239	-28.9355	-85.1473	13.8071	-10.5408	12.5457	-10.4138	-52.439	-54.4367	-47.5394	-46.3845	9.74035	-70.3593	-47.4315	-21.1	-43.7731	-23.7327	-49.7271	-46.8961	0	-68.3196	-7.79122	-33.2167	-58.7878	7.19897	0	-23.5813	-54.5556	-58.8284	-31.7215	18.4885	19.8554	-81.9768	-70.7507	-67.2029
ERVLE_5q31.3d	-2.86822	9.69557	-22.358	-38.0204	0	7.79836	-24.7466	-38.9488	18.4491	-3.21589	-30.3552	-22.1224	-57.3849	23.671	0	-36.318	-79.3292	15.351	-12.3051	0	-8.12417	-43.9654	-56.8041	-37.0515	-40.1524	6.46518	-60.1349	-47.7385	-26.5767	-40.7907	-23.2662	-46.0046	-37.3594	-2.35978	-57.4984	-6.26596	-20.7595	-50.9607	7.4612	0	-20.5191	-48.4806	-49.3379	-26.0366	20.5183	17.8675	-74.7611	-60.5446	-54.7977
ERVLE_5q31.3e	-0.00978545	0	0	0	0	0	0	0	0	0	0	0	0	0	0	0	-6.99698	0	0	0	-2.6956	-5.26344	-1.51936	0	0	0	-10.3294	-1.29551	0	0	-1.65478	0	-2.39461	0	-6.16281	0	0	0	0	0	0	0	-4.44973	0	7.50772	6.88913	0	-4.65336	-9.48348
ERVLE_5q32	0	0	0	-4.99162	0	0	-3.86809	0	0	0	-3.26032	-3.19752	-2.9992	0	0	-3.65737	-4.12608	0	0	0	0.0166571	0	-4.23944	0	0	0	0	-3.01728	-2.16718	-4.07548	0	-4.64299	0	0	-4.24834	0	0	0	0	-0.299285	-4.01546	0	0	0	0	0	-4.5513	0	0
ERVLE_6p21.32	0	8.4819	0	0	0	6.66723	0	0	0	0	0	0	0	0	0	0	0	0	0	0	0	0	0	0	0	0	0	0	0	0	0	0	0	0	0	0	0	0	0	0	0	0	0	0	0	0	0	0	0
ERVLE_6p22.1a	-3.63192	0	0	-25.3055	-11.3554	0	-17.9445	-16.7317	0	-3.32107	0	-6.43101	-30.7012	0	0	-17.7122	0	12.4089	-13.3007	0	15.6342	0	-21.7119	-18.9757	0	5.66811	0	-25.3413	-12.6196	-17.1071	0	-26.2078	0	0	-27.5942	-9.43169	0	-29.5233	0	0	0	-19.0056	0	0	0	0	-20.1899	-27.6679	0
ERVLE_6p22.1b	0	0	0	-9.18131	-4.69593	0	0	0	0	0	0	-3.04824	-6.4351	0	0	-5.67363	0	0	0	4.09002	0	0	0	0	0	0.852726	0	0	0	0	0	0	0	0	0	0	0	0	0	0	-5.75131	-5.44743	0	0	0	6.42384	0	0	0
ERVLE_6p25.1a	-1.22227	1.17205	0	-11.9004	0	3.06444	-10.6623	-7.88501	4.04422	0	-8.23667	0	-15.7788	3.9442	0	-6.10948	-20.2249	3.65834	0	2.02137	-5.99179	-10.1171	-8.24428	-10.3842	-13.2471	1.73547	-23.76	-5.70062	0	-9.85558	-5.62136	-10.3766	-9.11558	0	-16.1314	0	0	-8.3845	0	4.0038	-10.9894	-12.5927	-12.2288	-6.93464	0	2.48372	-23.3728	-16.3765	-23.2825
ERVLE_6q14.1m	0	1.84403	-5.74532	-8.48982	1.31556	0	0	-7.43892	0	0	0	-3.02707	-8.36712	0	-6.90392	-6.08614	-6.33404	0	0	-4.95857	0	0	-7.7121	0	-6.67402	0	0	-7.22492	-6.22091	-7.67334	-7.38846	-5.46083	0	0	-9.85223	0	0	-6.79843	0.255209	0	0	0	0	0	0	0	-6.62314	-6.36572	0
ERVLE_6q22.31b	0	0	0	0	-3.54913	0	0	-11.7098	2.78735	0	0	0	0	0	-9.90399	0	0	0	0	0	0	0	0	-17.1093	-11.704	0	0	0	-4.51527	-14.2794	0	-9.13054	-9.85908	0	0	0	0	-23.6003	0	0	0	0	0	0	0	0	-16.0688	-16.5041	0
ERVLE_6q22.31c	-3.74364	0	-17.4484	-36.3906	0	0	-24.2426	-31.299	0	-1.98341	-23.2792	-14.7279	-41.452	0	0	-29.7769	-56.0756	11.0179	0	10.8743	0	-31.2405	-43.892	-30.8399	-34.1559	7.59019	-41.9783	-36.7514	-21.7111	-31.2079	-20.8957	-40.0688	-28.4401	0	-48.2991	0	-21.7281	-40.641	0	10.9587	-15.628	-30.1891	-35.5764	-18.5664	15.2034	17.6439	-53.1207	-46.9369	-38.0611
ERVLE_6q25.2a	0	0	0	0	0	0	0	0	0	0	0	0	0	0	0	0	0	0	-5.5067	0	-5.1632	0	0	0	0	6.16942	0	0	0	0	0	-10.845	0	0	0	0	0	0	0	12.3086	0	0	0	0	0	0	0	0	0
ERVLE_7p21.3b	-0.482108	13.8107	0	0	-5.76892	11.007	0	-24.9533	8.20973	0	-20.7058	-12.0251	-26.2958	0	0	-11.636	-40.168	5.79742	0	0	0	-24.2377	-28.13	-40.8909	-18.03	6.58245	-32.185	-17.125	0	-15.6804	0	-25.1417	-18.381	0	-20.2061	0	0	-50.1636	0	8.50835	-9.17541	-43.0385	-25.5913	-20.3489	0	0	-32.8937	-28.7779	-20.6609
ERVLE_7p22.1a	0	0	0	-11.6812	-5.79375	0	0	-7.56924	0	0	0	0	-12.895	0	0	-11.5171	-14.6697	0	-4.79065	0	0	-7.37781	-13.9751	-6.63451	-7.6899	3.53617	0	-13.5923	0	0	-8.13981	-11.9193	0	0	-12.6178	-2.76298	0	-8.54408	0	0	-12.9557	-7.98771	0	0	0	0	-14.5855	-17.3548	0
ERVLE_7p22.1b	0	0	0	0	-0.547154	0	0	-3.13613	0	0	-3.55632	0	0	0	-2.70496	0	0	-0.676671	-0.082079	-0.0924906	-0.544561	0	0	0	0	-1.17687	0	0	0	0	-2.16311	0	-2.29002	0	-4.72098	-0.0941746	-1.74995	0	-0.0908473	0	0	0	-2.36441	0	0	0	0	-3.2458	0
ERVLE_7p22.3	0	11.8077	0	-17.4898	0	10.1365	0	-19.8429	16.2419	0	0	-12.3273	-19.5334	0	0	0	0	0	-6.84912	0	12.6529	0	0	-25.4042	0	0	0	-15.0087	-12.9158	0	0	-20.2048	0	0	0	0	0	-30.0045	0	0	0	-19.7631	0	0	0	0	0	-24.8154	0
ERVLE_7q21.2	-4.6436	9.26548	-23.9656	-52.0531	-9.67742	17.4436	-35.6701	-54.288	21.156	-3.91284	-41.7814	-24.8681	-71.2607	24.9799	-22.0592	-46.0661	-112.077	19.1062	-10.459	14.6587	-18.7632	-67.4896	-73.5995	-59.1873	-63.8192	13.0769	-102.364	-60.6321	-26.3043	-56.5223	-32.1877	-64.103	-57.4837	-3.8393	-78.4757	-7.24495	-32.9864	-75.9677	6.84304	22.4148	-27.7498	-65.1434	-66.4608	-36.6355	29.6188	27.6177	-116.074	-92.0392	-94.5139
ERVLE_7q22.1c	-1.33981	3.59136	-6.29021	-10.3479	0	0	-16.6094	-10.8318	0	0	-11.5991	0	-17.4501	0	-9.78997	-6.07603	-15.8718	0	0	0	-3.20665	-8.05285	-7.84389	-10.2276	-11.0435	0	-15.1031	-7.21312	0	-8.78537	-9.03497	-9.5029	-5.85279	-1.06484	-17.2196	0	-8.20971	-10.135	0	0	-7.28669	-9.27247	-9.15416	-6.85364	0	4.44239	-20.762	-18.8858	-14.7334
ERVLE_7q31.32f	-2.97505	7.21893	-17.9822	-44.0144	0	9.165	-25.4133	-36.2238	17.0486	-3.91902	-27.9624	-26.8601	-60.6094	18.0766	0	-39.6055	-88.3119	14.2982	-10.8513	0	-14.1436	-55.266	-68.567	-38.5917	-41.9287	13.7105	-72.3324	-62.8514	-26.4634	-45.7336	-22.6797	-57.1192	-48.3119	-4.86436	-58.0646	-8.16882	-23.2775	-49.7843	6.49032	17.2308	-22.2592	-55.3148	-55.1986	-28.05	29.6876	23.4694	-91.2122	-66.5679	-67.1133
ERVLE_7q31.32g	-2.1689	0	0	-23.5941	0	9.2	-15.7699	-19.6856	19.2917	-3.77345	-13.7615	-18.6749	-33.2644	13.1109	0	-20.5519	-49.0419	10.8706	-8.66575	0	-9.43359	-36.139	-40.798	-24.3047	-22.6477	8.38019	-46.3025	-35.365	-15.0641	-28.4167	-13.5846	-37.808	-32.1098	-3.47055	-29.8645	-4.98268	-16.0346	-27.2601	5.22637	0	-14.3905	-34.7017	-34.4687	-21.7249	24.7916	20.2802	-47.6547	-33.9575	-41.7906
ERVLE_7q31.33a	0	-0.024113	0	0	0	0	0	0	0	0	0	0	0	0	0	0	0	0	0.271992	3.83093	0	0	0	0	0	0	0	0	0	0	0	0	0	0.314707	0	0	0	0	0	0	0	0	0	0	2.87362	0	0	0	0
ERVLE_7q32.3a	0	0	0	-11.2036	0	0	0	-8.17512	0	0	-7.41435	-6.16067	-8.01061	0	0	-7.0463	-12.8159	0	0	5.29835	0	-8.72466	-10.2725	-5.61918	-8.06727	0	-8.12213	-8.60001	-6.84844	-7.5808	-7.78232	-10.4283	0	-0.0659182	-9.12796	0	-9.53179	-11.2923	0.133014	0	-8.65377	-8.5864	-8.31447	0	5.28172	10.5248	-12.0409	-9.22683	-7.44347
ERVLE_7q34a	0	0	0	0	0	0	0	0	0	-2.63346	0	0	0	0	-12.4302	0	0	0	0	5.47648	0	0	0	0	0	0	0	0	-7.2412	0	0	0	0	0	0	0	0	-20.4327	0	0	0	0	0	0	9.25748	0	0	0	0
ERVLE_8p21.3d	0	0	0	-26.145	0	0	0	-22.9409	18.4068	-2.35091	0	-11.4816	-35.4343	19.5137	0	-24.6562	-47.1941	17.9108	-7.43152	0	0	-28.8415	-36.5551	-26.958	-23.9406	9.84418	-47.5795	-31.5495	-13.5289	-28.7699	0	-35.6342	-27.4725	0	-43.5805	0	-25.1264	-29.6483	0	0	-17.0844	-26.6537	-29.411	0	19.7819	17.9657	-55.4673	-44.2141	-36.961
ERVLE_8p22a	-4.63012	12.4841	-14.8151	-40.1217	0	0	0	-32.3048	25.693	-3.21598	-23.4681	-16.6905	-48.7795	25.6929	0	-35.6813	-61.7713	20.0961	-7.61757	0	0	-35.0179	-55.7036	-29.5297	-29.4645	10.1389	-44.2823	-48.296	-24.4857	-42.6262	-20.4851	-43.2731	-33.1806	0	-47.1167	-3.51198	-19.0965	-41.4372	9.46514	14.6159	0	-35.7058	-24.9349	-19.229	22.6411	21.1463	-60.2023	-54.8045	-37.7852
ERVLE_8p23.1a	-4.45291	0	-13.6495	-29.327	0	8.29811	-22.7094	-30.443	13.836	-2.48048	-25.227	-7.0582	-42.0446	13.0763	0	-24.1114	-61.6337	9.98455	-5.12442	12.0133	-9.57911	-37.9399	-38.4751	-32.643	-34.5443	7.78203	-58.9817	-32.157	-15.5853	-35.3433	-15.0096	-37.3154	-33.0736	-3.01019	-52.6808	0	0	-38.9006	4.56411	14.1365	0	-27.4199	-35.4996	-20.238	28.0239	22.1013	-62.7838	-50.005	-54.5112
ERVLE_8p23.1b	-5.86197	0	-20.617	-46.7649	-9.75221	0	-18.9061	-41.6578	23.7933	-2.56978	-31.8076	-23.5465	-58.6948	29.4271	-23.1552	-53.5303	-97.4374	21.1477	-8.18647	15.6545	-9.06271	-51.3326	-67.0822	-41.5672	-49.3536	9.85209	-75.7023	-56.8133	-28.7291	-51.7465	-27.4145	-53.7705	-44.9954	0	-66.5194	0	-28.3302	-52.1058	6.93818	13.8521	-21.1009	-45.9219	-51.2294	-29.5954	27.2581	26.1839	-91.1632	-73.1251	-68.2959
ERVLE_8p23.1e	0	12.0442	-12.326	-33.9116	-9.82084	0	-19.426	-29.9742	26.7033	-1.86657	-23.8822	-22.3472	-47.2643	27.544	0	-30.6086	-56.2421	18.4654	-9.86571	12.2203	0	-35.7969	-51.9923	-30.9953	-34.118	7.69626	-42.8932	-45.4299	-23.9292	-43.1272	-20.3299	-51.584	-30.7034	0	-46.9839	-6.15824	-20.693	-39.533	10.0921	0	-17.683	-41.0585	-33.0679	-20.5469	25.5788	23.1326	-59.4419	-50.6208	-42.2596
ERVLE_8q13.2a	-3.67176	13.2106	-17.5831	-46.4468	0	0	-28.13	-38.7204	18.9857	-2.61669	-26.0831	-20.4438	-60.086	22.6617	0	-41.23	-86.273	23.4708	-12.4088	12.6122	-12.0265	-47.6708	-65.0264	-38.6201	-42.9165	12.0349	-73.2578	-57.0627	-22.5303	-40.0942	-23.2136	-48.1039	-41.1072	0	-50.7743	-7.84144	-30.3778	-55.1943	10.3117	12.9336	-23.4428	-49.6345	-55.7528	-23.0376	26.4413	24.8935	-86.265	-61.0966	-63.8579
ERVLE_8q22.3b	-4.14786	0	-24.7556	-44.7831	0	0	-36.7235	-49.9926	11.7219	-1.56297	-39.6661	-19.83	-65.6954	16.3786	-26.5967	-40.9927	-94.6099	9.27831	-8.09508	16.4225	-14.8554	-56.9909	-61.5424	-49.4376	-57.0356	6.72363	-86.8604	-49.8813	-30.0123	-51.1054	-31.7218	-56.0345	-50.2122	-4.7837	-68.6763	0	-24.9544	-58.8047	4.4015	13.2568	-29.1391	-50.494	-53.8612	-34.6515	26.9754	26.7688	-98.0008	-75.5955	-79.5109
ERVLE_8q24.11	0	0	0	0	0	0	0	0	0	0	0	0	0	0	0	0	0	0.816937	0	0	0	0	0	0	0	0	0	-1.26579	0	0	0	0	0	0	0	0	0	0	0	0	0	0	0	0	0	0	0	0	0
ERVLE_8q24.22b	-2.71596	15.1356	0	-19.0332	-5.52071	0	0	-17.6425	20.1344	-4.41166	-15.0129	-16.9984	-36.4144	22.3758	0	-22.9628	-43.4678	14.53	-13.4526	0	0	-29.0099	-40.2468	-22.9181	-21.3529	11.3536	-26.8405	-33.6975	-17.217	-30.2137	0	-38.6991	-26.5669	-4.28221	-30.3786	-6.87681	0	-28.9202	10.9726	15.3779	0	-34.1863	-21.6637	-16.0666	14.5606	15.6301	-42.0109	-38.516	-25.978
ERVLE_8q24.3h	0	13.7809	-16.0454	-23.4164	0	13.1713	-21.9576	-38.7541	8.49882	0	-33.2499	-9.98027	-43.9841	0	-28.7904	-22.1392	-59.3731	0	-9.90861	3.30098	0	-32.953	-38.8479	-40.5672	-30.9716	0	-44.2862	-33.5829	-10.6023	-30.8205	-18.3012	-25.3364	-29.6666	0	-50.728	0	-24.2841	-50.1188	2.01613	0	-14.9395	-42.3988	-39.1396	-30.5754	17.5266	11.3042	-60.4573	-59.7179	-40.9364
ERVLE_8q24.3i	-0.681288	0	0	-14.1724	0	0	-12.5042	-9.99153	0	-2.41556	0	-5.52954	-13.4373	0	0	0	-16.2379	0	-5.14492	0	0	0	-11.4267	-12.6655	-14.0071	0	-15.3946	-13.0551	0	-10.7111	0	-10.9231	0	-1.19691	0	0	0	-12.5518	0	0	-8.41801	-13.715	0	0	0	8.01996	-23.1957	-16.7857	-18.5118
ERVLE_8q24.3j	0	0	0	0	0.00914124	0.072759	0	0	0.797315	0	0	0.0974995	0	0.798304	0	0	0	0	0.00657916	0.195995	0	0	0	0	0	0.143477	0	0	0.16	0	0	0	0	0	0	0.00648859	0	0	0.00652208	0.464065	0	0	0	0	0.986345	0.180493	0	0	0
ERVLE_9q21.13c	0	0	-28.6785	-56.4242	-7.19885	9.94388	-44.1948	-54.2006	15.2052	0	-46.9588	-25.8207	-73.5266	16.2357	-34.1879	-53.5072	-110.926	10.3596	-9.55746	10.9356	-11.5751	-59.9172	-75.9006	-52.1252	-55.2702	0	-90.5926	-61.9926	-31.3158	-58.6019	-36.2448	-58.8166	-54.4144	-2.54465	-86.8237	0	-36.7554	-61.5625	0	0	-36.6684	-61.3832	-72.3314	-43.7187	23.2314	20.4384	-109.176	-92.478	-81.1729
ERVLE_9q32a	-4.65777	14.945	-17.3662	-46.5033	0	23.4813	-28.7667	-36.3056	24.8449	-3.24941	-24.5253	-17.1966	-50.1643	23.8444	0	-34.3171	-69.6363	24.2785	-10.9076	11.5945	-9.71789	-35.9922	-52.5797	-36.8869	-40.5651	12.2468	-63.2629	-49.4395	-23.3183	-38.6627	-20.0449	-48.8918	-35.175	0	-55.4726	-7.86108	-28.7498	-46.324	10.0981	13.0751	-28.1437	-38.6187	-41.1886	0	31.1728	28.3404	-77.8065	-58.0664	-52.5076
ERVLE_9q33.2b	0	0	0	0	0	0	0	0	0.759673	0.0317229	0	0	0	0	0	0	0	0	0	0	0	0	0	0	0	0	0	0	0	0	0	0	0	0	0	0	0	0	0	2.87092	0	0	0	0	0	1.2086	0	0	0
ERVLE_9q34.2	-1.05203	0	0	0	-3.30375	0	0	0	0	0	0	0	-9.12214	0	0	0	0	0	0	0	0	0	0	0	-5.36564	0	0	0	0	0	0	-5.96111	0	-1.10153	0	0	0	0	0	0	0	0	0	0	0	0	0	0	0
ERVLE_Xp11.4b	0	0	0	0	0	0	0	0	-2.11323	0	0	0	0	0	0	0	0	0.10937	0	0	0	0	0	0	0	0	0	0	0	0	0	0	0	0	0	0	0	0	0.0373815	-2.38349	0	0	0	0	0	0	0	0	0
ERVLE_Xq22.1a	-5.24864	20.2409	-26.0663	-49.0075	-14.7391	19.1257	-34.0097	-44.2371	31.0705	-3.69508	-37.7286	-17.2774	-64.5162	28.9872	-25.2579	-40.537	-88.3911	20.3895	-12.3158	13.0905	-10.3743	-49.1408	-64.6212	-39.9375	-49.6308	11.0084	-69.3399	-55.6325	-27.0403	-51.8817	-30.9638	-55.0732	-44.4784	-3.86786	-74.2497	-9.34739	-34.0376	-53.7582	10.7343	13.2286	-17.8616	-44.5288	-52.8029	-27.3193	24.1928	23.6122	-90.1141	-76.7487	-68.281
HARLEQUIN_10q22.1	-3.97427	0	0	0	-6.08414	0	0	0	0	-2.01584	0	0	0	-12.2616	0	0	0	0	-9.90365	0	13.2951	0	0	0	0	0	0	0	0	0	0	-10.6427	0	0	0	-4.00854	0	-12.3611	0	9.24958	0	0	0	0	0	0	0	0	0
HARLEQUIN_11q22.1b	0	-3.65873	-12.5994	-15.6816	0	-1.54676	-10.0392	-18.7989	0	0	-14.4035	-9.5794	-26.9346	0	-12.0458	-17.3504	-39.2234	0	-8.74359	3.30092	-8.17294	-23.7795	-25.5971	-15.6286	-20.1718	0	-36.6155	-21.9162	-14.5973	-21.4063	-12.133	-18.7751	-21.7039	0	-31.7665	-6.11274	0	-22.9121	1.49817	0	-6.75382	-21.531	-27.0729	-13.4684	0	9.89152	-38.3768	-30.4792	-31.1214
HARLEQUIN_12p13.32	-3.95311	13.5814	-13.7478	-30.1603	0	0	0	-23.8805	19.884	-3.53687	0	-11.6885	-33.5001	19.4809	0	-28.6734	-38.0357	11.9532	-6.25436	12.3259	0	0	-32.0062	-20.1409	-32.3648	9.83372	-28.8654	-26.0077	-18.0092	-19.9608	-20.1275	-29.1785	-17.2585	0	-30.9044	0	0	-31.5425	8.13197	10.5398	-23.1166	-17.1179	0	0	23.1441	21.5316	-41.3616	-36.9184	-27.0896
HARLEQUIN_17q21.33	-1.38834	0	0	0	-2.25795	0	0	-6.82057	0	0	-8.14663	0	-12.5041	0	-6.2242	-5.88065	-10.1288	0	0	0	0	0	-4.57694	-6.82014	-12.4331	0	-7.03597	-5.85632	0	-11.7897	-4.8625	-8.49178	0	-1.37112	-17.4836	-2.41176	0	-5.21952	0	0	0	0	0	0	0	0	-14.3218	-16.1497	-9.19854
HARLEQUIN_19p12b	0	0	0	0	0	0	0	0	0	0	0	0	0	0	0	0	0	0	-5.94884	0	0	0	0	0	0	0	0	0	0	0	0	0	0	0	0	-3.89528	0	0	0	0	0	0	0	0	0	0	0	0	0
HARLEQUIN_19p12e	0	0	0	0	0	0	0	0	0	0	0	0	0	0	0	0	0	0	-1.26943	0	0	0	0	0	0	0	0	0	0	0	0	0	0	0	0	-0.493429	0	0	0	0	1.09438	0	0	0	0	0	0	0	0
HARLEQUIN_1p13.2b	-4.25623	9.67101	0	-25.4494	-8.39847	0	0	-16.1193	0	-3.30068	0	0	-24.3195	0	0	-17.6016	0	10.0118	-11.2954	5.57073	11.5774	0	-20.383	0	-15.9435	9.08137	0	-20.1479	-12.193	0	0	-21.2412	0	0	0	-6.39934	0	-25.2144	9.54073	14.2045	0	0	0	0	13.2714	15.4665	0	-23.5872	0
HARLEQUIN_1p33	-1.91223	0	0	0	0	0	0	0	0	0	0	0	0	0	0	-3.94629	0	0	0	0	0	0	0	0	0	0	0	-4.56903	0	-7.5964	0	-6.93657	0	-1.95606	0	0	0	0	0	0	0	0	0	0	0	0	0	-9.74115	0
HARLEQUIN_1q32.1	-3.72529	23.4847	-22.6036	-47.0422	-12.5016	14.0342	-25.7226	-50.9275	14.9701	-3.49288	-35.8862	-39.7624	-75.5008	17.3649	-24.0287	-51.0266	-92.6077	19.2661	-10.453	10.1856	0	-56.5137	-86.3289	-65.9363	-52.5327	13.1278	-61.5798	-75.4638	-35.2349	-69.928	-26.3806	-74.297	-49.4584	0	-72.4776	0	-35.135	-83.4149	7.89616	15.9432	-26.4129	-82.3133	-51.0211	-35.2379	23.0443	20.2975	-110.163	-88.4818	-57.1222
HARLEQUIN_1q32.3	0	-2.37878	0	0	0	0	0	0	0	0	0	0	0	0	0	0	0	0	-6.30869	0	-5.77678	0	0	0	0	0	0	0	0	0	0	-7.44865	0	0	0	-4.1582	0	0	0	0	0	0	0	0	0	0	0	0	0
HARLEQUIN_20p12.1	0	0	0	-16.5788	0	0	-12.9415	-21.7096	0	0	-19.8539	-12.2156	-25.0888	12.1551	-15.6095	-16.3685	-42.8877	0	-6.71693	4.09823	-8.08949	-28.8718	-24.2824	-22.9585	-17.3483	0	-43.2467	-22.0434	-10.4306	-22.3572	-9.97278	-20.3694	-22.4161	-1.8166	-35.3155	0	0	-26.5815	0	0	0	-23.1306	-28.0546	-19.0856	13.2655	9.62857	-44.5443	-33.8907	-38.1647
HARLEQUIN_2q12.3	-0.716807	0	0	0	0	0	0	0	0	0	0	0	0	0	0	0	0	0	0	0	0	0	0	0	0	0	0	0	0	0	0	0	0	0	0	0	0	0	0.0287495	0	0	0	0	0	0	0	0	0	0
HARLEQUIN_2q32.1	-4.86262	20.4195	-17.8629	-56.1514	0	10.5502	-30.0099	-46.8572	32.5317	-3.40995	-37.1089	-25.5099	-69.5784	41.6826	-22.3224	-50.5725	-107.927	25.561	-9.57238	15.2398	-9.93487	-56.4488	-75.6262	-48.817	-52.9045	13.5019	-80.903	-66.9189	-28.1687	-54.8189	-28.3106	-61.2011	-47.7525	0	-68.3718	-6.12285	-30.5791	-62.349	10.1952	17.2061	-26.3062	-57.6881	-54.2116	-32.1696	35.6902	26.9371	-102.571	-82.6647	-71.2106
HARLEQUIN_2q34	0	0	0	0	0	0	0	0	11.8373	0	0	0	0	0	11.1976	0	0	10.2215	0	0	3.64011	0	0	0	0	3.04333	0	5.62475	0	0	0	0	0	0	0	0	0	0	0	0	0	0	0	0	0	6.00628	0	0	0
HARLEQUIN_4p14b	0	0	0	0	0	0	0	0	9.31261	-1.2145	0	-2.09017	0	0	0	0	0	0	0	2.80009	0	-11.0074	-6.29033	-9.02845	0	0	0	0	0	0	0	0	-9.12204	0	0	0	0	-10.7096	0	0	-7.5048	0	0	0	5.04733	0	0	0	0
HARLEQUIN_4p15.2	0	0	0	0	-5.26137	0	0	0	0	-1.41208	0	0	0	0	9.84879	0	0	0	-10.0265	4.14897	0	-13.0808	0	-10.7693	0	5.348	0	0	0	0	0	-11.993	-11.2201	-3.24457	0	-5.40137	0	0	0	14.3709	0	0	0	0	11.9934	9.00511	0	0	-15.4944
HARLEQUIN_4q13.2a	0	0	0	-8.58397	-5.29534	0	0	-14.0412	0	0	0	-7.20719	-12.6877	0	0	0	-18.499	0	-6.58215	-0.664537	0	-13.3289	-10.7896	-13.0913	0	0	-22.1141	-9.30694	-5.26929	-13.5713	0	-9.50302	-9.31613	0	-17.4055	-4.29464	-9.17865	-16.1503	0	0	0	-14.0056	-15.8187	0	0	0	-23.7062	-21.6849	-19.865
HARLEQUIN_4q32.1	0	0	0	-6.24718	-4.23495	0	0	-10.0722	2.66759	0	0	0	-13.2589	0	0	0	-13.6388	0	-0.356406	0	0	-7.16099	-10.3735	-12.2184	-8.70332	0	-12.3575	-8.99048	0	-7.85754	0	-7.94578	-5.45881	0	-10.4277	0	0	-15.7877	0	0	0	-13.7466	-8.53969	0	6.12408	0	-16.3813	-13.3279	-10.7233
HARLEQUIN_5q12.3	0	0	0	0	0	0	0	0	0	0	0	0	0	0	0	0	0	0	0.0299498	0	0	0	0	0	0	0.3014	0	0	0	0	0	0	0	0	0	0.024795	0	0	0	0	0	0	0	0	0	0	0	0	0
HARLEQUIN_5q14.2	-4.14103	15.441	0	-37.3961	-8.08814	12.102	0	-26.1886	19.0028	-2.67567	-19.5443	-35.1598	-58.4482	20.3077	0	-51.3187	-74.4125	12.6205	-13.0587	9.17905	0	-35.6057	-68.4569	-32.9181	-32.6714	14.3767	-47.7569	-65.4261	-33.5072	-50.4853	-13.969	-61.422	-29.3951	-2.53654	-41.8161	-8.15117	0	-42.2587	8.32475	22.2625	-17.0679	-53.5875	-33.278	0	0	18.3505	-81.3345	-51.2948	-42.1882
HARLEQUIN_5q23.1	0	0	-12.1807	-23.3072	0	0	0	-15.7429	0	0	0	-17.2864	-30.6708	0	0	-21.9145	-41.3269	0	-6.00758	8.65205	0	-23.4256	-37.9846	-14.423	-15.9447	0	-32.0241	-33.0154	-17.294	-21.8468	-13.3884	-22.2925	-18.9853	0	-24.3496	0	-16.5985	-22.6633	2.02303	0	-10.3953	-31.8037	-26.7493	-14.2599	0	16.0105	-43.1984	-28.1926	-24.9266
HARLEQUIN_5q33.3	0	5.32979	0	0	0	2.55831	0	0	6.24053	0	0	0	0	5.04497	0	0	0	3.83912	0	0	0	5.42364	0	0	0	3.06834	0	0	0	0	0	0	0	0	0	0	0	0	0.981426	0	0	0	0	7.00461	0	0	0	0	0
HARLEQUIN_6p21.32	0	0	0	-14.1493	0	0	0	-11.2206	0	-1.28931	0	-8.54848	0	0	0	-11.4576	-20.2359	0	-5.57291	5.41243	0	0	-19.7185	0	0	0	0	-14.3115	0	-14.99	0	-17.5696	0	0	-20.6494	0	0	-18.6765	5.10393	8.44987	0	0	0	0	23.0557	14.6227	0	0	0
HARLEQUIN_6p21.33	-4.58853	12.747	-15.8462	-36.4183	0	0	-24.9859	-31.5977	10.7563	-2.81431	-28.7434	-11.6243	-45.0025	0	0	-29.5725	-69.5964	14.9267	-8.12705	0	-8.35148	-39.9202	-49.1722	-32.7399	-28.6379	8.65858	-55.3779	-41.1146	-15.1117	-29.5429	-19.6407	-37.0095	-33.4733	0	-49.4127	-5.74105	-27.6924	-47.0068	7.70267	10.9304	-17.4656	-41.3375	-43.9891	-21.5265	17.1221	16.6243	-65.0586	-55.2043	-49.6791
HARLEQUIN_6q23.1	0	0	0	0	0	0	0	-14.3804	0	0	0	-7.93959	0	0	-9.94198	0	0	0	0	0	0	0	0	-17.094	-11.3485	0	-18.7451	0	-5.4276	-14.4747	0	-10.128	0	0	-15.5711	0	0	-20.3441	0	0	0	-14.1213	-12.0167	0	0	0	-22.1309	-18.17	-14.9917
HARLEQUIN_7p14.3	0	0	0	0	0	0	0	0	0	0	0	0	0	0	0	0	0	0	0	0	3.14147	0	0	-7.14401	0	5.41598	0	0	0	0	0	0	0	0	0	0	0	0	0	0	0	-7.88403	0	0	0	0	0	0	0
HARLEQUIN_7q22.1	-1.51791	6.14809	0	-12.489	0	0	-17.3511	-10.6999	5.73963	0	-10.7921	0	-21.1408	0	0	-8.27344	-25.6067	4.61341	0	0	-5.08825	-9.03786	-7.41778	-14.6018	-14.1954	0	-26.5118	-6.86669	0	-13.0234	-7.84476	-13.9345	-11.2625	0	-24.0638	0	-8.98839	-8.75035	0	6.38453	-8.51289	-9.68821	-11.2306	0	0	0	-29.8233	-20.0182	-23.3165
HARLEQUIN_7q32.1a	-2.31999	0	0	0	0	0	-12.5409	-15.1761	8.3289	0	-15.6502	0	-18.0365	0	0	-10.2123	-31.1561	7.90055	-5.43202	0	0	-27.2803	-19.112	-21.3829	-12.796	0	-27.4499	-9.97821	0	0	-9.96707	-13.0013	-24.4515	0	-22.7515	-5.31219	-17.6831	-27.0213	0	0	-11.381	-24.4419	-23.8775	-19.2242	3.51541	0	-25.9494	-31.1501	-22.4124
HARLEQUIN_7q33a	0	9.44479	-9.60107	0	-7.39323	3.22597	0	-15.6418	9.60128	0	0	0	-16.5345	9.16593	-14.8297	0	0	6.60251	-5.90228	4.61114	0	0	0	-27.6691	-16.707	0	-39.461	-12.1922	0	-18.2025	0	-15.4473	-18.0777	-2.29804	-28.1121	-4.36223	-13.6617	-31.5902	0	0	0	-25.462	-20.2658	0	0	8.30048	-32.3514	-28.0723	-27.2754
HARLEQUIN_Xq11.1	0	2.48119	-5.2474	-12.5328	0	3.37206	-11.4545	-9.00258	0	0	-7.46875	0	-7.35107	4.88395	-7.44266	-4.90778	-18.4634	1.85738	0	2.30314	-5.86351	-8.84855	-8.85801	-8.20305	-9.87102	0.989655	-15.9164	-10.3464	-5.9419	-6.9754	0	-10.653	-7.70565	0	-13.5914	0	-8.39878	-12.4551	0	0	-7.51813	-8.18966	-11.8484	0	8.59657	7.03329	-16.4211	-14.0958	-16.5962
HARLEQUIN_Xq23b	0	0	0	0	0	0	0	0	0	-0.897402	0	0	0	0	0	0	0	0	-2.88007	0	0	0	0	0	0	5.04008	0	0	0	0	0	-13.1305	0	0	0	0	0	0	0	0	0	0	0	0	0	0	0	0	0
HARLEQUIN_Yq11.221c	-5.37163	12.8274	0	-35.5788	-8.58561	0	-24.3322	-32.0364	22.042	-2.58204	-27.2957	-9.49356	-47.5378	20.685	0	-28.6748	-57.3331	19.1779	-6.07526	11.9112	0	-30.5172	-44.4586	-32.7276	-35.7956	10.7545	-46.456	-35.281	-17.0758	-41.1071	-21.5749	-42.3536	-31.4411	0	-52.7703	-4.54989	-20.9945	-37.4924	8.06545	18.1764	-19.3845	-31.0739	-27.8808	-19.3889	32.3068	22.8618	-57.8529	-55.8494	-40.0093
HERV3_11q14.1	0	0	0	0	0	0	0	0	0	0	0	0	0	-0.359075	0	0	17.5081	0	0	0	10.2554	9.30602	0	0	7.33878	0	20.6907	0	0	0	0	0	0	0	0	0	0	0	0	0	0	0	11.3345	0	0	0	13.8719	0	23.1959
HERV3_14q11.2	0	0	0	3.7295	0.486701	0	4.52182	3.67519	5.16543	0	4.72316	0	0	6.23409	5.73367	0	0	5.34759	1.37069	0	0	0	4.4792	2.51781	0	0	0	0	3.39619	4.04898	0	0	0	0	4.0648	1.24997	0	3.19078	2.03673	0	0	0	0	4.53081	0	0	0	0	0
HERV3_14q32.33	-1.48544	4.67456	0	-13.9112	0	0	-12.8921	-7.66524	0	-1.36731	0	0	-16.2564	0	0	-14.1347	-25.0748	0	-5.65266	3.83506	-6.45228	0	-11.9393	0	-11.6783	4.00045	-21.5984	-12.3271	0	0	-8.36453	-14.3198	0	-1.73249	-15.5609	0	0	-8.61425	0	0	0	0	-12.5445	0	0	8.89335	-22.9389	0	-20.5491
HERV3_19p13.3	0	2.22716	0	-5.35599	0	4.77774	-7.60677	-11.0936	3.82092	0	-8.04752	-5.6399	-13.535	0	-10.4664	0	-12.4645	0	0	1.57685	-2.21616	0	0	-10.815	0	0	-9.72444	0	-6.33208	-7.66571	0	-6.71648	-8.23075	0	-9.45557	0	0	-13.7415	0	0	0	-8.51002	-8.97427	-8.17427	0	2.8123	-12.2119	-8.88324	0
HERV3_19q13.33	0	0	0	-31.8835	0	0	0	-32.826	0	0	-22.7692	-23.2112	-44.3525	0	-22.3887	-24.6981	-75.2069	0	-7.85834	4.90308	-11.2776	-41.5608	-53.7161	-37.7701	-31.4265	0	-58.1199	-43.2725	-17.3959	-41.5036	-17.0803	-38.5306	-34.4615	0	-39.845	-6.19442	-17.2062	-42.5198	1.42548	7.80617	-12.8647	-47.3073	-41.599	-27.3337	26.6295	9.53033	-69.2473	-45.723	-52.2691
HERV3_1p34.3	-1.86341	12.5818	0	0	-5.2837	11.0504	-8.89538	0	0	-3.15189	0	0	0	0	0	0	0	0	-6.7096	-0.723535	0	0	-12.2873	0	0	0	0	0	0	0	0	0	0	-3.14821	0	-4.17357	0	0	0.37611	0	0	0	0	0	0	0	0	0	0
HERV3_21q22.13	-3.06967	7.22994	0	-15.1752	0	0	0	0	0	-1.76886	0	0	0	0	0	0	0	0	0	0	15.5607	0	0	-13.2285	0	0	0	0	0	0	0	0	0	0	0	-4.96445	-20.5111	0	0	0	-16.1927	0	0	0	0	0	0	0	0
HERV3_3q13.2	0	0	-9.63051	-19.472	0	0	0	-15.0219	6.73458	-1.82743	-12.5093	-5.72618	-17.7112	6.17373	0	-10.3862	-24.8579	0	0	11.7262	0	-12.3382	-19.5312	-12.5929	-15.6247	1.33658	-16.2708	-13.4252	-10.4717	-17.4548	-12.0294	-17.8194	-12.5705	-2.26046	-19.3865	0	0	-16.7812	0	6.37779	0	-11.5011	-14.2498	-10.7493	19.7465	20.7868	-22.2506	-21.1125	-14.2195
HERV3_4p16.1	-2.07044	5.87099	-12.0306	-25.5982	0	5.88709	-24.5584	-25.5188	7.09452	-1.34775	-22.3008	-9.51395	-29.4143	8.90011	-19.8509	-15.6936	-49.4769	10.2506	-5.13643	5.89009	-9.30897	-25.9362	-25.5593	-29.9648	-26.3344	0	-43.5933	-21.0644	-13.3831	-28.7855	-17.2299	-24.4181	-22.9435	-2.58807	-47.3599	0	-12.3886	-30.293	3.40486	0	-12.4373	-21.107	-32.3657	-22.2442	0	10.8786	-51.8474	-43.3701	-37.5555
HERV3_4q13.2b	0	0	0	0	0	8.16372	0	0	0	0	0	0	0	-3.08266	0	0	0	0	0	0	0	0	0	0	0	0	0	0	0	0	0	0	0	0	0	0	0	0	0	0	0	0	0	0	0	0	0	0	0
HERV3_7q11.21	0	0	0	0	0	0	0	0	0	0	0	0	0	0	0	0	0	0	0	0	0	0	0	0	0	5.19007	0	0	0	0	0	0	0	0	-10.6559	0	0	0	0	8.16625	0	0	0	0	0	7.85716	0	0	0
HERV3_7q33	0	0	-10.5418	-19.406	-5.32394	0	-16.0891	-25.2966	5.47458	0	-19.5948	-13.5846	-31.3556	0	-20.8686	-17.0435	-48.9184	0	-6.04738	6.3548	0	-23.4794	-23.802	-31.871	-25.9586	0	-46.2558	-24.6481	-12.4311	-30.3764	-14.6202	-28.6022	-22.4833	-2.27296	-44.7711	0	-17.6698	-33.2292	0	0	-9.87668	-28.8692	-26.161	-20.4556	13.6304	13.602	-55.205	-46.9255	-43.1617
HERV3_7q34a	-1.09795	4.90972	0	0	0	2.17099	-11.5126	0	5.29485	0	0	0	-6.32103	0	0	0	0	4.41082	0	0	0	0	-7.00507	-7.66585	-5.74568	0	0	0	0	0	-5.26083	-6.85414	0	0	0	0	0	-8.81119	0	0	-6.73853	0	0	0	0	0	-7.39819	-6.55961	0
HERV3_7q34c	-2.91036	2.24657	0	-10.0318	0	0	0	-9.95495	4.06198	-3.29235	0	0	-16.4444	0	0	0	-20.5689	6.31327	0	1.29272	0	0	0	-11.3212	-21.7047	3.9592	-19.7207	-7.65463	0	-11.6999	0	-13.0354	0	-2.4957	-19.557	0	0	-10.3038	0.296493	10.4892	-10.976	0	0	0	0	2.30346	-26.2802	-22.1766	-23.3067
HERV3_9q34.13	0	0.302711	0	0	0	0.468605	0	0	1.18234	0	0	0	0	0	0	0	0	3.25966	0.0629894	0.665349	0	0	0	0	0	0	0	0	0	0	0	0	0	0	0	0	0	0	0	0	0	0	0	0	0	1.97057	0	0	0
HERV30_3q25.2	0.969985	0	0	0	1.04417	0	0	0	0	0.70833	0	0	0	0	0	0	0	0	0	0.023628	0	0	0	0	0.715001	0	0	0	0	0	0.280693	0	0	1.03646	0	0	0	0	0	0	0	0	0	0	0	0	0	0	0
HERV30_8q24.23	-1.68449	0	0	-12.5637	0	0	0	0	0	-1.23942	0	0	0	0	0	-15.494	-23.9958	3.86939	0	8.19005	0	0	-18.7403	-8.56737	-13.5669	6.21822	0	-17.0548	0	-12.7796	0	-16.332	0	-0.741502	-18.7083	0	0	-13.9514	0	0	0	0	0	0	0	15.8309	-20.1384	0	0
HERV4_11q21	-3.72089	19.0102	-18.5001	-41.762	-9.58051	11.4531	0	-38.0853	17.6031	-3.34527	-22.6027	-33.523	-66.0529	19.2784	0	-39.0648	-87.9223	17.8817	-9.7885	0	-11.1558	-50.2474	-72.8618	-49.8346	-39.0056	8.72207	-73.5978	-61.8441	-26.8806	-53.9385	-22.5324	-58.5148	-44.8972	-3.70198	-55.6555	-7.16327	-24.0252	-62.8878	6.56882	14.834	0	-64.1043	-54.6271	-32.576	31.7861	16.5861	-95.8513	-66.2658	-61.236
HERV4_12p11.21	-2.32378	0	0	0	-6.83219	0	0	-16.1716	0	0	0	0	-17.3947	0	-13.8654	0	-17.7534	0	0	0	9.19907	0	0	-18.7326	-15.1375	0	0	-9.1451	-5.99083	-12.6661	0	-13.4731	-9.34423	-2.2454	-18.4928	0	-10.3819	-17.3887	0	0	0	-16.463	0	0	0	0	-20.1674	-21.6526	0
HERV4_13q32.3	0	0	0	0	0	-0.503908	0	-2.77224	-2.79804	0	0	0	0	-2.81418	0	0.658935	-2.51907	0	0	0	0	0	0	0	0	0	0	0	0	-0.850441	0	0	0	0	-3.87981	0	0.604366	0	0	0	0	0	-1.51288	0	0	0	-3.50434	-2.68989	0
HERV4_15q26.1	0	0	0	0	0	0	0	0	0	0	0	0	0	0	0	0	0	0	-2.76482	0	0	0	0	0	0	0	0	0	4.55011	0	0	0	0	0	0	0	0	0	0	0	0	0	0	0	0	0	0	0	0
HERV4_4q12	-2.54642	24.1852	0	-31.2193	0	0	-19.4523	-31.145	9.74831	0	-22.8535	-37.2736	-55.6345	12.6218	0	-34.0738	-50.237	0	-9.23762	0	8.72695	-23.5404	-59.285	-49.1716	-23.6512	0	-32.437	-55.7028	-25.0513	-51.3367	0	-52.2556	-23.8378	-2.73211	-46.6501	-8.48575	-19.386	-56.9435	0	0	0	-62.4077	-23.8882	-25.7682	0	10.0423	-74.5937	-52.6196	0
HERV4_5q22.2	0	0	0	0	0	0	0	-3.36034	-1.79698	0	0	0	-3.58433	0	0	0	-3.78527	0	0	0	0	0	0	-4.34447	-3.4322	0	-3.53828	-3.03291	0	0	0	0	0	0	0	0	0	-8.34028	0	0	0	-4.41561	0	0	-1.86027	-0.292397	0	0	0
HERV4_8q24.3	0	4.64744	0	0	0	0	0	-15.8427	0	0	0	0	-19.6354	0	-19.6493	0	0	0	0	0	0	0	-12.9044	-25.9785	-15.3268	0	-17.9532	0	0	-17.44	0	-13.2719	-13.7415	0	-21.0169	0	0	-30.7293	0	0	0	-19.7426	0	0	0	0	-29.6066	-20.1469	0
HERV9_10p13	0	10.4788	0	-27.3976	0	9.96899	-23.9412	-30.779	22.452	0	-25.0404	-13.6099	-42.645	28.2626	0	-15.4155	-67.5229	13.7637	-8.60087	10.4178	-11.8752	-46.0425	-38.9492	-37.9919	-35.18	5.0008	-66.5743	-30.2329	-8.97198	-35.5604	-13.345	-34.0176	-36.1357	-2.19706	-53.4509	-6.38191	-23.6533	-37.4745	6.11742	11.8232	-14.507	-36.9728	-43.7056	-26.1163	22.0954	20.9241	-67.7132	-51.73	-69.5456
HERV9_11q21	-0.93986	0	0	0	-1.64145	0	0	0	0	0	0	0	0	0.400414	0	0	6.5669	0	0	0	4.70903	5.15489	0	0	0	0	9.66388	0	0	0	0	0	3.34367	-0.932865	0	0	0	0	0	3.63818	0	0	7.64372	0	0	0	0	0	8.25756
HERV9_12q23.3	0	0	0	0	0	0	0	-2.00133	0	0	0	0	-1.87424	0	-1.86083	0	0	0	0.227359	1.67788	0	0	0	0	0	0	0	0	0	0	-1.86131	0	0	0.179816	0	0.329093	0	0	0	0	0	0	0	0	1.58221	0.134742	0	0	0
HERV9_12q24.32	0	0	0	0	0	2.57497	0	-3.74942	0	0	0	0	-2.8802	0	0	0	-4.58731	0	0	0	0	0	0	-9.4296	-2.47549	0	-10.4948	0	0	0	0	0	0	0	0	0	0	-10.0047	0	0	0	-9.34899	0	0	0	0	0	0	0
HERV9_15q21.1a	0	0	0	-8.22374	0	0	0	-14.444	0	0	0	0	0	0	-10.4844	0	0	0	0	0	0	0	0	-16.1666	0	-1.22351	-17.0821	-8.64411	0	-15.1204	0	0	-10.2832	0	-16.7531	0	0	-20.9302	0	0	0	-14.4553	0	0	0	0	-21.1542	-18.3645	0
HERV9_17q22a	0	-2.10616	0	-11.7932	0	0	0	0	-5.05323	0	0	-10.1064	0	0	0	-10.0024	0	0	-5.10946	0	-9.4817	-16.1144	-22.1434	0	0	0	0	-19.0713	0	-13.1514	0	-10.9294	-13.4914	0	0	0	0	0	0	0	0	0	-16.9637	0	0	0	-20.5075	0	0
HERV9_19p13.3	-0.0485226	0.74104	0	0	0	2.82474	0	0	2.91891	0	0	0	0	1.30181	0	0	0	0	0	0	0	0	0	0	0	0	0	-1.38069	0	0	0	-1.84744	0	0	0	0	0	-1.62275	0	0	0	0	0	0	0	0	0	0	-1.28346
HERV9_1p31.3	0	3.47037	0	0	0	2.66989	0	0	0	0	0	0	0	0	0	0	0	1.46419	0	0	0	0	0	0	0	1.00311	0	0	0	0	0	0	0	0	0	0	0	0	0	0	0	0	0	0	0	0	0	0	0
HERV9_3p24.3	-1.70193	7.13467	0	-16.509	-5.87653	0	0	-18.1152	0	-1.10866	0	-11.3126	-23.1496	0	-14.505	-13.7864	0	0	-5.53614	0	8.66102	0	-24.6952	-25.6069	0	0	0	-22.0472	-10.3433	-20.9544	0	-22.2476	-12.542	-1.82012	0	-3.65919	0	-31.1007	0	0	0	-31.8749	0	0	0	0	-22.5929	-22.2623	0
HERV9_3q25.1	0	0	-10.1851	-10.1249	-4.35885	0	-8.25017	-10.1383	3.88012	-2.72644	-11.2951	0	-13.6301	0	-8.43478	-11.0528	-19.1847	2.86786	0	0	-5.48238	-11.4418	-12.8706	0	-12.2933	0	-17.9183	-10.1249	-6.80412	-11.4693	-9.0747	-12.4768	-10.8729	-3.65763	-16.1231	0	-8.07951	-8.99818	0	4.3521	0	0	-11.0714	-7.04412	0	0	-19.0394	-15.0079	-17.7791
HERV9_4p14	0	21.0095	0	-37.0269	0	16.3412	-23.3346	-39.1665	33.4055	-4.38745	-26.2409	-20.8315	-58.4933	29.733	0	-30.1459	-79.2764	20.0937	-9.41221	12.5463	0	-46.2393	-65.9056	-48.2986	-41.2983	17.5203	-63.0846	-58.7802	-21.5813	-47.4635	-16.7089	-56.6125	-42.0001	0	-50.1409	-6.24521	-26.8174	-62.2026	10.3576	19.3333	0	-57.4714	-42.442	-27.7854	26.8131	23.0079	-81.3173	-62.9658	-57.2336
HERV9_5q31.2	-0.652306	0	0	-13.2457	0	0	0	-9.93941	0	0	-8.73867	-6.54164	-8.10238	0	0	-14.0431	-14.5385	0	0	5.31276	3.24667	-6.84608	-16.7377	-10.6165	-12.1651	2.89546	0	-17.6269	-9.21164	-14.4173	-8.85871	-12.6267	0	0	-9.70673	0	0	-16.0708	2.04689	0	-10.8439	-15.0892	0	0	11.6368	8.23793	-17.2933	-12.0129	0
HERV9_7p14.2	0	19.969	-13.8836	-34.1159	0	12.6261	-19.2856	-34.1009	14.2944	0	-22.1192	-31.2725	-51.0654	0	-25.0004	-30.9275	-58.1175	0	-6.6114	7.423	-10.0269	-41.3159	-59.7059	-41.5588	-34.3396	0	-58.2295	-54.0083	-27.6354	-49.4355	-15.9998	-51.445	-37.734	0	-49.9614	-6.67326	-22.5306	-54.8593	2.20935	0	-16.4398	-56.2129	-43.1817	-26.7279	30.5528	18.2421	-78.6146	-55.4986	-52.0352
HERV9_Xq23b	-3.81166	0	0	0	-8.52652	0	0	0	0	-2.30079	0	0	-23.4539	0	0	0	0	4.46859	0	0	0	0	0	-25.9194	-13.2936	0	0	-15.6535	0	-18.8072	0	-20.8933	0	-3.26949	-20.94	-4.13863	0	-30.1628	0	0	0	-24.0869	0	0	0	0	-27.476	-18.4763	0
HERVE_10p11.21	-3.65778	0	0	-16.4979	-7.80712	0	0	-16.691	0	-3.29796	0	-8.1505	-29.12	0	0	0	-21.5871	12.2181	-11.3796	0	0	0	-23.1482	-17.8464	0	10.6719	0	-18.5386	-13.2061	0	0	-27.393	-13.6994	0	-28.1681	-8.09973	0	-31.4817	6.72369	13.0292	0	-18.2915	0	0	0	0	-22.7498	-28.3258	0
HERVE_10p13b	0	0	0	-15.1523	-9.25976	0	0	-13.493	0	-1.16505	-17.3447	-5.92377	-30.9331	0	0	-17.9108	-27.4935	0	-8.34632	0	0	0	-21.323	-13.715	-13.3044	7.7662	0	-19.8028	-10.0877	-17.4686	0	-26.2317	0	0	-25.5878	-5.14257	0	-16.8537	0	0	0	-13.9873	0	0	0	12.6832	-26.0489	-22.2636	0
HERVE_10p13c	0	8.96372	0	-34.911	0	10.2085	0	-29.1514	14.9583	0	0	-29.5823	-49.451	0	-20.0887	-28.2214	-60.6918	0	-7.87131	6.59137	-11.0958	-38.3146	-61.425	-33.2489	-26.3862	0	-54.6783	-53.6584	-24.5394	-47.0038	-18.5619	-42.4318	-29.9319	0	-45.2855	0	0	-46.0475	1.79362	0	0	-47.9463	-38.2747	-21.8172	29.2098	13.7193	-75.5658	-50.0787	-44.2115
HERVE_11p15.4	-5.16997	16.4786	0	-28.1887	-9.55465	11.6949	0	0	13.1977	-3.66092	0	-15.2528	-35.2952	0	0	-25.7324	0	17.9608	-10.2336	0	13.4857	0	-31.9864	0	0	11.3333	0	-34.2051	-23.5066	0	0	-37.55	0	0	0	-8.56289	0	-28.9926	10.4682	13.8773	0	-26.2535	0	0	0	18.8156	-34.0429	-24.2514	0
HERVE_11q13.2b	-5.16142	20.2111	-21.449	-53.2367	-11.3685	0	-28.0389	-43.4672	18.1447	-5.6724	-25.71	-31.5717	-61.8809	0	0	-49.9937	-85.1218	21.8591	-16.3787	11.578	0	-47.671	-74.1695	-42.2616	-47.3174	12.3528	-68.7751	-63.323	-35.4696	-53.4971	-29.1204	-60.5415	-43.9422	-5.84383	-67.2635	-11.8736	-33.1893	-64.9302	13.6469	14.7302	-32.6412	-63.5618	-55.9414	-23.3451	17.9449	25.0277	-93.8506	-78.0391	-61.7597
HERVE_11q13.4c	-4.57395	13.0447	0	-33.8521	-11.7917	0	0	0	0	-3.1799	0	-15.2443	-38.873	0	0	-29.9909	0	16.5474	-15.5298	0	12.9253	0	-38.1985	-17.2778	0	10.6254	0	-35.6766	-22.9629	-21.3888	0	-39.1395	0	0	0	-10.1397	0	-34.7952	10.8298	15.7246	0	-23.7639	0	0	15.4137	15.2846	-33.6322	-24.7348	0
HERVE_11q13.4d	-2.34408	3.29945	0	0	-1.87833	0	-13.717	-12.6925	0	0	-10.0422	0	-18.6785	0	-8.57441	-7.56117	-22.035	4.27606	0	3.74855	-10.4031	-15.1405	-12.3382	-17.8495	-19.8317	0	-33.3969	-8.21225	0	-12.2023	-8.35667	-17.0585	-11.1024	-1.90314	-19.618	0	0	-15.9919	0	0	-14.0575	-8.60946	-14.9041	-7.21022	8.81571	7.31329	-27.5387	-16.3381	-30.3615
HERVE_11q13.4e	-0.659543	4.64497	0	0	-2.52826	0	0	0	0	-1.21518	0	0	-14.8055	0	0	0	-10.7287	3.66687	-1.16886	0	-5.50387	-7.15036	-6.94719	-14.0477	-10.0801	0	-16.0775	-5.88103	0	-11.552	0	-12.4457	0	-0.834693	-17.6071	-1.93588	0	-6.93242	0	0	0	0	0	0	0	4.11582	-21.0715	-12.5602	-18.7969
HERVE_12p13.31a	0	5.76029	0	-8.28275	-6.26301	10.5982	0	-9.66635	6.80603	0	0	0	-9.20178	0	-7.60112	0	-17.3683	4.63189	0	6.50021	-4.61969	-13.5767	-11.7607	-8.84976	-13.2821	0	-20.4439	-10.4148	-4.86398	-10.3955	-6.50944	-10.8294	-10.5067	0	-16.6329	0	0	-10.8777	0.0786889	0	0	-8.00283	-17.2669	-7.21039	9.66224	5.67595	-19.8534	-15.7524	-22.4187
HERVE_12q24.32	0	0	0	0	0	1.88529	2.85215	0	0	0	0	1.77688	0	0	0	0	0	0.207515	0	0	0	0	0	0	0	0	0	0	0	0	2.53885	0	0	0	0	0	0	0	0	0	0	0	0	0	0	0	0	0	0
HERVE_17q11.2	-3.55647	0	0	-37.8315	0	0	-24.1964	-24.6921	0	-3.31359	-19.0295	-13.0106	-41.0111	0	0	-29.8724	-58.665	11.4375	-13.2652	0	0	-28.033	-42.0263	-27.5106	-25.8173	8.93278	-29.2302	-37.3354	-16.6546	-27.5002	-17.8591	-39.967	-25.6259	0	-44.9969	-8.30874	-19.9305	-46.2936	8.85227	11.3087	-15.4323	-28.8039	-27.7389	0	0	19.1401	-55.6548	-44.6395	0
HERVE_19p12	-3.43462	17.832	-14.7011	-28.4006	-14.2242	13.0603	-20.8525	-29.3857	16.0182	-5.70507	-26.0781	-14.168	-40.4687	0	0	-21.7489	-54.4525	11.5858	-10.8228	0	-9.37563	-39.2361	-42.5913	-34.2083	-36.4178	7.95523	-55.3398	-34.9138	-12.0349	-34.215	-13.3136	-43.4193	-33.5304	-5.13815	-47.137	-7.47322	-22.2481	-44.688	6.74963	9.74978	-13.1247	-39.6702	-41.8078	-24.2157	16.7293	17.5014	-60.9628	-55.1338	-52.8954
HERVE_19q13.41	0	0	-15.8871	-27.8888	0	0	-34.2416	-31.1437	0	0	-29.9088	-6.49475	-42.4021	7.99921	-20.271	-19.4518	-67.9084	0	-8.16319	9.64565	-13.3118	-43.4918	-36.1112	-33.6959	-37.7904	0	-72.1941	-25.8	-10.2942	-32.2208	-20.3617	-31.7123	-36.0508	-2.10979	-56.3343	-3.6183	-20.9142	-35.8149	0	0	-22.9973	-27.9783	-49.5389	-28.8554	25.2324	19.266	-64.2375	-53.7386	-64.0795
HERVE_1p36.12	0	8.28839	0	-14.219	-7.35101	7.03881	0	-17.2727	0	-3.65222	0	0	-21.5246	0	-16.0092	0	-20.6059	0	0	0	10.469	0	-21.5617	-27.8052	-12.7623	0	0	-19.4308	0	-21.4036	0	-17.3736	-14.3797	0	-24.7406	0	0	-35.3467	3.26019	0	0	-27.2288	0	-15.6025	0	0	-24.3091	-27.3683	0
HERVE_20p11.21b	-5.51668	0	-13.3376	-16.3263	-8.05364	0	0	-22.238	0	-3.56653	-19.9383	-14.2173	-40.9333	0	0	-15.889	-43.271	10.6034	-16.5966	0	9.28055	-23.8888	-34.7006	-32.0059	-18.6434	6.35312	-22.8298	-25.7046	-14.8994	-21.6113	-14.2005	-38.1982	-23.2174	-3.23988	-29.4982	-10.9537	-17.598	-37.3999	6.38176	11.6841	-15.3918	-39.3927	-19.2952	-17.834	0	10.6389	-38.568	-34.4773	0
HERVE_2p13.3a	0	0	0	0	0	0	-11.3467	0	0	0	0	0	0	0	0	0	0	0	0	0	0	0	0	-8.61596	0	3.96022	0	0	0	0	0	0	-6.32021	0	-13.3503	0	0	0	0	6.76939	0	0	0	0	0	0	0	0	0
HERVE_2p14a	0	7.45587	-11.538	-20.46	-8.59567	0	-15.7211	-31.8059	14.0856	0	-23.3009	-12.6958	-38.3413	20.012	-24.7704	-21.2515	-57.069	0	-5.47455	7.67833	-12.7643	-35.1188	-32.5222	-34.5402	-33.2482	0	-57.5421	-27.8519	-13.3448	-33.2764	-15.1046	-30.3516	-27.7294	-2.50179	-46.4459	-4.21829	-18.6785	-40.7319	2.82669	0	-11.5237	-28.6551	-30.8339	-22.538	19.4267	11.5523	-60.5969	-44.3946	-52.1433
HERVE_2q37.1	0	15.899	0	-14.1006	0	8.56989	0	0	0	-4.85389	0	-11.7194	-18.0008	0	0	0	0	7.01381	0	0	7.06489	0	-16.9914	-22.9133	-14.483	11.191	0	-18.3479	0	-18.405	0	-21.5491	-13.865	0	0	0	0	-25.7238	7.11582	13.145	0	-27.288	0	0	0	0	-21.6032	-24.8723	0
HERVE_3p12.3a	0	0	0	0	0	0	0	-5.11543	0	0	0	0	-5.30466	0	0	0	0	0	0	0	0	0	0	-10.9481	-4.91957	0	-10.6783	0	0	0	0	0	0	0	-4.52792	0	0	-13.4378	0	-0.00763246	0	-10.3412	0	0	-0.00789573	0	-4.43818	-5.16001	-3.16607
HERVE_3p26.3	-3.97975	18.7874	-24.4555	-63.3708	0	17.8873	-43.2033	-59.0441	30.6701	-3.65578	-42.8858	-45.5681	-82.9299	39.9576	-30.6937	-60.4126	-115.093	24.3256	-8.15498	10.5665	0	-62.1341	-94.5164	-65.9585	-57.3662	11.6918	-86.3936	-83.9294	-40.1467	-75.1366	-31.8499	-77.7864	-60.2806	-4.26932	-82.5362	0	-43.9113	-77.8421	9.34602	14.2349	-39.2972	-74.8011	-65.4463	-43.4159	35.4572	28.3119	-124	-94.4492	-71.1536
HERVE_4p16.1c	-4.60481	13.5974	-17.4558	-48.162	-9.98873	13.5044	-21.8564	-36.4683	18.0619	-3.73858	-25.4431	-18.3304	-55.4031	19.5299	0	-45.0551	-78.1861	21.1598	-13.4483	11.6233	-9.25265	-43.4579	-63.3524	-36.4747	-40.7211	12.936	-68.083	-55.3971	-26.7775	-42.0212	-23.6209	-49.1017	-40.6656	0	-53.2084	-9.54143	-28.1383	-54.0702	9.77473	13.4105	-18.7859	-44.7326	-46.6805	-21.8388	21.7209	26.7269	-80.5185	-60.9396	-59.5772
HERVE_4q31.22	-1.16573	0	0	0	-1.97072	0	0	0	0	-0.676507	-7.38655	0	-5.86488	0	0	0	0	0	0	0	0	0	0	-4.64005	0	0	0	0	0	-5.31529	-2.68023	-5.60605	0	-1.15459	-9.54188	0	0	0	0	0	0	0	0	0	0	0	-4.96454	-6.14213	0
HERVE_5q14.3a	0	0	0	-11.5853	-5.01944	0	0	0	0	0	0	-6.90275	-12.1002	0	0	-12.4721	0	0	0	0	0	0	-16.6058	0	0	0	0	-16.6622	-9.00566	0	0	-12.0308	0	0	0	0	0	0	0	0	0	0	0	0	0	0	-13.2251	0	0
HERVE_5q14.3b	0	0	0	0	0	0	0	0	0	0	0	0	0	0	11.5574	0	0	0	0	0	0	0	0	0	0	5.9153	0	0	0	0	0	0	0	0	0	0	0	0	0	8.88772	0	0	0	0	0	0	0	0	0
HERVE_5q14.3c	0	0	0	0	0	0	0	0	0	0	0	0	0	0	0	0	0	0	-0.171079	0	0	0	0	0	0	0	0	0	0	0	0	0	0	0	0	-0.162845	0	0	0	0	0	0	0	0	0	0	0	0	0
HERVE_8p12a	0	0	0	0	0	0	0	0	0	0	0	0	0	0	2.6402	0	0	0	0	0	0	0	0	0	0	1.12966	0	0	1.26987	0	0	0	0	0	0	0	0	1.42794	0	1.98848	0	0	0	0	0	0	0	0	0
HERVE_9q34.3	-7.07779	21.8073	-21.5063	-41.0572	-16.433	21.2482	-33.7553	-44.3639	24.3417	-8.75356	-33.4278	-18.5905	-54.222	23.0452	-21.2174	-37.4567	-79.0125	19.6858	-12.7465	9.66065	-8.91177	-55.1244	-62.5056	-48.5736	-54.6643	11.8858	-76.1062	-53.9709	-22.3181	-50.0549	-27.1977	-58.6637	-46.0772	-8.29032	-67.974	-8.1491	-37.4108	-66.1444	10.1098	15.8048	-28.4973	-53.2227	-55.8624	-28.9271	21.0931	25.8259	-89.4241	-84.3927	-74.6484
HERVEA_12p13.31	-3.90136	33.0281	0	-36.6275	-12.4773	19.5801	0	-45.6494	24.3582	-3.83871	-29.8456	-35.9938	-68.0187	26.2776	0	-37.9836	-85.7953	12.2473	-8.51095	12.7212	-10.9925	-58.9351	-75.7503	-65.3476	-48.7894	12.8469	-80.6858	-64.7357	-25.9506	-63.8626	-19.9391	-67.3091	-51.5659	-5.52817	-70.0261	-6.6146	-28.783	-80.7442	6.65905	17.062	-18.6664	-73.271	-59.4527	-36.1281	36.9092	29.0956	-105.835	-82.4193	-75.6592
HERVEA_12q21.1	0	5.6748	0	0	0	5.50463	0	-9.22103	8.00494	0	-13.6116	0	-13.5044	7.12123	-10.0412	0	0	1.9281	-0.628651	0	0	-10.5256	-10.1023	-16.166	-6.21006	2.24892	-10.2712	-5.57451	0	-11.3654	-5.98019	-14.1926	-6.34552	0	-14.6388	-3.9014	0	-16.9547	0	0	0	-13.1979	0	-12.9695	0	0	-10.1311	-11.9142	0
HERVEA_15q21.3	0	0	-12.6471	-21.7641	0	0	0	-19.8954	0	-2.54467	0	0	-32.5421	0	0	-16.4574	-38.5605	11.7017	-9.2286	5.34442	0	-19.148	-23.7854	-20.2273	-23.9453	8.36867	-23.5832	-19.6235	-10.1956	-18.0734	-15.1441	-27.6103	-17.0903	0	-32.8445	-5.29732	0	-30.6639	6.81547	11.4113	0	0	-17.7932	0	0	11.6022	-34.8741	-28.9238	-23.1381
HERVEA_19p12a	-3.61819	12.7843	-21.2256	-35.4943	0	12.5801	-29.1885	-41.1208	0	-4.75415	-30.6619	-16.4888	-50.2318	0	-19.5514	-30.5406	-80.409	12.2709	-8.60461	0	-11.286	-47.7255	-55.4495	-38.7631	-43.3159	8.38842	-66.1083	-45.5052	-17.7304	-37.3515	-25.148	-45.0615	-38.6971	-2.49729	-60.1366	-6.65202	-29.1494	-57.3714	6.54543	10.2073	-21.937	-41.5066	-53.7463	-28.7124	0	15.644	-74.369	-66.4317	-60.3733
HERVEA_19p13.2	-4.30701	21.462	-11.0858	-31.3581	-11.4198	11.2438	-21.158	-25.8992	20.6252	-4.03146	-19.8601	-19.7866	-42.7428	21.6932	0	-24.2251	-53.5144	9.38591	-9.66128	11.0574	0	-34.0818	-47.3826	-27.3038	-29.0274	6.48668	-42.3758	-41.5294	-16.7255	-36.6742	-13.2679	-41.9825	-26.8677	-5.99939	-41.8019	-7.06373	-16.772	-29.972	9.60343	10.9162	0	-39.8657	-35.3444	-22.6504	28.042	21.032	-57.276	-43.8162	-44.9546
HERVEA_19p13.3	-1.77685	0	-8.70741	-15.2944	-8.99134	-1.35114	-11.7731	-20.577	0	0	-13.8423	0	-22.8538	0	-16.0192	-14.9519	-26.633	0	0	0	0	-13.4174	-16.8703	-21.0179	-18.1276	0	-24.3088	-15.3615	-10.4546	-22.1123	-9.65995	-17.3702	-15.8621	0	-27.1722	0	-10.5334	-25.0763	0	0	0	-15.6302	-13.3295	-12.8145	0	0	-31.1347	-28.6169	-19.7573
HERVEA_19q13.33	0	8.68382	-15.8531	-35.8113	-11.1394	13.2629	-21.845	-38.119	0	-2.90217	-31.0546	-15.6993	-51.5358	0	0	-30.1207	-78.5509	14.205	-5.09025	9.28617	-7.69751	-45.8826	-48.5532	-39.0128	-41.1742	8.66136	-59.328	-40.47	-16.0536	-39.9567	-22.417	-43.0657	-36.8785	0	-62.9332	0	-20.6526	-46.6034	0	14.7311	-14.025	-40.8595	-44.2856	-27.6323	14.5262	16.9544	-72.2678	-65.7643	-57.768
HERVEA_3q25.32	-2.77165	0	-16.7669	-30.9648	0	0	-23.3364	-31.7316	0	0	-22.57	-15.5634	-36.8135	0	-23.1201	-21.7494	-49.1929	0	-7.60175	0	-8.9033	-31.6327	-40.8094	-27.5857	-32.8137	0	-47.6316	-34.2753	-18.1439	-32.9435	-23.1195	-35.8694	-27.6049	-2.24134	-45.6113	0	-21.7848	-40.0808	3.26099	0	-13.2477	-29.8151	-35.8733	-18.9408	0	13.597	-59.4338	-48.5701	-42.7821
HERVEA_4p15.1	0	0	0	-2.50403	0	0	0	0	0	0	0	0	0	0	-1.48853	0	-5.10081	0	0	0	-2.1162	0	0	0	0	0.135524	-6.42896	-2.47	0	0	0	0	0	0	0	0	0	0	0	0	0	0	0	0	0	0	-6.58485	0	-5.39271
HERVEA_5q14.3	-2.13543	0	0	-18.1042	-4.47373	0	0	0	0	-1.45137	0	-19.1759	-37.2411	0	0	-21.8947	-18.1331	0	0	0	0	0	-34.929	0	-12.2417	4.89555	0	-31.4441	-26.1307	-25.6578	0	-36.9503	0	-1.77315	-13.8136	0	0	-11.0315	0	0	0	-16.7362	0	0	0	0	-33.1874	-11.9419	0
HERVEA_5q22.2	0	0	-10.7489	-20.3034	-7.71679	0	-19.948	-31.6869	11.0382	0	-18.8723	-17.6597	-36.236	12.722	-22.4661	-16.9712	-36.6851	0	0	0	0	-20.134	-33.5738	-37.5777	-24.8889	0	-30.9042	-27.4917	-17.0794	-31.7162	0	-31.4212	-23.7706	0	-32.7668	0	-19.2173	-44.5886	3.60028	0	-16.7621	-36.0864	-20.268	-20.7966	14.033	6.29393	-47.1224	-40.0146	0
HERVEA_5q35.3	-1.57865	0	0	0	0	-1.44371	0	0	0	-0.643692	0	0	0	0	0	0	0	0	0	0	0	0	0	0	0	0	0	0	0	0	0	0	0	-1.34924	0	0	0	0	0	0	0	0	0	0	-3.08069	0	0	0	0
HERVEA_6q22.31	0	0	0	0	0	0	0	-15.3166	0	0	0	0	-16.1761	0	0	0	0	0	0	0	0	0	-19.1326	-22.2219	-13.3254	0	0	-14.6381	0	-14.4296	0	0	0	0	0	0	-13.5974	-28.8385	1.11825	0	0	-16.5581	0	0	4.45429	0	-24.9673	-19.3799	0
HERVEA_8q11.23b	0	0	0	0	0	0	0	-11.2782	0	0	-9.85999	-3.58769	-9.4661	0	-8.47319	0	-19.8595	0.789894	0	0	-9.1787	-16.702	-10.2996	-12.6849	-14.8237	0	-28.9444	-7.89518	0	-9.01608	-9.17483	-11.4947	-9.1972	0	-16.3255	0	0	-14.8261	0.163546	0	-9.0405	-6.36472	-16.4018	-7.52496	8.71831	8.31962	-23.3758	-15.1557	-24.9665
HERVEA_Yq11.21	0	0	0	-1.52587	0	0	0	0	0	0	0	0	-1.50309	0	0	-1.52167	-1.51986	0	0	0	0	0	-1.52015	0	0	0	0	-1.52018	0	0	0	0	0	0	0	0	0	0	0	0	0	0	0	0	0	0	-1.54809	0	0
HERVEA_Yq11.221d	0	0.0130461	0	-3.70135	0.0185906	0.0157597	0	-1.69492	0.000489025	-0.000200317	-3.70678	0	-4.51707	0.00823411	-2.40347	-3.71063	-4.20025	0.00534815	0	0	0.0170273	-3.84509	-3.66121	-4.07012	-2.26274	0	-2.28771	-3.509	0	-2.95153	-2.15696	-4.50259	-1.69799	0	-3.92447	0	-0.83725	-2.40796	0.00345837	-0.0199618	0	-2.20799	-1.57796	-2.77597	0	0	-5.63034	-3.11473	-1.46782
HERVFC1_11p15.4	-0.262608	0	0	0	-7.60524	0	0	0	0	-1.55145	0	0	0	0	0	0	0	0	-2.06243	0	0	0	0	-9.71441	0	0	0	0	0	0	0	-7.85648	0	0	0	-4.35564	0	-10.6452	0	0	0	-11.0238	0	0	0	0	0	0	0
HERVFC1_7q36.2	0	0	0	0	0	0	0	0	0	0	0	0	0	0	0	0	0	0	0	0	0	0	0	0	0	0	0	0	0	0	0	0	0	0	0	0.443581	0	0	0	0	0	0	0	0	0	0	0	0	0
HERVFC2_11p15.4	0	0	0	0	0	0	0	-5.47086	0	0	0	-2.97116	-8.14405	0	0	0	-8.68876	0	0	0	0	0	-10.2398	-7.2437	0	0	0	-7.84102	0	-7.17896	0	-6.55798	0	0	0	0	0	-5.86121	0	0	0	-11.1834	0	0	0	0	0	-6.99273	0
HERVFH19_13q34	0	0	0	-14.4223	0	0	0	-16.7569	4.32586	0	0	-12.3646	-20.81	9.68744	-13.0214	-16.2224	-34.0644	0	-4.85005	7.13586	0	-17.0751	-25.0806	-20.865	-14.2278	0	-22.6151	-22.2687	-9.55909	-18.5214	0	-20.3915	-18.7035	0	-23.3457	-3.02078	0	-23.6277	2.23418	0	0	-23.5534	0	-13.9541	22.9179	8.45099	-36.7164	-27.4928	0
HERVFH19_9q34.11	0	0	0	0	0	0	0	-6.45244	0	-2.88893	0	0	-8.02996	0	-5.7194	0	-13.7195	0	0	0	-2.54028	-5.47314	-5.7024	-6.40361	-7.51274	0	-15.7341	0	0	-4.75519	0	0	-6.79204	0	-13.8895	0	-5.29227	-9.34015	0	0	0	0	-12.2154	-8.26604	0	0	-15.9774	-13.5271	-16.6528
HERVFH21_14q32.31b	0	0	0	-12.7443	0	0	-16.1295	-12.8543	9.65184	0	0	-5.63439	-16.2309	8.12047	-10.3753	0	-24.6271	8.72055	0	6.10505	-8.46623	-16.5751	-15.1623	-12.9362	-16.7687	0	-27.2005	-13.0662	-6.48295	-14.6997	-11.6688	-17.682	-14.1492	0	-20.2416	0	0	-15.6145	0	0	-12.1781	-10.1254	-17.1924	-8.501	13.3139	13.2511	-26.8893	-16.5898	-25.3631
HERVFH21_19p12	-1.24021	0	-2.08581	0	-1.90645	0.221571	0	0	0.321587	-0.650436	0	0	-4.14083	0	0	-3.69624	0	1.52752	0	0	0.6102	0	-2.54538	0	-2.83272	0.552173	0	0	-2.6546	0	-2.39489	-4.54932	0	-1.05394	0	0	0	0	0	0	0	0	0	0	0	0	0	0	0
HERVFH21_1q23.1	-4.9453	19.5605	-23.8492	-62.7103	-10.222	15.0409	-32.1545	-48.3677	27.0591	-3.41833	-35.5443	-37.6937	-80.9578	26.1377	-25.3222	-54.9289	-107.832	24.8191	-11.4906	14.3843	-13.837	-64.0461	-91.4233	-51.0453	-52.2036	14.2568	-90.5096	-79.2482	-36.3174	-64.6838	-34.6671	-77.823	-53.1681	-4.00229	-71.6631	-9.01248	-37.8543	-66.1477	10.8207	11.8415	-35.8328	-73.7666	-70.5538	-34.7049	32.9998	32.3213	-117.278	-89.6766	-75.5499
HERVFH21_7q11.21	0	0	0	0	0	0	0	0	0	-2.64501	0	0	0	0	0	0	0	0	0	0	0	0	0	0	0	0	0	0	0	0	0	0	0	0	0	0	0	0	0	0	0	0	0	0	0	0	0	0	0
HERVFH21_8q11.21	-2.34913	6.22262	0	-18.2586	0	0	-12.4749	-11.5165	0	-2.06327	0	0	-13.6428	0	0	-11.5574	-20.791	0	0	0	0	0	-16.3084	-9.07106	-12.4644	5.37693	0	-17.5538	0	0	0	-16.0784	0	-2.10258	0	0	0	-17.3919	7.06969	0	0	0	0	0	0	0	-17.9023	-15.4871	0
HERVFH21_Xq11.2a	0	6.55999	-9.41455	-13.6807	-5.66156	7.24733	-15.4069	-28.817	11.5907	0	0	-11.6566	-23.2921	0	-17.5928	0	0	5.4786	-4.45871	0	9.78507	0	-18.8394	-32.8552	-21.1424	0	0	-15.154	-12.0274	-18.6233	0	-23.3371	-19.647	0	-27.0222	0	-20.285	-38.3484	0	0	-13.4352	-26.2133	0	-17.217	0	0	-29.8964	-38.4485	0
HERVFH21_Xq11.2b	-2.36465	6.92164	-11.062	-15.8887	-6.32922	6.26897	-15.2839	-27.6344	10.5095	0	-14.5538	-12.2272	-23.5289	0	-16.0855	-12.3677	0	0	0	0	10.3441	0	-21.5677	-31.9608	-20.8984	0	0	-16.5882	-11.4004	-21.6101	-14.0634	-25.3892	-15.1494	-2.56057	-25.5851	0	-21.173	-35.2964	0	0	-13.9902	-25.973	0	-14.6993	0	0	-33.6227	-38.788	0
HERVFRD_10p15.1a	-0.215761	0	0	0	0	0	0	0	0	0	0	0	0	0	0	0	0	0	0	0	0	0	0	0	0	0	0	0	0	0	0	0	0	0	0	0	0	0	0	0	0	0	0	0	0	0	0	0	0
HERVFRD_14q11.2	-4.83261	14.4146	-22.8927	-50.4395	-12.1244	0	-33.8866	-36.5322	17.9408	-7.09944	-21.8962	-17.4505	-55.0492	0	-19.7961	-44.249	-65.2882	16.6178	-15.4312	11.0104	0	-30.0118	-52.8471	-33.5356	-40.0115	7.72311	-47.6851	-45.5981	-28.055	-32.9625	-26.9021	-44.2026	-30.4542	-5.93292	-52.2186	-10.9714	-26.4885	-45.4928	8.84574	0	-29.7844	-36.6404	-41.6403	0	0	25.6442	-72.4627	-61.0239	-40.9954
HERVFRD_19q13.41	0	0	0	0	0	0	0	0	0	0	0	0	0	0	-6.57368	0	0	0	0	0	0	0	0	0	0	0	0	-4.63927	0	0	0	-2.58441	0	0	0	0	0	0	0	0	0	0	0	0	0	0	0	0	0
HERVFRD_1q44	0	0	0	-7.9638	0	0	-7.50404	0	0	0	0	0	0	0	0	0	0	0	0	0	0	0	0	0	0	0	0	0	0	0	-3.03833	0	0	0	0	0	0	0	0	0	-3.96988	0	0	0	0	0	0	0	0
HERVFRD_21q22.3	-5.2835	22.5285	-18.1653	-40.9548	-15.0771	15.4108	-33.7965	-41.1015	26.8933	-3.02275	-32.2586	-22.337	-52.8689	26.598	-22.6279	-29.582	-74.1333	18.192	-10.6222	11.3076	0	-54.0635	-61.4492	-53.8572	-43.728	10.1732	-68.7744	-51.4982	-20.2505	-54.5445	-21.8562	-57.0643	-48.726	-5.67441	-64.8403	-7.61146	-38.9547	-61.4007	8.49237	11.815	-19.9118	-58.6909	-49.9916	-34.8558	20.9075	26.3576	-83.4881	-76.3236	-62.2547
HERVFRD_2p11.2	-1.28423	3.66525	-7.32615	0	0	0	0	-8.76215	0	0	-11.933	0	-14.4841	0	-8.42787	-10.901	-18.3803	4.53785	0	0	0	0	-14.0657	-11.4186	-7.58219	0	-7.86787	-7.47172	0	-7.31926	-8.07331	-12.3716	-6.3329	0	-9.48581	0	0	-12.876	0	0	0	-7.87698	-8.62241	-8.08267	0	0	-18.3289	-10.1096	0
HERVFRD_3p21.31	0	0	0	0	-3.92172	0	0	-12.3524	0	0	-9.74272	0	-10.4874	0	-9.18231	0	0	0	0	0	0	-10.8932	0	-15.3996	-11.8179	0	-18.343	0	0	-12.0144	0	0	-8.63468	0	-20.4311	0	0	-14.4805	0	0	0	-10.7238	-8.95253	-10.3451	0	0	-20.3543	-17.7647	-19.1821
HERVFRD_4q32.3	0	5.88694	0	0	0	4.37185	0	0	8.61447	0	0	0	0	8.33576	0	0	0	2.26445	0	0	0	0	0	0	0	1.26981	0	0	5.4395	0	0	0	0	0	0	0	0	-8.7144	0	0	0	0	0	0	0	0	0	0	0
HERVFRD_6p24.2	-5.60121	29.3787	-27.112	-64.7773	-12.9599	25.4876	-37.0787	-68.7227	40.8072	-6.15433	-51.5895	-46.226	-102.836	39.7903	-32.0813	-63.3366	-151.916	31.4779	-10.9225	11.0012	-22.1137	-90.5066	-114.853	-81.1389	-74.9636	13.963	-136.32	-95.9998	-39.087	-86.4183	-34.8388	-90.6925	-70.7416	-6.6768	-99.5226	-6.3647	-42.5132	-103.117	10.9395	12.8179	-43.2378	-94.8473	-97.3556	-53.3554	31.8594	31.0467	-162.01	-117.722	-118.433
HERVFRD_6q22.31	-1.86606	5.38235	0	-15.2021	0	10.2146	0	-11.0051	10.9996	0	0	0	-11.3209	13.0313	0	0	-20.3791	7.04078	-2.57478	7.68311	0	-10.0611	-12.0746	-13.1207	-13.2233	6.30592	-15.17	-9.93391	0	-10.673	-6.25344	-13.8714	-10.0085	0	-21.7397	0	0	-13.4269	0	9.06554	0	0	-13.7453	-7.48848	18.5343	14.7518	-19.7011	-15.3642	-18.0836
HERVFRD_7p13	0	0	0	0	0	0	0	0	3.50136	0	0	0	0	2.53064	0	0	0	2.32809	0	0	0	0	0	0	0	0	0	0	0	0	0	0	0	0	0	0	0	0	0	0	0	0	0	0	0	0	0	0	0
HERVFRD_7q21.3	-2.43012	11.6572	0	-23.1128	0	12.7101	-25.6287	-17.1842	17.8722	-2.13136	0	-8.61281	-30.2461	19.7056	0	0	-44.7401	16.0898	-5.52533	4.97228	-7.56286	-26.9137	-23.0164	-25.7245	-20.4921	6.19912	-47.7636	-18.3664	0	-20.2446	0	-23.1366	-24.3068	-2.41823	-36.989	-5.73476	0	-24.1985	0	10.8078	0	-23.3438	-31.6745	-14.5196	0	10.9311	-49.8297	-34.0982	-47.0111
HERVFRD_Xq21.33b	-3.71482	0	0	-38.1085	0	0	0	-24.2133	0	-2.01955	0	-30.5643	-54.1574	14.4545	0	-38.3944	-68.1653	21.262	-9.83267	0	0	-33.6303	-62.7895	-34.9277	-27.4354	15.4726	-42.8222	-55.5573	-22.3673	-39.0757	0	-50.7891	-25.4131	0	-37.8101	0	0	-46.8145	0	19.915	-16.9533	-58.1582	-33.5585	0	0	12.3572	-73.0519	-53.5228	-39.6766
HERVH_10p11.21	-1.15477	0	-4.25477	-5.90195	0	0	-4.89862	-6.46506	0	0	-8.76174	-2.50862	-7.8301	0	-6.66319	-5.5858	-8.45655	2.32264	0	0	-2.93168	-4.39647	-5.82674	-5.83357	-8.94355	0	-8.63804	-5.10662	-4.71452	-7.17501	-7.75117	-8.17236	-3.18146	-0.971415	-8.60681	0	0	-7.88294	0	0	-5.96838	-5.3579	-5.02019	0	6.22482	5.17681	-10.7778	-7.78702	-6.36791
HERVH_10p12.31	0	3.74417	0	0	0	3.26766	0	-14.0369	4.86969	0	0	0	-13.7826	0	0	0	-21.4795	5.28481	-8.35859	0	0	-17.5722	-15.7056	-20.1435	-14.1387	3.84938	-23.4929	-15.2026	0	-15.8167	0	-14.3492	-13.9257	0	-18.4664	-4.8192	0	-20.1287	0	0	0	-16.0015	0	0	0	9.6071	-24.0293	-22.948	-21.961
HERVH_10p14a	0	-4.6495	0	-11.4629	-3.49917	-2.22885	0	0	-3.64121	0	0	0	-15.5497	-2.78213	0	-9.74749	-26.7516	-3.017	-7.23073	1.46805	-10.2505	-17.3831	-14.9734	-11.8875	0	-2.14313	-31.2513	-14.0871	0	-14.0982	0	0	-14.5541	0	-18.6439	-3.93469	0	-15.0544	0	0	0	0	-21.1851	0	0	2.9415	-27.682	-17.1281	-26.0495
HERVH_10p15.1	0	0	0	0	0	0	0	0	0	0	0	0	0	0	0	0	0	0	0	0	0	0	0	-15.6809	0	0	0	-8.57461	0	0	0	-7.62075	0	0	0	0	0	-19.7248	0	0	0	-12.4878	0	0	0	0	0	0	0
HERVH_10q22.3b	-4.96118	14.2925	-17.0745	-52.7107	-10.6563	0	-26.9055	-42.4391	24.7595	-3.30925	-32.0395	-20.7135	-63.5115	24.7317	-20.3047	-44.971	-83.962	22.9973	-13.6899	12.0759	0	-43.7903	-65.5914	-42.1591	-44.7073	10.5009	-68.2413	-58.867	-26.8966	-46.7228	-25.9638	-54.6999	-42.2758	0	-67.9659	-11.3204	-25.5226	-54.0418	11.1364	13.4729	-23.8142	-48.1933	-49.4825	-28.3342	26.1773	27.6596	-90.7656	-72.265	-59.2125
HERVH_10q24.2a	0	7.62465	0	-19.0974	0	9.10745	-17.7257	-17.9808	15.8263	0	-15.4109	-9.5564	-27.6683	17.879	0	-12.6895	-38.2545	16.1842	-4.56774	9.90631	0	-24.0566	-25.0388	-23.8173	-21.293	8.22635	-34.3892	-23.2254	-9.17776	-26.358	0	-31.9188	-26.2502	-2.0076	-34.3371	-4.49691	-17.6007	-22.8432	0	15.2215	0	-25.7307	-22.2013	-14.1495	0	18.0968	-38.3529	-35.4389	-33.2544
HERVH_11p15.4a	-3.4113	0	0	-23.596	0	0	0	-16.1833	0	-2.10328	0	0	-17.5735	0	0	-16.9598	0	5.64598	0	10.0843	0	0	-17.5316	0	-20.465	8.6062	0	-19.1652	-14.3908	0	0	-21.445	0	0	-23.1378	0	0	-21.8581	5.14386	10.5295	0	0	0	0	0	19.3132	-22.6417	-24.6808	0
HERVH_11p15.4b	-4.81752	10.4592	-19.5814	-26.9925	-7.79598	0	-35.2316	-31.1217	10.5017	-6.30028	-25.4566	-14.092	-37.5398	13.1761	-17.3696	-24.0093	-50.9242	7.36203	0	13.2535	-9.05861	-37.7498	-39.151	-31.5911	-40.8026	4.62707	-59.0927	-25.706	-18.4453	-32.1698	-26.6028	-42.0383	-34.143	-6.96254	-42.3853	0	-28.7053	-38.8388	7.53813	0	-27.5082	-33.1337	-42.549	-18.7266	25.5393	18.4244	-57.4917	-53.6936	-51.9601
HERVH_11p15.4h	0	0	0	0	0	0	0	0	-0.992388	0	0	0	0	0	0	0	0	0	0	0	-2.86686	0	0	0	0	0	0	0	0	0	0	0	0	-0.0067996	0	0	0	0	0	0	0	0	-3.86032	0	0	0	0	0	0
HERVH_11q13.2b	-4.00072	14.5025	0	-43.4475	-12.4467	11.9728	-23.9429	-37.0476	18.7216	-3.36465	-23.3145	-30.1559	-66.1181	14.4572	0	-37.7862	-78.9219	23.4381	-12.5811	0	0	-41.5098	-69.9617	-46.9896	-36.0342	13.2171	-57.1148	-59.3081	-27.4196	-44.7992	-19.7928	-62.2777	-35.8399	0	-51.0985	-6.62088	-28.4672	-60.1354	9.04149	13.3135	-23.243	-62.2175	-40.5108	-25.6866	25.2872	23.0107	-84.733	-62.6633	-41.001
HERVH_11q13.2c	-5.10661	15.1164	-13.6053	-32.2184	0	0	-14.3146	-24.097	9.38716	-2.32097	-17.5975	-10.5586	-31.7255	0	0	-23.8705	-42.1975	7.81992	-5.23252	7.52071	0	-22.9153	-35.9395	-20.2313	-30.0001	9.49609	-26.0945	-30.3165	-18.0892	-28.2004	-16.1092	-31.7851	-17.6945	0	-36.0954	0	-15.4617	-30.0592	9.21322	12.1395	-14.8814	-21.093	-20.6597	-11.3097	18.027	17.3265	-44.4694	-40.8746	-28.2729
HERVH_11q13.4b	-1.18009	0	0	-4.25528	0	0	0	-5.90691	0	-0.845737	0	0	0	0	-5.04512	0	0	0	-0.293615	0	0	0	-6.17746	0	-6.54518	0	0	0	0	-5.03724	-5.04302	-6.25654	0	-0.683638	0	0	0	-6.56721	0	0	0	0	0	0	0	0	0	0	0
HERVH_11q14.3	0	0	0	0	0	0	0	6.53381	0	0	8.86878	0	0	0	0	0	22.1312	0	0	0	16.9859	21.0097	0	6.25612	10.8954	0	35.7206	0	-4.37265	0	0	0	11.6284	0	12.6242	0	0	0	0	0	0	0	21.3389	7.86604	0	0	15.8702	0	36.3754
HERVH_11q21d	0	-1.32709	0	0	0	-2.35567	0	0	-2.05453	0	0	0	0	0	0	-0.0848342	-0.0897824	-0.114553	1.0106	0	0	0	0	0	0	-0.0317612	0	0	0	0	0	0	0	0	0	0.836482	0	0	0	0	0	0	0	0	0	0	0	0	0
HERVH_11q22.2	0	0	0	0	0	0	0	0	0	0	0	0	-6.4523	0	0	-4.28636	-8.8225	0	0	0	0	0	-8.05897	0	0	0	0	-5.11951	0	0	-3.51263	0	0	0	0	0	0	0	0	0	0	0	0	0	0	0	-7.11757	0	0
HERVH_11q23.3b	-6.58825	12.9607	-19.05	-35.2288	-13.8829	19.1252	-28.2524	-29.8128	19.2083	-3.73809	-20.5871	-13.0615	-47.3494	0	0	-23.8452	-37.6296	13.1294	0	9.10044	0	0	-38.8394	-30.3155	-27.319	8.38623	0	-34.968	-22.2646	-31.3715	-20.807	-43.9243	-21.2301	-4.13127	-47.6977	-6.51665	-27.8971	-37.728	7.29669	0	0	-30.8352	-24.5997	0	20.0295	21.1718	-48.1473	-51.4441	0
HERVH_11q23.3c	-5.34678	10.396	0	-23.5467	-12.7788	13.8274	-19.7587	-19.3828	18.9727	-3.62642	0	0	-34.7356	0	0	-15.0071	0	17.0211	0	9.67503	10.8271	0	-25.9622	-21.9279	-16.2879	9.27131	0	-25.1949	-10.3226	-22.562	-15.1033	-33.5194	0	0	-34.459	0	-19.7519	-26.2624	7.04287	10.4994	0	0	0	0	18.7314	21.1847	-30.428	-37.6145	0
HERVH_11q24.1c	0	0	0	-6.73354	0	0	-7.73999	-11.0373	0	0	-11.8562	-3.26724	-13.2519	0	0	-7.69632	-21.8341	0	0	0	0	-20.6956	-14.2735	-15.0994	-11.5997	1.75451	-23.3653	0	0	-10.3943	-8.31064	-13.7651	-18.5125	0	-17.024	0	-12.0275	-15.5911	0	7.86611	-6.84193	-17.0368	-14.178	-11.7674	8.66503	0	-17.8868	-20.5453	-19.933
HERVH_11q25a	0	0	0	0	0	0	0	0	-3.53246	0	0	0	0	-2.84268	0	0	0	0	0	0	0	0	0	0	0	0	0	0	0	0	0	0	0	0	0	0	0	0	0	0	0	0	0	0	0	0	0	0	0
HERVH_12p11.22a	0	0	-11.1949	-20.7172	0	4.99788	-16.2178	-25.8631	0	0	-17.8755	-14.3999	-33.3396	0	-19.3302	-16.1	-54.916	0	-6.42084	7.33843	-10.1187	-30.3849	-38.1561	-31.4178	-24.2106	0	-49.622	-31.0793	-12.109	-31.6931	-13.6116	-27.6587	-31.1511	0	-36.7243	-5.11473	-19.3705	-35.9166	0	0	0	-32.8868	-36.9127	-22.1654	0	7.62168	-58.5709	-41.5029	-46.075
HERVH_12p12.1b	0	0	0	-11.3435	0	0	-12.6234	-7.2606	7.89928	-2.01291	0	-4.22199	-10.0509	0	0	0	-17.8945	6.3342	0	0	0	-15.3443	-11.9429	-11.0756	-8.67389	0	-19.7144	-10.0168	0	0	0	-11.484	-11.486	0	0	0	0	-10.1823	0	0	-6.21469	-11.2552	-15.5147	-8.11414	0	0	-17.9634	-11.0686	-20.0068
HERVH_12p12.2a	0	0	0	0	0	0.0389786	0	-0.661129	0	0	-2.27927	0	-1.32465	0	0	0	0	0.0201454	0	0	0.0203816	-1.30602	-0.60108	-2.2345	0	0.0914221	0	0	0	-2.74377	0	-1.78381	0	0	-2.76094	0	-0.537262	0	0.00344949	0	0	-0.620963	0	-2.45403	0	0	0	-1.88935	0
HERVH_12p12.2b	0	0	0	0	0	0	0	0	0	0	0	-1.29019	0	0	0	0	0	0	0	0	0	0	0	0	0	0	0	0	0	-3.37466	0	0	0	0	0	0	0	0	0	0	0	0	0	0	0	0	0	0	0
HERVH_12p12.3b	0	0	0	0.757888	0	0	0	0.772185	0	0	1.73357	0.470968	0	0	0	0	2.36806	0	-0.0035028	0	-0.00261111	2.23354	2.18664	1.02908	0	-0.00793548	1.83715	1.88241	0	1.75917	0.612297	1.28833	0	0	2.19288	-0.00453846	0	1.30866	-0.00375338	0	0	1.48772	0	1.8312	0	0	2.99438	2.34502	1.84015
HERVH_12p13.2a	0	0	0	0	0	0	0	0	0	-1.71374	0	-6.43741	-18.2136	0	0	-14.574	0	0	-6.46485	0	0	0	-15.2999	0	0	0	0	-14.5761	-11.9098	0	0	-16.6775	0	0	0	-3.82177	0	-13.424	0	0	0	0	0	0	0	0	-18.0527	-17.3179	0
HERVH_12p13.31d	0	-2.62279	-16.4113	-30.8784	0	0	0	-27.1388	0	0	-19.5029	-17.0342	-39.2159	0	-19.4218	-27.3399	-57.2472	0	-8.24689	4.63365	-11.2675	-34.6515	-43.0566	-24.6662	-26.6071	0	-48.759	-36.5616	-18.6137	-33.0048	-20.0977	-27.8399	-29.1236	0	-46.2054	-4.0862	0	-33.299	0	0	0	-31.1047	-33.9099	-18.8627	17.5809	8.77965	-60.4667	-42.1361	-40.8384
HERVH_12p13.32	-4.4079	10.08	0	-48.4672	0	0	-22.0924	-28.219	0	-2.6032	-22.0775	-24.3266	-58.3066	0	0	-42.1304	-80.2882	19.7928	-13.0992	0	-13.0973	-34.836	-60.0931	-27.6379	-32.2428	10.2866	-66.1622	-55.8872	-26.8097	-39.9977	-17.874	-52.1652	-33.081	0	-50.7866	-8.76218	-19.5827	-40.5846	8.28474	0	-19.7269	-40.9135	-47.4092	0	0	20.223	-89.2759	-52.6828	-56.8774
HERVH_12q13.2b	-5.71646	39.4049	0	-46.336	-14.8615	17.7211	-29.6746	-52.1579	41.0109	-3.07913	-34.6502	-40.8595	-81.6273	39.6637	0	-49.2418	-105.387	25.7457	-11.6637	14.0111	-10.3858	-67.8148	-87.705	-70.8644	-59.2965	16.7661	-96.4313	-77.709	-29.6857	-69.0162	-21.0061	-78.8912	-57.2757	-4.91128	-71.3197	-7.14745	-31.7881	-90.7638	12.3092	19.8458	-24.6592	-81.141	-61.6355	-36.5672	29.7838	29.2056	-124.04	-91.0971	-88.958
HERVH_12q21.2a	0	13.8433	-16.8728	-43.9549	0	18.3517	-21.0535	-35.6815	0	-3.7005	-23.1684	-33.8031	-56.8382	0	0	-42.3113	-56.3746	0	-9.74438	0	14.5989	0	-61.9311	-42.2569	-26.1457	5.9995	0	-57.9229	-29.9558	-44.2837	-13.7832	-44.2892	-27.6861	0	-42.7486	-7.65407	-27.6003	-55.8291	6.70297	0	-19.881	-65.7481	0	-23.9141	20.5164	16.5712	-57.1334	-56.1526	0
HERVH_12q21.2b	-3.40575	0	0	-30.8733	0	0	0	-20.8394	0	-2.26294	0	-16.5096	-44.523	0	0	-26.7094	-45.1423	17.4345	-10.8416	0	0	0	-45.9163	-27.399	-21.5884	13.1787	-42.8717	-41.5795	-21.045	-27.1702	0	-36.8693	-22.0429	0	-35.0881	0	0	-37.7269	0	16.1488	-15.1324	-35.6654	0	0	23.174	19.9058	-57.6275	-36.6809	-32.6419
HERVH_12q21.32c	0	0	0	0	0	0	0	0	0	0	0	0	0	0	0	0	0	0	0	0	0	0	0	0	0	0	0	0	0	0	0	0	0	0	0	0.966288	0	0	0	0	0	0	0	0	0	0	0	0	0
HERVH_12q22	-2.56398	0	0	0	0	8.77222	0	0	15.0133	0	0	0	0	11.9932	0	0	-10.2994	10.7986	0.482128	2.63553	-2.94709	0	0	0	0	0	0	0	0	0	0	0	0	0	-11.9224	0.713077	0	0	2.41633	0	0	0	-9.07424	0	14.5528	9.50194	0	0	0
HERVH_13q13.3a	-4.58769	10.6401	-26.7201	-59.4452	-14.492	13.5613	-46.633	-63.5756	21.6763	-4.078	-49.4445	-29.0445	-85.8672	25.6097	-34.3653	-55.1684	-131.756	20.6623	-10.8568	13.5246	-19.3175	-78.9601	-86.8508	-65.5406	-72.157	10.7934	-116.489	-71.2462	-30.4461	-64.6245	-40.5294	-71.5088	-65.1787	-3.7983	-96.541	-8.25562	-44.8105	-77.9519	7.95056	13.8291	-33.5404	-70.0631	-80.0745	-45.2019	28.7884	28.6631	-134.58	-105.395	-107.586
HERVH_13q13.3b	-4.50576	9.02994	-14.9236	-35.3044	-7.39055	0	-20.3153	-33.3985	23.6348	-2.98984	-23.2796	-9.79457	-49.407	22.2919	0	-32.0551	-64.4962	20.2453	-4.69196	11.3296	0	-34.2595	-45.7399	-27.6852	-36.7177	10.7705	-49.5707	-40.6083	-19.4081	-36.292	-21.2943	-39.944	-28.3556	0	-53.576	0	-16.0541	-41.3412	7.31538	13.9471	-13.4661	-30.7296	-32.435	-19.0439	26.1481	23.1702	-61.8241	-58.2798	-47.2436
HERVH_13q14.11b	-1.29079	0	0	0	0	4.08868	0	0	4.43224	0	0	0	0	0	0	0	0	3.33437	0	0	0	0	0	0	0	0	0	0	0	0	0	0	0	-1.33337	0	0	0	0	0	0	0	0	0	0	0	0	0	0	0
HERVH_13q14.2a	-4.51893	11.8129	-23.7929	-51.0514	0	15.8606	-34.8567	-52.6841	30.2424	-2.56589	-36.0141	-19.9021	-71.5019	33.3721	-26.5392	-50.3366	-104.727	23.6486	-9.64189	12.9533	-11.0245	-61.6242	-73.0249	-50.7869	-60.5238	11.2433	-89.0944	-59.493	-23.5417	-52.8408	-32.2885	-54.5636	-51.9429	-3.28271	-80.9058	-6.08904	-35.0356	-65.568	7.52651	15.7641	-31.7858	-55.3413	-58.6011	-34.1377	38.463	28.8673	-104.368	-90.3076	-79.4593
HERVH_13q21.32b	0	0	0	0	-9.35578	0	0	0	0	-2.31003	0	0	-17.9295	0	0	0	0	0	-6.2494	0	0	0	0	0	-11.1085	5.14919	0	0	0	0	0	-14.1059	0	0	0	0	0	-10.073	0	0	0	0	0	0	0	8.34351	0	0	0
HERVH_13q31.1a	0	10.1895	-22.0532	-45.4927	0	7.55901	-24.8628	-33.1423	21.5644	0	-25.1181	-24.07	-55.6932	16.9081	-18.4671	-38.0455	-65.8678	16.6605	-8.6405	0	0	-34.4157	-64.3409	-31.8824	-28.3778	4.78919	-42.0243	-48.3939	-27.544	-37.5949	-27.9866	-47.2185	-30.7655	0	-40.6527	-3.64544	-34.5305	-45.5359	0	0	-22.5268	-50.0728	-43.676	-24.316	18.7668	19.1139	-68.1258	-54.0916	-30.1204
HERVH_13q33.3	0	0	0	-8.52778	0	0	-8.12596	-13.4382	6.33976	0	0	-10.4496	-13.4093	7.93286	0	-10.1116	-24.7352	3.52367	0	0	0	-17.0772	-19.5853	-20.779	-13.0248	0	-27.9589	-13.9002	0	-11.0898	0	-13.7785	-13.6107	0	-21.9838	0	-9.14343	-22.6666	0	0	-10.2911	-24.2391	-21.3655	-9.70779	0	6.94732	-28.3515	-28.6154	-19.4616
HERVH_14q11.2a	0	11.0673	-11.621	-33.801	0	0	0	-22.5572	13.1466	-1.70906	-14.9697	-17.4475	-44.7428	16.1566	0	-34.783	-44.4086	11.3039	-18.3213	6.55813	0	-21.8344	-49.9468	-19.9412	-27.1864	10.1381	-21.9669	-44.6943	-24.8496	-33.8512	-15.2958	-38.7818	-15.5334	0	-31.1259	-11.57	0	-33.8205	10.0563	0	-15.2775	-25.0887	0	0	17.0293	17.0795	-52.8516	-34.3428	-18.2256
HERVH_14q12c	-3.7798	0	0	-23.4863	0	0	0	-13.4132	0	-2.72251	0	0	-22.2608	0	0	-19.7376	0	0	-3.94999	0	13.2412	0	-15.7844	0	0	1.98734	0	-18.974	-12.9372	0	0	0	0	0	0	-5.06256	0	-18.4726	0	0	0	0	0	0	0	12.0704	0	0	0
HERVH_14q22.1a	-0.219439	0.00763585	0	0	-2.30416	0	0	0	0.197551	-1.05819	0	0	0	0.351122	0	0	0	0.0334071	-0.192611	0	0	0	0	-1.01665	0	-0.439738	0	0	0	0	0	0	0	-1.91741	0	-0.112866	0	0	0	0.125961	0	0	0	0	0	0	0	0	0
HERVH_14q24.2c	0	0	0	0	0	0	0	0	0	0	0	0	0	-1.29429	0	0	0	1.57729	0	0	0	0	0	0	0	0	0	0	0	0	0	0	0	0	0	0	0	0	0	0	0	0	0	0	0	0	0	0	0
HERVH_14q24.3b	0	0	0	-4.72266	0	0	-7.29614	0	0	0	0	0	0	0	0	0	0	1.84183	0	1.04756	0	0	0	0	0	0	0	0	0	0	0	0	0	0	0	0	0	0	0	0	-3.26071	0	0	0	4.90495	3.179	0	0	0
HERVH_14q32.31b	-3.52575	4.624	-14.9593	-27.2172	0	0	-33.4288	-31.7865	11.2911	0	-29.0002	-10.6568	-38.2398	11.0855	-19.8656	-19.268	-58.1476	10.8219	0	5.56672	-13.2698	-40.4839	-33.2539	-35.14	-38.8683	0	-60.1112	-24.7475	-11.336	-29.9932	-23.7254	-34.3724	-35.9327	-3.38278	-47.6794	0	-20.5372	-36.5984	0	9.03066	-23.7735	-32.3677	-37.9886	-25.0142	18.4728	16.8659	-59.6434	-50.5969	-58.8535
HERVH_15q25.3a	0	0	-13.2064	-25.8264	0	0	0	0	0	-1.15992	0	-17.8828	-20.9922	0	0	-25.3801	-29.2504	0	-5.12171	3.3218	0	0	-38.7022	0	0	0	0	-34.2722	-21.3358	-21.2464	-14.6618	-22.1326	0	0	0	-2.60493	0	-21.6277	0	6.95969	0	-25.5763	0	0	0	6.85921	-30.6738	-21.6997	0
HERVH_16p12.3	0	1.83104	0	0	0	0	0	0	0	0	0	0	0	0	0	0	0	0	0	0	0	0	0	0	0	0	-8.19631	0	0	0	0	0	-5.945	0	0	0	0	0	0	0	0	0	0	0	12.16	5.83102	0	0	0
HERVH_16q22.1	0	0	-14.7261	-31.8714	0	0	0	-25.6596	0	-1.59228	-19.2799	-22.3699	-38.8326	0	0	-31.5531	-50.4152	11.934	-6.73195	0	-8.10014	-32.3026	-48.6237	-23.017	-22.4901	0	-40.7497	-36.842	-24.3781	-31.9579	-21.854	-35.561	-23.5362	0	-37.7532	-3.82791	0	-34.5634	0	0	-14.5453	-36.5237	-35.5157	-18.8737	0	13.5204	-54.8853	-39.665	-32.0964
HERVH_17p11.2	-5.48016	16.8741	0	-47.6139	-11.2527	0	0	-39.1057	21.2051	-3.17652	0	-31.2505	-63.5959	19.7758	0	-39.3543	-77.4201	22.4124	-10.8042	0	0	-40.7993	-73.9354	-51.1697	-30.2011	13.0353	-48.9792	-63.9264	-26.2487	-45.4947	-22.2386	-61.623	-39.1487	-3.76823	-42.5103	-8.74435	-27.3805	-68.7144	9.98181	16.8214	-20.9324	-68.8815	-43.5871	-27.0354	20.4353	23.4147	-80.1654	-64.608	-35.0432
HERVH_17p12	-4.78918	15.0532	0	-55.3713	-8.93401	9.89173	-23.9256	-37.4364	17.5545	-4.39832	-28.3112	-36.0895	-66.5538	23.1537	-17.3106	-52.485	-97.0206	16.7887	-11.4713	0	-9.79372	-55.8293	-79.1977	-43.9593	-42.3605	13.1033	-70.8279	-72.1403	-32.0256	-54.8651	-21.8371	-64.4458	-48.799	-6.52584	-62.0428	-8.49318	-27.2079	-55.6325	10.2664	18.2572	-22.4719	-67.3682	-57.0752	-30.3245	28.9054	27.9933	-100.187	-72.2521	-65.3802
HERVH_17q12	0	0	0	-7.53695	0	0	-6.19964	-7.1072	0	0	-6.44882	0	0	0	0	0	0	0	0	0	0	0	-8.32248	-4.36838	0	0	0	-8.45407	-4.71065	0	0	-6.63679	0	0	0	-2.6665	0	-7.29489	0	0	0	-7.91046	0	-4.59704	3.82882	0	0	-11.0114	0
HERVH_17q22b	-0.18418	0	0	0	0	3.49945	0	0	0	0	0	-3.61311	0	0	0	0	0	0	0	0	0	0	0	0	0	1.20654	0	0	0	0	0	0	0	0	0	0	0	0	0	0	-2.79715	0	0	0	0	0	0	0	0
HERVH_18q12.2a	0	0	0	0	0	0	0	0	0	-1.68267	0	0	0	0	0	0	0	0	-2.21944	0	0	0	0	0	0	0	0	0	0	0	0	0	0	0	0	-2.84396	0	0	0	0	0	0	0	0	0	0	0	0	0
HERVH_18q12.2c	0	0	0	-3.47899	0	0	0	-1.89291	0	-0.456755	0	-3.63737	0	0	0	0	-4.91473	0	0	0	0	-1.58191	-3.60685	0	0	0	0	-3.62079	0	-4.87801	-1.39508	0	0	0	-3.54056	0	0	-1.80838	0	0	-5.38989	0	0	0	0	0	-5.9333	-6.42203	0
HERVH_18q21.32	-3.86067	0	0	0	-10.6006	0	0	0	0	-2.87305	0	-11.8616	-20.6408	0	0	-16.6438	-23.3933	0	-6.69522	0	0	0	-22.9462	0	-11.8827	0	0	-19.0647	-12.5626	-16.1064	0	-28.5201	0	0	-17.2206	-2.89199	0	-12.9907	0	9.76977	0	-17.3965	0	0	0	9.76447	-25.6788	-20.5347	0
HERVH_18q22.3b	0	0	0	0	0	0	0	0	0	0	0	0	0	0	0	0	0	0	-2.54619	2.14329	0	0	0	0	0	0	0	0	0	0	0	0	0	0	0	0	0	0	0	9.64906	0	0	0	0	0	0	0	0	0
HERVH_19p12b	-1.33107	0	-6.44965	-6.65871	-3.84564	0	0	-9.06873	0	-1.86861	-11.0666	0	-17.1308	0	0	-11.226	-23.5899	0	0	0	-5.99615	-9.56369	-11.0982	-7.64669	-16.157	0	-22.5597	-10.0776	-5.2249	-14.9057	-8.31669	-12.0831	-9.95559	0	-20.5155	0	-7.46617	-8.28701	0	4.39301	0	0	-10.3137	0	0	0	-25.1145	-18.1096	-22.2416
HERVH_19p13.12	0	0	0	0	0	0	0	-10.7361	0	0	0	0	-11.8578	0	-6.88171	0	0	0	0	0	0	0	0	-12.5923	-7.80644	0	-14.8694	0	0	0	-5.41155	0	0	0	-13.9214	0	0	-14.7056	0	0	0	-9.93412	0	0	2.30804	0	0	-13.514	0
HERVH_19p13.2d	-7.06162	26.8847	-27.7533	-70.5963	-17.239	21.0368	-42.7103	-65.1032	39.6873	-6.87787	-48.9742	-39.3045	-99.7171	46.892	-32.4083	-67.7295	-139.59	27.9299	-11.2087	16.1606	-12.6423	-75.9038	-104.78	-72.1891	-74.6037	14.2491	-114.39	-92.788	-43.7937	-81.158	-34.8272	-92.1787	-67.8199	-8.79071	-93.9521	0	-41.6631	-85.9387	14.4593	18.675	-39.991	-85.845	-75.7959	-46.4209	38.2171	33.2365	-154.138	-114.678	-101.223
HERVH_19p13.3a	-0.950501	0	0	0	0	0	0	0	0	-0.367463	0	0	0	-0.942152	0	0	0	0	0	0	0	0	0	0	0	0	0	0	0	0	0	0	0	0	0	0	0	0	0	0	0	0	0	0	0	0	0	0	0
HERVH_19p13.3b	-2.96731	8.62955	0	0	-8.61241	0	0	0	10.6473	-2.64578	0	0	-16.0008	14.2573	0	0	0	11.7576	0	7.91517	0	0	0	-13.436	0	8.50797	-17.0795	0	0	0	0	-18.5758	0	0	0	0	0	0	5.1644	15.9531	0	0	0	0	15.0045	11.6254	-22.6059	0	-18.9654
HERVH_19p13.3c	-0.417812	0	0	0	0	6.11767	0	0	0	0	0	0	0	0	0	0	0	0	0	0	0	0	0	0	0	0	0	0	0	0	0	0	0	0	0	0.436305	0	0	0	0	0	0	0	0	0	0	0	0	0
HERVH_19q13.2a	-4.54721	11.5924	0	-29.2067	-11.4073	0	-23.6977	-27.0007	13.6702	-2.76872	-22.4193	-16.4602	-41.6308	0	0	-21.2009	-64.6996	18.8315	0	0	-8.90506	-40.5722	-47.4177	-30.04	-30.3201	11.2826	-56.8203	-40.2563	-17.0368	-36.8032	-17.1745	-46.4749	-35.7272	0	-47.5274	0	-25.2201	-37.4956	8.05268	14.5641	0	-38.09	-40.4186	-20.6746	25.8815	23.047	-63.179	-51.5822	-51.5257
HERVH_19q13.32a	0	0	0	0	0	0	0	0	0	-1.58322	8.11399	0	0	0	0	0	18.058	0	0	0	14.828	19.473	0	0	9.93853	0.771208	33.6674	0	0	0	0	0	8.31165	0	12.4919	0	0	0	0	0	0	0	17.8776	0	0	0	17.0311	0	33.5006
HERVH_19q13.32b	0	0	0	0	0	0	0	0	0	-2.24618	0	0	0	0	0	0	0	0	0	0	12.5244	0	0	0	0	0	21.6935	0	0	0	0	0	0	0	0	0	0	0	0	0	0	0	0	0	0	0	0	0	27.9512
HERVH_19q13.32c	0	0	-4.06138	-4.65114	0	0	-8.85334	-6.51164	0	-0.494827	-6.49306	-2.35621	-11.2277	0	-4.62091	0	-13.1881	0	0	0	-2.09126	-6.47439	-6.47512	-7.74777	0	0	-10.1628	-5.13649	0	-4.85434	-3.38288	-6.54586	-7.81198	0	-7.04667	0	-5.74401	-8.01056	0	0	-3.51725	-9.47176	-7.99076	-5.73234	-3.95636	-0.391808	-14.0786	-12.5441	-10.537
HERVH_19q13.32d	0	0	-5.92174	-8.63518	0	0	0	-11.0435	0.897224	0	0	0	-12.6209	1.01904	0	-7.83108	-17.3593	0	0	1.69281	-5.84023	-10.8266	-11.2424	-9.89962	-11.2516	0	-21.0119	-9.43854	-6.0415	-9.97001	-7.82671	0	-8.37264	0	-13.7384	0	0	-13.8684	0	0	0	-10.4219	-11.335	0	3.30403	2.74517	-16.5111	-11.5898	-16.9052
HERVH_19q13.41a	0	8.71681	0	-24.6294	-8.56383	5.10085	-31.2664	-32.5762	14.1329	-2.30993	-33.0828	-11.4228	-42.7676	16.2354	-22.4928	-17.5179	-71.1277	12.1881	0	4.79954	-12.3694	-42.4696	-30.8023	-38.5852	-34.8207	0	-74.684	-28.1284	-9.72818	-39.9052	-13.5284	-32.8883	-33.3662	0	-65.8396	0	-19.8307	-34.763	0	0	-14.6038	-31.0386	-38.8518	-27.6354	11.7328	9.30426	-74.5411	-59.7814	-67.4898
HERVH_1p31.1a	-0.951163	10.9271	-6.78534	-10.1123	3.27875	3.4111	0	0	9.19355	-2.69211	0	0	-11.9138	8.21149	-8.75735	-7.6151	0	3.05573	0	0	4.16244	0	0	-8.26386	0	0	0	-6.59523	0	0	0	0	0	0	0	-2.29143	0	-15.7401	2.34556	0	0	0	0	0	0	0	0	0	0
HERVH_1p31.1e	0	0	0	0	0	0	0	0	2.04373	0	0	-5.54301	0	5.68075	0	-8.02003	0	2.26446	0	1.91288	8.75067	0	0	0	0	0	16.4915	-6.1976	-6.10399	0	0	-8.04804	0	0	0	0	0	0	1.94871	0	0	0	12.095	0	0	4.34948	0	0	16.4363
HERVH_1p31.1f	0	0	0	0	0	-0.429862	0	0	0	0	0	0	0	0	0	0	0	0	-3.94771	0	0	0	0	0	0	0	0	0	0	0	0	0	0	0	0	-2.58584	0	0	1.82257	0	0	0	0	0	0	0	0	0	0
HERVH_1p31.1i	0	0	0	0	0	0	0	0	0	-0.814718	0	0	0	0	0	0	0	0	0	0	0	0	0	0	0	0	0	-4.4721	0	0	0	0	0	-0.330138	0	0	0	0	0	0	0	0	0	0	0	0	0	0	0
HERVH_1p31.3d	-2.34325	0	0	-13.2357	0	0	0	0	0	-1.67876	0	0	0	0	0	0	0	0	-3.26996	7.91603	11.9081	0	0	0	0	4.99452	21.6633	0	0	0	0	0	0	0	0	0	0	0	0	0	0	0	0	0	12.9224	10.0832	0	0	20.5714
HERVH_1p33	-6.94616	22.7244	-28.7456	-66.1187	-12.8491	16.9992	-38.3874	-56.8161	26.6216	-4.99226	-42.0716	-42.394	-89.703	27.8429	-27.3883	-62.2628	-120.149	26.7193	-13.7884	0	-10.0041	-70.7836	-97.3885	-61.0106	-65.7147	14.2316	-97.1605	-82.4082	-40.6124	-71.634	-35.619	-80.8636	-62.2861	-5.46554	-81.5376	-10.0996	-43.0806	-76.5143	14.7645	16.4204	-36.1739	-83.4174	-72.1195	-39.2873	33.5501	29.7333	-127.954	-102.995	-85.6308
HERVH_1p34.2a	-2.3244	0	0	-10.8767	-4.65199	0	0	-8.02109	7.45226	0	-10.1929	-5.21907	-17.7496	5.86874	0	-7.22121	-13.3519	6.37553	0	0	0	0	-8.17365	-11.3174	-12.3435	0	-14.8355	-8.32301	-7.4462	-15.166	0	-16.5952	0	-1.89793	-17.6833	0	0	0	0	5.66878	0	0	0	0	0	0	-22.174	-17.4148	-14.408
HERVH_1p34.3c	0	0	-16.0613	-27.1357	0	3.03941	-29.617	-31.5194	10.1429	0	-24.1571	0	-36.5303	11.3743	-23.6162	-15.6646	-53.3117	9.13953	0	4.13825	-10.9741	-31.8105	-30.2591	-30.5395	-33.0598	0	-51.1046	-24.1627	-11.8743	-29.0781	-22.3507	-27.947	-30.1579	-1.89701	-47.7424	0	-18.4417	-35.8744	2.81636	0	-17.0353	-25.131	-32.1713	-21.9507	17.3408	12.1188	-51.2272	-47.0036	-44.5648
HERVH_1p35.2	0	0	0	0	-0.315681	0	0	-6.66588	0	0	0	0	-9.68275	0	-4.84508	-6.58006	0	0	0	-0.364906	0	0	-10.2202	0	0	0	0	-6.34645	0	0	-5.6418	-6.55102	0	0	0	0	0	-7.28819	0	0	0	0	0	0	0	0	0	0	0
HERVH_1q24.2	0	10.1756	0	-25.6435	-11.5548	4.35551	-20.3186	-27.6968	0	0	0	-17.9719	-39.0682	0	-20.5361	-22.1642	-47.1631	0	-6.30948	8.89223	0	-21.7081	-40.0392	-39.6115	-27.691	0	-33.8374	-35.2358	-15.058	-31.4422	0	-34.8047	-27.9694	-3.47452	-29.8284	-6.43802	-20.2294	-49.3916	0	0	0	-40.8167	0	-20.8819	18.7572	13.7261	-54.0031	-41.5538	0
HERVH_1q25.2	0	0	0	0	0	-1.07531	0	0	0	0	0	0	0	0	1.94792	0	0	0	-1.58408	0	0	0	0	0	0	0	0	0	0	0	0	0	0	0	0	-1.25188	0	0	0	0	0	0	0	0	0	0	0	0	0
HERVH_1q31.1a	0	0	0	-23.8576	0	0	0	-15.2226	6.11938	0	0	-17.0414	-29.6998	0	0	-24.2374	-38.8034	13.5296	-2.67266	1.51236	0	-21.2069	-38.6321	-16.1216	-15.6893	5.09656	-26.9203	-35.8898	-18.0386	-25.4344	-12.0864	-28.4074	-18.7055	0	-24.034	-1.84331	0	-21.4224	0	8.66895	0	-27.8523	-21.4324	0	0	11.9576	-42.9969	-23.5855	-22.0063
HERVH_1q31.3	0	3.06374	-5.78355	-9.35396	0	0	-12.1598	-10.6655	0	0	-6.58367	0	-13.4627	0	0	-7.07498	-19.843	1.85897	0	0	-7.86391	-12.1062	-12.3816	-14.525	-11.9112	0	-29.7989	-8.6188	0	-8.30461	-7.65019	-8.39207	-7.42399	0	-16.7227	0	-5.236	-18.1453	0	0	-7.27623	-12.4259	-15.897	0	0	0	-21.7551	-18.1429	-21.1301
HERVH_1q41e	-1.864	4.17887	0	0	-5.14031	0	0	0	0	0	0	0	0	0	0	0	-9.86765	0	0	0	0	0	0	0	0	2.7895	0	0	0	0	0	0	0	-1.8052	0	0	0	0	0	0	0	0	0	0	0	2.95689	0	0	0
HERVH_1q41f	0	0	0	0	0	0	0	0	0	0	0	0	0	0	0	0	0	0	0	0	0	0	0	-10.8517	0	0	0	0	0	0	0	0	0	0	0	0	0	-9.53454	0	0	0	0	0	0	0	0	0	0	0
HERVH_1q41g	-3.48156	0	0	0	-7.63012	0	0	0	0	-1.91667	0	0	0	0	0	0	0	0	0	0	0	0	0	0	0	4.76104	0	0	0	0	0	-11.4743	0	0	0	0	0	0	0	9.9894	0	0	0	0	0	0	0	0	0
HERVH_1q41h	0	0	-13.1827	-16.2978	0	0	0	-19.4369	0	0	-16.2174	-9.00397	-25.9473	0	-12.9491	-18.4946	-30.4954	0	-4.2833	0	0	-16.4397	-27.2347	-12.7808	-17.3995	0	-24.5014	-20.08	-13.1486	-19.8154	-18.5881	-20.1175	-16.473	0	-25.6065	0	-11.6667	-20.5471	0	0	0	-17.92	-23.1099	-12.2255	6.89359	4.67685	-32.0144	-26.8947	-20.7752
HERVH_1q42.13b	-0.418967	0	0	0	0	-1.82676	0	0	0	-0.423311	0	0	0	0	0	0	0	0	-0.96373	0	0	0	0	0	0	0	0	0	0	0	0	-4.74986	0	-0.871297	0	0	0	0	0	0	0	0	0	0	0	0	0	0	0
HERVH_1q42.13c	-4.6557	0	0	-51.0119	-11.084	0	0	-30.4303	14.9398	-3.15859	0	-29.6526	-65.0633	0	0	-42.1566	-74.5838	24.1342	-13.5664	0	0	-33.7313	-69.7989	-41.8715	-26.7809	14.8651	-51.4026	-61.8116	-30.6219	-40.2087	-18.8384	-58.7468	-35.5196	0	-45.733	-9.35099	-30.4914	-54.6771	9.87468	16.4445	-17.6452	-56.4153	-40.5077	0	22.9351	24.0341	-82.9957	-58.4151	-36.4766
HERVH_1q42.2e	-2.67756	8.02915	0	-11.4027	0	0	0	-12.395	8.67828	-3.19259	0	0	-20.1251	0	0	-12.868	0	8.37887	-5.48553	0	0	0	0	0	-17.2286	9.52153	0	0	-11.0271	0	0	-12.1489	0	0	0	0	0	-18.0835	4.38243	11.7588	0	0	0	0	0	12.0597	0	0	0
HERVH_20p11.23b	0	0	0	-5.34446	0	0	0	-6.80539	0	0	0	-2.78185	-10.1523	0	0	-4.56242	-10.6802	1.86191	0	0	0	0	-7.77842	-10.2775	0	0	0	-7.63584	0	0	0	0	0	0	-15.1442	0	0	-9.86406	0	0	0	-7.41295	0	0	0	0	-12.6082	-12.1111	0
HERVH_20p12.1c	0	0	0	-7.19745	0	0	0	0	0	0	0	0	0	0	0	0	0	0	0	0	0	0	0	0	0	0	0	0	0	0	-5.5338	-4.16796	0	0	-5.83373	0	0	-5.36442	0	0	0	0	0	0	0	0	0	0	0
HERVH_20p13b	0	0	0	0	0	0	0	0	0	0	0	0	0	0	0	0	0	0	0	0	0	0	0	0	0	0	0	0	0	0	0	0	0	0	0	0	0	0	0	0	0	0	0	0	0	0	-0.407816	-0.407816	0
HERVH_20q13.12c	-4.81343	14.4643	-18.5442	-48.584	-9.57487	17.7832	-29.0779	-46.4978	14.7317	-3.39313	-36.8021	-33.0054	-72.2345	16.751	-21.6436	-42.862	-99.0961	25.5147	-10.7974	0	-9.62731	-60.8974	-78.3925	-61.4308	-41.9544	12.2746	-83.3742	-64.8507	-27.745	-53.9091	-25.2424	-65.6598	-49.3093	-3.15669	-67.1168	-7.04907	-32.1152	-73.2243	10.7938	16.1628	-23.947	-69.9701	-65.9784	-37.1931	25.75	28.5825	-104.813	-76.7905	-70.2883
HERVH_21q21.1b	-1.48749	0	0	0	0	8.2683	-14.3639	0	0	-0.39002	0	0	-7.58053	0	0	0	-15.1562	0	0	0	-4.89487	-13.1417	0	-8.40542	-8.80174	4.31787	-19.5234	0	0	0	0	-7.60434	-9.90687	0	-10.0311	0	0	-7.21675	0	6.48286	0	0	-13.7686	0	0	0	-15.0914	-13.4009	-22.1183
HERVH_21q22.2	0	0	0	-38.3047	0	0	0	-25.6959	14.9544	-1.89429	0	-23.6254	-44.9451	0	0	-36.4258	-54.8774	16.8032	-4.79839	0	0	-32.9596	-58.7631	-30.0484	-23.388	9.26017	-42.3418	-47.2751	-19.7308	-31.7785	-19.0736	-39.4925	-27.6743	0	-33.0855	0	-23.2363	-40.2642	0	0	-22.0741	-45.5587	-36.8919	0	0	17.4828	-61.8926	-46.9909	-32.8705
HERVH_21q22.3	0	-0.142384	0	0	0	0	0	0	0	0	0	-1.65998	-4.5208	0	0	0	-3.45403	0	0	0	0	0	0	0	0	0	-3.87052	0	0	0	0	0	0	0	0	0	0	-2.5331	0	0	0	0	0	0	0	0	-6.64403	-4.56732	-4.7204
HERVH_22q11.1	-0.641526	0	0	-12.3208	0	0	0	0	0	0	0	-10.7823	-15.912	9.11018	0	-19.3672	-18.6164	0	-6.02684	0	0	-11.8795	-23.2024	-6.89038	0	0	-14.0941	-16.9448	-9.09872	-14.2365	0	-15.6484	-9.81189	-1.20927	0	-3.78969	0	-11.8894	0	0	0	-16.0502	0	0	0	4.94195	-24.0421	-14.6019	-12.0341
HERVH_22q13.1b	0	5.50891	0	0	-6.66085	5.79634	0	-17.3588	5.8202	0	0	0	0	0	-11.5203	0	0	0	0	0	0	-16.2922	0	-21.0219	-14.9673	0	-28.6501	0	0	-14.9776	0	-13.0262	-16.8631	0	-21.3712	-2.98819	0	-28.2209	0	0	0	0	0	0	0	0	-25.4855	-25.0147	-20.9874
HERVH_2p11.2c	0	0	-7.82161	-12.1249	-5.28565	0	-11.6637	-22.2772	8.65719	0	-16.3805	0	-19.224	7.72377	-16.3275	-10.9622	-31.783	0	-5.59449	0	0	-17.2299	-17.4934	-24.934	-20.5778	0	-32.322	-14.2642	-7.38335	-18.5027	0	-16.6131	-15.679	-2.2143	-28.4298	0	-12.1877	-29.5006	0	0	0	-19.4791	-19.0499	-13.3825	0	0	-34.9751	-33.2238	-26.272
HERVH_2p11.2d	0	0	0	-4.74587	0	0	0	0	-0.51092	0	-6.49356	-5.54681	-5.25122	0	-5.11925	-4.17337	-9.82492	-0.710976	0	0	0	-10.0677	-6.53301	-7.03683	0	0.146759	-10.1393	-4.21681	-1.78137	-6.16599	-5.04735	-6.026	0	0	-7.7615	0	0	-9.1941	0	-0.561411	-3.99534	-7.48392	-5.54712	0	0	0	-10.3211	-9.06594	-9.56298
HERVH_2p12a	0	0	-6.05704	-11.5755	0	0	-10.5255	-8.04144	0	-0.944004	0	0	0	0	0	0	0	0	0	4.65171	0	0	-7.5585	0	-9.3449	1.66764	0	0	-5.70387	0	-8.14318	-8.60621	0	0	0	0	0	-10.0409	0	0	0	0	0	0	0	7.29112	0	0	0
HERVH_2p12d	0	0	0	0	0	2.78423	0	0	0	0	0	0	0	0	0	0	0	0	0	0	0	0	0	-8.11623	0	4.81467	0	0	0	0	0	0	0	0	0	0	0	-12.9509	0	0	0	-9.35093	0	0	0	0	0	0	0
HERVH_2p16.1c	0	0	0	-3.93406	0	0	-6.74677	-4.29642	0	0	0	0	-5.31625	0	0	-2.84378	-7.30892	0	0	0	-1.78378	-4.71332	0	-5.14864	-5.53721	0	-8.09883	0	0	0	-4.26692	0	-3.79653	0	0	0	0	0	0	0	0	0	0	0	0	0	-7.47481	-6.12682	-7.19071
HERVH_2p16.2	0	0	-2.77011	-4.72169	0	0	-7.37053	0	0.00334879	-0.0103648	0	0	0	0.0154484	0	0	0	0	0	2.94856	0	0	0	0	0	0	2.1009	0	0	0	0	0	0	0	0	0	0	0	0.066218	0.459718	0	0	0	0	1.60001	5.02476	0	0	1.92131
HERVH_2p22.2c	-4.33803	11.7837	0	-42.6928	-11.9503	0	-26.3476	-30.4698	18.5054	-2.45704	-26.1599	-20.1414	-53.8325	0	0	-33.3308	-72.5843	25.4805	-14.2492	0	-10.7233	-43.1476	-57.8289	-34.4973	-32.6332	10.2096	-55.4949	-47.4965	-21.9979	-39.827	-20.3695	-50.4358	-37.9279	0	-52.4122	-11.4358	-24.0087	-43.0493	9.00919	12.2103	0	-43.2685	-45.9577	-23.5922	25.7025	25.5772	-73.4083	-57.1252	-48.3209
HERVH_2q23.3c	0	0	0	-6.14909	0	0	0	0	0	0	0	-9.67015	-11.3182	0	0	-6.43918	-10.4223	0	0	0	0	0	-10.3578	0	0	0	0	-11.1798	-7.14598	-9.63403	0	-10.5916	0	0	0	0	0	-5.90882	0	0	0	-10.7125	0	0	0	0	-11.3267	0	0
HERVH_2q31.1a	-2.12805	0	-6.86131	-16.0872	0	0	0	0	3.05718	-1.37728	0	-7.30204	-11.9032	0	-9.49714	-13.952	-13.7954	0	0	3.7102	-3.7995	-10.2456	-15.8271	0	-10.4067	0	0	-14.0812	-9.01012	-9.13106	-8.20436	-14.413	0	0	0	0	0	-12.5406	0	0	-8.33066	0	0	0	0	5.90345	-16.0021	0	0
HERVH_2q31.1c	0	0	0	-8.8014	-3.01866	0	0	0	0	0	0	-8.02904	0	0	0	0	0	0	0	0	6.87144	0	0	0	0	0	0	0	0	0	0	0	0	0	0	0	0	0	0	0	0	0	0	0	0	0	0	0	0
HERVH_2q32.1c	0	0	0	-39.9898	0	0	0	0	18.3955	-3.09187	0	-24.0879	-41.9323	18.8873	0	-33.6322	-41.247	19.2759	-8.84053	0	0	0	-45.6861	-18.9559	0	11.5405	0	-45.9094	-26.4733	-25.0772	0	-42.4921	0	0	0	-4.9848	0	-29.4377	0	14.2204	0	-35.8094	0	0	0	17.7959	-49.3799	-31.7066	0
HERVH_2q33.2	-5.1871	18.3511	-18.8874	-54.7757	-15.7568	17.7966	-29.1613	-45.9731	23.9566	-5.62311	-32.3919	-36.2497	-74.1047	22.7799	0	-49.5625	-98.0291	16.4051	-10.2598	14.7043	-13.1553	-59.2066	-82.2943	-56.6358	-53.2086	12.0977	-80.6507	-73.2955	-33.6235	-65.3776	-24.7211	-71.3271	-50.7992	-7.21674	-64.6985	-7.11746	-25.1525	-73.8316	7.5646	17.6483	-22.7428	-70.6736	-55.0453	-33.378	36.8688	28.4651	-109.681	-74.3961	-74.4637
HERVH_2q33.3a	-2.33927	0	0	0	0	0	0	0	0	0	0	0	0	0	0	0	0	0	0	0	0	0	0	0	0	1.20863	0	0	0	0	0	0	0	0	0	0	0	0	0	0	0	0	0	0	0	12.6309	0	0	0
HERVH_2q35a	0	0	0	0	0	0	0	0	0	0	0	0	0	0	0	0	0	0	0	1.68761	0	0	0	0	0	0	0	0	0	0	0	0	0	0	0	0	0	0	0	0	0	0	0	0	0	0	0	0	0
HERVH_3p12.3a	-4.06559	8.88892	-10.4307	-19.3844	0	7.89425	-18.4305	-18.1478	20.3441	-2.37967	0	0	-18.9091	16.4496	0	-9.65992	-27.9821	18	-4.92582	7.03199	0	-19.513	-21.8924	-19.4169	-17.6474	5.8362	-23.0498	-16.0133	0	-14.0156	-13.0155	-16.8264	-17.2515	0	-27.1626	0	0	-26.3046	0	8.75573	-12.0381	-24.1505	-23.3387	-11.9229	14.0372	14.9457	-24.5792	-34.836	-20.0993
HERVH_3p14.3b	0	0	0	0	-2.92962	0	0	0	0.852859	-1.35147	0	0	0	0.872814	0	0	0	0	0	0	0	0	0	0	0	-0.579955	0	0	0	0	0	0	0	-2.44126	0	0	0	0	0	0	0	0	0	0	0	0	0	0	0
HERVH_3p21.31a	-4.85421	15.6579	-27.6316	-57.1806	0	17.7869	-42.7799	-59.9924	25.4226	-3.06199	-48.5862	-22.5792	-82.6237	25.138	-34.5092	-53.9096	-115.681	24.1505	-11.3684	10.2769	-12.5106	-69.8421	-80.9809	-62.2647	-67.8015	10.6613	-98.5348	-66.4613	-28.6229	-61.1652	-38.0576	-65.0012	-59.9762	-3.83505	-93.9556	0	-37.6926	-75.116	6.39209	13.4251	-35.3603	-64.4175	-67.6611	-42.505	29.6133	24.1788	-118.95	-100.497	-89.9756
HERVH_3p21.31e	-2.53506	15.5275	-11.8482	-28.3648	0	7.27974	0	-27.9877	10.3791	-1.5552	-20.0366	-18.1868	-47.7661	0	-19.8989	-26.3013	-72.0502	12.2324	0	6.20456	0	-33.9302	-47.8679	-37.2835	-32.5916	0	-41.6017	-40.9468	-16.9623	-36.2396	-12.5559	-36.3375	-25.5567	0	-34.9886	0	0	-44.7617	3.94582	0	0	-37.6747	-30.2457	-24.0926	23.8779	9.91283	-61.3137	-34.8876	-36.1268
HERVH_3p22.2b	0	0	-10.1585	-21.9259	0	0	-18.4811	-16.497	0	0	0	-6.95809	-27.8527	0	0	-16.2563	-35.6229	0	-2.87392	2.92771	-8.05542	-21.996	-24.238	-17.3692	-20.3191	5.43922	-34.9873	-19.9715	-9.30446	-15.8897	-14.0932	-24.138	-20.4861	0	-30.2803	0	0	-19.2925	0	0	0	-14.2036	-27.5649	-11.1554	0	0	-36.9948	-27.7162	-32.5149
HERVH_3p22.3a	-1.83202	0	0	0	-2.53648	0	0	0	0	0	0	0	0	0	0	0	0	0	0	0	0	0	0	0	0	0	0	0	0	0	0	0	0	-1.87454	0	0	0	0	0	0	0	0	0	0	0	0	0	0	0
HERVH_3p22.3b	-4.586	18.7576	-25.9254	-64.7442	-9.90788	24.1067	-37.2441	-63.3058	40.9188	-3.07203	-47.7034	-45.0763	-94.4687	44.2621	-36.9574	-59.8377	-133.366	26.4733	-7.86181	13.2752	-16.2809	-82.1984	-103.346	-72.2265	-65.014	12.4439	-113.674	-88.9911	-38.7674	-79.9043	-34.4692	-81.8796	-66.328	-3.69	-93.0042	-5.58934	-39.1385	-88.0416	7.88732	13.5633	-35.5745	-88.8332	-79.5631	-49.5034	42.5106	29.003	-142.466	-101.129	-98.1841
HERVH_3p26.3b	-2.55603	0	0	-28.7268	0	0	0	-26.3118	12.4729	-1.68608	0	-13.0993	-39.2244	14.2742	0	-26.6909	-59.8372	10.9916	-7.57334	10.0877	-10.4436	-37.8392	-44.0163	-26.4072	-27.8565	9.35689	-50.6416	-40.0281	0	-29.2818	-14.751	-35.4524	-31.3459	0	-40.1178	0	-19.215	-36.2193	0	12.739	-13.7375	-32.0991	-36.0885	-19.5179	17.8235	17.9739	-57.3352	-43.666	-51.637
HERVH_3q11.1	0	8.00777	-11.2194	-28.7453	0	5.4167	-19.6272	-27.3778	15.9428	0	-22.5295	-23.5334	-40.2169	18.7669	-18.6425	-27.4769	-71.8294	0	0	6.30051	-12.5162	-43.5346	-48.8151	-29.6314	-29.4764	0	-58.9239	-45.4583	-17.0328	-35.8193	-17.4908	-37.8411	-33.1288	0	-45.7069	0	-23.1825	-39.7187	4.78762	0	-14.6236	-39.8893	-43.9077	-21.5161	0	16.4571	-68.6069	-49.2908	-54.1876
HERVH_3q13.2	-4.06509	13.8101	-14.6837	-43.0072	-9.40665	13.1439	-28.0907	-42.2974	22.0996	-2.61085	-31.8459	-24.9789	-61.782	22.9147	0	-38.4615	-83.0626	23.3346	-11.2711	13.6122	-13.488	-57.3576	-67.0707	-46.9693	-43.9238	11.0779	-80.3493	-57.74	-24.5543	-48.5371	-22.1403	-51.6245	-46.2982	-3.3307	-65.8705	-8.09606	-26.8415	-61.7524	7.12071	12.4113	-21.8454	-57.3351	-59.2698	-29.9706	21.8888	26.9819	-93.5609	-74.7691	-69.537
HERVH_3q13.31b	0	0	-9.02197	-27.4391	0	0	0	-19.7853	0	0	-13.622	-21.8254	-36.0552	0	-12.1307	-31.6641	-54.2429	0	-9.09398	6.83119	0	-17.7173	-36.5458	-19.1439	-19.5564	0	-29.1976	-36.2217	-20.5269	-26.5425	-12.6872	-32.7851	-17.1913	-1.70041	-26.3785	-4.16143	0	-23.3193	0	0	-11.0324	-26.2364	0	-12.6562	26.8275	7.80157	-51.6959	-31.3701	0
HERVH_3q21.3a	-4.41857	23.196	0	-29.0675	-8.00385	23.205	0	-23.074	19.6811	-4.87395	-18.0335	-22.722	-44.7151	0	0	-36.6756	-58.9511	13.1727	-10.4499	0	0	-33.7764	-52.978	-29.4536	-33.1923	13.3778	-43.0663	-46.17	-21.762	-39.1188	-12.6135	-45.4313	-29.133	-5.60286	-41.6364	-6.96292	-16.7578	-35.101	9.09167	19.5786	-14.0538	-45.477	-33.0345	-19.8601	30.3396	19.0855	-67.7687	-51.7921	-43.3616
HERVH_3q21.3b	0	0	0.112347	0	0	0	0	0	0	0	0	0	0	0	0	0	0	0	0.0104497	0	0.0393512	0	0	0	0	0	0	0	0	0	0	0	0	0	0	0	0	0	0	0	0	0	0	0	0	0	0	0	0
HERVH_3q21.3c	0	0	0	0	0	0	0	0	0	0	0	0	0	-1.74609	0	0	0	0	0	0	0	0	0	0	0	0	0	-1.28386	-1.45566	0	-2.12199	-1.5422	0	0	0	0	0	0	0	0	0	0	0	0	0	0	0	0	0
HERVH_3q21.3d	-1.8695	0	0	0	0	0	0	0	1.85211	0	0	0	-4.96701	0	0	0	0	2.97226	0	0.860259	0	0	-3.46886	0	-5.92876	1.84146	0	-3.69203	-3.46409	-5.62951	-3.15154	-7.59363	0	-1.52489	0	-0.522904	0	-2.9563	0	0	0	0	0	0	0	1.82996	-6.77527	-4.69039	0
HERVH_3q22.1e	0	0	0	-9.21113	-5.18904	0	-12.0996	-21.0875	0	0	0	-8.26198	-19.5707	0	-15.8619	0	-19.9264	0	0	0	0	-14.5018	-13.9656	-22.9275	-19.3382	0	-27.7161	-11.6794	-8.59034	-22.5666	0	-15.1287	-14.1896	0	-25.3066	0	-10.7789	-28.8445	0	0	0	-20.9276	-14.2756	-11.7229	0	0	-32.8732	-27.5236	-25.5841
HERVH_3q23a	0	-2.93903	0	-6.04191	0	-3.06406	0	0	-3.63221	0	0	-4.85062	0	-1.89824	0	-7.55533	-13.9348	0	0	0	0	-11.01	-11.4731	0	0	0	-15.3693	-7.82988	0	0	-4.24423	0	0	0	0	0	-5.59192	0	0	0	0	-8.44273	-12.1026	0	0	0	-11.7599	0	-15.5473
HERVH_3q25.1	-1.63447	0	0	0	-2.98884	0	0	0	0	-0.826039	0	0	0	0	0	0	0	3.49352	-1.3922	0	0	0	0	0	0	3.8435	0	0	0	0	0	-8.02887	0	-1.41721	0	-2.60842	6.43387	0	0	0	0	0	0	0	0	0	0	0	0
HERVH_3q26.1a	0	15.4813	0	-15.5804	0	17.6546	0	-21.6883	17.8873	-3.47361	0	0	-30.3086	11.7783	0	0	0	0	0	6.21877	0	0	-25.3086	-26.2293	-17.8428	0	0	-24.2593	0	-19.0005	0	-15.6564	0	0	0	0	0	-41.7989	0	0	0	-22.7837	0	0	16.8648	8.26296	-34.3052	-27.7746	0
HERVH_3q26.1b	0	9.85591	0	0	0	16.1282	0	-19.0573	14.8082	0	0	0	-25.7902	10.0272	-15.6123	0	0	3.70861	0	0	0	0	-22.8093	-27.5482	0	4.44644	-18.7239	-19.0315	0	-16.1508	0	-16.3756	-13.4934	0	0	0	0	-38.7621	0.816231	0	0	-28.6378	0	-16.8692	0	6.90197	-28.8639	-28.1757	0
HERVH_3q26.1i	-4.98212	11.1679	-20.2915	-45.4338	-10.8405	10.5923	-25.6318	-41.3875	9.71885	-4.63253	-31.5099	-25.0695	-57.5287	15.6515	-20.0519	-42.1285	-82.6604	10.05	-11.1932	13.5263	-11.1971	-54.5746	-67.9816	-46.4481	-45.4809	8.25193	-70.2538	-59.0889	-28.8673	-52.3148	-25.2482	-58.501	-47.9938	-6.73961	-64.2195	-8.36383	-20.943	-58.991	8.35522	18.2155	-18.1522	-57.1646	-55.0038	-28.293	26.8154	21.494	-89.517	-72.6398	-63.7471
HERVH_3q26.1j	0	3.07915	0	-7.0093	0	6.30733	0	0	5.5908	-2.54813	0	0	0	0	0	-6.6307	-11.9902	0	0	2.24923	-4.55274	-11.3463	-13.8195	0	0	0	0	-11.1351	0	0	0	-10.3636	-11.6677	0	0	0	0	-9.2596	0	0	0	-12.8104	-11.026	-8.29916	0	7.81598	-11.0868	0	0
HERVH_3q26.31c	-1.15649	0	0	0	0	0	0	0	0	0	0	0	0	0	0	0	0	0	0	0	0	0	0	0	0	0	0	0	0	0	0	0	0	0	0	0	0	0	0	0	0	0	0	0	0	0	0	0	0
HERVH_3q26.32c	0	0	0	0	-9.80736	0	0	0	0	0	0	0	0	0	0	0	0	6.87854	-3.52193	0	0	0	0	-16.0771	0	7.25084	0	0	0	0	0	-14.8855	0	0	0	0	0	-14.9899	0	0	0	0	0	0	0	0	0	0	0
HERVH_3q28a	0	12.9328	-20.9923	-47.5326	-10.5358	0	-30.3903	-43.1621	16.408	-2.59445	-36.7899	-27.3782	-67.5172	17.5532	-22.0583	-41.1187	-94.3464	19.0273	-13.0211	0	-13.713	-60.8776	-77.4681	-50.4946	-40.5794	9.1214	-84.3409	-60.0381	-23.8204	-50.0843	-28.4012	-61.5838	-50.4216	0	-63.029	-8.8078	-34.2762	-61.9777	6.76005	12.1405	-19.7314	-63.1611	-66.3411	-36.7619	23.4055	25.1412	-95.8467	-73.1211	-67.2144
HERVH_4p15.2a	0	0	0	0	0	0	0	0	0	0	0	0	0	0	0	0	0	0	0	0	-4.98625e-05	0	0	0	0	0	0	0	0	0	0	0	0	0	0	0	0	0	0	-0.000825075	0	0	0	0	0	0	0	0	0
HERVH_4p16.1b	-4.08162	0	-18.692	-38.2863	0	0	-22.6701	-32.5766	0	-2.26683	-28.5646	-13.4335	-44.7585	0	-18.3368	-37.8462	-66.28	11.0018	-11.8332	10.2416	-8.06012	-38.0098	-51.0407	-30.3608	-33.7807	9.27428	-51.6843	-43.0782	-22.7626	-39.019	-23.1136	-41.1558	-34.6575	0	-56.8644	-8.05571	-24.9329	-43.4822	5.89367	13.1638	0	-33.0794	-42.7287	-22.2814	0	17.1665	-65.5147	-56.7197	-46.324
HERVH_4p16.1d	-6.13677	14.228	-23.1678	-53.7898	-8.52467	12.0474	-26.6722	-42.7818	27.1135	-2.75829	-33.5743	-20.5223	-60.5327	30.2359	-21.4267	-49.6565	-96.4278	25.299	-10.84	14.6052	-11.9131	-54.0105	-71.973	-40.7176	-48.6428	10.5688	-79.0255	-59.215	-25.6847	-51.5929	-32.0547	-55.1878	-46.263	-4.84468	-66.9913	-6.28508	-31.4524	-55.9795	10.7776	12.6144	-26.2446	-48.305	-56.7505	-30.8463	28.6391	26.0695	-90.6947	-75.5062	-70.26
HERVH_4q13.2	0	0	0	-4.81504	0	0	0	-4.93767	0	0	-6.27964	0	-6.44064	0	0	-3.49156	-8.24192	0	0	1.8103	0	-7.66601	-6.23717	0	-5.5493	0	-7.76725	-4.45978	-3.28952	0	-5.21998	-6.53723	0	0	0	0	0	-6.11974	2.26393	0	0	-5.60524	0	-5.15852	6.65976	3.23898	-7.47782	-9.10798	-7.53913
HERVH_4q13.3	0	0	0	-14.8607	-6.7688	0	0	-26.7906	5.46961	0	-19.8464	-9.71071	-34.6022	0	-21.2064	-13.0512	-41.6731	6.38997	0	3.82075	0	-19.1164	-21.2314	-31.6435	-23.0314	0	-32.9121	-17.7415	-12.6004	-28.8238	-12.3155	-26.5888	-20.9901	0	-40.4433	0	0	-29.9233	0	0	0	-20.8073	0	-16.0855	0	0	-48.2034	-39.417	-27.2921
HERVH_4q21.3	-4.22442	13.8072	-15.5008	-35.7329	-11.523	19.5772	0	-30.6259	22.9714	-5.99549	-22.4428	-16.0228	-41.3425	26.0256	0	-28.0101	-62.373	21.001	-10.1227	10.5048	0	-38.9575	-47.1011	-32.3562	-35.6848	13.2952	-51.5051	-43.583	-18.7123	-35.9167	-15.29	-47.852	-35.4832	-5.79323	-45.303	-7.45779	-23.3306	-47.5178	10.1426	16.0407	-18.4628	-42.2775	-37.2754	-18.1806	20.3766	23.719	-61.9674	-55.6474	-50.4736
HERVH_4q22.1c	0	0	0	0	0	0	0	0	0	0	0	0	0	0	0	0	0	0	0.0466128	0.0345735	0	0	0	0	0	0	0	0	-0.540372	0	0	0	0	0	0	0	0	0	0	0	0	0	0	0	0.0123302	0	0	0	0
HERVH_4q22.3a	-6.78946	34.8681	-30.3023	-72.0937	-16.5941	22.2932	-40.2046	-67.7899	32.6824	-6.31621	-53.9449	-48.1555	-113.504	37.8704	-36.8345	-69.2163	-141.067	27.9927	-10.854	12.1502	-13.207	-81.1646	-113.364	-86.7512	-70.3146	18.0977	-122.008	-98.8792	-41.8708	-92.2385	-36.6151	-99.5971	-67.4082	-5.07976	-102.202	-6.42411	-37.6353	-105.283	11.2265	19.8602	-40.4133	-94.9363	-78.7153	-50.746	39.6096	34.4407	-162.274	-116.332	-101.932
HERVH_4q31.1a	0	0	-16.9484	-39.8374	0	0	-22.0075	-32.5595	11.288	0	-26.8193	-19.6356	-51.1359	16.5164	0	-37.3892	-73.938	10.2181	-7.61815	5.98795	-13.6741	-43.2626	-55.8685	-30.43	-34.094	4.57887	-61.8764	-43.0769	-20.3488	-35.4479	-25.4719	-40.5694	-34.8342	0	-47.4617	0	-28.3911	-44.2715	5.41512	12.5648	-13.0881	-46.1123	-47.2894	-22.9973	25.9917	12.9229	-73.5544	-54.5707	-55.9012
HERVH_4q31.21c	0	0	0	0	0	0	0	0	0.498422	0	0	0	0	0	0	0	0	0.0811155	0	0	0	0	0	0	0	0	0	0	0	0	0	0	0	0	0	0	0	0	0	0	0	0	0	0	0	0	0	0	0
HERVH_4q32.2c	-3.79293	12.5774	0	-21.2537	-7.14959	0	0	-10.9756	22.5267	0	0	-6.73787	-20.0949	20.0978	0	-18.3074	-22.2455	15.8657	0	10.7233	0	-12.0075	-21.4801	-11.0958	-12.6386	7.00652	0	-20.5061	-11.5542	-23.0172	0	-23.9832	-10.0488	0	-25.9321	0	0	-13.5568	4.88231	13.1123	0	-13.6976	0	0	15.325	15.023	-24.8096	-25.805	-14.2309
HERVH_4q35.2a	0	0	-10.4745	-19.7235	-7.39778	0	-22.6661	-17.318	0	0	0	-8.74678	-21.5835	6.39691	0	-7.96199	-37.6697	4.96397	0	3.79537	-9.3273	-25.4884	-24.9392	-18.8352	-18.8444	0	-39.7519	-20.7672	-10.0179	-19.7002	0	-18.0452	-24.3358	0	-24.5245	0	-16.2563	-20.2566	3.19869	0	-8.2195	-24.2807	-29.1184	-12.7533	11.7206	8.42767	-42.3127	-27.3273	-36.7804
HERVH_4q35.2c	-2.35306	0	-8.01057	-18.831	-3.32897	0	-23.8061	-19.5758	0	0	-16.2709	-4.30438	-26.8442	0	-12.3433	-12.2883	-37.6037	2.95627	0	2.46046	-8.22921	-20.2187	-15.1003	-22.9006	-27.9294	0	-42.7806	-13.3839	-7.13487	-21.8839	-11.442	-19.1361	-17.7522	-2.56022	-36.5877	0	-10.9189	-19.3086	0	7.47718	-11.929	-16.2892	-20.4545	-12.3785	9.70967	5.41627	-43.0016	-33.1219	-43.3413
HERVH_5p15.33	-7.1124	20.8022	0	-43.4742	-14.992	11.5628	-25.8068	-36.2581	25.9905	-5.53731	-27.3676	-19.158	-59.7039	25.7636	0	-35.8895	-66.0548	28.3052	-10.3478	13.1344	0	-30.7459	-52.6495	-37.8173	-42.271	16.8416	-51.7192	-50.8074	-25.6273	-42.4534	-23.2021	-57.2524	-33.549	-7.52568	-54.2848	-9.34407	-23.2651	-49.7209	12.7047	18.7818	-23.6736	-44.551	-35.5738	0	26.0932	27.3457	-75.9257	-69.472	-48.14
HERVH_5q22.1	-3.82679	0	0	-25.1432	-7.60648	0	0	-24.8621	15.6801	-1.83287	-21.1775	-9.85344	-33.7528	13.8374	0	-19.6863	-51.791	15.9551	-4.86763	9.04765	-10.4776	-28.156	-30.9928	-27.8034	-29.0492	7.24248	-45.1168	-24.5506	-11.1638	-27.598	-12.6158	-28.598	-27.2193	0	-43.0837	-4.13535	-14.5545	-28.5212	5.15762	15.0979	0	-24.8254	-31.1482	-15.0282	13.8584	16.9087	-47.2748	-37.9235	-46.0304
HERVH_5q23.2b	0	0	0	0	0	0	0	0	0	0	10.0578	0	0	0	0	0	27.6693	0	-1.49011	0	19.937	20.6874	0	0	13.0166	0	43.983	0	0	0	0	0	12.2494	0	17.1716	-3.70102	0	0	0	0	0	0	26.5215	0	0	0	26.3143	0	43.8008
HERVH_5q23.2e	-1.87243	0	-10.34	-18.2696	-7.08198	0	-19.1047	-18.6762	0	0	-14.7393	-12.6014	-27.0983	0	-16.6676	-14.3134	-32.4338	0	0	0	-5.46326	-23.0958	-26.5959	-27.3053	-24.707	0	-37.3621	-22.898	-11.5774	-28.8557	-9.32312	-24.6202	-22.4696	-1.96577	-30.0176	0	-14.0507	-30.9018	0	0	0	-29.7414	-21.1874	-14.5174	0	4.84583	-47.1107	-31.7388	-37.0761
HERVH_5q23.2f	-4.62363	11.7386	0	-31.6768	0	0	0	-17.0776	19.829	-3.08038	0	-16.541	-44.2549	0	0	-27.0953	-43.3389	23.1573	-6.70655	8.12851	0	0	-44.5103	-18.5201	-17.2638	12.9611	-31.9288	-44.7092	-21.1853	-26.8509	0	-39.4086	0	0	-29.5804	0	0	-27.1666	8.51954	14.3107	0	-28.6533	0	0	18.1099	19.8343	-57.0517	-33.2527	0
HERVH_5q31.1a	-2.5232	7.44611	-10.9965	-16.9759	0	0	-14.7678	-14.755	7.87279	-1.83714	-10.1416	0	-15.2824	0	-11.9683	-7.58514	-18.9055	7.13785	-2.6828	7.11812	0	-8.6747	-13.1296	-9.87672	-14.7114	3.04246	-15.2644	-15.1954	-11.3104	-14.2025	-12.98	-12.8192	0	-2.33467	-23.2406	0	0	-17.0061	0	0	0	0	0	0	0	12.7079	-19.9441	-20.5761	0
HERVH_5q35.1a	-3.30339	14.7882	-19.8195	-45.8288	0	7.84754	-28.3777	-37.1283	24.1462	-2.08207	-29.7364	-33.6183	-69.5858	22.1304	0	-53.1866	-89.3207	20.7965	-11.0529	0	-8.36055	-53.374	-72.1623	-44.5657	-38.1714	5.64836	-73.5221	-60.502	-27.5464	-48.2345	-22.4959	-52.4997	-46.2013	-3.20163	-61.7287	-6.27045	-30.8801	-52.4583	4.37609	9.57347	-25.1357	-65.3646	-59.3028	-32.2329	20.2664	21.1715	-95.7002	-70.8935	-60.8208
HERVH_6p21.2b	-3.19656	8.6969	0	-24.6929	-8.34684	7.40111	-20.9852	-15.9243	9.49426	-3.5596	-15.4469	-11.81	-28.4931	0	0	-11.6066	-36.2453	12.5978	0	7.21603	0	-17.9891	-25.9418	-27.4963	-22.6201	6.34051	-27.5913	-22.4089	0	-28.8774	0	-27.8549	-16.5285	-3.11597	-42.47	0	0	-28.6507	4.90753	11.4327	-12.1661	-29.9498	-22.5322	-11.6333	13.9775	12.8313	-47.1168	-38.0166	-31.0453
HERVH_6p21.32	-4.03777	28.3193	-18.5507	-54.2786	0	28.1195	-28.8807	-52.6264	39.7249	-3.34269	-35.1009	-41.2168	-81.3941	34.8099	-23.5614	-50.1249	-113.535	31.0232	-10.0291	11.7502	-12.682	-72.6581	-95.297	-67.3718	-54.4777	15.4344	-100.413	-81.0693	-28.4532	-68.995	-29.5591	-76.8136	-55.6946	-3.32386	-72.1304	0	-34.2736	-85.6251	9.16485	15.3476	-33.376	-81.2268	-74.4113	-42.3734	34.6725	30.7916	-125.473	-90.2155	-86.1624
HERVH_6p22.3a	-0.853797	0	0	-7.5797	0	0	0	0	0	-0.761163	0	0	0	0	-3.95223	-4.84597	0	1.31133	0	0	0	0	-3.93548	0	0	0.386037	0	-3.75666	-4.24216	0	0	-5.28252	0	-0.917984	0	0	0	-3.69731	0	0	0	0	0	0	0	0	0	0	0
HERVH_6p22.3d	-4.86713	15.0458	-14.635	-50.006	-11.9323	13.3308	0	-33.9904	22.9334	-5.17912	-25.7997	-31.7768	-64.0195	17.7117	0	-50.1432	-91.0618	18.9006	-9.2697	0	-11.6091	-50.1266	-75.6248	-37.9284	-42.8602	11.8603	-66.5376	-65.0408	-29.5642	-49.4899	-25.0964	-62.1208	-40.5022	-6.21085	-51.3049	-8.10132	-19.2669	-51.4628	6.87859	18.6368	-23.5848	-55.6412	-52.087	-26.0153	0	21.7036	-93.5554	-60.2872	-63.4537
HERVH_6p23	0	0	0	-23.86	0	0	0	0	0	-2.42536	0	0	-26.4908	0	0	-23.8503	-30.8214	16.0841	-4.57613	0	0	0	-29.9795	0	-16.2998	7.89354	-31.1472	-27.0898	-12.5732	-17.2256	0	-20.2455	0	0	-22.6211	0	0	-18.0593	0	11.4566	0	0	0	0	0	17.3649	-38.1755	-20.8801	-26.1036
HERVH_6q11.1a	-2.3417	7.74619	-24.6819	-41.421	0	0	-20.4189	-36.7802	21.8527	-1.53936	-26.4756	-22.0205	-47.091	29.796	-23.5275	-38.6712	-76.5778	16.7657	-4.61067	8.07303	-9.99891	-44.6607	-55.6022	-30.0279	-41.0015	4.00363	-60.29	-46.044	-26.3207	-39.1495	-26.605	-42.9316	-35.6411	-2.59839	-48.0379	0	-25.7652	-46.0002	5.38962	0	-20.0882	-39.9714	-48.9894	-24.8381	0	15.5698	-70.786	-55.807	-54.8529
HERVH_6q12c	0	6.46148	0	0	-2.75933	4.02607	0	0	9.30765	0	0	0	0	9.00096	0	0	0	0	-1.67292	0	0	0	0	0	0	2.00727	0	0	0	0	0	0	0	0	0	-4.04529	0	-13.8213	0	0	0	0	0	0	0	0	0	0	0
HERVH_6q14.1e	-1.97804	0	0	-22.3363	-7.54889	0	0	0	0	-2.58892	0	0	-21.7737	0	0	-20.4796	0	0	-6.43744	8.08781	0	0	0	0	0	4.76766	0	-15.9766	-10.4639	0	0	0	0	0	0	0	0	0	0	0	0	0	0	0	0	14.6053	0	0	0
HERVH_6q21a	-0.360676	0	0	0	-0.189488	0	0	2.52762	0	-0.773117	0	0	0	-0.608147	2.37201	0	0	0	0	0	0	0	0	0	0	0.301755	0	0	0	0	2.52936	0	0	-0.0449856	0	0.0995321	0	0	0	0	0	0	0	0	0	0	0	0	0
HERVH_6q22.1c	-4.69147	12.7413	0	-29.0303	-9.71	0	0	-19.917	0	-3.41902	0	-14.9372	-40.0362	0	0	-22.5066	-44.0779	13.344	-14.4302	0	0	-20.2597	-35.3763	-26.726	-19.4966	10.9047	-21.2528	-30.5404	-14.0607	-19.5916	0	-35.1834	-19.5425	0	-21.0762	-7.13098	-15.5076	-37.0422	10.9906	13.4655	-19.2391	-35.8973	-21.3545	0	15.1984	14.786	-38.0002	-28.279	0
HERVH_6q23.1	0	0	-20.4919	-39.9711	-8.80507	8.43443	-28.9047	-44.0327	8.26913	0	-32.5408	-21.0979	-60.337	10.466	-33.7542	-35.1912	-81.9405	7.39782	-10.3005	8.48402	-10.6688	-47.5773	-61.8827	-52.2408	-44.4961	0	-73.6974	-50.8451	-23.6248	-48.4046	-24.1695	-50.3822	-48.4571	-3.49108	-58.2013	-5.42151	-24.14	-63.8576	0	0	-17.9624	-52.735	-50.6223	-34.5277	25.5952	15.7982	-91.4245	-64.5734	-60.9698
HERVH_6q23.2a	0	17.1794	0	-51.8616	0	19.8987	0	-42.4264	29.8009	-2.46404	-26.3457	-32.1055	-68.542	24.9935	0	-48.4757	-83.5076	25.9535	-9.20766	0	0	-43.6616	-76.6344	-47.1261	-40.0906	12.513	-59.4294	-66.4078	-31.5328	-48.7877	-23.5205	-59.7522	-36.4753	0	-52.4337	-6.16614	-28.0725	-66.4451	5.7234	15.5035	-28.1315	-64.5182	-43.8208	-25.3122	28.4268	25.7194	-88.7569	-65.4588	-48.5457
HERVH_6q23.2b	-5.50902	27.2385	-23.8922	-63.8021	-12.8953	29.2274	-36.3718	-53.3388	35.8531	-4.13255	-33.1313	-42.1307	-88.7658	31.2854	0	-56.1516	-117.409	31.5336	-11.8452	0	0	-64.0246	-98.6346	-62.7765	-52.4705	17.8738	-88.3916	-84.9274	-36.336	-63.6101	-30.8918	-79.9237	-53.8955	-4.08752	-69.5923	-9.30056	-42.3204	-84.802	14.4104	16.0066	-35.152	-83.1014	-68.4421	-36.8901	27.6005	33.0993	-126.7	-94.1107	-69.8517
HERVH_6q23.2c	-5.54735	25.3983	-19.4103	-57.7143	-13.1184	26.7476	-30.8033	-48.3222	29.3399	-4.02483	-29.4686	-41.217	-79.6288	25.493	0	-50.2263	-97.9251	30.4384	-10.9905	0	0	-57.3742	-90.2397	-59.8219	-44.5782	16.6815	-82.0197	-78.3668	-36.2479	-63.0396	-26.523	-77.09	-49.7324	-4.14856	-68.7984	-8.64075	-35.2805	-79.2924	12.6475	16.8265	-28.0142	-78.4267	-57.1866	-32.3897	31.3871	29.0877	-113.533	-89.1163	-61.7815
HERVH_6q24.1b	0	0	0	0	-1.35825	0	0	0	0	0	0	0	0	0	0	0	0	0	0	0	0	0	0	0	0	0	0	0	0	0	0	0	0	0	0	0	0	0	0	0	0	0	0	0	0	0	0	0	0
HERVH_6q25.1	0	0	0	-11.7119	0	0	0	0	0	0	0	0	-18.3413	0	0	-11.8413	-16.7574	0	0	0	0	0	-17.3409	-9.62397	-11.3168	0	0	-16.6321	-11.6525	-12.6189	0	-15.0941	-9.22669	0	0	0	0	-14.2526	0	0	0	-13.2649	0	0	0	0	-23.7572	-13.9908	0
HERVH_6q25.2a	-2.9753	0	-14.2525	-30.1276	0	0	0	-18.3092	10.8539	-2.02191	-14.8808	-13.0342	-27.6657	0	0	-27.2656	-32.9702	0	-4.46635	8.07329	0	-17.6038	-31.1509	-14.3815	-18.9528	4.11325	0	-26.5463	-18.8705	-19.6534	-15.4003	-26.8363	-12.8264	0	-24.5044	0	-11.4209	-24.4892	0	0	-11.7811	-19.986	-18.6111	0	19.7382	14.7018	-30.7821	-27.9188	-13.1189
HERVH_6q25.3b	-3.54878	0	0	0	-6.85938	0	0	0	2.66899	-2.03899	0	0	0	0	0	0	0	4.01135	0	0	0	0	0	0	0	0	0	0	0	0	0	-10.614	0	-5.7344	0	0	0	0	0	6.51786	0	0	0	0	0	0	0	0	0
HERVH_7p14.3d	-2.34479	0	0	0	0	0	0	0	0	-0.460731	0	0	-6.5472	0	0	0	0	1.09935	-1.27953	0	0	0	0	0	0	0	0	0	0	0	0	0	0	-2.36567	0	-1.94749	0	0	0	0	0	0	0	0	0	0	0	-7.29823	0
HERVH_7p14.3f	0	0	0	0	0	0	0	0	0	0	0	0	0	0	0	0	0	0	0	0	0	0	0	0	0	0	0	0	0	0	-5.10664	0	0	0	0	0	0	0	0	0	0	0	0	0	0	0	0	0	0
HERVH_7p15.3b	0	0	0	0	-3.64721	0	0	0	0	-1.6302	0	0	0	0	0	0	20.7199	0	0	0	21.0165	18.5959	0	0	0	0	34.7024	0	0	0	0	0	0	0	0	-3.72338	0	0	0	0	0	0	15.6537	0	0	0	16.8207	0	32.2021
HERVH_7p21.1a	-4.44055	16.3318	-16.9504	-45.5295	-9.72417	19.0155	-34.6985	-44.2626	19.9491	-4.95197	-28.2276	-26.703	-65.1073	21.9181	0	-37.3799	-99.7776	17.4514	-10.9237	14.3606	-13.0955	-58.3684	-66.6478	-52.7629	-49.9228	11.9664	-80.9939	-59.2084	-23.1599	-53.2581	-21.3269	-55.8886	-49.1049	0	-72.5069	-7.23319	-28.8646	-65.4712	9.57071	15.9131	-21.5498	-59.0846	-62.4866	-32.5436	32.9361	30.1973	-99.6264	-76.5186	-77.8605
HERVH_7q11.21	-3.55983	0	0	-26.9934	-5.33872	0	0	0	0	-2.4331	0	0	-14.6275	0	0	-16.2501	0	0	-6.55733	0	20.1968	22.7779	0	0	0	4.80512	39.1263	-11.3605	-10.539	0	0	-12.8053	0	-2.27953	0	-4.61979	0	0	0	9.00749	0	0	20.9199	13.1677	0	8.68845	0	0	36.0206
HERVH_7q11.23a	-4.01287	16.8448	-19.8008	-52.3492	-7.43297	10.888	-37.5326	-55.0058	26.1067	-1.79625	-47.5016	-20.8143	-76.1453	26.5694	-27.9046	-49.3036	-113.472	20.0409	-9.9351	12.3122	-14.806	-65.8499	-75.0808	-55.5973	-57.7415	11.0817	-96.221	-62.7629	-26.1652	-60.7244	-33.5526	-62.6126	-55.9058	-3.28562	-89.7056	-6.11683	-35.082	-67.9806	8.0917	16.9833	-24.7262	-58.7553	-61.3403	-39.4045	29.4787	22.7191	-114.446	-92.2813	-85.1214
HERVH_7q21.2	-4.88363	10.6734	-26.7015	-59.1096	-10.8075	17.0955	-40.758	-60.0073	23.4537	-4.00891	-47.9553	-32.3622	-82.667	26.2228	-30.8404	-54.1201	-129.08	22.8768	-10.6799	0	-18.3702	-80.2099	-90.2758	-65.5846	-68.4247	13.6155	-117.187	-75.4875	-32.4917	-65.6467	-35.7412	-74.4232	-67.6957	-4.2213	-92.1839	-7.99268	-37.3629	-81.1686	6.65729	16.6418	-34.762	-74.6946	-80.7409	-45.4178	31.6212	26.9722	-136.608	-105.414	-105.076
HERVH_7q21.3b	0	9.15382	0	-15.3147	-6.30896	11.2512	-14.6949	-29.6021	15.1564	0	-28.9763	-10.0493	-33.141	0	-13.3874	-16.2962	-47.6739	12.9174	-4.91918	0	0	-30.5097	-36.2771	-41.4068	-22.5699	5.52184	-32.1844	-23.9411	0	-22.6643	-11.6947	-30.7712	-25.6607	0	-27.1411	-4.59493	-17.3148	-48.7861	0	8.66597	-14.6827	-44.5851	-26.5555	-25.4373	0	0	-40.6334	-36.2478	-28.914
HERVH_7q22.1b	0	0	0	-10.013	0	0	0	0	0	0	0	0	0	0	0	-9.63816	-17.5261	0	0	0	-5.58333	-12.1183	-13.7544	0	0	0	-14.2638	-12.1271	0	0	0	0	-9.06664	0	0	0	0	-8.60821	0	0	0	0	-15.0413	0	0	0	-16.0743	0	-15.2046
HERVH_7q22.3b	-2.64128	0	0	-15.822	0	0	0	0	0	-1.64796	0	0	0	0	0	0	0	7.36463	0	0	16.0202	31.0638	0	0	0	4.04132	39.8507	0	-10.4921	0	0	0	15.5595	0	0	0	0	0	0	0	0	0	23.6355	14.6134	0	0	0	0	40.7848
HERVH_7q31.2	0	4.69205	0	0	0	0	0	0	0	0	0	0	0	0	0	0	0	0	0	0	-9.89652	-10.2229	0	-12.9457	0	0	-32.4651	0	0	0	0	0	-10.2574	0	0	0	0	-11.6449	0	0	0	0	-14.0644	0	0	0	-14.387	0	-23.6088
HERVH_7q31.33b	0	0	0	0	0.111705	0	0	0	0	0	0	0	0	0.0370219	0	0	0	0.0838792	0.0176701	0.0448711	0	0	0	0	0	0.269007	0	0	0	2.39058	0	0	0	0	3.88808	0.0185453	0	0	0	0	0	0	0	0	0.0637989	0.0114201	0	0	0
HERVH_7q31.33c	0	0	-9.19865	-19.9977	-5.15925	0	0	-12.2055	0	0	-11.8482	0	-25.5313	0	0	-18.5791	-26.48	0	0	0	0	0	-14.2154	-14.2425	-14.6006	0	-22.6636	-11.8195	-8.20508	-11.7618	-11.1236	-16.4916	0	0	-17.8027	0	0	-20.0799	0	0	0	-13.3088	0	0	0	0	-25.7668	-16.6115	0
HERVH_8p11.23	-4.3897	10.3549	0	-37.6182	0	0	0	-20.1828	20.596	-3.02932	0	-18.2552	-48.3601	0	0	-28.4095	-46.6152	22.4217	-9.97552	9.47261	0	0	-49.5495	-24.2024	-17.4763	12.0489	0	-48.1623	-22.322	-30.0423	0	-43.3831	-20.8642	0	-39.2333	-8.13264	0	-31.4594	9.63375	13.2465	-15.6711	-32.3935	0	0	19.1224	23.1182	-60.1921	-41.0854	0
HERVH_8p23.1c	0	0	-12.1641	-16.5816	0	0	-16.4868	-19.3207	9.00383	-1.59418	-17.0019	-7.27546	-18.169	10.2346	-16.6751	-9.6333	-40.2905	12.4983	-4.69882	3.60147	0	-31.271	-26.0563	-23.3657	-17.8546	0	-36.3283	-22.4133	-8.6706	-21.4682	-10.8768	-21.1229	-28.5223	0	-32.6689	-4.01736	-14.5249	-26.882	3.50877	0	0	-27.5892	-34.3262	-22.3924	0	8.38773	-34.0552	-36.3624	-31.794
HERVH_8p23.1d	0	0	-3.49854	-8.27522	0	0	-6.52491	0	0	0	0	0	0	0	0	0	0	0	0	0	0.21744	0	0	0	0	0	0	0	0	0	0	0	0	0	0	0	0	-4.45717	0	0	0	0	0	0	0	0	0	0	0
HERVH_8p23.1h	0	0	-10.0984	-18.7814	0	0	-16.071	-14.3403	0	0	-11.2462	0	-16.6305	0	-9.9976	-9.97368	-20.3671	0	0	4.76397	0	-11.91	-16.1034	-9.96033	-13.8468	1.20129	-15.7376	-13.4604	-8.59604	-13.3032	-11.2621	-13.3583	-10.4921	0	-24.827	0.414725	0	-16.4289	0	0	-6.26853	-9.41157	-16.661	-6.85639	7.70375	8.18152	-21.7571	-19.9245	-15.7407
HERVH_8p23.1i	0	2.97831	0	-4.63891	0	6.77195	-6.44795	0	7.67723	0	0	0	0	0	0	0	0	2.59521	0	0	0	0	0	0	0	0.866535	0	0	0	0	0	0	0	0	0	0	0	0	0	0	0	0	0	0	1.68509	0	0	0	0
HERVH_8q22.1a	-6.92646	28.0913	-26.1754	-69.0278	-14.4212	12.7056	-39.5227	-59.8982	32.0489	-5.80047	-42.305	-39.3485	-89.7248	32.2762	-28.0591	-62.7447	-130.234	19.971	-10.0866	18.5228	-12.9999	-69.9667	-95.5227	-67.9694	-65.1553	10.5818	-103.81	-86.4231	-42.1339	-75.7419	-32.1598	-78.5624	-63.6837	-6.35077	-91.8632	-5.55914	-41.807	-79.9262	12.4725	16.425	-31.4236	-79.1535	-71.521	-44.5621	45.053	30.5059	-136.063	-104.62	-89.1435
HERVH_8q23.3d	0	0	0	-17.2793	0	0	0	0	0	-2.25785	0	0	-25.823	0	0	-23.4422	0	0	-6.12622	0	0	0	-21.33	0	0	5.7074	0	-16.5188	0	0	0	-15.6485	0	0	0	-4.54444	0	-16.0485	0	11.0053	0	0	0	0	0	12.122	0	-20.7565	0
HERVH_8q24.21a	0	0	0	-2.7643	0	0	0	0	0	0	0	0	0	-1.03951	0	0	-5.70569	0	0	0	-1.75297	-3.42924	-2.90385	0	-3.74004	0.598874	-7.20698	-2.14936	-3.51935	0	0	0	-2.60681	0	0	0	0	0	0	0	0	0	-4.2864	0	0	0	-6.95493	0	-6.87348
HERVH_8q24.21b	0	5.65116	0	-15.4531	0	0	0	-18.9049	0	-4.97829	-17.1574	0	-19.5072	0	-13.4055	-12.4275	0	0	0	0	9.28765	0	-17.3094	-17.9519	0	0	0	-16.8015	0	0	0	-14.1676	0	0	0	0	0	-27.0068	0	0	0	0	0	0	16.0753	11.5569	0	0	0
HERVH_8q24.22a	0	0	0	-18.4609	0	0	0	0	0	0	0	-16.972	-19.6497	0	0	-21.8782	-34.3947	6.22567	0	0	0	-20.2345	-37.061	0	0	0	0	-31.2887	-13.8226	-18.9061	-11.3921	-23.1642	-14.6836	0	0	0	0	-20.4742	4.3755	8.13912	0	-23.5832	-18.0915	0	0	12.3049	-31.8786	-19.3882	0
HERVH_8q24.23c	-4.26443	20.45	-19.7989	-52.9249	-11.7453	16.4034	0	-43.7024	26.168	-4.54114	-29.3904	-39.437	-69.3094	0	-24.3364	-44.6854	-93.3989	22.687	-8.8342	0	-14.1659	-60.6994	-84.3006	-52.5948	-47.6325	11.7771	-81.3405	-73.8191	-31.6294	-62.2736	-26.6047	-71.5804	-46.2759	-6.0668	-62.3173	-6.85077	-31.3838	-72.2401	7.23211	13.9033	-25.7051	-70.6412	-64.0594	-34.3492	33.3973	27.1085	-107.432	-77.3776	-70.9134
HERVH_9p13.3a	-1.08394	0	0	-5.23805	-1.20334	0	-6.18663	-5.3071	0	0	-6.2387	-2.39805	-7.4093	0	-5.43526	-4.03507	-5.48828	0	0	0	0	0	-5.44229	0	0	0	0	-4.38445	-4.12814	-6.18235	-4.63721	-5.86469	0	-1.09357	-8.38562	0	0	-4.85221	0	0	-3.04605	0	0	0	0	2.81695	-6.4194	-6.79159	0
HERVH_9p13.3c	-4.91637	18.5958	0	-32.6803	-7.54717	0	0	-19.0811	24.1615	-4.16993	0	-11.7503	-34.5865	18.7347	0	-24.1482	0	17.8716	-5.91671	11.2353	18.8718	0	-29.1215	-19.4309	0	12.0838	0	-29.8115	-25.01	-24.5422	0	-34.9322	0	0	-29.7263	-7.91631	0	-30.5272	8.64211	13.9858	0	0	0	0	25.7132	22.7689	-25.8527	-28.8113	0
HERVH_9p21.3a	-1.65309	0	0	0	-3.94869	0	0	0	0	-1.45018	0	0	-9.86922	0	0	0	0	0	0	0	0	0	0	0	-10.0335	0	0	0	0	0	0	0	0	-1.49334	0	0	0	-9.66322	0	0	0	0	0	0	0	0	0	0	0
HERVH_9p24.2a	0	0	0	-29.3531	0	0	0	-19.3988	0	0	-15.0231	-15.9926	-33.242	0	0	-26.9503	-42.1923	0	-6.78382	0	0	-23.8713	-41.586	-19.3783	-18.1327	0	-34.2518	-31.3769	-21.8481	-24.4404	-13.5245	-28.6532	-20.4196	0	-25.2703	0	0	-30.159	0	0	0	-30.2743	-27.1039	0	20.3692	15.6709	-44.1878	-31.4713	-26.4628
HERVH_9q21.13b	0	0	0	0	0	0	0	0	0	0	0	0	0	0	0	0	0	-0.0399613	0	0	0	0	0	0	0	0	0	0	0	0	0	0	0	0	0	0	0	0	0	0	0	0	0	0	0	0	0	0	0
HERVH_9q21.33c	-6.26962	14.1169	-23.5531	-58.9169	-10.6362	9.4765	-39.2911	-50.0304	21.785	-3.19606	-39.0325	-22.6933	-72.2006	21.9494	-28.9226	-54.3052	-104.222	21.3444	-12.1675	14.8591	0	-55.3887	-74.4721	-49.4254	-54.6615	9.90987	-75.8824	-63.2019	-26.9686	-52.126	-34.6905	-54.612	-47.6258	-5.08443	-79.1769	-8.45226	-37.379	-61.1939	8.10513	10.7811	-28.2009	-55.0672	-57.3584	-32.9657	25.6194	26.6309	-99.5397	-85.2797	-68.0451
HERVH_9q22.32	-0.155282	0	0	0	0	0	0	0	0	0	0	0	-3.1924	0	0	-1.99095	0	0	0	0	0	0	0	0	-1.93902	0	0	0	0	0	0	-1.62334	0	0	0	0	0	-1.86283	0	0	0	0	0	0	0	0	-1.80641	-2.3562	0
HERVH_9q22.33b	0	0	0	-28.158	0	0	0	-20.6926	0	0	0	-21.5481	-34.0322	0	0	-27.733	-36.2012	0	-8.12696	0	0	-21.6867	-42.8511	-22.274	-21.1468	4.9508	-33.577	-34.6672	-19.1064	-27.3638	-17.6725	-30.2642	-15.8612	-1.83735	-29.606	0	0	-32.5306	0	0	-15.1194	-32.7689	-26.8549	0	14.1233	17.1362	-44.5751	-36.5858	0
HERVH_9q31.1	-1.36436	0	-4.63181	-7.98062	0	0	-7.28587	-6.05402	2.88514	0	-4.31543	-2.95252	-9.61636	0	0	-5.37918	-7.21717	0	0	0	0	0	-6.85882	-3.65307	-8.3161	0	-5.21302	-5.60526	-6.4256	-6.13182	-6.44841	-5.89502	0	-1.39101	-6.49098	0	-4.16985	-6.14973	0	0	-6.70735	-5.77147	0	0	5.78517	4.87155	-10.0639	-8.74682	-4.16514
HERVH_9q33.2a	0	-1.03627	-4.64886	-9.01377	0	-2.96926	0	-3.41919	0	0	0	0	0	0	-4.42487	-4.61972	0	5.56485	0	1.51788	0	0	-5.24847	0	-3.67584	0	0	-3.99237	-4.24554	-4.72066	-6.54856	-4.4397	0	0	0	0	0	-3.72119	0	0	0	0	0	0	5.05374	7.96149	0	0	0
HERVH_9q34.13	-4.50401	12.4435	-18.6431	-49.0946	0	0	-27.9032	-38.6883	18.3969	-2.77677	-26.6147	-18.4727	-53.4421	19.0335	-23.783	-43.7567	-69.0349	12.174	0	0	0	-29.6012	-54.3227	-37.9981	-41.8291	9.38433	-50.5084	-48.606	-26.2118	-38.7042	-25.7187	-43.7257	-33.3439	0	-58.6724	0	-22.8993	-55.4948	6.49442	0	-24.8736	-37.9664	-32.7659	-22.7325	25.2175	24.1891	-72.0636	-61.8952	-38.3696
HERVH_Xp11.21	0	-1.50863	0	-3.84662	0	0	-3.99943	0	0	0	0	0	0	0	0	0	0	0	0	1.88965	0	0	0	0	0	0	0	-3.0398	-3.11087	-5.65647	0	0	0	0	0	0	0	0	0	0	0	0	0	0	4.98751	3.02851	-6.10524	0	0
HERVH_Xq21.33a	0	0	0	-14.0135	0	0	0	0	0	0	0	-11.339	-17.0339	0	0	-15.0324	0	0	0	0	0	0	-21.6281	0	0	0	0	-20.8725	-10.4527	-14.4776	0	-18.0872	0	0	0	0	0	0	0	5.44872	0	-16.7828	0	0	0	6.44042	0	0	0
HERVH_Xq22.2a	0	0	0	-32.5403	0	0	0	-16.7861	11.943	-1.13902	0	-13.3107	-35.0007	0	0	-32.365	-49.0903	0	-4.69959	0	-9.13381	-25.0618	-38.6445	-16.6222	-21.3148	5.14002	-38.5098	-36.1244	-17.5049	-24.9762	-13.3706	-27.9046	-18.9369	0	-30.0672	0	0	-23.9509	0	0	-15.8696	-20.3406	-23.749	0	18.9702	18.4087	-53.1096	-31.2791	-32.5026
HERVH_Xq22.2b	0	0	0	0	-7.94125	8.64964	0	-13.088	10.556	0	0	0	-17.0842	9.88832	0	-13.7818	-30.7917	0	-10.9205	8.3332	0	-19.2231	-17.7801	-16.8795	-15.2574	8.35044	-27.1943	-13.4652	0	0	0	-18.3716	-18.6959	-3.48632	-20.5895	-6.21795	-11.5961	-19.4223	5.29017	11.365	0	-19.6518	-21.408	-13.3038	19.5688	17.258	-24.8815	-28.8476	-27.1081
HERVH48_1p22.3	-2.3509	6.48633	-10.7222	-21.3068	-5.259	11.7765	-24.6059	-26.7297	15.4936	-1.33724	-23.414	0	-29.9878	15.7146	-12.5066	-13.5265	-44.675	16.6095	0	8.55395	0	-29.6257	-23.2427	-30.1829	-27.1399	7.16849	-41.5202	-18.1103	-8.34528	-23.2855	-15.9937	-25.4243	-27.259	-2.14127	-44.3313	0	-14.7411	-30.7724	0	11.2677	-10.9297	-24.902	-27.6777	-21.6818	11.1932	16.9785	-38.6248	-46.7537	-34.664
HERVH48_4p15.31	0	0	0	0	0	0	0	0	0	0	0	-4.53192	0	0	0	0	0	0	0	0	0	6.08613	0	0	0	3.29218	0	0	0	0	0	-8.57036	4.05449	0	0	0	4.82375	0	0	0	3.95303	0	0	7.45018	0	0	0	0	5.80628
HERVH48_7q22.1	0	0	-9.58836	-19.597	0	0	0	-12.5186	0	-1.31576	0	0	-16.2914	0	-14.4144	-9.11461	0	0	0	6.88237	10.0866	0	0	-14.1999	0	0	0	-12.5243	-10.4327	0	0	0	0	0	0	0	0	-21.9148	0	0	0	0	0	0	0	11.469	0	0	0
HERVH48_8q12.3	0	-1.06385	0	0	0	0	0	0	0	0	0	0	0	0	0	0	0	0	0	0	0	0	0	0	0	0	0	0	0	0	0	0	0	0	0	0	0	0	0	0	0	0	0	0	0	0	0	0	0
HERVH48_8q21.2	-4.63838	8.75101	-22.9093	-41.5238	0	9.38808	-32.9657	-47.3245	11.9423	-3.48039	-39.65	-14.7493	-62.4324	14.2298	-21.942	-28.2979	-96.9363	17.9145	-9.35059	10.6755	-14.141	-56.1384	-57.9893	-50.1181	-54.626	12.3321	-86.0085	-45.2442	-22.0325	-44.448	-28.9024	-49.4461	-47.3651	-3.54563	-71.2519	0	-29.6918	-64.4579	5.38925	20.6649	-24.7431	-52.36	-60.0464	-30.658	20.2854	21.131	-96.5029	-79.646	-82.5829
HERVH48_8q24.13	-3.75231	12.5777	-20.7625	-37.5979	-7.04128	0	-27.1464	-38.5063	19.5255	0	-31.9812	-10.378	-52.5895	18.6531	-22.0782	-30.9666	-77.0313	11.6793	-5.53151	12.2541	0	-44.8312	-46.3653	-36.9179	-43.8856	5.64951	-61.716	-38.9083	-18.4532	-39.0236	-28.4867	-40.9779	-36.7624	0	-61.3375	0	-20.0111	-47.1666	4.94761	11.1725	-14.2401	-36.0244	-39.8687	-28.2193	23.2781	20.6047	-73.1767	-65.1265	-56.7395
HERVI_16p13.13	-4.75908	8.90268	-26.4154	-51.5667	-10.419	7.53379	-31.9216	-51.0887	0	-3.09168	-36.8606	-24.1774	-71.4767	0	-19.3878	-46.3322	-92.1481	14.8549	-10.9604	0	0	-52.9639	-71.7209	-47.5856	-54.1245	7.56177	-72.6664	-55.7493	-28.4182	-51.8261	-34.3333	-56.1993	-46.6768	-3.81026	-69.1811	-7.45789	-34.5854	-61.7553	0	17.8237	-27.6682	-57.4912	-49.3213	-29.2854	28.0717	24.2464	-89.4647	-82.2061	-60.3116
HERVI_16q22.2	0	0	0	0	0	0	0	0	4.10665	0	0	0	0	0	0	0	0	0	0	6.2494	0	-6.3784	0	0	-7.70071	0	0	0	0	-5.83037	0	-8.06438	0	0	0	0	0	-8.15483	0	0	0	0	0	0	12.9452	14.7763	-9.80654	0	0
HERVI_7q33a	0	1.65022	0	3.41802	0	0	0	0	7.39133	0	0	0	0	8.90943	0	0	0	3.66351	0	-4.48119	0	0	0	0	0	1.33174	0	0	0	0	0	0	0	0	0	0	0	0	0	0	0	0	0	0	0	0	0	0	0
HERVI_7q33b	0	0	0	0	0	0	0	0	0	0	0	0	0	0	0	0	0	0	0	-7.00196	0	0	0	0	0	0	0	0	0	0	0	0	0	-0.155158	0	0	0	0	0	0	0	0	0	0	0	-0.971442	0	0	0
HERVI_7q33c	0	7.92826	0	0	0	0	0	0	12.7745	-0.648842	0	0	0	18.0014	0	0	0	7.98172	0	0	3.80262	0	0	-8.52517	0	2.04114	0	0	0	0	0	-8.30183	0	0	0	0	0	0	3.24868	0	-8.61267	0	0	0	6.29573	0	0	0	0
HERVI_9q22.1	0	4.52742	0	0	0	6.5204	0	0	0	-3.07617	0	0	0	0	-11.911	0	0	0	0	8.51021	0	0	0	0	0	1.60057	0	0	0	0	0	0	0	0	0	0	0	-21.8033	0	0	0	0	0	0	13.7483	12.1846	0	0	0
HERVIP10F_13q34	0	0	0	0	0	0	0	0	0	0	0	0	0	0	0	0	0	0	0	2.1145	0	0	0	0	0	0	0	0	0	0	0	0	0	0	0	0	0	0	0	1.25246	0	0	0	0	3.61239	0	0	0	0
HERVIP10F_14q11.2c	-4.58384	19.7692	-18.8381	-41.3669	-11.2007	0	-29.941	-41.8022	0	-7.5059	-31.8159	-21.4009	-55.7158	0	0	-35.988	-69.2045	0	-14.0213	11.4756	-11.458	-43.2037	-57.675	-42.9269	-47.3164	11.0471	-66.2767	-50.4486	-25.9083	-47.0487	-25.7603	-55.3836	-39.02	-6.23421	-62.2487	-9.54393	-29.084	-56.2661	12.063	11.9742	-25.458	-47.1607	-48.1183	-26.4135	25.3947	28.5634	-82.4864	-63.8837	-62.7778
HERVIP10F_16p13.13	-4.74821	0	-25.003	-45.9664	-8.50059	13.1493	-33.0526	-43.8993	0	-2.41208	-34.0619	-18.0549	-61.976	0	-25.2944	-40.482	-84.1728	13.2708	-12.0102	0	-9.85803	-45.037	-61.2889	-42.5943	-46.892	6.69655	-72.6684	-50.1578	-24.8731	-43.4193	-29.3257	-48.7378	-40.9993	-3.65246	-64.8251	-9.19129	-28.6576	-55.9602	0	0	-26.4805	-50.3068	-49.1224	-29.3784	26.8188	23.5321	-83.2979	-67.704	-60.3973
HERVIP10F_19p13.2b	-4.86745	34.0131	-19.6359	-50.9917	-14.8447	25.0822	-29.9507	-51.068	35.4639	-7.88328	-36.7873	-41.5221	-81.9541	39.5523	0	-52.0804	-115.561	27.1307	-8.50744	15.0745	-14.4737	-66.5603	-90.1213	-70.4565	-57.6828	13.1085	-108.882	-77.8222	-30.6044	-70.7247	-22.3551	-78.2168	-57.0463	-7.42653	-77.1238	0	-31.0722	-80.412	9.19509	14.7399	-34.805	-80.5475	-72.4566	-42.2526	35.9963	30.7456	-126.699	-86.1921	-91.2428
HERVIP10F_19q13.41a	-2.56682	3.42945	-10.5572	-22.1805	-4.65359	0	-21.5376	-31.0019	9.66476	-2.50622	-24.5815	-11.8292	-40.2941	0	-27.9828	-14.9288	-39.5676	0	-3.60541	0	0	-16.0628	-21.8474	-35.0863	-24.9881	0	-27.5313	-23.0148	-11.728	-26.1809	-12.3263	-27.6044	-19.9315	-3.09913	-42.7056	0	-16.0427	-32.7081	1.87235	0	-15.3976	-29.2082	0	-19.2339	15.0833	11.6086	-49.5988	-48.1408	-23.6954
HERVIP10F_1p35.2a	0	0	0	0	0	0	0	0	0	0	0	0	0	0	0	0	0	0	-4.43544	0	3.42619	0	0	0	0	0	0	0	0	0	0	-11.1767	0	0	0	0	0	0	0	0	0	0	0	0	0	0	0	0	0
HERVIP10F_1p35.2b	0	0	0	0	-7.81765	0	0	-15.4307	0	0	0	0	-26.2736	0	0	-12.4046	-26.3253	0	0	0	0	0	-16.9301	-13.5861	-14.0383	0	0	-11.4599	-9.87932	-13.6974	0	-25.2169	0	0	-22.6458	0	0	-17.6159	0	0	0	0	0	0	0	0	-21.9257	-19.4374	0
HERVIP10F_1p35.2c	0	0	0	0	0	0	0	0	0	0	0	-6.56134	-12.6819	0	0	0	0	0	0	0	0	0	0	0	0	4.61961	0	0	0	0	0	-15.5271	0	0	0	0	0	0	0	0	0	0	0	0	0	0	0	0	0
HERVIP10F_1p36.33	-2.28191	0	0	-6.84273	-2.8537	0	0	0	0	0	-6.22886	0	-12.7352	0	0	-5.38122	-10.324	2.65387	0	0	0	0	0	-8.13508	-7.24918	0	-7.15349	0	0	0	0	-10.7558	0	-1.9034	-11.0397	0	0	0	0	0	0	0	0	0	0	0	-12.3856	-8.18509	-8.00297
HERVIP10F_1q25.1	0	0	0	0	0	0	0	3.85907	0	0	0	0	0	0	4.63835	0	0	0	0	0	0	0	0	0	4.04102	0	0	0	0	0	0	0	0	0	0	0	0	0	0	0	0	0	0	0	0	0	0	0	0
HERVIP10F_1q44	-1.82094	3.74199	0	-11.5267	-2.1065	-3.70528	-14.6861	-12.3428	0	0	-11.7438	-5.74221	-16.6401	0	-8.34794	-9.65913	-24.578	0	0	2.0338	-11.3089	-17.9603	-13.557	-16.7774	-20.1625	0	-34.161	-11.7114	-5.92109	-17.6329	-10.8147	-19.0824	-13.3938	-1.60096	-25.3434	0	0	-12.9085	0	5.12239	-12.0611	-8.53859	-16.7881	-8.00282	0	7.67522	-33.3698	-21.3673	-28.5268
HERVIP10F_22q13.2	-6.74982	17.2985	-23.1595	-41.8779	-9.26344	10.7211	-27.1835	-40.3816	23.5648	-3.65887	-31.0757	-9.23074	-58.8678	22.0875	-24.1836	-34.9894	-74.01	22.8638	-6.18644	14.3786	0	-34.9389	-49.5978	-34.4035	-45.342	7.81839	-53.7759	-45.2414	-23.6086	-44.7268	-25.2163	-42.8091	-36.6215	-4.52557	-71.6174	0	-21.7493	-44.9659	10.4276	10.7845	0	-33.3044	-34.4572	-26.1937	28.7692	24.8135	-73.4924	-67.5205	-49.173
HERVIP10F_2p12	-3.57377	0	-12.1295	-33.0949	-10.6342	0	-16.6254	-24.479	0	-2.71897	-15.6448	-14.8579	-40.5592	0	0	-26.8612	-43.5142	0	-7.4873	8.31829	0	-21.5699	-38.4891	-22.6166	-23.3363	0	-24.103	-33.6103	-18.8048	-27.1245	-16.527	-34.8829	-12.9736	-3.34726	-42.1825	0	-14.7574	-29.8434	0	0	-14.0061	-26.4436	-22.696	0	14.7802	17.3598	-47.8113	-38.5059	-20.9327
HERVIP10F_2q21.2	0	2.71595	0	0	0	2.48355	0	0	5.44375	-0.68208	0	0	0	6.50204	0	0	0	0	0	0	-5.15115	0	0	-8.22863	-6.76635	1.80732	-18.6666	0	0	0	0	0	0	0	0	0	0	-8.16265	0	0	0	0	-11.894	0	0	0	-10.7385	0	-18.2888
HERVIP10F_2q23.3	0	0	0	0	0	0	-4.89043	-2.99192	-0.25532	0	-3.70191	0	-5.13211	-1.08836	0	0	-4.7192	0	0	0.638407	0	0	0	-4.16288	-3.96857	0	-6.16339	0	-2.18607	0	0	0	-2.32207	0	-6.69091	0	0	-3.03256	0.112168	0	-2.91889	0	0	0	2.87863	2.52513	-7.35427	-6.30995	-6.06748
HERVIP10F_2q34	0	0	-12.3854	-41.5691	0	0	0	-28.3399	20.7296	-1.9514	-19.9386	-22.7987	-49.3884	22.4477	0	-37.4515	-56.629	16.5435	-10.3838	0	0	-33.2539	-55.1682	-29.8949	-28.1551	9.20578	-45.764	-47.1782	-23.2802	-36.6893	-20.2451	-49.2408	-24.4419	0	-45.8746	-3.93113	-21.1155	-39.8522	0	12.6547	-16.2361	-40.0872	-30.5495	0	19.0099	18.8729	-65.8853	-49.0607	-35.834
HERVIP10F_3p25.3	0	9.36709	0	0	0	4.029	0	0	17.1219	-2.67348	0	0	-27.963	26.1283	-18.0766	0	-37.7442	9.11668	-4.05631	6.72424	0	-21.9735	-26.7553	-31.7994	0	0	-43.1756	-29.9528	0	-27.2783	0	-26.8113	-24.4546	0	-30.9318	0	0	-39.6674	4.5312	0	0	-32.4945	-20.3877	-18.8915	18.87	13.629	-48.4341	-36.3943	-34.904
HERVIP10F_3p26.1	0	0	0	0	-8.69483	0	0	0	0	-2.19546	0	0	0	0	0	0	0	0	0	5.43031	12.2892	21.7085	0	0	0	4.15675	32.0521	0	0	0	0	0	13.7848	0	0	0	11.1175	0	0	0	0	0	18.752	10.9091	0	8.50348	20.632	0	37.8937
HERVIP10F_7p13	-2.75688	13.3699	0	-22.22	-8.13271	0	0	-23.2304	11.7828	0	0	-18.5282	-41.8051	0	0	-24.562	-44.8863	0	-7.98186	8.36395	0	-25.2916	-40.0505	-25.5735	-24.6749	11.0024	-31.4935	-37.6378	-15.1097	-31.9014	0	-41.875	-20.8247	-2.07883	-36.3549	-8.30521	0	-33.1615	8.62835	13.0282	-16.0208	-33.4053	-20.2623	0	15.8022	20.4513	-48.2198	-38.0455	-27.2386
HERVIP10F_7p14.1	-1.42754	0	0	0	-2.64279	0	0	-6.41877	1.27468	0	-5.99507	0	-9.99593	0	0	0	-7.70837	0	0	0	0	0	0	-7.18915	-7.70737	0	-6.90471	0	0	-7.22827	-4.08261	-7.40783	0	-1.27432	-11.9084	0	0	-5.48474	0	0	-4.79139	0	0	0	0	0	-11.1641	-10.4998	-6.8147
HERVIP10F_8p11.22	0	18.9509	0	-20.5206	-9.66679	16.4292	0	-23.4025	18.4272	0	-23.588	-30.5972	-51.921	14.3456	0	-21.0271	-67.0999	18.4951	0	0	-7.31204	-44.4246	-51.7255	-45.9554	-19.509	12.1724	-61.1695	-44.1659	-14.2506	-43.0433	0	-49.6628	-34.027	0	-42.8397	0	-20.8015	-53.3216	8.05997	12.9523	0	-62.9132	-43.9931	-28.285	16.8887	12.9565	-72.3785	-45.5939	-51.7701
HERVIP10F_8p22	0	0	0	0	0	0	0	-2.13876	0	0	-2.17638	0	0	0	0	0	0	0	0	0	-1.87718	-3.14768	0	0	0	0	-4.6144	0	0	0	-0.877868	0	-2.54091	0	0	0	0	-2.66315	0	0	0	-2.71547	-3.16963	-2.43528	0	0	0	-3.13548	-4.60834
HERVIP10F_9p11.2	3.19019e-06	0	-0.688173	-0.181439	0.000648785	0.000754968	-0.838378	-0.294698	0	-0.000376287	-0.471537	0.0103231	-0.158828	0	-0.194645	-0.0438171	-0.274341	0	0	0	-0.00165742	-0.059637	-0.0329467	-0.154965	-0.045211	0.000392681	-0.0596126	-0.0312123	-0.13425	-0.143556	-0.0974327	-0.111182	-0.281236	-0.000214122	-1.86442	0.000247699	-0.167963	-0.0561178	9.50967e-05	-0.0484652	0.00367197	-0.0277949	-0.283385	-0.220889	0	0	-0.11012	-0.270953	-0.0392995
HERVIP10FH_10p11.23	0	0	-15.4267	-26.0233	0	0	-26.1082	-23.7162	10.9571	0	-21.2166	-9.49512	-28.3604	13.1395	-22.3775	-17.5744	-52.8136	8.6348	-8.1987	9.6463	-12.4184	-32.2923	-29.4788	-24.3567	-30.8966	0	-49.5602	-24.2846	-12.7329	-27.868	-20.2313	-29.5753	-27.6761	-2.36811	-38.4897	-4.14519	-16.0247	-28.929	0	0	-14.8489	-22.7609	-32.7734	-19.9729	18.0134	17.249	-49.244	-36.8077	-43.0317
HERVIP10FH_10q23.33	-3.16119	0	0	0	-7.65714	0	0	0	0	-2.62117	0	0	0	0	0	0	0	0	-6.28329	4.32972	4.43374	0	0	0	0	4.53391	0	0	0	0	0	-12.7089	0	0	0	-2.97134	0	0	0	8.15952	0	0	0	0	0	7.04802	0	0	0
HERVIP10FH_11p15.5	-5.02875	23.8691	-18.2878	-48.5251	-10.9271	20.8176	0	-41.8782	30.975	-3.24089	-28.116	-38.7932	-69.9458	31.2541	0	-45.8517	-93.1009	26.7743	-14.742	0	0	-63.5545	-85.0493	-53.7585	-42.3811	16.8269	-81.1812	-70.8935	-32.0959	-58.583	-20.1026	-72.2473	-51.5463	0	-60.8921	-10.4324	-28.4994	-71.7873	13.8401	24.6892	-24.3636	-72.6364	-60.4327	-30.5943	27.7363	27.2418	-107.76	-76.8261	-67.5311
HERVIP10FH_14q11.2	0	0	0	0	0	0	0	0	0	0	0	0	-3.11949	0	0	0	0	0	0	0	0	0	0	-5.41887	-3.38987	0	-6.0978	0	0	-4.158	0	0	0	0	-5.32844	0	0	-5.53373	0	0	0	-3.27077	0	0	0	0	-6.84955	-4.48163	-5.69399
HERVIP10FH_14q12	-1.20202	0	0	0	0	0	0	0	0	-0.550305	0	0	0	-3.09169	0	0	0	0	-0.871979	0	0	0	0	0	0	0	0	0	0	0	0	0	0	-1.10196	0	-1.89585	0	0	0	0	0	0	0	0	0	0	0	0	0
HERVIP10FH_15q13.3	-4.26659	0	0	-21.5751	-4.85275	0	0	0	0	-2.0681	0	-12.786	-26.9993	0	0	-23.0967	0	0	-6.56581	6.88751	8.6377	0	-20.7027	0	0	6.47607	15.3039	-22.4172	-17.8375	0	0	-20.4552	0	0	0	-2.43169	0	0	0	10.3719	0	0	0	9.89187	0	12.5478	0	0	0
HERVIP10FH_15q25.1	-3.08765	11.5069	-13.8651	-29.8606	-7.97526	6.09077	-24.2654	-31.9135	24.7364	-1.56858	-28.6712	-10.3622	-40.2361	27.2323	-14.7291	-21.9639	-69.2876	17.3184	0	13.0261	-9.09236	-38.961	-35.0755	-31.8647	-35.6581	0	-56.4784	-28.2678	-12.9328	-35.9271	-21.2852	-34.961	-31.5662	-3.29456	-58.3346	0	-19.5876	-36.1276	5.03785	10.8695	-12.4897	-28.7203	-35.8575	-22.9357	25.3549	21.5296	-61.7882	-54.7947	-51.4409
HERVIP10FH_17q21.32	-1.49431	0	0	0	0	0	0	0	0	0	0	0	-9.56119	0	0	0	-10.1007	3.45026	0	0	0	0	0	0	-9.2924	0	-8.60208	-5.36772	0	-10.9406	0	-11.3481	0	-1.10179	-14.2652	-2.08898	0	0	0	5.67477	0	0	0	0	0	0	-15.2542	-11.0224	-9.2557
HERVIP10FH_1p33a	0	0	0	-16.5817	-1.87628	0	0	-13.9732	0	-0.806342	-11.8554	0	-17.2431	8.8841	0	-12.8743	-31.101	0	0	7.24792	-5.78832	-15.223	-17.306	-10.4465	-17.7317	5.45165	-25.3725	-12.8135	-8.5998	-12.5397	-10.5381	-16.7175	-11.4879	-1.62373	-20.9353	0	0	-16.0754	0	8.09476	0	0	-16.2426	0	10.9416	12.8894	-25.693	-20.852	-25.0722
HERVIP10FH_2p14	0	0	0	-15.024	0	0	0	-22.9542	10.2646	0	-17.4535	-13.468	-28.5209	11.8437	-18.2127	-17.7866	-42.1617	0	-8.22833	7.75045	-11.9232	-31.1141	-23.4611	-26.4749	-22.8855	0	-50.0315	-22.8108	-13.7808	-31.2143	-13.9494	-27.0164	-23.7618	-2.87764	-41.6146	-5.58097	-13.4637	-26.8333	0	0	-13.5301	-21.9251	-25.8937	-17.8808	17.5188	14.1408	-46.9288	-33.3573	-38.8199
HERVIP10FH_2q14.2	0	0	0	0	0	3.11006	0	0	0	0	0	0	0	0	0	0	0	0	-6.12772	0	0	0	0	0	0	0	0	-14.796	0	0	0	0	0	0	0	-5.42156	0	-19.2062	0.431067	0	0	0	0	0	0	13.5017	0	0	0
HERVIP10FH_3p26.1a	0	0	0	0	0	0	0	-6.24745	0	0	0	0	-5.33754	0	0	0	0	0	0	0	0	0	0	-5.6468	0	0	0	0	0	0	0	-4.66703	0	0	-10.0362	0	0	-7.59609	0	0	0	0	0	0	0	0	0	0	0
HERVIP10FH_3q13.33	0	5.18636	0	-9.66178	0	5.75426	0	-13.1346	10.5037	0	-15.7906	-7.4637	-13.9632	9.92825	-8.18068	-10.7222	-20.7588	3.66169	0	0	3.12508	-12.514	-18.8614	-19.3455	-12.7136	0	-11.7845	-13.1228	0	-15.4069	-6.59129	-11.0793	-11.022	0	0	0	-8.44643	-21.0427	0	0	-6.85277	-17.8227	-11.7604	-13.1358	0	0	-20.2157	-17.2426	0
HERVIP10FH_4p13	0	0	0	-4.68243	0	0	-6.81606	0	0	0	0	0	0	0	0	0	0	0	0	0	0	0	0	0	0	0	0	0	0	0	0	0	0	0	0	0	0	0	0	0	-2.00373	0	0	0	0	0	0	0	0
HERVIP10FH_5q23.1a	0	0	0	0	0	0	0	-7.01262	0	0	0	0	-11.2438	0	-5.66793	-9.47319	-10.1966	0	0	0	0	0	-12.0583	0	-6.22157	0	0	-10.4436	0	-8.36032	-5.51818	-8.09416	0	0	-10.1542	0	0	-7.88533	0	0	0	-7.41777	0	0	14.4092	4.13135	-11.7828	-9.49517	0
HERVIP10FH_5q32	0	0	0	-10.7758	0	0	0	-6.63513	0	-0.877436	0	0	0	0	0	0	-9.68593	0	0	0	-2.6882	0	-7.54506	0	-6.25819	0.218034	0	-7.31137	-5.97821	-6.70176	-7.66682	-7.79615	0	0	-8.3033	0	0	-6.62119	0	0	0	0	0	0	0	0	-10.8559	0	0
HERVIP10FH_6q22.1	-2.87998	24.3258	-23.9709	-50.8933	0	26.7768	-32.5917	-52.7149	40.1439	-3.22524	-39.6082	-25.2427	-69.191	38.4666	-24.7979	-48.2109	-110.888	23.0185	-9.44426	14.2083	-14.1927	-65.739	-74.4012	-56.9065	-58.8341	12.7947	-93.0632	-62.225	-25.2827	-55.3031	-31.6744	-60.5412	-57.1521	0	-74.5775	0	-34.7447	-72.441	8.28395	18.941	-28.4418	-64.7196	-65.7156	-38.2247	33.7434	25.9749	-110.908	-89.6916	-83.8705
HERVIP10FH_6q25.3	0	0	0	-5.08111	0	0	-5.88418	0	0	0	0	0	0	0	0	0	0	0	0	0	0	0	0	0	0	0	0	0	0	0	0	0	0	0	0	0.031974	0	0	0	0	0	0	0	0	0	0	0	0	0
HERVIP10FH_8q21.3	0	0	0	0	0	0	0	0	-4.57915	-0.108037	0	0	0	0	0	0	0	0	0	0	0	0	0	-6.73804	0	0	0	0	0	0	0	0	0	0	0	0	0	0	0	0	0	0	0	0	0	0	0	0	0
HERVIP10FH_8q24.3	-3.79714	0	-21.3833	-28.5078	0	0	-26.1765	-29.5258	0	-2.46077	-19.3635	0	-36.6209	0	-13.1098	-19.1428	-34.906	0	0	9.73083	0	-14.8751	-28.0127	-20.2289	-26.1864	4.14481	-21.0183	-18.6389	-18.1325	-19.8546	-24.776	-27.4451	-18.3346	0	-42.1297	0	0	-29.366	0	9.32375	-13.1611	-15.3921	-24.2919	-13.0284	13.3165	18.5836	-32.9636	-39.7001	0
HERVIP10FH_9p13.3	0	0	-7.10344	-9.12057	0	0	-9.53355	-7.9914	3.98273	0	0	0	0	0	-8.22039	0	-11.5915	0	0	4.85932	-3.01246	-7.29227	-10.6531	0	-8.26759	0	-10.4391	-8.19331	-5.37119	-8.42343	-6.72151	0	-5.6178	0	-8.36287	0	0	-8.5028	0	0	0	0	-9.49633	0	9.07828	7.56584	-10.9642	-8.41	-8.44383
HERVIP10FH_Xp21.1	-2.61353	0	0	-12.2063	0	7.20763	-9.67793	-13.2485	8.49883	0	0	0	-15.7245	0	-11.7805	-8.76211	-32.3528	2.80222	0	3.80108	0	-16.1037	-18.6336	-14.0641	-11.7644	0	-23.8022	-16.5303	0	-14.8654	0	-12.6058	-15.403	0	-16.7314	0	-10.5232	-14.3053	0	0	0	-14.1415	-14.2898	-14.0838	9.92078	7.38795	-24.9474	-22.225	-20.2929
HERVIP10FH_Xq24	-4.1469	31.2658	-30.3766	-53.8292	-12.2211	24.0449	-37.4219	-57.7648	31.917	-7.14658	-46.4439	-30.5878	-72.8485	36.623	-37.4996	-55.1819	-105.599	22.891	-10.7512	9.91558	-12.2179	-74.3015	-86.4298	-69.0434	-64.5539	12.8913	-94.5252	-68.9939	-26.9032	-68.5312	-38.0462	-73.6941	-59.4068	-5.99026	-87.0794	-6.77973	-41.5608	-84.6455	12.7104	11.282	-27.8848	-70.8931	-77.6465	-45.1992	22.9793	24.2746	-119.898	-99.0147	-89.5421
HERVK11_18q21.1	0	0	-6.26224	0	0	0	-6.58831	-9.75424	0	0	0	-6.01145	-10.317	0	-6.30007	0	0	2.62577	-4.61615	0	-6.30334	-18.4281	-16.2474	-10.0685	-8.65128	0	-19.7363	-11.6061	-5.94798	-12.58	-7.01349	-13.7351	-14.8027	0	-16.0387	0	0	-12.9771	3.19463	0	0	-14.4455	-18.6585	-11.8076	0	0	-15.4784	-17.3986	-15.0621
HERVK11_19p12b	-3.09769	7.98639	-14.9103	-25.4492	0	9.47303	-26.1219	-27.5377	10.4239	-2.53276	-18.6077	0	-32.3358	0	0	-20.6797	-44.6879	15.7896	-4.0285	10.9874	-8.09467	-22.3681	-27.0956	-23.6937	-31.8953	7.32711	-41.1757	-20.8199	-13.1371	-15.9944	-18.6525	-25.2471	-22.3304	-2.35578	-35.279	0	-18.087	-30.0488	0	0	-21.1785	-20.4023	-29.53	-15.2353	0	20.9849	-37.6094	-40.9433	-36.369
HERVK11_1p13.3	-3.60951	14.018	-19.4527	-48.2232	0	14.5932	-25.2841	-41.513	19.1946	-2.74104	-30.1899	-22.9679	-56.2144	21.3534	-20.4084	-39.644	-84.8472	12.9228	-9.61208	11.9198	-10.5562	-51.1283	-62.7738	-41.2493	-43.1859	9.14577	-68.543	-56.8891	-25.2901	-48.0388	-24.1608	-50.597	-42.926	-3.19531	-67.4494	-6.42034	-26.5568	-55.5072	6.59138	10.2698	-18.9179	-52.3709	-53.9443	-31.8372	24.3508	19.0745	-85.4355	-72.3909	-61.2444
HERVK11_1p33	-4.99609	20.7689	-21.501	-49.6974	-9.71587	19.3238	-28.3994	-42.8657	24.2603	-2.51555	0	-26.4167	-60.5669	20.244	0	-38.7474	-74.6722	23.0015	-11.0656	0	0	-40.1125	-70.2626	-45.3611	-40.2705	12.8247	-62.674	-60.0518	-31.8537	-44.6619	-25.1577	-59.7223	-39.8412	0	-59.3078	-12.3319	-34.6716	-63.3387	12.7461	12.4693	-30.3602	-55.6578	-46.7911	-23.4372	28.5217	32.1622	-85.1955	-69.5068	-43.9929
HERVK11_1q32.3	0	0	0	0	0	0	0	0	0	0	0	0	0	0	0	0	6.53159	0	0	0	0	0	0	0	0	0	0	0	0	0	0	0	0	0	0	0	0	4.38584	0	0	4.70914	0	0	0	0	0	6.81577	0	0
HERVK11_22q11.21	-5.2668	10.0967	-16.6261	-32.4424	0	0	-26.9084	-24.579	20.6861	-2.29996	-16.9422	0	-37.307	20.1458	-20.2501	-25.5242	-48.5014	11.231	-3.75544	12.339	0	-25.1062	-36.553	-20.2823	-28.4074	5.00978	-38.0154	-32.0206	-16.1055	-25.6192	-14.6335	-26.9707	-23.4692	0	-37.7326	0	-20.4503	-31.3151	6.81155	0	0	-21.0296	-28.629	-15.4314	27.4163	19.4843	-47.7947	-36.9586	-35.0379
HERVK11_2q34a	-1.75442	0	0	-21.051	0	0	0	-19.9577	0	-1.11592	0	-11.579	-28.4647	0	0	-20.0885	-28.4188	0	-4.2731	0	0	-16.9112	-31.3556	-16.8808	-17.8792	0	0	-25.74	-13.3672	-15.1268	-11.7334	-18.4933	0	0	-27.1952	0	0	-27.1894	0	0	-11.0807	-24.8514	0	0	0	0	-34.8579	-27.1308	0
HERVK11_5q35.1	0	0	0	0	0	0	0	0	0	0	0	0	0	0	0	0	0	0	0	0	7.87082	0	0	0	0	0	0	0	0	0	0	0	0	0	0	-1.02602	0	0	0.157327	0	0	0	0	0	0	0	0	0	0
HERVK11_6q25.3	0	0	-4.44699	-5.68926	0	0	-9.84478	0	0	0	0	0	0	0	0	0	0	0	0	1.57714	0	-4.05795	0	0	-5.23175	0	0	0	0	0	-4.11146	0	0	0	0	0	-4.9649	-3.47552	0	0	-5.4583	0	-4.82606	0	3.00745	2.27923	0	0	0
HERVK11_8p23.1c	-5.47251	0	-19.0324	-33.3828	0	6.43493	-30.3787	-35.0875	7.1674	-1.84865	-28.5983	-7.46593	-41.6524	0	-17.3474	-21.0309	-60.9837	9.42273	-4.30604	7.89109	-9.31409	-36.7265	-38.4448	-31.9144	-38.2369	0	-50.5989	-26.1636	-15.1334	-31.3849	-24.2234	-33.979	-32.0583	-4.46783	-50.8724	0	-19.209	-39.3768	0	11.3253	-15.332	-28.4252	-37.2501	-24.2751	13.6717	14.0294	-54.4011	-51.3202	-50.2308
HERVK11_8q11.1	0	0	0	-12.2201	-5.62494	0	0	0	10.1593	-1.01524	0	-10.2456	-23.043	0	0	0	-22.2564	10.2475	0	0	4.20096	-14.0956	-22.8431	-22.9263	0	6.27873	0	-19.721	0	-17.5986	0	-21.7482	-11.7916	0	-19.3618	0	0	-25.8178	4.83899	0	0	-23.3739	-14.0026	0	0	0	-27.8659	0	-13.4318
HERVK11D_11q14.3	0	0	0	0	0	5.89142	0	0	0	0	0	0	0	0	0	0	0	0	0	0	0	0	0	0	0	0	0	0	0	0	0	0	0	0	0	0	0	0	0	0	0	0	0	0	0	0	0	0	0
HERVK11D_2q31.1	0	0	0	-17.9249	0	0	0	-15.1566	0	0	-12.0884	-12.8956	-21.0849	0	0	-21.7419	-26.816	0	0	0	0	-20.8348	-30.4622	-13.9594	-14.0929	0	-18.9737	-25.8092	-11.6092	-20.6318	-10.6414	-23.8505	-13.6686	0	-21.5484	0	-12.0689	-21.8344	0	0	0	-21.7076	-18.87	0	0	4.30411	-30.9072	-22.2738	-17.176
HERVK11D_3q11.2	0	0	0	0	0	0	0	-2.19851	0	0.0171058	0	0	0	0	0	0	0	0	0	0	0	0	0	-9.4041	0	0	-7.74856	0	0	0	0	0	0	0	0	0	0	-9.5926	0	0	0	0	0	0	0	0	0	0	0
HERVK11D_5p13.2	-2.63382	4.61163	0	-11.3021	-4.56584	4.39247	0	-11.814	9.52784	-2.09924	0	0	-14.8142	0	-10.5679	-11.9823	0	2.71045	0	6.15427	-5.90438	0	-12.6946	-14.1577	-17.9037	0	-18.9103	-14.2348	-10.0731	-14.2172	-10.407	-16.8885	0	-5.01336	0	0	0	-20.2149	2.73371	0	0	0	0	0	0	9.25765	-21.2063	0	0
HERVK14C_15q21.1	0	0	0	-11.6707	0	0	-13.9254	-10.5067	0	0	0	-6.54869	0	0	0	0	-24.4164	0	-6.97621	3.68821	0	-20.0347	-18.6281	-12.5297	-11.564	0	-23.904	-13.0127	0	-12.5858	0	-12.9002	-16.4558	0	-18.7118	-4.89974	-12.9442	-15.1763	0	0	-9.59919	-16.6623	-20.0584	-15.038	8.76638	7.21832	-21.398	-18.9944	-20.4695
HERVK14C_16p12.3	0	14.9703	0	-24.4661	-10.9688	0	-17.3606	-21.102	15.8651	-3.22953	-17.9418	-12.1722	-38.7069	0	0	-20.8924	-39.8716	17.6969	-17.5214	0	0	-21.8731	-33.1721	-22.3708	-21.5896	10.6199	-27.368	-29.7512	-11.1217	-23.2359	-13.837	-34.5447	-19.4649	-4.01213	-29.7647	-11.0715	-16.1688	-32.6523	11.3548	0	-12.9857	-30.4908	-24.7319	0	19.034	19.1722	-37.5389	-36.4302	-23.8298
HERVKC4_1q22	-0.284689	5.76567	0	0	0	2.76265	0	0	3.43251	0	0	0	-9.68578	0	0	0	-6.32408	2.58108	0	0	0	0	0	-4.45481	0	0	0	0	0	0	0	-3.27375	0	0	0	0	0	-6.31256	0.134222	0	0	0	0	0	0	2.42452	-8.74939	-9.0943	0
HERVKC4_6p22.1	0	0	0	0	-8.64771	0	0	0	0	0	0	0	0	0	0	0	-13.2215	0	0	4.6938	0	0	0	0	0	4.96585	0	0	0	0	0	0	0	0	0	0	0	0	0	7.93563	0	0	-10.3469	0	0	8.88342	0	0	0
HERVL_10p13b	-0.449768	0	0	0	-0.540018	0	0	0	0	-0.348458	0	-1.94933	-1.65414	0	0	-2.6617	-1.76988	0	0	0	0	0	-1.93529	0	0	0	0	-2.3608	-2.15573	-2.36639	-1.72195	-2.36663	0	-0.521648	0	0	0	0	0.130774	0	0	0	0	0	0	0	0	0	0
HERVL_10p13c	-0.983921	0	0	0	-1.72882	0	0	0	0	0	0	0	0	0	0	0	0	0	0	0	0	0	0	0	0	0	0	0	0	0	-2.59586	0	0	-0.880261	0	0	0	0	0	0	0	0	0	0	0	0	0	0	0
HERVL_11q12.1c	0	6.02141	0	-22.1111	0	8.77476	0	-15.9277	10.7383	0	0	-19.0964	-27.0341	0	0	-23.5287	-32.4243	0	0	4.6878	0	0	-29.0625	-20.6577	0	0	0	-30.3193	-18.7321	-23.3739	0	-21.7737	0	0	0	0	0	-25.0868	3.90215	0	0	-24.8216	0	0	0	7.67132	-39.4131	-26.204	0
HERVL_11q22.3g	0	0	0	0	0	0	0	0	0	0	0	0	0	0	0	0	-4.10566	0	0	0	0	0	0	0	0	0	0	0	0	0	0	0	0	0	0	0	0	0	0	0	0	0	0	0	0	0	0	0	0
HERVL_12p12.1c	0	0	-3.87903	0	-2.34717	0	0	-6.84953	-0.977792	0	-4.78592	0	-8.76076	-0.975991	-4.00663	-4.08858	-9.77568	0	-2.22532	1.92954	-3.00153	-5.5744	-5.67481	-4.43598	-7.63885	0	-10.1793	-4.42426	0	0	-6.19648	-6.78964	-4.7465	-1.93026	0	-1.76146	0	-6.56725	0	4.05523	0	0	0	0	0	3.68465	-9.10884	-6.90791	-9.93291
HERVL_12p13.1b	0	0	0	0	0	0	0	0	0	-1.25964	0	0	0	0	0	0	0	0	0	0.535132	-3.23558	0	0	0	-8.03361	0	-15.4655	0	0	0	0	0	-8.83369	0	0	0	0	-8.18423	0	0	-9.48985	-10.4178	0	0	0	0	-14.5497	0	-16.6402
HERVL_12p13.1c	-2.4925	6.36763	-15.8914	-33.9068	0	8.03954	-37.9128	-45.2195	15.4923	-3.78539	-35.8577	-20.0138	-61.2194	19.6659	-30.2572	-29.986	-87.6874	8.59861	-9.80995	6.79746	0	-49.5015	-55.4657	-52.1917	-39.545	0	-72.3897	-48.2239	-20.4847	-49.0328	-21.6591	-45.9952	-47.1478	-3.84136	-66.0588	-6.2126	-25.6327	-53.1619	4.46429	0	-19.2421	-48.0742	-46.1092	-39.2608	15.3665	15.6422	-89.7002	-71.5212	-60.0883
HERVL_12q12b	0	0	0	0	0	6.93828	0	0	0	0	0	0	-9.92068	-7.88447	0	0	0	5.19289	0	0	0	0	0	-11.6098	0	4.71272	0	0	0	0	0	-6.18538	0	0	0	-4.84148	0	-11.4267	0	6.93313	0	0	0	0	0	0	0	0	0
HERVL_12q13.12	0	6.13978	0	-12.5329	-3.59648	0	-14.8579	-10.8036	6.52098	0	-10.9984	-10.086	-19.0567	0	-10.1809	-9.5936	-15.2219	5.81382	0	0	0	0	-16.5406	-12.9681	-7.92782	0	-13.1282	-12.3023	-9.64583	-15.0658	-8.8955	-17.759	-8.0762	0	0	0	0	-9.88312	0	0	0	-13.2236	-12.6643	-8.29158	0	0	-21.6147	-15.3047	-10.2973
HERVL_12q13.13	-2.82237	0	-11.2677	-9.90806	-5.01564	6.29967	0	-15.2644	5.2546	0	-8.84663	0	-15.6243	6.17644	-10.5839	-9.91294	-17.1612	3.15386	0	3.46157	0	-6.88756	-13.3701	-17.0142	-14.423	0	-13.9989	-11.6723	-9.5236	-11.4156	-12.7448	-13.6193	-7.24039	-2.67326	-19.0514	0	0	-22.2655	0	0	0	-12.23	-9.31969	0	9.29372	6.93927	-18.5713	-20.3531	0
HERVL_12q21.1e	-0.506014	4.06876	0	0	0	2.10309	0	0	3.45901	0	0	-1.8467	0	2.94398	0	0	0	3.29426	0	0	0	0	0	0	0	1.59676	0	0	0	0	0	-4.91257	0	0	0	0	5.41978	0	0	0	0	0	0	0	0	0	0	0	0
HERVL_12q21.2b	0	13.9917	0	-46.9848	0	0	0	-33.384	15.9155	-2.96023	0	-30.8983	-59.9809	17.9452	0	-37.8578	-75.8919	17.0076	-10.7537	0	0	-34.6998	-68.4165	-42.3755	-33.8174	13.3168	-45.9834	-60.0112	-27.8074	-40.9309	-16.9761	-54.1916	-32.3589	0	-46.4853	0	-25.5596	-53.477	9.30469	19.3579	-22.2285	-56.3738	-34.7365	-20.5383	31.7539	28.1108	-76.2803	-56.7598	-35.9414
HERVL_12q21.2c	0	0	0	-35.4828	0	0	0	-22.0812	18.8608	-2.33733	0	-20.7898	-46.2167	20.333	0	-27.4424	-48.6606	17.2094	-11.6816	0	0	-24.8624	-49.7167	-32.3164	-24.2973	11.7183	-40.6876	-44.5398	-22.4238	-28.1203	0	-42.2733	-27.1103	0	-32.6649	-7.74134	0	-40.0643	7.79122	16.8674	-16.9977	-40.9107	-26.957	0	28.8846	24.5456	-58.9162	-40.2612	-28.5437
HERVL_13q12.12	0	0	-5.21019	-8.66289	0	0	0	-8.72356	0	0	-8.67285	-5.90934	-10.771	0	0	-9.31815	-14.8827	0	-3.7978	0	-2.54441	-10.4408	-13.5267	0	0	0	-10.102	-11.2682	-7.22108	-10.7264	-6.66857	-8.99553	-7.6952	0	-13.143	0	-5.62268	-9.83153	0	0	0	-9.56034	-8.43439	-6.84657	0	0	-12.2639	-14.2079	0
HERVL_13q33.3	0	0	0	-23.0087	0	0	0	-18.42	0	0	0	-15.2318	-32.0633	10.4524	0	-22.0104	-40.1458	0	0	0	0	-18.6052	-38.5258	-21.0324	-15.5752	3.48347	-32.0164	-33.1254	-16.1569	-20.9998	0	-21.0789	-20.0971	0	-25.542	0	-12.2539	-28.7218	0	5.98102	-11.708	-32.3823	-20.7861	0	0	0	-45.5249	-30.7947	-21.6343
HERVL_14q22.3b	0	9.15993	0	-12.0797	0	6.37643	0	-17.226	7.97354	0	-15.3072	-11.691	-23.0934	0	-11.193	-12.455	-28.6186	4.73922	0	0	4.21773	-13.824	-26.5851	-24.8755	-14.6082	3.26711	-15.6958	-22.0919	-11.1369	-18.3899	0	-18.7433	-12.0184	0	0	0	0	-37.0133	0	0	0	-28.6593	-15.9568	-12.8778	0	0	-27.5023	-21.5241	-13.5973
HERVL_15q26.2b	0	-0.00344662	0	0	0	0	0	0	-0.00229743	0	0	0	0	0	0	0	0	0	0.00946785	0	0	0	0	0	0	0	-2.78587	0	0	0	0	0	0	0	0	0	0	0	0	0	0	0	0	0	0	0	0	0	-1.84877
HERVL_18p11.32a	0	0	0	0	0	0.945696	0	0	0	0	0	1.60465	0	0	9.3766	0	0	0	0	0	0	0	0	0	0	3.77195	0	4.98281	0	0	0	0	0	0	0	0	0	0	0	7.94086	3.31937	0	0	0	0	0	0	0	0
HERVL_18q21.2a	-4.52892	19.7916	-19.4425	-55.9514	-10.4866	13.7087	-25.6829	-43.0779	29.3129	-2.86317	-33.695	-31.5105	-70.2796	28.9123	0	-50.8323	-81.2873	24.8663	-12.8745	13.7054	0	-49.445	-76.8869	-41.8372	-42.7161	12.4924	-65.2611	-68.8344	-37.3881	-58.4969	-28.896	-66.6758	-44.8123	0	-62.348	-8.71458	-30.7639	-55.7622	12.1385	13.0197	-26.9197	-57.4788	-44.5897	-27.5872	28.0682	28.8253	-95.7453	-75.3932	-54.8369
HERVL_1p21.3b	0	0	0	0	0	0	0	-12.7917	0	0	0	0	-18.4493	0	0	0	-16.2971	0	0	0	4.52152	0	0	-17.8533	0	0	0	-9.40355	0	0	0	0	-10.4083	0	-22.7002	0	0	-23.9177	0.0935505	0	0	-17.9414	0	0	0	0	-24.8734	-22.6511	0
HERVL_1p22.1b	0	10.9974	0	-28.8926	0	5.76272	0	-20.4863	9.14175	0	0	-30.3437	-45.2726	15.4401	0	-32.2785	-41.787	0	-8.98963	0	16.9302	0	-47.7323	-23.6685	0	6.44948	0	-51.0611	-24.2081	-34.6787	0	-40.1838	0	0	0	-6.50416	0	-35.7775	8.17266	8.11535	0	-43.1603	0	0	0	10.6675	-45.5681	-36.0403	0
HERVL_1p22.2b	-1.44494	0	0	-7.39371	0	0	0	0	0	-0.927829	0	-6.33904	-10.5934	0	0	-9.53294	-10.1891	2.39778	0.544517	0	0	-5.60992	-13.0561	-3.15727	0	0	0	-10.5629	-4.9416	-7.86533	0	-7.95474	-5.26328	0	0	0	0	0	0	0	0	-9.21868	0	-4.77569	0	0	-11.7455	-5.66758	0
HERVL_1p22.2d	0	0	-19.3736	-39.4355	0	6.73817	-28.1144	-40.8802	9.08136	0	-30.1301	-22.7247	-48.5312	0	-29.582	-31.0968	-77.1406	0	-8.7599	0	-17.3699	-57.5874	-61.0597	-43.0185	-36.0279	0	-75.8505	-48.6635	-23.378	-48.799	-24.6772	-42.6808	-47.145	0	-65.8906	0	-30.9733	-55.011	3.68879	0	-19.0274	-49.7146	-61.939	-36.1842	28.9237	16.2743	-82.1178	-68.3632	-66.0634
HERVL_1p31.1d	0	0	0	-28.1733	0	0	-14.8998	-21.8354	7.04008	0	0	-20.6712	-34.0277	0	-16.3089	-28.2881	-38.4176	0	0	4.2445	0	0	-34.9012	-27.0396	-18.7815	0	0	-35.9674	-21.908	-30.2808	0	-35.3007	-18.5571	0	-26.1071	0	0	-27.6402	0	0	-12.7094	-31.9281	0	0	0	8.66569	-48.1103	-35.6238	0
HERVL_1q31.2c	0	2.26877	0	0	0	0	0	0	0.0699398	0	0	0	0	0.256513	0	0	0	0	0	0	0	0	0	0	0	0	0	0	0	0	0	0	0	0	0	0	0	0	1.333	0	0	0	0	0	0	0	0	0	0
HERVL_1q32.1	-1.25386	0	0	-7.82068	0	3.50954	0	-10.8114	4.16555	0	0	-5.12643	-20.4701	0	0	-10.3707	-24.4106	0	0	4.4094	-7.02156	-11.1854	-13.2435	-14.6827	-20.5591	0	-27.4587	-11.2846	-6.23022	-12.7584	-9.19374	-12.6348	-6.77959	0	-19.1698	0	0	-16.1845	0	0	-11.2751	0	-11.989	0	15.6556	8.71571	-32.1941	-15.0576	-20.225
HERVL_20p13	-1.55046	0	-13.8986	-24.3513	0	0	-28.4114	-29.7394	6.1718	0	-28.5773	-6.82659	-38.8028	7.53951	-21.3047	-20.2216	-55.5794	6.94716	0	4.25267	-14.2783	-30.539	-28.7757	-30.5434	-35.5253	0	-56.0363	-23.9584	-13.4759	-27.2176	-21.0178	-32.5942	-25.938	-1.40393	-45.6423	0	0	-33.2995	0	0	-20.9204	-20.6657	-28.9578	-19.0032	13.0066	12.5828	-56.5092	-46.3448	-50.2123
HERVL_21q21.3i	0	8.53596	-21.4611	-45.4255	0	0	-21.8867	-42.2862	11.1746	0	-36.1636	-24.7052	-60.7777	14.8818	-21.2863	-43.6921	-90.9488	0	-9.26911	9.9902	-8.13948	-53.3995	-72.8203	-40.3832	-40.4332	5.72934	-67.0185	-60.3229	-27.1809	-50.0998	-28.5632	-50.2749	-45.4829	0	-70.6066	-6.17479	-27.6987	-49.4977	5.57033	10.3329	-20.9638	-55.4855	-59.658	-35.6928	21.9672	23.6391	-90.7197	-75.9994	-61.3174
HERVL_2p11.2b	-1.74068	5.76756	-9.91106	-21.2439	0	0	-20.9127	-28.1052	12.1096	0	-17.9493	-7.79853	-34.1614	14.6073	-20.7543	-12.1443	-59.3732	6.60609	0	10.0159	-16.9163	-36.4561	-23.499	-34.8221	-36.5772	0	-67.7464	-24.2293	0	-27.2564	-14.3535	-27.9746	-28.959	-1.74072	-48.5786	0	0	-34.2583	0	0	-15.7379	-22.536	-32.3124	-20.227	16.3771	15.1371	-61.3342	-45.5682	-60.5001
HERVL_2q33.3	0	0	-12.6079	-27.9074	-7.52424	9.08873	-19.2495	-27.0931	11.7044	-3.0561	-20.394	-14.5013	-32.8928	0	-16.0894	-20.2886	-50.2048	5.76284	-7.96369	0	0	-35.5542	-39.7566	-23.7752	-28.9883	0	-44.3389	-31.7284	-15.0439	-29.5017	-18.9155	-34.2263	-30.5333	-4.40761	-38.6203	-4.4238	-21.9041	-33.505	0	5.68525	-13.4667	-33.7715	-34.9746	-21.1279	0	0	-49.433	-45.767	-41.6373
HERVL_2q34b	-3.03664	0	0	-18.0427	0	0	0	-12.6375	0	-2.05278	0	-6.42711	-14.3529	0	0	0	-29.1567	5.4567	-4.02197	5.73955	0	-19.403	-18.2711	-16.6407	-16.5944	8.97073	-24.1401	-12.5803	0	-14.3385	0	-21.1955	-17.1297	0	-22.5585	0	0	-18.9794	0	18.8135	0	-18.5512	-17.9925	0	0	8.79121	-27.8825	-26.3942	-27.2698
HERVL_2q34c	-3.03254	0	-22.7086	-40.3745	-7.71458	0	-33.6508	-38.4418	0	-2.02652	-33.0923	-13.0992	-50.3627	0	-19.8738	-33.2741	-82.4945	8.89082	-9.77787	9.8862	-11.0825	-50.1308	-50.7817	-38.7534	-41.3614	5.97223	-69.6804	-39.0988	-14.9887	-34.548	-26.6931	-40.4067	-43.5009	-3.4274	-61.8557	-5.87131	-27.5932	-44.9015	0	11.9349	-21.0961	-42.0927	-52.8794	-32.1857	14.8046	17.4768	-76.2011	-65.9614	-66.1078
HERVL_2q37.1	0	11.4475	0	0	0	10.6877	0	-13.6982	13.8208	0	-16.6772	0	-19.9991	10.8359	-12.8867	0	0	0	0	0	0	0	-18.3049	-17.7388	0	0	0	-16.385	0	-15.2641	0	-13.0004	0	0	0	0	0	-28.5404	0	0	0	-18.6557	0	0	12.8676	0	-23.3806	-15.3737	0
HERVL_3p13b	-1.89651	4.41864	0	0	0	0	0	-15.268	0	0	0	0	0	0	0	0	0	0	0	0	12.2324	0	0	-17.805	0	0	0	0	-6.00115	0	0	0	0	-1.76983	0	0	0	-15.8337	0	0	-9.44231	0	0	0	0	0	0	0	0
HERVL_3p24.3b	0	4.96498	0	0	0	2.34415	0	0	4.8338	0	0	0	0	5.68478	0	0	0	2.36222	-0.600478	0	0	0	0	-6.93919	0	3.05474	0	0	0	0	0	0	0	0	0	-2.48899	0	-8.01277	0	0	0	-6.50543	0	0	0	0	0	0	0
HERVL_3q11.2c	0	0	0	-10.9632	0	0	0	0	0	0	-12.4086	-6.92189	-15.28	0	0	-9.67032	-22.098	0	-3.62782	0	0	0	-16.8556	-17.852	0	0	0	-14.3408	0	-11.0438	0	-15.6343	-9.04956	0	-14.0702	-4.14006	-14.3839	-22.5278	0	0	0	-22.2956	-14.3658	0	0	0	-19.6187	-13.3382	-8.56332
HERVL_3q25.1	0	0	0	-14.754	0	0	0	-14.5375	0	0	0	-9.47665	-23.8841	0	0	-19.712	-38.382	6.60547	-7.57962	0	-10.9718	-23.7314	-28.6132	0	0	0	-33.8861	-24.5086	-11.9398	-18.3093	-11.8671	-20.0341	-17.6433	0	-23.6936	-5.31495	0	-18.3739	0	6.43901	0	0	-19.2886	0	0	8.76871	-33.7967	-27.0985	-27.801
HERVL_3q25.32	-4.04402	20.7409	-16.7817	-38.2498	-10.8499	20.1636	-24.5544	-45.0395	15.9755	-2.91422	-31.7305	-27.1036	-59.4218	0	-23.0128	-36.4978	-87.3223	12.8755	-8.46998	0	-13.1278	-59.9254	-69.5448	-51.2931	-45.729	13.1948	-83.7254	-58.4679	-20.9438	-51.8032	-26.309	-57.1301	-47.383	-3.42584	-67.0779	-6.05821	-33.463	-68.0386	8.087	13.942	-19.9165	-57.3123	-64.6262	-35.6349	0	24.0764	-92.5797	-75.3661	-72.7159
HERVL_4p15.2c	0	0	0	-9.33142	0	0	0	0	0	0	0	0	0	0	0	-8.08582	0	0	0	0	0	0	0	0	0	0	0	-8.37533	0	0	0	0	0	0	0	-2.6377	0	0	0	0	0	0	0	0	0	0	0	0	0
HERVL_4p16.3a	0	-2.46722	-6.86076	-9.09632	0	0	-10.4465	-14.3394	0	0	0	-6.29172	-14.8913	0	-9.82212	0	-27.6782	0	0	3.55287	-6.53719	-17.3482	-16.1926	-14.4355	-13.0323	0	-27.4884	-13.0707	-7.59467	-15.4149	-9.66001	-11.7038	-15.3153	0	-19.242	0	0	-14.7729	0	0	-7.24316	-13.8881	-18.0955	-11.6895	17.5826	6.78664	-25.8332	-20.4369	-23.0893
HERVL_4q13.2b	-0.435006	0	0	0	-3.64736	0	0	0	0	-0.912497	0	-11.8646	-14.578	0	0	0	0	0	0	0	0	0	-12.8963	0	0	3.72607	0	-13.9717	-11.1524	-10.1271	0	-17.5798	0	0	0	0	0	0	0	0	0	-13.0721	0	0	0	0	-13.3602	0	0
HERVL_4q24d	-1.82601	0	-14.5662	-13.3495	0	0	-25.3714	-33.1691	5.89142	0	-28.7555	-10.4391	-38.7165	5.98028	-24.756	-13.1482	-63.1647	3.53783	0	4.35163	-20.3032	-41.939	-29.1883	-39.4487	-39.1422	0	-78.0051	-21.3565	-11.2912	-32.6703	-18.2925	-32.6174	-35.7654	-2.01944	-51.8859	0	-19.4672	-36.9868	0	0	-15.5637	-28.2071	-43.9298	-26.5467	14.1562	9.36374	-72.3888	-47.6603	-71.2409
HERVL_4q32.1a	-6.76166	42.3522	-33.2524	-74.6225	-17.448	28.8952	-36.9029	-77.0489	44.8141	-7.09145	-55.7577	-54.8741	-114.103	49.387	-30.758	-73.1257	-156.225	34.1621	-12.0441	0	-15.0819	-90.9327	-121.996	-90.6437	-77.8887	19.5993	-130.451	-107.295	-44.7222	-92.7404	-38.4731	-102.87	-73.9036	-5.2582	-105.108	-6.48969	-46.4492	-116.194	15.4511	25.6895	-43.6946	-104.479	-91.2081	-54.5465	27.9437	31.1419	-172.745	-126.336	-111.919
HERVL_4q32.1c	0	0	0	0	-6.82823	0	0	0	-0.318931	0	0	0	0	0	0	0	0	0	0	0	0	0	0	-10.6172	-6.44576	0	0	0	0	0	0	0	0	0	0	0	0	-12.9454	0	0	0	0	0	0	0	0	0	0	0
HERVL_4q34.1c	0	13.2555	-17.9426	-49.4467	0	16.0162	-25.1952	-45.966	15.5201	-3.02528	-33.786	-35.1007	-68.089	0	0	-49.1661	-102.667	18.1182	-7.75325	14.2454	-9.83038	-59.3982	-83.0157	-47.9882	-45.3954	11.4126	-76.6994	-68.3406	-29.9777	-53.8188	-33.1004	-60.0107	-46.3921	0	-63.1887	0	-33.2339	-64.7784	8.30548	16.4025	-22.1073	-67.7353	-60.907	-34.1542	30.5388	24.6352	-98.3189	-72.3093	-65.8264
HERVL_4q34.1d	0	0	0	-13.5533	0	0	0	0	0	0	0	-9.31503	0	0	0	-11.7714	0	0	-5.06164	2.66482	0	0	-16.1927	0	0	0	0	-13.8041	-6.93787	0	0	0	0	0	0	-2.52592	0	0	0	0	0	-12.9647	0	0	0	4.94435	0	0	0
HERVL_4q35.2	-2.80421	0	-19.1575	-36.0934	0	0	-29.1216	-33.4623	0	-2.58625	-28.3597	-14.6671	-46.6728	0	-18.205	-28.7889	-66.9188	7.40132	-10.2729	0	-12.574	-43.2403	-45.1366	-29.9633	-36.3422	0	-62.385	-32.1456	-17.0112	-34.4775	-25.687	-36.543	-37.9954	-2.38456	-58.219	-7.82345	-26.5973	-39.0986	6.88635	7.77397	-17.0181	-34.2793	-48.6419	-24.9378	20.282	15.1384	-68.3361	-56.9853	-58.4805
HERVL_5p13.3b	0	0	-11.0435	-16.6967	0	1.88781	-23.8611	-18.4881	3.6347	0	-17.1194	-4.73023	-24.5688	0	-14.9465	-10.7312	-33.2746	7.79279	0	2.80764	-10.1147	-19.9778	-16.7641	-19.1137	-22.2124	0	-36.9138	-13.6042	-8.18056	-19.3685	-14.5649	-22.5397	-17.7542	0	-30.2705	0	-8.79202	-18.432	0	0	-15.433	-12.1665	-21.2457	-14.2501	10.5259	9.62256	-36.68	-26.9667	-31.4016
HERVL_5p14.1g	0	0	0	0	-4.19193	0	0	0	0	0	0	0	0	0	0	0	0	0	0	0	0	0	0	0	0	0	0	0	0	0	0	0	0	0	0	0	0	0	0	0	0	0	0	0	0	0	0	0	0
HERVL_5p15.2b	9.9432e-06	0	0.253735	0	0	0	0.257743	0.264653	0	0	0.0466071	0.0221065	0.0411779	0	0.257387	0.0160085	0.263518	0	7.68877e-05	0	0	0.271713	0.0365781	0.270851	0.512426	0	0.480762	0	0.00369495	0	0.0525234	0.0512466	0.255621	0	0	0	0.255413	0.273101	0	0	1.13115	0.495549	0.255406	0.254101	0	0	0.0451749	0.27331	0.708298
HERVL_5q12.3	-3.01738	0	0	0	-5.91219	0	0	-17.257	0	0	0	-7.40626	-26.1802	0	0	-17.1888	-33.8667	0	-11.3427	0	4.12327	-13.2489	-17.3953	-22.5212	-18.2956	0	-26.3252	-13.7434	0	-18.335	-10.5463	-20.5953	-13.5838	-2.39433	-31.4796	-7.8867	-14.061	-22.3163	5.00806	0	-10.1141	-23.2356	0	0	14.8579	11.991	-35.6809	-31.251	-23.9014
HERVL_5q14.3b	0	0	0	0	0	0	0	0	0	0	0	0	0	0	9.6946	0	0	0	0	0	0	0	0	0	0	4.23092	0	0	0	0	0	0	0	0	0	0	0	0	0	0	0	0	0	0	0	0	0	0	0
HERVL_5q14.3d	0	0	-8.18253	-15.1087	0	-4.69573	0	-9.00642	-4.06409	0	0	0	-14.229	0	-8.89638	-13.9331	-12.9761	0	0	0	0	0	-15.0872	0	-9.23131	0	0	-14.4012	-9.5091	-10.8618	-10.0059	-9.65429	0	0	-11.1155	0	0	-9.23572	0	0	0	0	0	0	0	0	-15.9766	-9.31846	0
HERVL_6p12.3a	0	0	0	0	0	0	0	0	0	-0.782419	0	0	0	0	0	0	0	0	0	0	0	0	0	0	0	0	0	0	0	0	0	0	0	0	0	0	0	0	0	0	0	0	0	0	0	0	0	0	0
HERVL_6p21.33b	0	0	0	-10.5496	0	0	0	0	0	0	0	0	-11.8283	0	0	0	-19.2242	0	0	3.64485	-4.54763	-11.4068	-13.8841	-10.7371	0	4.26523	-17.65	-11.1778	0	-10.1858	0	-10.5069	-14.0335	0	-14.47	0	0	-11.4984	0	0	0	0	-17.1752	0	11.5639	9.37619	-16.5393	0	-16.7759
HERVL_6p25.2	0	0	0	0	0	0	0	0	0	0	0	0	0	0	0	0	0	0	0	0	0	0	0	0	0	0	0	0	4.41164	0	0	0	0	0	0	0.72348	0	0	0	0	0	0	0	0	0	0	7.17358	0	0
HERVL_6q11.1b	-1.42735	0	-7.2489	-14.1895	0	4.07831	0	-9.22373	11.7444	-1.42038	0	-5.27978	-15.121	16.967	0	-8.52379	-26.3028	3.37096	0	4.23786	-12.2731	-12.3501	-14.6091	-9.87752	-15.9015	0	-26.3207	-13.7592	-9.15403	-12.311	0	-19.0925	-8.94837	-1.69219	-15.7291	0	0	-11.6173	0.121464	0	0	0	-12.9199	0	6.09412	8.33597	-28.2987	-12.1585	-24.7228
HERVL_6q24.1g	0	0	0	0	-9.13679	0	0	-11.7067	0	-1.29949	-15.3877	0	-15.0618	0	0	0	-16.8388	7.75538	0	0	3.806	0	-11.7077	-14.3147	0	6.06701	0	-9.53116	0	0	0	-17.3714	0	0	-18.2421	0	0	-23.8465	0	0	0	-14.7204	0	0	0	0	-14.9689	-13.2341	0
HERVL_6q27a	0	2.52798	0	0	0	1.61268	0	0	2.31181	-0.392289	0	0	0	2.84821	0	0	0	0	0	0	-1.97229	0	0	0	0	0	-7.61865	0	0	0	0	0	0	-0.137736	0	0	0	0	0	0	0	0	-5.40492	0	0	0	0	0	-6.81777
HERVL_6q27g	0	0	0	0	0	4.70721	0	0	0	0	0	0	0	0	0	0	21.9405	-3.44262	0	0	21.1396	26.7091	0	0	10.8137	0	39.855	0	-6.23211	0	0	0	0	0	0	-3.13922	0	0	0	0	0	0	22.5228	0	0	0	0	0	41.4787
HERVL_7q11.21b	-2.09107	0	0	-15.3112	-4.17559	3.81629	-14.026	-8.77093	7.38466	0	-11.7695	0	-14.031	7.43466	0	-8.71267	-19.6192	6.63483	0	0	-4.14938	-11.9809	-10.6342	-10.1543	-10.8322	0	-19.6072	-11.23	-5.21789	-16.2478	-5.89264	-13.5038	-10.177	-2.04896	-20.8337	0	-9.09366	-6.91568	0	4.54113	0	-8.97927	-8.45684	-8.4627	0	0	-20.0621	-17.9689	-18.4007
HERVL_7q32.1	-1.80836	13.6153	0	-15.0193	0	10.8839	0	-11.9687	12.9325	0	-15.9652	-7.43809	-25.6212	0	0	-13.336	-29.7003	12.829	-13.2873	0	6.9562	-18.2349	-20.568	-24.0217	-12.1527	6.86015	-18.4286	-16.8158	0	-13.6824	0	-19.7794	-17.1763	0	-22.2188	-7.31111	-14.5436	-31.5031	6.14937	0	0	-25.23	-15.2282	0	0	0	-31.3135	-28.9382	-16.8488
HERVL_7q36.1b	-2.95865	4.54917	-21.6392	-34.9526	0	11.8003	-37.6069	-42.2148	9.97628	-2.08362	-39.7536	-9.26124	-54.7647	13.2629	-29.1963	-22.1572	-73.1634	8.41594	0	7.97051	-11.8918	-45.9371	-44.2956	-43.2386	-46.3972	0	-70.8985	-34.473	-17.3743	-41.3047	-27.3784	-37.8929	-38.0371	-2.71826	-67.9356	0	-20.3986	-47.9131	0	9.47792	-21.976	-36.5846	-43.3297	-28.9979	18.8877	18.0006	-81.8759	-64.3082	-67.0073
HERVL_8q24.3a	0	0	0	-31.0444	0	0	0	0	0	0	0	-25.2004	-41.219	0	0	-29.3622	-38.4976	0	-6.69592	0	0	-23.3605	-48.2326	0	-18.3404	0	0	-41.2427	-21.6677	-36.83	0	-32.9886	0	0	0	0	0	-26.8356	3.1564	0	0	-33.2331	-24.7668	0	0	11.1801	-46.9619	-30.4949	0
HERVL_9p21.3a	-0.792898	0	0	0	-1.72122	0	0	0	0	-0.412866	0	0	-6.51369	0	0	0	-4.93068	0	-0.588624	0	0	0	0	-5.86736	0	0	0	0	0	-4.91355	0	-2.94041	0	-1.11784	-7.49002	0	0	-4.23958	0	0	0	0	0	0	0	0	-5.99208	-6.72168	-6.94396
HERVL_9p24.1b	-1.45651	0	-8.82044	-10.2637	-3.36726	0	0	-12.1027	0	-2.16786	0	0	-10.953	0	0	0	0	0	0	5.31627	0	0	0	-11.46	-10.4905	0	0	0	0	0	0	0	0	-1.46648	0	0	0	-16.792	0	0	0	0	0	0	15.0715	8.24204	0	0	0
HERVL_9q21.11a	0	0	0	0	0	0	0	0	0	0	0	0	0	0	0	0	0	0	0	0	0	0	0	0	0	0	0	0	0	0	0	0	0	0	0	0	0	0	0	0	0	0	0	0	0	0	0	0	0
HERVL_9q22.32	0	12.002	0	-13.7598	0	16.4114	0	-19.719	10.3612	0	-19.7424	-9.01146	-32.8279	0	-15.8582	0	-28.5567	0	0	0	0	0	-25.5744	-28.583	-15.0777	3.86861	-25.3422	-22.6228	0	-22.1882	-8.93773	-20.2003	0	0	-22.5589	0	0	-39.3179	2.69144	0	0	-26.7354	-17.8451	-12.1032	14.451	6.70014	-35.9426	-26.6444	-17.3233
HERVL_9q31.1a	0	0	-2.6381	-3.79032	0	0	0	0	0	0	-3.34356	-1.43447	-5.81947	0	-2.70903	-5.11705	-6.45111	0	0	0	-2.56388	-2.84526	-3.75624	0	-4.92068	0	-5.91458	-3.8548	-3.23136	-4.87206	-3.49836	-4.72207	0	0	-6.16419	0	0	-2.92089	0	0	0	0	0	0	0	0	-7.12168	-5.63159	-4.89874
HERVL_Xq21.33a	-4.18504	0	0	-20.186	0	0	0	0	0	-4.18952	0	0	0	0	0	-16.6764	0	0	-5.49557	6.29584	11.3913	14.4559	0	0	0	7.8052	0	-15.3439	0	0	0	0	0	0	0	-4.61065	0	0	0	0	0	0	0	12.1127	0	14.8308	0	0	0
HERVL_Xq21.33b	-2.51793	0	-12.7033	-27.4116	0	0	0	-19.2338	0	-3.92184	-12.1452	0	-30.3369	0	-15.109	-27.8324	-19.2897	0	0	4.13927	0	0	-26.1603	0	-13.0652	0	0	-22.9017	-16.0191	-14.2493	-16.6955	0	0	0	-21.2843	0	0	-17.7422	0	0	0	0	0	0	12.5901	11.7732	-20.1601	-18.4261	0
HERVL_Xq21.33d	0	0	-11.5647	-33.7852	0	0	0	-23.2927	23.7847	-1.52999	-17.2005	-25.0065	-40.5694	26.4271	-14.8154	-32.5094	-49.8011	23.818	-7.39571	0	0	-32.0247	-53.3855	-25.2576	-20.9937	3.90526	-35.6188	-44.9686	-24.6819	-35.0618	-17.0663	-40.6442	-25.9856	0	-34.8579	-4.81293	-14.703	-34.9707	0	0	-17.2608	-40.1795	-34.222	-18.1886	0	20.022	-57.4033	-38.8881	-27.2402
HERVL18_11p14.1	-0.715937	0	0	0	-0.845999	0	0	-5.69846	0	0	0	0	-9.225	0	0	-8.20031	0	0	0	0	0	0	-9.02757	0	0	0	0	-8.22995	0	-7.22961	0	-6.96638	0	-0.799293	-10.2721	0	0	-5.75257	0	0	0	0	0	0	0	0	0	0	0
HERVL18_11q14.2b	-2.67539	0	0	-31.3929	-10.5533	0	0	-29.741	0	0	-22.5128	-31.0597	-42.4108	13.1896	0	-32.7663	-41.3681	0	-9.36299	6.11526	0	-22.1126	-46.3835	-37.7343	-22.1793	5.4923	-29.0648	-43.449	-21.0709	-40.5213	0	-45.981	-24.2875	-3.12231	-41.7127	-8.11863	0	-45.6423	0	8.34154	-15.8242	-49.3449	-23.884	-18.6411	0	12.5667	-59.2649	-47.6112	0
HERVL18_12q21.31	0	0	0	0	0	6.70856	0	0	6.68155	0	0	0	0	5.40256	0	0	0	4.44287	0	0	0	0	0	-6.28582	0	0	0	0	0	0	0	0	0	0	0	0	0	-8.02304	0	0	0	-4.94182	0	0	0	0	0	0	0
HERVL18_15q21.3	0	17.2042	0	-42.2261	-9.19378	13.4883	0	-26.2425	19.4559	-3.89344	0	-20.6637	-46.3115	0	0	-36.0143	-64.2521	19.0606	-13.6777	0	0	-31.0374	-55.4522	-26.8139	-31.0619	10.0429	-46.4127	-51.4999	-26.8725	-36.7523	-20.0772	-48.8454	-28.5875	-4.65396	-39.951	-10.8617	-22.7918	-37.1013	9.79657	0	-20.9556	-38.7432	-35.6435	-19.3559	0	21.6662	-68.5037	-44.9914	-40.2889
HERVL18_18q21.32	0	0	0	0	0	0	0	0	0	0	0	0	0	0	0	0	0	0	-1.55745	0	0	0	0	0	0	0	0	0	0	0	0	0	0	0	0	0	0	0	0	0	0	0	0	0	0	0	0	0	0
HERVL18_1p12	0	5.06033	0	0	0	11.5689	0	0	8.70123	-0.368904	0	0	0	0	0	0	0	0	0	0	0	0	0	0	0	0	0	0	0	0	0	0	0	0	0	0	0	-8.06486	0	0	0	0	0	0	0	0	0	0	0
HERVL18_1q32.2	0	4.88278	0	0	-9.17289	4.61408	0	0	0	-2.96721	0	0	0	0	0	0	0	0	0	0	-3.74845	0	0	-16.596	0	0	-21.5202	0	0	0	0	-12.1094	0	-5.60923	-12.6741	0	0	-18.6019	0	0	0	-14.1157	-12.7271	0	0	0	-18.3908	-13.247	-14.9662
HERVL18_21q21.3	0	0	0	-4.97465	0	0	0	-5.96668	0	-3.22333	-5.23393	0	-6.83885	0	-4.86791	0	-6.60503	0	0	0	-3.84506	0	-4.38356	0	-9.30611	0	-11.6501	-3.43165	-2.45015	-6.21354	-3.92309	-5.20608	-3.97808	0	-7.33731	0	0	-6.56534	0	0	0	0	0	0	0	0	-9.47233	-6.27941	-10.5281
HERVL18_2p12	0	0	0	0	-5.94992	0	0	0	9.57079	-1.9409	0	-8.17354	0	0	14.851	0	0	10.7353	-4.49873	0	4.90555	0	0	0	0	7.7344	0	-9.86998	0	0	0	-18.7452	0	0	0	-4.18073	0	0	0	9.78412	0	0	0	0	0	0	0	0	0
HERVL18_2q23.1	0	4.25632	0	0	0	10.622	0	0	7.74566	0	0	0	-5.16076	0	0	0	-6.23594	0	0	0	0	0	0	-4.35904	0	0	0	0	0	0	-3.87603	0	0	0	0	0	0	-6.54766	0	0	-3.27518	0	0	0	2.60203	2.8076	-7.28116	0	-6.95259
HERVL18_2q31.1	0	2.38299	0	-8.89777	0	0	0	0	6.98647	0	0	-6.27383	-20.4909	8.69592	0	-16.2204	0	0	-3.94662	1.71058	0	0	0	0	0	0	0	-12.5285	-11.0944	0	0	-10.7235	0	0	0	0	0	0	0	0	0	0	0	0	0	4.36564	0	0	0
HERVL18_3p21.31a	0	0	0	-5.71806	0	4.04489	-4.87845	0	0	0	0	0	-6.38375	-2.7679	0	-4.50319	0	0	0	0	0	0	0	-7.04146	0	0	0	0	0	-6.7993	0	0	0	0	0	0	0	0	0	0	0	0	0	0	0	0	-10.033	0	0
HERVL18_3p21.31b	0	0	0	-16.4207	0	4.71902	0	0	0	0	0	-10.2679	-13.4811	0	0	-13.0905	-23.4151	0	0	2.2388	-5.82511	0	-17.4739	0	0	0	-17.3377	-17.9368	-7.18087	-18.7118	0	-11.846	0	0	0	0	0	0	0	0	0	0	0	0	0	4.22489	-29.583	0	-17.5784
HERVL18_3q25.31	0	4.04169	0	3.42592	0	5.27905	0	0	8.08467	0	0	0	0	0	0	0	0	0	0	0	0	0	0	0	0	1.21182	0	0	0	0	0	0	0	0	0	0	0	0	0	0	0	0	0	0	0	0	0	0	0
HERVL18_4p15.2a	0	0	0	0	0	0	0	0	0	-2.23218	0	0	0	0	0	0	0	0	0	-7.19425	0	0	0	0	0	0	0	0	0	0	0	0	0	0	0	0	0	0	0	0	0	0	0	0	0	0	0	0	0
HERVL18_4p15.2b	-2.65603	0	-21.8672	-30.9763	0	0	-28.3827	-37.1022	0	-1.33434	-32.8833	-8.36389	-43.8094	7.82664	-21.0869	-25.9621	-64.5717	0	-4.20968	10.6428	-12.3209	-43.8878	-38.7499	-30.763	-40.1781	0	-62.3771	-29.4764	-17.6444	-36.1242	-29.6384	-36.3686	-33.5452	-2.56668	-59.987	-3.54735	-19.1564	-40.8674	0	7.59345	-14.9872	-26.7258	-44.9684	-26.334	18.6323	17.1168	-63.5959	-56.6996	-57.3116
HERVL18_4q21.1	-2.23621	9.01059	0	0	0	0	0	0	0	-2.54217	0	0	-14.5598	0	0	0	0	6.99344	0	0	0	0	0	-14.2246	0	0	0	0	0	0	0	0	0	0	0	0	0	-16.6825	0	0	0	0	0	0	0	0	0	0	0
HERVL18_4q21.23	0	7.45716	0	-16.1216	-6.14933	2.89458	0	-17.4401	0	0	-22.6866	-13.8324	-28.253	0	0	-16.158	-38.5665	6.92363	0	0	0	-19.0623	-28.1285	-26.0677	-13.3841	0	-18.5846	-25.2136	0	-20.5341	0	-27.0946	-15.5163	0	-25.4054	0	0	-31.6345	0	0	0	-33.321	-18.0049	-14.569	0	0	-33.0247	-21.2179	-18.8729
HERVL18_5q21.2	0	0	0	0	-6.20353	0	0	-10.6642	11.4482	-0.916897	-16.0044	0	-15.3169	11.1703	0	0	-18.0115	10.9002	-3.26238	0	3.31112	-11.9875	-13.3394	-21.0542	0	8.11049	0	-11.2096	0	0	0	-17.2333	-10.6783	0	0	0	0	-25.3479	0	9.9624	0	-20.7074	0	0	0	0	0	-13.8454	0
HERVL18_5q34	-1.2562	0	0	0	-4.5071	0	0	0	0	-0.932449	0	0	0	0	0	0	0	0	-4.74387	3.77298	0	0	0	0	0	4.30158	0	0	0	0	0	0	0	0	0	0	0	0	0	9.1223	0	0	0	0	0	9.97245	0	0	0
HERVL18_6q13	0	11.6171	0	0	0	0	0	0	4.83661	-1.88539	0	-8.61972	0	6.68224	0	0	0	0	-10.1974	0	0	-15.7156	-16.5519	-11.4545	0	0	0	-14.632	0	-13.1622	0	-14.3156	-11.1491	-3.86776	0	-8.49322	0	0	0	0	0	-21.0551	0	0	10.3917	6.09522	-16.6316	0	0
HERVL18_6q14.1	0	12.7558	0	0	0	14.6407	0	0	15.08	-2.33544	0	0	0	12.8725	0	0	0	3.32487	0	0	0	0	0	0	0	3.3189	0	0	0	0	0	0	0	0	0	0	0	-9.55728	0	0	0	0	0	0	0	0	0	0	0
HERVL18_7p21.3	0	0	0	0	0	0	-1.1459	0	0	0	0	0	0	0	0	0	0	0	-0.00983206	0	0	0	0	0	0	0	0	0	0	0	0	0	0	0	0	0	0	0	-0.00896821	0	0	0	-1.59437	0	0	0	0	0	0
HERVL18_9q21.13	0	0	0	0	0	0	0	0	0	0	0	0	0	0	0	0	0	0	-1.85703	0	0	0	0	0	0	0	0	0	0	0	0	0	0	0	0	-3.52549	0	0	0	0	0	0	0	0	0	0	0	0	0
HERVL18_Xq24	-2.92355	0	-8.41244	-18.7416	-5.47512	5.47607	-19.538	-15.7361	7.52802	0	-13.006	-6.70996	-23.7193	4.86381	-12.6751	-9.20954	-32.9306	2.31352	0	4.41236	-8.43828	-19.5163	-20.0312	-17.776	-18.7139	0	-33.0049	-16.2763	-9.11987	-17.9864	-8.92808	-16.667	-16.1889	-3.02912	-23.6116	0	-10.0408	-16.7356	3.63923	0	-8.92796	-17.2427	-19.7088	-10.737	12.1489	10.0819	-36.8618	-26.2706	-31.9109
HERVL32_2p15a	0	0	0	0	-2.80143	0	0	0	0	0	0	0	0	0	0	0	0	0	0	0	0	0	0	-2.43656	0	0	0	0	0	0	0	0	0	0	0	0	0	0	0	0	0	0	0	0	0	0	0	0	0
HERVL32_2q31.3	-4.35183	13.4784	0	-42.3732	0	22.7005	0	-36.185	28.1107	-2.87043	0	-36.2929	-65.6187	29.3313	0	-38.8557	-88.6946	28.0976	-8.88719	9.10896	0	-54.9548	-76.2637	-48.4363	-32.3788	20.5586	-68.4668	-65.4484	-25.748	-49.8745	0	-64.2789	-42.6599	0	-54.1134	-6.14621	-29.4787	-66.4042	10.2572	20.5699	-16.2446	-63.4264	-53.4284	-26.6799	24.5561	26.2903	-93.634	-68.0378	-53.1239
HERVL40_10p12.1	-0.869968	0	0	-3.61886	-1.29111	0	0	0	0	0	0	-1.95866	0	0	0	-2.72352	-5.0574	0	0	0	-2.83244	-3.5184	-3.60454	0	-3.28529	0	-6.15968	-3.4823	-3.32052	-6.28153	0	-4.69973	-3.29481	0	0	0	0	0	0	0	0	0	-3.57857	0	0	0	-7.54704	-4.47386	-5.86367
HERVL40_11q13.4b	0	0	-27.5115	-54.4952	0	0	-24.9078	-55.417	18.6726	0	-39.0267	-33.9267	-76.4642	24.0013	-36.874	-60.6217	-111.294	9.07028	-9.15318	12.0221	-12.9347	-60.7153	-85.0515	-52.357	-55.7932	0	-88.1384	-70.6442	-37.9233	-63.9847	-35.4466	-63.1747	-50.2235	-2.78856	-80.1017	0	-37.003	-66.2249	5.23775	0	-35.5549	-57.2231	-66.4506	-38.2436	27.7242	22.2295	-116.409	-83.3205	-74.3745
HERVL40_14q13.1b	0	0	0	-20.8575	0	0	0	0	0	-1.70244	0	0	-19.3901	0	0	-20.5299	0	0	-3.96433	0	5.61696	0	0	0	-12.2496	8.12546	0	-13.7104	-11.5421	0	0	-15.4934	0	0	0	0	0	-9.47582	0	11.3937	0	0	0	9.58045	0	9.25261	0	0	0
HERVL40_18q11.2c	0	14.4983	0	0	0	12.6901	0	0	10.8142	0	0	-17.4533	-28.225	12.2323	0	-20.2242	-38.8744	13.2132	-8.53234	0	0	0	-36.2214	-17.5376	0	12.386	-27.1622	-36.1094	0	-24.2318	0	-34.8247	0	0	0	-6.57559	0	-26.9019	6.80487	15.6004	0	-33.1215	0	0	0	5.64895	-41.9503	-29.3859	0
HERVL40_18q22.1a	0	0	0	0	0	0	0	0	0	0	0	0	0	0	0	0	0	0	-2.93229	-7.4414	0	0	0	0	0	0.907376	0	0	0	0	0	0	0	0	0	0	0	0	0	0	0	0	0	0	0	0	0	0	0
HERVL40_19q13.42	0	0	0	0	0	0.442031	0	0	1.385	0	0	-2.97631	0	0	0	-4.92688	-16.1209	3.1162	0	1.23005	-6.00564	-8.89001	-6.64704	0	-6.79481	1.11952	-17.9591	-6.8901	0	-9.75231	0	-9.04721	-7.01567	0	0	0	0	0	0	4.08299	0	0	-8.84628	0	0	0	-16.546	-8.16424	-17.3935
HERVL40_1q44	-1.5475	8.2967	-8.75916	-13.5147	-3.69735	0	-27.3067	-15.5392	6.39536	0	-9.20661	0	-19.7891	0	0	0	-19.4619	7.73052	0	4.26061	0	-9.66338	-10.072	-25.8195	-16.5662	0	-22.7389	-5.95532	0	-8.39683	-9.96379	-16.5146	-11.412	-1.32383	-18.8681	0	0	-23.2707	0	0	-15.9362	-17.3441	-12.5959	-8.68702	9.26145	9.6449	-20.2572	-21.3549	-15.0935
HERVL40_22q11.23	0	8.77491	-25.4952	-50.8806	0	5.63493	-36.6751	-49.3429	12.2045	0	-36.899	-24.276	-61.6146	14.6729	-36.466	-41.7553	-92.3382	0	-7.84269	7.42034	-12.8723	-56.9132	-71.467	-52.291	-46.9111	0	-82.8741	-58.5497	-26.5727	-58.4791	-31.7053	-52.5286	-50.2018	0	-78.0858	0	-33.8058	-58.6507	0	0	-26.0044	-60.6594	-59.8495	-40.851	32.4926	18.4377	-98.3779	-78.6707	-68.3847
HERVL40_22q13.2	-2.54646	0	-16.5205	-23.2981	0	0	-32.8329	-39.153	6.34419	0	-32.7258	-10.0225	-47.3275	7.61215	-28.1688	-24.8623	-72.9037	7.69372	0	6.49144	-14.3339	-46.547	-37.2003	-45.432	-42.2701	0	-75.1583	-28.4611	-11.7791	-32.4792	-23.1027	-38.6157	-40.7324	-2.7264	-54.9398	0	-23.362	-42.5121	0	5.96604	-24.6637	-35.1361	-46.7795	-35.1938	17.0317	12.0873	-71.0645	-58.8971	-66.2997
HERVL40_2p23.3b	0	0	-12.6953	-21.212	0	0	-24.1382	-22.6225	10.4711	0	-21.5087	-5.24701	-25.5891	15.7572	-17.3392	-9.68187	-44.8585	9.02407	0	4.75021	-11.8606	-30.3132	-19.6369	-22.7285	-24.6765	0	-48.4808	-17.0675	-7.92711	-21.1593	-15.7013	-20.702	-26.6136	0	-42.648	0	-16.0255	-24.3724	4.35475	0	-9.58062	-16.7513	-30.9106	-17.3452	8.96772	8.44433	-47.2568	-38.8278	-43.241
HERVL40_2q33.1	0	0	0	0	0	0	-8.18973	0	0	0	0	0	0	0	0	0	0	1.82283	0	0	0	0	0	0	0	0	0	0	0	0	0	0	0	0	0	0	0	0	0	3.11114	0	0	0	0	0	0	0	0	0
HERVL40_3q22.2b	0	0	0	0	0	0	0	4.52792	0	0	0	1.52419	0	0	0	0	7.48625	1.54698	0	0	0.883858	6.41823	7.08131	0	0	0	7.90326	0	0	5.31628	0	0	4.87675	0	6.94841	0	6.16672	4.29057	0.0457483	1.56873	0	0	8.83611	4.73624	0	0	7.62247	6.25898	7.12601
HERVL40_4q31.3a	-4.01732	13.1472	-27.7688	-52.9349	0	9.11508	-33.6068	-53.6375	24.5461	0	-44.6394	-31.6266	-75.5279	29.2292	-27.0663	-47.6032	-114.856	24.5251	-8.12339	12.2363	-18.0641	-70.7934	-84.4842	-57.0467	-55.9135	8.06836	-103.809	-69.0083	-32.4563	-59.0543	-35.7054	-67.3092	-60.197	-3.39114	-77.092	0	-32.8863	-71.1517	5.89655	15.5636	-30.4306	-68.8568	-71.9679	-41.9444	29.3643	24.5534	-118.127	-86.3053	-89.3525
HERVL40_4q31.3b	-4.45616	15.1178	-34.3492	-65.2549	0	13.5972	-41.7659	-72.2442	25.8651	-3.41233	-55.9114	-38.1017	-94.3392	28.6434	-44.6874	-61.4412	-131.027	15.536	-10.0884	13.6863	-10.2163	-81.5711	-100.706	-73.6859	-69.2186	7.67186	-103.578	-80.8765	-38.612	-82.9812	-44.2619	-77.1974	-67.5973	-3.84858	-105.941	-6.51809	-43.6387	-93.8061	7.12497	15.176	-28.4079	-85.133	-80.116	-50.5902	33.4091	24.4035	-138.293	-112.898	-95.25
HERVL40_5q11.2	-1.64738	0	-10.2418	-12.696	0	0	-16.4417	-16.6732	0	-0.474107	-11.872	-6.09736	-19.0551	0	-11.1775	-6.629	-27.9206	3.26343	0	2.20797	-7.69539	-17.7248	-12.9292	-17.4763	-18.7722	0	-30.4171	-10.1606	-9.20472	-13.8676	-12.9193	-15.4974	-13.7797	-1.70157	-23.9831	0	-9.75414	-18.3573	0.122711	0	-11.2937	-11.6207	-21.6343	-9.94236	7.89158	5.72034	-31.1382	-22.9905	-25.1961
HERVL40_5q14.3d	1.16208e-05	0	0	0	0	0	0	0	0	0	0	0	0	0	0	0.153837	0	0	0	0.489337	2.08231	0	0	0	0	0	0	0	0	0	0	0	0	0	0	0	0	0	0	0	0	0	0	0	0	0	0	0	0
HERVL40_6q14.1	0	4.17128	0	0	0	2.8798	0	-8.02452	5.56316	0	0	-3.33294	-12.2805	7.77249	0	0	-14.296	3.40423	0	0	0	-7.15033	-10.3525	-8.80257	0	0	0	-5.8268	0	-5.92641	0	-9.20078	0	0	0	0	0	-9.45377	0	0	0	-9.37831	-8.50801	-6.71059	0	0	-13.0245	-9.35081	0
HERVL40_6q26b	0	0	0	-8.30634	0	0	0	-12.3126	0	0	-9.7167	-5.07379	-15.8771	0	-7.4086	-10.1343	-18.5173	2.67315	-5.66308	0	0	-13.3233	-16.0763	-11.2987	-11.7459	0	-16.1703	-11.9006	-5.13897	-10.2903	-8.19719	-11.9537	-10.5022	0	-18.5067	-2.76251	-8.2833	-13.8037	0	0	-7.08921	-13.125	-12.4118	-7.11279	0	0	-19.7021	-19.6257	-14.4079
HERVL40_7q21.12a	0	-1.63525	-6.67208	-5.08503	0	0	0	-9.20211	0	0	-8.57835	0	-13.088	0	-7.4373	-8.49905	-14.1674	0	0	0	0	-8.75198	-9.18402	-5.65995	-10.5272	0	-12.9882	-7.88012	-5.93719	-8.83913	-7.76629	-8.46162	-6.35368	0	-13.8315	0	0	-9.04585	0	0	0	0	0	-5.78437	0	0	-12.9953	-12.2901	0
HERVL40_7q21.12b	-3.94872	12.6468	-30.0214	-64.1516	0	20.4886	-42.5551	-54.6221	23.0597	-2.40226	-45.7043	-42.431	-85.1978	27.3127	-30.3806	-63.1083	-128.399	22.7984	-10.463	9.08643	-17.4299	-72.8195	-98.1974	-59.1219	-55.9309	10.2476	-107.185	-83.3779	-40.9421	-67.9932	-37.8091	-75.9981	-62.8098	-3.41535	-78.507	0	-39.1763	-71.3734	7.2317	11.0652	-38.7039	-77.0058	-82.5998	-45.2468	0	26.5642	-130.5	-90.5854	-89.3005
HERVL40_7q21.2	-0.0766383	0	0	0	-0.0782908	0	0	0	0	-0.0114954	0	0	0	0	0	0	0	0	-0.00166987	-0.000394362	0	0	0	0	0	0	0	0	0	0	0	0	0	-0.0775535	0	-0.0014499	0	0	0	0	0	0	0	0	0	0	0	0	0
HERVL40_9p24.1a	-2.84059	0	-9.03753	-15.8345	-3.33622	0	-13.684	-17.4393	0	0	-16.8822	-5.18702	-22.309	0	-15.8729	-14.0645	-32.6253	1.16355	0	0	0	-16.9823	-21.0583	-19.1038	-20.1474	0	-20.4671	-16.323	-6.60023	-18.612	-11.2004	-14.6624	-16.167	-2.96262	-27.4344	0	-12.133	-19.4455	0	0	-8.24767	-20.8806	-15.6253	-14.4471	0	0	-32.3782	-31.2404	-23.6264
HERVL40_9q21.32	0	0	0	0	0	0	0	0	0	0	0	0	0	0	0	0	0	0	-3.26896	0	13.4726	0	0	0	0	3.69442	21.0103	0	0	0	0	0	0	0	0	0	0	0	0	0	0	0	0	0	0	0	0	0	21.8022
HERVL40_Xp11.21b	-1.93631	0	-7.3333	-20.2288	-6.70361	0	-18.4266	-22.7566	9.16855	0	-18.3116	-4.94609	-27.8874	9.31689	-16.9784	-9.61568	-46.4173	8.0188	0	4.64647	-8.27577	-22.6743	-21.1337	-23.2908	-25.3682	0	-41.7377	-20.6719	-9.22191	-27.5797	-10.5018	-21.52	-19.1393	-1.91447	-43.9129	0	-11.777	-24.3508	0	0	0	-16.2712	-22.1715	-16.4462	11.5751	9.35573	-45.5767	-34.4571	-40.2152
HERVL66_19p12a	0	0	0	0	0	0	0	0	0	-3.03175	0	0	0	0	0	0	0	0	-2.65497	-1.04134	7.07195	6.50264	0	0	0	0	13.5051	0	-5.14398	0	0	0	0	0	0	-1.40002	0	0	0	0	0	0	0	0	0	0	0	0	11.6942
HERVL66_19p12b	0	5.00478	0	0	0	4.12684	0	0	4.47658	0	0	0	0	7.8757	0	0	-8.44077	4.80722	0	0	0	0	0	0	0	3.72743	-8.56183	-4.97287	0	-5.83209	0	-3.64009	0	0	-7.74773	0	0	0	2.37764	4.4047	0	0	0	0	0	0	-8.38425	0	-10.8338
HERVL66_19p12g	0	0	-9.62881	-26.6999	0	11.5911	-30.9102	-26.661	0	0	-23.1292	-12.9682	-32.6347	0	0	-15.8456	-56.1001	15.3422	-5.87547	0	-9.69528	-40.6248	-37.8866	-35.5393	-29.2317	7.45338	-58.6125	-31.3594	-9.39116	-28.3153	-13.7753	-33.0747	-33.4712	0	-46.4462	-7.27501	-23.1752	-42.0402	6.81437	9.81128	-18.013	-38.3198	-43.4263	-24.642	0	9.86563	-58.5389	-47.938	-56.5697
HERVL66_1q42.12	0	12.8709	0	0	0	11.0516	0	-15.3894	13.0906	-3.96749	0	0	-24.584	0	0	0	0	0	0	7.67783	0	0	0	-23.936	-15.8898	3.84797	0	-14.7983	0	0	0	0	0	0	0	0	0	-37.8901	0	0	0	0	0	0	13.558	12.8642	-21.4039	0	0
HERVL66_4p15.2	-1.02932	0	0	-11.919	0	0	-10.9818	-8.15086	0	0	0	-3.61601	-9.50554	0	0	0	-12.1592	1.92332	0	2.05946	0	0	-9.22969	-6.03259	-7.55187	0	0	-7.68498	-5.74992	-7.13581	-7.08541	-9.30197	-5.34379	0	-11.9431	0	0	-9.67782	0	0	-8.51135	0	0	0	0	4.22762	-11.765	-9.43713	0
HERVL66_5q15	-2.75461	14.6382	0	-36.4638	0	0	0	-28.2349	17.6251	0	0	-32.7703	-57.8327	22.223	0	-42.6185	-69.0868	15.6941	-8.10382	6.76312	0	-34.3945	-62.7592	-35.6868	-33.5209	10.053	-43.2748	-55.1922	-24.7439	-42.1093	0	-50.4529	-25.5109	0	-39.25	-5.11777	0	-51.3001	0	14.8682	-15.8171	-52.3073	-34.4747	0	0	7.47354	-74.3958	-51.9288	-32.4816
HERVL74_19p13.2b	-6.05144	14.735	-30.2516	-58.8259	-12.4372	17.0357	-35.0214	-57.0152	24.3118	-6.68941	-43.7827	-30.4636	-74.0423	30.4446	-28.9862	-52.7799	-118.048	18.1706	-9.98957	14.1858	-12.0188	-66.7568	-81.6474	-56.8609	-62.5912	7.3181	-88.8372	-66.1826	-33.7196	-63.2331	-38.4619	-69.8842	-57.2692	-7.92124	-82.5766	0	-36.2617	-70.8613	5.97604	16.2413	-29.1597	-66.0375	-66.6312	-41.6478	38.7023	28.8982	-113.239	-94.9055	-80.5455
HERVL74_19q13.11b	0	0	-12.7907	-32.4666	0	0	0	-25.4898	20.0968	0	-18.3648	-26.6845	-46.0124	19.7367	0	-38.8862	-59.4455	11.7697	-7.45582	11.5843	0	-30.4758	-50.9377	-23.6405	-29.6466	5.67466	-39.374	-46.6881	-25.6911	-37.171	-17.952	-43.5709	-23.6763	0	-37.4441	0	0	-32.7448	0	0	-20.5612	-36.9263	-28.0762	-17.3599	21.6655	20.3148	-63.4362	-41.3427	-32.4909
HERVL74_6p25.1	0	9.21747	0	0	0	8.5809	0	0	8.34187	0	0	-4.00728	0	6.5164	0	0	0	0	0	0	11.2349	10.3348	0	-7.06978	0	0	12.679	0	-5.05397	0	0	0	8.0549	0	0	0	0	-6.71004	2.29045	0	0	0	13.1348	0	5.30549	0	0	0	19.8201
HERVL74_7p21.2a	0	0	0	-10.4868	0	0	0	-4.9766	3.10533	0	0	0	0	0	0	0	-5.6514	3.65711	0	2.65115	-2.69731	0	-4.68616	0	-8.41889	0	0	-4.60422	-4.55034	-7.59025	-4.31489	-6.43027	0	0	-8.22141	0	0	-3.84658	2.44826	4.31754	-6.49109	0	0	0	9.15205	8.19533	0	0	0
HERVL74_7q21.3a	0	0	0	0	0	0	0	0	0	0	0	-3.23643	-5.62318	0	0	0	0	0	0	0	0	0	-4.55704	-3.14511	0	0	0	-4.21852	0	-4.27641	0	-4.5736	0	0	0	-0.280732	0	-4.49273	0	0	0	-6.36523	0	0	0	0	-5.61118	0	-2.50136
HERVP71A_10q25.1	0	0	0	0	0	0	0	0	0	-0.397744	0	0	0	0	0	5.97957	0	0	0	0	0	0	0	0	0	0	0	0	0	0	0	0	0	0	0	0	0	0	0	0	0	0	0	0	0	0	0	0	0
HERVP71A_12p13.31b	-6.2014	17.0424	-25.0724	-42.5662	-10.3198	11.4893	-29.8083	-38.8383	22.0331	-3.48115	-30.3142	0	-60.9813	15.227	-21.5532	-37.9121	-80.1094	17.3319	-4.95456	15.6535	-13.1677	-37.3234	-50.2196	-29.3331	-50.1026	5.55319	-68.6722	-38.2907	-19.6965	-37.6481	-29.1326	-39.8457	-34.9574	-4.71656	-67.4222	0	-21.7739	-42.8015	6.97762	11.1404	-15.416	-27.8073	-42.0633	-23.0607	29.8596	23.9897	-80.0424	-62.3152	-60.8597
HERVP71A_12p13.33a	0	0	-12.2148	-32.9126	0	10.5839	0	-28.3965	0	0	0	-23.1966	-39.7836	0	-25.7808	-20.326	-48.9362	0	-9.21484	0	-13.4196	-34.5245	-49.1929	-28.7748	-22.2719	0	-54.4633	-42.1743	-21.9185	-41.4595	-17.2124	-37.6366	-31.1982	0	-44.858	-8.026	0	-42.3699	1.63476	0	0	-38.1054	-42.2769	-19.2878	24.9208	14.2065	-61.6751	-45.435	-44.3394
HERVP71A_12p13.33b	-3.13396	29.604	-16.9155	-36.5439	0	17.6643	0	-37.8932	14.2413	0	0	-34.907	-64.6053	0	0	-38.4587	-74.0512	9.76102	-9.31877	0	-12.3034	-45.8824	-71.4486	-47.4187	-38.7393	11.0467	-68.6886	-61.7639	-24.5593	-56.1063	-23.394	-58.3997	-36.1755	0	-54.1952	0	0	-60.3795	2.5062	0	0	-58.1786	-48.7857	-26.127	16.6993	14.6534	-91.7283	-65.4177	-59.3931
HERVP71A_13q21.32	-2.12249	0	0	0	-8.3516	0	0	0	0	-2.48112	0	0	0	0	0	0	0	0	0	0	0	0	0	0	0	0	0	0	0	0	0	-10.3312	0	-2.48466	0	0	0	0	0	0	0	0	0	0	0	0	0	0	0
HERVP71A_15q24.2	0	0	0	-4.53957	0	2.15972	-7.3364	0	0.833388	0	0	0	0	0	0	0	0	0	0	0	0	0	0	0	0	0	0	0	0	0	0	0	0	0	0	0	0	0	0	0	0	0	0	0	0	0	0	0	0
HERVP71A_1q44b	-2.8027	3.81174	0	-6.9558	-2.40786	5.44112	0	0	4.67626	0	0	0	0	0	0	0	10.6408	0	0	0	12.6887	14.0861	0	0	0	0	25.9895	0	0	0	0	0	0	-2.70489	0	0	0	0	0	0	0	0	15.5498	0	0	0	0	0	24.9878
HERVP71A_2q33.1	0	0	0	-6.24061	0	0	-7.43491	0	0	0	0	0	0	0	0	-3.37264	0	0	0	0	0	0	0	0	0	0	0	-1.77821	-1.92284	0	0	-1.87699	0	0	0	0	0	0	0.00147788	0	0	0	0	0	0	0	0	0	0
HERVP71A_5q14.3	0	0	0	0	-11.2344	0	0	0	9.26435	-1.44674	0	0	0	0	0	0	0	0	0	5.15607	3.67892	0	0	0	0	6.98201	0	0	0	0	0	-14.6608	0	0	0	0	0	0	0	0	0	0	0	0	0	9.73285	0	0	0
HERVP71A_6p21.1a	-3.44458	20.3896	-15.953	-45.5656	0	0	-22.002	-39.0994	0	-2.69329	-29.2129	-29.62	-64.2533	0	0	-44.0336	-91.8251	18.8183	-8.041	14.585	-9.37738	-49.1157	-74.5775	-41.7518	-43.0873	14.3648	-67.4652	-64.4923	-26.8564	-48.8068	-29.3381	-57.44	-37.0649	0	-54.2457	0	-28.1711	-58.7602	10.4978	12.1039	-25.3064	-57.3381	-55.1237	-28.501	28.9298	23.5841	-94.2677	-68.6223	-56.0558
HERVP71A_6p21.1b	-4.50938	18.3767	-25.4842	-55.4082	-10.9757	0	-38.1316	-48.4766	0	-5.67983	-40.0006	-32.1062	-75.0407	0	-25.5717	-48.9838	-106.175	22.6352	-10.454	13.005	-12.3235	-60.4912	-83.7163	-51.8604	-51.201	11.363	-85.4697	-71.4027	-32.1693	-56.9756	-36.1413	-70.3678	-49.3899	-5.5091	-72.4009	-7.32863	-37.856	-67.3702	9.38681	0	-34.6031	-66.5749	-70.7827	-36.8045	24.786	22.0605	-110.488	-84.2251	-73.1239
HERVP71A_6q14.1	0	4.99077	-14.6202	-19.6394	-4.76533	10.679	-18.475	-25.4214	13.6538	-3.21513	-17.6833	-6.21417	-29.4185	14.0586	-12.6673	-13.7722	-42.762	6.5883	-5.58567	8.11534	0	-32.2926	-30.9019	-24.4565	-21.963	0	-38.7095	-19.5753	-9.57919	-18.906	-14.3275	-21.9848	-26.1487	-4.31806	-35.117	0	-19.0073	-29.4232	2.65986	0	-12.6264	-22.985	-31.8804	-23.2242	22.0752	14.7217	-37.9092	-36.3486	-34.433
HERVP71A_8q24.13	0	0	0	0	0	0	0	0	0	0	0	-4.35895	0	0	0	0	0	1.65516	-1.65411	0	6.21899	0	0	0	0	0	0	0	0	-7.79956	0	0	0	0	0	-2.08553	0	0	0	0	0	0	0	0	0	0	0	0	0
HERVP71A_Xq24	0	6.18198	0	-6.59093	0	8.67707	0	0	10.2603	0	0	-5.48464	0	8.18473	0	-8.24768	0	0	0	0	0	0	-7.64328	0	0	0	0	-7.7044	0	-5.28641	0	-5.77146	0	0	0	0	0	0	0	0	-7.23547	0	0	0	0	0	-11.492	0	0
HERVS71_11p15.4	-4.32144	11.1581	-13.9264	-24.291	-7.20484	8.35456	-23.7493	-18.4021	13.7383	-3.24154	-12.5409	-5.63566	-23.1327	11.5654	0	-14.1938	-30.6056	6.23588	0	11.5799	0	-19.441	-22.9968	-18.0338	-28.5693	4.5741	-29.5622	-14.3924	-14.5408	-19.5604	-14.4471	-25.9653	-16.2748	-7.23234	-25.4893	0	-11.3624	-23.3115	7.60987	0	-17.6508	-14.5989	-20.1689	0	24.7793	22.0198	-32.6444	-31.0425	-27.4548
HERVS71_12p13.31b	0	4.95241	0	-11.4403	-4.26848	0	0	-14.4832	4.47967	0	0	-6.47348	-18.8475	0	0	-8.25432	-28.7434	5.18447	0	0	-5.04995	-12.5356	-11.8582	-15.8578	-17.0939	0	-21.6107	-10.5252	0	-15.0693	-8.94309	-13.8659	-8.8935	0	-23.3846	0	0	-15.1978	3.7916	6.69371	0	0	-11.2349	0	0	4.79394	-24.2582	-23.3014	-22.6837
HERVS71_18q21.1	-4.01569	16.5859	0	-36.029	-15.7666	11.0344	-22.5708	-27.6449	20.7057	-3.67751	-21.5637	-17.3823	-46.809	18.4982	0	-26.941	-70.3556	17.0353	-16.6281	0	0	-36.4205	-48.5878	-37.6596	-29.6591	11.9529	-46.9099	-41.6735	-16.3078	-33.7815	0	-47.6708	-31.6158	-3.76799	-38.4481	-11.1967	-18.1032	-46.7157	11.142	14.4412	-14.8161	-38.5931	-36.0605	-19.1724	23.331	19.3071	-63.3603	-44.3462	-44.8982
HERVS71_19p12b	0.528387	0	0	0	0.591187	0	0	0	0	0.468913	0	0	0	0	0	0	0	0	0	0	-2.52741	0	0	0	0	0	0	0	0	0	0	0	0	0.56291	0	0	0	0	0	2.15309	-0.293971	-0.433252	0	0	0	0	0	0	-4.84624
HERVS71_19p13.3	-5.03417	17.4074	-16.5545	-42.199	-11.6004	12.3906	-22.8189	-46.0422	28.7566	-2.78963	-38.1862	-35.218	-75.4272	21.7811	-22.9227	-42.6633	-95.3437	19.798	-10.4541	12.0146	0	-47.7309	-74.9236	-64.4801	-47.3742	11.3216	-72.0514	-67.0346	-30.4349	-60.6751	-18.8097	-68.1165	-49.7275	-3.8053	-63.3317	-7.49937	-28.7414	-76.451	7.84472	15.31	-18.8351	-80.2336	-50.6611	-32.8705	24.5778	24.3124	-103.93	-75.002	-64.3974
HERVS71_19q13.12a	-5.1473	11.6102	0	-25.6621	0	14.1591	0	-15.6701	16.0045	-3.60198	0	-8.34267	-30.2207	0	0	-18.8827	-35.8373	16.5126	-8.44765	0	6.158	-13.3167	-27.0555	-19.5654	-17.9858	10.6593	0	-24.2806	-11.6908	-16.1903	0	-28.5929	0	0	-25.4731	-5.08809	0	-27.5507	7.48583	15.1328	-12.2668	-19.9628	0	0	13.8271	13.7133	-36.0158	-29.0682	0
HERVS71_1p35.1	0	0	0	-12.1084	0	0	0	-10.2688	0	0	0	-5.30129	-14.5625	0	0	-10.1929	-19.6707	0	0	5.9289	3.79657	0	-15.6152	-7.86079	-8.56517	3.32385	0	-14.5918	0	-11.4169	0	-9.07799	0	0	-13.724	0	0	-12.6667	0	0	0	-10.6939	0	0	0	10.0185	-15.2102	-17.8525	-11.3503
HERVS71_3p12.3	-4.10483	0	-21.0018	-34.9546	0	9.84194	-28.0125	-34.7856	10.4753	-3.25127	-29.4978	-10.5617	-44.6313	11.1806	-20.7928	-23.2405	-66.5875	14	-8.21663	8.03002	-10.0693	-37.1652	-43.4673	-32.7431	-33.3584	0	-51.1176	-34.226	-19.4881	-34.0706	-21.2129	-35.8658	-37.0568	-3.43441	-48.0757	-4.66159	-20.0097	-44.9178	5.8082	0	-14.9445	-37.5627	-38.7171	-25.4692	24.7617	19.7878	-55.8913	-47.5269	-45.0769
HERVS71_4p16.1b	-6.27233	15.4399	-20.4112	-50.5722	0	9.46037	-27.4	-45.7709	24.9676	-4.72386	-33.2753	-17.1895	-60.9937	28.1985	-24.0632	-45.0429	-99.7403	23.8762	-12.0108	14.874	-15.4376	-55.5364	-70.5512	-46.0971	-57.0456	10.6241	-86.2872	-55.5367	-23.7867	-48.3014	-28.6602	-52.9672	-48.3476	-7.83791	-66.6643	-6.77327	-32.1944	-58.6074	10.0037	13.8242	-24.4295	-46.8818	-60.8499	-30.7438	31.7553	28.6981	-96.18	-75.719	-84.2066
HERVS71_5q15	0	0	0	0	0	0	0	0	0	0	0	0	0	0	0	0	0	0	0	0	4.24002	0	0	0	0	0	0	0	0	0	0	0	3.18391	0	0	0	0	0	0	0	0	0	5.46301	0	0	0	0	0	0
HERVS71_7q33	0	0	-4.50279	0	0	0	-5.43495	-6.4043	9.10967	0	0	0	0	12.399	0	0	0	3.91517	1.89743	0	0	-8.94879	-7.17289	-5.67127	-6.83076	0	0	0	0	0	0	0	0	0	0	0	0	-7.51794	0	0	-7.51834	0	0	-5.3131	0	0	0	0	0
HERVS71_8p23.1a	0	0	0	-14.9729	0	0	-11.7865	-10.6107	0	0	-11.2227	0	-16.5704	0	-9.48069	-9.30737	-18.1105	0	0	1.97043	-4.2023	-10.012	-12.8653	-7.18987	-8.31515	0	-12.4947	-11.4691	-7.05435	-11.32	-7.49709	-10.5604	-8.7136	0	-18.4091	0	-7.7065	-12.6184	2.51575	0	0	-8.25685	-12.2127	-6.81799	0	5.28847	-14.8381	-16.7236	-12.8956
HERVW_11p14.2	0	0	0	0	0	0	0	0	0	0	0	0	0	0	0	0	0	0	-0.557591	-0.430634	0	0	0	0	0	0	0	0	0	0	0	0	0	0	0	-2.75143	0	0	0	0	0	0	0	0	0	0	0	0	0
HERVW_12p13.1	0	0	0	0	0	-0.959704	0	-11.4633	0	0	0	0	0	0	-7.31019	0	0	0	0	0	-2.98754	0	0	-13.8835	-8.89479	0	-19.4655	0	0	-10.035	0	0	-9.14627	0	-14.8455	0	-6.78989	-18.8173	0	0	0	-10.235	-12.0556	0	0	0	-16.2123	-13.8439	-15.4093
HERVW_13q21.1	0	0	0	0	-8.98062	0	0	0	0	0	0	0	-15.6034	0	0	-8.81505	-16.2151	0	-1.59169	0	0	0	-11.8555	-12.7884	0	4.37852	0	-7.83538	0	0	0	-14.4874	-8.10179	0	0	0	0	-10.936	0	0	0	-13.8563	0	0	0	0	0	0	0
HERVW_14q21.2	-1.22238	0	-19.1426	-27.3749	0	0	-35.0157	-34.0271	5.27344	0	-27.5811	-8.70884	-44.0769	6.05451	-25.5645	-22.628	-61.2953	5.82746	0	8.39693	-16.8972	-36.1277	-35.3094	-32.1995	-36.6945	0	-62.8794	-27.1776	-15.1318	-28.9343	-24.735	-32.7818	-31.0886	0	-47.6979	0	-19.2027	-34.5193	0	0	-22.8844	-23.4179	-41.1344	-21.5869	12.3795	17.8837	-65.1858	-46.4297	-58.774
HERVW_15q21.2	0	2.82192	-9.02166	-14.4167	0	6.78899	-8.91562	-14.9947	3.96213	0	-12.0994	-7.73066	-20.7848	0	-9.89191	-13.4934	-28.8335	0	0	3.28362	0	-18.484	-22.5396	-13.1781	-14.1683	0	-18.7211	-19.0994	-9.87245	-14.37	-12.0718	-16.4477	-13.3376	0	-24.6	0	-9.15226	-18.5597	0	0	-7.03417	-13.8081	-19.8949	-11.7349	0	9.38336	-25.6485	-21.6933	-16.763
HERVW_19p12d	0	0	-7.65922	-10.5349	0	0	-11.1071	-9.14551	6.54294	0	0	0	-10.7005	4.60008	-8.89658	-5.81083	-17.6049	3.96176	-1.04081	7.87374	0	-11.7211	-9.54838	-8.7419	-12.8368	0	-15.7575	-7.15859	-5.33212	-10.3605	-8.38284	-8.95617	-9.10255	0	-16.4349	0	0	-10.3215	0	0	-5.76301	0	-10.9103	-8.9746	12.7065	11.3235	-14.7433	-10.2146	-12.519
HERVW_1p33b	-4.75698	12.6062	0	-40.9688	-10.2869	0	0	-25.8204	18.4267	-2.93753	0	-14.2474	-48.8624	19.808	0	-31.9756	-57.4329	21.4447	-14.7697	0	0	-25.1514	-50.8178	-26.74	-26.5817	12.7784	-39.1311	-45.2771	-24.3883	-32.4394	-16.2777	-47.1252	-29.0354	0	-42.9134	-12.5099	-25.985	-38.9707	11.5881	13.0308	-18.3598	-30.4301	-29.3288	0	24.1444	28.8929	-65.4497	-48.7822	0
HERVW_1p33c	-5.32414	19.6823	-20.2139	-56.152	-14.8643	19.0009	-29.6444	-40.9081	22.1299	-5.13892	-28.6941	-29.1394	-67.5482	21.4858	0	-43.0354	-85.9813	25.1729	-15.3314	0	0	-43.9552	-73.9636	-42.9233	-42.8128	13.1417	-65.7418	-67.3215	-35.4316	-49.8393	-21.5947	-64.4027	-43.8901	-6.39616	-59.0963	-13.1469	-31.688	-60.0345	13.1946	14.3571	-27.2085	-55.2991	-47.564	-26.1398	26.3154	28.997	-93.2511	-67.3002	-55.661
HERVW_21q21.1	-1.79419	0	0	0	-11.8649	0	0	0	0	0	0	0	-11.6524	0	0	0	0	0	0	0	0	0	0	-7.99934	0	4.679	0	0	0	0	0	-14.0413	0	0	0	0	0	-8.60277	0	0	0	-9.32537	0	0	0	0	0	0	0
HERVW_2q12.2	0	0	-4.80829	-10.4123	0	0	-11.6353	-7.31258	6.63804	0	-6.82467	0	-7.51124	5.94983	0	-4.66381	-17.829	0.775368	0	0	-9.02987	-11.6431	-8.36599	-5.78847	-9.4455	0	-23.0823	-6.03675	0	-7.06152	-5.5305	-6.96496	-9.26011	0	-10.3263	0	-5.74663	-7.54298	0	0	-6.87235	-6.42604	-14.9499	-6.40233	0	0	-16.7252	-9.76365	-21.8125
HERVW_3p11.1	0	2.75167	0	0	0	0	0	0	3.73808	0	0	0	0	0	0	0	0	3.81413	0	1.09721	0	0	0	0	0	0	0	0	0	0	0	0	0	0	0	0	0	0	2.36743	0	0	0	0	0	4.30299	0	0	0	0
HERVW_3p24.3	-4.96089	22.7451	-15.2293	-45.319	0	18.0488	-26.411	-39.4915	25.1919	-7.19015	-26.5834	-33.2035	-63.9126	31.9523	0	-43.834	-91.352	26.7973	-11.1857	0	0	-55.8077	-76.3323	-46.7201	-43.5314	17.7703	-72.3762	-70.3878	-25.1653	-51.5632	-21.9835	-66.7359	-48.2761	-6.11859	-57.7455	-8.54029	-27.9391	-62.2694	14.3509	19.9117	-20.7407	-66.0136	-57.2865	-30.9367	0	27.1822	-100.865	-75.8415	-62.6057
HERVW_3q25.1a	0	13.2174	0	-17.848	0	7.35783	0	0	0	-3.15157	0	-18.7764	-25.1481	0	0	-19.5163	-34.5255	0	-6.79504	0	0	-23.8628	-36.1556	0	0	7.47718	0	-31.8643	0	-22.8976	0	-27.9151	0	-3.04701	0	0	0	0	5.40081	15.5268	0	-29.2915	0	0	0	9.72779	-38.5046	0	0
HERVW_4q21.22	-4.95635	0	0	-8.97952	-4.86654	0	0	0	0	-3.39028	0	0	-12.056	0	0	0	0	0	-2.08636	0	6.82868	0	0	-11.6057	0	0	0	-7.55072	0	-11.8329	0	-11.1233	0	-4.61267	0	0	0	0	0	0	0	0	0	0	0	0	0	-14.5203	0
HERVW_5p13.2a	-2.16217	0	-10.2064	-18.3566	0	6.87435	-26.4655	-17.7264	0	-1.10443	-13.3463	0	-28.4852	0	-11.3009	-9.88081	-35.8666	3.57431	0	2.53017	-9.07487	-18.9055	-18.106	-23.3704	-19.9338	3.35183	-34.7705	-15.829	-10.1041	-21.1685	-11.3424	-21.2105	-20.8666	0	-34.6511	0	-9.66387	-17.3469	0	8.98452	-11.6364	-15.5474	-21.1347	-14.669	0	7.2691	-39.9271	-33.737	-32.0503
HERVW_5p14.3	0	0	-9.16905	0	-5.61246	0	-10.1269	-23.8517	0	0	-12.8006	0	-19.3742	0	-12.6927	0	-27.5349	0	0	0	0	-17.6529	-14.796	-29.316	-23.8939	0	-27.269	-6.62312	-5.30274	-18.003	-10.1514	-15.8914	-18.3896	0	-24.9241	0	-13.7374	-31.8841	0	0	-7.1771	-20.6297	-15.9612	-15.0694	0	0	-31.7056	-29.0946	-23.1546
HERVW_5q12.1	-0.136404	0	7.86453	0	0	0	0	0	0	0	0	0	0	0	9.81582	0	0	0	0	0	0	0	0	0	0	0	0	0	4.78795	0	0	0	0	0	0	0.799611	5.08241	0	0	0	0	0	0	0	0	0	0	0	0
HERVW_6p23	-1.52766	0	0	0	0	0	0	-8.57977	0	-1.6197	0	-6.10454	-9.6847	0	0	0	-12.7445	0	0	1.58023	0	0	-8.1919	-13.0829	-6.40004	0	-10.1433	-5.70749	0	0	-6.90385	-6.94706	-6.32738	-1.13095	-8.80133	0	0	-12.7899	0	0	-6.04165	-13.7942	-10.8035	-6.58271	0	3.42305	-10.1729	-14.6257	0
HERVW_6p25.3	0	17.3568	-15.3349	-31.0636	0	18.7253	0	-35.8697	23.6391	-2.39094	-28.8189	-22.2581	-47.2983	26.4515	0	-30.3937	-73.3257	13.8908	-9.00706	10.0612	0	-48.721	-54.4738	-40.9525	-32.7152	10.4932	-62.9767	-45.7582	-15.367	-37.9661	-19.8236	-45.1406	-37.4303	0	-52.9658	0	-30.03	-52.3584	6.14238	13.6004	-13.8737	-52.5957	-49.1345	-30.3867	23.2548	19.2662	-70.6126	-59.5348	-54.8827
HERVW_6q14.3a	0	0	0	-2.24736	0	0	0	0	-0.335538	0	0	0	0	0	0	0	0	0	0	0	0	0	0	0	0	0	0	0	-2.56918	0	0	0	0	0	0	0	0	0	0	0	0	0	0	0	0	0	0	0	0
HERVW_6q22.1	0	0	0	-8.08414	-6.25265	0	-9.32548	-15.8496	0	0	-11.641	-6.24503	-13.489	0	-11.0617	-6.46777	-20.4004	0	-2.60233	0	0	-14.1643	-12.884	-16.8505	-12.6926	0	-21.7746	-8.73872	-5.14447	-13.8103	0	-11.3574	-13.6625	0	-20.8732	-1.75082	-9.79627	-20.4024	0	0	0	-16.6736	-15.8823	-12.8007	0	0	-25.6833	-23.3488	-17.6773
HERVW_6q23.3a	-0.255551	0	3.19582	0	-2.44742	0	3.74294	5.91192	0	-1.30191	0	2.14767	4.25524	0	0	2.2781	6.45755	0	0	0	0	0	5.20389	0	4.03166	0	0	2.52111	0	0	3.90049	0	0	-2.03811	0	0	0	6.40606	0	0	3.14452	5.79788	5.61162	0	0	0	6.60366	8.20537	0
HERVW_6q24.2b	0	8.18547	-22.4811	-49.2128	0	7.02976	-29.347	-46.5468	15.183	-1.74894	-36.3339	-28.19	-67.1936	0	-20.7086	-46.1106	-96.4561	0	-7.50231	0	-10.9702	-57.1625	-76.1818	-44.3134	-43.3363	0	-78.6637	-59.4127	-29.585	-48.3515	-30.4078	-52.1955	-42.9821	0	-63.8602	0	-31.9122	-59.3863	6.92545	10.1577	-24.4396	-63.5037	-60.0211	-35.4032	0	21.9015	-95.8453	-71.5563	-70.3281
HERVW_6q27a	0	0	0	0	0	0	0	0	0	0	0	-8.54633	-13.4122	0	0	0	0	0	-5.16461	0	0	-12.0509	-15.6969	0	0	0	0	-14.8806	0	-10.9396	0	-15.461	0	0	0	0	0	0	0	0	0	-15.7018	0	0	0	0	-16.8012	0	0
HERVW_7q21.2	-5.04466	7.39971	-28.8331	-60.5576	-9.52378	16.3223	-42.6217	-59.2397	23.738	-3.44417	-45.2337	-34.4692	-83.3902	26.8833	-32.4391	-55.3553	-128.809	21.0964	-9.64451	13.4818	-20.3297	-76.4001	-89.2068	-62.6259	-66.0571	10.949	-108.903	-75.9335	-33.462	-65.4815	-38.2343	-72.4984	-63.7697	-4.10863	-86.007	-7.35937	-39.4189	-76.1093	6.31363	17.5561	-38.3901	-71.3053	-73.1382	-42.8922	33.8592	27.0079	-129.245	-94.9012	-99.9071
HERVW_Xq22.3c	-5.06908	14.8155	-18.9502	-39.7593	-10.7047	0	0	-38.1301	17.5229	-3.17331	-28.0496	-14.6747	-57.6447	19.7583	-16.3903	-35.3402	-71.3126	17.5871	-6.73504	11.5541	0	-32.2735	-50.0549	-31.452	-42.9183	10.8536	-51.2392	-45.6182	-25.0449	-40.3046	-26.7986	-45.0817	-31.6859	0	-61.8064	-7.13394	-20.7306	-46.2601	12.3627	14.1043	0	-35.3083	-37.0006	-16.2158	25.3629	22.7659	-70.4995	-68.5498	-47.7975
HML1_10p15.1	0	17.626	0	0	0	13.7174	0	0	23.5252	-3.32608	0	-9.32098	-15.5981	23.4572	0	0	0	6.70794	0	0	0	0	-12.2249	-12.6282	0	4.37482	0	-16.489	0	0	0	-10.8888	0	0	0	0	0	-18.2547	5.97463	0	0	-18.3607	0	0	15.0916	0	0	0	0
HML1_11q13.4	0	6.32686	0	-14.934	0	0	-17.223	-13.1301	5.28149	0	-11.08	0	-14.677	0	0	-10.7962	-19.8383	0	-1.51861	8.78588	0	-10.0079	-13.1846	-10.9261	-12.1466	0	-23.9747	-10.1774	0	-9.78554	-10.8692	-11.1494	-8.93103	0	-17.2147	0	0	-18.7421	0	0	0	0	-17.7219	0	14.7758	15.6128	-19.1445	-17.9191	-16.0242
HML1_12q13.11	-0.0558372	0	0	-4.63147	0	0	0	-3.72883	0	0	0	0	0	0	0	0	-6.26713	0	0	0	0	0	-5.8233	-1.54583	-5.37714	0.711779	0	-5.24079	-3.97886	-5.21761	-5.0494	-5.44234	0	0	0	0	0	-4.95225	0	0	0	0	-4.25904	0	3.92185	5.74575	0	0	0
HML1_15q21.2	0	6.28562	0	0	0	9.55961	0	-13.3437	13.2048	0	0	-9.10089	-15.1221	14.1086	0	0	-18.7781	0	0	0	0	0	-13.901	-21.1177	-13.3648	0	-19.8477	-10.9491	-7.03104	-15.3026	0	-15.1376	-9.96362	0	0	0	0	-26.133	0	0	0	-14.993	-13.2323	-11.3854	0	0	-24.1193	-13.116	-14.0704
HML1_1q23.3	0	3.73346	0	-12.5849	0	4.69779	-11.3264	-8.75177	3.44748	-1.67991	0	0	-15.5839	6.73608	0	0	-21.4326	3.33715	0	0	0	-8.73651	-11.1222	-11.2056	-9.14765	2.78678	-15.316	-12.249	0	-10.0085	0	-8.52211	-9.05348	0	-16.3683	0	0	-13.6104	2.4014	0	0	-11.9263	-10.8144	-8.08971	0	0	-19.0926	-17.0645	-13.5785
HML1_2p11.2	-3.466	0	0	-28.4141	0	0	0	-14.7857	0	-2.35173	0	0	-19.1293	0	0	-23.0796	0	0	0	9.37571	20.5456	0	-20.9594	0	0	6.03676	28.6188	-25.3653	-18.3628	0	-12.0655	-18.086	0	0	0	0	0	-20.3873	0	0	0	0	0	0	13.2252	13.4832	0	0	31.0704
HML1_3q26.31b	0	0	-7.18763	-12.6504	0	0	0	0	0	-1.95052	0	0	0	0	0	-8.70201	0	0	0	0	8.08591	8.11424	0	0	0	0	0	-7.09519	-6.78385	0	0	0	0	0	0	0	0	0	0.299012	0	0	0	0	7.39069	0	0	0	0	13.0478
HML1_6q22.32	-4.79778	9.21173	-25.2794	-58.8859	0	0	-32.7083	-50.8593	14.9502	-2.11917	-34.3156	-28.3494	-73.1691	23.0192	-30.1685	-57.1725	-114.764	8.59737	-7.48683	10.6127	-8.7924	-59.5054	-80.6124	-46.345	-53.6879	6.28583	-81.7032	-72.0952	-32.042	-59.0686	-32.6726	-57.6168	-51.7978	-4.23751	-78.0778	0	-34.6908	-66.5069	7.3494	0	-27.0252	-60.0778	-59.6228	-33.7745	31.4624	18.6709	-107.935	-87.9545	-70.4884
HML1_6q27a	0	1.77375	0	0	0	0	0	0	0	0	0	0	0	0	0	0	0	3.14218	0	0	0	0	0	0	0	0	0	0	0	0	0	-9.15013	0	0	0	0	0	0	0	0	0	-11.824	0	0	0	0	0	0	0
HML1_Xq24	-3.70129	0	-13.9479	-24.4969	-7.09693	0	-17.8687	-22.2278	6.6621	-1.31995	-18.1438	-4.8566	-26.1906	0	-16.962	-15.4218	-32.5171	7.08169	-3.57592	6.91827	-5.87205	-21.4016	-26.1084	-14.77	-20.3086	0	-22.1323	-22.4151	-12.2449	-21.8535	-19.3861	-21.7805	-16.4226	-2.41606	-35.975	0	-11.1358	-25.1874	0	0	0	-14.208	-24.1648	-13.7576	0	13.6352	-27.8462	-32.5733	-19.8788
HML2_10p14	0	0	-10.6339	-23.4061	-6.09847	0	-16.9437	-26.6161	5.92033	0	-16.9783	-16.1822	-27.1785	0	-18.0525	-17.8112	-36.4701	0	0	0	8.16436	0	-25.8489	-27.4738	-21.9939	0	0	-23.1121	-13.6447	-23.2546	-14.6269	-23.7361	-15.1984	0	-27.9977	0	-17.75	-30.6398	0	0	-14.6866	-26.2849	0	-14.5793	0	0	-36.939	-40.7122	0
HML2_10q24.2	0	0	-7.98452	-15.0052	0	9.47746	0	-13.1085	0	0	0	0	-11.1097	0	0	-12.9477	-15.3514	0	0	0	3.89952	-11.6253	-13.3109	-13.9791	-10.958	5.41017	0	-10.3512	0	-9.90429	0	-10.8767	-12.4212	0	-19.0835	0	0	-17.1242	0	0	-7.25574	0	0	0	0	0	0	-15.353	0
HML2_11p15.4a	-6.28229	20.8529	-22.9252	-51.9081	-13.0567	10.3239	-32.1198	-47.198	25.8668	-6.57172	-38.7076	-23.7593	-65.8734	29.7748	-24.8493	-48.06	-98.6284	19.6687	-10.9649	18.1375	-15.4222	-61.4044	-69.828	-46.9795	-56.9618	8.86917	-83.8649	-60.2129	-28.0751	-54.3879	-32.6791	-62.4583	-48.6599	-7.99088	-72.1623	-5.75439	-31.4704	-60.5221	10.8417	10.7625	-31.5278	-53.6067	-61.3837	-33.3361	37.9421	31.4421	-95.2696	-81.3188	-79.6754
HML2_11q12.3a	-2.40069	0	-8.37185	-9.54783	-3.07739	0	-14.2791	-13.4321	0	-2.67544	-15.0028	-4.0203	-20.6106	0	-8.80128	-11.8478	-28.6851	2.0512	0	0	-9.56196	-16.4654	-16.225	-11.962	-18.1142	0	-29.9876	-13.1263	-7.86844	-16.3065	-12.9591	-19.0237	-13.5756	-2.20002	-22.3924	0	-10.6308	-13.6671	0	0	-8.37768	-9.5088	-18.4767	-8.58443	0	0	-31.2765	-23.4232	-26.9095
HML2_11q12.3b	0	0	-7.87261	-10.6465	0	0	-14.2569	-14.6114	0	-1.7794	-17.6115	0	-19.2087	0	-9.0041	-10.1033	-35.0993	1.82298	0	0	-12.7435	-21.6126	-17.3252	-12.3596	-19.0758	0	-39.5675	-12.2213	-5.81591	-15.3531	-11.2767	-14.7599	-15.7949	0	-25.6204	0	-10.945	-14.6531	0	4.99998	-6.98042	-11.8966	-24.425	-11.3954	0	0	-35.1173	-26.9509	-36.4378
HML2_11q23.3	-4.29593	0	-15.6752	-28.1801	0	11.3346	-23.2161	-21.061	13.9721	-2.94929	0	0	-31.9192	0	0	-22.0501	-25.0203	12.9216	-6.13432	10.4204	0	0	-23.1367	-13.4411	-19.581	5.20255	0	-19.095	-13.3478	-15.4873	-18.13	-23.6882	0	0	-34.6643	-4.88012	-17.9736	-26.4401	0	0	0	-15.9224	0	0	16.812	18.2885	-23.5675	-32.5978	0
HML2_12q14.1	0	0	-0.0351557	0	0	0	0	-0.0562386	0	0	-0.0638058	0	-3.48494	0	-0.0417332	-1.89653	0	0	0	0	0.000670551	0	0	0	0	0	0	0	0	0	0	-0.344163	0	0	0	0	-0.0533289	-0.0457792	-1.14623e-06	0	-0.154349	-0.28407	-0.663067	0	0	0	-1.57321	-0.594773	0
HML2_14q11.2	-2.45467	0	-8.82056	0	-3.52846	0	-12.2028	-12.3175	0	-1.25616	-11.9298	0	-17.533	0	-11.153	0	-16.5163	0	-1.15259	0	0	-11.2946	-9.50871	-24.7194	-13.7016	0	-24.9519	0	0	-9.6039	-7.31655	-15.2111	-12.3288	-2.15116	-21.3717	0	0	-18.2315	0	0	-10.5872	-14.4441	-11.1465	-10.6852	0	0	-20.5523	-18.7904	-17.8254
HML2_14q32.33	-3.47613	0	-11.8359	-18.7557	-5.33016	0	-12.4132	-25.6704	12.4303	0	-16.7621	-11.5845	-27.536	12.3626	-17.8869	-15.6441	-42.3304	6.39286	0	6.77755	-5.86762	-28.6272	-28.0302	-31.9141	-30.7283	0	-40.0665	-21.3371	-13.5454	-27.9858	-13.977	-27.717	-24.6482	-3.16335	-36.6307	0	0	-33.7539	1.37158	0	-14.0575	-25.8331	-25.9084	-18.7956	0	6.57136	-44.2948	-40.9079	-34.6082
HML2_17p13.1	-3.22486	7.53843	0	0	0	0	0	0	13.3382	-5.78789	0	0	0	0	0	0	0	0	0	6.05752	8.91253	0	0	0	0	6.72766	0	0	0	0	0	0	0	0	0	0	0	0	0	0	0	0	16.3052	0	16.418	11.8111	0	0	17.379
HML2_1q21.3	-2.41277	9.62374	-8.20663	-16.5521	0	4.99319	-24.2832	-16.6069	12.7019	0	-15.332	0	-24.5846	9.33969	-10.4089	-10.3138	-28.3976	10.1538	0	0	-4.45496	-13.7712	-13.3766	-21.2357	-19.4986	3.29007	-30.3959	-9.89264	-7.59523	-15.1698	-12.3674	-19.1517	-12.2042	-1.88255	-25.9006	0	0	-18.989	0	6.60724	-10.7294	-13.5514	-15.0868	-8.58428	0	0	-32.1573	-28.1474	-24.7787
HML2_1q22	-3.0945	0	-11.9555	-19.0532	0	0	-25.2178	-33.986	0	-2.11406	-24.8833	0	-36.0083	0	-24.6002	-12.694	-40.8963	4.21006	0	0	0	-20.9882	-23.6825	-45.5845	-32.3273	0	-35.4058	-16.4685	-10.8706	-31.3626	-14.7144	-23.4753	-26.3733	-3.12206	-47.4869	0	-21.9014	-48.1289	0	0	0	-31.6263	-23.743	-23.9369	0	0	-49.1472	-48.2554	-35.0876
HML2_21q21.1	-1.2586	0	0	0	-10.2874	0	0	0	0	-1.29492	0	0	0	0	0	0	0	0	0	0	3.26683	0	0	-7.32027	0	5.26008	0	0	0	0	0	-8.88498	0	0	0	0	0	0	0	8.19256	0	0	0	0	0	0	0	0	0
HML2_22q11.23	-4.58371	8.09593	-17.8922	-32.6056	0	0	0	-33.3799	16.9729	-4.00147	-24.575	-16.5133	-42.857	16.1222	0	-37.3266	-69.7511	13.9113	-8.71908	13.4242	-13.734	-43.4847	-48.026	-31.2003	-42.8855	9.43493	-62.7162	-40.7161	-20.4406	-34.0623	-23.8582	-41.5622	-34.7346	-5.81954	-53.4037	0	-22.9089	-43.2766	6.62413	13.7246	-17.4137	-33.5827	-44.3949	-17.2014	23.5197	21.4343	-69.9946	-55.5768	-62.4675
HML2_3p12.3	-5.43613	31.6715	-23.0141	-55.1784	-15.3138	28.5902	-27.4798	-47.1267	38.2296	-6.9829	-37.0069	-31.7742	-75.1131	40.9095	-22.6103	-48.5503	-105.247	28.8955	-12.8741	0	-10.735	-65.9469	-84.2156	-53.5665	-51.5345	16.0998	-85.7906	-74.0308	-27.7965	-62.6383	-27.6448	-74.4349	-53.5216	-6.73467	-72.3746	-8.5598	-29.5801	-71.8902	12.5989	18.9994	-26.7171	-65.4737	-60.4213	-34.9364	28.8876	28.8641	-111.199	-88.5857	-76.0156
HML2_3p25.3	-2.3888	0	-11.5637	-25.2965	0	0	-20.6306	-23.4331	18.5344	0	-15.782	-8.52348	-28.4196	17.7664	-13.2025	-17.688	-37.0209	8.94004	-6.88331	7.85212	0	-19.9888	-24.8954	-17.8895	-23.0237	0	-20.732	-20.8537	-12.0251	-19.4784	-15.9028	-17.3944	-15.4927	0	-29.5338	0	-15.4142	-24.2864	2.38011	0	-11.7331	-16.6785	-17.9729	-11.3136	14.5992	11.3183	-31.745	-26.8419	-20.0248
HML2_3q27.2	-0.426676	0	0	-4.47018	0	0	0	-4.78383	0	0	-5.35574	0	-9.22425	-1.88593	0	-3.50951	-12.1272	0	0	0	-6.03662	-5.5689	-4.78856	-6.49208	-6.58991	0	-14.8247	-4.74998	-3.06929	-8.50191	0	-7.95162	-3.92484	0	-12.6526	0	-4.27057	-5.27026	0	0	0	-5.14969	-6.4527	0	0	0	-15.6825	-9.75002	-13.0643
HML2_4p16.1a	-4.23744	0	0	-25.1961	0	12.2647	0	-25.2115	16.2367	-3.12575	-21.6382	-22.8749	-53.277	0	0	-37.2614	-58.7379	18.7309	-12.2031	9.79515	0	-32.1858	-54.6014	-28.5554	-28.0934	12.2206	-43.7127	-47.2868	-22.9896	-35.0988	-17.3832	-51.0481	-28.2235	0	-33.5109	-8.32933	0	-37.2389	7.06114	17.9138	-13.9918	-42.7451	-33.3837	-17.1481	0	22.7286	-67.3473	-41.3536	-39.5779
HML2_4p16.1b	-6.76585	24.6229	-24.9841	-63.6659	-10.26	13.4128	-32.678	-49.3749	30.6116	-4.82261	-38.1072	-35.7789	-80.3473	33.8022	-24.6414	-57.1921	-107.833	28.5295	-13.475	13.5037	-17.0265	-67.6122	-93.4853	-54.1741	-59.6716	13.9552	-99.3082	-80.7962	-38.6595	-69.3951	-35.8715	-78.0063	-56.3256	-7.99052	-80.3886	-9.49684	-37.2194	-66.6782	13.0746	14.858	-29.4491	-67.2651	-70.852	-33.5223	32.7009	36.5998	-123.543	-91.8777	-86.8968
HML2_6p21.1	0	0	0	0	0	0	0	-3.65185	0	0	0	-1.23453	0	0	0	0	0	0	0	0	0	-5.70628	-4.19245	-4.28886	-4.18973	0	-7.38514	-2.53934	0	-3.36002	-2.28016	-3.23619	-4.22054	0	-4.87982	0	0	-4.06664	0	0	0	0	0	-4.06722	0	0	-6.14492	0	0
HML2_6q25.1	0	20.8344	-21.4556	-48.4542	-12.6298	9.60883	-28.286	-46.8215	20.8858	-3.79949	-40.6686	-28.3279	-66.5371	24.0804	-23.0267	-43.6178	-87.6542	9.848	-10.2554	9.32177	0	-62.2632	-71.4364	-53.6896	-50.7539	0	-77.6024	-59.3661	-28.9907	-63.7884	-27.5071	-62.8471	-52.7557	-7.04238	-77.3709	-7.09549	-35.3746	-63.594	7.22841	14.1413	-21.323	-66.9299	-52.1592	-38.3755	29.1505	18.3153	-100.638	-89.6045	-67.5233
HML2_7p22.1	0	-2.5975	0	-1.2533	0	-2.54237	-1.54154	0	-3.21856	0	0	0	-2.04571	0	0	0	-2.61621	0	0.209339	1.82256	0	0	-1.88743	0	0	0	-2.23355	-1.82554	0	-2.46948	0	0	-1.38259	0	-1.97054	0.276284	-1.58929	0	0	0	0	0	-1.47938	-1.3762	2.01393	0	-2.32271	-4.14978	-1.39981
HML2_7q11.21	-3.87255	10.2586	-14.0721	-36.7839	0	0	-23.6471	-30.1056	20.4004	-2.8055	-25.0377	-15.5863	-51.4355	19.126	0	-30.6434	-51.9677	17.0838	-12.1423	11.5706	0	-32.3944	-52.4295	-30.5482	-29.3905	8.55702	-35.2139	-45.6955	-21.977	-38.8149	-20.2948	-44.8855	-30.8173	0	-45.6239	-8.43629	-19.4887	-41.7004	9.58427	11.9329	0	-35.3901	-27.7759	-22.6082	22.6955	22.1556	-55.0321	-50.3084	0
HML2_7q22.2	-3.22683	0	-16.6318	-32.0409	0	0	-19.3274	-36.4943	0	-2.065	-29.005	-13.8551	-45.6184	9.43247	-17.6871	-34.0106	-68.6339	0	0	8.79612	-10.9695	-44.6896	-50.6496	-33.8317	-40.7443	8.25175	-60.0932	-40.6604	-18.3506	-38.0586	-26.1096	-41.1103	-35.5446	-2.01863	-54.1007	-4.25685	-25.6564	-45.9537	0	11.3069	-16.1988	-36.6494	-44.4483	-26.0513	22.9181	18.7929	-67.2753	-58.2451	-58.6552
HML2_7q34	0	0	-10.0094	-16.2443	0	0	-23.6212	-18.8433	0	0	-14.078	-7.69415	-20.4385	0	-12.8023	-9.16609	-36.3822	2.48781	0	2.45373	-13.5958	-25.5362	-16.4341	-19.8383	-24.6371	0	-45.9378	-12.9535	-6.94778	-17.3224	-14.6356	-18.3191	-18.3836	0	-30.8732	0	-9.99968	-19.4432	0	0	-15.5775	-15.2276	-29.0001	-12.9496	8.44593	4.71277	-37.6364	-28.0117	-41.8218
HML2_8p22	0	10.1523	0	0	0	8.43417	0	0	13.4998	0	0	0	0	9.37308	0	0	0	0	0	0	0	0	0	-10.5885	0	3.91965	0	0	0	0	0	0	0	0	0	-3.82477	0	-18.4678	0	0	0	0	0	0	0	0	0	0	0
HML2_8p23.1c	0	0	0.14027	0	0	0	0	0	0	0	0	0	0	0	0.564909	0.082493	0	0	0	0	0	0	0.161033	0	0	0	0	0	0.167311	0	0	0	0	0	0	0	0.144925	0	0	0	0	0	0	0	0	0	0	0	0
HML2_8p23.1d	-2.19787	0	-16.2186	-33.7542	0	0	-19.773	-31.1081	0	-1.48191	-23.6105	-17.2264	-41.4037	0	0	-32.2484	-61.0409	0	-8.33916	5.26244	-8.54986	-39.1867	-47.4607	-27.6192	-31.7852	0	-50.2846	-37.7113	-19.0138	-31.0032	-22.6626	-34.5171	-33.7881	-1.81106	-43.3676	-6.18937	-19.5371	-38.0434	0	9.30869	-17.4441	-37.0016	-39.9517	-22.764	0	11.5106	-60.4649	-48.744	-46.8479
HML2_9q34.11	-2.20409	0	0	-8.53098	-4.25943	0	-13.2761	-7.17428	0	0	-10.8083	0	-13.1226	0	-7.00593	0	-11.1047	3.6442	0	0	0	0	-6.51617	-10.078	-6.18506	0	-7.97897	-7.65672	-6.04237	-11.3404	-6.25998	-8.98683	-5.84367	-2.39105	-22.3082	0	-8.07687	-7.22711	0	0	0	-8.6267	-6.33906	0	0	5.89196	-17.9824	-18.2571	-9.14096
HML3_10q11.21a	0	11.567	0	-33.5894	0	7.945	-16.2073	-28.2269	9.13863	0	0	-28.7322	-42.9453	0	-20.198	-31.0491	-40.9598	0	-5.95975	0	0	0	-41.0054	-30.289	-20.2128	0	0	-42.4191	-24.8578	-38.5536	-14.4243	-35.1785	0	0	-36.705	0	0	-37.5249	0	0	-14.8636	-40.4295	0	-17.3661	0	6.63229	-49.6995	-41.8396	0
HML3_10q11.21b	0	8.30639	0	-17.5173	0	5.49278	0	0	0	0	0	-15.403	-21.7825	0	0	-16.8799	0	0	0	2.97382	0	0	-21.2547	0	0	0	0	-26.4335	-15.7668	-15.9204	0	-14.8897	0	0	0	0	0	0	1.77874	0	0	0	0	0	0	6.5294	-21.3924	0	0
HML3_12q13.11	-0.449482	0	0	0	0	1.9309	0	-4.61366	0	-1.43916	0	0	0	0	0	0	0	0	0	0	0	0	0	0	0	0	0	0	0	0	0	0	0	0	-6.32587	0	0	0	0	0	0	0	0	0	0	0	0	-5.29077	0
HML3_13q12.11a	-2.55352	9.51048	-23.9611	-46.5786	-8.38137	0	-27.0257	-38.5198	0	-3.09089	-36.0028	-20.1304	-67.071	0	0	-47.4853	-77.5628	0	-17.7489	0	0	-32.6712	-59.6916	-41.3016	-37.7725	6.63134	-41.7608	-51.3444	-26.5929	-42.669	-25.8102	-50.8707	-31.9519	-2.42675	-66.2701	-12.4283	-21.6651	-54.2598	6.35459	0	-20.9197	-44.505	-43.0088	-27.6053	0	14.0835	-80.9612	-62.0771	-35.8444
HML3_13q12.11b	-4.74852	20.042	-25.7694	-56.7249	0	19.3211	-42.9852	-62.2185	32.1846	0	-45.6269	-29.694	-85.3726	35.2211	-31.9541	-54.0253	-131.03	26.3152	-10.0837	12.901	-18.6711	-77.5853	-89.1783	-63.0243	-70.2285	13.8036	-118.353	-74.3427	-32.4777	-65.1444	-37.8725	-69.792	-64.8416	-3.63488	-90.2394	-5.67048	-40.4909	-78.7952	7.72741	16.0893	-35.33	-76.0523	-80.3497	-44.3909	32.6081	26.2576	-133.6	-105.053	-109.266
HML3_15q11.2	0	0	0	0	0	0	0	0	0	0	0	0	0	0	0	0	0	0	0	0	-5.08249	0	0	0	0	0	-10.3008	0	0	0	0	0	0	0	0	0	0	0	0	0	0	0	-6.79407	0	0	0	0	0	-12.9194
HML3_16p13.13	-5.68775	8.15031	-25.9683	-48.0898	-11.2031	0	-36.1883	-52.0932	21.2253	-3.05584	-43.1813	-17.4491	-70.2805	22.5029	-32.5961	-40.9812	-94.8653	15.9497	-10.3807	10.3169	-9.55237	-56.9171	-64.9821	-48.7488	-53.4526	5.62794	-75.1759	-51.0301	-24.6085	-52.3918	-34.0474	-53.8481	-47.5564	-4.9989	-77.7291	-7.06197	-32.5774	-62.2568	5.18277	12.4555	-26.3285	-52.8052	-52.3723	-35.9412	29.0625	18.8002	-90.1585	-83.2958	-66.2357
HML3_16p13.3	-4.6126	34.2886	-16.8723	-54.7513	-14.366	16.4307	-33.0012	-52.3708	34.735	-3.23788	-40.5913	-45.9283	-84.0175	31.5248	-24.3303	-49.829	-112.166	19.9908	-11.971	12.0044	-13.2714	-67.3582	-91.7279	-73.2887	-54.687	11.6147	-91.393	-78.3874	-35.0792	-79.7492	-23.0085	-81.6811	-57.089	-4.17049	-79.5176	-7.70615	-31.589	-81.9497	6.19979	17.5159	-23.4853	-83.7995	-58.5282	-43.5681	37.4548	25.34	-123.54	-89.0681	-81.0934
HML3_19q13.31	0	0	0	0	0	0	0	-4.97601	0	0	0	0	0	0	0	0	-6.61256	0	0	0	0	-4.28854	0	-4.5183	-3.65456	0	-6.33342	0	0	0	-2.71336	0	-3.32653	0	-7.433	0	-2.47351	-4.31398	-0.0116828	0	0	-3.85575	-5.8213	0	0	0	-7.65924	-8.20127	-8.27711
HML3_1p21.3	-4.73929	9.69401	-16.1062	-36.9845	0	0	-26.3134	-35.7391	18.155	0	-31.1916	-12.6068	-49.809	18.7852	-17.144	-28.0099	-70.0409	15.8131	0	9.76842	-11.7165	-40.1494	-42.781	-34.4472	-41.6588	8.71227	-65.6513	-34.0868	-18.5776	-41.2428	-21.0359	-43.4816	-33.7386	-3.66862	-65.3895	0	-22.2205	-39.6558	5.84803	13.0202	-19.9654	-32.8852	-43.6985	-20.6387	19.8854	19.0072	-70.1667	-60.8555	-59.9701
HML3_1p33	0	5.44004	-7.62715	-7.77474	-3.50588	0	-10.0379	-6.12834	5.55711	-1.93668	0	0	-6.28143	5.01738	-7.65323	0	0	0.800026	0	2.74587	0	0	-8.61481	0	0	0	-6.65882	-5.80555	0	0	0	0	-9.0711	-3.39362	0	0	-7.71352	-11.0722	1.44169	0	0	0	0	-5.99499	0	4.28699	0	-9.92766	0
HML3_1q21.3c	-2.22689	1.83225	0	-9.72211	-4.34772	4.55158	-10.9464	0	2.80807	-1.74846	0	0	-9.75065	0	0	0	0	3.71264	0	0	0	0	0	0	-8.75846	1.61454	0	0	0	0	0	-9.05444	0	-2.3744	0	0	0	-6.73598	0	2.87938	0	0	0	0	0	0	-12.6883	0	0
HML3_1q25.2	0	7.9489	-11.3457	-19.1386	-8.83473	0	-16.8392	-34.3715	11.4895	0	-21.1842	-15.038	-31.5854	18.3801	-23.9383	-17.2954	-42.5691	0	0	8.05165	0	-31.1989	-30.7654	-39.2917	-28.3732	0	-46.7098	-26.0818	-14.0767	-32.8278	-16.2335	-31.435	-27.9375	-2.78043	-46.449	0	-25.0537	-45.8899	0	0	-16.8529	-32.901	-30.4317	-24.3532	18.1736	13.3628	-49.3804	-45.9759	-37.0479
HML3_3p21.31b	0	0	0	0	0	0	0	0	0	-0.315073	0	0	0	0	0	0	0	0	0	0	0	0	0	0	0	0	0	0	0	0	0	0	0	0	0	0	0	0	0	0	0	0	0	0	0	0	0	0	0
HML3_3p22.2	0	0	0	-6.23613	0	1.01151	-9.39468	-5.76587	5.001	0	-5.84641	0	-10.0071	4.57777	0	-5.13407	-11.7846	0	0	0	0	-4.42657	-5.14814	-5.65175	-6.61715	0	-9.39949	-3.94568	-2.87512	-4.45722	0	-4.18582	-4.42221	0	-9.45036	0	0	-6.00295	0	0	-7.17767	-5.76318	-6.12312	0	0	3.25999	-13.9631	-11.3806	-9.26584
HML3_3q13.11a	0	10.4598	-18.179	-49.0821	0	0	-24.7312	-36.8746	0	-2.97078	-29.267	-28.4598	-60.4917	0	-21.1275	-45.8234	-82.7565	0	-9.54451	0	0	-50.8939	-71.9792	-40.8914	-36.5877	7.61987	-66.8882	-60.103	-28.8651	-48.8307	-29.2467	-56.8736	-43.7962	0	-56.038	-6.82999	-30.2249	-53.0472	9.24997	10.8428	-21.7032	-57.8967	-55.6025	-30.072	20.745	21.4835	-83.3017	-62.6047	-55.5103
HML3_3q13.11b	0	0	0	-9.85489	-4.99683	0	-13.0535	-20.5431	0	0	-12.8481	-8.01995	-18.5857	0	-16.2015	-8.84463	-22.032	0	0	0	0	-19.3262	-15.2798	-22.482	-17.6257	0	-26.8726	-10.8024	-5.75074	-21.0247	-10.7031	-15.0939	-15.6127	0	-24.8989	0	-13.2283	-22.858	0	0	0	-20.1775	-17.4776	-13.5604	0	0	-30.0946	-29.1781	-24.5173
HML3_3q13.33	0	0	0	-19.9747	-4.67076	0	0	-17.5095	0	0	-14.1582	-8.96795	-33.3494	0	0	-25.6667	-27.9348	7.84544	-17.9981	0	4.13265	-16.1349	-26.6408	-20.4629	-18.2784	0	0	-21.3644	-11.111	-21.2031	-13.8188	-29.9236	0	0	-33.9598	-8.81557	0	-24.2741	0	0	-11.8054	-15.5789	0	0	11.4317	12.9806	-27.2728	-23.6325	0
HML3_3q22.1	0	0	0	0	0	0	0	0	0	0	0	2.66907	0	0	0	0	0	0	0	0	0	0	0	0	0	0	0	0	0	0	0	0	0	0	0	0	0	0	0	0	4.84788	0	0	0	0	0	0	0	0
HML3_3q26.1a	0	12.1909	0	-20.5772	0	14.2951	0	0	20.6963	-4.59274	0	-15.1191	-27.5057	16.0533	0	-17.1013	-40.1315	14.0123	-8.21731	0	0	-26.8061	-34.9499	-18.9465	-16.2435	9.15857	-34.7558	-29.3185	-14.9405	-25.8566	0	-31.562	-23.2981	-4.70743	-29.1144	-6.60414	0	-24.1228	6.21533	15.2453	0	-28.229	-24.7649	0	0	8.73847	-43.0921	-32.3375	-33.4049
HML3_4q13.3b	-2.33274	5.64886	0	-15.7559	0	3.50783	0	-14.5948	8.71316	0	-12.6174	0	-15.9631	9.99558	0	-10.8658	-33.9518	7.73365	-3.52645	2.13402	-7.24339	-25.583	-19.2893	-17.4731	-16.542	0	-35.616	-15.3185	0	-17.2706	0	-13.6492	-21.0587	0	-27.9852	0	-12.0716	-19.4431	3.02562	0	0	-16.9319	-23.0975	-16.2938	0	3.69901	-28.0611	-27.521	-33.7489
HML3_4q31.3	-5.37492	23.0378	-30.9953	-60.2153	0	23.7369	-47.9924	-69.8101	27.6236	-6.13136	-58.6032	-39.5317	-95.2869	32.9762	-40.8541	-57.7055	-134.353	29.7109	-10.4286	16.2577	-15.8341	-80.6964	-100.598	-81.7983	-72.8487	14.7432	-118.793	-85.2963	-38.0018	-85.1883	-41.3019	-88.4337	-72.2674	-4.39633	-106.36	0	-41.0477	-98.9286	8.52931	17.8633	-34.4371	-84.7592	-86.1792	-53.8348	37.1646	30.7193	-151.222	-117.934	-106.315
HML3_4q34.1a	-3.38809	11.8379	-17.312	-48.0764	0	15.9293	0	-38.1637	0	-2.84649	-25.6327	-29.3009	-58.4177	0	0	-45.1429	-89.4205	19.5364	-8.46889	0	0	-49.3536	-72.2148	-38.8959	-38.1433	10.8763	-64.2582	-58.5231	-28.696	-43.4814	-28.5407	-52.2918	-39.2454	0	-49.9971	0	-24.4392	-56.4267	8.62679	17.9122	-16.3815	-55.9157	-51.5042	-26.0846	30.2336	21.6087	-83.3358	-60.104	-54.8107
HML3_4q34.1b	0	0	-12.3881	-20.6097	0	8.60521	0	-14.7376	0	0	-11.5547	-13.102	-19.7116	0	0	-18.9999	-34.7589	0	-5.74779	0	-7.00192	-18.6897	-28.5706	0	-15.0244	0	-25.6881	-23.4448	-12.4879	-14.5632	-13.4994	-18.2261	-15.3254	0	-20.9274	0	0	-19.7886	4.85502	0	-9.795	-19.191	-21.6573	0	0	8.62877	-32.1723	-25.155	-22.2464
HML3_6q21b	-1.11836	0	0	0	-1.1422	0	0	0	0	0	0	0	0	0	0	0	0	0	0	0	0	0	0	0	0	0	0	0	0	0	0	0	0	-1.1389	0	0	0	0	0	0	0	0	0	0	0	0	0	0	0
HML3_7p12.3a	0	0	0	0	-2.85514	0	0	0	0	-3.1607	9.99724	0	0	0	7.99798	0	15.0886	0	0	0	15.5844	18.8706	0	0	9.23022	0	33.1565	0	0	0	0	0	10.1552	0	14.1223	0	0	0	0	0	0	0	17.9021	7.54748	0	0	16.413	0	32.0947
HML3_7p13	0	0	0	0	0	0	0	0	0	0	0	0	0	0	0	0	0	0	0	0	8.07018	0	0	0	0	0	0	0	0	0	0	0	0	0	0	0	0	0	0	0	0	0	0	0	0	0	0	0	0
HML3_7q11.21	-0.0367227	0	0	0	0.527272	-4.46462	0	0	0	0	0	0	0	0	0	0	0	2.24368	0	0.737266	1.69884	0	0	0	0	2.11786	0	0	0	0	0	0	0	0	0	0	0	0	0	4.06071	0	0	0	0	0	0	0	0	0
HML3_7q36.3	0	0	0	0	-2.96278	0	0	0	0	-1.24547	0	0	0	0	0	0	0	0	0	-3.8074	0	0	0	0	0	-0.539014	0	0	0	0	0	0	0	-2.50516	0	-0.419102	0	0	0	0	0	0	0	0	0	0	0	0	0
HML3_8p11.22	0	11.7882	0	-15.2391	-7.35909	15.7373	0	-18.1122	15.0033	0	-21.611	-14.9085	-33.3345	0	0	0	-55.1448	14.2538	0	0	-10.7502	-33.2348	-34.0504	-40.4699	-16.7947	7.94202	-61.9215	-28.7318	0	-27.1142	0	-38.0441	-31.1297	0	-44.0625	0	-23.1892	-45.4282	7.12406	0	0	-44.3765	-43.7056	-22.828	0	0	-61.966	-41.2456	-51.5609
HML3_8q11.23a	0	0	0	0	0	0	0	0	0	0	0	-1.03976	-4.60145	0	0	-4.30935	-8.1743	1.32857	-0.21813	0.901499	0.582344	0	-6.08359	0	0	0.652414	0	-6.10344	0	0	0	0	0	0	0	-0.271534	0	0	0	2.00371	0	0	0	0	0	0	-7.13472	0	0
HML3_8q11.23c	-1.34953	2.75909	-5.75939	-5.7781	-3.93112	0	0	-6.95886	0	0	-7.83841	-3.64015	-14.1679	0	0	-5.7676	-11.8763	3.00029	0	0	-2.2386	-5.94318	-9.57661	-7.50875	-11.4514	0	-9.98226	-8.98867	-7.51397	-13.9208	-7.64663	-16.6517	-4.67145	0	-13.0229	0	0	-8.83102	0	3.91935	-6.28028	-6.74181	0	0	0	2.03145	-18.4529	-12.0745	-10.6727
HML3_8q13.2	-4.02549	0	0	-46.6262	0	0	0	-31.3001	0	-2.88935	-25.4062	-32.1973	-60.6059	0	0	-44.9304	-87.5505	14.3677	-9.50921	11.4985	0	-49.3015	-72.336	-36.6029	-33.4417	12.0511	-58.1704	-63.4853	-25.6561	-48.7534	-20.2999	-59.9688	-39.7928	-2.70892	-52.1118	-6.60564	-19.1944	-46.0037	0	18.6308	-17.3694	-54.3046	-50.2396	-26.1361	17.3818	18.776	-87.3527	-58.8353	-53.2248
HML3_8q24.13	-2.06098	0	0	0	-6.24646	0	0	0	0	0	0	0	0	0	0	0	0	0	0	0	9.89239	0	0	-16.7842	0	0	0	0	0	0	0	0	0	0	0	0	0	-17.2677	0	0	0	0	0	0	0	0	0	-17.7705	0
HML3_9q34.13	-1.7295	0	0	-6.43214	0	0	-9.80699	-11.7768	6.15702	0	-12.0637	-2.8489	-10.8937	0	-9.4353	-5.84756	-19.3547	1.75405	0	0	0	-13.8431	-11.4776	-16.0757	-11.5011	0	-17.4246	-8.06325	0	-14.1543	-6.11177	-10.9906	-12.1898	-1.74517	-19.4	0	-8.54805	-13.9566	0	0	0	-12.9895	-10.893	-11.3837	0	0	-21.4694	-18.1773	-15.3805
HML3_Xq21.1a	0	10.5847	0	0	0	7.61173	0	0	0	-2.88817	0	0	0	0	0	0	0	0	0	0	20.5284	0	0	-18.2861	0	0	0	0	0	0	0	0	0	0	0	-4.10707	0	-26.0731	0	0	0	0	0	0	0	0	0	0	28.813
HML4_10p15.1	0	11.147	0	0	0	3.32168	0	0	15.0138	-3.25657	0	0	-14.5147	19.0003	0	0	0	7.57972	0	0	0	0	-12.0029	-12.2911	0	0	0	-14.3938	0	-12.6158	0	-12.3474	0	0	0	0	0	-17.9155	0	0	0	-12.7229	0	0	10.0747	0	0	0	0
HML4_19p12	0	0	0	-14.6817	0	0	0	-17.4766	0	0	0	-9.4634	-22.4013	7.21703	0	-15.5407	-41.2923	0	-8.01597	6.70666	-10.2339	-24.2871	-25.9823	-13.5651	-19.1969	4.33934	-37.2032	-21.0534	-7.35348	-14.2601	-10.7182	-15.2096	-16.7529	0	-28.5949	-5.94158	-14.9763	-23.7863	2.85408	0	0	-19.6917	-30.0076	-11.7455	17.5172	11.5436	-34.8572	-32.1027	-33.2007
HML4_3q26.2	0	0	0	0	0	0	0	0	0	0	0	0	0	0	0	0	0	0	0	0	0	0	0	0	0	0	0	0	0	0	0	0	0	-0.00885974	0	0	0	0	0	0	0	0	0	0	0	0	0	0	0
HML5_11q12.2	-4.06589	22.3716	-20.6174	-51.9438	0	20.6093	-32.9886	-51.0849	22.8764	-2.75994	-37.3479	-32.2647	-73.328	23.9288	-23.4216	-44.8505	-101.871	26.6075	-8.62316	16.3139	0	-57.8016	-78.0781	-54.0739	-49.9855	12.9504	-74.1406	-66.1751	-26.3912	-51.6602	-32.5038	-62.7805	-44.8881	0	-63.9398	0	-33.9929	-73.2821	9.9757	11.5169	-30.8188	-65.1754	-54.4639	-35.1759	33.5262	30.4326	-96.8212	-80.6063	-62.0693
HML5_12q21.32	0	0	-9.33211	-12.009	0	0	-13.0066	-19.2992	5.03264	0	-15.6694	-7.58052	-25.098	4.7312	-13.1457	-15.3708	-43.2821	3.58724	0	4.80552	-12.2282	-26.6501	-21.519	-22.2386	-23.9372	0	-46.7617	-18.0022	-6.12986	-17.009	-13.1298	-19.8814	-20.7886	0	-25.9839	0	-13.7494	-20.8519	1.39317	0	-12.0569	-19.1437	-25.786	-14.8177	10.3155	7.01814	-44.6597	-28.9109	-43.272
HML5_18q21.2	0	0	0	0	1.33694	0	0	0	0	-1.84686	0	0	0	0	0	0	0	0	0	0	0	0	0	0	0	4.85414	0	0	0	0	3.75044	0	0	0	0	0	0	0	1.48594	0	0	0	0	0	0	0	0	0	0
HML5_19p12d	-1.53772	0	-5.02424	-5.98709	-1.45305	0	0	-7.55729	0	-0.930792	0	0	0	0	0	0	0	0	0	-0.431005	0	0	-6.68195	0	-8.31518	1.22345	0	-6.88079	-4.86645	-6.50599	-6.17392	-6.66547	0	-1.38942	0	0	0	-7.85049	-0.0162659	0	0	0	0	0	0	0	0	0	0
HML5_19p12e	-2.21678	0	-9.81908	-16.7144	0	0	-17.8229	-8.36934	8.41099	-1.7562	0	0	-11.6786	7.50869	0	0	-13.0834	0	0	6.3354	0	0	-10.7256	0	-10.8064	2.31919	0	-8.50183	0	0	-10.2216	0	0	-2.38657	0	0	0	-11.665	0	0	0	0	0	0	0	7.84883	0	-13.2621	0
HML5_19p12f	0	0.679919	0	-6.00138	-2.44338	0	-9.12496	0	0	0	0	0	0	0	0	0	-5.02475	0	0	0	-2.75693	-2.46259	-2.57868	0	0	0	-5.96204	-2.24037	0	0	0	0	0	0	-3.61345	0	0	0	2.36681	0	-3.83287	0	0	0	0	0	-5.93343	0	-5.23625
HML5_1q22	-3.74319	0	-14.6338	-42.6769	-13.1293	0	-26.5215	-40.9429	19.2527	-2.95334	-26.5955	-16.0892	-58.7665	28.6164	0	-34.8137	-87.2589	22.9978	-10.8218	11.0686	-8.73469	-47.4232	-58.2107	-46.7535	-47.4515	13.8079	-71.4006	-52.7192	-18.7762	-43.057	-16.7918	-49.4262	-41.5212	-4.43986	-63.9052	-7.04413	-23.9998	-58.1181	5.96566	18.6943	-19.3731	-50.9778	-45.2152	-24.3852	26.4367	21.6798	-89.58	-68.1634	-67.2611
HML5_1q42.12	-1.54182	3.83367	0	-12.2147	0	0	-11.4556	-10.9477	0	0	0	-4.29266	-18.5051	0	0	-8.94821	-18.8985	3.44401	0	0	0	0	-9.03834	-17.3424	-12.5058	0	-20.4061	-6.2905	-6.56787	-9.34813	-6.93796	-10.8449	-6.21787	0	-13.2734	0	0	-16.7602	0	0	-10.1753	-14.5095	0	0	0	0	-20.0243	-15.8815	-13.5286
HML5_2q14.3	-1.03463	0	-8.98954	-12.5643	-1.13483	0	-14.7699	-16.0415	3.23008	0	-11.9798	-3.77868	-19.6091	0	-11.5309	-8.2311	-22.9787	3.42376	0	2.63378	-7.80829	-14.3331	-13.6898	-15.3162	-17.7646	0	-26.7024	-9.68701	-6.83442	-13.7961	-10.908	-15.2443	-11.9816	0	-21.8739	0	0	-16.6114	0	0	-11.204	-8.93032	-17.8752	-8.71097	10.0732	8.5441	-27.2046	-20.3554	-24.7528
HML5_4q24	0	0	-10.9022	-9.68114	0	0	-19.5491	-17.8623	5.00023	0	-11.4269	-3.88755	-19.0045	4.74639	0	-7.315	-40.9074	2.32181	0	3.32559	-13.0375	-31.4585	-17.5901	-19.5581	-23.4098	0	-51.7793	-11.6227	0	-12.6074	-14.9105	-15.2091	-25.5951	0	-35.4665	0	-13.1871	-20.8756	0	0	-13.5069	-16.6635	-39.6194	-16.859	12.3112	8.00532	-40.6901	-33.622	-46.31
HML5_7p14.1	-3.66292	14.0747	0	-32.5538	-7.66186	0	0	-28.5059	14.094	-2.45879	-22.5994	-13.7265	-44.4679	0	0	-26.394	-58.4076	12.997	-6.53609	12.2292	0	-36.2175	-44.0985	-29.6961	-32.5835	12.493	-50.6384	-39.7544	-16.8419	-35.9795	-13.6189	-38.4752	-30.2308	0	-46.2123	0	-21.6449	-38.0615	0	15.4796	0	-35.5179	-34.6249	-18.2732	17.1477	21.5902	-57.8036	-52.7796	-50.9428
HML5_8p21.2	0	0	0	-16.3635	-7.47798	8.14034	0	-20.2281	0	0	0	0	-21.9785	0	0	-14.3647	-38.2138	0	-9.79024	0	-8.27812	-22.1569	-25.1936	-24.6315	-18.8791	0	-39.4369	-23.0078	-8.84603	-22.1527	0	-21.5959	-22.4297	0	-25.6202	-6.75463	0	-30.4963	0	0	0	-21.3573	-23.297	-15.9435	0	5.74776	-40.841	-27.3035	-30.646
HML5_8p23.2b	-0.749691	0	0	-4.84204	-0.0865336	0	0	-3.51642	0	-0.284496	-4.21422	0	-4.83969	-0.777085	0	-3.73001	-4.95862	0	0	0	0	0	-4.80238	0	-3.21587	0	0	-4.45798	-3.30664	-4.61357	-2.99034	-4.04291	0	0	-4.86621	0	0	-3.83101	-0.0177467	1.0845	0	0	0	0	0	0	-5.95799	0	0
HML5_Xq13.1a	0	0	0	0	0	0	0	0	0	0	0	0	0	0	0	0	0	0	0	0	0	0	0	0	-0.0572455	0	0	0	0	0	0	0	0	0.0119532	0	0	0	0	0	0	0	0	0	0	0	0	0	0	-0.0951576
HML5_Xq21.33	-3.04506	0	0	-36.0726	0	0	0	-19.0852	0	-3.85024	0	-12.4475	-30.6017	0	0	-31.0094	0	0	0	0	10.4813	0	-28.3896	0	-16.8246	7.86989	0	-30.6265	-19.6614	0	-15.4804	-24.2209	0	0	0	0	0	-28.4693	0	0	-15.2505	0	0	0	0	16.1773	-28.8407	0	0
HML6_11p15.4	-4.57047	21.8072	-18.4382	-45.5505	-12.7112	20.6642	-24.9453	-40.3074	29.5762	-5.21813	-28.3812	-34.191	-68.7399	24.8886	0	-46.3071	-94.226	20.2527	-9.09612	0	-15	-61.3173	-79.8023	-51.3615	-43.6382	11.3537	-89.0938	-66.3676	-24.7228	-53.5312	-25.5431	-65.7127	-47.2237	-6.02229	-56.5697	-6.85241	-25.6356	-65.2802	8.06486	0	-23.9202	-64.903	-67.2126	-32.6978	0	21.1702	-102.887	-73.6714	-73.0661
HML6_12p11.21	-0.346472	0	0	-5.85973	0	0.697957	0	0	0	0	0	-5.53156	-14.597	0	0	-4.90045	-11.4861	0	0	0	0	0	-12.4016	-5.68583	0	0	0	-12.8168	-4.88566	-12.1692	0	-12.6127	0	0	-7.21667	0	0	0	0	0	0	-7.32208	0	0	0	2.07892	-16.4962	0	0
HML6_12q24.12a	-5.48255	25.0193	-19.3871	-58.2338	-17.6407	9.6128	0	-58.0332	31.2081	-5.86823	-35.4478	-42.7656	-90.3546	33.1019	0	-55.5719	-121.357	27.5129	-16.1642	0	-10.6922	-72.1068	-99.7238	-68.7697	-63.5229	16.8404	-104.615	-87.8919	-38.8516	-67.7548	-24.7668	-83.0425	-59.6193	-6.6893	-75.5579	-12.7671	-33.9172	-85.5101	13.7466	23.8025	-37.5896	-87.1561	-66.7279	-36.6259	33.3589	31.259	-134.233	-95.7929	-88.9761
HML6_14q12b	-0.854389	0	0	0	0	6.96338	0	0	9.99821	-2.14499	-15.5515	0	-17.3131	0	0	0	-19.4633	11.424	0	0	0	-14.8719	-16.6094	-24.7556	0	6.11048	-15.6428	-14.6903	0	-15.9662	0	-19.9145	-13.6172	0	-20.4509	0	-13.5531	-25.7582	0	0	0	-23.7133	0	0	0	0	-23.6002	-19.5472	-14.3917
HML6_16p11.1	0	0	1.85593	0	-0.0974042	0.312085	0	1.79609	0	0	7.49628	0.556603	5.91153	0	6.09654	4.71358	7.05273	0	0	0	0	2.99103	0	0	1.16066	0	6.55738	3.17934	0	1.92601	2.40372	1.36496	1.55985	0	0	0.449327	5.38689	0	0	0	1.75777	5.37761	0	3.31503	-2.8075	0	6.39952	5.71331	5.7551
HML6_16p11.2	0	0	-3.73408	-6.1389	-3.40629	0	-5.78281	0	0	0	-4.16902	0	-5.16802	0	0	-5.96977	-5.8121	0	0	0	0	0	-4.57893	0	-4.48722	0	0	-4.61503	0	-5.85112	-4.40349	-6.1495	0	0	-7.93242	0	0	0	0	0	0	0	0	0	-1.61156	0	-6.41072	-6.06642	0
HML6_19p12e	-3.42684	14.0982	0	-26.069	-9.88917	12.151	0	-17.2559	13.3555	-3.09032	0	0	-23.2609	0	0	-16.1561	0	13.4733	-5.99395	11.5983	0	0	-18.5607	0	-15.3586	6.39352	0	-17.7247	-12.0853	0	-12.447	-18.6776	0	0	-28.382	0	0	-22.1945	6.6622	8.89038	0	0	0	0	19.9217	20.754	0	-27.536	0
HML6_19p13.2b	0	3.03462	0	-9.03566	0	0	0	-8.44564	6.16095	0	-8.66251	-6.76272	-9.07512	9.65964	-6.31642	-6.89719	-18.4712	0	0	1.57411	0	-10.2068	-14.1341	-9.14823	0	0	0	-15.4347	-5.83072	-16.2463	0	-7.41203	-8.50262	0	-20.9681	0	-6.38496	-8.17791	2.57953	0	0	-13.0812	-11.0799	-10.4726	0	2.34309	-20.1602	-17.1843	-11.4143
HML6_19p13.2d	0	15.2053	-29.5254	-68.3654	0	23.4717	-47.6614	-65.6135	31.3014	-3.50761	-51.2863	-38.6771	-87.1296	37.9984	-42.8746	-65.4109	-129.947	18.5663	-9.45565	13.9783	-11.5508	-75.4643	-99.5628	-69.7388	-66.7999	7.14614	-103.227	-86.0933	-43.4487	-81.4831	-38.4232	-74.4021	-68.7227	-4.22801	-99.1011	0	-45.8069	-85.699	6.92608	0	-37.7214	-80.2561	-79.2129	-51.9985	35.7677	27.2024	-137.895	-107.924	-88.4766
HML6_19q13.41f	-5.92665	15.6853	-18.3982	-43.9161	-14.5801	19.5747	-31.1327	-40.5472	23.0948	-4.08274	-31.361	-22.7692	-52.3475	27.2345	-20.891	-35.2106	-89.2211	18.7074	-10.2704	9.18131	-8.38923	-51.0782	-59.4389	-42.88	-46.4883	10.1627	-65.0729	-51.5191	-21.5313	-46.8796	-24.0455	-52.684	-41.7385	-5.00537	-59.1949	-7.70026	-29.8405	-53.7734	7.91362	12.5428	-21.4187	-51.4394	-49.4556	-28.3666	22.7258	21.6208	-81.9134	-69.8649	-66.9127
HML6_2q14.3	0	0	0	0	0	0	0	0	-2.81196	0	0	0	0	0	0	0	-12.3588	0	0	0	0	0	-7.82759	0	0	0	0	-5.76432	0	0	0	0	-5.88048	0	0	0	0	0	0	0	0	0	0	0	0	2.63237	0	0	0
HML6_3p25.1	-1.82756	0	-4.38109	-8.85065	-5.03873	0	-11.4756	-6.61165	0	0	-8.70739	-3.01892	-9.53723	0	0	-6.14387	-13.1236	0	-0.639702	0	0	-6.88382	-8.89222	-6.06613	-8.42337	0	0	-7.51137	-4.40691	-11.8578	-5.77773	-7.96003	-6.13614	-1.91661	-15.8749	0	-7.9887	0	0	0	0	-7.52326	0	-5.0542	0	0	-14.8781	-14.5179	0
HML6_4q21.1	0	0	0	0	-4.8755	0	0	0	3.52819	0	0	0	0	1.59554	0	0	0	0	0	0	0	0	0	0	0	0	0	0	0	-10.0403	0	0	0	0	0	0	0	0	0	0	0	0	0	0	0	0	0	0	0
HML6_6p22.2	-2.51136	13.4159	-15.2114	-31.3899	0	10.3124	0	-27.3881	8.00414	-2.94808	-20.5891	-25.8764	-48.9548	0	0	-32.4544	-57.989	0	-10.4618	0	5.36274	-26.8449	-53.3795	-30.0311	-28.816	10.0057	-23.6	-46.7186	-27.6684	-39.9454	-16.7075	-46.9989	-23.5613	0	-35.5904	-9.18811	-17.3263	-46.5519	9.5576	13.8676	-16.8674	-45.5826	-24.2354	-16.881	0	10.9385	-59.1771	-40.0653	-19.4295
HML6_7p13	-3.02206	0	0	-29.4759	0	0	0	-28.1722	10.5271	-2.22517	-20.8823	-22.2397	-45.836	13.8819	0	-35.8472	-69.2245	9.97188	-12.3618	0	-7.69285	-40.3061	-50.9919	-35.4552	-33.8334	10.9684	-57.5205	-46.7869	-18.8824	-40.2542	-14.6796	-48.4103	-31.4012	-2.59168	-48.9646	-9.23155	-19.2668	-42.9377	7.4619	13.1276	-21.917	-46.2761	-34.7355	-19.9056	0	18.1641	-67.9989	-51.1539	-49.3951
HML6_8q12.1	0	0	0	0	0	0	0	0	0	0	0	0	0	0	0	0	0	0	-3.91072	0	4.93089	0	0	0	0	0	0	0	0	0	0	0	0	0	0	0	0	0	0	0	0	0	0	0	0	0	0	0	0
HUERSP1_11p15.4b	-3.75125	17.1074	-18.5671	-43.9845	-9.42783	16.1962	-27.9753	-51.2229	28.7037	0	-37.0802	-28.689	-70.3667	28.1477	-36.9515	-38.6117	-97.1525	12.7493	-9.97508	12.6479	-18.284	-60.2495	-74.0077	-58.3126	-48.1729	0	-93.7368	-65.4443	-28.7116	-62.8632	-23.4168	-59.325	-53.8863	-3.69104	-74.2023	0	-31.0661	-70.9247	0	0	-23.133	-59.2115	-64.8842	-39.4189	37.6682	23.4822	-109.231	-75.7924	-78.3674
HUERSP1_14q23.1	0	-3.13607	-22.2142	-43.9824	0	5.88401	-29.3161	-41.4305	0	0	-26.055	-20.8025	-49.1028	0	-29.9503	-35.3247	-78.1745	0	-8.52582	7.86818	-11.8121	-49.6539	-60.9172	-41.1817	-38.8168	0	-62.942	-47.3577	-23.5173	-46.2126	-27.4513	-40.288	-39.8031	0	-54.1267	-7.62276	-25.8747	-52.0453	0	0	-22.3337	-46.8609	-49.7845	-34.4079	23.4303	18.3309	-76.0021	-58.5956	-54.2522
HUERSP1_15q21.1a	0	0	0	-10.0464	-4.08171	0	0	-14.2196	0	0	0	0	0	0	0	0	0	0	-4.62818	0	0	0	-13.8363	-15.6134	0	0	-22.1078	-10.6798	0	-17.3152	0	-9.93768	-12.2036	0	-19.5971	-1.69885	0	-20.3122	0	0	0	-14.9954	-15.4757	0	0	0	-23.7558	-20.0635	-18.444
HUERSP1_15q22.31	-4.0228	8.6275	-24.7382	-50.9175	-9.49999	0	-38.1053	-45.0888	15.9951	-2.3167	-40.0801	-23.7157	-72.3082	22.0378	-27.5512	-47.847	-100.123	18.4667	-9.8541	13.7738	-12.8507	-60.3283	-71.3545	-48.4866	-54.3405	0	-84.1164	-56.4188	-25.9582	-55.7494	-33.4451	-59.7599	-51.5063	-3.49642	-73.6175	-6.41772	-33.1764	-58.2068	6.44962	9.15454	-24.1158	-57.6367	-56.1381	-36.3158	32.5989	25.7693	-100.427	-78.6553	-78.3174
HUERSP1_15q23b	-1.70735	6.03132	0	-8.95295	0	6.24076	0	-7.07768	0	0	-11.1095	-10.1834	-20.7101	0	0	-15.2417	-22.6803	0	0	0	0	0	-19.2627	-17.5556	-7.40489	0	-13.8983	-16.5313	-10.3	-17.7	0	-17.3615	0	0	0	0	0	-13.3501	0	5.66238	0	-20.5728	0	-8.27049	0	0	-25.4564	-12.7465	0
HUERSP1_1p13.3	0	0	0	-14.1975	0	7.81315	0	-17.0394	12.6609	0	0	-13.6732	-20.293	10.3373	0	0	0	0	-6.24469	0	0	-19.4786	-29.1091	-20.3222	0	0	-33.7138	-26.753	-10.6826	-29.963	0	-21.8731	-21.6632	0	-29.8451	-5.81421	0	-25.3167	0	0	0	-25.5029	-22.5666	0	0	6.57201	-39.5147	-25.9576	-27.2156
HUERSP1_1q44a	0	0	-3.22191	-4.24688	0	0	-4.53542	-8.49354	0	0	-5.60235	-3.83408	-8.26396	0	-5.21072	-4.04934	-11.5796	0	0	0	0	-4.42811	-6.43325	-8.63301	0	0	-8.39038	-4.51265	0	-5.26369	-5.08927	-5.48631	-4.58287	0	-7.95655	0	-3.91569	-8.03435	0	0	0	-5.63805	-6.64629	0	4.73765	1.55107	-10.3786	-8.51222	0
HUERSP1_20p12.3	0	8.66666	0	0	0	12.5353	0	-12.58	14.0085	0	0	0	0	0	0	0	0	4.53725	0	0	0	0	0	-23.1166	0	3.17286	-15.9966	0	0	0	0	0	0	0	0	0	0	-29.3456	2.40057	0	0	0	0	0	11.3484	0	0	0	0
HUERSP1_2q31.1a	0	0	0	0	0	-2.61413	0	0	-2.39029	-0.735453	0	0	0	-3.15596	0	0	0	0	-2.8659	1.87011	10.3127	14.4738	0	0	0	0	20.8684	0	-4.11362	0	0	0	0	0	0	-1.21618	0	0	0	0	0	0	0	0	0	0	0	0	17.4306
HUERSP1_5q14.1	0	0	0	0	0	0	0	0	0	0	0	0	0	0	0	0	0	0	0	0	0	0	0	0	0	2.96063	0	0	0	0	4.69378	0	0	0	0	0	0	0	0	0	0	0	0	0	0	0	0	0	0
HUERSP1_7p12.3a	-2.12622	0	0	0	0	0	0	0	0	-0.84894	0	0	0	0	0	0	0	0	0	0	9.62655	13.759	0	0	0	0	18.0546	0	0	0	0	0	0	0	0	0.757662	0	0	0	0	0	0	13.3181	0	0	0	0	0	0
HUERSP1_7q21.12	-4.24273	11.4024	-23.4185	-52.9139	0	11.5796	-32.0212	-40.8815	21.7951	-2.6046	-29.3486	-27.0799	-65.8036	29.779	0	-51.1672	-99.0212	22.553	-9.58126	14.7813	-11.6182	-54.8474	-76.1714	-43.8389	-46.9782	12.1322	-71.8408	-66.6247	-27.6146	-47.9332	-27.4646	-56.4137	-46.0534	-3.45434	-60.2576	-6.34406	-33.7613	-59.3502	11.2541	16.0831	-29.7654	-57.6211	-58.6497	-28.1224	32.0094	30.1923	-99.8836	-71.2589	-66.6719
HUERSP1_8q13.3	0	0	0	-7.60739	0	0	-7.74181	0	0	0	0	-3.03457	-10.2702	0	0	0	-14.7464	0	0	0	0	0	0	0	-9.12158	0	-13.1958	-5.21599	-3.08526	-8.68622	0	-7.57186	0	0	-15.2498	0	0	-6.3719	0	0	0	0	0	0	0	0	-18.8993	-13.4423	-14.9295
HUERSP1_8q21.13	0	0	0	0	-3.79694	0	0	0	0	-0.940263	0	0	0	0	0	0	0	0	-2.2521	0	0	0	0	0	0	0	0	0	0	0	0	-7.14775	0	0	0	-3.16087	0	0	0	0	0	0	0	0	0	0	0	0	0
HUERSP1_9q22.33	-2.16079	0	-9.0631	-16.7179	-9.62915	0	-17.2546	-29.1895	0	0	-16.8261	-11.8955	-26.7741	0	-19.0648	-13.9002	-36.8252	0	0	4.99976	0	-22.6385	-23.4311	-29.7842	-24.6966	0	-33.1771	-19.2385	-10.2625	-24.1044	-13.0052	-21.1085	-21.1616	-2.33857	-33.9939	0	-16.4012	-36.6265	0	0	-9.47315	-25.6747	-19.8599	-19.3074	14.7483	4.16086	-41.0053	-40.571	-27.999
HUERSP1_Xp22.2	-1.16199	5.73525	0	-12.9896	-1.95372	0	-13.0938	-14.5606	0	0	-15.8897	-8.09561	-21.4451	0	-9.33307	-14.6646	-23.3965	0	-1.32411	0	0	-10.4818	-16.0935	-18.255	-14.2827	0	0	-14.1881	0	-11.6554	-10.1919	-16.1419	0	-1.36526	-16.2991	-3.64735	-9.74632	-26.7134	1.83016	0	-11.4096	-17.3595	0	-6.69633	0	4.62007	-26.6263	-23.2368	0
HUERSP2_11q22.1c	-4.85969	16.7478	-20.7258	-52.7093	-13.8544	0	-31.3161	-44.7917	21.2103	-3.13494	-32.671	-23.451	-66.2495	20.6358	0	-47.8756	-97.3391	20.8448	-14.84	0	-11.0566	-57.9004	-77.0399	-45.488	-43.295	8.46614	-76.5261	-59.4547	-23.8091	-48.248	-26.588	-51.9974	-46.4872	-3.70713	-65.0685	-10.7579	-34.9274	-64.8411	9.38239	0	-22.8868	-56.3384	-62.2336	-34.0573	15.287	20.0008	-92.325	-77.2713	-64.3785
HUERSP2_12q21.1	0	12.3666	0	-16.5821	0	16.849	0	-22.3955	14.3805	0	-20.0808	-11.6747	-28.6534	7.14559	-17.7511	-14.7018	-44.7644	0	0	0	0	-17.4751	-28.9013	-26.8034	-14.8102	0	-26.711	-24.4714	-8.48991	-20.0769	-7.9248	-23.7828	-19.8098	0	-24.32	0	-10.4791	-32.9947	0	0	-8.82812	-29.6573	-25.5945	-22.6078	0	0	-40.0903	-30.8991	-22.3323
HUERSP2_14q31.3	0	17.2806	0	0	0	2.82431	0	0	0	0	0	0	-19.0321	0	0	0	0	0	-7.61334	0	0	0	-21.019	-20.7746	0	0	0	-17.5758	0	-20.6043	0	-18.4579	-13.1033	0	0	-5.25197	0	-20.6653	4.39797	0	0	-19.2929	0	-14.3241	0	0	0	0	0
HUERSP2_17q12	0	0	0	0	0	0	0	0	0	-1.19103	0	0	0	0	0	0	0	0	0	0	0	0	0	0	0	0	0	0	0	-4.6835	0	-5.64959	0	-2.2414	0	0	-5.63224	0	0	0	0	-8.77642	0	0	0	0	0	0	0
HUERSP2_19p12	0	0	0	-8.28626	0	0	0	0	0	0	0	0	0	0	0	-10.3431	-14.8684	0	0	3.2172	0	0	0	0	0	0	0	-9.98364	0	0	0	-9.81848	0	0	0	0	0	0	0	0	0	0	0	0	0	7.30572	0	0	0
HUERSP2_19q13.2	-3.10861	28.5143	-14.5563	-36.1398	-13.3411	14.2491	-25.7378	-40.3551	22.6918	-3.12641	-27.6291	-32.8904	-64.3521	22.4253	-20.481	-29.2121	-70.6886	11.4887	-10.3746	0	0	-41.3867	-64.2757	-59.2161	-38.4667	8.38802	-51.483	-53.8225	-23.3641	-55.1961	0	-58.2039	-43.3924	-3.36472	-50.9358	-7.99828	-25.6388	-69.1176	5.49801	0	0	-70.4904	-39.353	-33.7807	17.7486	9.31352	-86.1066	-66.3552	-46.0846
HUERSP2_21q22.3	0	0	0	-13.5443	0	0	0	0	0	0	0	-6.61911	0	0	0	-12.6466	0	0	-2.84839	6.88383	0	0	-17.0892	0	0	2.09357	0	-16.2263	-10.5033	-15.5146	0	-13.4342	0	0	-17.1569	0	0	-14.3235	0	0	0	0	0	0	0	14.632	0	-20.1009	0
HUERSP2_3q21.3	-4.17139	25.0269	0	-35.1235	0	25.0625	0	-27.8877	21.564	-5.41786	-19.0299	-28.5728	-45.5441	20.6414	0	-37.347	-63.672	13.8077	-9.23295	0	0	-36.2028	-57.9915	-34.0261	-29.8016	14.2824	-38.6837	-53.6042	-24.5926	-39.8222	0	-50.8901	-35.862	-5.4801	-42.2665	-5.77041	-18.5833	-39.7879	8.4326	18.3529	-20.2826	-50.3623	-35.4864	-26.3212	0	21.9673	-64.1458	-54.6126	-37.1123
HUERSP2_3q26.1e	0	0	0	-6.90448	-6.55841	6.15732	0	0	8.11776	-2.95528	-7.35049	-5.94342	0	4.25707	0	0	0	2.09982	-4.41509	0	-6.26187	-10.668	-11.0244	-8.66417	0	0	-16.2143	-10.6019	-4.62526	-11.4033	0	-11.5859	0	-4.08252	-13.1284	0	0	0	0	0	0	0	0	0	0	4.56187	-15.7103	-11.7765	-16.6714
HUERSP2_3q26.33	-2.79544	9.70409	-14.6671	-38.4967	0	12.2755	0	-35.8818	0	0	-27.7453	-29.209	-55.3911	0	0	-43.6093	-79.7089	0	-8.14918	9.24881	0	-41.3392	-67.2268	-37.4083	-35.7792	9.18938	-49.9396	-60.9495	-26.7207	-47.5921	-23.0302	-53.8297	-37.2532	0	-47.5428	0	-23.0091	-50.5477	5.51387	15.1135	-19.8737	-55.2703	-41.1235	-26.9443	23.7508	20.0731	-80.6432	-58.0432	-45.4021
HUERSP3_10q23.33c	-1.6984	2.96782	0	-14.6693	0	0	-11.4182	-7.30338	7.14746	0	-9.85564	0	-10.95	5.71544	-6.54365	-8.60405	-12.8897	2.21518	0	-5.51221	0	-4.80178	-10.32	0	-8.49114	0	-9.32861	-8.78527	-5.77863	-12.9382	-7.45534	-9.79197	0	-1.84183	-15.4788	0	0	-5.90073	0	0	0	0	0	-4.29698	0	0	-12.8028	-14.5504	0
HUERSP3_11p15.1	-2.52491	7.95049	0	0	-6.23363	5.93287	0	-15.7489	0	0	0	0	-17.0323	0	0	0	-29.9934	3.51246	0	4.05903	-4.99398	-15.9831	-12.0215	-20.3206	-13.8918	0	-26.0804	-9.36001	0	0	0	-14.6052	-13.34	0	0	0	0	-15.3382	4.83998	7.19157	-11.995	0	-13.6142	0	0	5.56144	-24.9906	-18.8367	-17.6376
HUERSP3_11q24.2	-2.83065	0	0	0	0	0	0	0	0	0	0	0	-14.0464	0	0	-7.69893	-21.9938	0	0	0	0	0	-8.23669	-13.8084	0	4.30545	0	0	0	0	0	-11.3852	0	-2.5111	0	0	0	-7.51094	0	0	0	-11.6046	0	0	0	0	-11.7101	0	0
HUERSP3_1q23.3	-1.48794	5.66953	-5.97234	-8.73889	-4.29215	5.13932	-13.1802	-15.2299	10.7637	-1.28273	-17.2526	0	-15.5872	11.0665	-13.6092	0	-22.6296	2.81523	0	0	-6.30214	-17.3649	-9.31744	-19.3401	-17.4896	0	-31.8974	-8.77902	-4.48944	-16.1008	-8.20131	-11.7675	-17.7647	0	-30.8084	0	0	-24.5535	3.50822	0	0	-18.644	-22.342	-12.7098	0	0	-25.8567	-28.1348	-30.2998
HUERSP3_1q42.12	-2.43013	9.25416	-10.6203	-22.1946	-8.09206	0	-27.1896	-20.3786	19.4756	0	-18.2442	0	-27.8951	19.7216	-12.1545	-8.99761	-37.1631	13.0575	-1.52917	11.0506	0	-20.3072	-19.3534	-21.8794	-24.9588	0	-38.5193	-11.776	-7.98396	-22.7401	-13.4753	-23.0332	-20.8514	-2.56412	-36.178	0	-12.8166	-22.193	5.81088	0	-16.9991	-17.616	-20.9522	-14.7202	23.3349	18.8341	-36.4663	-34.8938	-32.3576
HUERSP3_1q44	-4.16932	20.0446	0	-42.5476	-13.6411	15.6715	-25.6969	-37.4252	17.7964	-3.34319	-31.953	-21.6686	-57.9666	15.692	-21.2075	-41.9556	-78.4734	14.1263	-14.1718	0	0	-47.8811	-62.968	-43.5602	-38.1253	11.5055	-55.5113	-54.1803	-19.2598	-49.3995	-26.7777	-59.3276	-35.8765	0	-56.5428	-10.9412	-27.6354	-56.0534	13.752	12.5874	-22.1445	-50.7866	-47.9056	-30.4077	18.859	21.8883	-76.7832	-67.1626	-53.6222
HUERSP3_2p13.3	-5.98628	10.6476	-32.3954	-62.6861	0	6.38962	-47.5842	-63.4846	19.1768	-3.51329	-50.4424	-33.9196	-85.2586	21.4375	-35.0883	-57.7271	-132.028	17.9182	-12.1508	9.12722	-17.153	-79.2881	-96.0199	-64.906	-66.9245	0	-109.493	-76.6734	-33.7377	-70.0099	-42.9813	-69.6169	-68.3955	-5.50663	-92.2732	-8.2224	-45.0371	-81.5031	7.43982	0	-32.388	-74.7897	-80.4909	-47.6257	41.788	29.0069	-132.054	-103.734	-95.5763
HUERSP3_2p23.1	0	-0.152528	0	-2.22366	0	0	-1.99832	0	0	0	0	0	0	0	0	0	-2.03043	1.83861	0	0	0	0	0	0	0	0	0	0	0	0	0	0	-1.14384	0	0	0	0	0	0	0	-0.74044	0	0	0	-0.739068	-0.163369	0	-2.91168	0
HUERSP3_2p25.2	0	0	0	-14.9738	0	7.05308	0	0	8.53935	0	0	-14.3139	-20.6615	0	0	0	0	3.98904	-6.55613	0	-8.46112	-17.3788	-26.0068	-19.6618	0	0	-33.0746	-25.9719	-11.4705	-31.2882	0	-24.5457	-19.41	0	-23.328	-5.85357	0	-23.6408	1.14581	0	0	-21.9147	0	0	0	6.59245	-39.4896	-25.3118	-32.1581
HUERSP3_2q24.2	-5.71006	23.083	-18.0631	-50.383	-12.8148	19.9938	-22.6158	-41.275	30.9981	-3.65139	-28.1533	-32.0431	-71.7786	31.2858	0	-41.9743	-86.5609	24.1343	-12.8941	11.634	0	-49.0532	-75.8602	-43.7295	-38.4868	16.662	-60.5717	-68.1565	-30.8082	-54.8212	-21.1405	-66.5374	-44.7296	-3.92951	-57.3485	-9.66925	-31.0791	-63.5516	14.3982	17.5997	-19.776	-57.0752	-45.004	-25.7081	23.6405	28.5452	-93.2449	-74.7499	-52.3138
HUERSP3_5q21.2	-0.385892	0	0	0	-6.6787	1.94547	0	0	0	-0.905599	0	0	0	0	10.26	0	0	0	0	0	3.66568	0	0	-5.41125	0	6.87673	0	0	0	0	0	0	0	0	0	0	0	-8.25634	0	0	0	0	0	0	0	0	0	0	0
HUERSP3_7q11.21a	0	0	0	0	0	0	0	0	0	0	0	2.21309	0	0	0	0	0	0	0	0	0	0	0	0	0	0	0	0	0	0	0	0	0	0	0	0.484731	0	0	0	0	0	0	0	0	0	0	0	0	0
HUERSP3_7q31.1	0	0.415944	0	0	0	0	0	0	0	0	-0.291674	0	-2.0391	0	0	-0.183813	-2.14934	0	0	0	-0.0601205	0	-0.345753	0	0	0	-2.07684	0	0	0	0	0	0	0	-2.12316	0	0	0	0	0	0	0	0	0	0	0	-2.32194	-2.60512	-0.305722
HUERSP3_8q11.1	-1.31274	0	0	0	-1.15951	5.40721	0	-8.04901	0	-0.795644	0	-6.25867	-7.64591	0	0	0	-8.77595	0	0	0	0	-7.92552	0	-14.7745	-7.00689	0	-13.7386	0	-4.33636	-8.6221	0	-6.17816	-5.2865	-1.2922	-13.759	0	0	-12.8568	0	0	-6.82847	-10.909	-8.90362	0	0	0	-11.8696	-13.9124	-9.76901
HUERSP3_Xp11.21	0	7.14615	-14.0983	-39.8441	0	6.04328	-27.9329	-32.576	16.4489	0	-31.7684	-17.0261	-38.6516	16.8771	-18.4797	-28.7247	-74.5047	8.3982	-8.80145	14.4612	-11.4	-52.4118	-49.4419	-37.4319	-37.2966	6.00353	-67.971	-39.6582	-18.8638	-48.5243	-19.6524	-44.8755	-42.0107	-4.01972	-63.8646	-4.92739	-24.2553	-43.168	6.43335	12.3696	-17.8123	-43.2133	-47.6984	-32.6806	35.171	23.2024	-74.0778	-62.5174	-65.3377
HUERSP3B_11p12	-4.19706	13.0886	-29.9102	-56.7859	-9.13454	16.7416	-39.1805	-59.835	25.6003	-2.71517	-46.9356	-28.5504	-76.3938	26.0956	-31.4396	-51.692	-121.915	24.9212	-10.1287	11.639	-19.7569	-73.4963	-82.1365	-59.0012	-62.0548	10.4278	-110.06	-67.3608	-29.3959	-58.9984	-39.2591	-64.8342	-61.3537	-3.28643	-88.8032	-7.58618	-40.3094	-72.7518	4.9902	11.5095	-33.5658	-69.3334	-81.4422	-43.8126	32.176	25.4979	-122.397	-99.0887	-95.1508
HUERSP3B_1p33a	-6.50244	28.5617	-25.0836	-64.1714	-11.1657	20.3322	-34.1095	-55.7385	27.3714	-5.29399	-32.5097	-42.223	-81.1097	27.1341	0	-55.1631	-111.253	28.3979	-15.1978	0	0	-62.217	-94.3574	-64.0242	-56.4962	15.7733	-89.1796	-85.7973	-38.264	-61.8864	-33.0384	-78.5353	-54.794	-7.65353	-77.1292	-12.9554	-38.6259	-84.2434	15.4442	15.5024	-42.2714	-83.0178	-65.9457	-34.1746	28.2878	34.2806	-123.831	-94.2248	-74.1698
HUERSP3B_1p35.1	-1.11894	0	0	0	-3.81411	0	0	0	0	0	-6.03297	-2.89585	-10.2843	0	0	-4.78638	-7.84878	0	0	0	0	-4.15317	-6.96393	0	-6.33053	0	-9.44638	-6.99484	-4.99313	-11.4111	-3.8702	-11.809	-4.26146	0	-11.7432	0	0	0	0	4.12653	0	-4.00599	0	0	0	0	-14.2668	-7.72996	-9.30832
HUERSP3B_1q24.2	-1.44139	0	0	-7.89482	0	0	-10.4401	0	0	0	0	0	-9.57099	0	0	-4.78903	-8.57788	4.88631	0	0	0	0	0	0	-7.63325	0	-8.78019	-5.35448	0	-9.12393	0	-11.6457	0	0	-11.3523	0	0	0	0	5.60032	0	0	0	0	0	0	-13.6358	-10.8321	0
HUERSP3B_1q32.2	-0.989515	0	0	-2.95415	-1.88795	0	0	-2.59861	0	0	-3.091	0	0	0	0	0	-2.84371	0	0	0	0	0	0	0	-2.4387	0	0	0	0	0	-2.94975	0	0	-1.0446	-4.79575	0	0	0	0	0	0	0	0	0	0	0	0	-3.89745	0
HUERSP3B_22q12.1	0	0	-5.94648	-8.07161	0	0	-8.30359	-4.40092	0	0	-4.66576	0	-4.49662	0	-4.29792	-4.60781	-3.59975	0	0	0	0	0	-4.57382	0	-4.38243	0	0	-4.28703	-5.16718	-4.56103	-5.17856	-4.44872	0	0	-4.30287	0	0	-4.27682	0	0	0	0	0	0	0	0	-4.55971	-4.50766	0
HUERSP3B_2q35	0	0	0	0	0	0	0	0	0	0	0	0	0	0	0	0	0	0	0	0	0	10.4562	0	5.6156	6.30345	0	0	0	0	0	0	0	0	0	0	0	0	0	0	0	0	0	0	0	0	0	0	0	10.5455
HUERSP3B_3q13.11	0	0	0	-13.6609	-6.05927	0	0	-21.6771	6.42399	0	0	-9.73558	-23.5355	8.21179	-15.561	-13.3448	-30.017	0	-7.98795	6.38156	0	-19.5164	-18.9993	-24.1936	-21.1945	0	-34.784	-18.0873	-9.38413	-22.0915	0	-17.6915	-19.2687	0	-32.0655	-4.67691	0	-28.747	3.88132	0	0	-22.459	-19.9668	0	12.5936	6.77634	-38.7422	-34.1571	-31.6045
HUERSP3B_3q28a	0	12.3641	0	-25.6505	0	10.6128	-21.0812	-22.816	10.0384	-3.54785	-19.5247	-11.1432	-30.5186	13.1355	0	-20.0866	-44.8758	13.6969	-9.66014	0	0	-26.3452	-33.9308	-26.6164	-21.9253	9.62849	-26.3207	-28.6612	-10.8935	-23.0677	0	-28.4042	-20.7089	-1.8622	-31.4305	-4.49605	-16.2484	-33.0719	7.41867	9.94158	-15.1748	-27.3884	-24.7138	-17.3854	0	0	-42.8079	-36.962	-27.946
HUERSP3B_7p21.3	0	0	0	0	-5.18936	0	0	0	0	-2.33042	0	0	-12.6595	0	0	0	0	0	-2.56476	5.24624	7.66639	0	0	0	-12.7223	0	0	0	0	0	0	0	0	0	0	0	0	0	0	0	0	0	0	0	14.9236	10.924	0	0	0
HUERSP3B_9p13.3a	-1.78569	5.48303	-9.11773	-10.8808	0	0	-15.3612	-11.3351	9.30743	-1.34521	0	0	0	9.02347	-9.6184	0	0	0	0	4.56506	0	0	0	0	-9.14444	0	0	0	0	0	-9.76622	0	0	0	0	0	0	-11.6109	0	0	0	0	0	0	0	7.03567	0	0	0
HUERSP3B_9p13.3b	0	0	0	-9.87305	0	0	-9.55001	0	7.03562	0	0	2.80548	0	6.24004	0	0	0	0	0	2.54453	0	0	0	0	0	0	8.3844	0	0	0	-5.19145	0	0	0	0	0	0	0	0.0161674	1.4584	0	5.82351	0	0	4.15625	3.77397	0	0	8.73
HUERSP3B_Xq13.2b	-2.08312	4.92749	-23.9703	-40.1757	0	10.197	-38.6659	-50.8145	11.9256	0	-45.6608	-11.1059	-64.8488	8.34894	-34.9912	-34.6949	-90.3145	10.167	0	10.8243	-17.2597	-53.3349	-52.3151	-45.2789	-52.4933	0	-85.7635	-44.1809	-22.0323	-47.9549	-32.9938	-46.6215	-42.8698	0	-81.3561	0	-23.2531	-54.8992	0	0	-19.581	-36.9418	-51.4866	-31.4594	18.1201	20.1123	-93.1061	-74.0068	-76.8701
HUERSP3B_Xq21.33	-2.86877	0	0	-35.456	0	0	0	-24.2759	0	0	-17.4551	-12.7521	-33.7615	0	-21.9495	-33.7831	-38.6101	0	-5.33191	0	0	0	-35.3854	-16.4555	-23.4734	5.79016	0	-36.561	-20.6783	-22.558	-18.3731	-26.8653	0	0	-27.3973	-6.34784	0	-31.2119	0	0	-14.4145	0	0	0	0	13.792	-38.6259	-27.996	0
LTR19_12p13.31	0	11.4062	0	-12.52	0	7.58421	0	0	0	0	0	0	0	0	0	-14.1359	0	6.00008	-6.54016	0	-7.38938	0	-23.3769	0	0	0	0	-18.2365	-8.92853	0	0	-17.3778	0	0	0	-5.29594	0	0	2.04184	10.1849	0	0	0	0	0	6.52438	-22.8435	0	0
LTR19_4q35.1	-4.80023	0	-25.6465	-44.3373	0	13.8521	-34.9735	-45.4081	13.582	-2.97287	-34.8162	-14.3248	-60.1718	0	-25.5169	-38.6162	-79.329	16.1647	-5.77705	10.8286	-9.28572	-46.9069	-58.6648	-39.078	-45.5482	7.60034	-69.3165	-47.7877	-24.7042	-40.8193	-30.0672	-45.3811	-41.248	-3.35705	-68.9842	0	-31.8848	-51.7057	0	0	-23.0925	-45.8282	-53.9371	-29.5997	22.6508	20.8615	-82.0378	-71.5407	-59.9177
LTR19_6q25.3a	0	2.8558	-7.15596	-13.5595	-2.61986	0	-10.0762	-15.5479	4.04422	0	-12.7998	-4.42832	-22.4761	0	-12.9474	-15.6892	-36.3531	0	-1.36908	2.22247	0	-22.5454	-22.4249	-14.425	-17.4802	0	-34.4491	-17.3766	-5.39952	-13.0393	-9.72386	-11.8002	-16.9742	0	-23.8444	-1.02566	-9.9205	-18.0599	0	0	-9.19034	-13.9066	-18.571	-12.5427	9.41667	6.8689	-35.1442	-26.6169	-27.0511
LTR19_9q34.11	0	0	0	0	0	0	0	0	0	0	0	0	0	0	0	0	0	0	-1.63534	-1.29999	0	0	0	0	0	0	0	0	0	0	0	0	0	0	0	-3.29309	0	0	0	0	0	0	0	0	0	0	0	0	0
LTR23_1q41	-1.16712	0	0	0	1.71979	0	0	0	0	0	0	3.0044	0	0	0	0	0	0	0	0	-3.07696	0	6.0437	0	0	0	0	2.7649	0	0	0	0	0	0	0	0	0	0	0	0	0	5.81338	0	0	0	0	0	0	0
LTR23_4p16.3a	0	0	0	0	0	0	0	0	0	0	0	0	0	0	9.11337	0	0	0	0	0	0	0	0	0	0	4.16911	0	0	0	0	0	-6.0745	0	0	0	0	0	-7.70138	0	6.86875	0	0	0	0	0	0	0	0	0
LTR23_4p16.3b	-0.949921	9.59356	0	-15.5986	0	6.48688	0	-20.061	10.1512	-1.91256	-25.594	-13.9899	-30.2922	0	0	-11.8452	-33.1819	6.94461	-4.0336	0	0	-21.8379	-32.3544	-37.8963	-12.7187	5.10122	-23.083	-23.3547	0	-24.6412	0	-28.3431	-13.506	0	-29.4961	-5.08251	0	-43.6241	0	0	0	-40.2833	-18.9737	-13.7262	0	0	-34.9165	-27.4619	-19.8042
LTR23_9q22.33a	-2.57098	0	-17.3022	-36.394	-6.96534	0	-39.8658	-41.7767	9.36845	-2.27164	-37.9556	-17.1511	-49.2289	12.0542	-31.2232	-25.0613	-71.4786	10.0009	0	5.52748	-10.9514	-45.2985	-44.7387	-48.3152	-38.2171	0	-64.609	-37.3168	-16.0086	-42.7565	-25.3839	-39.5212	-37.8198	-2.72136	-63.3356	0	-27.8105	-51.4336	0	0	-19.816	-43.3507	-44.0271	-32.9095	19.0991	15.0899	-76.0254	-63.7289	-59.02
LTR23_9q22.33b	0	0	-19.9576	-36.4795	-6.34264	3.6618	-36.6668	-44.7434	5.87344	-1.6974	-40.2634	-20.9837	-55.6588	0	-33.942	-29.072	-88.3598	5.5079	-4.70609	4.44748	-12.7461	-51.5264	-53.1445	-51.3582	-41.4305	0	-76.3441	-44.0952	-19.7259	-50.5592	-26.4049	-44.8692	-45.329	-2.77834	-70.8063	0	-27.8184	-56.403	0.265848	0	-18.5215	-49.8534	-52.3016	-37.6198	14.4777	14.4766	-88.1448	-68.6427	-68.9713
LTR25_11q24.3b	-3.88345	0	-8.95597	-18.9084	-2.73098	0	0	-17.5302	5.47094	-1.77902	0	-9.90704	-31.1189	0	0	-25.2337	-29.7876	0	-5.89909	5.2505	0	-11.9489	-25.6944	-17.9982	-15.9063	0	-14.302	-24.2259	-10.0401	-15.2657	-10.7541	-19.1592	0	0	-27.297	-5.53429	0	-28.6293	0	0	0	-19.8109	-17.9154	0	10.7802	12.2003	-35.1926	-24.0561	-14.4597
LTR25_12p11.22a	-2.08579	0	0	0	-4.83596	4.19557	0	-7.88793	0	0	-8.55238	-3.47336	-6.93473	0	-7.42976	-4.56641	-10.305	-2.62035	0	0	0	-9.83413	-7.97362	-7.90408	0	0	0	0	-5.19255	0	-5.75772	-7.12729	-7.74663	0	-9.08378	0	-7.60322	0	0	0	-4.59629	-8.64634	-10.8864	-7.04505	0	0	-10.5707	-12.6002	0
LTR25_12p11.22b	0	12.3169	0	-21.6573	0	10.5399	0	-16.7697	0	0	0	-23.1072	-27.6183	0	-13.7912	-17.4345	-33.1071	0	-6.584	0	-7.77957	-24.9975	-36.2637	-20.1479	0	0	-40.8025	-31.8973	-12.6412	-32.7157	0	-29.2046	-23.1579	0	-33.8625	-5.25638	0	-24.9481	1.69811	0	0	-28.8843	-30.1599	0	16.3973	0	-49.216	-34.3874	-36.3324
LTR25_1q22	-3.50755	0	0	0	-4.21614	0	0	0	0	-1.57189	0	0	-16.165	0	0	0	0	0	0	0	7.51179	0	0	0	0	0	0	0	0	0	0	0	0	-3.36799	0	0	0	0	0	0	0	0	0	0	0	0	0	0	0
LTR25_21q22.11	-2.96812	13.3816	-19.7891	-41.3707	0	26.7416	-24.6948	-41.1663	13.731	-4.5709	-29.7412	-16.1934	-53.8458	10.0994	-19.5092	-41.1889	-71.9229	0	-10.3279	0	-12.894	-41.7694	-50.5784	-40.5677	-42.4168	7.66456	-66.9412	-47.3476	-21.5103	-39.822	-24.6756	-43.5927	-37.6676	-2.86235	-62.6808	-6.89553	-22.6507	-53.68	6.59187	0	-15.5625	-37.2612	-52.9961	-25.7888	0	19.6764	-78.4685	-67.368	-62.9995
LTR25_2p13.3	-6.45819	31.8315	-23.7232	-61.8804	-13.9035	17.8024	-35.5854	-52.8713	38.1462	-6.80403	-37.8285	-40.7617	-83.7175	42.583	-28.3239	-56.2003	-118.196	27.6432	-11.3443	10.7903	-18.1364	-73.7758	-96.7572	-64.4093	-62.36	11.4185	-103.563	-85.4729	-35.0105	-74.3953	-33.1867	-81.4597	-60.6434	-8.06242	-78.299	-6.33756	-34.3676	-79.1824	11.0401	12.8734	-32.5951	-77.429	-69.8618	-41.827	41.9734	29.7454	-132.123	-94.5039	-88.3858
LTR25_3p22.1	-6.33415	24.2561	-22.0931	-57.0189	0	11.6401	-31.3949	-47.2022	37.1011	-4.19087	-36.6778	-34.5387	-74.8483	43.3162	-23.7714	-53.2566	-107.585	27.8404	-10.0469	19.4657	-16.0218	-59.1756	-84.1143	-45.9309	-57.6642	9.64798	-92.9226	-72.7529	-35.5183	-62.6807	-29.5122	-65.8748	-46.8482	-5.74621	-74.0583	0	-27.5431	-60.6672	9.39651	10.2635	-29.6238	-62.4394	-64.2285	-33.3584	39.5546	31.6472	-117.939	-81.6584	-87.6501
LTR25_3q26.33a	-1.23213	0	0	0	0	0	0	-10.6792	0	0	0	-12.3074	-17.8945	0	0	-17.9812	-18.6164	0	0	0	0	0	-22.9895	-11.8884	-10.6175	0	0	-21.425	-11.5738	-22.631	0	-21.9753	0	0	-17.6285	0	0	-13.1311	0	0	0	-13.4618	0	0	0	0	-24.1658	0	0
LTR25_6q24.1	-1.30187	0	0	0	0	0	0	0	0	0	0	0	0	0	0	0	0	0	0	3.69618	2.6994	0	0	-10.249	0	0	0	0	0	-11.2502	0	-18.2786	0	0	-13.8787	0	0	-8.27816	0	0	0	0	0	0	0	6.12361	0	0	0
LTR25_7q21.12	0	15.2452	-14.8016	-35.4386	-9.20133	20.3146	-33.4261	-30.1475	19.2533	-3.41497	-31.5312	-13.3321	-46.864	18.9181	-22.4557	-19.7856	-55.7764	10.572	-7.66818	0	0	-36.5935	-39.9957	-41.2997	-30.8262	5.4102	-53.0514	-31.2806	-15.9492	-37.5739	-14.9523	-35.496	-35.3863	0	-47.2423	-7.05731	-24.505	-45.3733	4.81579	0	-12.7391	-45.0207	-40.4216	-29.8312	0	9.82667	-65.9864	-56.2232	-49.2967
LTR25_7q36.1	0	10.1057	0	-31.2127	0	12.3245	0	-27.0754	16.4801	-3.22298	0	-19.5304	-33.8617	19.7592	0	-20.937	-52.4001	11.1238	-8.70447	8.94289	0	-40.1296	-43.7544	-33.0726	-28.3199	9.40956	-43.2508	-36.9907	-16.25	-36.751	0	-37.1923	-33.5004	0	-42.4843	-6.03237	-20.2437	-46.8863	6.84244	15.919	-14.0046	-42.4937	-32.5965	-19.4684	22.0317	17.9123	-53.0205	-49.5886	-42.7987
LTR25_Yq11.223d	0	0	0	0	0	0	0	0	0	0	0	0	0.456612	0	0.0027594	0	0	0	0	0	0	0	0	0	0	0	0.00600418	0	0	0	0	0.394822	0.476928	0	0	0	0	0	0	0	0	0	0	0	0	0	0	0	0.006231
LTR46_11q21	-1.22329	0	0	0	-1.35825	0	0	0	0	0	0	0	0	-2.64342	0	0	0	0	0	0	0	2.58231	0	0	0	0	0	0	0	0	0	0	0	-1.38025	0	0	0	0	0	0	0	0	4.48244	1.8673	0	0	0	0	0
LTR46_16q23.1	-2.64153	7.48488	-11.9594	-22.5334	0	7.473	-24.1284	-27.0756	13.9896	-2.62022	-25.5114	0	-25.9248	16.0134	0	-12.0505	-50.1187	15.5504	-5.74887	7.16676	-7.17478	-35.7438	-26.5253	-33.3654	-28.8264	8.28468	-43.6027	-20.7962	-8.87767	-24.9273	-16.668	-27.9057	-31.9441	-2.44625	-42.1959	0	-22.9472	-32.3444	5.4765	10.7116	-14.9392	-27.611	-31.0267	-24.813	0	16.6198	-41.3487	-43.8815	-41.2582
LTR46_6p22.2	0	0	0	-16.6093	0	0	0	-13.7947	0	0	0	-7.04493	-19.6336	0	0	-17.4982	-27.3497	0	-3.20099	0	0	-18.6574	-26.0633	-11.2108	-12.3178	0	-19.7133	-18.8508	-7.19757	-11.8095	-9.74555	-12.9194	-14.5502	0	-21.9235	0	-11.085	-18.3996	0	0	-7.43471	-16.5429	-18.6732	0	13.9717	0	-25.5106	-20.6797	-17.9506
LTR57_14q32.33a	0	0	0	0	0	0	0	0	0	-3.10819	0	0	0	0	0	0	18.6078	0	0	3.6162	15.823	23.2045	11.1142	0	0	0	30.9528	0	0	0	0	0	11.5051	0	0	0	0	0	0	0	0	0	23.4382	0	0	0	17.2737	0	30.5812
LTR57_18q21.1	0	0	-19.0255	-31.6806	0	0	-19.7788	-31.7761	0	0	-26.4212	-18.2328	-46.7484	0	-19.5001	-37.1954	-67.0778	0	-8.157	9.44396	-12.7323	-40.7038	-51.2872	-28.3538	-34.6616	0	-58.4755	-38.8381	-20.4245	-36.1009	-26.4483	-38.2331	-32.4876	0	-50.5769	-5.37383	-23.4165	-37.9827	0	0	-19.4461	-34.9922	-45.3103	-23.6782	21.7445	20.9167	-68.3474	-50.8418	-48.0998
LTR57_22q11.21	-4.43914	11.6801	0	-24.4903	-12.0628	9.85151	0	-19.2813	13.7745	-3.42525	-18.6388	-21.392	-49.0764	0	0	-35.3983	-48.0433	11.6724	-20.1209	0	5.30851	-24.0238	-48.8305	-28.3019	-21.551	10.3482	-21.585	-42.5876	-24.3418	-30.836	0	-46.4331	-21.0704	-3.60963	-27.2196	-14.2268	-17.7858	-37.8893	10.8136	16.0973	-14.3017	-41.4707	-20.9241	0	0	14.223	-54.2409	-38.9104	-18.729
LTR57_2q37.1	-1.95311	0	0	-26.5857	0	0	0	-20.3496	0	-1.26718	0	-22.5954	-39.7384	16.3916	0	-27.6658	-51.3178	8.01189	-6.42065	0	0	-27.5533	-45.3864	-23.6606	-21.0449	6.71966	-39.5934	-40.7642	-18.4867	-32.7224	0	-38.7208	-20.4005	0	-33.6554	0	0	-32.604	5.91527	8.62121	0	-35.5104	-29.5192	0	0	11.2858	-53.8579	-36.6799	-31.5531
LTR57_5p12a	0	0	0	-15.0717	0	0	0	0	0	0	0	0	-12.0333	11.5219	0	0	0	1.69378	0	0	0	0	0	0	0	0	0	-12.4119	0	0	0	0	0	0	0	0	0	-11.7872	3.86476	0	0	-13.637	0	0	0	0	0	0	0
LTR57_5p12b	-1.80191	9.80509	0	-10.6875	-7.78646	5.53349	0	0	13.146	-1.37903	0	0	-15.5947	15.0409	0	-7.07293	-16.0669	11.6928	0	0	0	0	-9.70857	-13.157	-11.0164	0	-13.6555	-11.4003	0	-15.4876	0	-12.3765	0	-1.95727	-15.4012	0	0	-15.5496	4.10467	0	0	-11.0443	0	0	0	3.29522	-20.971	-13.6354	-17.6143
MER101_10q11.22d	0	0	0	0	0	0	0	0	0	0	0	0	0	0	0	0	0	0	0	0	0	0	0	-9.6148	0	0	-15.2014	0	0	0	0	0	0	0	0	0	0	-11.2801	0	0	0	0	0	0	0	0	0	0	0
MER101_10q23.33	-3.5587	2.77434	0	-9.54266	-5.10713	0	-9.02332	-4.31748	3.30592	-1.609	0	0	0	0	0	0	-9.31921	0	0	0	0	0	0	0	-5.22297	0	0	-4.3548	0	0	0	0	0	-2.59678	-7.97098	0	0	0	0	0	0	0	0	0	0	0	0	-7.11232	0
MER101_12p13.31b	0	10.9509	-13.6661	-19.0699	0	0	0	-21.8358	0	-4.04989	0	-12.0347	-31.3021	0	-16.386	-20.8272	0	0	-4.92965	0	13.2545	0	-27.1304	-28.3475	-13.6811	0	0	-23.6452	-18.6318	-18.0618	-10.8659	-22.2851	0	0	0	-6.55869	0	-45.2906	0	0	0	-27.9749	0	0	9.79491	8.19412	-28.163	-24.7446	0
MER101_12q13.3	0	0	0	0	0	0.0165356	0	-1.23251	0	0	-3.25848	0	0	0	-2.42506	0	0	0.00639046	-0.184097	-0.150858	0.0193137	-1.60666	-1.38155	-2.80782	0	0.0400386	-1.57601	-1.07819	0	-3.28396	0	-2.59601	0	0	-3.71789	-0.184675	-0.550627	-1.10604	0.00404085	0	0	-0.577598	-0.629021	-2.92844	0	0	-2.25069	-1.90255	-0.631595
MER101_15q12	0	0	0	-5.33155	0	0	-6.34171	-6.21325	0	0.418131	0	0	-8.10727	5.59485	0	0	-15.3128	2.15393	0	0	-3.22034	-9.24809	-8.80915	-8.14385	0	0	-12.1885	-8.4854	0	-8.27641	0	0	-7.42159	0	-12.9265	0	0	-9.37643	0.626526	0	0	-9.22169	-9.91009	0	7.34724	0	-15.7821	-9.80643	-12.8259
MER101_15q15.2	0	0	-10.7809	-9.47138	0	0	-15.882	-23.8862	0	0	-18.3817	-6.21214	-26.5259	0	-16.195	-12.675	-45.1837	0	0	2.89809	-13.2412	-32.9889	-22.548	-24.0721	-26.4621	0	-53.2072	-19.1231	-8.68809	-23.7252	-16.332	-22.4139	-25.4757	0	-37.9251	0	-13.9037	-26.2963	0	0	-11.4804	-14.5985	-31.4426	-17.7057	8.24255	10.5411	-45.4663	-35.8486	-45.6187
MER101_18q21.1a	-2.09563	0	-18.1207	-38.8285	0	0	-19.7102	-36.8029	18.4477	0	-25.038	-27.1558	-57.8254	20.6791	-17.9011	-43.1596	-78.0811	0	-9.60108	9.578	0	-44.515	-67.3805	-33.58	-39.1968	8.07095	-62.7338	-56.7219	-26.7077	-46.9586	-27.7901	-49.8167	-37.2305	0	-58.1654	-5.38758	-21.6149	-44.8533	0	11.2347	-18.6114	-45.9631	-47.0446	-27.0906	20.8114	24.2064	-82.476	-62.4053	-53.6204
MER101_18q21.1b	0	0	-16.173	-33.301	0	0	0	-34.9662	16.6565	0	-21.4742	-22.4725	-56.1396	0	0	-39.7454	-62.0471	0	-6.17625	0	0	-31.9695	-54.8868	-30.6314	-38.3633	7.97196	-59.1606	-47.43	-24.6161	-36.8091	-25.1008	-48.5579	-30.0882	0	-50.1484	-3.33522	0	-44.5116	0	12.6193	-19.5206	-38.611	-38.2514	0	17.0109	21.9936	-76.3945	-56.1936	-51.2592
MER101_19q13.2c	0	11.668	-21.4614	-38.5544	-8.31783	6.27059	-23.7119	-49.6848	13.6879	0	-33.6552	-28.2407	-63.4844	13.1248	-36.0798	-38.8802	-85.4546	0	-7.687	11.5984	-12.4073	-48.9526	-62.932	-52.271	-46.0322	0	-73.5088	-53.3753	-26.3524	-55.0679	-26.5632	-54.1368	-41.0662	-2.47629	-63.7203	-5.07795	-26.6795	-67.0583	0	0	-24.9181	-54.9112	-51.3574	-37.1135	30.176	20.7115	-91.1936	-62.5656	-64.808
MER101_1p22.2a	0	4.88773	0	-22.8322	-10.2151	9.91773	-18.0329	-25.1964	12.6732	-2.30317	-16.2782	-16.2356	-29.7316	0	-18.0031	-14.9984	-42.629	5.19076	-6.40143	5.97589	-12.9565	-36.7784	-36.7536	-28.7269	-24.198	0	-53.1327	-27.7826	-12.8321	-33.4488	-15.059	-27.7152	-27.6296	-3.70781	-34.9028	0	-16.0472	-33.0308	0	0	0	-31.0509	-33.2954	-21.4161	0	7.93462	-51.622	-39.3474	-47.6442
MER101_1p22.2b	0	0	-8.29318	-16.152	0	6.5133	-17.0913	-16.744	5.92219	0	0	0	-20.7307	0	-16.035	0	-32.8829	8.43344	-5.69967	4.85218	-13.9657	-29.9971	-22.4265	-19.5186	-18.223	0	-48.7413	-18.3564	-6.2454	-23.1168	-10.0937	-15.1128	-24.1434	0	-30.1846	-1.88798	0	-25.4368	0	0	0	-23.38	-32.5492	-13.545	13.9413	11.4324	-41.0651	-30.3995	-42.1385
MER101_1p31.3	-3.98569	13.83	-14.6872	-28.5824	0	12.5945	-29.3314	-35.0543	0	-3.57434	-28.2806	-16.3104	-44.2107	0	0	-26.1023	-68.5236	8.5161	-9.94805	13.0664	-12.4607	-51.1146	-53.2747	-42.3072	-38.5983	9.97906	-71.6312	-42.9844	-15.1249	-44.1869	-22.4236	-43.415	-42.6415	0	-64.4872	0	-29.6719	-52.3156	9.97068	12.2205	-20.4373	-47.0562	-54.7662	-28.3041	24.749	24.9987	-76.8554	-70.7795	-64.8768
MER101_1p35.2	-4.05695	19.3021	0	-48.4653	0	8.60894	0	-42.2698	21.7242	-3.19652	-28.0816	-38.7687	-66.7782	22.4982	0	-47.1047	-91.7139	13.9442	-9.4767	0	0	-56.4471	-81.8054	-51.7294	-44.0516	10.4005	-70.6693	-67.848	-27.4466	-59.0867	-27.5349	-64.7133	-39.6479	-3.31477	-52.6454	-6.57287	-22.3196	-66.9212	10.5619	15.7871	-25.8198	-66.2086	-49.9176	-32.352	24.7525	26.3436	-97.6343	-70.5737	-57.5966
MER101_1q42.13a	-5.10884	0	0	-15.1855	-3.66934	0	0	0	0	-3.73207	0	0	0	0	0	0	0	0	-7.32626	0	14.8996	0	0	0	0	5.06463	0	-14.0714	0	0	0	-13.7962	0	-3.37257	-23.5925	-7.28249	0	-19.4219	0	0	0	0	0	0	0	9.98154	0	-23.851	0
MER101_22q12.3	-1.29116	0	-11.7493	-20.5141	0	0	-17.7552	-18.0067	11.3329	0	-14.5408	0	-19.2749	12.0124	0	-15.0636	-30.2075	9.38111	0	11.8733	0	-17.8936	-22.0361	-13.525	-19.7668	2.46696	-33.6777	-14.078	-11.4822	-14.3111	-15.8161	-18.8865	-13.8154	0	-25.3892	0	-13.569	-21.8387	0	0	-16.7076	-13.1636	-24.8241	0	19.2738	17.3436	-33.3438	-28.7544	-26.0144
MER101_2p16.1	0	0	-3.28821	-3.28188	0	0	0	-4.28619	0.560375	0.0418359	-3.32649	0	-8.52882	0.426033	-3.29936	0	-4.4855	0	0	0	0	0	0	0	-4.59962	0	0	-3.38489	0	0	-3.3372	-4.58012	0	0	0	0	0	-3.63036	0	0	0	0	0	0	1.60464	0	-3.7802	-3.86949	0
MER101_2q13a	0	0	0	0	0	0	0	0	0	0	0	0	0	0	0	0	2.19347	0	0	0	0	0	0	0	2.20637	0	0	0	0	2.11242	0	0	0	0	2.19607	0	0	0	0	0	-0.00470568	0	0	0	0	0	2.13914	2.19027	0
MER101_2q13b	-1.8774	0	0	0	-6.5856	0	0	0	0	-1.1406	0	0	-10.9227	6.20034	0	0	-12.0953	1.79247	0	0	0	0	0	0	-9.6619	2.863	0	-6.16237	0	0	0	-9.64788	0	-2.11385	0	0	0	0	0	0	0	0	0	0	0	0	-12.5679	-11.1246	-10.6196
MER101_2q35a	0	0	-25.8538	-56.8814	0	0	-31.5683	-52.369	9.48776	-3.02519	-37.7631	-45.9272	-92.1793	12.1815	-35.5625	-66.8069	-112.214	0	-8.3231	7.02697	0	-50.7446	-93.1715	-55.7349	-46.2885	0	-76.3426	-83.0295	-44.7268	-66.4404	-32.219	-68.8546	-46.4357	-2.59025	-71.7294	0	-31.8503	-63.9455	0	0	-30.4343	-64.5802	-55.1657	-36.412	0	16.5069	-119.748	-84.0288	-55.513
MER101_2q37.1	0	0	0	-17.0788	0	0	0	-15.3062	20.8415	0	0	-14.8556	-24.4404	24.4144	0	-18.6565	-30.9293	5.68854	-6.0825	0	0	-21.8789	-30.4421	-16.111	-13.0363	0	-30.9663	-22.613	-12.236	-20.679	0	-20.3334	-15.0466	0	-26.4842	0	0	-22.9436	4.94034	0	0	-25.4353	-21.4882	-11.2415	22.0695	11.2306	-36.6362	-23.2492	-22.6261
MER101_3q26.31	-1.04928	0	0	0	-10.0774	0	0	0	0	-1.43667	0	-3.64271	-13.0604	0	0	0	-13.904	7.68085	-6.16365	0	3.13176	0	-9.33785	-7.77665	0	0	0	-8.13825	0	0	0	-10.9805	0	-1.16285	0	-6.79699	0	-8.98169	0	0	0	-7.93573	0	0	0	7.83892	0	0	0
MER101_7q22.1a	-1.88145	0	0	-8.12677	-2.36829	0	0	0	0	-0.558563	0	-2.9404	-10.3527	0	0	-8.69876	-12.5871	0	0	0	0	0	-7.63134	-8.56002	0	3.84026	0	-10.5962	0	-6.63592	0	-8.35696	0	-1.55439	0	-2.27609	0	-16.6771	0	0	-5.09931	-7.09713	0	0	0	0	-8.51529	0	0
MER101_7q22.1b	-0.455999	0	0	0	0	0	0	0	0	-0.377824	0	2.05424	0	0	0	0	0	3.97038	0	0	0	5.4562	0	0	0	5.22381	7.6429	0	0	0	0	0	5.82911	0	0	0.448058	6.47253	0	0	0	0	5.40454	10.0565	4.84933	0	0	5.53708	0	5.49697
MER101_7q36.1a	-5.68524	17.4889	-13.2116	-39.9144	-9.18246	15.9662	-22.3039	-26.713	22.5431	-4.26228	-23.9818	-10.1796	-40.2856	0	0	-27.8938	-40.4066	17.2589	-10.878	9.30787	15.1155	-17.6924	-38.6193	-26.3944	-23.9431	9.01045	0	-34.6155	-14.567	-29.6472	-18.2093	-35.4237	-17.4142	-3.39617	-43.7333	-8.87944	-22.5041	-42.8618	10.5282	14.2536	0	-28.8666	0	-13.3701	18.5075	19.5489	-36.3163	-51.5824	0
MER101_8p21.3	0	7.73081	0	-15.9286	0	6.22349	-12.7768	-17.1471	14.7558	0	0	-6.71707	-20.1553	16.5724	0	-17.0218	-33.1147	10.5865	-2.72677	9.1811	0	-20.7385	-21.0603	-20.9309	-19.874	6.80908	-25.8679	-17.2968	-9.64178	-17.5415	0	-20.1132	-17.3824	0	-25.8084	0	0	-24.8826	5.5984	10.3342	-6.07843	-17.7046	-14.4993	-10.2428	18.4778	17.8416	-26.5379	-25.7678	-25.6804
MER101_8p23.3	-1.46731	0	0	0	0	0	0	0	-1.15371	0	-2.60327	0	-4.03921	-1.05388	-2.27473	0	-4.43624	0	0	0	-2.38779	-2.91476	-2.1999	0	0	0	-5.09433	-2.12119	0	-2.75406	0	0	-2.47175	0	-4.10122	0	-0.994077	0	0	2.25464	0	-2.07389	0	-1.51638	0	-0.208292	-4.67708	-3.73369	-5.79146
MER101_Xq23b	0	0	0	0	0	0	0	0	0	0	0	0	0	0	0	0	0	0	0	0	0	0	0	0	0	1.2014	0	0	0	0	2.80118	0	0	0	0	0	0	0	0	0	1.31326	0	0	0	0	0	0	0	0
MER34B_10q25.3a	0	0	-6.33532	-6.56479	0	0	-9.01903	-7.64337	0	0	0	-6.16099	-13.8606	0	0	-6.3067	-9.11743	0	0	0	4.27619	0	-11.9618	-8.63562	-5.41549	0	0	-8.73022	-6.46094	-7.87072	-5.02275	-8.23646	-5.4714	0	0	0	-5.60903	-8.87701	0	0	0	-11.1945	0	0	0	0	-11.3201	-8.69363	0
MER34B_11p15.5	0	7.96335	0	0	0	5.63032	0	0	8.67209	0	0	0	-8.44964	7.61331	0	0	0	4.01797	0	0	0	0	0	-11.4431	0	2.96704	0	0	0	0	0	0	0	0	0	0	0	-15.4867	0	0	0	-10.3372	0	0	0	0	0	0	0
MER34B_19p13.11	0	19.8621	0	-15.198	0	12.9113	0	0	14.1884	0	0	-18.9611	-23.9668	0	0	0	0	5.78901	0	0	0	-19.1331	-30.6784	-25.766	0	0	-31.9279	-32.1692	0	-35.7046	0	-25.278	-18.4937	0	-27.7243	-6.0821	0	-33.3823	2.36288	0	0	-32.9051	0	0	0	6.1404	-39.7204	-26.3432	-26.2302
MER34B_1p13.2	0	0	0	-8.90034	0	0	-6.05983	0	0	0	0	0	0	0	0	0	0	0	0	0	0	0	0	0	-4.09322	0	0	0	-4.12539	0	0	-5.04546	0	0	0	0	0	0	0	0	0	0	0	0	0	0	0	0	0
MER34B_4q21.22b	0	0	0	0	0	0	0	0	-0.201284	0	0	0	0	0	0	0	-6.27613	0	0	0	0	0	0	0	0	0	0	0	0	0	0	0	0	0	0	0	0	0	0	2.1567	0	0	0	0	0	0	0	0	0
MER34B_4q31.3	-6.02686	29.9178	-30.6878	-59.1443	-11.7959	29.928	-41.1695	-65.2388	36.1507	-6.73513	-49.6144	-37.6011	-88.9229	36.5567	-38.6684	-48.5128	-115.743	27.1446	-9.24872	15.3187	-10.4487	-76.8629	-95.5857	-80.0911	-67.8718	14.4659	-105.353	-81.4008	-35.4426	-81.9209	-34.5348	-83.0593	-69.9165	-4.84957	-96.4196	0	-38.3919	-96.3349	9.86911	16.0551	-32.2208	-81.9577	-74.9555	-48.3756	36.8019	33.5632	-140.462	-112.799	-93.0783
MER34B_6q14.2	0	13.4656	0	-26.9352	0	13.0491	0	-17.401	14.5811	-3.69135	0	-21.5151	-33.5615	14.432	0	-28.3111	-46.9204	6.8759	-6.77864	8.97839	0	-31.9781	-46.0192	-17.7573	0	0	-40.6165	-42.6443	-23.7349	-32.672	0	-33.8748	-24.7715	-3.97713	-37.2035	0	0	-26.1068	4.15075	0	0	-25.0665	-28.7073	0	32.5	20.4236	-54.7373	-33.1507	-32.2105
MER34B_7q11.23a	-2.24477	0	0	-13.6596	-5.92502	0	0	0	0	0	0	0	-14.4757	0	0	0	-14.2585	0	0	0	0	0	0	-9.33355	-13.2677	0	-13.3121	-8.12786	0	-14.879	0	-12.6293	0	-2.13142	-16.6774	0	0	0	0	0	0	0	0	0	0	0	-17.9764	-16.6762	-17.8038
MER34B_7q36.1	0	0	-9.58302	-19.5119	0	0	0	-19.8315	0	0	-17.8179	-20.266	-31.8598	0	-18.0783	-22.8243	-32.7679	0	-6.54135	0	0	-20.0976	-33.4172	-21.5742	0	0	-25.9481	-30.9888	-15.2812	-32.9472	-12.0754	-28.7727	-19.1512	0	-40.1972	-3.83222	0	-26.461	0	0	0	-30.6406	-26.4769	0	0	0	-41.7633	-33.8141	0
MER34B_9q22.31a	0	0	-3.18441	-3.25684	0	0	-4.12641	-3.04944	0	0	-4.76828	0	-3.38269	0	-3.91925	-1.82616	-4.40777	0	0	0	0	-4.28597	-4.48398	-4.2572	-2.07522	0	-6.19805	-3.67181	0	-5.14437	-5.14905	-6.54161	-4.13327	0	-10.5732	0	-5.08141	-3.43166	0	-2.64998	0	-4.53114	-7.29811	-3.58733	0	0	-8.47505	-9.73834	-3.92912
MER34B_9q22.31b	-0.992442	0	0	0	-3.86942	0	0	0	0	0	0	0	0	0	0	0	0	0	-1.33674	0	0	0	0	0	0	4.02315	0	0	0	0	0	0	0	0	0	0	0	0	0	0	0	0	0	0	0	0	0	0	0
MER4_10p12.33	0	0	-2.05105	0	0	0	-2.24066	0	0	0	0	0	0	0	-1.21327	0	0	0	0	0	0	-0.715803	0	0	0	0	0	0	0	0	-0.533089	0	0	0	0	0	-1.94509	0	0	0	0	0	-2.15761	0	0	0	0	0	0
MER4_10q23.31a	0	7.85741	0	0	0	0	0	0	0	0	0	0	0	0	0	0	0	0	0	0	16.6971	0	0	0	0	0	0	0	0	0	0	0	0	0	0	0	0	0	0	0	0	0	0	0	0	0	0	0	0
MER4_11q12.1e	0	0	-3.45257	-4.72376	0	0	-7.10355	-4.08365	0	0	-4.67469	-2.06295	-4.77935	0	-5.08603	-3.28958	-8.91063	0.602657	0	0.873475	0.26303	-5.69014	-7.13719	0	-2.94032	0	-4.61475	-5.24276	0	0	-2.66657	0	-7.20808	0	0	0	-9.04684	-5.32296	0	0.584866	0	-9.19907	-6.36434	-5.07731	0	0	-7.04224	-7.79073	-5.26724
MER4_11q21d	0	0	-11.3027	-12.8448	0	0	0	-13.7081	0	0	0	-7.3022	-16.5103	0	-8.64399	-16.6289	-21.0197	1.2045	0	4.0804	0	-12.5509	-19.9853	-9.3583	-13.5981	0	-18.5414	-15.4755	-12.7426	-12.9515	-10.6336	-13.6809	-11.039	0	-19.004	0	0	-14.0104	0	0	-7.42792	-11.0449	-13.8053	0	10.784	6.46846	-23.7923	-16.5905	-15.8007
MER4_11q21e	0	0	0	0	0	0	0	0	2.28174	0	0	-3.01489	0	6.88455	0	0	-9.87745	1.15569	0.386789	2.85629	0	0	-5.88296	0	0	0	-12.0783	-6.41971	0	0	0	0	-5.35924	0	0	1.00363	0	0	0.112234	0	0	-6.6798	-8.4886	0	0	3.50616	-13.628	-12.0064	-10.9525
MER4_12p12.2a	0	0	0	0	0	0	0	0	0	0	0	-1.0293	0	0	0	-1.83394	0	0.0211926	0	0	0	0	-1.44453	0	0	0	0	-1.54681	0	0	0	-2.66547	0	0	0	0	-1.07521	0	0	0	0	-1.62687	0	0	-2.51512	-0.304338	0	0	0
MER4_12q12a	-4.46119	16.3696	-27.8014	-51.1023	-13.0098	21.949	-29.0732	-48.2957	19.2465	-3.13786	-37.8465	-32.6842	-71.7129	19.9008	-28.6223	-44.4671	-99.4826	21.4344	-10.5716	0	-10.9588	-67.8308	-82.5979	-59.0789	-48.7457	11.8312	-84.9685	-63.8636	-30.9644	-56.1855	-30.9795	-70.563	-55.2187	-2.69682	-68.8386	-7.40821	-37.8992	-73.2332	11.4539	12.8439	0	-63.5544	-72.176	-39.3703	0	17.2818	-111.808	-83.848	-74.4023
MER4_12q12b	-3.51496	13.733	0	-30.3443	0	24.2261	-19.4658	-35.6283	15.2942	-3.02975	-24.1376	-15.274	-42.8789	0	-21.7349	-28.0446	-57.2018	22.167	0	0	-9.6987	-40.0287	-47.7268	-42.2098	-38.8353	12.3869	-55.5636	-40.4562	-17.7154	-41.052	-19.2193	-45.7386	-31.9863	0	-51.5156	0	-19.1246	-53.0348	5.53606	12.5902	0	-36.8476	-36.3518	-24.4036	0	9.65962	-67.1714	-57.0095	-50.2374
MER4_12q12c	-2.45383	3.52445	0	-15.8603	0	0	0	-15.7695	0	-2.77946	0	-9.57856	-20.1233	0	0	-14.4111	-27.7279	0	0	0	0	-16.025	-25.3227	-20.1757	-13.6992	7.99473	-17.4802	-20.6001	0	-15.687	0	-21.7095	-14.6163	-1.29632	-21.7875	0	0	-24.4667	0	8.98632	0	-21.8799	-20.3606	-13.0871	0	0	-27.5618	-25.3075	-17.0197
MER4_12q12d	-3.40107	0	-17.0572	-32.8658	0	12.3952	-19.5793	-32.5743	0	-3.21192	-27.2128	-13.4476	-41.7423	0	-17.8937	-25.4351	-54.2704	14.4312	0	0	-8.70743	-32.2528	-45.12	-32.9774	-30.2382	6.92559	-39.1329	-34.8684	-17.571	-31.0684	-21.3459	-38.2432	-27.5672	0	-45.0738	0	-19.3439	-43.4455	0	11.5155	0	-36.2549	-38.7636	-23.7829	0	11.4225	-52.8386	-49.4955	-36.1752
MER4_12q12e	-4.38488	15.9234	-24.135	-45.1228	0	18.8731	-23.3507	-42.7458	13.6996	-3.48454	-32.4128	-30.3436	-70.9601	0	0	-46.5798	-92.1832	23.2147	-9.14182	12.0651	-9.56111	-55.6738	-77.1726	-54.0963	-49.0932	14.5499	-81.477	-63.7635	-32.6577	-55.5402	-27.6171	-67.638	-48.0441	0	-65.3347	-5.92063	-26.5218	-67.9901	7.66202	15.6151	-19.9754	-62.7038	-60.5339	-30.4516	0	25.9002	-105.294	-75.6519	-68.6817
MER4_13q12.12c	0	0	0	0	0	5.72709	0	0	0	0	0	0	0	0	0	0	0	0	0	0	0	0	0	0	0	0	0	0	0	0	0	0	0	0	0	0	0	0	0	0	0	0	0	0	0	0	0	0	0
MER4_13q32.3a	-1.35731	0	0	0	-1.11045	0	0	0	0	-0.222155	0	0	-3.80243	0	0	-3.78191	0	1.48047	0	0	0	0	0	0	-2.86565	0.646259	0	-3.00246	0	0	0	-3.54081	0	-1.02566	0	-0.617179	0	0	0	0	0	0	0	0	0	0	-4.62147	0	0
MER4_13q32.3b	-2.25379	11.8685	0	-26.1777	0	9.02202	-25.8031	-21.1652	13.7702	-2.57944	0	-9.83797	-28.8825	14.419	-14.6491	-13.3795	-42.8477	12.1035	-7.62452	8.42627	0	-36.2566	-33.3241	-31.0844	-24.9515	0	-42.4495	-25.1624	-7.84671	-27.608	-12.5351	-23.9664	-30.4356	0	-33.0539	-4.47459	-16.506	-40.3033	4.63435	0	-9.75664	-30.2481	-28.7114	-21.0937	22.4633	13.2337	-44.8748	-37.7068	-37.9311
MER4_14q12b	-4.95479	8.29864	0	-20.1621	0	0	0	0	0	-3.30292	0	0	0	0	0	-15.8989	0	0	-6.53794	0	21.8452	22.9445	0	0	0	9.87966	35.2979	-18.8669	-13.3667	0	0	0	0	0	0	-7.58443	0	0	0	14.075	0	0	21.1014	0	0	11.8381	0	0	38.5113
MER4_14q21.1a	0	0	-2.95273	0	0	-0.929942	0	0	0	-0.670752	0	0	0	0	0	0	0	0	-0.992961	0	0	0	0	0	0	0	0	0	0	0	0	0	0	0	0	-0.706793	0	0	0	0	0	0	0	0	0	0	0	0	0
MER4_14q32.33a	0	0	0	0	0	0	0	0	0	-3.49051	0	0	0	0	0	0	0	0	0	3.6964	17.2323	28.5091	0	0	0	0	34.7757	0	0	0	0	0	13.5966	0	0	0	0	0	0	0	0	0	27.799	0	0	0	0	0	33.4197
MER4_15q22.31a	0	0	-13.1966	-26.3807	0	8.87136	-32.3465	-32.8108	5.75252	0	-23.8021	-11.6011	-37.0848	0	-23.785	-14.7819	-63.5287	7.28286	-7.15505	2.52358	-15.05	-46.4357	-35.4277	-37.3798	-33.2698	0	-72.4176	-29.718	-11.7785	-35.7389	-19.8817	-29.7382	-38.4067	-2.04873	-53.1227	-4.09376	-21.6558	-38.1241	0	0	-18.9893	-34.5985	-42.778	-27.767	14.1437	11.3839	-65.2231	-52.9421	-60.749
MER4_15q22.31b	-3.37864	0	-23.4237	-43.7185	0	5.48703	-43.6632	-55.2607	9.78866	-1.94098	-45.5576	-16.7012	-67.7759	13.3782	-35.5321	-39.3413	-104.471	7.9181	-9.3072	7.20204	-19.8901	-64.2815	-60.8005	-54.9825	-56.3018	0	-98.4994	-46.541	-24.7362	-53.9703	-32.9237	-53.196	-52.6868	-4.28659	-76.974	-4.13371	-30.5751	-63.5111	4.7833	0	-28.5334	-47.5315	-59.8707	-41.2532	19.1125	17.5295	-100.586	-77.2793	-86.9395
MER4_17q11.2a	0	0	0	0	0	0	0	0	0	0	0	0	0	-2.44695	0	0	0	0	0	0	0	0	0	0	0	0	0	0	0	0	0	0	0	0	0	0	0	0	0	0	0	0	0	0	0	0	0	0	0
MER4_19p12a	0	0	0	0	2.16418	0	0	0	0	0	0	0	-6.36231	0	0	0	-8.98586	0	0	0	0	0	0	0	0	0	-7.71463	-3.64381	0	0	0	0	0	0	0	0	0	0	0	0	0	0	0	0	0	0	-10.6974	-8.40773	0
MER4_1p12a	0	10.5328	0	0	0	8.41921	0	0	0	0	0	-12.9696	-20.0088	0	0	-11.7572	0	0	-7.66786	-4.26884	-6.98688	0	-27.5228	0	0	7.64335	0	-24.8154	0	-23.0507	0	-26.1084	-13.3747	-2.95664	0	0	0	-15.3759	0	17.1724	0	-22.2212	0	0	0	0	-30.5257	-20.2929	0
MER4_1p12b	-1.50763	5.1231	0	-10.3719	0	0	0	-11.9492	3.80149	0	-9.58017	-5.72916	-17.1502	0	-7.31705	-11.3096	-21.6473	8.70108	-5.12787	0	0	-16.1635	-17.8666	-13.0421	-13.0237	0	-17.9588	-15.0163	0	-13.127	-6.18308	-14.8166	-11.5462	-2.73348	-19.3368	0	-7.7353	-17.3824	0	0	0	-15.2616	-14.7073	-8.08417	0	3.25205	-21.2536	-20.4359	-17.5753
MER4_1p21.3	0	0	0	-19.9465	0	0	-15.8861	-20.1074	0	0	0	-17.4314	-37.878	0	0	-24.2729	-54.5231	7.21583	-12.372	8.43907	-8.80029	-33.5396	-38.3474	-26.3151	-25.4616	8.70478	-53.5229	-31.1693	-12.932	-23.8788	-13.0478	-33.5489	-27.7357	-1.93312	-39.2815	-8.83609	-20.7544	-31.7027	7.7817	0	-18.2785	-37.5914	-41.3662	0	0	15.3053	-57.9732	-44.8976	-47.424
MER4_1q21.2	-1.95076	0	-5.96685	-9.30486	-3.49297	0	0	-8.10102	0	0	-7.81069	-4.78946	-13.6903	0	-8.93139	-7.31272	-13.8458	0	0	0	0	-10.308	-9.73546	-9.23583	-12.8315	0	-13.2227	-8.35119	-5.65208	-13.7482	-6.42319	-10.9968	-7.08774	-2.19975	-13.1776	0	0	-11.5003	0	0	0	-9.44417	0	-5.55088	0	0	-17.9284	-14.3342	-13.8335
MER4_1q25.1a	0	0	0	0	0	0	0	0	0	0	0	1.39312	0	0	0	0	0	0	0	0	0	0	0	0	0	0	0	0	1.12187	0	0	5.47661	0	0	0	0	0	0	0	0	0	0	0	0	0	0	0	0	0
MER4_1q42.13	-1.24132	1.84813	0	0	-2.13346	0	0	-3.00557	0	0	-3.94468	2.31186	-3.64231	0	-3.84417	-2.55574	-3.3607	0	0	0	0	0	0	-4.89128	-3.24327	0.887098	0	0	0	0	-2.77136	0	0	-1.2818	-7.41529	0	0	-2.87448	0	0	0	0	0	-2.66281	0	0	-4.16072	-4.26903	0
MER4_1q44a	0	0	0	0	0	0	0	0	0	0	0	0	0	0	0	1.51623	0	0	0	0	0	0	0	0	1.28456	0	0	1.12266	0	0	0	0	0	0	0	0	0	1.40677	0	0	0	0	0	0	0	0	1.47398	0	0
MER4_20p11.21a	-1.42634	0	0	0	0	0	0	0	0	0	0	0	-6.52361	0	0	-5.6691	0	3.98692	0	2.67738	2.21296	0	0	0	0	2.25215	0	-5.03237	-4.82548	-7.04722	0	-8.77104	0	-0.995371	0	0	0	0	0	5.65297	0	0	0	0	0	3.42291	-6.65132	0	0
MER4_20q13.13	0	0	0	-23.3073	-6.23518	0	-18.8767	-25.776	0	0	-18.3193	-17.1606	-33.0236	0	-19.2261	-21.9595	-50.2848	0	0	4.87529	0	-21.6048	-35.2918	-29.6067	-18.8417	0	-38.937	-31.9588	-16.5351	-30.3831	0	-30.1041	-26.4263	0	-35.7443	0	-22.7832	-31.3701	3.17398	0	-13.5938	-30.1293	-25.1712	-21.3584	17.4577	9.23013	-53.1808	-45.0658	0
MER4_21q22.3a	0	2.08527	0	-10.341	0	0	0	-8.27791	11.1489	0	-7.65625	0	-9.79177	10.3803	0	-6.89767	-15.1564	0	0	0.882207	0	-8.18726	-9.60712	-7.98661	0	0	-10.642	-8.84372	0	-8.88553	-5.59514	-9.1152	-6.71644	0	-10.7412	0	0	-8.86999	0	0	0	0	-6.94524	-6.36619	0	0	-13.1201	-11.8862	-10.1203
MER4_2p21	-3.70242	12.6078	-21.611	-52.1616	-8.57333	11.977	-28.117	-45.3825	21.6724	-2.81053	-33.5416	-26.9325	-57.8915	0	-35.636	-47.6955	-79.3311	11.6273	-8.09236	9.17337	-14.2492	-54.3137	-67.4243	-45.318	-43.8628	0	-68.0791	-56.2015	-33.0067	-57.4773	-29.1429	-54.3457	-42.9697	0	-65.5051	0	-27.2776	-59.4097	3.47925	0	-26.255	-52.6129	-49.7867	-30.5289	33.4262	15.3972	-86.485	-66.5974	-60.9587
MER4_2q14.1a	-0.969916	0	0	-10.397	-3.83219	0	0	0	0	-1.09027	0	-8.35472	-14.2904	0	0	-9.56456	-12.8731	0	-7.02131	0	2.77845	0	-15.5074	-11.5685	-10.0044	4.7276	0	-14.1051	-7.74382	-14.8432	0	-20.4684	0	0	-15.7001	-3.29951	0	-12.0631	0	0	0	-12.314	0	0	9.52695	8.18997	-18.8242	-12.6026	0
MER4_2q14.1b	-1.39695	0	-12.8084	-24.244	-8.55829	0	-17.7625	-29.9589	0	0	-21.3338	-10.9402	-40.4088	0	0	-28.9793	-56.2801	0	-16.4809	0	0	-33.5267	-41.5758	-30.1104	-28.5274	0	-39.2322	-29.3427	-12.5277	-25.7458	-18.9487	-36.0289	-28.7007	-1.7627	-48.4746	-9.9908	-20.705	-35.8638	6.03415	0	-16.6743	-34.4628	-35.4766	-21.6814	0	13.0289	-51.2711	-50.2211	-31.7728
MER4_2q37.3a	0	0	0	0	-4.00295	0	0	-11.846	7.14436	0	-11.3776	0	-22.3315	0	0	-11.2495	-26.2418	7.44235	-6.59833	0	0	-15.4479	-15.135	-28.0299	-13.1882	5.015	-25.4305	-12.5642	0	-11.2491	0	-19.7789	-12.6508	0	-15.5947	-8.4572	0	-30.8917	0	0	0	-26.2218	0	0	0	0	-22.6709	-17.8736	-17.3828
MER4_2q37.3b	0	0	0	0	0	0	0	0	0	0	0	0	0	0	0	0	0	0	0	0	0	0	0	0	0	0	0	0	5.5271	0	0	0	0	0	0	-2.5239	0	0	0	0	0	0	0	0	0	0	0	0	0
MER4_3p21.31a	-3.23917	0	-16.6789	-30.9835	0	0	-29.4768	-32.9314	9.71645	0	-26.8095	-13.0743	-43.0514	14.6884	-21.8509	-28.5311	-60.3907	8.40223	-7.7928	10.261	0	-36.1972	-38.6588	-30.0903	-36.5377	0	-52.1792	-33.2031	-17.15	-32.7607	-26.9448	-37.5035	-30.3535	-2.45984	-53.2487	0	-19.396	-39.1188	4.48237	0	-17.1867	-30.1257	-36.2602	-20.5003	17.8772	18.6175	-57.3866	-54.5468	-40.612
MER4_3p21.31b	0	0	0	-18.2989	0	0	-15.3837	-9.46154	0	0	-9.56478	-4.44231	-14.9049	0	-8.80042	-10.859	-21.2146	0	0	2.51301	-8.84151	-9.99091	-12.663	0	-11.519	0	-21.116	-11.8063	-8.45114	-11.1863	-9.64122	-12.4431	-9.6807	0	-17.7473	0	0	-11.4632	0	-4.37584	0	-6.93568	-17.1758	-6.14789	0	9.19296	-20.3016	-16.0559	-18.036
MER4_3p25.1a	-0.791346	0	0	-7.95758	0	0	0	0	0	-0.545072	0	0	-15.0642	0	0	-8.69024	0	3.40864	0	2.59101	0	0	-14.6081	0	0	0	0	-12.5126	0	-8.91562	-4.86271	-8.50195	0	0	-11.0902	0	0	0	0	0	0	-10.1975	0	0	0	4.2393	-15.188	0	0
MER4_3q13.2b	0	0	0	-5.43143	0	0	-6.63686	0	0	0	0	0	0	0	0	0	-2.94577	0	0	0	-1.98366	-1.89473	-1.25124	0	0	0	-4.32208	0	0	0	0	0	0	0	0	0	0	0	0	0	-3.22132	0	0	0	0	0	0	0	-4.32939
MER4_3q29c	0	0	-9.70179	-10.422	-5.65836	0	0	-14.9105	3.42173	0	-15.6824	0	-18.3476	0	-13.4327	-11.3291	-31.2478	5.63614	0	0	-9.75544	-16.7776	-13.6831	-11.55	-18.8294	0	-32.8574	-12.8408	-7.47805	-17.238	-11.7614	-15.0808	-14.1316	-2.08123	-26.5486	0	0	-13.9924	0	0	0	-10.4599	-15.8981	-8.5992	9.06881	3.24703	-30.9483	-23.3879	-29.9651
MER4_4p12a	-2.3748	0	0	0	-2.17714	0	0	0	0	-0.32822	0	-1.74371	0	0	0	0	0	0	0.912172	0	-3.90519	0	0	-6.53547	-7.76339	0	-13.7739	0	0	0	0	-6.87433	0	-2.15618	0	0	0	0	0	0	-5.30771	0	-9.23308	0	0	0	-9.25812	-7.9241	-12.3954
MER4_4p12b	0	0	0	0	0	0	0	0	4.35686	0	0	0	0	0	0	0	0	0	0.261964	0	0	0	0	0	0	0	-8.36587	0	0	0	0	0	0	0	0	0	0	-5.55541	0	2.31614	0	0	0	0	0	0	0	0	-7.59197
MER4_4p12c	0	0	0	0	0	0	0	0	0	0	0	0	0	0	0	-3.71311	0	0	0	0	0	0	0	0	0	0	0	-2.23082	-2.23157	0	0	-2.22318	0	0	0	-1.79298	0	0	0	0	0	0	0	0	0	0	0	0	0
MER4_4p16.3b	-2.06984	0	0	0	-1.94149	0	0	0	0	-0.301488	0	0	0	-0.984312	0	1.44625	0	0	0	0	0	0	0	-3.39268	0	0	0	0	0	0	0	0	0	-1.92493	0	-0.0219898	0	0	0	0	0	0	0	0	0	0	0	0	0
MER4_4q25b	0	0	0	0	0	0	0	0	0	0	0	0	0	10.1313	0	0	0	11.9964	0	0	5.23875	0	0	0	0	8.61781	0	0	0	0	0	-12.2677	0	0	0	0	0	0	0	13.3558	0	0	0	0	0	0	0	0	0
MER4_4q26a	0	0	0	0	0	0	0	0	0	0	0	0	0	0	0	0	0	0	0	0	0.0601744	0	0	0	0	0	0	0	0	0	0	0	0	0	0	0	0	0	0	0	0	0	0	0	0	0	0	0	0
MER4_5p12a	-1.40648	0	0	0	0	0	0	0	0	0	0	1.72275	0	-1.40794	0	0	0	0	0	0	0	4.88714	0	0	0	0	0	0	0	0	0	0	0	-1.21499	0	0.158819	0	0	0	0	0	0	0	0	0	0	0	0	0
MER4_5p12b	0	0	0	-11.2648	0	0	0	-10.1119	10.9978	-1.28226	-13.7281	-6.17841	-21.886	13.7905	-10.7346	0	0	8.85155	0	0	5.9666	0	-14.0107	-12.3659	0	0	0	-15.6725	-8.79379	-18.9726	0	-17.9837	0	0	-20.7032	0	0	-14.1184	3.57643	0	0	-20.4411	0	0	0	0	-22.9508	-23.6859	0
MER4_5p13.2a	-2.82293	6.24155	-8.17715	-16.8938	-5.44107	5.83943	-10.1089	-10.9943	12.1123	-2.13791	0	0	-13.4658	0	-10.6329	-12.853	0	1.78624	0	4.61399	0	0	-11.6041	-13.2801	-14.9317	2.29782	0	-13.1023	-11.8644	-13.3041	-10.5511	-16.0453	0	-5.50243	0	0	0	-18.407	2.42035	0	0	0	0	0	0	9.14289	0	0	0
MER4_5p13.2b	0	0	0	-14.4127	0	0	0	0	0	0	0	-15.0738	0	0	0	0	0	0	0	0	0	0	-21.5986	0	0	0	0	-23.3045	-12.8067	-16.2519	0	-17.408	0	0	0	0	0	0	7.23826	0	0	0	0	0	0	0	0	0	0
MER4_5p14.3b	-2.04178	14.172	0	-27.4145	-10.6384	0	-14.6526	-26.7312	13.1067	-2.12164	-30.4924	-18.2609	-42.7467	16.9075	0	-30.4689	-59.9732	15.6396	-9.2861	0	0	-33.5442	-51.3693	-35.2176	-20.0075	7.32088	-33.0276	-42.3721	-14.1941	-33.8115	-14.6339	-42.7293	-28.9597	0	-31.8281	-3.81633	-20.4675	-44.1753	6.42144	0	-12.5305	-46.7794	-31.7846	-27.9558	12.3227	13.9239	-53.8412	-37.4852	-31.9034
MER4_6p12.1	0	10.0148	0	0	0	8.19546	0	0	15.6537	0	0	0	0	22.4977	0	0	-13.877	6.40214	0	0	4.35115	-10.8963	-11.5898	-16.2546	0	7.07521	0	-10.7162	0	0	0	-10.8587	-8.33397	0	0	0	0	-11.9605	4.96322	5.9708	0	-11.5283	0	-10.0285	0	8.08238	0	0	0
MER4_6p22.3d	-3.33141	0	0	-34.3857	0	12.6296	0	-29.3351	17.6191	-2.5013	0	-25.4916	-47.4532	19.438	0	-34.0328	-63.2876	14.5095	-9.57435	9.50057	0	-37.0008	-53.958	-31.2186	-32.3074	9.5469	-45.1689	-45.2891	-24.3576	-34.7137	-16.6623	-44.6105	-28.8603	-2.44631	-37.6102	-5.08994	-19.2445	-40.8394	7.53217	14.8167	-22.2736	-41.2656	-36.3483	0	0	25.272	-65.0998	-48.1245	-40.0327
MER4_6q14.2	-2.54536	13.9839	0	-32.7443	0	11.7674	0	-24.4063	18.0175	0	0	-21.3967	-38.8178	19.8629	0	-27.6421	-59.4318	8.60137	-7.13205	7.08286	-8.29377	-35.3154	-44.992	-28.0672	-27.4539	5.36997	-48.8836	-41.937	-20.4202	-34.0578	-14.0767	-37.7819	-29.6834	0	-40.6825	-4.30586	-20.3861	-35.1502	3.72384	5.60871	-14.4804	-37.1885	-35.1335	-18.8633	21.3832	17.5744	-64.5512	-43.4388	-44.9024
MER4_6q22.1b	-4.84013	27.3459	-27.5864	-48.2834	-10.7336	24.5167	-36.5415	-55.6877	36.2167	-5.83275	-48.1689	-24.3323	-73.0228	36.6683	-31.1712	-43.1668	-110.691	24.0281	-11.0808	13.5322	-12.9366	-68.955	-76.7038	-62.4889	-60.1738	12.3905	-96.3737	-65.1689	-27.1424	-62.4928	-32.0422	-69.2179	-64.4599	0	-86.7709	-7.20845	-39.6097	-75.5779	11.2897	14.9835	-28.634	-69.3354	-70.9809	-44.7853	31.3592	28.1662	-111.937	-99.3393	-86.7056
MER4_6q26b	0	0	0	0	0	0	0	0	0	0	0	0	0	0	0	0	0	1.16587	0	0	0	0	0	0	0	0	0	0	0	0	0	0	0	0	0	0.0539803	0	0	0	0	0	0	0	0	0	0	0	0	0
MER4_7p11.2f	0	0	0	0	0	0	0	8.75679	0	0	0	0	0	0	0	0	0	0	0	0	4.44544	0	0	0	0	0	0	6.77379	0	0	0	0	0	0	0	0	0	6.23047	0	0	0	0	0	0	0	0	0	0	0
MER4_7p14.3b	-1.86132	5.55562	-12.0853	-22.7317	0	0	-27.9331	-28.7678	9.41117	0	-24.4672	-9.1025	-41.3258	13.0987	-19.9678	-15.7016	-57.6087	6.71651	0	3.31451	-9.77954	-29.8638	-26.9821	-30.4234	-31.9623	0	-56.1364	-27.2055	-14.5915	-33.5281	-16.5656	-29.6844	-29.6196	0	-57.7303	0	-17.7052	-30.9657	3.07429	0	0	-24.566	-32.9366	-18.5307	0	8.61048	-62.8979	-46.1908	-53.7573
MER4_7p21.1	0	0	0	0	0	0	0	-7.46081	0	-0.46638	0	0	-10.9836	0	0	-4.66515	-13.0551	0	0	0	-2.95827	0	0	0	-10.6826	0	-8.19228	-5.37312	-3.66648	-8.5048	0	-6.47156	0	0	-9.97867	0	0	-6.23299	0	0	0	-8.11893	0	0	0	0	-11.278	-10.3147	-10.7181
MER4_7q21.12	-1.06515	0	0	-5.12653	-1.70958	0	-5.00171	-5.55827	0	0	-5.49605	0	-9.07288	0	-4.14981	-3.77069	-9.59383	0	0	0	-2.74646	-4.78504	-4.2086	-5.95766	-6.41927	0	-9.11965	-3.51584	0	-5.4035	-3.87733	-6.06882	-3.96029	-1.10391	-10.279	0	0	-5.0865	0	0	0	0	-4.19846	-3.14977	0	0	-10.035	-10.0842	-9.76866
MER4_7q21.2	0	12.8035	0	-20.4378	-7.60558	15.7425	0	-21.9379	24.4249	0	0	-19.3339	-35.4179	20.6969	-15.7961	-16.5163	-38.7627	8.92281	-4.78931	5.60108	0	0	-34.809	-36.1903	-17.4668	0	-27.3712	-35.3357	-12.9363	-27.7685	0	-32.0215	-23.3088	0	-28.0332	0	0	-45.6554	0	0	0	-40.0856	0	-16.6944	20.6842	11.8844	-48.3613	-39.8521	0
MER4_7q31.1a	0	0	7.48508	0	0	0	0	0	0	0	0	0	0	0	13.4669	0	0	6.05693	-3.32187	0	0	0	0	0	0	6.50159	0	0	0	0	8.05539	0	0	0	0	0	0	0	0	14.9629	0	0	0	0	0	0	0	0	0
MER4_7q33a	-2.1633	0	0	0	-7.66103	0	0	0	0	-1.94022	0	0	0	0	0	0	0	0	0	0	7.18863	11.4852	0	0	0	0	15.4646	0	0	0	0	0	0	-2.28687	0	0	0	0	0	0	0	0	0	0	0	0	0	0	12.3658
MER4_8q12.1a	-0.133496	0	0	0	-3.5065	0	0	0	0	0	0	0	0	0	0	0	0	0	-0.585434	0	0	0	0	0	0	3.19383	0	4.43251	0	0	0	0	0	-0.355569	0	0	0	0	0	6.86859	0	0	0	0	0	0	0	0	0
MER4_8q12.1b	0	0	0	-2.63322	0	0	0	0	0	0	0	0	0	0	0	0	0	0.0937371	0	0	0	0	0	0	0	0.40761	0	0	0	0	0	0	0	0	0	0	0	0	0	1.46675	0	0	0	0	0	0	0	0	0
MER4_8q24.3b	-6.17166	24.9989	-26.9329	-62.42	-14.0121	23.2441	-40.5837	-54.5914	42.2888	-3.58653	-45.1748	-31.84	-76.1234	45.8851	-34.0079	-55.5244	-107.17	25.3047	-11.8201	14.3993	-10.4419	-66.2986	-81.5717	-53.3464	-55.5995	8.34291	-85.5898	-71.069	-36.2138	-70.2786	-33.1643	-69.012	-57.2605	-5.4248	-92.5538	-8.00063	-36.4156	-65.0388	10.4494	0	-28.6838	-69.191	-68.79	-43.128	27.451	27.3498	-109.208	-99.5291	-76.9159
MER4_8q24.3c	-4.31853	12.0675	-28.4476	-58.5929	-12.5513	16.4393	-44.5409	-62.6883	28.0868	-3.07494	-52.524	-33.4739	-82.168	38.6043	-36.0248	-53.1534	-129.067	22.1623	-10.8083	12.905	-16.0645	-73.5507	-85.2593	-64.6655	-65.5253	6.5411	-110.258	-71.7413	-34.7538	-70.9103	-38.8443	-73.826	-66.4894	-4.33972	-97.945	-6.42006	-43.2543	-73.2931	5.75583	10.1522	-34.8676	-75.6799	-80.6098	-50.9776	29.8056	25.317	-129.187	-105.716	-96.2797
MER4_8q24.3e	-2.09345	0	-7.08779	-8.44159	-3.11886	0	0	-5.43544	0	-1.127	-7.14231	0	-9.00166	0	-9.20861	-6.04854	0	0	0	0	0	0	0	0	-9.65456	0	0	-7.63858	-5.97397	-9.56615	-7.71276	-11.1797	0	-2.10083	-11.5868	0	0	0	0	0	0	0	0	0	0	0	-9.84359	-8.98313	0
MER4_9q21.12	0	0	0	0	0	0	0	0	2.15112	0.0490774	0	0	0	2.8834	0	0	-2.94239	2.39616	0	0	-2.32589	0	0	0	-1.80326	0	-4.82232	0	0	0	0	0	0	0	0	0	0	0	0	0	0	0	-2.55399	0	0.0792714	0	0	0	-4.46145
MER4_Xq13.1	-0.221596	0	0	0	0	0	0	0	0	0	0	0	0	0	0	0	0	0	0	0	0	0	0	0	0	0	0	0	1.35028	0	0	0	0	-0.227693	0	0	0	0	0	0	0	0	0	0	0.168561	0	0	0	0
MER4_Xq21.31c	-3.29351	15.942	0	-21.0283	-7.14857	0	0	-14.5331	18.0034	-2.71856	0	-12.5994	-26.5976	14.7808	0	-16.2569	-22.0241	11.7042	0	5.77096	15.467	0	-24.1828	-22.8417	0	8.43819	0	-23.1504	-17.7379	-19.7154	0	-28.1191	0	-3.17409	0	0	0	-24.8797	6.67659	9.41976	0	-14.7471	0	0	17.8486	13.183	-21.1767	-21.6036	0
MER4_Xq21.33a	-4.18291	0	0	-19.7213	0	0	0	0	0	-4.96519	0	0	-19.1114	0	0	-25.994	0	0	-5.75608	5.92042	13.8499	0	0	0	0	8.03135	0	-20.4814	-12.4269	0	0	-15.2772	0	0	0	-4.61018	0	0	3.54293	0	0	0	0	0	0	12.518	0	0	0
MER4_Xq21.33b	-3.1535	0	0	-21.6371	0	0	0	0	0	-3.6862	0	0	-23.5613	0	0	-21.894	0	0	0	5.74421	0	0	-17.8868	0	0	7.10233	0	-20.8313	-12.6333	0	0	0	0	0	0	0	0	-18.9887	0	0	0	0	0	0	13.0217	14.6234	-21.342	0	0
MER4_Xq21.33c	-2.33764	0	0	-22.0417	0	0	0	0	0	-3.61938	0	0	-21.597	0	0	-23.2094	0	0	-2.85215	0	8.0373	0	-16.4237	0	0	3.36455	0	-18.666	-12.7929	0	0	0	0	0	0	0	0	-15.6195	0	0	0	0	0	0	0	0	0	0	0
MER4_Yp11.2b	-2.13722	0	0	-9.44401	0	0	-9.4208	-4.02096	0	0	-5.85902	-2.06914	-8.23518	0	0	-5.52966	-6.99682	0	0	0	-2.95144	-3.91085	-6.15493	0	-4.53113	0	0	-5.70099	-3.95075	-8.02031	-5.27588	-7.97174	0	-1.94166	-9.82795	0	0	0	0	0	0	0	0	0	0	0	-8.32816	-7.57032	0
MER41_11p15.5b	0	0	0	0	-6.50489	2.41108	0	0	0	-2.06042	0	-9.22798	-17.026	0	0	0	-20.0457	0	0	0	0	0	-15.3982	-16.2069	-8.98009	0	0	-9.75487	0	0	0	-14.188	0	0	0	0	0	-22.5092	0	0	0	-18.4234	0	0	0	0	-18.813	0	0
MER41_12p13.2	-0.729202	0	0	0	-2.11004	0	0	0	0	0	0	0	0	0	0	0	0	0	-0.663578	0	0	0	0	0	0	0	0	0	0	0	0	0	0	-1.21241	0	-0.379093	0	0	0	0	0	0	0	0	0	0	0	0	0
MER41_12q12	0	0	-1.23178	0	0	0	-0.778073	-0.362158	0	-0.0216972	-0.36268	0	-0.666403	0	-0.404201	0	-0.381152	0	0	0	0	0	0	0	0	0	0	0	0	0	-0.345199	0	0	0	-0.350099	0	0	0	0	0	0	0	-0.461868	0	0	0	0	-0.399893	0
MER41_14q13.1	0	0	0	0	0	0	4.27525	0	0	0	0	0	0	0	0	0	0	0	0	0	0	0	0	0	0	2.99609	0	0	0	0	0	0	0	0	0	0	0	0	0	0	0	0	0	0	0	0	0	0	0
MER41_14q32.2	0	0	-21.0207	-42.6174	0	8.12544	-24.3697	-41.9678	17.2755	0	-32.4203	-25.383	-59.8537	16.926	-20.2329	-48.3027	-90.6242	7.95626	-9.56447	11.5946	-12.907	-52.0054	-60.4985	-43.5572	-49.8606	0	-81.1855	-51.9049	-25.3455	-44.5974	-27.3336	-51.0746	-47.3681	-2.9735	-60.1372	-5.39438	-29.4512	-51.5226	3.87815	8.70623	-32.8825	-47.228	-51.7063	-29.7006	30.6094	21.427	-94.2598	-67.9061	-71.1089
MER41_15q21.2a	0	0	0	0	0	0	0	0	0	0	0	0	0	0	0	0	0	0.0141461	0	0	0	0	0	0	0	0	0	0	0	0	0	0	0	0	0	0	0	0	0	0	0	0	0	0	0	0	0	0	0
MER41_15q22.31b	-2.81988	0	-27.8885	-45.5417	0	5.30456	-38.82	-53.8499	11.3291	-2.09043	-42.8635	-15.4761	-67.4516	13.49	-43.2199	-40.1396	-92.9419	7.99098	-9.81803	8.74109	-17.5312	-59.019	-59.0126	-47.7963	-54.7402	0	-87.7191	-50.3002	-26.9362	-55.1487	-36.6125	-51.0726	-48.5201	-3.26015	-81.2989	-4.67743	-34.431	-61.6869	0	0	-22.9082	-42.6515	-56.0204	-34.7696	19.1148	18.3834	-94.0396	-75.0851	-75.2835
MER41_16p12.3	-3.67653	15.5802	-18.3022	-45.3709	0	0	0	-36.6283	9.62841	-3.29964	-27.8815	-36.0936	-72.0566	0	0	-54.469	-99.333	0	-12.0672	0	-9.90824	-54.004	-85.0448	-43.0904	-43.2868	10.959	-77.0535	-72.0004	-33.8513	-54.6365	-26.5165	-61.2306	-44.2306	0	-56.3771	-8.25413	-25.5293	-57.5237	7.62047	17.3772	-28.5736	-65.8322	-60.9491	-25.8777	0	22.2189	-107.396	-71.9978	-66.4951
MER41_17q23.3a	0	0	0	0	0	0	0	0	0	0	0	0	0	0	0	0	0	0	0	0	0	0	0	0	0	0.781828	0	0	0	0	0	0	0	0	0	0	0	0	0	0	0	0	0	0	0	0	0	0	0
MER41_17q23.3b	0	6.94206	0	-13.6864	0	0	0	-14.296	12.1267	-2.58221	0	0	-17.2378	9.91046	-13.218	0	0	0	0	5.20345	13.9357	0	0	-16.8539	0	0	0	0	0	0	0	0	0	0	0	0	0	-26.8185	0	0	0	0	0	0	11.7656	6.71061	0	0	0
MER41_17q25.3	0	0	0	1.20373	0	0.004765	1.15559	0	0	0	0	0.203188	0	0.330136	1.07484	0	0	0.531265	0	0	0	0	0	0	0	0.316224	0	0	0.499082	0	0	0	0	0	0	0	1.11688	0	0	0	0.360231	1.07712	0	0	0.124763	0.0623058	0	0	0
MER41_19q13.43a	0	8.72837	-15.5669	-24.0234	-6.82722	11.6518	-17.783	-25.6777	15.2534	0	-22.6795	-7.84549	-32.0185	15.1002	-21.0288	-17.2685	-44.0727	10.5931	0	7.85762	-6.89159	-23.886	-23.3872	-23.5684	-29.3595	0	-37.1396	-22.253	-15.872	-30.8695	-17.236	-29.0588	-19.1487	-1.98943	-48.3418	0	0	-28.5594	3.24757	0	-9.26835	-14.7539	-21.7694	-14.3632	14.0232	13.2035	-46.6987	-42.1866	-32.2672
MER41_1p34.3	-1.89012	0	-21.2257	-33.1534	0	4.96836	-35.9389	-39.3003	10.2251	0	-35.3277	-10.1057	-46.1825	11.7666	-29.3	-21.1438	-70.7249	11.2531	-2.56524	5.53158	-14.7316	-42.8109	-40.0132	-36.4561	-40.7047	0	-64.4153	-33.7051	-16.6782	-37.9255	-24.2412	-36.0689	-37.1081	-1.95797	-57.9751	0	-22.226	-43.0533	3.03038	0	-16.7857	-33.5745	-41.7501	-28.1227	14.7911	10.4128	-67.0847	-58.2033	-59.6918
MER41_1q24.2	-1.50434	0	0	0	-2.81928	0	0	0	0	-0.752351	0	0	-8.32326	0	0	0	0	0	0	0	0	0	0	0	0	0	0	-6.28391	0	-8.54845	0	-10.0293	0	-1.22361	-9.85751	0	0	0	0	0	0	0	0	0	0	0	0	0	0
MER41_1q41a	-2.96037	5.18264	-15.1886	-33.6964	0	3.49417	-24.2559	-35.7847	11.777	0	-30.7567	-17.1051	-51.1048	11.1801	-23.9154	-38.6347	-75.9987	7.97458	0	12.3332	-13.2523	-51.921	-48.9858	-38.4392	-39.6047	4.00039	-71.2302	-41.3559	-17.2045	-37.8266	-24.5589	-40.2719	-41.2957	0	-58.8238	0	-20.4304	-43.8195	3.11708	7.37181	-24.2066	-36.6302	-41.8884	-28.7776	27.9717	21.5613	-75.374	-62.3621	-58.5153
MER41_1q44a	-4.88153	32.889	0	-48.2151	-11.1093	30.2302	-23.0545	-44.2578	40.8896	-3.29396	-35.665	-38.7829	-71.6906	37.6135	0	-42.2378	-89.6292	30.5491	-7.80182	13.3327	-8.54711	-55.8665	-79.7926	-54.3842	-48.4737	16.7964	-72.6195	-75.1946	-28.6197	-71.5004	-25.2225	-77.4588	-45.3107	-4.22608	-66.4067	0	-24.2714	-69.9283	8.69404	19.1115	-23.3456	-65.2099	-50.0293	-30.929	23.0421	23.1516	-105.708	-80.1011	-67.58
MER41_1q44b	-3.57716	14.9262	-18.6709	-39.5151	-10.1981	22.0305	-21.334	-37.5802	19.2621	-2.9727	-27.0004	-14.3603	-50.6808	0	0	-30.1391	-73.4118	18.5129	-9.61329	8.74959	0	-38.3858	-51.014	-39.3489	-41.9851	8.35016	-53.2081	-42.309	-20.626	-38.8192	-20.0753	-43.8301	-35.2612	-2.97102	-48.4969	-6.77971	-22.3313	-50.9343	0	15.7391	0	-41.1145	-38.8941	-24.942	13.7241	16.2633	-68.9501	-55.5241	-50.6625
MER41_22q12.3b	0	0	0	-7.63662	0	0	0	-6.89666	1.81411	0	0	-4.90577	-7.45348	2.35612	0	-8.4102	-15.5516	2.70449	0	1.10244	0	-9.52412	-13.8484	0	0	0	-13.1531	-11.0885	-4.11002	-8.56383	0	-7.70453	-11.4217	0	0	0	-8.83964	-8.75467	2.69504	0	0	-10.5875	-9.56928	-7.06114	0	3.71735	-14.8601	-12.3195	0
MER41_22q12.3c	0	0	0	0	0	5.97581	0	0	10.943	0	0	0	0	8.90007	0	0	0	5.56295	-6.78017	0	0	0	0	0	0	0	0	-11.4177	-6.17321	-13.2541	0	-12.2032	0	0	0	-4.7689	0	0	0	0	0	0	0	0	0	7.08686	0	0	0
MER41_22q12.3e	-2.2156	0	0	-9.81068	0	0	0	-13.0723	3.36004	0	-12.0655	0	-19.2657	0	-9.91677	-8.83642	-28.4027	4.64283	0	0	-4.64915	-10.9577	-10.7863	-13.0363	-19.3289	0	-29.3697	-11.0751	-7.02284	-19.0379	-6.56344	-14.255	-8.45447	-1.91048	-30.3436	0	0	-11.7125	0	5.89701	0	0	-9.3843	0	0	5.17934	-33.7566	-23.7883	-29.8134
MER41_2p11.2	0	0	-9.55085	-16.07	0	0	-14.5994	-10.6891	7.92678	0	0	0	-10.2511	6.29729	-9.79703	-7.18348	-11.0009	0	0	0	0	0	-8.85441	0	-10.0632	0	0	-8.00832	-7.36318	0	-11.3967	-9.84899	0	0	-15.2559	0	0	-9.74951	0	0	0	0	0	0	0	0	-10.0487	-11.1354	0
MER41_2q11.2	0	0	0	0	0	10.954	0	0	0	-1.97936	0	0	0	0	0	0	0	0	0	0	0	0	-15.6921	0	0	4.87289	0	0	0	-14.1442	0	-15.9598	0	0	0	0	0	0	0	11.7792	0	-15.9125	0	0	0	0	0	0	0
MER41_2q31.2	0	13.9118	-21.3338	-52.7071	-10.9526	20.2202	-31.4923	-47.9249	23.5219	-3.26695	-34.6637	-37.6442	-77.4372	22.6432	0	-51.204	-111.047	26.1637	-9.64343	0	0	-64.5216	-89.0876	-56.783	-47.2196	12.9817	-84.7593	-74.5586	-30.453	-59.3205	-29.0466	-72.5074	-51.7508	0	-70.2739	0	-42.2009	-72.2964	9.95899	15.3615	-31.3253	-72.3384	-65.8619	-35.1748	0	24.9616	-109.488	-86.1982	-66.1874
MER41_3p12.1	0	-0.192742	0	0	0	-0.407124	0	0	-2.13123	0	0	0	0	-1.77539	0	0	0	-0.609813	0	0	0	0	0	0	0	0	0	0	0	0	0	-1.74606	0	0	0	0	0	0	0	0	0	0	0	0	0	0	0	0	0
MER41_3p22.1a	0	0	-1.39308	0	0	0	0	0	0	0	0	0	0	0	0	0	0	0	0	0	0	0	0	0	0	0	0	0	-1.4885	0	0	0	0	0	0	0	0	0	0	0	0	0	0	0	0	0	0	0	0
MER41_3p22.1c	0	2.95548	0	0	-6.34038	5.97418	0	-8.49371	8.65124	0	0	0	0	6.03958	0	0	-17.2827	4.91322	0	4.20716	-7.61463	-15.7303	-9.99511	0	-7.99117	0	-21.2776	-7.14453	0	0	-6.59235	-9.06907	-11.0001	-3.51747	-12.6108	0	-7.91198	-8.95732	0	0	0	0	-14.8436	-7.06406	0	3.97024	-13.8331	-13.9011	-18.8431
MER41_3q13.31b	-1.89173	0	0	-9.48377	-8.0898	0	-9.86028	-4.92516	0	0	0	0	-6.49305	0	0	-5.19358	-8.86431	0	-0.551388	0	-2.45812	-4.2428	-5.23742	-5.4403	-6.41237	0	-7.17852	-4.50503	0	-7.24882	-4.17376	-7.31965	0	-1.90621	-9.83938	0	0	-3.93346	0	0	0	0	0	0	0	0	-9.04988	-9.30829	-7.18137
MER41_3q26.1a	0	0	0	-7.79081	0	0	0	-8.34323	0	-1.54477	0	-7.3546	-13.0284	0	0	-8.21254	-16.7586	0	0	3.56567	0	0	-10.6383	-8.11633	0	0	-12.7956	-11.1605	-7.71775	-11.273	-4.95569	-9.91202	-7.95359	0	0	0	0	-8.15637	0	0	0	-9.99568	0	0	10.657	5.37642	-20.8221	-11.9585	-13.0976
MER41_4p16.1b	-5.28219	16.0593	-26.844	-60.7445	0	19.216	-37.8812	-60.8007	31.9889	-5.04452	-47.5019	-44.6055	-92.3451	34.8593	-26.8024	-64.749	-126.992	29.0458	-11.9467	0	-10.6872	-69.54	-97.5421	-66.9046	-65.3167	14.4332	-103.306	-86.4963	-44.0037	-74.4976	-37.711	-83.2286	-63.034	-4.03331	-88.9104	-7.76629	-42.7034	-81.6653	9.39003	18.7558	-40.4574	-85.6344	-75.049	-43.5203	29.5413	29.8523	-136.786	-101.184	-86.7358
MER41_5q31.3a	0	0	0	0	0	0	0	0	0	0	0	-16.3295	-24.5916	0	0	-16.0071	-25.5386	0	-6.53041	0	0	0	-26.7039	-16.5727	0	0	0	-25.3439	-8.64716	-19.5708	0	-22.2149	0	0	0	-4.76145	0	-20.0156	2.02858	0	0	-27.6927	0	0	0	0	-28.8926	0	0
MER41_6p21.32	0	0	-8.30541	-15.5948	-6.99706	0	-11.7942	-22.8472	0	0	-14.3674	-11.4032	-20.6865	0	-17.4247	-11.5446	-25.1563	0	0	1.64408	-7.17051	-22.0872	-22.1806	-26.4956	-21.1878	0	-35.2343	-17.3897	-10.1832	-25.2194	-10.9272	-20.0568	-18.8416	0	-30.4363	0	-13.0777	-33.8392	0	0	0	-24.1829	-22.1579	-12.5701	0	0	-38.763	-32.0872	-31.6079
MER41_6p22.3	-2.52995	8.70286	0	-22.0233	-8.9272	0	0	-28.0903	8.22818	0	-16.7374	-15.7185	-37.2254	0	-18.7913	-16.7092	-31.7242	0	0	0	13.3978	0	-26.5185	-33.1572	-23.031	0	0	-24.0624	-14.3475	-26.3201	0	-26.6617	0	-2.42712	-27.3855	0	0	-42.0558	0	0	0	-31.3094	0	0	0	0	-43.3311	-35.0388	0
MER41_6p23	-1.45976	0	0	-17.9745	0	0	-21.1224	-9.71896	11.1956	0	0	0	-13.0579	9.4736	0	0	-19.3377	10.7302	0	8.19366	-5.69107	-9.62845	-7.80158	-9.43716	-16.0277	0	-20.9778	-5.23634	-5.92525	-10.4643	-10.5229	-12.6029	-8.86111	-1.32945	-19.5718	0	0	-9.29772	0	5.93902	-13.9546	0	-14.453	0	10.345	13.754	-18.4877	-15.9858	-18.8878
MER41_6q14.1a	0	3.79884	0	0	0	0	0	0	0	-2.21713	0	0	-6.29365	0	0	0	0	0	0	0	0	0	0	-8.94692	0	0	0	0	0	0	0	0	0	0	0	0	0	-10.9204	0	0	0	0	0	0	0	0	0	0	0
MER41_6q14.1b	0	5.06037	0	0	0	4.77661	0	0	0	-0.734697	0	0	0	0	0	0	0	0	0	0	0	8.01572	0	0	0	1.28174	0	0	-6.107	0	0	0	0	0	0	0	0	-6.28995	0	0	0	0	0	0	0	0	0	0	9.1799
MER41_6q14.1e	0	11.3074	0	-25.0405	-6.89883	12.8783	-21.8668	-20.4006	21.0297	-3.66224	-19.7775	-13.1553	-34.3095	26.0651	0	-15.4578	-45.7807	17.2088	0	10.0109	0	-29.4662	-28.4207	-34.4754	-25.6423	10.3236	-34.6361	-25.861	-8.68576	-29.1679	0	-34.7667	-29.7004	0	-37.5903	0	-14.8761	-29.4126	9.47398	17.4808	-13.6585	-32.4193	-23.5997	-17.4466	17.5206	18.2979	-44.0577	-38.5163	-38.9037
MER41_6q21a	-1.06351	0	-3.36945	-4.9839	-1.93221	0	-4.11644	-3.29344	0	0	-5.83416	0	-4.48186	0	0	-4.74011	-3.47297	0	0	0	0	0	-4.27442	0	0	0	0	-3.89507	-4.25209	-7.24686	-4.46176	-7.70997	0	-1.10167	-8.34922	0	0	0	0	0	0	0	0	-2.56228	0	0	-6.56016	-4.65208	0
MER41_6q23.2	-3.82836	14.9914	-21.7931	-54.6135	0	13.9181	-24.866	-47.6891	24.0774	-2.61025	-35.0722	-32.0366	-74.0635	23.5132	-23.4544	-51.0496	-107.303	24.0807	-6.73465	17.301	-13.0775	-59.4167	-85.709	-49.7297	-50.4076	10.9517	-86.1455	-71.9526	-33.4315	-56.0707	-26.727	-62.621	-49.9013	-3.02146	-65.2681	0	-32.2899	-69.141	8.95066	14.0375	-27.0655	-68.2118	-62.9072	-33.1749	38.4881	31.4555	-106.769	-77.0151	-72.478
MER41_7q11.23	-1.72162	0	0	-9.64402	-2.22567	0	0	0	0	-1.50029	0	0	-12.5309	0	0	0	-11.5399	0	0	0	0	0	0	0	-8.0043	0	-9.38571	0	0	0	0	0	0	-1.6998	0	0	0	0	0	0	0	0	0	0	0	0	-14.6286	-10.568	-10.8649
MER41_8p11.21	0	0	0	0	0	0	0	0	0	0	0	0	0	0	0	0	0	0	0	0	0	0	0	0	0	0	-1.89475	0	0	0	0	0	0	0	0	0	0	0	0	0	0	0	0	0	0	0	0	0	0
MER41_8q24.3	0	0	0	-14.6506	-8.22008	5.84585	0	0	14.6329	-2.14091	0	-16.277	-29.5626	0	0	-15.7198	-39.2968	12.8398	0	0	0	-26.282	-34.1637	-26.9275	-14.0757	7.55965	-31.9655	-31.5945	0	-24.3466	0	-31.9056	-20.4311	0	-21.9071	0	0	-31.3635	6.31265	11.7753	0	-35.8774	-23.8711	-15.9946	0	0	-46.9141	-23.2592	-32.8718
MER41_9p13.3a	-5.57611	18.0126	-21.2295	-57.7424	0	15.9093	-23.4009	-50.2333	16.3463	-4.53095	-27.638	-43.9403	-76.4313	19.5733	0	-58.0603	-104.392	10.0479	-10.0738	10.2194	0	-58.4893	-93.5733	-55.5817	-52.1554	13.2772	-77.4306	-85.5215	-42.8897	-69.1434	-28.2485	-71.3752	-50.5076	-4.87503	-74.3298	0	-34.4111	-72.0339	12.3029	15.5861	-29.8917	-78.1188	-63.2964	-37.271	30.3261	27.246	-119.228	-88.2678	-66.7566
MER41_9q21.12	0	0	0	0	0	0	0	0	6.96758	0	0	0	0	12.1811	0	0	0	0	1.42355	2.26016	0	0	0	0	0	0	0	0	0	0	0	0	0	0	0	3.48691	0	0	0	0	0	0	0	0	7.85403	1.78725	0	0	0
MER41_9q22.31	-1.06381	0	0	-8.21035	0	0	-12.3895	0	0	-1.82461	0	0	-11.077	0	0	0	0	0	0	0	0	0	0	-7.72562	-8.41129	2.56828	0	0	0	0	-6.95338	-7.48633	0	-0.984511	-11.7299	0	0	-7.43859	0	4.73768	0	0	0	0	0	3.76674	0	-9.69281	0
MER41_9q22.32	-0.192024	0	0	0	-2.80445	0	0	0	0	-0.882866	0	3.75086	0	0	0	0	0	0	0	0	0	0	0	0	0	0	0	0	0	0	0	0	0	0	0	0	0	0	0	0	5.70642	0	0	0	0	0	0	0	0
MER41_9q31.1a	-2.25398	0	-15.2424	-18.3481	-5.93941	0	-16.8806	-19.3039	4.86731	0	-20.2452	-5.63772	-23.1518	0	-16.1378	-16.0373	-36.2186	5.27045	0	2.40679	-11.1387	-18.3559	-16.1386	-15.263	-25.043	0	-35.4118	-13.9918	-12.9294	-19.5864	-17.7229	-20.1201	-14.5103	-2.42593	-30.0079	0	-11.3345	-20.8894	0	0	-8.06209	-12.3427	-22.1829	-8.66441	8.34207	8.12775	-35.5314	-28.5544	-32.8769
MER41_9q31.1c	-5.90227	33.4362	-17.8288	-52.0352	-14.2962	14.1069	0	-39.4129	33.8744	-6.24864	-28.5993	-36.7979	-69.6143	38.3323	0	-49.7176	-99.4812	22.5498	-10.8544	0	-13.6179	-58.2173	-82.4938	-48.5791	-49.3633	14.5963	-84.8742	-75.1032	-31.3303	-62.0158	-22.8517	-71.6147	-47.4227	-7.61087	-61.3687	-8.57451	-23.6162	-67.7179	15.1092	17.9594	-29.2204	-67.3304	-59.9279	-29.1683	31.1507	27.5585	-108.34	-77.0225	-72.7064
MER41_Xp22.2	0	0	0	0	0	0	0	0	0	0	0	-2.59853	0	0	0	0	0	0	0	0	0	0	0	0	0	0	0	0	-2.51527	0	0	0	0	0	0	0	0	0	0	0	0	0	0	0	0	0	0	0	0
MER41_Xq13.3b	0	6.66613	-12.8261	-28.7787	-9.82187	15.8755	-21.9861	-32.8405	12.8898	0	-26.19	-11.6368	-48.4131	12.6689	-14.6647	-21.1836	-62.6722	12.009	-9.63056	8.38495	-5.76253	-35.867	-40.7288	-35.7406	-35.0828	7.52251	-47.6105	-30.8967	-14.0412	-34.1092	-18.262	-33.8852	-31.0226	-2.20362	-46.5575	-5.71747	-18.672	-42.265	3.91325	10.2969	0	-35.1588	-34.5008	-23.4602	13.7082	15.4071	-55.0044	-45.3681	-43.2014
MER41_Xq21.33b	0	0	0	0	-9.07302	0	0	0	0	-0.905058	0	0	0	0	9.56064	0	0	0	0	0	0	0	0	0	0	4.18696	0	0	0	0	0	-7.2603	0	0	0	0	0	0	0	0	0	0	0	0	0	0	0	0	0
MER41_Xq24b	-3.35373	3.21898	0	-14.0653	-8.68493	0	-11.4197	-10.6676	0	0	0	-5.03791	-9.08672	0	-6.98991	-6.72822	-18.8914	0	0	2.0582	-2.88096	-11.7048	-12.1161	-10.7696	-12.3475	0	-15.4716	-10.9117	-6.4289	-13.7286	-7.45907	-11.1859	-9.93569	-3.40835	-18.8093	0	0	-10.5721	0	0	0	-8.39935	-10.0746	-7.19261	0	3.45529	-18.4343	-19.8655	-13.2754
MER4B_11q13.2	-2.07207	0	-12.1268	-13.4239	-5.10703	2.14404	-12.6542	-17.7777	0	0	0	-6.55293	-21.1451	0	-12.775	-9.65841	-25.8549	2.10505	0	2.8765	-2.58594	-12.4852	-17.8274	-15.0917	-19.687	0	-19.9951	-14.4126	-12.0678	-19.7074	-12.3382	-19.3607	-12.4589	-1.86015	-24.3254	0	0	-17.084	0	0	-7.93042	-9.18381	-9.93666	-8.48391	6.7561	3.1791	-29.7644	-22.4258	-18.2099
MER4B_12p13.31c	0	28.6855	-18.9275	-35.4444	-11.566	13.0657	-19.9733	-44.128	10.4298	0	-34.3307	-33.9299	-69.7495	0	-31.4449	-36.7272	-72.675	0	-8.68158	0	0	-40.2072	-67.4484	-53.7986	-38.6915	0	-71.1637	-62.3717	-27.4671	-61.9871	-19.024	-59.0081	-39.7775	0	-68.1016	-8.8124	-21.7459	-68.7884	2.8286	0	0	-67.393	-49.2232	-29.7835	14.482	9.5638	-102.159	-72.9312	-59.7847
MER4B_12q22	-3.08974	8.38335	-18.279	-42.5994	0	0	-21.8801	-38.8375	10.8204	0	-28.886	-25.0084	-60.1495	15.6136	-18.8231	-42.4971	-92.0357	8.74326	-7.067	12.7298	-9.14028	-53.5232	-68.1829	-37.8439	-39.5755	4.99489	-69.522	-57.957	-27.5966	-49.7598	-23.5592	-50.2931	-46.0496	0	-59.0277	0	-26.3461	-48.7885	0	9.13848	-19.5451	-51.0455	-50.8263	-31.4405	24.389	20.4627	-87.6969	-66.8831	-58.6526
MER4B_14q32.33d	-4.21305	0	0	-17.3638	-11.8336	0	-17.3991	-19.0846	15.2797	-2.49721	-13.8992	0	-27.1946	13.5161	0	-12.9979	-37.6174	14.5659	-3.54317	8.17145	0	-16.4403	-18.3231	-17.8314	-21.8094	6.58107	-35.5096	-15.2267	-8.72412	-15.7601	-14.6868	-24.7655	-13.2394	-3.88238	-36.63	0	0	-18.8502	0	0	0	-12.5843	-22.7122	-10.5374	13.5468	14.1456	-39.2536	-35.3581	-27.23
MER4B_17p11.2a	0	16.6767	0	-23.7642	0	8.64153	0	-16.2476	7.72211	-3.53414	0	-22.8514	-31.5917	8.79798	0	-23.2315	0	0	-5.90375	0	0	0	-34.5881	-20.6672	0	0	0	-36.861	-18.9639	-24.9379	0	-29.6354	0	-3.65824	0	-5.71818	0	-24.7502	2.54754	0	0	-30.691	0	0	0	9.08711	-29.4247	-26.2797	0
MER4B_17p11.2c	-2.08985	0	0	0	0	0	0	0	0	0	0	0	0	0	0	0	0	0	0	0	0	0	0	0	0	0	0	0	0	0	0	0	0	0	0	0	0	0	0	0	0	0	0	0	0	0	0	0	0
MER4B_1p36.33	-3.44247	12.7123	0	-18.6783	-8.46442	13.4812	0	0	20.2878	0	0	-6.71415	-24.5362	17.6538	0	-12.7004	-33.5406	9.83218	0	2.66114	0	0	-15.1357	-17.1898	-17.1227	8.3965	-21.585	-21.0347	-8.94705	-21.5375	0	-22.6732	0	-2.95293	-28.7823	0	0	-10.9907	4.22292	7.93337	0	-16.7644	0	0	0	0	-35.9805	-25.4273	-27.2023
MER4B_21q22.3	0	0	0	0	0	0	-15.6086	-12.261	0	0	-9.43479	0	-11.7017	0	-8.99735	0	-26.1573	0	-2.41198	4.43219	-6.67565	-18.1172	-15.2279	-11.8272	-10.3463	0	-28.011	-10.0782	0	0	-11.3359	-10.3033	-16.4766	0	-16.4508	0	-15.8484	-16.7248	0	-5.08837	0	-11.6576	-24.9609	-13.0329	9.42006	9.73959	-19.5957	-20.2142	-22.3193
MER4B_2p23.1	0	0	0	-15.6538	0	0	0	-16.3369	0	0	0	-9.4094	-24.0171	0	0	-18.5551	-42.7103	0	-9.18204	8.70555	-8.27881	-26.4685	-26.6012	-19.7161	-21.023	7.6028	-39.0026	-23.2167	-7.09883	-19.586	-10.6291	-23.9725	-23.0866	0	-36.5148	-2.89146	-14.9039	-22.0985	0	10.9837	-8.13682	-20.6827	-29.2533	-12.4395	0	13.1895	-39.9414	-31.8871	-35.4712
MER4B_2q31.1	-4.98781	14.3971	-25.7708	-46.4169	-7.58062	0	-36.1628	-45.3621	24.2517	-3.15248	-32.9278	-10.7208	-64.7811	25.4658	-31.8512	-42.9729	-76.8026	17.6326	-6.25212	12.7168	-11.9411	-36.336	-53.9396	-43.2302	-51.0272	8.26556	-74.9298	-43.0809	-21.5465	-42.3656	-34.4807	-49.9221	-38.9189	-3.49396	-71.6084	-6.01913	-31.728	-55.9815	6.66793	0	-24.6581	-33.3624	-43.9001	-28.1501	25.5286	24.8005	-86.1933	-69.0555	-63.5428
MER4B_3p21.2a	0	0	0	0	0	0	0	0	0	0	0	0	0	0	12.2434	0	0	0	0	0	4.53023	0	0	0	0	4.6188	0	0	0	0	0	0	0	0	0	0	0	0	0	8.67989	0	0	0	5.64419	5.49503	6.02872	0	0	0
MER4B_3q21.2	-4.72465	0	0	-14.1457	-9.96106	0	0	0	0	-3.63984	0	0	0	0	0	0	0	8.95126	-8.15204	0	8.31496	0	-16.1349	0	-15.1103	8.68753	0	-14.6035	-11.024	0	0	-21.4179	0	-5.70351	0	-8.92081	0	-20.0162	0	12.6869	0	0	0	0	0	13.0248	-18.7383	-20.7277	0
MER4B_3q25.33b	0	0	-8.48107	-18.2768	0	0	0	-16.7547	0	0	-12.8543	-6.62772	-17.059	0	-10.5449	-14.6093	-27.6921	0	0	4.81969	0	-21.2082	-22.8815	-13.5781	-15.8816	0.973388	-23.4235	-16.6789	-9.23063	-15.575	-15.054	-15.9123	-17.1894	0	-22.6704	-4.30418	-14.6643	-21.0656	4.44319	0	-10.3666	-18.6923	-22.9178	-12.5241	19.4545	8.91528	-25.3266	-24.235	-21.4342
MER4B_3q26.31	-2.46968	9.88527	0	-20.3459	0	12.4647	0	0	11.5886	-3.76281	0	-19.5838	-33.7502	11.4894	0	-23.342	-41.6617	8.31577	-7.46141	0	0	-27.1	-39.4672	-23.4039	-18.6199	11.1652	-35.458	-33.8956	-12.5773	-23.5404	0	-33.0044	-22.96	-3.57717	-25.076	0	0	-32.3548	5.45554	14.7501	0	-35.5879	-26.5865	0	0	16.3102	-45.1881	-33.999	-29.0988
MER4B_5p14.1b	0	0	0	0	0.293415	0.384219	3.41265	0	0	0	0	0	-3.50292	0	0	0	0	2.46862	0.238187	0	0	0	0	0	0	0.447303	0	0	0	0	0	-5.50992	0	0.297418	0	0	8.00561	0	0	1.01126	0	0	0	0	0	0	0	0	0
MER4B_5p15.1	0	1.68088	0	0	0	0	0	0	2.39875	0	0	0	0	0	0	0	0	0	0	0.960626	6.6997	0	0	0	0	-0.781828	5.21869	0	0	0	0	0	0	0	0	0	0	0	-0.0218905	-0.884547	0	0	0	0	0	0	0	0	5.62095
MER4B_7q21.11b	-0.328609	0	0	-6.74688	0	0	-6.24391	-6.56337	0	0	-7.90909	-3.79317	-10.4296	0	0	-5.39749	-16.6626	0	0	0	0	-8.45289	-10.7077	-8.91999	-4.89292	1.02676	-9.72104	0	0	-7.92877	0	-7.86662	-7.72316	0	-12.4169	0	-4.59197	-9.23664	0	0	0	-10.6408	-11.712	-9.34615	-2.26285	0	-14.257	-11.0211	-9.82671
MER4B_7q33a	0	0	0	0	-4.71078	0	0	0	0	-0.869628	0	0	0	0	0	0	0	0	-0.268057	1.64784	0	0	-6.00344	-4.22454	0	2.90736	0	-4.80588	0	0	0	-8.90127	0	-0.448256	-7.38738	0	0	0	0	0	0	0	0	0	0	2.75803	0	0	0
MER4B_8q21.11	-1.17866	12.5694	0	-14.3758	-5.64243	3.23137	-12.8396	-18.3385	0	-1.38516	-12.9297	-8.11914	0	0	-12.7889	0	0	0	0	0	18.9115	0	-13.3835	-24.0676	0	0	18.6979	-9.61104	0	-12.0372	0	-11.7657	0	0	0	0	-13.7195	-27.7893	2.8561	0	-12.1977	-18.2629	0	-11.9226	0	0	0	-16.3111	21.1009
MER4B_9p13.3	-5.4603	14.9172	-15.0446	-41.4254	-10.9293	0	-22.5866	-20.8467	20.8984	-3.81894	0	0	-38.9489	19.2837	0	-30.8973	-30.3023	19.9648	0	12.4041	0	0	-32.3726	-16.6281	-23.5103	9.34706	0	-31.0108	-19.7654	-21.8788	-16.1635	-28.1576	0	0	-35.1755	0	0	-25.4363	8.37472	13.637	-16.1862	0	0	0	27.3293	23.9565	-33.2987	-34.0651	0
MER4B_Xq21.33	0	0	0	-13.1591	0	0	0	0	0	0	0	-10.2801	0	0	0	-14.4686	0	0	0	0	0	0	-18.1319	0	0	0	0	-17.3533	-10.2702	-12.0318	0	-13.8291	0	0	0	0	0	0	0	0	0	0	0	0	0	0	0	0	0
MER4B_Xq26.2a	0	0	0	6.42534	-3.3998	6.96987	0	0	0	-0.978871	0	0	0	7.10815	0	0	0	4.62281	0	0	0	0	5.91221	0	0	4.01424	0	0	0	0	0	0	0	0	0	0	0	0	0	0	0	0	0	0	0	0	0	0	0
MER4B_Xq26.2b	0	0	0	0	0	6.05388	0	0	0	-1.01812	0	0	0	0	0	0	0	5.10953	0	0	0	0	6.86596	0	0	6.19533	0	0	0	0	0	0	0	0	0	0	5.36723	0	0	0	0	0	6.60502	0	0	0	0	0	0
MER61_10q21.3	-2.9032	7.1485	0	0	0	1.86001	0	0	9.02544	0	0	0	0	9.12752	0	0	-8.75841	3.42198	0.562828	7.78323	2.71051	-5.32976	0	-5.76436	-5.73333	2.56911	-9.08708	-3.04987	0	-6.24974	0	-4.52827	0	-2.92806	-8.94001	0	0	-6.62429	6.61443	0	0	-4.79084	0	0	18.9751	14.078	-10.7513	-10.0253	-11.3568
MER61_10q26.12	-6.2934	19.3011	-22.4233	-53.6566	-13.5665	14.6455	-29.2509	-39.2162	26.2758	-5.33731	-23.7495	-26.876	-67.7082	24.1279	0	-40.4962	-78.0938	24.5967	-14.2449	0	0	-35.8636	-71.2985	-45.4769	-42.1883	11.7183	-59.0064	-65.4074	-32.008	-45.1727	-23.526	-64.6214	-40.6578	-7.47885	-52.9232	-11.6763	-37.5781	-62.9207	11.8457	0	-25.8558	-60.4259	-42.376	-25.6077	32.8567	30.4995	-92.2952	-69.2624	-44.7133
MER61_13q14.2	-5.13037	15.8073	-26.8324	-62.0586	0	17.8	-43.024	-51.3436	34.3389	-2.35487	-41.4353	-33.5314	-82.679	41.2332	-26.0072	-58.1344	-122.281	28.3992	-9.48859	15.9258	-18.2454	-68.9546	-89.8521	-57.016	-62.3128	16.0487	-104.15	-79.8276	-36.8461	-67.7347	-32.5363	-72.0997	-60.7861	-3.99526	-82.1592	0	-33.9174	-68.5788	8.90354	18.3517	-37.7564	-69.1481	-74.1553	-38.7542	33.9237	33.0836	-129.188	-90.9704	-94.9018
MER61_13q22.1	-1.04541	0	0	0	0	0	0	0	0	0	0	0	0	0	0	0	0	0	0	0	0	0	0	0	0	0	0	0	0	0	0	0	0	0	-6.50284	0	0	0	0	0	0	0	0	0	0	0	0	-4.39441	0
MER61_16p12.3	0	8.40135	-19.8484	-51.1685	0	0	-22.0923	-40.0334	12.0763	-2.67652	-31.3543	-29.1438	-64.8808	0	-18.6089	-47.7496	-99.1803	15.1734	-10.8921	0	-9.18254	-49.1725	-69.6755	-41.7168	-47.0641	11.0538	-67.9578	-63.3769	-27.1129	-46.5454	-25.5894	-57.8322	-40.3309	0	-54.8452	-7.83002	-28.0466	-56.3995	7.03634	15.9276	-27.8466	-57.9168	-49.4931	-25.3731	33.7589	23.9605	-95.1342	-66.0199	-63.3519
MER61_17p13.1	0	1.54174	0	-7.04795	-3.88515	0	-11.709	0	1.09893	0	0	0	0	0	0	0	0	1.80983	0	1.45417	0	0	0	0	0	0	0	0	0	0	0	0	0	0	0	0	0	0	0	0	0	0	0	0	0	0	0	0	0
MER61_18q12.3a	-5.96921	15.3667	0	-45.2292	-12.1005	0	-23.9139	-34.6508	18.7528	-3.30074	-23.0278	-18.1123	-58.9342	21.725	0	-40.3555	-70.9054	23.2766	-15.0143	9.36063	0	-36.213	-60.5224	-35.8738	-34.3834	12.8213	-54.6081	-53.1746	-24.9089	-39.3215	-18.3459	-48.5409	-34.8499	-3.99793	-53.6066	-10.305	-28.4369	-51.7631	11.1727	13.145	-23.2891	-45.7879	-37.2517	-17.3553	26.271	25.7404	-76.0488	-58.7821	-45.7004
MER61_1p34.1a	-1.26938	0	6.30526	0	0	0	0	0	0	0	0	2.09039	0	0	0	0	0	3.56171	0	0	0	3.84588	3.93933	0	0	2.24678	0	0	4.47796	0	0	0	4.06675	-0.852702	0	0	5.67579	0	0	4.71465	0	4.52535	7.67564	0	0	0	0	0	0
MER61_1q23.1c	0	16.2654	0	-22.5156	-8.70882	13.6242	0	-31.2717	15.7761	0	-22.9734	-16.0852	-40.229	13.4882	-22.0735	-18.4894	-49.6011	7.45882	0	0	0	-24.0095	-33.7938	-42.0888	-34.2702	0	-48.0639	-32.4658	-12.3447	-31.1704	0	-30.3937	-26.845	-2.6887	-38.3976	-5.18895	-24.3058	-51.8914	0.35578	0	0	-38.1636	-26.2993	-16.8404	0	0	-66.3535	-47.7077	-47.9663
MER61_1q24.3a	-3.52444	0	-11.0552	-29.5134	0	0	-18.1656	-25.8773	7.62905	-4.35229	-17.8729	-20.148	-37.726	9.49436	0	-30.5325	-60.3129	10.9757	-10.2861	0	-8.44845	-35.7615	-43.5686	-29.7488	-30.8262	8.02009	-45.8186	-33.0646	-17.5406	-31.0056	-17.0322	-40.2009	-30.7182	-5.20167	-42.0809	-5.9429	-18.833	-34.2503	5.51569	17.2096	-19.4404	-34.4983	-33.776	-19.0573	0	16.3273	-55.0103	-45.4267	-44.4593
MER61_1q25.3	0	0	-3.44612	-6.83195	-5.77262	0	0	-5.31576	0	-2.09936	-5.14257	0	-7.18214	0	0	-6.22532	-6.14672	-0.610989	0	0	0	0	-5.44531	0	-6.20281	-2.26282	0	-4.31427	0	-6.55384	-4.20862	-7.02988	0	-4.63591	-8.85593	0	0	-3.45627	-0.124141	0	0	0	0	0	0	0	-5.88395	-8.07282	0
MER61_2q31.1b	-1.8966	0	0	-11.7143	-6.76982	0	-9.23542	-17.8103	0	0	0	-9.36186	-14.9199	0	0	0	0	0	0	0	0	0	-14.2655	-20.4105	-17.269	0	-20.8039	-11.5625	-6.5094	-14.7775	0	-12.5325	0	-1.97315	-18.0508	0	-14.9886	-23.1408	0	0	-8.86646	-15.6417	0	0	0	0	-27.8404	-24.8254	0
MER61_2q32.3a	0	0	0	0	-7.53979	0	0	-10.1035	10.0076	-1.74381	-14.6547	0	-18.2455	0	0	-11.1893	-24.768	11.2916	0	0	3.90475	0	-17.0731	-14.5102	0	7.83351	0	-13.8374	0	-10.8024	0	-19.9654	0	0	-15.3256	0	-12.4709	-17.0147	0	9.50815	0	-13.9845	0	0	0	0	-18.0731	-14.5935	0
MER61_2q35	-4.31759	12.5672	-27.5465	-57.4616	0	22.0913	-40.6262	-59.4835	19.3094	-4.51811	-42.6374	-32.7597	-78.703	21.2577	-29.3678	-55.7064	-122.068	17.4727	-9.47813	13.2282	-17.3669	-71.6261	-86.2045	-62.8094	-64.535	9.46123	-102.222	-72.8368	-32.9511	-64.6827	-37.8743	-67.5118	-58.9164	-3.59951	-82.6414	0	-38.7144	-78.5656	7.68621	12.8036	-36.3792	-72.3112	-73.7802	-44.4601	35.8726	26.996	-125.518	-94.0996	-93.8348
MER61_3p23	0	0	2.69641	0	0	0	0	5.52226	-0.0490753	0	9.23867	0	0	0	6.25285	0	17.8846	0	0	0	10.7798	16.0333	0	6.1	8.78851	0	24.4591	0	0	0	0	0	10.1561	0	13.5054	0	0	5.17241	0	0	0	0	15.2553	7.25883	0	0	15.7645	0	24.6824
MER61_4p15.2	0	2.65643	0	0	0	0	0	0	4.77798	0	0	0	0	7.53695	0	0	0	2.45071	0	-5.33831	0	0	0	0	0	0	0	0	0	0	0	0	0	0	0	0	0	0	0	0	0	0	0	0	0	0	0	0	0
MER61_4q21.23a	-0.587196	10.9925	0	-14.0435	-6.19873	0	0	-19.327	0	-0.953251	-25.3668	-8.67688	-28.6823	0	0	-17.9261	-35.3195	7.91061	-3.72984	0	0	-18.7256	-27.0769	-31.1791	-15.6705	7.26379	-19.3937	-20.0326	0	-15.2624	0	-25.237	-16.8048	0	-20.0483	-3.86111	0	-34.6672	0	0	0	-33.0075	-19.508	-15.5628	0	0	-32.8201	-23.3152	-22.7125
MER61_4q31.21b	0	8.32585	-25.8234	-46.8044	0	16.4482	-42.135	-51.1584	22.6504	-2.21091	-43.4795	-20.4969	-69.5909	28.62	-32.6404	-39.2981	-103.305	13.9757	-8.09979	10.4941	-16.2991	-55.3506	-59.0169	-50.2836	-54.2537	0	-93.4846	-49.0364	-27.0249	-52.2698	-27.9842	-52.2523	-49.7627	-2.56909	-77.7342	-4.67397	-29.2651	-57.2895	5.70342	0	-25.8151	-49.7539	-61.5733	-34.9168	22.1607	20.0149	-104.485	-77.261	-85.4538
MER61_4q31.23	0	0	0	0	0	0	0	0	12.7539	0	0	0	0	12.6269	0	0	0	12.251	-5.03756	0	5.64175	0	0	0	0	7.69923	0	0	0	0	0	0	0	0	0	0	0	0	0	11.258	0	-10.1087	0	0	0	8.4807	0	0	0
MER61_5p13.2	-3.09485	0	-17.3034	-28.0252	-10.7386	0	-20.1854	-28.471	0	-4.20821	-21.7346	-19.309	-36.867	0	-18.0883	-22.3588	-55.4209	7.28583	-8.96104	0	-13.6354	-41.8563	-43.542	-29.4167	-29.3369	0	-56.2681	-39.0132	-21.0244	-36.1774	-18.9605	-35.7925	-36.0115	-5.01641	-46.8473	-7.59328	-19.7733	-35.8485	2.64248	8.72277	0	-37.067	-43.4795	-21.8171	0	9.14901	-62.477	-52.7728	-48.7337
MER61_5q23.2b	0	0	0	-8.20685	-5.66519	0	0	0	0	0	0	0	-10.212	0	-10.4962	0	0	0	0	0	0	0	-11.504	-15.0522	0	0	0	-7.6755	0	-13.9916	0	-8.93464	-8.85781	0	-14.0133	0	0	-18.2218	0	0	0	-13.46	0	0	0	0	-17.5819	0	0
MER61_5q32	0	0	0	0	0	0	0	0	0	0	0	0	0	0	0	0	0	0	0	0	0	0	0	0	0	0	0	0	0	0	0	0	0	0	0	0	0	0	0	0	0	0	0	0	0	0.221598	0	0	0
MER61_6q14.1f	0	9.94129	0	-27.7171	0	15.8099	-28.5467	-26.7525	20.9645	-2.8393	-25.3342	-10.3971	-40.0113	21.5367	0	-12.3738	-56.4793	17.95	0	8.65882	-12.8425	-35.2832	-29.0992	-37.0191	-28.5296	7.56611	-52.9527	-22.97	-8.04467	-29.5762	-9.09415	-31.0089	-31.7446	0	-48.242	0	-15.2794	-32.8089	6.20381	13.9437	-14.7654	-33.6097	-32.8646	-23.3283	20.7046	18.2229	-55.0786	-46.4858	-54.8619
MER61_6q22.33	-0.344047	0	0	0	-6.35245	0	0	0	0	0	0	0	0	0	0	0	0	0	-1.64847	0	0	0	0	0	0	0	0	0	0	0	0	0	0	0	0	-2.17487	0	0	0	0	0	0	0	0	0	0	0	0	0
MER61_6q24.1b	0	7.41069	0	-15.6147	0	7.51571	0	-16.7789	10.7458	0	0	-11.9523	-32.1125	0	0	-16.3178	-28.0125	0	0	0	6.52942	0	-32.753	-30.497	0	0	0	-27.837	-10.2137	-27.926	0	-24.1076	-18.9383	0	-22.7563	-6.89999	0	-35.455	0	0	0	-30.0459	0	0	0	7.04159	-31.1685	-31.9434	0
MER61_7p14.3a	0	1.56731	0	0	-4.47667	0	0	0	0	-1.72508	0	0	0	0	0	-4.48469	-10.6083	1.52408	0	0	0	0	-7.18323	0	-6.15745	0	0	-4.61274	0	0	-4.17681	-7.23134	0	-4.08861	0	0	0	0	0	2.82119	0	-6.27846	-7.91736	0	0	0	-8.84396	-9.21813	0
MER61_7q21.11	0	0	0	0	0	0	0	3.7665	0	0	6.11462	0	0	0	6.40677	0	0	0	0	0	0	0	0	3.20688	0	0.860518	0	0	0	0	0	0	0	0	0	0	4.10189	3.16659	0	1.40712	0	0	0	5.33138	0	0	0	0	0
MER61_8q23.1a	0	0	0	0	0	0	0	0	0	-0.444132	0	0	0	0	0	0	0	0	0	0	0	0	0	0	0	0	0	0	0	0	0	0	0	0	0	0	0	0	0	0	0	0	0	0	0	0	0	0	0
MER61_Xp11.4	-1.0876	0	0	0	0	0	0	0	0	0	0	0	0	0	0	-12.9693	0	0	0	6.40359	0	0	-17.2121	0	-9.17588	0	0	0	0	0	0	-11.764	0	0	0	0	0	-10.3957	0	0	0	0	0	0	18.3596	13.6346	0	0	0
MER61_Xq21.31a	0	0	0	0	0	0	0	0	0	-1.003	0	0	0	0	0	0	0	0	0	0	0	0	0	0	0	5.73644	0	0	0	0	0	0	0	0	0	0	0	0	0	0	0	0	0	0	0	0	0	0	0
MER61_Xq25a	0	-0.253747	0	0	0	0	0	0	-2.75932	0	0	0	0	-2.92432	0	0	0	0	0	0	0	0	0	0	0	0	0	0	0	0	0	0	0	0	0	0	0	0	0	0	0	0	0	0	0	0	0	0	0
PABLA_11q12.1b	-4.79887	9.99701	-11.8348	-23.1325	-9.54427	0	-30.0272	-15.8311	14.2785	-2.2291	0	0	-23.5356	0	0	-13.205	-25.4852	0	0	13.2784	0	0	-20.9966	-16.2604	-19.9215	0	-20.0178	-14.3436	-9.77586	-19.573	-13.3267	-20.588	-14.0898	-4.58307	-36.9053	0	0	-20.4504	4.74627	0	0	-14.2567	-17.3227	-13.1139	28.771	23.7142	-30.3348	-33.5159	0
PABLA_13q34	0	0	-9.0933	-17.1033	0	0	0	-16.5507	0	0	-12.2286	-12.0261	-25.412	6.87716	-11.792	-22.6848	-42.3597	0	0	6.02883	0	-20.4865	-24.9035	-21.3806	-20.4469	0	-33.7106	-24.2834	-11.5326	-18.943	-8.56689	-22.4101	-21.6704	0	-21.7812	0	-12.9433	-22.7672	2.13593	0	-10.7232	-27.677	-19.4207	-14.6772	0	6.47822	-43.8312	-30.5326	-28.4759
PABLA_19p12a	-1.37559	0	0	0	0	0	0	-5.27313	2.40395	-0.703702	0	0	-9.63526	0	0	0	-8.44894	0	0	0	0	0	0	-5.19061	-7.76854	0	0	-3.85169	-3.76736	-5.76259	0	-6.67069	0	-1.18546	-8.61493	0	0	-5.23072	0	4.17782	-5.51262	0	0	0	0	2.06451	-11.7978	-12.1006	-6.81804
PABLA_1q25.1	0	0	0	0	0	0	0	0	0	0	0	0	0	0	0	0	0	3.13011	-5.51466	0	0	0	0	0	0	5.4375	0	0	0	0	0	0	0	0	0	0	0	0	0	0	0	0	0	0	0	0	0	0	0
PABLA_2p25.1	0	11.4514	-15.9343	-30.7459	-10.1881	0	-19.0901	-28.5005	0	-1.96192	-21.1401	-18.8994	-46.5121	0	0	-28.8738	-58.6626	16.9093	-18.9817	0	0	-35.0296	-52.1105	-29.2496	-25.5755	9.25795	-32.6344	-41.417	-21.6366	-31.4949	-16.4459	-45.5274	-31.5764	0	-37.251	-13.3051	-21.2411	-37.9554	9.88148	13.8761	-16.5867	-41.2619	-31.0934	-21.329	17.0255	17.1471	-54.629	-45.4463	-30.2237
PABLA_5q33.3	0	-2.02663	0	0	0	2.3043	0	0	0	0	0	0	0	0	0	-7.27701	-13.3243	-3.52093	-4.92692	1.48853	-4.81072	-9.69907	0	0	-7.31501	0	-20.2634	-8.31987	0	0	0	0	-7.72207	0	0	-1.63853	0	0	0	0	0	0	0	0	0	3.16269	-14.9169	0	-17.2345
PABLA_6p12.3	0	0	0	0	0	0	0	0	0	0	0	0	0	-0.238969	0	0	0	0	0	0.0581235	0	0	0	0	0	0	0	0	0	0	0	0	0	0.052455	0	0	0	0	0	0.116821	0	0	0	0	0	0	0	0	0
PABLA_6q27a	-5.17079	21.6237	-25.9441	-61.8534	-11.7536	21.4086	-35.1421	-53.1396	31.2685	-3.87651	-41.5213	-44.4048	-83.7722	33.8297	-23.1323	-56.8886	-113.956	28.7085	-11.1606	12.4653	0	-60.1484	-91.0485	-62.1929	-54.9166	12.0278	-84.5567	-82.3016	-43.3264	-66.39	-33.44	-77.6064	-53.2518	-4.23561	-75.9134	-6.6874	-33.0041	-80.2602	10.8694	17.2948	-36.044	-84.1664	-66.6072	-35.9905	34.8225	35.3987	-120.119	-92.2502	-68.2034
PABLA_6q27b	0	18.2507	-24.2663	-56.1995	0	16.17	-28.0226	-47.3441	16.1543	0	-36.2592	-32.1302	-70.396	17.9602	-21.2274	-50.9363	-105.628	17.3392	-11.4332	0	-12.0422	-57.8415	-77.7552	-52.2737	-49.2808	10.0612	-82.7039	-65.867	-32.7177	-52.0432	-30.4979	-60.7683	-49.9674	0	-68.7413	-7.37582	-34.1887	-66.1853	7.89186	10.8352	-33.0389	-64.1943	-62.1614	-34.3892	25.2184	23.7551	-106.112	-78.7072	-66.0591
PABLA_7q32.1	-2.95865	0	-18.0116	-25.0511	0	0	0	-18.9835	0	-3.26717	0	0	-36.2608	0	0	-23.2666	-25.2415	7.39114	-7.09461	9.73091	0	0	-22.4619	-16.2299	-25.6869	5.88284	0	-20.6001	-18.4586	0	-14.2061	-20.3066	0	0	-31.9959	-5.19789	0	-26.1125	0	0	0	0	0	0	0	16.6765	-32.054	-26.3937	0
PABLA_8q24.3	-1.68425	0	-6.85639	-6.78164	-2.79574	0	0	-8.29924	0	0	-8.55034	0	-10.2288	0	-9.22493	-8.05902	-8.24672	0	0	0	0	0	-6.461	0	-9.8668	0	0	-7.7658	-5.49822	-6.72302	-7.72836	-7.61901	0	-1.36458	-8.2672	0	0	-7.93351	0	0	0	0	0	0	0	0	-9.63647	-11.5178	0
PABLB_10p15.1a	-1.223	4.96343	0	0	0	3.19941	0	0	6.52388	0	0	0	0	5.15057	0	0	0	7.05178	-1.23806	-6.42993	2.41646	0	0	0	0	2.34655	0	0	0	0	0	0	0	0	0	0	0	0	0	0	0	0	0	0	0	0	0	0	0
PABLB_10p15.1b	0	10.305	0	0	0	0	0	-10.3479	11.9767	-2.9262	0	-11.6733	-15.8435	18.8785	0	0	-16.7514	4.70956	0	0	0	-11.9738	-16.6433	-16.8964	0	0	0	-17.234	0	-14.4276	0	-13.0951	0	0	0	0	0	-21.961	3.27203	0	0	-20.9719	0	0	10.7966	0	-22.0033	0	0
PABLB_12p11.21	0	0	0	0	0	0	0	0	0	0	-9.42289	-4.61094	-18.6052	0	0	-11.5527	-22.4469	0	-11.13	0	0	-9.87793	-13.5189	-9.65816	-10.5077	0	-13.417	-11.0755	0	-9.31063	0	-17.5034	0	0	-19.7799	-4.47512	-12.7159	-9.31471	0	0	0	-11.3308	-12.3696	0	0	0	-20.8753	-17.8576	-15.3032
PABLB_14q11.2a	-3.95426	14.9866	0	-34.2585	0	0	-18.7446	-30.9053	13.3386	-3.97253	-21.4135	-19.6865	-49.7446	0	0	-33.6793	-55.8744	0	-14.611	7.55892	0	-25.7768	-45.9333	-29.8434	-33.8084	11.2578	-38.8314	-42.2283	-21.7271	-32.0891	-16.1828	-40.0768	-22.9362	-2.91353	-38.1419	-10.1812	-18.3073	-43.2057	10.6711	9.62242	-21.1095	-35.8109	-29.1048	0	20.2619	22	-60.1421	-43.5002	-37.1395
PABLB_14q11.2b	-2.01993	0	-7.14738	-14.0051	0	10.8018	-13.9588	-12.0316	0	-1.7509	0	0	-12.6049	0	0	0	-15.0777	0	0	4.77782	0	0	-15.3214	-12.7145	-12.8146	6.20668	0	-13.6164	0	-12.7768	0	-12.7156	-8.05073	0	-20.9297	0	0	-17.1194	2.40704	10.465	0	-11.8841	0	0	8.4474	8.57777	-21.6056	-17.8632	0
PABLB_14q11.2c	-2.50191	0	-12.035	-23.3611	-5.04053	9.23179	-20.0848	-20.9755	0	-3.9886	-12.7479	-7.0782	-24.1461	0	0	-16.9819	-30.4133	0	0	6.18259	0	-17.2035	-25.4495	-19.4128	-21.5328	6.03972	-19.6433	-22.2	-10.5895	-18.2429	-11.9815	-20.0147	-15.9271	-4.57403	-31.6229	0	0	-24.0143	4.62198	12.1635	-11.128	-21.9535	-16.5958	-10.1984	0	11.3588	-34.216	-33.2462	-20.3679
PABLB_1q31.3a	-2.58426	13.2166	-10.8562	-23.1926	-7.87755	10.0084	-22.5556	-25.8327	16.0046	0	-18.985	-9.68619	-34.823	17.4389	0	-17.2245	-50.1382	0	-10.7249	0	-11.6184	-35.2105	-33.2115	-33.4326	-28.1012	4.82788	-50.8189	-22.2636	-8.59525	-26.9711	0	-28.5042	-29.7461	0	-36.1384	-8.03919	-14.8591	-39.0653	4.00354	9.55233	0	-34.701	-36.4506	-23.1357	12.6038	8.42835	-52.786	-40.722	-48.2774
PABLB_20p12.3	0	9.06536	0	0	0	12.4444	0	-13.0303	12.3457	0	0	0	0	0	0	0	0	4.49828	0	0	0	0	0	-23.9281	0	0	-15.8134	0	0	0	0	0	0	0	0	0	0	-30.1906	2.44574	0	0	-15.3017	0	0	9.76566	0	0	0	0
PABLB_7q11.21	-4.6767	0	0	0	-9.00609	0	0	0	0	-2.31447	0	0	-18.8401	0	0	-10.5882	-15.7776	8.84	-6.825	0	3.68962	0	0	-16.4388	0	5.85862	0	0	0	0	0	-19.1318	0	-3.7397	0	-6.54757	0	-13.4399	0	0	0	0	0	0	0	8.58682	0	0	0
PABLB_8q24.3a	-1.1294	2.21259	-3.97125	0	-1.70728	0	0	0	2.30406	0	0	0	0	0	0	-4.09182	0	3.05585	0	0	0	0	0	0	-5.01812	1.2883	0	0	0	0	-4.44946	-5.82245	0	0	0	0	0	0	0	3.67742	0	0	0	0	0	1.66857	-5.07638	0	0
PRIMA4_12p11.21a	0	7.59445	0	0	0	0	0	0	14.2465	0	0	0	0	0	0	0	0	0	-1.61136	0	4.73407	0	0	0	0	6.94285	0	0	0	0	0	0	0	0	0	0	0	0	5.17492	9.62224	0	0	0	0	0	0	0	0	0
PRIMA4_14q22.1	0	19.9337	-13.446	-34.3206	-9.57075	13.7274	-20.9908	-36.5662	24.8337	0	-25.9228	-23.2178	-49.0358	25.6788	-27.6178	-30.144	-67.1566	9.56463	-9.77808	5.94667	-10.0881	-41.8784	-56.2176	-45.7213	-33.6357	0	-65.2213	-47.5275	-21.8645	-45.6631	-17.3245	-44.0122	-41.0085	-2.98114	-47.352	-5.21998	-21.6658	-54.3196	4.2079	0	-21.7116	-49.0343	-43.9508	-30.4391	31.4968	15.5709	-80.5065	-53.7588	-53.0394
PRIMA4_1q24.3	-0.188795	2.99559	0	0	0	1.78238	0	0	2.83868	0	0	-2.48069	0	0	0	0	0	0	0	0	0	2.88865	0	0	0	0	0	0	0	0	0	0	2.21645	0	0	0	0	0	0	0	0	0	0	0	0	0	0	4.04151	0
PRIMA4_21q22.3	0	0	0	0	0	0	0	0	0	0	0	0	0	3.12665	0	-6.30358	-18.6017	0	0	1.53594	0	-8.58863	-9.17129	0	0	0	-14.8585	-8.5376	0	0	0	0	-7.66326	0	0	0	0	-6.55028	0	0	0	0	-8.26072	0	0	0	-12.2694	-9.08689	-13.4331
PRIMA4_Xp11.22	-3.01144	8.73711	-18.7269	-43.6927	-9.63232	7.98381	0	-32.9131	15.4164	-3.02403	-21.3113	-31.2233	-53.8474	14.045	0	-45.9063	-77.9886	13.2177	-9.13893	8.53593	-13.0832	-49.1784	-66.2133	-35.069	-34.0762	0	-59.3346	-56.1143	-29.3207	-48.1675	-21.2841	-48.9365	-41.5708	-4.35215	-48.7648	0	-18.9247	-48.4161	5.31282	10.1917	-16.8913	-52.7753	-48.6225	-28.4966	32.3603	21.4645	-83.6684	-55.1416	-52.1815
PRIMA41_10p15.3	-2.06949	4.35549	0	-13.2738	-3.36592	0	0	0	0	0	0	-7.80183	-19.6091	0	0	-10.392	-22.7031	4.72791	0	0	0	0	-12.1005	-10.0842	-8.83048	2.75728	-15.8158	-12.8416	-5.73035	-12.3754	0	-14.8139	0	-1.65263	-14.3363	0	0	0	0	7.16404	0	-9.97448	0	0	0	0	-26.6748	-12.707	-14.7932
PRIMA41_12p11.21	0	0	0	0	0	0	0	0	0	0	0	0	0	0	9.82585	0	0	0	0	0	0	0	0	0	0	0	0	0	0	0	0	0	0	0	0	0	0	0	0	8.93283	0	0	0	0	0	0	0	0	0
PRIMA41_13q13.1	0	0.920456	0	0	0	0	0	0	0	0	0	-4.18662	0	0	0	0	0	0	0	0	0	0	-7.03838	0	0	0	0	-6.93267	0	0	0	0	0	0	0	0	0	0	3.53123	0	0	0	0	0	0	4.6269	0	0	0
PRIMA41_14q11.2	-2.61664	8.1035	-9.81822	-20.0507	0	0	-17.059	-15.2522	0	-2.33546	0	0	-18.377	0	0	-13.3714	-28.1801	0	-5.39667	5.23631	0	0	-20.4292	-16.1826	-16.7533	9.77244	0	-14.9135	0	0	0	-15.6237	-14.9626	0	-26.6219	0	0	-25.631	5.321	15.1121	0	-18.2891	-17.9444	0	0	9.81422	-28.3348	-29.9709	0
PRIMA41_19p12c	-0.860016	0	-0.904024	-5.60074	-1.04274	0	-7.54158	-1.62936	2.30603	-0.733071	-1.67434	0	-1.7033	0	-1.51854	-1.58866	-4.2529	-0.0622996	-0.107504	-0.0738868	-2.78078	-2.8755	-2.00465	-1.55078	-2.08838	0	-5.34875	-1.86819	0	-2.14188	0	0	0	-0.948584	-2.957	-0.0850081	0	-1.34435	0	-0.590198	0	0	-3.77317	-1.37039	0	0	-4.244	-2.59235	-4.94252
PRIMA41_1p36.13a	0	0	0	0	0	0	0	0	0	0	0	0	0	-0.26794	0	0	0	0	0	0	0	0	0	0	0	0	0	0	0	0	0	0	0	0	0	0	0	0	0	0	0	0	0	0	0	0	0	0	0
PRIMA41_1q32.3	0	0	0	0	2.16236	0	0	-3.81338	0	0	0	1.47603	0	0	-4.79437	0	-7.05653	0	0	0	0	0	0	0	0	-1.85813	-6.9801	0	0	0	-4.96006	0	0	0	0	0	0	0	0	-3.89317	-4.89249	0	0	0	0	0	-5.29484	0	-5.37339
PRIMA41_20q13.33	0	0	-3.65539	-6.95002	0	0	-7.44887	-10.5981	0	0	-12.9559	-5.19834	0	0	-9.51253	0	-17.5351	0	0	0	0	-15.7916	-10.6033	-14.5332	-8.67325	0.349779	-12.9102	-6.31038	-2.98598	-11.0916	-8.4151	-9.62583	-10.2945	0	-14.1537	0	-8.05199	-14.5569	0	0	-5.93719	-13.7833	-10.1834	-12.5424	0	0	-13.5373	-15.947	-10.8485
PRIMA41_7p14.1b	0	0	2.17995	0	0.0869426	0	2.86973	4.90666	-0.0506011	0	7.33828	0	5.22516	0	3.24072	0	17.2721	0	0	0.0491972	11.3753	12.8208	0	5.24099	8.58372	0	26.4805	0	0	4.4327	0	0	9.09666	0	10.641	0	0	4.36711	-0.00274072	0	0	0	15.3489	5.86087	0.0536963	0.0167049	15.9754	7.41064	26.0684
PRIMA41_8q24.3	0	0	0	-10.5217	0	0	0	0	0	-2.85847	0	0	0	0	0	0	0	0	0	0	17.3603	0	0	0	0	0	24.3051	0	0	0	0	0	0	0	0	0	0	0	0	0	0	0	0	0	0	0	0	0	0
[truncated: 8 more columns]

## Sheet: LUSC
HERV	Apelin signaling pathway	Apoptosis	Autophagy - animal	B cell receptor signaling pathway	Biosynthesis of amino acids	C-type lectin receptor signaling pathway	cAMP signaling pathway	Cell adhesion molecules (CAMs)	cGMP-PKG signaling pathway	Chemokine signaling pathway	Cysteine and methionine metabolism	Drug metabolism - cytochrome P450	ErbB signaling pathway	Estrogen signaling pathway	Fc epsilon RI signaling pathway	Fc gamma R-mediated phagocytosis	Focal adhesion	Gap junction	Glutathione metabolism	GnRH signaling pathway	HIF-1 signaling pathway	Inflammatory mediator regulation of TRP channels	Insulin signaling pathway	JAK-STAT signaling pathway	MAPK signaling pathway	mTOR signaling pathway	Natural killer cell mediated cytotoxicity	Phospholipase D signaling pathway	PI3K-Akt signaling pathway	Prolactin signaling pathway	Rap1 signaling pathway	Ras signaling pathway	Regulation of actin cytoskeleton	Retrograde endocannabinoid signaling	Signaling pathways regulating pluripotency of stem cells	Sphingolipid signaling pathway	T cell receptor signaling pathway	Th1 and Th2 cell differentiation	Th17 cell differentiation	VEGF signaling pathway
ERV316A3_10q22.1a	-42.6438	0	0	-56.0692	0	-45.938	-81.6554	-13.0877	-57.8486	-122.806	14.2938	-14.087	-56.5692	-89.6167	-70.8875	-65.2161	-89.366	-73.847	0	-68.9398	-28.7891	-83.1564	-47.3993	-31.5681	-62.8027	-28.4697	-91.4715	-82.5472	-58.8066	-36.3965	-128.83	-76.3819	-76.2318	-43.5659	-38.3499	-72.2069	-66.6313	-34.3377	-40.6661	-67.3545
ERV316A3_10q22.3c	0	-6.39465	0	-6.56912	0	0	-10.7831	0	0	0	0	0	0	0	0	0	0	-5.96521	0	-7.1738	-5.23426	0	0	0	-16.4879	0	-7.64859	0	0	0	-13.3774	-13.4584	0	0	0	0	0	0	-5.63907	-5.89848
ERV316A3_10q26.12	0	0	0	0	0	0	0	0	-24.9984	-46.8606	0	-10.2074	0	-38.0053	0	-24.8301	0	-33.1884	0	-26.827	0	-31.2631	0	0	0	0	-30.6631	-27.9649	0	0	-46.2401	0	0	-18.3954	0	0	0	0	0	-26.2651
ERV316A3_11p15.3	-6.23861	0	-8.19685	-6.83109	-0.523703	-6.27042	-9.33502	0	0	-7.81374	-1.16603	0.5882	-6.78833	-10.6499	0	0	0	-6.4946	0	0	-5.51681	0	-5.56631	-5.90255	0	0	-11.1094	-6.67689	-8.53715	-6.62464	-11.5366	-10.4788	0	0	-7.07863	0	-8.13767	0	0	0
ERV316A3_11q12.3	0	-10.3742	-13.162	-14.3306	0	-14.7312	-19.152	0	-7.71764	-25.163	0	0	-21.7791	-16.3078	-14.6124	-14.7398	-33.9153	-9.8181	1.73856	-13.5413	-13.8329	0	-15.0653	-9.51932	-30.1561	-8.95475	-15.3806	-11.4755	-21.8935	-11.7505	-28.9864	-22.5214	-26.4733	0	-9.36468	-12.1254	-16.9872	-7.65737	-9.84907	-17.4012
ERV316A3_11q13.2	0	0	0	0	0	0	0	0	0	-5.25673	0	0	0	-5.12055	0	0	0	-4.05989	0	0	0	0	0	0	0	-5.69733	0	-3.71646	0	0	-6.56409	-6.373	0	-4.22638	-5.9066	0	0	0	0	0
ERV316A3_11q13.3	0	0	0	0	0	0	0	0	0	0	0	2.73066	0	0	0	0	0	0	0	0	0	0	0	-7.58131	0	0	0	0	0	0	0	0	0	6.38856	0	0	0	0	0	0
ERV316A3_11q22.1m	-7.6536	0	-9.8351	-5.52115	0	0	-5.78628	0	0	0	0	0	-5.01411	0	0	-5.46434	-8.6493	0	0	0	-3.62645	0	-4.36309	0	0	-4.57459	-5.17346	0	-7.78764	0	0	-6.84946	-8.17681	0	0	0	0	0	0	0
ERV316A3_11q23.1d	-15.2354	0	-17.3592	-16.8319	0	-15.5734	-22.6755	0	-14.6911	-42.1067	7.10847	-3.05759	-18.0193	-16.892	-19.4816	-14.3662	-34.682	-18.8283	0	-15.5452	0	-17.9229	-25.5123	0	-38.0108	-17.038	-17.2025	-19.9515	-20.8742	-17.3967	-36.2728	-29.2453	-30.9896	-12.5497	-19.0234	-19.4343	-21.0102	0	0	-14.7751
ERV316A3_11q23.3f	0	0	0	0	3.42726	-4.25099	-4.40861	0	-4.81053	0	0	0	0	0	0	0	0	-3.05472	0	0	0	-3.07312	0	0	0	0	0	0	0	0	0	0	0	-2.83482	0	0	0	0	0	0
ERV316A3_12p11.22a	-11.0076	-14.9155	-18.5797	-29.0751	0	-34.7908	-34.8205	-22.0142	-17.269	-37.9322	0	0	-18.2655	-27.7946	-41.3869	-23.9571	-28.1409	-15.4372	0	-21.1853	-17.8188	-27.5632	-15.9333	-14.9117	-29.0877	-20.5157	-59.0507	-33.2243	-23.9603	-21.5733	-47.8391	-31.8806	-23.1809	-15.0572	-22.1541	-37.1715	-59.2795	-33.9542	-37.8079	-26.4028
ERV316A3_12p12.3a	-21.4499	0	0	0	0	0	-26.6304	0	-27.1519	-35.9562	0	-13.3559	0	-39.6875	0	0	0	-40.1333	0	-28.5733	-16.2391	-34.6212	-18.1515	0	-29.4414	0	-30.3535	-37.3705	0	0	-47.76	-35.5835	0	-16.8628	0	0	0	0	0	0
ERV316A3_12p12.3b	0	0	0	0	-0.0035989	0	0	0	0	0	0	-0.330079	0	0	0	0	0	0	-0.303553	0	0	0	0	0	0	0	0	0	0	0	0	0	0	0	0	0	0	0	0	0
ERV316A3_12p13.33	0	0	0	0	0	-9.44235	-12.2063	0	0	-11.5499	0	0	0	0	0	0	-13.9283	0	-1.58146	0	0	-9.69332	-9.10533	0	-14.4204	0	0	0	0	0	-12.723	0	-11.5327	0	0	0	0	0	0	0
ERV316A3_12q21.1	0	0	0	0	0	0	0	0	0	0	0	0	0	-7.51449	-8.76185	0	-11.8783	-5.73963	-1.27977	-7.67058	0	-7.80993	0	0	0	0	-8.54206	-7.57377	0	0	0	0	0	0	0	-7.99056	-9.35097	0	0	0
ERV316A3_12q21.33e	0	-20.211	-28.0114	-34.4804	16.3121	-33.473	-29.3157	-14.2218	0	-48.4557	12.6573	-4.88833	-35.1102	-29.6199	-38.2492	-30.6459	-53.6679	-16.8266	19.3894	-23.3353	-19.2296	-19.3371	-36.6777	-30.1492	-46.3104	-29.5571	-49.4114	-41.8564	-50.7231	-26.3279	-60.6915	-51.6484	-44.1703	0	-33.3778	-33.8367	-55.1773	-32.2708	-37.5818	-29.6577
ERV316A3_12q21.33f	0	0	0	0	0	0	0	0	0	0	0	0	0	0	0	0	0	0	0	0	0	0	0	0	0	0	0	0	0	0	0	0	0	0	0	0	0	4.55662	0	0
ERV316A3_12q23.2a	-5.70853	0	-6.61468	0	0	0	0	-0.719247	0	0	0	0.0872035	-4.62632	0	0	0	0	0	0	0	0	0	-3.28168	0	0	0	0	0	-4.61755	0	0	0	0	0	0	0	0	0	0	0
ERV316A3_12q23.3a	0	0	0	0	0	0	0	0	0	0	0	0	0	0	0	0	0	0	0	2.56749	0	2.40095	0	0	0	0	0	0	0	0	0	0	0	2.83295	0	0	0	3.02587	0	0
ERV316A3_12q24.13	-34.3753	-20.5382	-36.114	-62.7788	28.9531	-54.706	-72.8069	-24.9576	-24.6244	-112.414	17.4754	0	-61.2085	-63.6084	-71.9332	-59.7753	-97.5798	-47.1797	6.16933	-49.8464	-28.9129	-49.7077	-60.3207	-26.599	-65.1053	-36.8204	-91.8949	-73.5236	-62.0352	-42.6684	-113.686	-79.2375	-90.3996	-24.4975	-35.2943	-66.9484	-76.7711	-41.4166	-35.7106	-64.0562
ERV316A3_13q13.3c	0	-8.69319	0	-12.1483	0	-14.2541	-22.4468	-3.64563	-12.5719	0	0	0	0	-11.4972	-11.6874	0	0	-8.47394	0	0	-8.0035	-12.5909	0	0	-17.7557	0	-18.766	0	0	0	-19.5275	0	0	0	0	-13.4483	-17.0841	-13.7116	-15.3616	0
ERV316A3_13q14.13	0	0	0	0	15.4104	0	0	5.85991	0	0	12.5153	0	0	0	0	0	0	0	6.24517	0	0	0	0	0	0	0	0	0	0	0	0	0	0	0	-12.6562	0	0	0	0	0
ERV316A3_13q31.1f	-0.756224	0	0	-0.822529	0	0	-1.91728	0	-0.93526	-0.832381	0	0	0	-0.701445	0	-0.701445	0	-0.701445	0	-0.71631	-0.697535	-0.701445	0	0	0	0	-0.701445	0	0	0	-0.701445	-0.82569	0	-0.718418	0	0	0	-0.93781	-0.882089	-0.711223
ERV316A3_13q32.1b	0	0	0	-11.8625	0	-12.4792	-18.1224	0	0	-21.5061	0	0	-13.4174	-11.9437	-11.5735	0	-19.6984	-11.3845	0	-16.025	0	-10.6449	-14.5551	0	-25.971	0	-11.2871	0	-11.229	-11.2669	-22.7394	-21.4915	-21.1619	-7.65973	0	0	-11.257	-8.12051	-8.74554	-11.3137
ERV316A3_14q12d	0	0	0	-19.9058	0	-15.44	-24.7227	-9.29421	-15.0909	0	0	-3.93819	0	0	-24.7416	-15.4506	0	0	0	0	-11.5787	0	0	-11.7346	0	-18.567	-38.6233	-24.8704	0	-11.7406	0	-17.84	0	0	-22.2532	-26.0068	-41.9667	-23.7534	-23.9993	0
ERV316A3_14q13.1b	0	1.37233	4.26639	2.05058	0	1.95614	0	0	0	3.47527	0	-0.0595025	2.98187	3.51925	2.11694	1.43378	3.3092	2.94806	0.0445475	2.9452	4.48025	2.30132	2.9149	0	4.39096	1.99704	2.13207	4.89679	4.68051	2.36432	5.61566	5.02354	3.15147	1.86114	0	3.14163	2.26343	0.615948	2.65444	2.57658
ERV316A3_14q23.1e	-5.8083	0	0	-8.45092	0	-6.81805	-8.46342	0	0	-7.83691	0	0	0	0	0	-7.57527	0	0	0	0	-5.61859	-6.60578	0	0	-12.9371	0	-6.54313	0	0	0	-11.846	-11.093	0	0	0	0	-7.6104	0	0	-8.56566
ERV316A3_15q14a	-9.6653	0	-14.8171	0	0	-10.2213	-12.9621	0	0	0	0	0	0	0	0	0	0	-6.72509	0	0	0	-9.81525	-6.80499	0	-16.1885	0	-7.17965	0	0	0	-13.9725	-13.3141	0	-6.13579	0	0	0	0	0	0
ERV316A3_15q21.2a	-69.1456	-38.2215	-57.3934	-82.7699	49.5024	-65.7325	-102.743	-16.3554	-63.7246	-163.148	40.1766	-17.1265	-82.9519	-111.497	-90.4414	-86.7128	-123.338	-89.0292	27.6046	-81.5493	-46.1037	-81.239	-76.8681	-48.8342	-95.1569	-47.7377	-114.815	-107.863	-90.4883	-60.6698	-163.309	-120.865	-111.102	-50.0104	-48.5744	-89.3537	-95.2039	-53.7434	-52.1798	-91.3428
[truncated: 1,941 more rows]
