# Supplementary material for: Transcriptome Analysis of Human Endogenous Retroviruses at Locus-Specific Resolution in Non-Small Cell Lung Cancer
Source: Cancers (Basel). 2022 Sep 13;14(18):4433. doi: 10.3390/cancers14184433 (PMC9497127; doi:10.3390/cancers14184433)
Supplement: Supplementary file 1 [file cancers-14-04433-s001.zip › File_S7.xlsx]

## Sheet: LUAD
cluster_1	cluster_2	cluster_3	cluster_4
HERVIP10FH_2q14.2	MER41_Xp22.2	PRIMA41_1q32.3	HERVL_4p15.2c
HARLEQUIN_7p14.3	HERVH_12p12.2b	PABLA_5q33.3	HERVH_Xp11.21
HERVH_17q12	HERVH_9q21.13b	ERVL_Xp11.21a	HERVL18_3p21.31a
MER101_10q11.22d	HERVH_11q21d	HML2_7p22.1	HARLEQUIN_1p33
HERVK11D_3q11.2	MER41_3p12.1	HERVH_3q23a	HERVE_4q31.22
HERVH_1q41f	MER41_3p22.1a	HERVH_8q24.21a	MER101_1q42.13a
ERV316A3_21q21.1f	HERVW_6q14.3a	HERVEA_4p15.1	HERVW_4q21.22
HML3_8q24.13	MER34B_4q21.22b	ERVLE_12p13.1b	MER41_1q24.2
ERVLE_20q13.12c	HERVL_11q22.3g	MER4_19p12a	MER4B_7q33a
ERVLB4_9q31.3	ERV316A3_18q21.1b	HERVH_21q22.3	HUERSP3_11q24.2
MER4B_8q21.11	HERV30_3q25.2	HERVL_9p21.3a	HERVW_13q21.1
ERVLB4_15q13.3a	HERVS71_19p12b	ERV316A3_5p13.3e	ERV316A3_11q12.3
HERVL_3p13b	ERVLE_9q33.2b	HERVE_11q13.4e	PABLB_7q11.21
HERVW_21q21.1	ERVLB4_12q13.13	ERVLB4_7q22.3	HERVH_1p35.2
HERVH_3q26.32c	HERVL_15q26.2b	MER41_7q11.23	HERVL18_11p14.1
ERV316A3_13q13.3c	MER41_8p11.21	HERVH_19p13.3b	MER4_4q25b
HERVH_2p12d	HML3_15q11.2	MER4_9q21.12	HERVFH21_19p12
HERVL_12q12b	ERVLE_16p11.2a	HERVH_12q22	PABLB_8q24.3a
HUERSP2_14q31.3	ERVLE_2q36.3b	HUERSP3_7q31.1	MER4_13q32.3a
ERVLE_17q24.1	ERVLE_14q32.2a	MER101_8p23.3	MER4_20p11.21a
MER101_7q22.1a	HML5_Xq13.1a	ERVLE_5p15.31b	MER101_2q13b
MER41_11p15.5b	HERVL18_7p21.3	MER4_11q12.1e	MER61_7p14.3a
ERV316A3_5p14.1b	ERVLE_14q12m	HERVH_21q21.1b	HERVH_6p22.3a
ERV316A3_5p15.2e	HERVH_1q25.2	ERVLE_16p11.2b	HERVH48_7q22.1
ERV316A3_6p22.1a	HERVH_1p31.1f	HERVH_2p16.1c	ERVLB4_Xq21.33a
MER101_3q26.31	HARLEQUIN_19p12e	HERVIP10F_2q23.3	HERVH_6q14.1e
HERVFC1_11p15.4	HERVW_11p14.2	HERVL40_19q13.42	ERV316A3_5q35.3c
ERVLB4_5q31.1	LTR19_9q34.11	ERV316A3_1p36.22b	HERVL_Xq21.33a
ERVLE_7q34a	ERVLB4_Xq21.2	HERVL40_10p12.1	MER4_Xq21.33a
HERVI_9q22.1	HARLEQUIN_19p12b	HERVIP10FH_17q21.32	HERVL40_14q13.1b
PABLB_20p12.3	HERVE_5q14.3c	MER34B_7q11.23a	HERVIP10FH_15q13.3
HUERSP1_20p12.3	HERVL18_9q21.13	HERVIP10F_1p36.33	ERVLB4_Xq21.33b
HML3_Xq21.1a	ERV316A3_3p25.2d	HERVIP10F_7p14.1	HERVH_8q23.3d
HERVL18_1p12	HERVIP10FH_14q12	HARLEQUIN_17q21.33	MER4_Xq21.33b
HML2_8p22	ERVLB4_2p25.3	HML3_8q11.23c	MER4_Xq21.33c
HERVH_6q12c	HERVH_18q12.2a	HUERSP3B_1p35.1	HERVH_14q12c
HERVFRD_4q32.3	ERVLB4_7q36.3a	HERVL_9q31.1a	ERVLB4_Xq21.33c
ERVLE_11q24.3d	HERVH_7p14.3d	HERVH_1p34.2a	HML1_2p11.2
HERVH_8q24.21b	ERVLE_1p36.11d	ERVLE_1p34.2a	HML5_Xq21.33
MER41_17q23.3b	MER4_2q37.3b	ERVLE_11q23.3e	HERVL_10p13b
HERVH_1p31.1a	HML6_8q12.1	ERVLE_4q24h	HUERSP2_21q22.3
HERVL66_1q42.12	HERVIP10F_1p35.2a	ERV316A3_3q27.3d	HERVL_4q34.1d
HERVL18_4q21.1	HERV4_15q26.1	HERVL18_21q21.3	HERVL18_2q31.1
MER41_6q14.1a	ERV316A3_10q22.1a	MER4_7p21.1	HERVH_2q31.1a
LTR57_5p12a	ERV316A3_3q27.3c	HUERSP1_8q13.3	HML3_10q11.21b
ERV316A3_18p11.32c	HERVL18_18q21.32	HERVFRD_3p21.31	HERVL18_3p21.31b
HERVH_10p15.1	HARLEQUIN_Xq23b	ERVLB4_15q23a	LTR19_12p13.31
HERVIP10FH_3p26.1a	PABLA_1q25.1	HUERSP3_8q11.1	HERVE_5q14.3a
ERV316A3_5q13.2a	HERVL40_18q22.1a	MER4_11q21e	HERVH_Xq21.33a
HERVL_4q32.1c	ERVLE_11p15.4f	ERV316A3_3q13.13b	MER4_5p13.2b
HERV9_15q21.1a	ERVLB4_1q24.3	ERVLE_22q13.31e	MER4B_Xq21.33
HERVE_3p12.3a	HERVK11_5q35.1	HERVK11_8q11.1	HUERSP2_19p12
HERVIP10FH_14q11.2	ERV316A3_6p22.1n	HERVL66_19p12b	HUERSP3B_1q24.2
HARLEQUIN_6q23.1	ERVLB4_18q22.2	HERVH_2p11.2d	MER41_3q13.31b
HERVW_12p13.1	ERVLB4_1p36.11	MER41_22q12.3b	ERVLE_17q24.3a
HARLEQUIN_7q33a	HARLEQUIN_1q32.3	ERV316A3_5q23.1b	MER101_2p16.1
HERV4_8q24.3	ERVLE_6q25.2a	HML3_19q13.31	HERVH_9p13.3a
ERV316A3_6p22.1i	HERVH48_8q12.3	HERVFH19_9q34.11	HML6_3p25.1
ERVLE_13q12.11	ERVL_13q21.1b	MER41_3p22.1c	HML6_16p11.2
HERVH_22q13.1b	HERVIP10FH_8q21.3	MER4B_21q22.3	MER4_Yp11.2b
HERVH_19p13.12	HERVL32_2p15a	ERV316A3_Xq28k	MER41_6q21a
ERVLE_6q22.31b	PRIMA41_8q24.3	ERV316A3_11p15.4g	HUERSP3B_22q12.1
HERVL_1p21.3b	ERV316A3_2q32.2c	HERVH_4q13.2	MER4_8q24.3e
HERVH_20p11.23b	ERVLE_1q32.1e	HERVEA_Yq11.221d	MER61_1q25.3
ERVLE_7p22.3	HERVP71A_10q25.1	HERVFRD_2p11.2	ERVLE_2q31.1b
MER101_12p13.31b	ERVLB4_2q14.2b	HUERSP1_1q44a	ERVL_2q24.1a
HERV9_3p24.3	ERVLB4_12p13.2a	MER34B_7q36.1	ERVLE_6q14.1m
MER4_5p12b	HERVFH21_7q11.21	HML5_1q42.12	HUERSP3B_Xq21.33
ERVLB4_6q27e	HERVL_6p12.3a	HERVL_12q13.12	HERVL_Xq21.33b
MER34B_11p15.5	HML3_3p21.31b	MER41_3q26.1a	HERVL_5q14.3d
ERV316A3_5p15.32a	MER61_8q23.1a	HERVH_19q13.32c	ERV316A3_2q32.1i
HML1_10p15.1	HERVL18_4p15.2a	HERVL40_1q44	PABLA_8q24.3
HML4_10p15.1	HERVH48_4p15.31	HML2_14q11.2	HUERSP3_10q23.33c
PABLB_10p15.1b	ERVLB4_3q22.1a	ERV316A3_3q27.1a	HERVH_5q31.1a
HERVL_3q11.2c	MER61_1p34.1a	ERVLE_7q32.3a	MER41_2p11.2
HERV3_19p13.3	MER101_7q22.1b	HERVL_3q25.1	HERVH_3q21.3d
HERVH_3q26.1a	HERVL40_3q22.2b	HML3_4q34.1b	PABLA_19p12a
HERVL_2q37.1	HERVH_1p31.1e	ERVLB4_15q21.2	HERVKC4_1q22
ERVLE_3q26.1a	HERVL74_6p25.1	ERV316A3_10q23.33	ERV316A3_14q23.1e
HERVH_3q26.1b	HML1_3q26.31b	HERVL_13q12.12	MER4_1p12a
ERVLB4_12q21.1a	HERVH_7q22.3b	HML6_19p13.2b	HERVE_2q37.1
HERVEA_12q21.1	HERVH_7q11.21	HERVFH21_14q32.31b	HERVL66_4p15.2
HML1_15q21.2	MER4_14q12b	HERVE_12p13.31a	HERVH_9q31.1
HERVL_14q22.3b	ERV316A3_1q42.12b	MER41_Xq24b	MER61_2q32.3a
HERVIP10FH_3q13.33	HERVH_1p31.3d	HERVW_19p12d	HERVH_7q31.33c
ERVLE_7p21.3b	HML2_17p13.1	MER41_6p23	ERVLB4_8p11.23b
LTR23_4p16.3b	ERV316A3_9q34.2b	HERVH_Xq22.2b	HUERSP1_15q23b
HERVL_9q22.32	ERVLE_22q13.2f	ERVLB4_3q25.31a	MER34B_10q25.3a
ERVLE_11p15.5a	HERVL66_19p12a	HERVL_2q34b	MER4B_17p11.2a
MER4_7q21.2	HUERSP1_2q31.1a	HERVK14C_15q21.1	MER4_Xq21.31c
MER61_6q24.1b	ERVLE_11q13.5a	ERVLE_2p22.1b	HERVL_1p22.1b
HERVE_1p36.12	HERVH_19q13.32b	HARLEQUIN_Xq11.1	ERVLB4_17q25.1
MER41_6p22.3	HERVL40_9q21.32	ERVLE_11q23.3d	HERVH_12q21.2a
HUERSP1_Xp22.2	HUERSP1_7p12.3a	HARLEQUIN_12p13.32	ERV316A3_5q14.3a
HML6_14q12b	HERVP71A_1q44b	HERVL_1q32.1	HML3_10q11.21a
MER4_2q37.3a	HERV9_11q21	ERVLB4_8q23.1e	HERVL_1p31.1d
HERVL18_5q21.2	MER4_7q33a	HERVH_Xq22.2a	HERVL_11q12.1c
HERVL_6q24.1g	MER4_14q32.33a	HERVIP10FH_1p33a	HML2_10p14
MER61_5q23.2b	LTR57_14q32.33a	HERVL_6q11.1b	HERV9_5q31.2
HERVEA_6q22.31	HERVIP10F_3p26.1	HERVIP10F_19q13.41a	HML3_3q13.33
ERV316A3_2q22.3c	ERVLE_4p16.1c	HERVH_4q13.3	HERVE_10p13b
HERVFH21_Xq11.2a	MER61_3p23	ERV316A3_20q13.33b	ERVLB4_2q11.2
HERVFH21_Xq11.2b	PRIMA41_7p14.1b	MER4_1q21.2	HERVK11_2q34a
ERVLE_2p14b	HERVH_5q23.2b	HERVL_7q32.1	HERVH_5q23.2f
MER61_2q31.1b	HERVH_19q13.32a	ERV316A3_9p21.1b	HERVS71_19q13.12a
HERV4_12p11.21	HML3_7p12.3a	HERVL18_4q21.23	HERVH_8p11.23
HERV9_Xq23b	HERVH_11q14.3	MER61_4q21.23a	HERVH_4q32.2c
HERVW_6p23	ERV316A3_4q22.1a	HML3_13q12.11a	HERVH_14q11.2a
MER101_12q13.3	HERVL_6q27g	HML6_6p22.2	HERVH_3q13.31b
HERVH_12p12.2a	HERV3_11q14.1	HERVH_3p21.31e	ERVLB4_15q25.3a
ERV316A3_6p25.1c	HERVH_7p15.3b	ERVLB4_17q21.32	HERVS71_1p35.1
HERV4_5q22.2	HUERSP3_5q21.2	MER4_5p14.3b	PRIMA41_14q11.2
HERV9_12q24.32	MER41_6q14.1b	HERV4_4q12	PABLB_14q11.2b
ERVLB4_22q11.1b	ERVLE_18q21.1b	HERVL18_11q14.2b	HERVH_11q23.3c
ERVLE_1q23.1a	HUERSP3B_2q35	LTR25_11q24.3b	HML2_11q23.3
HERVL18_2q23.1	LTR25_Yq11.223d	HERV3_3q13.2	MER4B_9p13.3
HERV3_7q34a	HERVH_2q31.1c	HERVEA_15q21.3	HERVH_6q25.2a
MER4_1q42.13	ERVLE_6p22.1b	PABLB_14q11.2c	HERVH_11q23.3b
ERV316A3_7p15.3a	HARLEQUIN_2q34	ERVLB4_10q22.3a	MER101_7q36.1a
HERVI_7q33c	HERVH_2q33.3a	HML1_1q23.3	ERVLE_2q37.3e
HARLEQUIN_5q33.3	HERVH_1q41e	HERVFRD_7q21.3	HERVIP10FH_5q23.1a
ERVLB4_8p12a	MER61_5q32	HERVH_13q33.3	HERVIP10F_1p35.2b
HERVL18_6q14.1	ERVLB4_8p23.1k	HERVH_1q31.3	HML6_12p11.21
HERVI_7q33a	ERV316A3_6p25.3a	HML5_4q24	LTR25_3q26.33a
MER61_4p15.2	HERV3_21q22.13	HERVW_2q12.2	HERVEA_5q14.3
PABLB_10p15.1a	ERVLE_3q26.2	ERV316A3_12p11.23b	MER4_2q14.1a
HERVFRD_7p13	LTR46_11q21	ERV316A3_3q29	HERVH_18q21.32
ERVLE_14q31.3e	MER4_5p12a	HERVH_3p22.2b	HERVH_22q11.1
MER4_6p12.1	ERVLB4_8p21.1c	HERVFRD_6q22.31	HERVL_8q24.3a
HERVL18_12q21.31	ERVLE_18q11.2a	ERV316A3_1q21.3b	HERVH_8q24.22a
HERVL_3p24.3b	MER4_Xq13.1	ERVLE_8p21.3d	HERVH_6q25.1
ERVLE_5q23.3g	HERVH_19p13.3a	HERVH_12q21.2b	HERVL40_18q11.2c
HERV9_19p13.3	HERVFRD_10p15.1a	HERVK11D_2q31.1	HERVH_15q25.3a
HERVL18_3q25.31	HERVH_3q26.31c	LTR46_6p22.2	HERVH_2q32.1c
MER61_4q31.23	MER4B_17p11.2c	MER101_8p21.3	HERVW_3q25.1a
PRIMA4_12p11.21a	HARLEQUIN_2q12.3	ERVLB4_6q16.1d	HERVH_2q23.3c
ERVLE_13q33.3d	HERVH_1q42.13b	ERVLE_8q24.22b	MER41_5q31.3a
HERVL18_1q32.2	HERVEA_5q35.3	MER4B_3q26.31	HERVL_1p22.2b
MER4_4p12b	ERVLE_15q21.2	HML3_3q26.1a	HERVH_6p23
HARLEQUIN_4p14b	ERV316A3_12p12.3c	ERV316A3_1p36.22a	HERV30_8q24.23
HERVS71_7q33	HERVH_6q24.1b	ERVLB4_10p14	ERVLE_7p22.1a
MER41_9q21.12	HERVL_5p14.1g	MER34B_6q14.2	ERV316A3_7p22.3
ERVLE_8q24.3j	MER4_4p16.3b	HERVIP10F_7p13	HERVH_11p15.4a
HUERSP3B_9p13.3a	ERV316A3_4q21.3	MER4_6p22.3d	PABLA_7q32.1
HML3_1p33	HERVH_3p22.3a	HERVL_12q21.2c	ERV316A3_5q31.3c
HERVL_9p24.1b	HML3_6q21b	HERVH_17p11.2	HERVFH21_8q11.21
ERV316A3_13q14.13	ERVLB4_17q25.3b	HERVH_1q42.13c	HARLEQUIN_1p13.2b
ERVLE_4p16.1b	ERVLB4_3p14.2	HERVH_21q22.2	HERVE_11q13.4c
	HERVP71A_13q21.32	HERVL18_15q21.3	HERVE_11p15.4
	HERVH_9p21.3a	ERV316A3_19q13.2	ERVLE_20q13.33b
	LTR25_1q22	HARLEQUIN_5q14.2	HERVH_9p13.3c
	MER4_8q12.1a	HERVL66_5q15	HML6_19p12e
	MER34B_9q22.31b	LTR57_2q37.1	MER4B_3q21.2
	MER61_6q22.33	HERVFRD_Xq21.33b	HERVE_10p11.21
	MER41_12p13.2	LTR57_22q11.21	ERVLE_6p22.1a
	HERVL40_7q21.2	HERVH_1q31.1a	ERV316A3_1q25.3b
	HERV3_1p34.3	HERVL_13q33.3	ERV316A3_8p21.2b
	HERVH_14q22.1a	ERVLB4_1p22.3c	MER4_3p25.1a
	HML3_7q36.3	HARLEQUIN_5q23.1	HML2_10q24.2
	HERVH_3p14.3b	MER4_3q29c	HML5_19p12d
	ERVLE_11q13.4a	ERVLB4_14q23.3	HERVH_11q13.4b
	HARLEQUIN_10q22.1	HARLEQUIN_20p12.1	HERVH_9q33.2a
	HERVH_6q25.3b	HARLEQUIN_11q22.1b	HERVIP10FH_5q32
	ERV316A3_15q24.1b	HERVH_12p13.31d	HML5_8p23.2b
	HERVP71A_5q14.3	LTR25_12p11.22b	HARLEQUIN_6p21.32
	HERVH_1q41g	ERVLE_1p13.3b	HERVL74_7p21.2a
	HML2_21q21.1	ERVLB4_1q23.1a	ERVLB4_21q22.2
	HERVL18_5q34	HERVP71A_12p13.33a	HML1_12q13.11
	HERVIP10FH_10q23.33	HERVE_10p13c	MER4_5p13.2a
	ERVL_6q16.1d	HERVP71A_12p13.33b	HERVK11D_5p13.2
	HERVH_3q25.1	ERV316A3_12q24.13	HERVH_1q42.2e
	HUERSP1_8q21.13	ERV316A3_3p21.31c	MER41_9q22.31
	MER41_Xq21.33b	ERVL_16p12.3	HML3_1q21.3c
	HERVL18_2p12	HERVK14C_16p12.3	HERVH_2p12a
	HARLEQUIN_4p15.2	ERV316A3_11q12.1a	ERV316A3_7q33a
	HUERSP3B_7p21.3	HERVH_6p21.2b	HML5_19p12e
	ERVLE_9q34.2	HERVH_8p23.1c	HML3_8q11.23a
	HERVL_10p13c	HERVL_2q33.3	HERVEA_Yq11.21
	MER4_7p11.2f	HERVH_13q31.1a	HERVH_11q22.2
	HERVL40_5q14.3d	HERVIP10F_2q34	HERVP71A_Xq24
	HERVS71_5q15	HERVL_12q21.2b	ERVLE_5q32
	MER4_4q26a	ERV316A3_9q32a	HERVH_18q12.2c
	MER4_10q23.31a	ERVLE_2p13.2a	ERV316A3_2p25.3b
	HML3_7p13	ERVLE_8p22a	HERVH_12p13.2a
	HERVH_3q21.3b	HERVIP10F_2p12	HERVH_13q21.32b
	ERVLE_1p36.12	HERVH_12p13.32	HERVIP10F_1p35.2c
	MER4B_5p15.1	HERVH_5p15.33	ERV316A3_16p12.1
	MER101_Xq23b	ERVLE_9q32a	HERVFC2_11p15.4
	HERVL_5q14.3b	PABLB_14q11.2a	HERVL74_7q21.3a
	MER61_Xq21.31a	HERVFRD_14q11.2	HERVL_4q13.2b
	HERVH_6q21a	HERVH_9p24.2a	ERV316A3_1p32.1c
	MER41_14q13.1	MER101_2q37.1	ERVLE_5q14.3h
	HUERSP1_5q14.1	HERVL_Xq21.33d	HERVL18_6q13
	MER41_17q23.3a	HERVH_16q22.1	HERVW_6q27a
	HML5_18q21.2	HML3_8q13.2	ERV316A3_13q14.11a
	HERVL_18p11.32a	HML6_7p13	MER41_2q11.2
	LTR23_4p16.3a	MER41_16p12.3	MER61_Xp11.4
	MER4_7q31.1a	HERVH_3q21.3a	HERVH_9q22.32
	HERVE_5q14.3b	HUERSP2_3q21.3	HERVI_16q22.2
	HERVE_8p12a	HML2_4p16.1a	LTR25_6q24.1
	PRIMA41_12p11.21	HERVL74_19q13.11b	HERVH_20p12.1c
	HERVL40_2q33.1	ERV316A3_3q13.12c	HERVL_12q21.1e
	MER4_8q12.1b	MER101_2q35a	MER41_22q12.3c
	ERVLB4_2q21.1c	HUERSP3B_3q28a	ERVLE_11q24.3e
	HML3_7q11.21	MER4_2q14.1b	HML6_2q14.3
	MER4B_3p21.2a	ERV316A3_14q13.3	PRIMA41_13q13.1
	ERV316A3_6q24.2a	ERVLE_1q23.1d	HERVH_3q26.1j
	ERVLE_2q21.2a	HERVH_3p26.3b	HERV9_17q22a
	HERVKC4_6p22.1	ERVLE_7q31.32g	ERV316A3_22q13.31b
	HERV3_7q11.21	HERVL66_19p12g	HML2_12q14.1
	HERVE_2p13.3a	HERVE_19p12	HERVH_20p13b
	PABLA_6p12.3	HARLEQUIN_6p21.33
	HERVIP10F_13q34	ERV316A3_4q31.23c
	HERVH_18q22.3b	MER101_1p31.3
	ERVLB4_3q11.2f	ERV316A3_2q12.3d
	HERVH_2q35a	ERVLE_3q28e
	HERV4_13q32.3	PABLA_2p25.1
	HUERSP3B_1q32.2	HERVH_2p22.2c
	ERVLE_16p12.1c	ERV316A3_21q22.3b
	MER61_13q22.1	HERV9_4p14
	HML3_12q13.11	HERVS71_18q21.1
	HERVW_5q12.1	HERVEA_19p13.2
	HML2_8p23.1c	ERVLE_1p35.2b
	HERVH_19p13.3c	MER41_1q44b
	HERVH_13q14.11b	HERVIP10F_14q11.2c
	ERVLE_6p21.32	HERVEA_19q13.33
	HERV9_1p31.3	ERV316A3_15q26.3a
	HERVK11D_11q14.3	HML2_8p23.1d
	MER4_13q12.12c	ERVLB4_5q12.3a
	HERVH_17q22b	ERVLE_4q21.1b
	PRIMA4_1q24.3	HUERSP1_7q21.12
	MER4B_Xq26.2a	ERVLE_8q13.2a
	MER4B_Xq26.2b	ERVLE_5q12.3a
	MER4B_5p14.1b	ERV316A3_6p22.1p
	MER41_17q25.3	ERVLE_1q23.2b
	HERVI_7q33b	HML5_1q22
	HERVH_1p31.1i	HERVW_6q24.2b
	HML4_3q26.2	MER61_16p12.3
	HML1_6q27a	HML3_3q13.11a
	MER4_12p12.2a	HERVH_17p12
	HUERSP2_17q12	HERVW_6p25.3
	HERVIP10F_1q25.1	HERVIP10FH_Xq24
	MER61_7q21.11	HERVL_3q25.32
	HERV3_14q11.2	MER4_12q12a
	ERVLB4_2p16.3	HERVH_3q28a
	HERVH_14q24.2c	ERV316A3_6p25.1e
	MER4_17q11.2a	HERVH_20q13.12c
	PRIMA41_1p36.13a	ERVLE_12p11.23
	HERV3_4q13.2b	HML3_16p13.3
	MER61_Xq25a	HERVH_4q22.3a
	ERV316A3_3q13.31b	HERVH_8q22.1a
	ERV316A3_5q14.3e	LTR25_2p13.3
	HERVH_11q25a	HERVH_3p22.3b
	ERVLE_12q22	ERVLE_1p35.1c
	LTR23_1q41	ERVLE_1p22.3a
	HERVH_12p12.3b	HERVH_19p13.2d
	HML6_16p11.1	HERVL_4q32.1a
	HERVL_5p15.2b	HERVFRD_6p24.2
	MER4_1q44a	HERVH_6p21.32
	HERVK11_1q32.3	ERV316A3_6p21.33b
	HERVW_6q23.3a	ERVLB4_7q36.1a
	MER101_2q13a	ERVL_22q12.3b
	ERVLE_7p22.1b	HERVIP10F_19p13.2b
	MER4_10p12.33	ERVLE_17p11.2c
	HERVIP10F_9p11.2	HERVL40_7q21.12b
	MER41_12q12	LTR25_3p22.1
	MER4_3q13.2b	MER61_13q14.2
	HUERSP3_2p23.1	HERVFH21_1q23.1
	MER101_10q23.33	HERVH_1p33
	HERVH_8p23.1i	MER41_6q23.2
	HERVP71A_15q24.2	HML2_4p16.1b
	HERV3_9q34.13	MER41_4p16.1b
	MER61_17p13.1	ERV316A3_12p12.3a
	HERVW_3p11.1	PABLA_6q27b
	HERVH_8p23.1d	MER101_18q21.1a
	HERVH_14q24.3b	HERVL_21q21.3i
	HERVK11_6q25.3	MER4B_12q22
	HERVH_2p16.2	ERV316A3_9q34.2a
	HUERSP3B_9p13.3b	HML1_6q22.32
	HERVIP10FH_6q25.3	HERVIP10F_16p13.13
	HERVIP10FH_4p13	HERVI_16p13.13
	ERVLB4_1p34.1	HML5_11q12.2
	HERVFRD_1q44	HARLEQUIN_2q32.1
	HML6_4q21.1	HERVH_10q22.3b
	HERVL_1q31.2c	ERV316A3_8q13.3a
	ERVLE_7q31.33a	HERVH_9q21.33c
	HERVH_4q22.1c	ERV316A3_6q22.31b
	ERV316A3_15q21.3c	MER4_8q24.3c
	ERVLB4_4q21.1a	HERVH_3p21.31a
	HERV9_12q23.3	HERVW_7q21.2
	HERVH_7q31.33b	HERVH_7q21.2
	ERV316A3_2q31.2	HUERSP3B_11p12
	ERV316A3_3q13.13d	HERVH_13q13.3a
	HERVH_16p12.3	HML3_13q12.11b
	ERV316A3_2q31.1b	ERVLE_4q24g
	ERVLE_20q13.33a	ERVLE_7q21.2
	HERVL_9q21.11a	MER61_2q35
	HERVFRD_19q13.41	HERVIP10FH_6q22.1
	ERVLE_8q24.11	HUERSP3_2p13.3
	MER4_4p12c	HERVL40_4q31.3a
	HERVP71A_2q33.1	ERVLB4_4q23b
	MER34B_1p13.2	MER4_6q22.1b
	ERV316A3_15q25.1b	ERV316A3_9q34.3b
	ERVLE_12p13.31c	ERV316A3_1p31.3f
	HERVH_7p14.3f	ERV316A3_6p21.2b
	HERVH_3q21.3c	HML6_19q13.41f
	ERVLE_1q31.3g	HUERSP1_15q22.31
	HERVH_4q31.21c	HERVL74_19p13.2b
	MER41_15q21.2a	ERVLE_Xq22.1a
	MER4_14q21.1a	HERVP71A_6p21.1b
	HERVP71A_8q24.13	ERV316A3_6p21.2a
	HERVH_11p15.4h	ERVLE_11q24.2a
	HERVH_4p15.2a	ERVLE_1q32.2a
	ERVLB4_8p12b	ERV316A3_1q32.2a
	ERVL_10p14	HML2_11p15.4a
	ERVLE_Xp11.4b	ERV316A3_4q31.23b
	HARLEQUIN_5q12.3	HERVH_4p16.1d
	HUERSP3_7q11.21a	ERVLE_9q21.13c
	HERVFC1_7q36.2	HERVS71_4p16.1b
	HERVH_12q21.32c	HERVH_13q14.2a
	MER4_6q26b	LTR19_4q35.1
	HERVL_6p25.2	HML6_19p13.2d
	MER4_1q25.1a	HERVK11_1p13.3
	ERVL_Xq28b	MER4_8q24.3b
	MER41_9q22.32	HML3_4q31.3
	HML3_3q22.1	MER34B_4q31.3
	ERVLE_3q25.1	HERVL40_4q31.3b
	HERVE_12q24.32	HUERSP1_11p15.4b
		HERVL40_22q11.23
		HML2_6q25.1
		HERVFRD_21q22.3
		HUERSP2_11q22.1c
		HERVH_4q31.1a
		HERVL_4q34.1c
		ERV316A3_4q31.1b
		HERVH_5q35.1a
		HERVH_3q13.2
		HERVH_7p21.1a
		ERVLE_5q31.3d
		MER41_1q41a
		MER41_14q32.2
		LTR57_18q21.1
		ERVLE_8p23.1b
		HERVL40_11q13.4b
		HERVH_6q11.1a
		HUERSP3_1q44
		MER4_2p21
		HERVH_3q11.1
		LTR25_21q22.11
		HERVW_15q21.2
		ERVLB4_11p15.5c
		MER41_1q44a
		HERVH_12q13.2b
		HERVH_2q33.2
		HML2_3p12.3
		ERVL_11p14.3
		MER101_1p35.2
		HERVEA_12p13.31
		HERV4_11q21
		HERVH_8q24.23c
		MER41_9q31.1c
		PRIMA4_Xp11.22
		MER61_1q24.3a
		HML6_11p15.4
		HERVW_3p24.3
		ERVLE_7q31.32f
		MER4_12q12e
		ERVLE_1p31.1k
		HML6_12q24.12a
		ERVLB4_11p15.5e
		HERVIP10FH_11p15.5
		HERVH_4q21.3
		HERVH_6p22.3d
		ERV316A3_8q23.1c
		ERVLB4_7p13
		HUERSP2_3q26.33
		HML3_4q34.1a
		HERVP71A_6p21.1a
		MER41_2q31.2
		ERV316A3_10q26.12
		HERVH_6q23.2a
		HERVH_11q13.2b
		HUERSP3B_1p33a
		HERVH_6q23.2c
		ERVLE_15q25.1f
		HERVH_6q23.2b
		PABLA_6q27a
		HERVE_3p26.3
		MER41_9p13.3a
		HUERSP3_2q24.2
		HERVW_1p33c
		HERVL_18q21.2a
		MER61_18q12.3a
		HERVE_4p16.1c
		HERVE_11q13.2b
		ERVLE_8p23.1e
		MER61_10q26.12
		HERVK11_1p33
		HERVL32_2q31.3
		LTR25_7q36.1
		MER4_6q14.2
		MER61_5p13.2
		HERVH_3q26.1i
		ERV316A3_1q25.2b
		HERV9_7p14.2
		ERVLE_11q23.3c
		MER4B_12p13.31c
		PRIMA4_14q22.1
		MER101_19q13.2c
		HERVH_6q23.1
		HARLEQUIN_1q32.1
		HERVS71_19p13.3
		HUERSP2_19q13.2
		HERV3_19q13.33
		ERVLE_5p12a
		ERVLB4_13q34b
		MER4_12q12d
		MER4_12q12b
		ERVLB4_11p15.5d
		ERVLE_8p23.1a
		HERVH_5q22.1
		HERVH_19q13.2a
		HML5_7p14.1
		HML2_22q11.23
		ERVLE_3p21.31a
		ERVLB4_22q13.31b
		MER101_18q21.1b
		MER61_6q14.1f
		HERV9_10p13
		MER41_6q14.1e
		HERVH_10q24.2a
		HERVK11_22q11.21
		HERVIP10F_22q13.2
		HERVP71A_12p13.31b
		MER4B_2q31.1
		HML2_3p25.3
		ERVLE_6q22.31c
		HERVH_4p16.1b
		HARLEQUIN_Yq11.221c
		HERVH_13q13.3b
		HERVW_Xq22.3c
		HERVH_11q13.2c
		HERVH_9q34.13
		PABLA_13q34
		ERVLB4_2q32.3
		HERVL40_6q26b
		MER4_1p12b
		ERVLE_5q22.3e
		HERVIP10FH_2p14
		HERVL_2p11.2b
		HML2_14q32.33
		HML2_11q12.3b
		ERVLE_4q21.23a
		HUERSP3_1q42.12
		HML2_7q34
		HML5_2q14.3
		HERVL_20p13
		ERV316A3_21q22.3e
		HERVL_5p13.3b
		ERVLB4_2q13c
		HERVL40_5q11.2
		HERV3_4p16.1
		HERVH_4q35.2c
		HERVH_19q13.41a
		MER4_7p14.3b
		ERVLB4_19q13.12
		HERVL40_Xp11.21b
		LTR46_16q23.1
		HERVH48_1p22.3
		HML5_12q21.32
		MER101_15q15.2
		ERVLE_4q28.1b
		HERVH_14q32.31b
		HERVL40_22q13.2
		ERVLE_16p12.1b
		HERVL_4q24d
		HERVE_19q13.41
		MER4_15q22.31a
		HERVL40_2p23.3b
		ERVLB4_Xp21.1e
		HERVEA_3q25.32
		ERVLE_12q13.11b
		HERVEA_19p12a
		HERVE_9q34.3
		HERVL_2q34c
		HERVL_4q35.2
		HERVH48_8q21.2
		HUERSP3_Xp11.21
		ERV316A3_6p22.1m
		ERVLE_8q22.3b
		HML2_7q22.2
		HML3_16p13.13
		HERVH_7q11.23a
		HERVH48_8q24.13
		HML3_1p21.3
		MER4_3p21.31a
		HERVK11_8p23.1c
		HERVL18_4p15.2b
		HERVL_7q36.1b
		MER41_1p34.3
		HERVH_1p34.3c
		MER4_15q22.31b
		MER61_4q31.21b
		HUERSP3B_Xq13.2b
		MER41_15q22.31b
		HERVIP10FH_15q25.1
		ERV316A3_2q35f
		HERVIP10FH_10p11.23
		HERVW_14q21.2
		HERVL18_Xq24
		HERVP71A_6q14.1
		ERVLE_1p36.13b
		MER4_13q32.3b
		ERV316A3_8q11.23b
		LTR25_7q21.12
		ERVLE_5q31.1d
		HERVS71_3p12.3
		MER41_Xq13.3b
		HERVL_12p13.1c
		LTR23_9q22.33a
		LTR23_9q22.33b
		HERVH_12p11.22a
		ERVLE_4p12e
		HUERSP1_14q23.1
		HERVL_1p22.2d
		MER101_1p22.2a
		ERVLB4_8q24.3d
		ERVLE_8q24.3h
		HERVH_5q23.2e
		HUERSP1_9q22.33
		HERV3_7q33
		HML3_1q25.2
		HERVE_2p14a
		PABLB_1q31.3a
		LTR19_6q25.3a
		HERVL40_9p24.1a
		ERVLB4_13q12.12a
		ERV316A3_1p32.1a
		HML3_4q13.3b
		HML4_19p12
		MER4B_3q25.33b
		MER4B_2p23.1
		MER4_1p21.3
		ERVLE_2q12.3e
		ERVLB4_3q29b
		HERVL_4p16.3a
		HERVH_4q35.2a
		HERVIP10FH_Xp21.1
		HERVH_3p12.3a
		MER101_22q12.3
		HERVH_11p15.4b
		HERVS71_11p15.4
		ERV316A3_8q24.12c
		HERVK11_19p12b
		MER4B_14q32.33d
		ERVL_1q44b
		MER61_1q23.1c
		HERVIP10F_8p11.22
		HML3_8p11.22
		ERV316A3_12q21.1
		HUERSP2_12q21.1
		HERVH_7q21.3b
		ERVLE_1q42.12a
		HUERSP3B_3q13.11
		HERVH_19q13.32d
		MER4_11q21d
		ERVLE_12q14.3a
		HERVH_1q41h
		MER4_12q12c
		MER41_8q24.3
		ERVLE_14q12b
		HERVH_11q24.1c
		ERV316A3_Xp22.11
		HARLEQUIN_7q32.1a
		ERVLE_15q24.3d
		MER4B_7q21.11b
		ERVLE_14q21.3e
		HERVE_11q13.4d
		HARLEQUIN_7q22.1
		ERVLE_20q13.12b
		ERV316A3_21q22.3d
		HML2_1q21.3
		ERV316A3_6q13b
		ERVLE_6p25.1a
		HERVW_5p13.2a
		ERVLE_7q22.1c
		HML3_3p22.2
		HERVL_7q11.21b
		HML1_11q13.4
		ERVLE_15q25.1a
		MER41_22q12.3e
		MER4_7q21.12
		HML2_11q12.3a
		MER41_9q31.1a
		HERVIP10F_1q44
		ERV316A3_6p25.1b
		ERV316A3_7q31.1c
		MER4B_11q13.2
		ERV316A3_11q23.3f
		MER41_19q13.43a
		ERV316A3_2p16.1a
		MER4_3p21.31b
		HERVH_8p23.1h
		HML1_Xq24
		HERVS71_8p23.1a
		HERV9_3q25.1
		MER4_21q22.3a
		HERVE_20p11.21b
		ERVLB4_17q24.3
		HERVH_9q22.33b
		HERVW_1p33b
		HERVE_17q11.2
		HML2_7q11.21
		HERVH_6q22.1c
		HERVH_1q24.2
		HERVFH19_13q34
		MER4_20q13.13
		HERVEA_5q22.2
		HERVIP10F_3p25.3
		HERVH_10p12.31
		ERV316A3_3q27.3e
		MER101_1p22.2b
		HML5_8p21.2
		HARLEQUIN_4q32.1
		ERV316A3_6p22.1k
		ERVLE_5q22.2b
		HUERSP3_1q23.3
		ERVLE_2q24.2c
		HERVH_3q22.1e
		MER41_6p21.32
		HML3_3q13.11b
		HERVW_6q22.1
		HERVH_2p11.2c
		HERVEA_19p13.3
		HML2_1q22
		HERVW_5p14.3
		HML3_9q34.13
		PRIMA41_20q13.33
		ERVLB4_9q22.2b
		MER101_15q12
		ERVLE_2q11.2c
		HERVEA_8q11.23b
		ERVLB4_16p13.3a
		ERVLE_2q24.2a
		ERV316A3_12p11.23a
		ERVLE_22q11.23b
		HERVL_5q12.3
		ERVLE_10p13a
		HML2_3q27.2
		ERV316A3_5q35.3d
		HERVH_19p12b
		HERVS71_12p13.31b
		ERVLE_1p35.1a
		HERVL40_7q21.12a
		ERV316A3_18q22.3e
		HERVIP10FH_8q24.3
		PABLA_11q12.1b
		HERVL_12q13.13
		HERVH_10p11.21
		ERVLE_2q14.1b
		MER34B_9q22.31a
		ERVL_14q22.1
		HERV3_7q34c
		MER61_10q21.3
		LTR57_5p12b
		PRIMA41_10p15.3
		MER4B_1p36.33
		ERV316A3_8q24.12b
		PABLB_12p11.21
		ERVLE_3p21.31d
		ERV316A3_Xq28i
		HARLEQUIN_4q13.2a
		HUERSP1_15q21.1a
		HUERSP3_2p25.2
		MER34B_19p13.11
		HUERSP1_1p13.3
		HERVK11_18q21.1
		HML2_9q34.11
		ERVLE_2q12.3c
		HERVL40_6q14.1
		ERVLE_8q24.3i
		HERVH_12p12.1b
		HERVL_12p12.1c
		HUERSP3_11p15.1
		ERVLE_19q13.12c
		ERVLE_17q21.31
		PRIMA4_21q22.3
		HERVH_7q22.1b
		HERVH_10p14a
		HERVL_6p21.33b
		ERVL_8p23.1
		ERVLE_15q15.1
		ERV316A3_3q12.1c
		HERVH_7q31.2
		HUERSP2_3q26.1e
		HERV3_14q32.33
		ERVLB4_13q14.11a
		HERVIP10FH_9p13.3
		PRIMA41_19p12c
		HML5_19p12f
		HML2_6p21.1
		LTR25_12p11.22a
		HERVIP10F_8p22
		ERVLE_5q31.3e
		ERV316A3_10p12.2.x
		ERV316A3_10p12.2.y
		MER4_4p12a
		HERVL_6q27a
		HERVIP10F_2q21.2
		HERVL_12p13.1b

## Sheet: LUSC
cluster_1	cluster_2	cluster_3
MER101_3p12.3	HERVL18_5p14.3	HML6_Xq13.2
HERVIP10FH_15q13.3	HUERSP3_18q23	ERV316A3_1q32.3a
MER4_2q21.1a	ERVLB4_7q22.3	HERVL66_19p13.11b
MER101_10q23.33	PRIMA41_3q21.3b	HERVL18_Xq13.3
MER101_2q21.1a	HERVFRD_8q13.2	HUERSP3B_11q14.1
LTR57_2q37.1	HERVE_12q13.13	ERVLB4_22q11.1b
ERVLE_17p13.1	LTR25_9q22.2	ERVLB4_9q22.33c
MER4B_21q22.3	HERVL_4q13.2b	HERVH_9q22.32
HARLEQUIN_1q32.3	ERVLB4_2p25.3	HERVH_4p15.1a
HERVH_7q34d	ERV316A3_8q22.1d	ERV316A3_6p25.3a
HERVE_11q13.4c	HERVS71_3q22.1	HERVIP10FH_9p13.3
HERVL40_18q11.2c	ERV316A3_9q33.2	ERVLE_14q31.3h
MER101_1p31.3	HERVL40_5p15.2	HERVIP10F_1p35.2a
HERVL74_19q13.11b	MER4B_4p16.1a	HERVIP10F_1p35.2b
ERV316A3_10q26.12	HERVL_Xq25o	HML1_8q12.1
HERVL74_8q21.2	HERVIP10FH_17q21.32	HERVL66_18q12.1
HERVH_4q34.1b	ERV316A3_20p11.21	HERVL18_4q24a
ERVLB4_21q22.3a	ERVLB4_Xq22.1h	HUERSP3_2q14.1
HERVH_9p13.3c	ERVLE_6q27d	MER41_14q12
MER4_5p13.2a	HML5_9q31.1	MER61_3p26.1
ERVLB4_10p14	MER41_5q32	HERVH_8q13.2
MER4_4q25b	PRIMA4_Xq23	HERVH_20q12b
MER101_10q11.22d	MER4_2p11.2d	HERVH_4q31.21b
MER4_22q13.31b	HERV30_3q25.2	HML5_8p12
ERV316A3_12p12.3a	ERV316A3_8q21.13g	MER4_15q21.2a
ERVLE_1p35.2b	HERVL_1q42.13	HERVH_3p12.3c
ERV316A3_1p22.3c	ERVLB4_8p21.1c	LTR57_9q22.32
HERVP71A_6p21.1b	MER4_1q44a	HERVH_10p15.1
HERVL40_7q21.12a	ERVL_10p14	PRIMA41_1p36.13a
HERVL_4q35.2	MER4_5q14.1	HERVL_6p21.33b
HERVEA_19p12a	ERV316A3_2p25.3b	MER41_3q13.13
HERVH_6p22.3d	HERVKC4_1q22	ERV316A3_11q23.3f
ERVLB4_1p36.12b	HERVIP10F_7p14.1	HERVH_Xq13.3a
HERVL18_1p12	HERVL_9p21.3a	HERVFRD_6q22.31
PRIMA41_9q34.3	ERV316A3_4p16.1f	HERVH_11q13.2c
HERVH_Xq13.2a	MER4_1p34.1c	HERVI_12p13.31
MER61_5q23.2a	ERV316A3_14q23.1e	HERVW_8q24.13
HERV4_19p12	ERVLB4_20p12.3c	MER4B_7q33a
HERVW_3p11.1	HERVL_1p22.2b	HUERSP2_3q26.1e
HERV4_11q21	MER4_20p11.21a	HERVH48_2p25.1
MER61_18q12.3a	MER4B_11q12.1	HERVH_2q35b
MER41_Xq13.3b	HML1_3q21.3	HERVI_18q21.1
HERV9_1p31.3	HERVH_8q22.1c	HERVW_4p14
HERVL40_3q12.2	HERVL40_1p32.3	ERV316A3_4p16.1g
ERV316A3_1q42.12b	MER4B_10q22.3	HERVIP10FH_6q26b
PABLA_6q26a	ERVLE_2q11.2a	HERVH_21q21.1b
HARLEQUIN_7p14.3	ERV316A3_3q27.3d	MER41_7q11.23
HERVL18_5q34	MER61_7p14.3b	HERVW_6p23
PABLA_2q32.2a	HERVW_8q12.1	HML4_4q13.3
MER41_6q21a	HUERSP3_2q14.2	HARLEQUIN_4p14b
HERVFH21_8q21.11	MER4_3q29f	HERVL_7q32.1
PRIMA41_7p14.1a	HERVH_3q25.2d	MER4_7p11.2f
MER101_6q22.32a	ERV316A3_21q22.3a	HARLEQUIN_Xp22.2
HERVH_3p22.2a	HERVFH21_1p36.31	HML5_12q12b
ERVLE_2p22.1b	ERV316A3_15q14a	ERV316A3_2q35i
PRIMAX_19q13.43	HERVH_7p14.3d	HERVH_10p12.1b
ERV316A3_6q25.1d	MER4_3p21.31b	ERV316A3_4q35.2b
HERVL_Xp11.21b	LTR25_1q22	ERVLE_11p15.5a
HERVK11_2q14.2	HUERSP1_15q23b	MER4B_1q24.2
HERVH_14q22.1b	MER4_17q11.2a	ERVL_1q41
HERVH_11q13.4b	MER61_12q23.3	HERVL_Xq21.2d
PRIMA41_19q13.2b	MER41_Xp11.23	HERVL_13q31.1a
HML4_8q24.3	HERVE_17q11.2	HERVH_7q35a
MER4_3q12.2	ERVLB4_8p23.1n	HERVH_11p15.4h
ERVLE_15q24.3d	HERVK14C_1q44	HERVFC1_11p15.4
HERVH_7p21.1b	MER41_9p13.3a	ERVLB4_Xq21.2
HERVL_12q13.13	HERVL18_6q23.3	ERV316A3_1q32.2c
HERV3_19q13.42a	HERVL18_4p15.2a	HERVFH21_10q22.1b
HERVE_4q31.22	LTR23_16q22.2	HERVFRD_Xq21.1b
MER34B_7q11.23a	HML1_Xq24	HERVH_Xp22.2c
HERVL40_12p11.21	HML5_19p12d	HML3_19q13.2
HUERSP1_2p22.3	MER4_6q14.3b	MER101_Xp22.13
HERVIP10FH_6q25.3	ERVLE_11q13.4a	MER41_12p13.2
HERVL18_15q21.3	PRIMAX_22q11.21	ERV316A3_5p15.32a
HERVW_2p22.3	HML1_22q12.2	ERV316A3_22q12.3b
MER4_12q24.31	MER4_20p11.23	ERV316A3_1q24.2b
HERVK14C_8q24.3b	MER4_20p11.21b	HML1_10q22.1
ERVLE_17q21.31	MER4_4q26a	ERVLE_8q24.3h
MER4_4p12a	MER61_6q15	ERV316A3_4p15.2e
HML3_7q11.21	MER4_11q14.1	ERV316A3_6p22.1l
MER41_22q12.3c	LTR23_4p16.3b	HERVH_3p11.1b
HERV4_6q14.1	HML2_15q25.2	HUERSP1_5q14.1
HML3_6p22.1	MER41_9q31.1a	HERVH_19q13.32a
HERVL_12q13.3	HERVFRD_2p11.2	HERVH_11q14.3
HERVW_3q25.1a	ERV316A3_13q31.1f	HERVH_4q31.3c
HUERSP1_7q21.12	ERVLE_8q24.11	ERVLB4_19q13.33a
HERVH_17p11.2	ERVLE_1p36.22	HARLEQUIN_11q22.3
ERV316A3_6p25.1e	ERV316A3_10q22.3c	HERVH_Yp11.2e
HERVK11D_2q31.1	PRIMA41_10p15.3	ERVLE_18q21.1b
PRIMA41_19p12d	ERVLE_14q21.3e	MER61_1p22.2a
MER41_19q13.2a	MER41_4p15.2	HERVEA_Yq11.21
ERV316A3_2q22.3a	ERV316A3_2q14.1c	MER61_Xq25a
HML2_4p16.1a	ERV316A3_1p32.3a	MER61_6q22.33
HERVIP10FH_11p15.5	ERV316A3_5q23.1h	ERVLB4_8p23.1k
HERVH_4p16.1d	HERVH_9q21.12	ERVLE_4p16.1c
HERVH_3q26.1i	ERV316A3_6q22.33	ERVLE_6p22.1a
HML3_4q34.1a	HERVE_11p15.4	HUERSP3B_3q26.31a
HERV9_6p21.2	HERVH_3q26.32c	ERVLE_7q32.2a
ERVLB4_1q23.1a	ERV316A3_12q21.1	ERVLE_9q32a
HERVH_10q22.3b	HUERSP2_3q21.3	ERV316A3_3q26.31
HERVL_12q21.2b	PRIMA41_7p14.1b	MER4_1q21.3
MER61_16p12.3	HERVP71A_1q44b	ERVLE_3q22.3b
ERV316A3_8q23.1c	ERVLE_11q13.5a	HERVL40_5p12
MER4_20q13.13	ERVLE_8q23.3f	HML5_6p22.2
PRIMA4_21q22.3	PRIMA41_20q13.33	HERVH48_7q33
ERVLE_12q13.12	MER4B_17p11.2a	HERVK11_6q25.3
ERVLE_1p31.1k	HUERSP3_7q31.1	HERVP71A_1p31.1b
HERVH_6p21.1	ERVLE_1q32.1e	HERVKC4_6q22.31
ERV316A3_9q32a	ERVLB4_15q13.3a	HERVL_6p12.3a
MER4_Xq21.33c	HERVK11_5q35.1	PRIMA41_19q13.2a
HERVL32_2q31.3	ERV316A3_6q22.31f	ERVLB4_5p15.2b
HERVH_9q34.13	HERVH_7p14.3b	MER4_3q27.3
HERVH_11q23.3b	ERVLE_Xp11.4b	HERVL_8q21.11
HML2_17p13.1	HUERSP3_11q24.2	LTR25_7q11.21
HUERSP3_6q22.31	HERVH_12p11.22a	ERV316A3_5p15.2a
HUERSP3B_3q28a	ERVLE_1p13.3b	HERVIP10FH_5q14.2
MER101_2q36.3	HML6_8q12.1	HERVL18_8p12
ERVLB4_14q21.1a	HERVH_14q11.2a	HERVH_6q22.31c
HUERSP3B_3q13.11	LTR46_Xq13.3	LTR25_Yq11.223d
MER41_6q14.1a	ERVLB4_3q11.2f	ERVLE_2q11.2b
MER61_2q31.1c	MER4_12q14.3	HERVL_18q22.2a
HERVP71A_12p13.31b	HERVW_6q23.3a	HERV3_3q21.3
HERV9_10q23.33	HARLEQUIN_1p13.2b	MER4_2q14.1a
HERVH_5p15.33	HERVW_1p13.3	MER34B_9q22.31a
HERVK11_4q21.21a	HERVH_3p14.3b	ERV316A3_1q25.3b
ERVLB4_9q22.2b	LTR25_11q24.3b	ERVLB4_19q13.42d
MER41_6p21.32	ERVLE_4q23d	ERVL_2p22.1a
HERVH_2q31.1c	HERVH_4q35.1a	ERVLE_14q32.32c
HERVL_10p13b	HERVH_5q14.3b	ERV316A3_11q22.1m
ERV316A3_4q21.1m	HERVH_Xp21.3b	HERVH_4q34.3b
ERVLB4_4q21.1a	HERVH_12p12.2b	HERVEA_5q35.3
ERVLB4_12q13.13	HML3_10q22.1	ERV316A3_12q23.2a
ERV316A3_22q13.33b	ERV316A3_8q21.13j	HML3_3q13.11b
HERVL_7q31.32	HERVH_9q33.1b	ERVLE_12q13.11b
HERVH_7q31.32b	HERVL74_10q23.33	MER101_3q13.11b
MER61_1p34.1a	HERVH_5q31.1b	LTR23_7q11.23a
HERVK11_18q21.1	HERVH_3q21.2a	ERVLB4_1q23.3d
MER61_1q24.3a	ERVLE_14q24.3	MER61_1q42.2b
HERVE_11q13.4e	ERVL_6q16.1d	ERVLE_22q13.2f
ERV316A3_5p13.3e	HERVH_17q12	MER4_4p12c
HERVL_2q36.1a	HERVH_Xp22.32b	HERV4_2q31.1
HERVIP10FH_16p12.3	MER4_Xp22.11b	MER61_1p34.1b
HML3_4q13.3b	HERVH_11p15.1b	ERVLB4_2q14.2a
ERVLE_4q13.3g	HERVH_8q21.3b	ERVLE_11p15.3
ERV316A3_15q25.1b	HERVH_21q21.1e	HML5_20p13
HERVL40_19p13.11	HERVH_19p13.3a	HML2_8p23.1d
HUERSP3B_1p34.2b	HERVH_9q22.33a	HML3_15q11.2
ERVLB4_Xp11.21b	HERVH_18q22.3a	MER61_6q24.1c
HERVW_2q32.3	HERVH_8q24.23a	ERV316A3_7q21.3c
HERVL40_3p24.3	HERVH_3q13.11	ERVL_14q22.1
HERV30_19p13.11	HERVL_13q33.3	HERVH_6p22.3a
HML2_3p25.3	PABLA_2p25.1	MER101_Xq23a
ERVLB4_17p13.3b	HERVH_10p11.22	HERVH_Xp22.33
ERV316A3_5q13.3c	HERVL_5q12.1a	MER4_2q36.3b
ERVLB4_2q13a	HERVL_1p32.2a	ERV316A3_6q22.1c
HERVW_19p12d	MER41_4p15.31	HERVL_12q21.1a
HERVW_15q21.2	ERVL_6q23.3b	HERVL40_6q16.1c
ERV316A3_3q27.3c	HERV9_7p14.1	HERVL_9p23b
HML1_19p12d	ERVLE_8q21.13a	ERV316A3_12q21.33f
PRIMA4_12p11.21a	PABLA_19q13.32	ERVLE_12p13.32
HERVL_6q22.31a	HERVH_1q32.2b	ERVLB4_8q11.21b
HERVH_16q24.1a	HERVW_2p25.3	ERVLE_5q32
HERVL_4q31.21b	HERVH_11q14.1f	HUERSP2_21q21.1b
PABLA_11q12.1b	MER61_1p22.2b	HERVE_4p16.3c
ERV316A3_3q25.2c	HERVE_2q24.1a	HERVL74_Xq13.2b
HML4_10p15.1	HERVW_5p12	ERVLE_19q12b
ERVLE_1p36.12	HERVH_5p12b	LTR25_7p13
HML1_10p15.1	HERVH_5q21.2b	ERVLE_1q25.3d
ERV316A3_2q35e	HERVL_12q12b	ERVLE_Xq26.3h
HERVH_1p31.3c	MER4_Xq22.3c	HERVFRD_8q12.1d
MER4_5p12b	HERVH_7q31.1c	PRIMA41_4q35.2
HERVL18_3q25.31	MER4B_12p12.1a	HERVL40_6q14.1
MER4_5p12a	HERVH_4q34.3c	HML6_6p22.2
HERVH_9q33.3b	HERVH_2p12h	HERVH_2q31.1b
HML3_8q11.23c	HERVH_21q21.1c	MER101_7q22.1b
HERVIP10F_1p36.33	HERVH_20p11.23b	HERVH_5q21.1b
ERVLE_9q22.31	HERVH_20p12.1a	HML3_1p36.33
ERVLE_8q24.3f	MER61_8q11.23a	ERVLB4_18q12.2d
LTR57_14q32.33a	HERVH_1q42.2e	HERVL_3q26.1h
ERVLE_5p15.31a	ERVLE_21q21.1e	ERV316A3_1q44b
ERV316A3_13q32.1b	MER101_6q16.1	HERVL40_1p31.1c
ERVLE_7q34b	MER4_Xq28c	HERVW_12q14.1
ERVLB4_8p21.1a	MER41_3p14.3a	ERV316A3_6q14.3b
HERVL40_15q23	HERVL_9p24.1b	HML1_19q13.41a
MER61_11q13.4	HERVL18_21q21.3	MER101_19p13.2
MER61_10q26.12	HML3_12q13.11	HML1_19q13.41b
HERV4_8q21.13b	HERVH_15q25.2	HML2_10q24.2
ERVLE_6q24.1a	MER101_2q33.1	MER4_2q14.1b
HARLEQUIN_17q21.33	HERVH_3q21.2b	ERVLB4_12p13.32
ERV316A3_3q12.1d	HARLEQUIN_7q22.1	ERV316A3_22q12.3a
HML2_1q21.3	HERV9_15q21.1a	MER41_13q34b
HERVL40_9p24.1a	ERVLE_22q13.31d	HML5_12p13.31
HERVL_1p22.2d	HERVH_2q35a	HERVL40_3q13.13b
HML3_3q27.2a	MER4_Xq28d	HERVL32_19q13.33b
HERVL_7q11.21b	HERVH_7q21.3b	HERVL_Xq25p
HERVK11D_6q22.31	ERVLB4_6q14.2	HERVIP10F_11q24.2
HERVH_11q14.1g	ERVLE_10p15.1d	ERVLE_8p11.23b
ERV316A3_5q23.1b	MER4_Xq28e	ERVLE_11p15.4f
HUERSP2_6p21.32	HERVIP10F_3q29	ERVLB4_1q23.3c
HERVH_3p21.31b	HERVW_4q23	ERV316A3_16p12.1
MER61_17p13.1	ERV316A3_12p11.22a	ERV316A3_8q13.2b
HML3_7p14.2	ERV316A3_22q13.31a	ERVLE_22q12.3b
MER4B_4q13.3e	MER101_3q27.2	ERVLE_3q13.13b
MER4_Xp11.21a	PABLA_6p12.2	HARLEQUIN_13q12.12
ERV316A3_21q22.3e	MER4B_5q14.3	HERVH_11p15.4g
HERVH_4q35.2c	MER61_5q32	MER4_5q35.2d
HERVK11_8p23.1c	LTR57_22q11.21	MER61_3p21.31
HERVH_4q32.2c	ERVLB4_3q26.33b	HERVE_2p13.3a
HERVL40_Xp11.21b	ERV316A3_3q22.2b	HERVIP10FH_3q13.33
HERVFC1_7q11.21	ERVLB4_12p13.31b	HML6_12p11.21
MER41_22q12.3e	HERVH_13q33.3	ERVLE_18q11.2a
HERVL40_22q13.2	MER4_2q37.3a	HERVH_1q42.13b
ERVLE_7q22.1c	PRIMA4_1q24.3	HUERSP2_17q12
LTR25_7q21.12	HERVH_11q24.2b	ERV316A3_12p12.3b
HERVL_20p13	HML5_1q42.12	HERVH_10p14a
ERV316A3_6q13b	ERVLB4_22q13.2	HML6_2q21.3
HERVL18_Xq24	HML2_9q34.11	MER41_1q42.3
HERVW_4q21.22	HERVH_1p11.2	ERVLB4_6q27d
HML3_3p22.2	HERVL_14q22.3b	ERVLE_7q11.21
HML3_19q13.41a	HERVE_8p12a	ERVLE_17q22a
HML5_2q32.1	ERVLE_7q21.3a	ERV316A3_14q13.1b
MER4_6q14.2	ERVLB4_8q24.3d	HERVIP10F_5q14.2
HERV3_7q34c	ERVLB4_1p34.2b	MER41_Xq13.3a
ERV316A3_21q22.3d	ERV316A3_3q27.3e	ERVLE_21q22.2
HERVW_2q11.2	HERVL18_2p12	HML5_19p12e
MER4_4p16.1a	HERVL18_4q21.23	HUERSP3B_11q14.3
HERVIP10FH_1q23.1	ERV316A3_13q13.3c	MER4B_5p14.1b
MER41_6q22.31b	MER61_4q21.23a	ERVLB4_2q32.1d
HERVH_3q25.1	ERVLE_22q13.31c	MER41_9p21.1a
MER61_7p13	HERVL_6q14.2	HERVFC2_11p15.4
MER41_14q32.12	HERVL_3p24.3c	HML1_3q26.31b
PABLA_18q23	LTR25_12p11.22b	HERVFRD_8q21.13b
HERV4_19q13.43b	ERVLB4_8p23.1e	MER4_4q32.1c
HUERSP3B_1q24.2	HUERSP3_3q29	HERVE_10p13a
MER41_19p12b	HERVL_2q32.1e	HML3_8p12
HERVFRD_20q11.23b	HERVFRD_1q31.3	HERVH_10q23.32
HERVIP10FH_16p11.1b	HERVEA_4q22.1	HERVL_10q23.2
MER4B_2q31.1	ERVLE_21q21.1a	ERVLB4_17q24.3
HERVL_7q36.1b	PABLB_Xp21.1a	ERVLB4_3q29b
HUERSP1_2q11.2	HERVH_8q22.3b	HERVW_13q21.1
HERVH_1p34.2a	HERVH_10q24.1	MER4_5p14.1b
MER4_7q21.12	HERVH_Xq28a	MER4_13q32.3a
ERVLE_8q11.21a	HERVH_3q21.3d	HERVIP10F_3p26.1
HERVH_1p34.1	HERVH_6q23.2e	HERVH_11p15.4a
HERVIP10F_22q13.2	HERVH_3q26.31a	HML6_20p11.21
ERVLB4_10q23.33c	HERVH_3p14.3a	HERVFH21_19p12
MER34B_12p12.1	HERVH_8q21.13a	MER61_4q32.3
HML2_1q22	HERVH_1p31.1k	MER101_13q21.31
HERVL_5q12.3	HERVH_12q14.1a	MER61_6q14.1c
MER41_3p22.1c	HERVH_2p24.3c	HERVK11_8q11.1
MER61_8q11.23b	HML3_14q32.32	HERVIP10F_13q34
ERVLB4_1p34.1	HERVH_5q31.1d	HERVH_11q13.3c
ERVLE_7q32.3a	ERVLE_18q21.1d	HERVH_5q31.1g
HERVS71_11p15.4	HML1_14q32.32	ERV316A3_2q32.2b
MER41_19q13.43a	HERVH_Xp22.32a	HERV3_19p12e
HML2_11p15.4a	MER4_18q21.1	HERVW_17q12b
HERVL74_2q11.2	HUERSP2_1q25.3	LTR25_12p11.22a
HERVKC4_6p22.1	HERVL_3q26.1f	HERVH_15q25.3a
HML6_3p25.1	HML3_12q13.12	HML5_11q12.2
HML3_19p12b	HERVH_3q27.3a	HML2_11q12.3b
ERV316A3_11q12.3	HERVL18_6q14.1	HERVE_4p16.1c
HERVL18_9p24.1	ERVLE_10q26.3d	HML1_6q27a
HERVH_11p15.4b	HERVH_16q21c	ERV316A3_5q14.3e
ERVLE_1q23.2b	HERVK11_12q23.3b	HERVW_3p24.3
HERVH_11q13.4a	HERVH_7q34a	HERVL_8q24.3a
HERVL_10p13c	LTR25_3q26.33b	HERVW_6q27a
ERVLE_4q21.23a	HERVIP10FH_22q12.2	HML5_Xq21.33
MER41_1q24.2	MER41_8q24.3	HERVH_6p23
ERV316A3_5p15.31	HERVH_5p15.31a	MER41_9q31.1c
HERV3_19q13.42b	HERVIP10F_7p13	LTR25_14q24.3
HML3_1p33	HERVI_7q33a	LTR46_16q23.1
MER61_5p13.2	HERV3_6p12.2	ERVLE_3p21.31f
MER41_14q32.2	HARLEQUIN_10q23.1	ERV316A3_1p36.22a
HERVL_13q12.12	MER61_7q21.11	MER4B_3q26.31
HERVH_10q23.31a	MER41_3q13.31b	ERVLB4_Xq21.33a
MER41_8q12.1a	ERV316A3_6q22.31g	HERVH_1q42.13c
ERV316A3_3p21.31c	MER4_3p25.1a	HERVFRD_8q12.1b
HML3_15q12	HERVH_3q24d	HML2_11q23.3
MER4B_3q25.33b	HERVH_7q31.1b	HUERSP1_3q27.1
HERVL_6p24.3a	HERVH_6q22.31g	HERVH_3q21.3a
ERVLB4_10q11.22a	HERVH_6p25.1	MER41_6q23.2
HERVL_12p12.1c	HERVH_7q34b	HERVH_6q23.2a
HERVIP10FH_Yq11.222b	MER4_3p25.1b	HERVW_1p33c
HERVL18_11q14.2a	HERVH_8q22.2	HML6_19p12e
HERVL_Yp11.2a	ERVLB4_9q21.33a	HERVL_Xq21.33d
HML1_2p11.2	HERVH_21q21.3b	HERVL66_19p12j
MER41_4q31.1	ERV316A3_6q14.2	MER41_9q21.12
HERVFH21_14q32.31b	HERVH_7q11.23b	MER61_12q14.2
HERVH_4p16.3b	HERVH_4q24b	ERVLE_3q13.2b
ERVLB4_11p15.5d	HERVH_11p11.12	HERVW_5q12.1
HERVEA_Xp11.22	MER4_14q22.3b	HERVI_14q11.2
HML1_11q13.4	ERVLB4_22q11.21a	ERV316A3_Xp11.3c
HERVW_7q31.32	HUERSP3_1q42.12	ERVLB4_18q22.2
HERVL40_19q13.42	HARLEQUIN_Xq23a	HERVH_1p31.1e
MER4B_12q22	HUERSP1_Xp22.2	HML2_20q11.22
LTR23_Xp11.21	HERV4_17p13.1	HUERSP2_Yq11.223
HERV30_6q22.31	HERVH_4q13.2	ERVLB4_15q23a
HARLEQUIN_5q14.2	MER41_17q22e	ERV316A3_11q13.2
HML3_13q12.11a	ERVLB4_1q25.1c	MER4B_17p11.2d
HERVP71A_12p13.33a	MER101_9q34.3	ERVLE_11q21c
HERVH_2p11.2c	HERVL_10q23.33a	ERVLB4_8p23.1b
HUERSP1_14q23.1	HERVFRD_Xp21.1	PABLA_19p12a
HERVIP10FH_2q14.2	ERVLE_3q11.2h	ERVLE_12p13.31a
HERVL40_4q32.1a	HERVE_9q22.2a	MER41_15q21.2a
ERVLB4_4q32.1b	HERVL_21q21.3f	PABLA_14q11.2
HERVH_10p12.31	ERV316A3_8q13.3a	ERVLE_4q22.1a
HERV30_11q14.2	ERVLB4_6q23.2c	ERVLE_5p13.3m
HERVH_5q32b	HERVE_19q13.41	HERVL_3q26.1e
MER41_5q31.3a	HML6_1p13.3	ERV316A3_8q13.3b
ERVLE_5q31.1h	ERVLE_4q31.1a	HML3_3q22.1
HERVH_13q31.3a	HERVH_2p16.1e	HERVH_3q26.1j
MER4B_7p14.3	ERVLE_13q31.2a	HUERSP3_8q11.1
HERVIP10F_3p21.31	HERVH_4q32.3d	HUERSP3B_3q26.31b
ERV316A3_7q31.1c	ERVLE_1q23.1a	HERVH_21q21.1d
HML2_14q11.2	ERVLE_6p22.2a	ERVLE_8q21.13d
PABLB_8q24.3a	HERVL74_6p25.1	HERVH_12p13.31e
MER41_6q14.1b	HERVI_7q33c	MER34B_11p15.5
HERVH_1q42.2a	HERVS71_7q33	ERVLE_17q24.3a
HERVL_9q22.32	HARLEQUIN_6q13	MER41_Xq21.33b
ERVLE_22q13.2a	PABLA_7q32.1	MER4_Xq21.33b
ERV316A3_9q31.3	ERVLE_15q21.2	MER4_Xq21.33a
HERVH_8q24.22a	MER41_12q12	MER4_5p13.1
HERVH_22q12.1	PABLB_8q21.11	MER4_2p24.3c
ERV316A3_12q21.33e	HERVH_Xq26.2	MER4_12q12e
HML6_7p13	ERVL_2q24.1a	LTR57_22q12.2
HERVH_2q23.3c	LTR25_3q24a	HUERSP2_3q26.33
ERV316A3_Xp22.11	HERVH_2p14b	HML5_18q21.2
LTR25_3q26.33a	HUERSP3B_11q24.2	HML3_10q11.21a
ERVLB4_14q32.11a	HERVL_Xq22.3c	HERVW_Xp11.3
HERVH_3q25.2c	HERVH_6p25.2	HERVW_12q13.3
HERVP71A_8q24.13	MER101_21q21.3c	HERVIP10FH_8q24.13a
MER101_12p13.31b	MER101_3q26.31	HERVH48_4p15.31
LTR25_2q12.1	ERVLB4_4q24g	HERVH_5q23.2f
ERVLE_3q26.33	HERVH_5p15.2a	HERVH_22q11.1
HERVH_6q12c	ERV316A3_2q35j	HERVH_21q22.2
MER4_Xq21.31g	HERVIP10F_2p12	HERVH_1p34.2b
MER4_Xq21.31f	HERVH_3q25.2b	HERVH_12q24.21
HML5_1q22	LTR23_7p11.2	HERVEA_1p21.1c
MER61_4q21.1b	HERV4_15q26.1	ERVLE_8q13.2a
HML5_8p21.2	HERVH_18q12.2a	ERVLE_3p24.3a
MER4_19p12a	HERVP71A_10q25.1	ERVLE_17q21.2b
HUERSP3B_3q23	ERV316A3_2q22.3c	ERVLE_14q12m
HML5_12q23.1	MER4_17q11.2b	ERVLB4_Xq21.33d
HERVW_5p14.3	ERV316A3_4p12g	ERV316A3_Xp21.1d
PRIMA4_1p12b	HERVH_8p23.2b	ERV316A3_8q24.22d
HERVIP10FH_2p14	MER61_13q22.1	ERV316A3_5p14.1b
HML6_4q21.1	HERVH_2p12d	ERV316A3_4q22.1a
HARLEQUIN_17q25.3a	ERV316A3_14q12d	ERV316A3_1q25.2b
ERVLB4_17q12	MER41_Xq26.2a	ERV316A3_4q31.23b
ERVLB4_12p13.31e	ERVLE_22q13.31e	ERV316A3_9p21.1b
ERVLB4_11p15.4c	ERVLE_4q32.1j	ERVLB4_4q25b
ERVL_11p14.3	ERV316A3_6p22.1a	ERVLE_20q13.33b
MER101_6p25.2c	HERVP71A_13q21.32	ERVLE_5q14.3h
HERVE_2p14a	HERVH_19q13.32b	ERVLE_7p21.3b
ERV316A3_12q24.13	ERVLE_4q35.2c	HERV9_17q11.2b
HERVL_17q12a	MER61_6q24.1b	HERVFRD_12q24.33
ERVLE_10p11.22b	HERVFH19_Xp11.3b	HERVH_11q25a
MER61_2q31.1b	MER4_2q37.3b	HERVH_2q31.1a
HML1_19p13.2	HERVIP10FH_Xq12	HERVH_5q15a
HERVW_11q14.1	HERVL74_14q12	HERVH_6q25.2a
HML5_12q12a	ERVLE_11q14.2c	HERVIP10F_19q13.31
ERVL_16p12.2	ERV316A3_18p11.32c	HERVIP10FH_8q21.3
HML2_4p16.1b	ERV316A3_6p25.1c	HERVL_6q14.1e
ERV316A3_6p21.2a	HERV3_19p13.3	HERVL18_2q23.1
ERV316A3_6p21.2b	HERVFRD_1p33	HML3_12q23.3
HUERSP1_15q21.1a	ERVLE_1p34.2g	HUERSP1_2q21.2
PABLA_1q25.1	HERVL_6q27e	HUERSP2_12q21.1
HERVH_5q14.3a	HARLEQUIN_19p12b	MER4_12q12d
LTR46_9q22.33	HML5_1q32.1	MER41_18p11.22
HERVE_8p23.1k	HERVL_12q23.3b	MER41_2q11.2
MER61_5q23.2b	HUERSP1_9q22.33	MER101_2q37.1
ERV316A3_3q25.2b	HERVE_7p22.1b	MER61_13q21.2
HERVK11_4q31.1	HERV9_12q22a	MER101_1p35.2
ERVLE_Xq26.2a	ERVLB4_Xq11.1b	HERVP71A_6p21.1a
ERV316A3_2q14.1b	HERVIP10F_2q21.2	HERVL_9q21.11a
HERVL18_2q32.1	HERVIP10FH_19p12c	HERVH_20q13.12c
HUERSP3_1q23.3	HERVH_11q13.2b	HERVH_2q32.1c
HERVH_20q13.12a	HERVL18_5q21.2	HERVH_7q22.1b
ERVLE_1p34.2a	HERVL18_12q21.31	HERVL_Xq21.33b
HERVW_5p13.2a	HERVL_18p11.32a	HERVK14C_7q36.1
ERVLE_1q44a	ERV316A3_4q32.1h	HML3_3q13.33
HML5_7p14.1	HERVH_1p35.1	ERV316A3_8q13.1b
HERVK11_22q11.21	MER4B_5p15.1	ERV316A3_2q14.1k
ERVLB4_17q25.3b	MER41_17q25.3	MER4_14q12b
ERVLB4_3q22.1a	ERV316A3_8q13.2a	ERV316A3_6p25.1d
HERVFRD_21q22.3	HERVI_18q12.2	ERVLB4_16q12.1
HERVH_19p13.2d	MER4_4q31.3b	MER4_12q12b
HERVH_13q14.2a	HERVH_15q26.1c	MER4_15q26.1a
HERVH_16q22.1	HERVH_5q21.1a	HERVL_2p25.3a
ERV316A3_18q22.3e	HERVH_5q34d	ERVLE_3q26.2
ERV316A3_6p25.1b	PABLA_2q32.2b	MER4B_Xq26.2a
HERVIP10FH_5q35.1	HERVL40_2q32.2	HERVL40_6q24.1
HERVP71A_2q32.2	ERVLE_6q22.31g	MER61_1q25.3
HML5_4q24	ERVLE_5q23.3g	ERVL_Xq21.1a
HERVE_11q13.4d	HERVP71A_Xq24	HERV30_10q21.1
HERV3_7q34a	HARLEQUIN_8p21.2	LTR19_12p13.31
HERVIP10F_16p13.13	HERV3_8q11.1	HERVH_19p13.12
HERVI_9q34.13	HML1_1p31.3	ERVLE_6q25.2a
HERVIP10FH_10p11.23	MER61_10q21.3	HERVL18_4q21.1
HARLEQUIN_1p33	HERVIP10F_19q13.41b	HUERSP3_5q21.2
HERVW_1p12b	HERV9_11p12	HUERSP2_11q22.1c
ERVLB4_Xp21.1e	ERVLE_5q35.3b	HML5_8p23.2b
HERVIP10FH_Xp21.1	HERVP71A_10q11.22	HML1_Yq11.21b
HARLEQUIN_11q22.1b	HERVEA_Yq11.221a	ERV316A3_2p22.3c
HERVH_5q23.2e	MER61_2p21	ERV316A3_3q28d
HML2_11q12.3a	HERVL_4p15.2a	HERVS71_10q21.1
MER61_4q31.21b	HERVH_3q26.1d	ERVLE_5p14.1e
ERVLE_5q31.1d	HERVH_12p12.2a	PABLA_5p14.1
HML5_16p11.2	HERVL32_1p31.1a	HERV9_5q31.2
ERV316A3_5q35.3d	MER41_3p12.1	HERVFRD_3q24
HERVW_1p33a	MER4B_Xq21.33	PABLA_6p12.3
HERVL_4p16.3a	MER61_12p13.31b	ERVLB4_7p14.1
HERVH_4q13.3	ERVLE_10p15.1c	HERVL_3p21.31a
HERVL40_1q44	MER61_7q31.33	HERVL74_8q21.13
MER4_4p16.3a	HERVFRD_7p21.3	ERVLE_11q23.3d
HERVH_17q25.3	HERVH_3q26.31c	HERVE_2q24.1c
HERVEA_19p13.3	HERVH_6q22.1c	MER34B_3q13.32a
HERVH_11q23.3a	HUERSP3B_12q23.3a	HERVFRD_Xq21.33b
HERVW_Xp11.21	MER4_13q12.12c	HERVS71_3p12.3
MER41_19q13.43b	LTR25_Yq11.223e	ERV316A3_3q13.11g
PABLA_16p13.3a	HUERSP3_2q34	HERVK11D_5p13.2
PABLA_16p13.3b	LTR25_19q13.43	HERVL_6q16.1a
HERVL_2p11.2b	HUERSP1_2q31.1a	HERVH_3q13.2
HERVH_7q21.2	HERVFRD_19q13.41	HERVE_10p13c
HERVI_16p13.13	MER61_7p15.3	ERVLB4_7p13
ERVLB4_19q13.12	HML6_11p15.4	HERVH_2p11.2d
HERVW_7q21.2	HERVL_2p24.2c	HERVL74_3q13.2a
ERVLE_7q21.2	PABLB_Xp21.1b	PABLB_20p12.3
HML1_6q14.1	HERV9_11q21	MER41_5q14.3a
HERVH_9q21.33c	HUERSP3B_19q13.31c	HERV9_14q21.3
HERVE_Xp11.23	HERVH_11q22.2	ERV316A3_5p15.2e
HARLEQUIN_17q25.3b	HERVIP10FH_2q14.3a	HERVL_5p15.32a
ERV316A3_6p22.1m	HERVH_14q32.2b	HML6_14q12a
ERVLE_2p14a	HERVE_8p23.1h	HERVH_1p31.1l
HERV4_15q21.3	ERV316A3_5q35.1a	MER101_4p16.1
HERVL_1q23.3b	HERVL_3p26.2	ERVLB4_8q13.2
HUERSP3_19q11	MER61_10p15.1	ERVLE_14q21.2a
HERVIP10F_6q15	HERVIP10FH_5q23.1a	ERVLB4_5p15.33a
HERVIP10FH_6q15a	HERVIP10F_2q34	HUERSP3_8q23.3
HERVH_19q13.41a	ERV316A3_6q22.31b	HERVH_12q15a
HERVH48_8q24.13	ERVLE_5p15.33a	ERVLE_9p21.1
HERVL_12p13.1c	HERVH_Xq22.2a	ERV316A3_6q24.2a
HERVW_Xq22.3c	HERVH_2p24.2	ERV316A3_18q12.3a
MER41_15q22.31b	HERVE_Xq21.32	HARLEQUIN_12p13.32
ERVLE_Xp11.22a	ERVLB4_3p14.2	HERVH_15q14b
ERV316A3_2q35f	HERVL_12q14.2a	HERVW_2q12.2
HERVL_18q21.2a	MER34B_9q22.31b	HML6_14q12b
ERV316A3_4q31.1b	MER61_7p14.3a	HERVH_2q24.3c
ERVLE_5q13.2a	ERVL_16p12.3	HERVH_10q23.31d
HERVIP10FH_5q31.3	ERVLE_8q12.2	HERVH_15q26.2a
HERVH_2q24.1e	ERVLB4_7p12.1f	ERVLE_19q13.31a
HERVH_13q13.3a	HERVKC4_19q11	HERVH_9q21.33f
HERVS71_4p16.1b	HERV3_14q11.2	MER4_3q13.2b
PRIMA4_Xp11.22	ERV316A3_5q35.3c	HERVH_7p14.3f
MER4_15q22.31a	ERV316A3_13q14.13	HARLEQUIN_5q31.2
ERVLB4_Xq26.3y	MER61_4q31.23	PRIMA41_5p12
HERVH_6p21.2b	HERVH_15q26.3a	MER61_13q21.33
HUERSP3_2p13.3	ERVLB4_2q32.3	ERVLB4_15q13.2c
HERV9_1p31.1	ERV316A3_4q22.3d	HERVL_4q34.1d
HERVL18_4p15.2b	HERVH_20p12.1c	ERVLB4_12q21.1a
HML3_5p15.33d	HERVH_7q22.3b	MER61_2q32.3a
HUERSP3B_11p12	ERVLE_4q31.21a	HERVE_11q13.4b
HML2_6q25.1	HERVL_21q22.12b	ERVLE_1p36.11c
ERVLB4_7q21.3b	HERVH_11q23.3c	ERVLE_1q42.2b
ERV316A3_1p31.3f	ERVLB4_10q26.2b	HERVH_11q21c
ERVLE_15q25.1a	ERVLE_4q35.1b	HERVL_15q26.2b
HERVH48_1p22.3	HERVL40_20q11.22	HERVL66_19p12e
ERVLB4_1q25.1b	ERVLE_5q31.3e	HARLEQUIN_6p21.33
MER61_13q14.2	HERVH_1p31.3d	HERVH_15q26.1a
HERVL_4q24d	MER34B_7q36.3a	ERVLB4_3q25.31b
LTR57_18q21.1	MER4_7q33a	MER4_12q13.3b
ERVLE_4p12e	ERVLE_1q42.12a	HERVH_12p12.3e
ERVLB4_10q22.3a	ERVLE_5q31.3d	PABLB_4p15.2
HERVH_12p13.31d	PABLA_6q27a	HERVH_6q22.31a
MER101_18q21.1a	MER41_6q26a	HERVH_2p14c
HERVH48_8q21.2	HERVIP10FH_6q26a	HERVW_6q24.2b
HERVH_Xq13.1b	PABLA_6q27b	HERVL_3q25.1
HERVH_Xq13.1a	HERVH_9p21.3a	MER4_4p12b
HML3_5p15.33c	ERVLB4_6q27e	HERVS71_19q13.12a
ERV316A3_2p16.1a	HERVH_7q31.2	LTR19_12q23.3
MER41_3p22.1b	HUERSP2_5p13.2	HERVL40_Xp11.4
HML3_Xq13.3	HERVE_10p13b	HERVH_6q22.31d
MER4_16q24.3	LTR25_6q27	MER61_5p12a
ERVLE_3p21.31a	ERV316A3_7q33a	ERVL_13q21.32c
HARLEQUIN_18p11.22b	ERV316A3_9p13.3b	HARLEQUIN_19p13.2
HERVL_10q11.21b	ERVLB4_12p13.2a	MER4B_2p23.1
ERVLE_8p23.1a	ERVL_2q21.1	ERVLE_8p12b
MER101_18q21.1b	HERVH_Xq27.2a	HERVIP10F_11q13.2
HERVH_11q13.2d	HERVH_6q14.1c	HERVH_12q22
HARLEQUIN_5q23.1	ERVLB4_2q21.1c	HERVL_8q21.3c
HERVH_9q21.33b	ERVLE_15q13.3a	HERVFRD_7q36.2
HERVK11_2q34a	HERVK11_11q13.2	MER61_Xp11.4
HML2_22q11.23	HARLEQUIN_5q12.3	HERVH_2p24.3a
HERVP71A_6q14.1	HERVFH19_7q32.2	HERV30_3p12.2
MER101_8p21.3	HML1_Xq26.3	MER101_12q13.3
MER34B_Xq24	HML2_7q22.2	ERVLE_2q35a
HERVH_4q31.1a	HERVW_11q23.2	HERVL_8q21.13d
LTR25_19p12a	HML2_19p13.3	HERVH_4p15.2b
HERVL18_13q13.1	HERVP71A_1q41	ERV316A3_9p23g
LTR19_4q35.1	HARLEQUIN_2q12.3	HERVH_6q16.1a
HERVH_3q11.1	ERV316A3_11p15.3	MER4_5p14.3b
HUERSP3B_1p34.2a	HUERSP2_12p12.3	ERVLB4_5q11.2a
HUERSP2_8q12.3	ERVLE_5p12b	MER4_4p16.1b
HERVH_9p24.2a	HERVI_7q33b	MER4_4q13.2b
ERV316A3_7q21.3b	HERVL40_2p24.2	MER4_8q12.1a
HERVEA_19q13.33	HERV4_13q32.3	ERVLE_14q31.3e
MER4B_9p13.3	MER101_7q36.1a	MER41_14q13.1
HERVL_21q21.3i	HML6_16p11.2	HUERSP2_21q22.3
ERVLB4_3q13.13	HERVL_17q21.32	HERVL74_7q21.3a
HERVL40_2q37.3	HERVH_6q21a	HERVW_6p25.3
PRIMA4_Xp11.21		PRIMA41_7q21.12
HERVH_19q13.2a		ERV316A3_4q13.2b
HERV9_4p14		HML3_4p15.1
ERVLE_8p22a		HUERSP1_12p12.1
HML6_20p13		MER61_4q28.3a
HERVH_1p33		ERV316A3_11q13.3
ERVLE_1p34.2f		HUERSP3B_19q13.2
ERV316A3_2q34f		PRIMA4_12p11.21b
HERVL_2q34c		ERVLE_17q11.1
PABLA_13q34		ERV316A3_12q23.3a
HERVIP10FH_Xq24		HERVL40_7q21.11
MER61_3q13.11		MER34B_1p13.2
ERVLB4_11p15.5e		HERVFRD_1p31.1b
HML2_3p12.3		MER41_17q11.1
HERVFH21_1q23.1		ERV316A3_2q31.1b
ERVLB4_8p12b		ERV316A3_7p22.3
HERVL_12q21.2c		HERVH_4q21.3
ERV316A3_9q34.2a		PABLA_8q24.3
HERVL_10q11.23		ERVL_Xq28b
HERV9_7p14.2		ERVLE_6q27c
MER41_1q44b		MER4_8q24.3e
ERVLE_11q24.2a		ERVLE_9p24.1b
ERV316A3_6q23.2b		ERVLE_9p13.1a
ERVLE_5q31.1b		HERVH_9q33.2a
HERVH_14q24.3b		HERVIP10F_1q25.1
HUERSP1_15q22.31		ERV316A3_18q11.2c
LTR25_3p22.1		MER41_10p15.1
HERVFRD_3p22.1		ERVLB4_7q21.3a
ERVLB4_5q12.3a		ERV316A3_5q35.2b
HERVH_5q23.2b		HML5_19p12f
ERV316A3_6p22.1p		HERVE_6q15
HERVL40_7q21.12b		ERV316A3_1p32.1c
HERVH_Xq22.2c		HUERSP1_20p12.3
PABLA_7q21.13		HERVEA_11q12.2
ERVLE_7q31.32f		HERVIP10FH_20q13.12
HERVH_6q23.2b		ERVLE_1p36.32b
MER4_7p22.1		HERVIP10FH_1q25.1
PABLB_14q11.2a		HUERSP3B_9p13.3a
ERVLE_4q24g		ERVL_1q42.13
HERVK11_1p33		HML1_1q23.3
HERVE_11q13.2b		HUERSP1_15q26.1a
HERVH_8q24.23c		HERV9_10q21.1b
ERVLE_15q25.1f		HML3_17q21.32
HERVH_12q21.2b		PABLA_6p21.2
ERV316A3_9q34.3b		HERVH_4q32.3a
ERVLE_Xq22.3i		HERVL40_9q21.32
HERVEA_Xp11.21		MER61_15q11.2b
HERVH_7p21.1a
HERVH_5q23.2a
HERVH_2p22.2c
ERVLE_4q21.1b
HERVH_13q13.3b
HML4_19p12
MER61_8q24.22
MER41_2q31.2
HERVH_1q31.1a
HERVH_12p13.32
HERVEA_1p21.1a
HERVL_4q34.1c
ERVLB4_Xq21.33b
HML3_8q13.2
HERVH_6q23.2c
HARLEQUIN_2q32.1
HERVH_5q13.3b
ERV316A3_1q32.2a
HERVH_6p21.32
ERVLE_1q32.2a
HUERSP3B_Xq21.33
HERVIP10F_14q11.2c
HUERSP3_2q24.2
HML3_1p21.3
HERVL74_19p13.2b
HERVH_10q24.2a
ERVLE_Xq22.1a
HERVEA_21q22.11
HERVL40_4q31.3a
HERVIP10FH_14q23.1
HERV3_4q13.2b
MER41_16p12.3
ERVL_Xp11.21a
HERV3_19q13.33
ERVLB4_Xq21.33c
HERVFRD_14q11.2
LTR19_6q25.3a
ERV316A3_20q13.33b
HERVIP10F_3p25.3
ERV316A3_6p22.1i
MER4_6q22.1b
HERVFH19_13q34
ERVLB4_2q37.3b
HERVIP10FH_6q22.1
HERVS71_1p35.1
HERVL40_9q34.3
ERVLE_2p14b
MER41_6p22.3
HERVFRD_9q22.31
HERVL_8q22.2
HML6_5q13.2e
HERVH_8q22.3a
HERVIP10F_19p13.11
HML6_19q13.41a
HML2_19q13.12b
PABLB_10p15.1b
HERVL_6q22.33b
HML3_8q24.13
MER61_2q35
ERVLE_8q21.3f
MER4_Xq21.1a
HERVW_17q12a
HERVL18_2q31.1
HERVH_8q22.1a
HML6_19p13.2d
HERVP71A_12p13.33b
ERV316A3_4q31.23c
HUERSP3B_1p33a
HERVEA_15q21.3
HERVK14C_16p12.3
HERVE_19p12
ERVLE_8q24.22b
HERVEA_6q22.31
MER4_1p21.3
ERVLB4_2q37.1a
ERVLE_4q21.3
LTR57_5q31.1
HERVL_1q23.3a
HERVL18_3p21.31b
PABLB_1q31.3a
MER4_5p12c
ERVLB4_3p21.31d
HERVE_2q37.1
ERV316A3_21q22.3b
HERVH_3p21.31e
MER4_12q12a
ERVLE_12p11.21b
HERV3_11q13.3
LTR25_21q22.11
HERVFH21_Xq11.2b
HERVEA_5q22.2
HERV4_4q12
MER4_7q21.2
HERVH_1q24.2
MER4_22q12.3
HUERSP1_1p13.3
HERV3_7q33
HERVFH21_Xq11.2a
MER34B_4q31.3
ERVLE_5q31.1c
PRIMA4_14q22.1
HERVL74_10p11.22
HERVL40_4q31.3b
HERVL74_19q13.41a
PABLA_19q13.2
HERVL_7p15.2a
HERVEA_12p13.31
MER34B_1q23.3a
HERVS71_19p13.3
ERVLB4_7q36.1a
HERVL_4q32.1a
ERVLB4_17q25.1
ERV316A3_19q13.2
ERVLB4_11p15.5c
ERVLB4_17q21.32
HUERSP1_11p15.4b
ERV316A3_21q22.11b
HERVL_1p22.1b
ERVLE_15q25.3b
MER4B_19q13.42a
HERVL74_17q12
HARLEQUIN_17q12
MER34B_19p13.11
ERVLE_11q23.3c
ERVLE_11q14.2a
HML3_1q25.2
ERVLB4_14q23.3
ERVLE_17p11.2c
ERVLE_8p23.1b
MER41_1q44a
HML2_1q23.3
HERVE_3p26.3
MER34B_1q23.3b
ERV316A3_22q13.1
ERVLB4_8q21.13d
HML3_16p13.3
HERVL40_11q13.4b
HML2_1q32.2
HERVL_11q12.2
HERVFRD_6p24.2
HUERSP3_2p25.2
ERVL_22q12.3b
HERVL_3p13b
MER61_5q22.1
ERV316A3_9q34.2b
HERV3_21q22.13
ERVLE_7p22.3
MER4_10q23.31a
ERV316A3_6p22.1n
MER41_Xq11.1c
MER4_19q13.41b
ERVLB4_19p13.11
MER4_7p14.3a
MER4_15q22.31b
HERVL_Xq11.1a
ERV316A3_15q21.2a
MER41_4p16.1b
HML5_Xq11.1
HERVH_7q11.23a
HML6_12q24.12a
ERVLE_5q12.3a
MER101_2q35a
MER101_2p25.2
HERVH_6q23.1
HERVL_1p31.1d
HML3_9q34.13
ERV316A3_6p22.1k
HERVH_12q13.2b
ERVLE_20q13.32b
HERVL18_11q12.2
HERV3_11q14.1
ERVLE_12q14.3a
MER61_3p11.2
HERV3_19p12a
ERV316A3_10q22.1a
LTR25_6q21
HERVH_3p22.3b
HERVE_7p22.1c
ERV316A3_6p21.33b
HERVEA_3q25.32
HERVL66_5q15
MER4_6p22.3d
ERVLE_2q24.2c
HERVH_2q33.2
HERVK11_1q23.3a
HERVH_4q22.3a
HUERSP2_14q31.3
HML3_4q31.3
ERV316A3_5q14.3a
PRIMA4_8p22
HERV3_4p16.1
LTR19_19p13.2b
HML3_17p13.1
HML1_6q22.32
ERVLB4_3p21.31a
HERVL_Xq22.3b
ERVLB4_4q23b
HML3_16p13.13
HML6_19q13.41f
HERV9_10p13
MER61_1q42.12
ERVLB4_4q31.23
HARLEQUIN_3q22.2
HML5_12q15
MER4_8q24.3b
MER4_8q24.3c
LTR25_2p13.3
ERVLE_1p13.2a
HML3_13q12.11b
MER41_7q21.13
ERVL_5q11.2
HERVH_3p21.31a
HERV9_6q25.1
MER61_Xp11.21
HERVW_11q14.2
HERVIP10F_19q13.41a
ERVLE_5q22.3e
HERVL40_22q11.23
ERVLE_1p22.3a
HERVFRD_18p11.23
ERVLB4_15q21.2
MER101_1p22.2a
ERVLE_8p23.1e
HERVS71_11q13.2
HERVE_9q34.3
HERVFRD_7q21.3
HERVFH21_8q11.21
MER61_12q15a
ERV316A3_3q13.12c
HML3_Xq21.1a
MER4B_12p13.31c
MER4_10p15.1
MER4_6p12.1
ERVLE_2p13.2a
ERV316A3_21q21.1f
ERVLE_2p25.3c
ERV316A3_11q23.1d
PABLB_Xp21.1c
MER41_6p23
HERVH_3q23a
HML1_19p12e
HERVI_11p15.4
HML3_8p11.22
HERVH_9q21.13b
MER4B_11q13.2
ERVLB4_7q34b
HERVH_7p21.3c
LTR25_7q36.1
HERVH_5q31.1f
HERVK11_1p13.3
ERV316A3_7p21.2a
HERVH_19q13.31
HERVS71_3q12.3
HERVH_4q35.2a
HERVL_7p21.3a
HERV9_11q22.1b
HERVL66_19p12a
ERVLE_21q22.3b
ERV316A3_22q13.31b
HERVFRD_10p11.22b
MER61_6q16.3a
ERV316A3_5q35.3a
HERVH_15q21.3b
HERVH_3q22.3b
HERVH_4q32.3c
HERVH_1q41a
HERVH_2p16.1a
HERVH_1p31.1f
ERVLB4_Xq26.2a
HERV3_2q14.3
HERVS71_3q24
HERV3_19q13.42c
ERVLB4_2q37.1b
ERVLE_18q21.33
MER41_22q12.3b
HERVH_Xp11.21
HUERSP3_10q23.33a
HUERSP3_10q23.33c
ERVL_7p12.1a
HML2_7q11.21
HERVW_1p33b
MER61_7q11.21
ERVLE_4q28.1b
ERVLB4_12q13.12a
HML3_3q26.1a
HERVL_4p13a
ERVLE_4q25d
ERVL_Xp11.21b
HERVIP10F_Xp21.1
ERVLE_7q31.32g
HERVK14C_15q21.1
HERV3_19p12b
ERV316A3_15q24.1b
HERVL_11q12.1c
MER4_9p13.3d
ERVLB4_Xp21.1d
ERV316A3_8q24.12c
MER101_11p12a
HML6_2q14.3
MER41_5q23.1b
ERVLB4_8p21.1b
ERVLB4_3q25.31a
HERVL_3q21.2
HUERSP3_1q44
HERVL_5q33.3
ERV316A3_1q21.3b
HUERSP1_1q44a
ERVLB4_2q31.1
HERVE_20p11.21b
HERVL_3q25.32
MER4_2q21.1e
HERVL18_6q13
HERVH_4p16.1b
MER4B_Xq11.1a
HERVL40_5q11.2
HERVH_6q24.1b
HERVFRD_11p15.4
ERVL_17q12
HERVL40_1q41
MER41_12p12.1b
ERVLE_19p13.2c
ERV316A3_12p13.33
ERVLE_18q12.2a
ERVLE_4q22.3a
ERVLB4_2p25.1b
HERVFRD_19p12
ERVLE_22q11.23b
LTR57_10p15.1
HML5_19q11
HERVL40_6q26a
ERV316A3_17p11.2b
PABLA_19p13.2
HERVH_2p13.3b
HML3_Yq11.221b
MER61_2p24.2
ERVLB4_7q36.3a
HML3_3q13.11a
HUERSP1_8q21.13
ERV316A3_Xq27.2c
HERVH_3p12.3a
ERV316A3_9p13.3a
MER34B_7q36.1
MER4_3q13.11
ERVLE_19q13.41a
HERVH_8p23.1h
ERVLE_15q15.1
