# Supplementary material for: Transcriptome Analysis of Human Endogenous Retroviruses at Locus-Specific Resolution in Non-Small Cell Lung Cancer
Source: Cancers (Basel). 2022 Sep 13;14(18):4433. doi: 10.3390/cancers14184433 (PMC9497127; doi:10.3390/cancers14184433)
Supplement: Supplementary file 1 [file cancers-14-04433-s001.zip › File_S8.xlsx]

## Sheet: LUAD
ENSEMBL	gene_name	HERV	spearman	spearman_Pval	spearman_adjPval
ENSG00000047936.11	ROS1	ERVLB4_11p15.5c	0.377389	0	0
ENSG00000047936.11	ROS1	HARLEQUIN_1q32.1	0.492572	0	0
ENSG00000047936.11	ROS1	HERVE_11q13.2b	0.394434	0	0
ENSG00000047936.11	ROS1	HERVH_19p13.2d	0.429406	0	0
ENSG00000047936.11	ROS1	HERVL_4q32.1a	0.452435	0	0
ENSG00000047936.11	ROS1	HML3_16p13.3	0.39941	0	0
ENSG00000047936.11	ROS1	HML5_1q22	0.390819	0	0
ENSG00000047936.11	ROS1	HML6_12q24.12a	0.416876	0	0
ENSG00000120217.14	CD274	ERVLB4_11p15.5c	0.416156	0	0
ENSG00000120217.14	CD274	ERVLB4_17q21.32	0.413867	0	0
ENSG00000120217.14	CD274	HML2_1q22	0.417171	0	0
ENSG00000120217.14	CD274	HML3_16p13.3	0.416276	0	0
ENSG00000120217.14	CD274	MER41_6p22.3	0.484581	0	0
ENSG00000120217.14	CD274	MER4B_12p13.31c	0.450225	0	0
ENSG00000157764.14	BRAF	ERVLB4_2q13c	0.376487	0	0
ENSG00000157764.14	BRAF	HARLEQUIN_7q22.1	0.419865	0	0
ENSG00000157764.14	BRAF	HERVL_12p13.1c	0.396012	0	0
ENSG00000157764.14	BRAF	HERVL_7q36.1b	-0.470871	0	0
ENSG00000163599.17	CTLA4	ERVLB4_11p15.5c	0.582536	0	0
ENSG00000163599.17	CTLA4	ERVLB4_17q21.32	0.441369	0	0
ENSG00000163599.17	CTLA4	HARLEQUIN_1q32.1	0.370202	0	0
ENSG00000163599.17	CTLA4	HML3_16p13.3	0.559671	0	0
ENSG00000163599.17	CTLA4	HUERSP2_19q13.2	0.550988	0	0
ENSG00000163599.17	CTLA4	MER41_6p22.3	0.564881	0	0
ENSG00000163599.17	CTLA4	MER4B_12p13.31c	0.436624	0	0
ENSG00000188389.11	PDCD1	ERVLB4_11p15.5c	0.552398	0	0
ENSG00000188389.11	PDCD1	ERVLB4_17q21.32	0.459996	0	0
ENSG00000188389.11	PDCD1	HML3_16p13.3	0.438894	0	0
ENSG00000188389.11	PDCD1	HUERSP2_19q13.2	0.47887	0	0
ENSG00000188389.11	PDCD1	MER41_6p22.3	0.545274	0	0
ENSG00000198400.12	NTRK1	ERVLB4_11p15.5c	0.552516	0	0
ENSG00000198400.12	NTRK1	ERVLB4_17q21.32	0.371737	0	0
ENSG00000198400.12	NTRK1	HML3_16p13.3	0.501852	0	0
ENSG00000198400.12	NTRK1	HUERSP2_19q13.2	0.423444	0	0
ENSG00000163599.17	CTLA4	HERVH_1q24.2	0.711108	3.8819e-79	1.26221e-76
ENSG00000163599.17	CTLA4	MER61_1q23.1c	0.660888	7.97088e-65	2.40664e-62
ENSG00000163599.17	CTLA4	HERVEA_12p13.31	0.645619	5.25971e-61	1.48219e-58
ENSG00000047936.11	ROS1	MER34B_4q31.3	0.631573	1.11218e-57	3.13412e-55
ENSG00000188389.11	PDCD1	HERVH_1q24.2	0.626253	1.82554e-56	6.43045e-54
ENSG00000047936.11	ROS1	HERVH_4q22.3a	0.613677	1.10297e-53	2.91392e-51
ENSG00000188389.11	PDCD1	MER61_1q23.1c	0.61254	1.9402e-53	6.30862e-51
ENSG00000047936.11	ROS1	HML3_4q31.3	0.601592	3.97578e-51	9.88566e-49
ENSG00000188389.11	PDCD1	HERVEA_12p13.31	0.58714	3.29277e-48	9.94182e-46
ENSG00000163599.17	CTLA4	HERVEA_5q22.2	0.578092	1.86689e-46	3.75777e-44
ENSG00000163599.17	CTLA4	ERVLE_13q12.11	0.56354	9.53398e-44	1.75218e-41
ENSG00000163599.17	CTLA4	HUERSP1_11p15.4b	0.550987	1.62161e-41	2.74182e-39
ENSG00000047936.11	ROS1	HERVH_7p21.1a	0.548133	5.05794e-41	1.18777e-38
ENSG00000047936.11	ROS1	HERVH_8q24.23c	0.546181	1.09453e-40	2.43505e-38
ENSG00000188389.11	PDCD1	HERVEA_5q22.2	0.535351	7.23827e-39	1.79978e-36
ENSG00000163599.17	CTLA4	HERVH_12q13.2b	0.527651	1.30129e-37	2.03725e-35
ENSG00000188389.11	PDCD1	ERVLE_13q12.11	0.518825	3.26249e-36	7.25817e-34
ENSG00000163599.17	CTLA4	HERVFH21_Xq11.2b	0.516298	8.06637e-36	1.13655e-33
ENSG00000047936.11	ROS1	HUERSP3B_1p33a	0.516655	7.10055e-36	1.5007e-33
ENSG00000188389.11	PDCD1	HERVH_12q13.2b	0.515084	1.24241e-35	2.62584e-33
ENSG00000163599.17	CTLA4	HERVH_6q23.1	0.511319	4.69489e-35	6.01373e-33
ENSG00000047936.11	ROS1	ERVLE_15q25.1f	0.512455	3.14938e-35	6.33925e-33
ENSG00000047936.11	ROS1	HERVH_6q23.2b	0.506302	2.68985e-34	5.16818e-32
ENSG00000120217.14	CD274	MER61_1q23.1c	0.501281	1.49961e-33	4.52776e-31
ENSG00000188389.11	PDCD1	HUERSP1_11p15.4b	0.498525	3.80529e-33	6.70206e-31
ENSG00000047936.11	ROS1	ERVLE_1q32.2a	0.496853	6.66812e-33	1.22549e-30
ENSG00000047936.11	ROS1	HUERSP3_2q24.2	0.495171	1.1683e-32	2.05767e-30
ENSG00000047936.11	ROS1	ERVLB4_11p15.5e	0.492121	3.20618e-32	5.421e-30
ENSG00000047936.11	ROS1	HML2_3p12.3	0.490866	4.84286e-32	7.87337e-30
ENSG00000165731.20	RET	ERVLB4_6q27e	0.499736	2.52996e-33	1.06941e-29
ENSG00000047936.11	ROS1	HERVIP10FH_11p15.5	0.489571	7.39894e-32	1.15835e-29
ENSG00000163599.17	CTLA4	HML3_1q25.2	0.486981	1.7173e-31	2.0164e-29
ENSG00000163599.17	CTLA4	PRIMA4_14q22.1	0.486603	1.94064e-31	2.21705e-29
ENSG00000120217.14	CD274	ERVLB4_17q25.1	0.488572	1.02479e-31	2.88784e-29
ENSG00000120217.14	CD274	MER4_7q21.2	0.488166	1.16928e-31	3.08908e-29
ENSG00000047936.11	ROS1	ERV316A3_1q32.2a	0.486321	2.12631e-31	3.09928e-29
ENSG00000047936.11	ROS1	ERV316A3_4q31.23c	0.486152	2.24527e-31	3.16358e-29
ENSG00000198400.12	NTRK1	MER61_1q23.1c	0.489388	7.85384e-32	3.31982e-29
ENSG00000047936.11	ROS1	HERVH_6q23.2c	0.480479	1.37853e-30	1.8797e-28
ENSG00000188389.11	PDCD1	HERVFH21_Xq11.2b	0.478931	2.24836e-30	3.65531e-28
ENSG00000047936.11	ROS1	HERVL_3q25.32	0.477747	3.26369e-30	4.31113e-28
ENSG00000047936.11	ROS1	ERV316A3_6p21.2a	0.477628	3.38777e-30	4.33942e-28
ENSG00000047936.11	ROS1	ERVLE_2q24.2c	0.476452	4.8975e-30	6.08875e-28
ENSG00000163599.17	CTLA4	HERVFH21_Xq11.2a	0.474055	1.03309e-29	1.09171e-27
ENSG00000047936.11	ROS1	HERVFH21_1q23.1	0.473196	1.34822e-29	1.62827e-27
ENSG00000188389.11	PDCD1	HERVH_6q23.1	0.470746	2.86805e-29	4.32973e-27
ENSG00000163599.17	CTLA4	HERVH_2q33.2	0.465905	1.2521e-28	1.26015e-26
ENSG00000120217.14	CD274	HERVH_1q24.2	0.46798	6.67647e-29	1.48534e-26
ENSG00000198400.12	NTRK1	HERVH_12q13.2b	0.468329	6.00388e-29	1.95219e-26
ENSG00000198400.12	NTRK1	HERVEA_12p13.31	0.467363	8.05418e-29	2.43179e-26
ENSG00000047936.11	ROS1	HERVIP10FH_Xq24	0.457969	1.33412e-27	1.52414e-25
ENSG00000188389.11	PDCD1	HERVFH21_Xq11.2a	0.458097	1.28474e-27	1.59723e-25
ENSG00000047936.11	ROS1	MER4_6q22.1b	0.457388	1.58248e-27	1.76031e-25
ENSG00000163599.17	CTLA4	ERVLB4_7q36.1a	0.45665	1.96467e-27	1.88742e-25
ENSG00000047936.11	ROS1	ERV316A3_21q22.3b	0.456479	2.06559e-27	2.23878e-25
ENSG00000047936.11	ROS1	HERVH_20q13.12c	0.455399	2.83228e-27	2.99301e-25
ENSG00000163599.17	CTLA4	HERVE_2p14a	0.452541	6.49381e-27	5.6019e-25
ENSG00000047936.11	ROS1	HERVH_2p22.2c	0.450077	1.31987e-26	1.32835e-24
ENSG00000198400.12	NTRK1	HERVH_1q24.2	0.453461	4.97567e-27	1.40214e-24
ENSG00000188389.11	PDCD1	HERVH_22q13.1b	0.450251	1.25579e-26	1.43465e-24
ENSG00000047936.11	ROS1	ERV316A3_6p21.2b	0.449591	1.51712e-26	1.49137e-24
ENSG00000047936.11	ROS1	HERVH_6p21.32	0.448909	1.84334e-26	1.77086e-24
ENSG00000047936.11	ROS1	MER4_12q12e	0.448624	1.99992e-26	1.87859e-24
ENSG00000198400.12	NTRK1	MER34B_4q31.3	0.45128	9.34283e-27	2.46826e-24
ENSG00000047936.11	ROS1	HERVEA_19p12a	0.446913	3.25335e-26	2.98955e-24
ENSG00000157764.14	BRAF	HERV3_7q34a	0.449486	1.56307e-26	3.6706e-24
ENSG00000163599.17	CTLA4	HERVH_3q22.1e	0.444671	6.13059e-26	4.98346e-24
ENSG00000047936.11	ROS1	ERVLE_11q24.2a	0.443413	8.73077e-26	7.58936e-24
ENSG00000047936.11	ROS1	MER4_12q12a	0.443386	8.7977e-26	7.58936e-24
ENSG00000047936.11	ROS1	ERV316A3_9q32a	0.441706	1.40683e-25	1.14092e-23
ENSG00000047936.11	ROS1	HML6_19q13.41f	0.441647	1.43054e-25	1.14092e-23
ENSG00000188389.11	PDCD1	HERV9_15q21.1a	0.440738	1.84213e-25	1.99659e-23
ENSG00000047936.11	ROS1	HERVL66_19p12g	0.43925	2.78285e-25	2.17835e-23
ENSG00000047936.11	ROS1	MER4_12q12b	0.439037	2.95187e-25	2.26865e-23
ENSG00000163599.17	CTLA4	HERV9_7p14.2	0.438822	3.13175e-25	2.40689e-23
ENSG00000120217.14	CD274	HERVEA_12p13.31	0.44167	1.42116e-25	2.73057e-23
ENSG00000163599.17	CTLA4	ERVLE_2p14b	0.437288	4.77932e-25	3.54672e-23
ENSG00000047936.11	ROS1	HERVE_9q34.3	0.437244	4.83772e-25	3.65162e-23
ENSG00000198400.12	NTRK1	HERVL40_4q31.3b	0.440463	1.98834e-25	4.66928e-23
ENSG00000157764.14	BRAF	HERVW_5p13.2a	0.439677	2.47228e-25	5.50017e-23
ENSG00000146648.19	EGFR	ERVLE_2q24.2c	0.449853	1.40726e-26	5.94847e-23
ENSG00000157764.14	BRAF	ERV316A3_8q24.12b	0.438914	3.05324e-25	6.45303e-23
ENSG00000047936.11	ROS1	MER41_1q44a	0.434951	9.05958e-25	6.71839e-23
ENSG00000047936.11	ROS1	HARLEQUIN_2q32.1	0.433969	1.18339e-24	8.62449e-23
ENSG00000188389.11	PDCD1	HERVE_2p14a	0.433496	1.34559e-24	1.42196e-22
ENSG00000047936.11	ROS1	ERVLE_1p31.1k	0.431677	2.20131e-24	1.57711e-22
ENSG00000188389.11	PDCD1	HERV9_7p14.2	0.432826	1.61355e-24	1.66353e-22
ENSG00000047936.11	ROS1	MER41_2q31.2	0.429898	3.55129e-24	2.50189e-22
ENSG00000105976.16	MET	ERVLB4_6q27e	-0.443711	8.03028e-26	2.7364e-22
ENSG00000105976.16	MET	HERVL66_1q42.12	-0.442004	1.29473e-25	2.7364e-22
ENSG00000163599.17	CTLA4	HUERSP3B_3q13.11	0.428904	4.63325e-24	3.37668e-22
ENSG00000047936.11	ROS1	ERV316A3_4q31.23b	0.427657	6.46023e-24	4.47662e-22
ENSG00000047936.11	ROS1	HERVH_4q21.3	0.426821	8.06784e-24	5.50044e-22
ENSG00000047936.11	ROS1	ERVLE_4q24g	0.42494	1.32674e-23	8.76273e-22
ENSG00000120217.14	CD274	HUERSP3_2p25.2	0.428326	5.4057e-24	9.5208e-22
ENSG00000105976.16	MET	HML2_8p22	-0.435369	8.08277e-25	1.13886e-21
ENSG00000047936.11	ROS1	ERV316A3_9q34.3b	0.423111	2.14586e-23	1.37433e-21
ENSG00000188389.11	PDCD1	ERVLB4_7q36.1a	0.422722	2.37612e-23	2.09247e-21
ENSG00000047936.11	ROS1	HERVE_4p16.1c	0.418966	6.31178e-23	3.86665e-21
ENSG00000047936.11	ROS1	HERVIP10FH_6q22.1	0.418892	6.43378e-23	3.88508e-21
ENSG00000163599.17	CTLA4	HERVH_22q13.1b	0.418476	7.16266e-23	4.73071e-21
ENSG00000163599.17	CTLA4	HUERSP1_15q21.1a	0.418246	7.60027e-23	4.94252e-21
ENSG00000047936.11	ROS1	ERV316A3_1p31.3f	0.41789	8.33081e-23	4.95977e-21
ENSG00000047936.11	ROS1	HERVEA_12p13.31	0.41686	1.08547e-22	6.37263e-21
ENSG00000163599.17	CTLA4	HERVL40_4q31.3b	0.416943	1.06276e-22	6.70488e-21
ENSG00000047936.11	ROS1	HERVL40_4q31.3b	0.415719	1.45417e-22	8.42027e-21
ENSG00000047936.11	ROS1	HERVH_1p33	0.414763	1.85608e-22	1.06022e-20
ENSG00000163599.17	CTLA4	MER4_7q21.2	0.413356	2.6541e-22	1.62593e-20
ENSG00000047936.11	ROS1	MER41_6q23.2	0.412086	3.6605e-22	2.06306e-20
ENSG00000120217.14	CD274	HUERSP1_11p15.4b	0.416248	1.27011e-22	2.06491e-20
ENSG00000198400.12	NTRK1	HML3_4q31.3	0.416143	1.30457e-22	2.7572e-20
ENSG00000120217.14	CD274	MER41_17q23.3b	0.414941	1.77376e-22	2.77692e-20
ENSG00000047936.11	ROS1	LTR25_2p13.3	0.409052	7.84531e-22	4.36344e-20
ENSG00000188389.11	PDCD1	ERVLE_2p14b	0.408821	8.30996e-22	7.02524e-20
ENSG00000188389.11	PDCD1	PRIMA4_14q22.1	0.407177	1.25175e-21	9.98332e-20
ENSG00000198400.12	NTRK1	HERVH_4q22.3a	0.41001	6.17171e-22	1.18581e-19
ENSG00000157764.14	BRAF	HERV3_7q34c	0.407562	1.13736e-21	1.60254e-19
ENSG00000188389.11	PDCD1	MER4_7q21.2	0.404703	2.308e-21	1.7738e-19
ENSG00000047936.11	ROS1	ERVLB4_10p14	0.403029	3.48187e-21	1.88691e-19
ENSG00000188389.11	PDCD1	HARLEQUIN_6q23.1	0.402728	3.74902e-21	2.82984e-19
ENSG00000047936.11	ROS1	ERV316A3_10q26.12	0.401142	5.52082e-21	2.95399e-19
ENSG00000047936.11	ROS1	ERVLE_2q12.3c	0.400925	5.81921e-21	3.07472e-19
ENSG00000047936.11	ROS1	MER4_12q12d	0.400445	6.53907e-21	3.41243e-19
ENSG00000163599.17	CTLA4	HUERSP1_9q22.33	0.400903	5.8507e-21	3.48323e-19
ENSG00000047936.11	ROS1	ERVLE_9q32a	0.399787	7.67136e-21	3.95449e-19
ENSG00000188389.11	PDCD1	HML3_1q25.2	0.400766	6.04822e-21	4.48523e-19
ENSG00000105976.16	MET	HERVH_3q26.1a	-0.410487	5.47591e-22	5.78667e-19
ENSG00000188389.11	PDCD1	HERVH_2q33.2	0.399458	8.30799e-21	6.05481e-19
ENSG00000047936.11	ROS1	HML2_4p16.1b	0.397489	1.33562e-20	6.80203e-19
ENSG00000047936.11	ROS1	ERVLE_7q21.2	0.397163	1.44436e-20	7.26823e-19
ENSG00000163599.17	CTLA4	HERVE_10p13c	0.397655	1.28329e-20	7.33038e-19
ENSG00000047936.11	ROS1	MER61_2q35	0.396091	1.86777e-20	9.28831e-19
ENSG00000047936.11	ROS1	HERVK11_1p33	0.396006	1.90622e-20	9.36929e-19
ENSG00000198400.12	NTRK1	PRIMA4_14q22.1	0.400931	5.81076e-21	9.42671e-19
ENSG00000120217.14	CD274	HERV4_8q24.3	0.400147	7.03045e-21	9.58636e-19
ENSG00000188389.11	PDCD1	HUERSP1_15q21.1a	0.396009	1.90447e-20	1.36444e-18
ENSG00000047936.11	ROS1	HERVEA_3q25.32	0.394204	2.92891e-20	1.42305e-18
ENSG00000047936.11	ROS1	ERVLE_8q13.2a	0.392943	3.95057e-20	1.83506e-18
ENSG00000047936.11	ROS1	HERVFRD_6p24.2	0.39297	3.9252e-20	1.83506e-18
ENSG00000047936.11	ROS1	ERVLB4_13q34b	0.392431	4.45881e-20	2.04863e-18
ENSG00000163599.17	CTLA4	ERVLE_6q22.31b	0.39321	3.70868e-20	2.06271e-18
ENSG00000157764.14	BRAF	HERVH_3p21.31a	0.396012	1.90343e-20	2.51432e-18
ENSG00000146648.19	EGFR	HERVH_3q26.1b	-0.406885	1.34573e-21	2.8442e-18
ENSG00000163599.17	CTLA4	MER101_19q13.2c	0.391598	5.42724e-20	2.94115e-18
ENSG00000047936.11	ROS1	HERVEA_6q22.31	0.389642	8.59107e-20	3.82257e-18
ENSG00000163599.17	CTLA4	ERV316A3_8q11.23b	0.389886	8.11322e-20	4.34108e-18
ENSG00000047936.11	ROS1	ERVLB4_1q23.1a	0.388446	1.13584e-19	4.89946e-18
ENSG00000047936.11	ROS1	HERVH_10q22.3b	0.388446	1.1359e-19	4.89946e-18
ENSG00000163599.17	CTLA4	MER34B_19p13.11	0.387646	1.36835e-19	7.23002e-18
ENSG00000047936.11	ROS1	HERVIP10F_19p13.2b	0.386159	1.93187e-19	8.24849e-18
ENSG00000047936.11	ROS1	HERVH_17p11.2	0.385678	2.15896e-19	9.12591e-18
ENSG00000157764.14	BRAF	LTR23_9q22.33b	0.390242	7.46447e-20	9.28009e-18
ENSG00000105976.16	MET	ERVLE_3q26.1a	-0.396925	1.5295e-20	1.29304e-17
ENSG00000188389.11	PDCD1	HML5_8p21.2	0.386216	1.90652e-19	1.29982e-17
ENSG00000120217.14	CD274	HERVH_6q23.1	0.387871	1.29869e-19	1.6635e-17
ENSG00000157764.14	BRAF	ERVLE_20q13.12b	0.387064	1.56661e-19	1.69797e-17
ENSG00000157764.14	BRAF	HERVW_14q21.2	0.387094	1.55542e-19	1.69797e-17
ENSG00000157764.14	BRAF	HERVH_14q32.31b	0.386321	1.86052e-19	1.9661e-17
ENSG00000198400.12	NTRK1	MER4_7q21.2	0.386732	1.69187e-19	2.16713e-17
ENSG00000047936.11	ROS1	HERVH_7q21.2	0.38147	5.66443e-19	2.32462e-17
ENSG00000188389.11	PDCD1	HERVH_3q22.1e	0.38299	4.00419e-19	2.5645e-17
ENSG00000198400.12	NTRK1	HUERSP1_11p15.4b	0.385696	2.15006e-19	2.67303e-17
ENSG00000163599.17	CTLA4	HML3_8q24.13	0.380829	6.55203e-19	3.29707e-17
ENSG00000188389.11	PDCD1	HUERSP3B_3q13.11	0.381774	5.28476e-19	3.33413e-17
ENSG00000198400.12	NTRK1	MER34B_19p13.11	0.384525	2.81584e-19	3.40073e-17
ENSG00000163599.17	CTLA4	MER41_6p21.32	0.380345	7.31262e-19	3.63652e-17
ENSG00000188389.11	PDCD1	ERVLE_6q22.31b	0.381302	5.88492e-19	3.65817e-17
ENSG00000047936.11	ROS1	ERV316A3_2q12.3d	0.379029	9.84817e-19	4.00271e-17
ENSG00000047936.11	ROS1	HERVW_7q21.2	0.378966	9.98883e-19	4.02122e-17
ENSG00000120217.14	CD274	ERVLE_13q12.11	0.383684	3.41584e-19	4.24669e-17
ENSG00000047936.11	ROS1	HERVP71A_6p21.1b	0.378494	1.11106e-18	4.43062e-17
ENSG00000047936.11	ROS1	HML6_11p15.4	0.378235	1.17776e-18	4.60964e-17
ENSG00000157764.14	BRAF	MER4_7p14.3b	0.382479	4.49996e-19	4.63935e-17
ENSG00000157764.14	BRAF	HUERSP3B_Xq13.2b	0.38187	5.17081e-19	5.08303e-17
ENSG00000165731.20	RET	HERVL66_1q42.12	0.39199	4.94786e-20	5.22865e-17
ENSG00000188389.11	PDCD1	ERVLE_3p21.31d	0.379361	9.13557e-19	5.59653e-17
ENSG00000047936.11	ROS1	HERVFRD_7q21.3	0.376958	1.56862e-18	6.08307e-17
ENSG00000163599.17	CTLA4	HML6_4q21.1	0.377179	1.49303e-18	7.25407e-17
ENSG00000157764.14	BRAF	HERVW_7q21.2	0.379897	8.0939e-19	7.43759e-17
ENSG00000047936.11	ROS1	HERVL32_2q31.3	0.375777	2.04279e-18	7.84989e-17
ENSG00000047936.11	ROS1	HERVH_19q13.2a	0.375696	2.08009e-18	7.92122e-17
ENSG00000133703.13	KRAS	PRIMA4_12p11.21a	0.393017	3.88158e-20	8.20373e-17
ENSG00000188389.11	PDCD1	HML6_4q21.1	0.377313	1.4489e-18	8.74928e-17
ENSG00000188389.11	PDCD1	ERV316A3_8q11.23b	0.3768	1.6254e-18	9.41171e-17
ENSG00000198400.12	NTRK1	HUERSP1_1p13.3	0.379577	8.70185e-19	9.94128e-17
ENSG00000047936.11	ROS1	HERVE_19p12	0.374541	2.68998e-18	1.01523e-16
ENSG00000157764.14	BRAF	HERVFRD_7q21.3	0.37827	1.16858e-18	1.02908e-16
ENSG00000047936.11	ROS1	ERVLE_2q14.1b	0.374161	2.92648e-18	1.08511e-16
ENSG00000105976.16	MET	HUERSP1_20p12.3	-0.387037	1.5762e-19	1.11043e-16
ENSG00000157764.14	BRAF	MER61_4q31.21b	0.377528	1.38043e-18	1.14413e-16
ENSG00000047936.11	ROS1	HUERSP3_1q44	0.37388	3.11471e-18	1.14486e-16
ENSG00000163599.17	CTLA4	HUERSP1_1p13.3	0.37502	2.41807e-18	1.14845e-16
ENSG00000047936.11	ROS1	MER61_16p12.3	0.37302	3.76778e-18	1.37297e-16
ENSG00000146648.19	EGFR	HERVFRD_7q21.3	0.387844	1.30681e-19	1.38097e-16
ENSG00000047936.11	ROS1	HUERSP3B_11p12	0.372948	3.82858e-18	1.3832e-16
ENSG00000146648.19	EGFR	HERVH_3q26.1a	-0.386682	1.71149e-19	1.4469e-16
ENSG00000120217.14	CD274	HERVH_3q26.1a	-0.378154	1.19936e-18	1.44848e-16
ENSG00000157764.14	BRAF	LTR23_9q22.33a	0.37607	1.91344e-18	1.47057e-16
ENSG00000157764.14	BRAF	HERVL_20p13	0.375262	2.2916e-18	1.72975e-16
ENSG00000120217.14	CD274	HERVP71A_12p13.33a	0.377199	1.48633e-18	1.7452e-16
ENSG00000198400.12	NTRK1	HERVEA_5q22.2	0.376679	1.66997e-18	1.85762e-16
ENSG00000047936.11	ROS1	ERVL_11p14.3	0.370903	6.00584e-18	2.13333e-16
ENSG00000047936.11	ROS1	ERV316A3_6p25.1e	0.370746	6.2157e-18	2.18948e-16
ENSG00000120217.14	CD274	MER34B_19p13.11	0.376036	1.92826e-18	2.2029e-16
ENSG00000198400.12	NTRK1	HML3_1q25.2	0.375423	2.21065e-18	2.33611e-16
ENSG00000163599.17	CTLA4	HERVH_2p11.2c	0.371583	5.173e-18	2.42958e-16
ENSG00000120217.14	CD274	ERV316A3_3q27.3e	0.374936	2.46396e-18	2.74083e-16
ENSG00000047936.11	ROS1	HERV4_11q21	0.369347	8.44161e-18	2.90103e-16
ENSG00000105976.16	MET	PABLB_20p12.3	-0.38201	5.00786e-19	3.02403e-16
ENSG00000163599.17	CTLA4	ERVL_22q12.3b	0.370059	7.22549e-18	3.24916e-16
ENSG00000198400.12	NTRK1	HERVH_6q23.1	0.373762	3.19733e-18	3.29637e-16
ENSG00000157764.14	BRAF	HERVL40_1q44	0.371937	4.78437e-18	3.37059e-16
ENSG00000047936.11	ROS1	HUERSP3_2p13.3	0.368523	1.01019e-17	3.38895e-16
ENSG00000047936.11	ROS1	HERVH_12q13.2b	0.368334	1.05256e-17	3.50327e-16
ENSG00000047936.11	ROS1	ERVLB4_2q32.3	0.367847	1.17005e-17	3.86392e-16
ENSG00000047936.11	ROS1	HERVW_1p33c	0.367759	1.19264e-17	3.90799e-16
ENSG00000163599.17	CTLA4	HML3_3q13.11b	0.369072	8.96218e-18	3.9877e-16
ENSG00000157764.14	BRAF	HML3_4q31.3	0.370681	6.3058e-18	4.36961e-16
ENSG00000198400.12	NTRK1	ERVLB4_7q36.1a	0.371138	5.70403e-18	5.35798e-16
ENSG00000198400.12	NTRK1	HERVL_1p22.2d	0.370945	5.95045e-18	5.46795e-16
ENSG00000047936.11	ROS1	HERVS71_3p12.3	0.365225	2.06173e-17	6.60223e-16
ENSG00000047936.11	ROS1	HML1_6q22.32	0.365231	2.05897e-17	6.60223e-16
ENSG00000198400.12	NTRK1	HARLEQUIN_1q32.1	0.365472	7.76692e-18	6.98527e-16
ENSG00000157764.14	BRAF	HERVH_1p34.3c	0.3684	1.03759e-17	7.07404e-16
ENSG00000047936.11	ROS1	HUERSP3_2p25.2	0.364742	2.28709e-17	7.21457e-16
ENSG00000188389.11	PDCD1	MER101_19q13.2c	0.367134	1.36544e-17	7.59435e-16
ENSG00000047936.11	ROS1	HML3_8p11.22	-0.364192	2.57322e-17	8.05705e-16
ENSG00000047936.11	ROS1	HERVH48_8q21.2	0.36391	2.73372e-17	8.49663e-16
ENSG00000047936.11	ROS1	ERVLE_11q23.3c	0.363534	2.96281e-17	9.14147e-16
ENSG00000198400.12	NTRK1	ERVLB4_17q25.1	0.367851	1.16886e-17	9.88155e-16
ENSG00000188389.11	PDCD1	HERVH_2p11.2c	0.364945	2.18967e-17	1.18663e-15
ENSG00000047936.11	ROS1	HERVW_3p24.3	0.361867	4.22712e-17	1.29479e-15
ENSG00000047936.11	ROS1	HML3_13q12.11b	0.361703	4.37675e-17	1.33097e-15
ENSG00000157764.14	BRAF	MER4_15q22.31b	0.364793	2.26228e-17	1.38589e-15
ENSG00000047936.11	ROS1	HERVH_3p22.3b	0.36125	4.81816e-17	1.45474e-15
ENSG00000047936.11	ROS1	MER41_1q44b	0.360697	5.41712e-17	1.62398e-15
ENSG00000047936.11	ROS1	HERVH_3p21.31a	0.360554	5.58399e-17	1.66222e-15
ENSG00000105976.16	MET	HERVL_9q22.32	-0.373095	3.70631e-18	1.95832e-15
ENSG00000047936.11	ROS1	PABLA_6q27a	0.359501	6.97362e-17	2.06136e-15
ENSG00000157764.14	BRAF	ERVLE_7q22.1c	0.362501	3.69322e-17	2.13853e-15
ENSG00000120217.14	CD274	ERVLE_2q24.2c	0.364753	2.28181e-17	2.4113e-15
ENSG00000047936.11	ROS1	HERVH_11q23.3b	0.358564	8.49497e-17	2.49363e-15
ENSG00000047936.11	ROS1	ERV316A3_6p21.33b	0.358467	8.6688e-17	2.5271e-15
ENSG00000157764.14	BRAF	ERV316A3_6p21.2a	0.361072	5.00367e-17	2.82007e-15
ENSG00000163599.17	CTLA4	HARLEQUIN_6q23.1	0.35949	6.99083e-17	2.95502e-15
ENSG00000120217.14	CD274	HERVH_1p31.3d	0.363391	3.05469e-17	3.07433e-15
ENSG00000047936.11	ROS1	ERVL_22q12.3b	0.357277	1.11244e-16	3.17723e-15
ENSG00000047936.11	ROS1	HERVH_6p21.2b	0.357034	1.17048e-16	3.32054e-15
ENSG00000163599.17	CTLA4	HML5_8p21.2	0.358859	7.9831e-17	3.34105e-15
ENSG00000163599.17	CTLA4	HERVP71A_12p13.33a	0.358739	8.18781e-17	3.39312e-15
ENSG00000198400.12	NTRK1	HERVH_8q22.1a	0.361731	4.3511e-17	3.50027e-15
ENSG00000157764.14	BRAF	ERV316A3_6p21.2b	0.359465	7.02771e-17	3.85794e-15
ENSG00000047936.11	ROS1	HERVL18_4q21.1	-0.355891	1.48558e-16	4.18638e-15
ENSG00000188389.11	PDCD1	HERVE_10p13c	0.358552	8.51534e-17	4.28504e-15
ENSG00000198400.12	NTRK1	ERV316A3_6p21.33b	0.359682	6.71354e-17	5.06752e-15
ENSG00000163599.17	CTLA4	ERVLE_5q22.2b	0.356657	1.26642e-16	5.09824e-15
ENSG00000146648.19	EGFR	HML1_10p15.1	-0.368952	9.19991e-18	5.55543e-15
ENSG00000047936.11	ROS1	HERVIP10F_8p11.22	-0.353989	2.20374e-16	6.12842e-15
ENSG00000120217.14	CD274	HERVP71A_12p13.33b	0.359837	6.49733e-17	6.38703e-15
ENSG00000047936.11	ROS1	HERVH_8q22.1a	0.353649	2.36412e-16	6.53146e-15
ENSG00000120217.14	CD274	HUERSP1_1p13.3	0.359552	6.89899e-17	6.62774e-15
ENSG00000157764.14	BRAF	ERVLE_14q21.3e	0.356378	1.34206e-16	6.91815e-15
ENSG00000163599.17	CTLA4	HUERSP3_2p25.2	0.354984	1.79371e-16	7.15286e-15
ENSG00000120217.14	CD274	HERV3_19q13.33	0.359009	7.73619e-17	7.26686e-15
ENSG00000157764.14	BRAF	HML3_1q21.3c	0.355652	1.56109e-16	7.85561e-15
ENSG00000157764.14	BRAF	MER34B_4q31.3	0.355709	1.54295e-16	7.85561e-15
ENSG00000188389.11	PDCD1	HML3_3q13.11b	0.355221	1.70737e-16	8.20121e-15
ENSG00000198400.12	NTRK1	ERVL_22q12.3b	0.357165	1.13894e-16	8.30055e-15
ENSG00000163599.17	CTLA4	HERV9_15q21.1a	0.354045	2.1787e-16	8.60687e-15
ENSG00000157764.14	BRAF	ERV316A3_21q22.3e	0.355046	1.77044e-16	8.80427e-15
ENSG00000163599.17	CTLA4	HERVS71_19p13.3	0.353719	2.33037e-16	9.03713e-15
ENSG00000198400.12	NTRK1	HERV9_7p14.2	0.356454	1.321e-16	9.46416e-15
ENSG00000157764.14	BRAF	HERVKC4_1q22	0.35449	1.98701e-16	9.76637e-15
ENSG00000047936.11	ROS1	HERVH_8p11.23	0.350699	4.33331e-16	1.14574e-14
ENSG00000047936.11	ROS1	MER101_1p31.3	0.350512	4.50221e-16	1.17474e-14
ENSG00000105976.16	MET	PABLA_7q32.1	0.364251	2.54111e-17	1.19347e-14
ENSG00000198400.12	NTRK1	HERVFH21_Xq11.2b	0.355007	1.78506e-16	1.23696e-14
ENSG00000120217.14	CD274	HERVEA_6q22.31	0.35632	1.35865e-16	1.24849e-14
ENSG00000047936.11	ROS1	HERVE_17q11.2	0.35085	4.85471e-16	1.25895e-14
ENSG00000105976.16	MET	HERVL_2q37.1	-0.363491	2.99007e-17	1.2639e-14
ENSG00000105976.16	MET	HERVH_3q26.1b	-0.362786	3.47568e-17	1.33561e-14
ENSG00000047936.11	ROS1	HERVL40_7q21.12b	0.350446	5.31766e-16	1.37059e-14
ENSG00000047936.11	ROS1	HERVP71A_12p13.33b	0.34961	5.41063e-16	1.3861e-14
ENSG00000188389.11	PDCD1	MER34B_19p13.11	0.352155	3.21571e-16	1.49372e-14
ENSG00000047936.11	ROS1	HML3_8q13.2	0.349157	5.93347e-16	1.51089e-14
ENSG00000157764.14	BRAF	ERVLE_16p12.1b	0.351833	3.43585e-16	1.63184e-14
ENSG00000188389.11	PDCD1	HUERSP1_9q22.33	0.351217	3.89792e-16	1.79093e-14
ENSG00000157764.14	BRAF	HERVL40_22q13.2	0.350795	4.24897e-16	1.97367e-14
ENSG00000188389.11	PDCD1	HERVEA_19p13.3	0.350583	4.43752e-16	1.99547e-14
ENSG00000188389.11	PDCD1	HERVS71_19p13.3	0.350623	4.40141e-16	1.99547e-14
ENSG00000157764.14	BRAF	ERV316A3_7q31.1c	-0.351125	4.56146e-16	2.09579e-14
ENSG00000047936.11	ROS1	HERVH_11q23.3c	0.34729	8.65848e-16	2.14032e-14
ENSG00000047936.11	ROS1	HERVL74_19p13.2b	0.346863	9.43868e-16	2.31961e-14
ENSG00000163599.17	CTLA4	HERVH_4q13.3	0.34888	6.27583e-16	2.3476e-14
ENSG00000198400.12	NTRK1	MER41_1q44a	0.35145	3.71644e-16	2.49356e-14
ENSG00000198400.12	NTRK1	HERVFH21_Xq11.2a	0.351363	3.78271e-16	2.49836e-14
ENSG00000188389.11	PDCD1	MER4B_12p13.31c	0.350084	5.76727e-16	2.51322e-14
ENSG00000157764.14	BRAF	ERVLE_8q22.3b	0.349052	6.06092e-16	2.69679e-14
ENSG00000157764.14	BRAF	HML6_19p13.2d	0.348944	6.19512e-16	2.71176e-14
ENSG00000157764.14	BRAF	HERVH_7q21.2	0.348731	6.4694e-16	2.79042e-14
ENSG00000047936.11	ROS1	HERVH_3q28a	0.345749	1.18083e-15	2.88519e-14
ENSG00000188389.11	PDCD1	ERVL_22q12.3b	0.348342	6.99928e-16	3.01898e-14
ENSG00000157764.14	BRAF	HERVH_6q11.1a	0.347987	7.52108e-16	3.21127e-14
ENSG00000188389.11	PDCD1	ERV316A3_3q27.3e	0.347511	8.28099e-16	3.53573e-14
ENSG00000047936.11	ROS1	ERVLB4_17q25.1	0.344334	1.56735e-15	3.76431e-14
ENSG00000163599.17	CTLA4	ERVLE_3p21.31d	0.346284	1.06047e-15	3.86431e-14
ENSG00000171094.18	ALK	MER4_5p13.2b	0.368774	9.5636e-18	4.04253e-14
ENSG00000157764.14	BRAF	HML2_1q21.3	0.347675	9.80188e-16	4.06202e-14
ENSG00000163599.17	CTLA4	ERVLB4_9q31.3	0.34599	1.12497e-15	4.06431e-14
ENSG00000047936.11	ROS1	HML5_11q12.2	0.343636	1.80166e-15	4.27845e-14
ENSG00000047936.11	ROS1	ERVLE_4q21.1b	0.343576	1.82315e-15	4.30528e-14
ENSG00000047936.11	ROS1	HERVEA_19q13.33	0.343042	2.02769e-15	4.76169e-14
ENSG00000163599.17	CTLA4	LTR23_9q22.33b	0.345076	1.35126e-15	4.8405e-14
ENSG00000120217.14	CD274	HERVH_9q34.13	-0.349295	5.76832e-16	4.97606e-14
ENSG00000047936.11	ROS1	HERVP71A_6p21.1a	0.342702	2.16927e-15	5.06602e-14
ENSG00000120217.14	CD274	HERVI_9q22.1	-0.347818	7.78349e-16	6.45114e-14
ENSG00000120217.14	CD274	HUERSP2_19q13.2	0.348784	7.69343e-16	6.45114e-14
ENSG00000146648.19	EGFR	HML3_4q31.3	0.355716	1.54042e-16	6.51135e-14
ENSG00000105976.16	MET	HERVL_14q22.3b	-0.353884	2.25204e-16	7.32259e-14
ENSG00000163599.17	CTLA4	HERVL18_11q14.2b	0.342893	2.08862e-15	7.419e-14
ENSG00000198400.12	NTRK1	ERV316A3_3q27.3e	0.345757	1.17901e-15	7.55099e-14
ENSG00000198400.12	NTRK1	HERVE_10p13c	0.345429	1.2592e-15	7.82742e-14
ENSG00000198400.12	NTRK1	LTR23_9q22.33b	0.345043	1.36033e-15	8.33349e-14
ENSG00000157764.14	BRAF	ERVLE_7q21.2	0.343028	2.03329e-15	8.34437e-14
ENSG00000198400.12	NTRK1	MER4B_1p36.33	0.344544	1.50319e-15	9.07713e-14
ENSG00000120217.14	CD274	HERVL40_4q31.3b	0.345899	1.14587e-15	9.13886e-14
ENSG00000047936.11	ROS1	HERVE_3p26.3	0.339532	4.05581e-15	9.26699e-14
ENSG00000157764.14	BRAF	ERV316A3_5p13.3e	0.342289	2.35483e-15	9.47986e-14
ENSG00000141736.14	ERBB2	ERVLB4_2q14.2b	0.364583	2.36658e-17	1.00035e-13
ENSG00000047936.11	ROS1	HERVH_3q26.1a	-0.338966	4.53198e-15	1.02993e-13
ENSG00000198400.12	NTRK1	LTR23_9q22.33a	0.343572	1.8249e-15	1.07624e-13
ENSG00000047936.11	ROS1	ERV316A3_9q34.2a	0.3386	4.86842e-15	1.10047e-13
ENSG00000047936.11	ROS1	LTR23_9q22.33a	0.338348	5.11419e-15	1.14379e-13
ENSG00000163599.17	CTLA4	HERVEA_19p13.3	0.340576	3.30332e-15	1.15398e-13
ENSG00000047936.11	ROS1	ERVLB4_17q21.32	0.339685	5.19511e-15	1.15578e-13
ENSG00000047936.11	ROS1	HERVH_3q26.1b	-0.338159	5.3068e-15	1.17444e-13
ENSG00000047936.11	ROS1	HERVFRD_21q22.3	0.337652	5.85897e-15	1.28989e-13
ENSG00000047936.11	ROS1	HERVEA_15q21.3	0.337351	6.21306e-15	1.35374e-13
ENSG00000047936.11	ROS1	MER61_6q14.1f	0.337245	6.34267e-15	1.3749e-13
ENSG00000165731.20	RET	HERVL18_1q32.2	0.35452	1.97452e-16	1.39105e-13
ENSG00000188389.11	PDCD1	HML3_8q24.13	0.340104	3.62523e-15	1.48775e-13
ENSG00000198400.12	NTRK1	HERVFRD_6p24.2	0.341277	2.87659e-15	1.5864e-13
ENSG00000047936.11	ROS1	MER41_6q14.1e	0.33552	8.8631e-15	1.90174e-13
ENSG00000157764.14	BRAF	HERVL40_4q31.3b	0.338441	5.0221e-15	1.91247e-13
ENSG00000163599.17	CTLA4	MER61_2q31.1b	0.337894	5.58898e-15	1.9207e-13
ENSG00000105976.16	MET	ERVLE_2q24.2c	0.348722	6.48027e-16	1.95658e-13
ENSG00000146648.19	EGFR	ERVLE_3q26.1a	-0.348853	6.31062e-16	2.05192e-13
ENSG00000047936.11	ROS1	HERV9_4p14	0.335053	9.70068e-15	2.07095e-13
ENSG00000120217.14	CD274	ERV316A3_6p22.1i	0.340908	3.09397e-15	2.30411e-13
ENSG00000120217.14	CD274	HML1_15q21.2	-0.340887	3.10704e-15	2.30411e-13
ENSG00000165731.20	RET	HERVL_9q22.32	0.351211	3.90276e-16	2.35671e-13
ENSG00000157764.14	BRAF	HUERSP1_7q21.12	0.336343	7.55704e-15	2.82687e-13
ENSG00000047936.11	ROS1	HML6_19p13.2d	0.33332	1.35413e-14	2.82934e-13
ENSG00000047936.11	ROS1	LTR23_9q22.33b	0.333303	1.35878e-14	2.82934e-13
ENSG00000157764.14	BRAF	HERVH48_8q21.2	0.336	8.07641e-15	2.91786e-13
ENSG00000047936.11	ROS1	HERV3_19q13.33	0.333084	1.41704e-14	2.92187e-13
ENSG00000047936.11	ROS1	HUERSP1_7q21.12	0.333024	1.43327e-14	2.941e-13
ENSG00000146648.19	EGFR	ERV316A3_4q31.23c	0.346277	1.06185e-15	2.99231e-13
ENSG00000157764.14	BRAF	HML1_6q22.32	0.335046	9.71481e-15	3.4508e-13
ENSG00000163599.17	CTLA4	MER4_2p21	0.334569	1.06503e-14	3.5448e-13
ENSG00000120217.14	CD274	HERVH_8q24.21b	-0.33791	5.57132e-15	3.86065e-13
ENSG00000120217.14	CD274	HERVL40_9p24.1a	0.337548	5.97838e-15	4.0759e-13
ENSG00000047936.11	ROS1	ERVLE_5q31.1d	0.331056	2.08749e-14	4.22171e-13
ENSG00000047936.11	ROS1	HARLEQUIN_6p21.33	0.330784	2.19826e-14	4.40382e-13
ENSG00000047936.11	ROS1	HERVH_7q11.23a	0.330494	2.32254e-14	4.63085e-13
ENSG00000047936.11	ROS1	MER41_9q31.1c	0.330399	2.36486e-14	4.69308e-13
ENSG00000047936.11	ROS1	HUERSP3_1q23.3	0.330066	2.51914e-14	4.95274e-13
ENSG00000188389.11	PDCD1	MER41_6p21.32	0.333749	1.24706e-14	4.97293e-13
ENSG00000047936.11	ROS1	MER61_13q14.2	0.330003	2.54956e-14	4.98935e-13
ENSG00000047936.11	ROS1	HERVE_11q13.4c	0.329696	2.70219e-14	5.26367e-13
ENSG00000188389.11	PDCD1	HERVW_5p14.3	0.333229	1.37806e-14	5.44398e-13
ENSG00000163599.17	CTLA4	ERVLB4_17q25.1	0.331904	1.77566e-14	5.72955e-13
ENSG00000146648.19	EGFR	MER34B_4q31.3	0.341934	2.52599e-15	5.93186e-13
ENSG00000047936.11	ROS1	HERVIP10FH_2q14.2	0.329012	3.07524e-14	5.93564e-13
ENSG00000198400.12	NTRK1	HUERSP3_2p25.2	0.334068	1.17303e-14	5.97398e-13
ENSG00000047936.11	ROS1	HERVH_13q13.3a	0.328883	3.15126e-14	6.05471e-13
ENSG00000120217.14	CD274	HERVL_2q37.1	-0.335132	9.55372e-15	6.11873e-13
ENSG00000105976.16	MET	HERVL18_1q32.2	-0.342137	2.42644e-15	6.41036e-13
ENSG00000157764.14	BRAF	ERVLB4_16p13.3a	-0.332983	1.94812e-14	6.43335e-13
ENSG00000047936.11	ROS1	ERVLE_2q12.3e	0.328324	3.50151e-14	6.63717e-13
ENSG00000120217.14	CD274	ERVL_22q12.3b	0.334528	1.07358e-14	6.76481e-13
ENSG00000120217.14	CD274	HERVH_12q13.2b	0.334431	1.09376e-14	6.76481e-13
ENSG00000163599.17	CTLA4	HERVW_5p14.3	0.33083	2.17901e-14	6.97777e-13
ENSG00000047936.11	ROS1	HERVH_11q13.2b	0.328011	3.71382e-14	7.00817e-13
ENSG00000047936.11	ROS1	ERV316A3_8q23.1c	0.327841	3.83476e-14	7.17236e-13
ENSG00000047936.11	ROS1	HERVI_16p13.13	0.327311	4.23617e-14	7.85363e-13
ENSG00000047936.11	ROS1	HERVH_6q23.2a	0.327059	4.44179e-14	8.16324e-13
ENSG00000120217.14	CD274	HERVH_3q26.1b	-0.332945	1.45519e-14	8.78724e-13
ENSG00000047936.11	ROS1	HERVS71_18q21.1	-0.326514	4.91937e-14	8.8864e-13
ENSG00000171094.18	ALK	HERVP71A_12p13.33b	0.350818	4.22959e-16	8.93923e-13
ENSG00000163599.17	CTLA4	HERVL40_9p24.1a	0.329414	2.85042e-14	9.05918e-13
ENSG00000047936.11	ROS1	HERVH_1q42.13c	0.326364	5.05912e-14	9.09995e-13
ENSG00000146648.19	EGFR	HERVIP10F_19q13.41a	0.3407	4.22995e-15	9.41053e-13
ENSG00000157764.14	BRAF	HML2_9q34.11	0.329202	2.96695e-14	9.42956e-13
ENSG00000163599.17	CTLA4	HERV4_8q24.3	0.329108	3.0198e-14	9.5259e-13
ENSG00000047936.11	ROS1	HERVK11_1p13.3	0.325926	5.49022e-14	9.83355e-13
ENSG00000120217.14	CD274	HERVH_9p13.3c	-0.331739	1.83275e-14	1.09113e-12
ENSG00000198400.12	NTRK1	HML2_10p14	0.33054	2.30246e-14	1.13168e-12
ENSG00000146648.19	EGFR	PABLB_10p15.1b	-0.337901	5.58067e-15	1.17948e-12
ENSG00000157764.14	BRAF	HERVI_16p13.13	0.327769	3.88702e-14	1.21707e-12
ENSG00000047936.11	ROS1	HERVIP10F_16p13.13	0.324474	7.19616e-14	1.25178e-12
ENSG00000047936.11	ROS1	MER41_4p16.1b	0.325924	7.41819e-14	1.28511e-12
ENSG00000047936.11	ROS1	HERVH_6p22.3d	0.324006	7.84891e-14	1.35418e-12
ENSG00000198400.12	NTRK1	ERVLE_1p13.3b	0.329397	2.85937e-14	1.38926e-12
ENSG00000047936.11	ROS1	HERVH_12p13.32	0.32356	8.5248e-14	1.46481e-12
ENSG00000047936.11	ROS1	HERVL_2q37.1	-0.323476	8.65751e-14	1.47562e-12
ENSG00000047936.11	ROS1	HERVW_6p25.3	0.323484	8.64599e-14	1.47562e-12
ENSG00000047936.11	ROS1	ERVLE_Xq22.1a	0.323382	8.81054e-14	1.49567e-12
ENSG00000157764.14	BRAF	HERVH_19q13.41a	0.328172	4.87159e-14	1.50308e-12
ENSG00000120217.14	CD274	HERVW_5p14.3	0.329939	2.58067e-14	1.51507e-12
ENSG00000146648.19	EGFR	HERVL_9q22.32	-0.335838	8.33415e-15	1.6315e-12
ENSG00000146648.19	EGFR	HML4_10p15.1	-0.335742	8.49136e-15	1.6315e-12
ENSG00000047936.11	ROS1	ERVLE_1p22.3a	0.322832	9.75246e-14	1.64895e-12
ENSG00000105976.16	MET	ERV316A3_2q32.2c	0.336385	7.49544e-15	1.76018e-12
ENSG00000198400.12	NTRK1	HERVE_2p14a	0.327996	3.72495e-14	1.76914e-12
ENSG00000157764.14	BRAF	MER4_15q22.31a	0.325521	5.92188e-14	1.8139e-12
ENSG00000133703.13	KRAS	MER101_7q36.1a	0.346237	1.33592e-15	1.88231e-12
ENSG00000157764.14	BRAF	MER61_13q14.2	0.325088	6.41908e-14	1.92436e-12
ENSG00000047936.11	ROS1	ERVLB4_7q36.1a	0.321931	1.15151e-13	1.93922e-12
ENSG00000188389.11	PDCD1	HERV4_8q24.3	0.325978	5.43738e-14	2.06084e-12
ENSG00000188389.11	PDCD1	HERVP71A_12p13.33a	0.325955	5.46046e-14	2.06084e-12
ENSG00000157764.14	BRAF	MER41_15q22.31b	0.32467	6.93797e-14	2.06527e-12
ENSG00000163599.17	CTLA4	HML2_1q22	0.326272	6.95223e-14	2.1295e-12
ENSG00000146648.19	EGFR	LTR25_1q22	0.334061	1.17441e-14	2.15837e-12
ENSG00000163599.17	CTLA4	HML2_10p14	0.324381	7.3213e-14	2.22641e-12
ENSG00000120217.14	CD274	ERVLE_3q26.1a	-0.327778	3.88063e-14	2.24705e-12
ENSG00000198400.12	NTRK1	HML6_19p13.2d	0.326559	4.87732e-14	2.26554e-12
ENSG00000198400.12	NTRK1	HERVH_2q33.2	0.326087	5.32831e-14	2.39604e-12
ENSG00000198400.12	NTRK1	MER4B_12p13.31c	0.327708	5.31507e-14	2.39604e-12
ENSG00000157764.14	BRAF	HERVE_11q13.4e	0.323603	8.45736e-14	2.46547e-12
ENSG00000105976.16	MET	HML2_17p13.1	-0.333747	1.2477e-14	2.51145e-12
ENSG00000047936.11	ROS1	HERVL_12p13.1c	0.321684	1.61897e-13	2.64223e-12
ENSG00000047936.11	ROS1	HML5_7p14.1	0.31971	1.72974e-13	2.80138e-12
ENSG00000157764.14	BRAF	ERVLB4_19q13.12	0.324486	9.6824e-14	2.80326e-12
ENSG00000105976.16	MET	HERV9_Xq23b	0.332916	1.46342e-14	2.81176e-12
ENSG00000047936.11	ROS1	MER61_10q26.12	0.319646	1.7502e-13	2.8237e-12
ENSG00000157764.14	BRAF	MER101_15q15.2	0.322266	1.08254e-13	3.07108e-12
ENSG00000133703.13	KRAS	HERVH_1p31.1a	-0.34239	2.99295e-15	3.16279e-12
ENSG00000157764.14	BRAF	HML2_7q34	0.321562	1.23236e-13	3.4271e-12
ENSG00000047936.11	ROS1	HERVW_Xq22.3c	0.318526	2.14598e-13	3.43601e-12
ENSG00000047936.11	ROS1	ERV316A3_8q13.3a	-0.320086	2.16399e-13	3.45177e-12
ENSG00000047936.11	ROS1	ERV316A3_4q31.1b	0.318316	2.22935e-13	3.54266e-12
ENSG00000120217.14	CD274	MER34B_4q31.3	0.325108	6.39585e-14	3.6047e-12
ENSG00000047936.11	ROS1	MER4B_12q22	0.317183	2.73764e-13	4.30186e-12
ENSG00000198400.12	NTRK1	HERVP71A_12p13.33a	0.322404	1.05533e-13	4.41671e-12
ENSG00000120217.14	CD274	LTR23_9q22.33b	0.323519	8.58947e-14	4.71529e-12
ENSG00000198400.12	NTRK1	HERVH_22q13.1b	0.321936	1.15034e-13	4.72088e-12
ENSG00000157764.14	BRAF	LTR25_7q21.12	0.319338	1.85132e-13	4.98441e-12
ENSG00000146648.19	EGFR	HERV3_7q34c	0.32898	3.0937e-14	5.23083e-12
ENSG00000047936.11	ROS1	ERV316A3_6p22.1i	0.315742	3.54957e-13	5.45601e-12
ENSG00000188389.11	PDCD1	MER61_2q31.1b	0.320059	1.62314e-13	5.96611e-12
ENSG00000163599.17	CTLA4	HERVP71A_12p13.33b	0.318813	2.03687e-13	6.06326e-12
ENSG00000047936.11	ROS1	HERVL_8q24.3a	0.31504	4.02641e-13	6.14427e-12
ENSG00000047936.11	ROS1	MER4B_1p36.33	0.314776	4.22173e-13	6.41915e-12
ENSG00000120217.14	CD274	HARLEQUIN_1q32.1	0.322831	1.31276e-13	7.05819e-12
ENSG00000120217.14	CD274	HERVIP10FH_2q14.2	0.321191	1.31913e-13	7.05819e-12
ENSG00000171094.18	ALK	ERVLB4_17q25.1	0.336634	7.14237e-15	7.5477e-12
ENSG00000146648.19	EGFR	HML2_17p13.1	-0.326755	4.70163e-14	7.64377e-12
ENSG00000047936.11	ROS1	ERVLE_1q23.2b	0.315195	5.19361e-13	7.8405e-12
ENSG00000047936.11	ROS1	HERVP71A_12p13.33a	0.312942	5.85678e-13	8.81017e-12
ENSG00000188389.11	PDCD1	HERVH_4q13.3	0.317613	2.53257e-13	9.2286e-12
ENSG00000047936.11	ROS1	ERVLE_1p13.3b	0.3126	6.22384e-13	9.29617e-12
ENSG00000198400.12	NTRK1	ERVLE_13q12.11	0.31808	2.32714e-13	9.36842e-12
ENSG00000146648.19	EGFR	ERVLB4_Xq21.33a	-0.325439	6.01291e-14	9.41354e-12
ENSG00000047936.11	ROS1	ERVLE_1p35.2b	0.312502	6.3338e-13	9.4271e-12
ENSG00000120217.14	CD274	HERVL66_1q42.12	-0.319391	1.8335e-13	9.45149e-12
ENSG00000047936.11	ROS1	MER101_1p35.2	0.312414	6.43373e-13	9.54224e-12
ENSG00000198400.12	NTRK1	HUERSP1_9q22.33	0.317804	2.44636e-13	9.75542e-12
ENSG00000047936.11	ROS1	ERV316A3_3q13.13b	0.312177	6.70959e-13	9.91658e-12
ENSG00000198400.12	NTRK1	HERVFRD_21q22.3	0.317654	2.51401e-13	9.93151e-12
ENSG00000047936.11	ROS1	LTR19_4q35.1	0.311932	7.00721e-13	1.02136e-11
ENSG00000163599.17	CTLA4	LTR23_9q22.33a	0.315705	3.57335e-13	1.04169e-11
ENSG00000120217.14	CD274	HML1_2p11.2	-0.318773	2.05193e-13	1.045e-11
ENSG00000047936.11	ROS1	HERVH_4p16.1b	0.311637	7.38336e-13	1.06882e-11
ENSG00000157764.14	BRAF	HERVL_5p13.3b	0.314602	4.35489e-13	1.09572e-11
ENSG00000120217.14	CD274	HUERSP3B_7p21.3	0.318337	2.22086e-13	1.10906e-11
ENSG00000157764.14	BRAF	PABLA_19p12a	0.314487	4.44545e-13	1.11189e-11
ENSG00000105976.16	MET	HERVI_9q22.1	-0.324523	7.13064e-14	1.11634e-11
ENSG00000157764.14	BRAF	HERVL_6q11.1b	0.314303	4.59455e-13	1.13574e-11
ENSG00000047936.11	ROS1	ERV316A3_3p21.31c	0.311274	7.87344e-13	1.13587e-11
ENSG00000157764.14	BRAF	HERVEA_19q13.33	0.314035	4.82036e-13	1.17778e-11
ENSG00000157764.14	BRAF	HERVE_11q13.4d	0.313914	4.92505e-13	1.19293e-11
ENSG00000146648.19	EGFR	HERVI_9q22.1	-0.323901	8.0025e-14	1.20809e-11
ENSG00000047936.11	ROS1	HERVS71_19p13.3	0.31074	8.65241e-13	1.23979e-11
ENSG00000146648.19	EGFR	HERVH_6p21.2b	0.323471	8.66572e-14	1.2631e-11
ENSG00000120217.14	CD274	HERV9_Xq23b	0.317447	2.61001e-13	1.2681e-11
ENSG00000120217.14	CD274	ERVLB4_7q36.1a	0.317104	2.77675e-13	1.33379e-11
ENSG00000047936.11	ROS1	HERVH_7q21.3b	-0.310184	9.54251e-13	1.35356e-11
ENSG00000157764.14	BRAF	HML2_14q11.2	0.313097	5.69779e-13	1.36844e-11
ENSG00000157764.14	BRAF	LTR19_4q35.1	0.312731	6.08131e-13	1.44414e-11
ENSG00000047936.11	ROS1	HUERSP2_19q13.2	0.310549	1.17302e-12	1.64613e-11
ENSG00000157764.14	BRAF	HERVL_2p11.2b	0.311859	7.09929e-13	1.64883e-11
ENSG00000163599.17	CTLA4	MER101_1p22.2b	0.312937	5.86266e-13	1.68581e-11
ENSG00000188389.11	PDCD1	ERVLB4_17q25.1	0.314211	4.67039e-13	1.68733e-11
ENSG00000105976.16	MET	HML1_10p15.1	-0.322053	1.12581e-13	1.69956e-11
ENSG00000120217.14	CD274	HERVIP10F_19q13.41a	0.317077	3.71639e-13	1.74547e-11
ENSG00000047936.11	ROS1	HERVH_3q26.1i	0.308534	1.27479e-12	1.77255e-11
ENSG00000157764.14	BRAF	HUERSP3B_1q24.2	0.311313	7.81922e-13	1.80611e-11
ENSG00000047936.11	ROS1	MER41_Xq13.3b	0.308162	1.3606e-12	1.88566e-11
ENSG00000047936.11	ROS1	ERVLE_3q26.1a	-0.307941	1.41413e-12	1.95345e-11
ENSG00000198400.12	NTRK1	MER4_2p21	0.313551	5.25535e-13	1.96587e-11
ENSG00000105976.16	MET	HERVH_9q34.13	-0.320767	1.42577e-13	1.98075e-11
ENSG00000146648.19	EGFR	HML2_1q22	0.322024	1.52164e-13	2.07483e-11
ENSG00000120217.14	CD274	HERV9_7p14.2	0.31431	4.58903e-13	2.13163e-11
ENSG00000047936.11	ROS1	MER4_5p12b	0.307329	1.57351e-12	2.15948e-11
ENSG00000163599.17	CTLA4	HERVW_12p13.1	0.311424	7.66725e-13	2.16063e-11
ENSG00000047936.11	ROS1	HERV9_Xq23b	0.307137	1.62683e-12	2.22544e-11
ENSG00000198400.12	NTRK1	HERV3_19q13.33	0.312712	6.1018e-13	2.24281e-11
ENSG00000163599.17	CTLA4	ERV316A3_12q24.13	0.311146	8.05421e-13	2.25464e-11
ENSG00000198400.12	NTRK1	HERVS71_19p13.3	0.312149	6.74289e-13	2.45708e-11
ENSG00000157764.14	BRAF	HERVH_13q14.2a	0.309382	1.09886e-12	2.4576e-11
ENSG00000047936.11	ROS1	HERVW_1p33b	0.306237	1.90215e-12	2.58533e-11
ENSG00000146648.19	EGFR	HERVL_Xq21.33b	-0.319015	1.96359e-13	2.59378e-11
ENSG00000141736.14	ERBB2	HERVFRD_7q21.3	0.332456	1.59816e-14	2.6762e-11
ENSG00000157764.14	BRAF	HERVIP10F_16p13.13	0.308644	1.2506e-12	2.73901e-11
ENSG00000047936.11	ROS1	MER4_8q24.3c	0.305657	2.10333e-12	2.83146e-11
ENSG00000163599.17	CTLA4	HML3_Xq21.1a	0.309641	1.04987e-12	2.90052e-11
ENSG00000146648.19	EGFR	HERVH_8q24.21b	-0.31822	2.26878e-13	2.9061e-11
ENSG00000188389.11	PDCD1	HUERSP1_1p13.3	0.310933	8.36228e-13	2.97037e-11
ENSG00000157764.14	BRAF	PRIMA41_10p15.3	0.30775	1.46194e-12	3.12103e-11
ENSG00000157764.14	BRAF	HARLEQUIN_2q12.3	0.307719	1.46985e-12	3.12214e-11
ENSG00000120217.14	CD274	HML6_4q21.1	0.311966	6.9651e-13	3.13207e-11
ENSG00000171094.18	ALK	HML3_16p13.3	0.327933	3.76907e-14	3.18637e-11
ENSG00000157764.14	BRAF	MER41_6p23	-0.30742	1.54861e-12	3.27298e-11
ENSG00000047936.11	ROS1	MER4_5p13.2b	0.304028	2.78616e-12	3.70348e-11
ENSG00000120217.14	CD274	ERVLE_1p13.3b	0.310593	8.88005e-13	3.79151e-11
ENSG00000157764.14	BRAF	HERVL40_7q21.12b	0.307601	1.95126e-12	4.04314e-11
ENSG00000157764.14	BRAF	HERVH_7q11.23a	0.305862	2.03007e-12	4.1859e-11
ENSG00000120217.14	CD274	ERV316A3_2q32.2c	0.309766	1.02717e-12	4.29887e-11
ENSG00000146648.19	EGFR	ERVLB4_Xq21.33b	-0.315659	3.60326e-13	4.35171e-11
ENSG00000146648.19	EGFR	HERVH_7p21.1a	0.315451	3.73985e-13	4.3912e-11
ENSG00000105976.16	MET	HUERSP3B_Xq21.33	-0.315887	3.45837e-13	4.42986e-11
ENSG00000105976.16	MET	HERVH_6q12c	-0.315701	3.57612e-13	4.44595e-11
ENSG00000198400.12	NTRK1	ERVLB4_1p36.11	0.308562	1.26861e-12	4.50624e-11
ENSG00000047936.11	ROS1	HERVH_2q33.2	0.302562	3.5824e-12	4.70273e-11
ENSG00000047936.11	ROS1	MER61_18q12.3a	-0.302417	3.67208e-12	4.7907e-11
ENSG00000047936.11	ROS1	HERVH_13q31.1a	0.302345	3.71798e-12	4.82082e-11
ENSG00000157764.14	BRAF	ERV316A3_2q35f	0.304933	2.38362e-12	4.84402e-11
ENSG00000198400.12	NTRK1	MER101_1p22.2a	0.307767	1.45773e-12	5.09243e-11
ENSG00000105976.16	MET	HERVE_1p36.12	0.314532	4.41052e-13	5.32665e-11
ENSG00000047936.11	ROS1	HERVH_5p15.33	0.301483	4.30702e-12	5.5413e-11
ENSG00000198400.12	NTRK1	PABLB_1q31.3a	0.306983	1.67095e-12	5.78942e-11
ENSG00000047936.11	ROS1	HERVH_3q26.32c	0.301126	4.57657e-12	5.84446e-11
ENSG00000188389.11	PDCD1	HERVL_5q12.3	0.306994	1.66774e-12	5.8746e-11
ENSG00000157764.14	BRAF	HML3_8q11.23c	0.30302	3.3125e-12	6.51254e-11
ENSG00000188389.11	PDCD1	HERVW_12p13.1	0.306316	1.87636e-12	6.55484e-11
ENSG00000157764.14	BRAF	HERVH_11p15.4b	0.302909	3.3759e-12	6.60644e-11
ENSG00000198400.12	NTRK1	HERVH_3q26.1a	-0.306164	1.92653e-12	6.62068e-11
ENSG00000157764.14	BRAF	ERV316A3_21q22.3d	0.302474	3.63682e-12	7.07903e-11
ENSG00000047936.11	ROS1	HERVH_9q21.33c	0.299611	5.91752e-12	7.48903e-11
ENSG00000198400.12	NTRK1	HML1_15q21.2	-0.305116	2.30958e-12	7.87305e-11
ENSG00000146648.19	EGFR	HUERSP3B_7p21.3	0.311636	7.38525e-13	8.00448e-11
ENSG00000047936.11	ROS1	MER41_1p34.3	0.299178	6.36652e-12	8.03322e-11
ENSG00000188389.11	PDCD1	HERVL40_4q31.3b	0.304711	2.47678e-12	8.51168e-11
ENSG00000157764.14	BRAF	HML3_13q12.11b	0.301192	4.52526e-12	8.57771e-11
ENSG00000047936.11	ROS1	HUERSP3B_3q28a	0.298626	6.98724e-12	8.76412e-11
ENSG00000105976.16	MET	ERVLB4_Xq21.33b	-0.310666	8.76569e-13	9.57692e-11
ENSG00000105976.16	MET	ERVLB4_Xq21.33c	-0.310621	8.83605e-13	9.57692e-11
ENSG00000120217.14	CD274	MER101_1q42.13a	0.3049	2.39734e-12	9.7438e-11
ENSG00000047936.11	ROS1	HERVIP10F_1p35.2b	-0.297918	7.87121e-12	9.78576e-11
ENSG00000163599.17	CTLA4	ERV316A3_3q27.3e	0.302273	3.76351e-12	1.00036e-10
ENSG00000163599.17	CTLA4	HERV4_4q12	0.303706	3.78656e-12	1.00036e-10
ENSG00000188389.11	PDCD1	MER101_1p22.2a	0.303635	2.98067e-12	1.01607e-10
ENSG00000047936.11	ROS1	HERVS71_4p16.1b	0.297612	8.28653e-12	1.02719e-10
ENSG00000047936.11	ROS1	MER4B_3q26.31	0.297477	8.47628e-12	1.04764e-10
ENSG00000188389.11	PDCD1	HERVFRD_3p21.31	0.303403	3.10149e-12	1.0488e-10
ENSG00000105976.16	MET	MER101_12p13.31b	0.311132	1.05989e-12	1.09272e-10
ENSG00000141736.14	ERBB2	ERV316A3_8q24.12b	0.32249	1.03886e-13	1.09782e-10
ENSG00000105976.16	MET	MER4_Xq21.33c	-0.309327	1.10953e-12	1.11666e-10
ENSG00000157764.14	BRAF	MER34B_7q11.23a	0.299202	6.34025e-12	1.17032e-10
ENSG00000047936.11	ROS1	HML2_6q25.1	0.296726	9.6113e-12	1.17419e-10
ENSG00000047936.11	ROS1	HERVIP10F_3p25.3	0.296564	9.87636e-12	1.19964e-10
ENSG00000171094.18	ALK	HERVH_8q24.23c	0.319663	1.74475e-13	1.22918e-10
ENSG00000198400.12	NTRK1	HERVP71A_12p13.33b	0.302119	3.86415e-12	1.28612e-10
ENSG00000198400.12	NTRK1	HERVH_8q24.23c	0.301841	4.05196e-12	1.3381e-10
ENSG00000047936.11	ROS1	ERVLE_16p11.2b	0.295864	1.11001e-11	1.34442e-10
ENSG00000198400.12	NTRK1	HERVH_19q13.41a	0.303066	4.21851e-12	1.3823e-10
ENSG00000198400.12	NTRK1	HERVL_12p13.1c	0.302844	4.37909e-12	1.41301e-10
ENSG00000157764.14	BRAF	MER4_8q24.3c	0.297975	7.79614e-12	1.41435e-10
ENSG00000120217.14	CD274	HERVL_5q12.3	0.302321	3.73282e-12	1.43442e-10
ENSG00000105976.16	MET	MER34B_11p15.5	-0.307617	1.49628e-12	1.43745e-10
ENSG00000163599.17	CTLA4	MER34B_4q31.3	0.299911	5.62444e-12	1.45856e-10
ENSG00000047936.11	ROS1	HML2_7q11.21	0.295217	1.23612e-11	1.48862e-10
ENSG00000163599.17	CTLA4	MER61_5q23.2b	0.299689	5.83947e-12	1.50509e-10
ENSG00000047936.11	ROS1	HERVH_4p16.1d	0.295069	1.26698e-11	1.52146e-10
ENSG00000047936.11	ROS1	HUERSP1_11p15.4b	0.295052	1.2706e-11	1.52148e-10
ENSG00000198400.12	NTRK1	ERV316A3_20q13.33b	0.302347	4.7613e-12	1.5247e-10
ENSG00000047936.11	ROS1	HML3_16p13.13	0.295015	1.27836e-11	1.52644e-10
ENSG00000120217.14	CD274	HERVH48_7q22.1	0.301859	4.0394e-12	1.53825e-10
ENSG00000146648.19	EGFR	HUERSP3_1q23.3	0.307594	1.50239e-12	1.54892e-10
ENSG00000157764.14	BRAF	MER41_1p34.3	0.29729	8.74579e-12	1.5533e-10
ENSG00000157764.14	BRAF	MER41_9q22.31	0.297058	9.09247e-12	1.60811e-10
ENSG00000163599.17	CTLA4	MER101_1p22.2a	0.299016	6.5433e-12	1.67627e-10
ENSG00000157764.14	BRAF	MER41_7q11.23	0.296643	9.74562e-12	1.69526e-10
ENSG00000047936.11	ROS1	HERVK11_8p23.1c	0.294186	1.46672e-11	1.74643e-10
ENSG00000141736.14	ERBB2	HERVE_2q37.1	0.320324	2.07269e-13	1.75225e-10
ENSG00000157764.14	BRAF	HUERSP3B_9p13.3a	0.296347	1.02404e-11	1.76678e-10
ENSG00000105976.16	MET	MER41_11p15.5b	-0.306289	1.88522e-12	1.77085e-10
ENSG00000047936.11	ROS1	HERVL_1p22.2d	0.293974	1.5192e-11	1.79879e-10
ENSG00000047936.11	ROS1	HERVL_1p21.3b	0.293884	1.54198e-11	1.82066e-10
ENSG00000047936.11	ROS1	HML3_3q13.11a	0.293516	1.6386e-11	1.92935e-10
ENSG00000047936.11	ROS1	HML2_1q22	0.294502	1.74313e-11	2.03542e-10
ENSG00000120217.14	CD274	HERVIP10F_3p25.3	0.300136	5.41411e-12	2.04334e-10
ENSG00000120217.14	CD274	MER101_12p13.31b	0.301333	5.64364e-12	2.0926e-10
ENSG00000157764.14	BRAF	HML3_1p21.3	0.295271	1.22511e-11	2.09658e-10
ENSG00000120217.14	CD274	ERVLE_20q13.12c	0.299766	5.76432e-12	2.1005e-10
ENSG00000120217.14	CD274	HARLEQUIN_12p13.32	-0.299769	5.76117e-12	2.1005e-10
ENSG00000120217.14	CD274	ERVLE_7p22.3	0.29962	5.90832e-12	2.13457e-10
ENSG00000047936.11	ROS1	HERVE_10p13b	-0.292817	1.83885e-11	2.14127e-10
ENSG00000047936.11	ROS1	MER61_5p13.2	0.29274	1.86219e-11	2.16249e-10
ENSG00000047936.11	ROS1	MER61_4q21.23a	-0.292555	1.9198e-11	2.22328e-10
ENSG00000198400.12	NTRK1	HML2_1q22	0.299763	7.33235e-12	2.22977e-10
ENSG00000047936.11	ROS1	MER4_15q22.31b	0.292392	1.97209e-11	2.2776e-10
ENSG00000105976.16	MET	HERVFRD_14q11.2	-0.30456	2.54201e-12	2.28618e-10
ENSG00000047936.11	ROS1	LTR25_7q36.1	0.292252	2.01806e-11	2.32174e-10
ENSG00000146648.19	EGFR	HML1_1q23.3	0.304765	2.45381e-12	2.35733e-10
ENSG00000105976.16	MET	MER4_14q32.33a	0.304188	2.71045e-12	2.38689e-10
ENSG00000047936.11	ROS1	ERVLE_4p12e	0.291974	2.11219e-11	2.41957e-10
ENSG00000146648.19	EGFR	HERVL_2q37.1	-0.304453	2.58942e-12	2.43233e-10
ENSG00000188389.11	PDCD1	ERVLE_5q22.2b	0.29813	7.59571e-12	2.48892e-10
ENSG00000188389.11	PDCD1	HML2_10p14	0.298021	7.73593e-12	2.51537e-10
ENSG00000157764.14	BRAF	HERVL_4q24d	0.293907	1.53604e-11	2.58679e-10
ENSG00000198400.12	NTRK1	HML2_6q25.1	0.297373	8.62586e-12	2.60439e-10
ENSG00000047936.11	ROS1	ERVLE_5q31.3d	0.29132	2.3514e-11	2.67907e-10
ENSG00000198400.12	NTRK1	HERVIP10FH_Xq24	0.297096	9.03529e-12	2.68959e-10
ENSG00000047936.11	ROS1	ERV316A3_6p22.1m	0.291242	2.38138e-11	2.70594e-10
ENSG00000141736.14	ERBB2	HERVW_5p13.2a	0.315205	3.90904e-13	2.75392e-10
ENSG00000105976.16	MET	ERV316A3_6p22.1i	0.302869	3.399e-12	2.77243e-10
ENSG00000105976.16	MET	HERVIP10F_8p11.22	-0.302849	3.41061e-12	2.77243e-10
ENSG00000105976.16	MET	HERVL_Xq21.33b	-0.303042	3.29966e-12	2.77243e-10
ENSG00000157764.14	BRAF	HERVH_5q31.1a	0.293216	1.7218e-11	2.88811e-10
ENSG00000171094.18	ALK	MER4_12q12e	0.314028	4.82584e-13	2.91412e-10
ENSG00000047936.11	ROS1	HML1_15q21.2	-0.290587	2.65069e-11	2.98976e-10
ENSG00000047936.11	ROS1	LTR57_5p12a	0.29049	2.69285e-11	3.02731e-10
ENSG00000047936.11	ROS1	HERVL40_4q31.3a	0.29042	2.72394e-11	3.04606e-10
ENSG00000047936.11	ROS1	ERV316A3_12q21.1	-0.290391	2.73668e-11	3.05223e-10
ENSG00000157764.14	BRAF	ERVLE_2q24.2c	0.292745	1.86073e-11	3.10882e-10
ENSG00000198400.12	NTRK1	HERV3_7q33	0.297458	1.07395e-11	3.13076e-10
ENSG00000105976.16	MET	HERVH_7p21.1a	0.301953	3.97509e-12	3.17032e-10
ENSG00000120217.14	CD274	HERVFRD_14q11.2	-0.297162	8.93528e-12	3.1739e-10
ENSG00000120217.14	CD274	ERVLE_11q23.3c	0.297085	9.05171e-12	3.18846e-10
ENSG00000157764.14	BRAF	HML5_4q24	0.292231	2.02509e-11	3.34378e-10
ENSG00000120217.14	CD274	HERVH_2q33.2	0.296533	9.92804e-12	3.4329e-10
ENSG00000047936.11	ROS1	HERVH_3q11.1	0.28957	3.12835e-11	3.47988e-10
ENSG00000047936.11	ROS1	ERVLE_20q13.12b	0.289378	3.22734e-11	3.58057e-10
ENSG00000157764.14	BRAF	HML5_2q14.3	0.291695	2.21104e-11	3.6225e-10
ENSG00000163599.17	CTLA4	HERVFRD_3p21.31	0.293809	1.56118e-11	3.83668e-10
ENSG00000047936.11	ROS1	HUERSP3B_Xq13.2b	0.288892	3.49244e-11	3.84441e-10
ENSG00000105976.16	MET	HERVH48_7q22.1	0.300483	5.10438e-12	3.99559e-10
ENSG00000047936.11	ROS1	HML1_1q23.3	0.288601	3.6612e-11	3.99894e-10
ENSG00000163599.17	CTLA4	HERVP71A_8q24.13	0.293288	1.7014e-11	4.13323e-10
ENSG00000188389.11	PDCD1	HARLEQUIN_1q32.1	0.296209	1.31871e-11	4.22286e-10
ENSG00000047936.11	ROS1	HERVH_5q22.1	0.288088	3.97785e-11	4.32246e-10
ENSG00000120217.14	CD274	HERVL_9q22.32	-0.294929	1.29686e-11	4.35442e-10
ENSG00000120217.14	CD274	PRIMA4_14q22.1	0.294923	1.29798e-11	4.35442e-10
ENSG00000105976.16	MET	MER4_Xq21.33b	-0.299857	5.67598e-12	4.36225e-10
ENSG00000198400.12	NTRK1	LTR25_2p13.3	0.293928	1.53075e-11	4.43183e-10
ENSG00000047936.11	ROS1	HERVL_18q21.2a	0.287879	4.11443e-11	4.45941e-10
ENSG00000157764.14	BRAF	HERVH_4q21.3	0.290269	2.79164e-11	4.4868e-10
ENSG00000171094.18	ALK	MER101_1p35.2	0.310742	8.64866e-13	4.56974e-10
ENSG00000171094.18	ALK	HML3_4q34.1a	0.30968	1.04279e-12	4.89763e-10
ENSG00000120217.14	CD274	HML3_4q31.3	0.294013	1.50949e-11	5.0241e-10
ENSG00000047936.11	ROS1	LTR25_7q21.12	0.286968	4.76582e-11	5.15221e-10
ENSG00000165731.20	RET	HML2_8p22	0.307464	1.53669e-12	5.15953e-10
ENSG00000157764.14	BRAF	ERVLE_6p25.1a	0.289043	3.40805e-11	5.45676e-10
ENSG00000047936.11	ROS1	ERVLE_17q24.1	0.28645	5.17981e-11	5.55796e-10
ENSG00000047936.11	ROS1	HERVH_3q13.2	0.286478	5.15665e-11	5.55796e-10
ENSG00000165731.20	RET	PABLB_20p12.3	0.306406	1.84725e-12	5.57737e-10
ENSG00000120217.14	CD274	HERVE_10p13c	0.293138	1.74412e-11	5.75968e-10
ENSG00000163599.17	CTLA4	ERVLE_6p21.32	0.291055	2.45573e-11	5.86461e-10
ENSG00000047936.11	ROS1	HERVL_14q22.3b	-0.285761	5.78461e-11	6.1436e-10
ENSG00000120217.14	CD274	ERVLB4_9q31.3	0.292293	2.00458e-11	6.51796e-10
ENSG00000120217.14	CD274	ERVLE_6p21.32	0.292188	2.03925e-11	6.5801e-10
ENSG00000198400.12	NTRK1	ERV316A3_12q24.13	0.291237	2.38362e-11	6.67255e-10
ENSG00000163599.17	CTLA4	ERV316A3_Xq28i	0.29014	2.85099e-11	6.77029e-10
ENSG00000171094.18	ALK	HERVP71A_12p13.33a	0.307117	1.63267e-12	6.90128e-10
ENSG00000047936.11	ROS1	HERVL_9q22.32	-0.284734	6.81742e-11	7.16847e-10
ENSG00000163599.17	CTLA4	HERV3_19q13.33	0.289716	3.05503e-11	7.21432e-10
ENSG00000198400.12	NTRK1	HML1_1q23.3	0.290583	2.65253e-11	7.32827e-10
ENSG00000047936.11	ROS1	ERV316A3_3q29	0.284516	7.05814e-11	7.40317e-10
ENSG00000188389.11	PDCD1	HERVL40_9p24.1a	0.291243	2.38097e-11	7.51073e-10
ENSG00000163599.17	CTLA4	HERVL_5q12.3	0.289326	3.25493e-11	7.64367e-10
ENSG00000157764.14	BRAF	HERVL40_2q33.1	0.286809	4.88924e-11	7.65438e-10
ENSG00000157764.14	BRAF	MER101_7q22.1a	0.286756	4.93079e-11	7.69094e-10
ENSG00000105976.16	MET	HERVH_7q31.2	0.296179	1.05312e-11	7.80972e-10
ENSG00000198400.12	NTRK1	HML3_4q13.3b	0.290012	2.91122e-11	7.88827e-10
ENSG00000047936.11	ROS1	HERVL40_2p23.3b	0.284006	7.65514e-11	7.95043e-10
ENSG00000047936.11	ROS1	HML2_4p16.1a	0.283788	7.92581e-11	8.21137e-10
ENSG00000198400.12	NTRK1	ERV316A3_1p31.3f	0.289679	3.07333e-11	8.22213e-10
ENSG00000171094.18	ALK	ERVLB4_11p15.5c	0.30553	2.15018e-12	8.26256e-10
ENSG00000163599.17	CTLA4	HML3_9q34.13	0.288794	3.54856e-11	8.28716e-10
ENSG00000120217.14	CD274	HUERSP1_15q21.1a	0.290513	2.68292e-11	8.52684e-10
ENSG00000198400.12	NTRK1	MER41_9p13.3a	0.289143	3.35308e-11	8.91412e-10
ENSG00000047936.11	ROS1	HERVS71_19q13.12a	-0.284181	9.05291e-11	9.31062e-10
ENSG00000105976.16	MET	HERVH_8q24.21b	-0.295002	1.2811e-11	9.33658e-10
ENSG00000047936.11	ROS1	HERVH_8q24.22a	0.282784	9.29389e-11	9.51217e-10
ENSG00000165731.20	RET	ERVLE_5q12.3a	0.302012	3.93524e-12	9.78486e-10
ENSG00000120217.14	CD274	HERV9_15q21.1a	0.289604	3.11127e-11	9.81443e-10
ENSG00000198400.12	NTRK1	HUERSP3B_3q13.11	0.288407	3.77776e-11	9.85715e-10
ENSG00000188389.11	PDCD1	HERV3_7q33	0.290386	3.38948e-11	1.04579e-09
ENSG00000198400.12	NTRK1	HERVE_3p26.3	0.287817	4.15612e-11	1.06472e-09
ENSG00000047936.11	ROS1	HERVL_7q36.1b	-0.283171	1.05994e-10	1.07961e-09
ENSG00000188389.11	PDCD1	HARLEQUIN_7q33a	0.289685	3.79186e-11	1.16146e-09
ENSG00000157764.14	BRAF	HML5_1q42.12	0.283933	7.74417e-11	1.1775e-09
ENSG00000047936.11	ROS1	MER4B_21q22.3	0.281169	1.19902e-10	1.201e-09
ENSG00000157764.14	BRAF	HERVH_4q35.2c	0.283663	8.08356e-11	1.2247e-09
ENSG00000163599.17	CTLA4	HERVL_1p22.2d	0.286215	5.37871e-11	1.24922e-09
ENSG00000047936.11	ROS1	MER101_15q15.2	0.280862	1.25828e-10	1.25738e-09
ENSG00000157764.14	BRAF	HERVH_10q24.2a	0.283406	8.42093e-11	1.26674e-09
ENSG00000198400.12	NTRK1	HUERSP3_1q23.3	0.286537	5.10783e-11	1.28517e-09
ENSG00000198400.12	NTRK1	HML3_Xq21.1a	0.286432	5.1947e-11	1.29929e-09
ENSG00000047936.11	ROS1	HERVK11_8q11.1	-0.280583	1.31466e-10	1.30603e-09
ENSG00000047936.11	ROS1	HML3_1p21.3	0.280575	1.31622e-10	1.30603e-09
ENSG00000047936.11	ROS1	ERVLE_12p11.23	0.281742	1.32348e-10	1.31015e-09
ENSG00000198400.12	NTRK1	HERVH_12p11.22a	0.28623	5.36568e-11	1.33416e-09
ENSG00000105976.16	MET	HUERSP3B_7p21.3	0.292475	1.94522e-11	1.37041e-09
ENSG00000157764.14	BRAF	ERVLE_4q24g	0.282777	9.30334e-11	1.37983e-09
ENSG00000165731.20	RET	HERVW_3p11.1	0.298958	6.60743e-12	1.39648e-09
ENSG00000047936.11	ROS1	ERVLE_20q13.33b	-0.280084	1.42162e-10	1.40401e-09
ENSG00000047936.11	ROS1	ERV316A3_1q25.3b	0.280068	1.42527e-10	1.40434e-09
ENSG00000047936.11	ROS1	MER4_7p14.3b	0.279913	1.46021e-10	1.43209e-09
ENSG00000047936.11	ROS1	HUERSP2_3q26.33	0.279735	1.50137e-10	1.46905e-09
ENSG00000047936.11	ROS1	HERVH_15q25.3a	0.279711	1.50713e-10	1.47128e-09
ENSG00000120217.14	CD274	HERVL_14q22.3b	-0.286867	4.84388e-11	1.4837e-09
ENSG00000047936.11	ROS1	HERVE_10p11.21	0.279375	1.58815e-10	1.54325e-09
ENSG00000146648.19	EGFR	MER4_7p14.3b	0.292124	2.06083e-11	1.58384e-09
ENSG00000146648.19	EGFR	ERVLB4_Xq21.33c	-0.291949	2.12108e-11	1.60104e-09
ENSG00000047936.11	ROS1	HML2_7q22.2	0.279012	1.68078e-10	1.62625e-09
ENSG00000198400.12	NTRK1	ERVLB4_1q23.1a	0.284857	6.68409e-11	1.63316e-09
ENSG00000047936.11	ROS1	MER4_8q24.3b	0.280138	1.69543e-10	1.63621e-09
ENSG00000047936.11	ROS1	HERV9_7p14.2	0.278813	1.73374e-10	1.66937e-09
ENSG00000198400.12	NTRK1	ERVLE_Xq22.1a	0.284608	6.95511e-11	1.67041e-09
ENSG00000047936.11	ROS1	PABLA_6q27b	0.278775	1.74419e-10	1.67561e-09
ENSG00000047936.11	ROS1	MER4B_12p13.31c	0.279893	1.7605e-10	1.68744e-09
ENSG00000047936.11	ROS1	ERVLB4_10q22.3a	0.278525	1.81318e-10	1.73401e-09
ENSG00000157764.14	BRAF	HERVFH21_14q32.31b	0.28102	1.22742e-10	1.75875e-09
ENSG00000165731.20	RET	ERVLB4_5q12.3a	0.296844	9.42386e-12	1.7703e-09
ENSG00000165731.20	RET	HARLEQUIN_12p13.32	0.296713	9.63257e-12	1.7703e-09
ENSG00000047936.11	ROS1	HERVL18_4q21.23	-0.278341	1.86604e-10	1.77745e-09
ENSG00000047936.11	ROS1	HERVH_5q23.2f	0.278292	1.88034e-10	1.78611e-09
ENSG00000198400.12	NTRK1	ERVLE_6q22.31b	0.284009	7.65101e-11	1.82716e-09
ENSG00000157764.14	BRAF	HERVH_13q13.3a	0.280724	1.28593e-10	1.83636e-09
ENSG00000146648.19	EGFR	ERVLE_2q14.1b	0.290733	2.58823e-11	1.91938e-09
ENSG00000171094.18	ALK	HERVL_4q34.1c	0.300078	5.46768e-12	1.92599e-09
ENSG00000157764.14	BRAF	HML2_11q12.3a	0.280339	1.36589e-10	1.94398e-09
ENSG00000047936.11	ROS1	HERVH_13q14.2a	0.277678	2.06818e-10	1.95575e-09
ENSG00000047936.11	ROS1	HERVE_1p36.12	0.27761	2.09007e-10	1.97204e-09
ENSG00000165731.20	RET	HUERSP1_20p12.3	0.295477	1.18383e-11	2.01891e-09
ENSG00000105976.16	MET	ERVLB4_Xq21.33a	-0.2899	2.96504e-11	2.02148e-09
ENSG00000157168.20	NRG1	HERVL_4q32.1a	0.311662	9.6636e-13	2.0424e-09
ENSG00000157168.20	NRG1	HUERSP3B_1p33a	0.310763	8.61714e-13	2.0424e-09
ENSG00000157764.14	BRAF	ERV316A3_6p25.1b	0.279901	1.46292e-10	2.06159e-09
ENSG00000157764.14	BRAF	ERV316A3_6q13b	0.2799	1.46316e-10	2.06159e-09
ENSG00000047936.11	ROS1	ERV316A3_9p21.1b	-0.277285	2.19819e-10	2.06943e-09
ENSG00000120217.14	CD274	ERVLB4_Xq21.33b	-0.284654	6.90481e-11	2.06997e-09
ENSG00000047936.11	ROS1	ERVLB4_6q27e	-0.277258	2.20728e-10	2.07337e-09
ENSG00000047936.11	ROS1	HERVH_1q31.1a	0.276666	2.41902e-10	2.25722e-09
ENSG00000171094.18	ALK	ERVL_22q12.3b	0.298656	6.95253e-12	2.26064e-09
ENSG00000047936.11	ROS1	ERVLE_7p21.3b	-0.276625	2.43427e-10	2.26644e-09
ENSG00000120217.14	CD274	HERVH_22q13.1b	0.283979	7.68857e-11	2.2887e-09
ENSG00000047936.11	ROS1	HML6_14q12b	-0.276529	2.47078e-10	2.29539e-09
ENSG00000163599.17	CTLA4	HERVL_3p13b	0.282238	1.01313e-10	2.30243e-09
ENSG00000163599.17	CTLA4	MER41_1q44a	0.282138	1.0293e-10	2.32666e-09
ENSG00000146648.19	EGFR	HERVFH21_7q11.21	0.289404	3.21418e-11	2.34247e-09
ENSG00000141736.14	ERBB2	HERVH_19p13.3b	0.302024	3.92733e-12	2.37154e-09
ENSG00000120217.14	CD274	HERVEA_5q22.2	0.283709	8.02522e-11	2.37221e-09
ENSG00000157764.14	BRAF	MER4_20p11.21a	0.27871	1.76187e-10	2.45789e-09
ENSG00000141736.14	ERBB2	MER41_7q11.23	0.300881	4.77145e-12	2.52111e-09
ENSG00000198400.12	NTRK1	HERVFH19_13q34	0.281611	1.11852e-10	2.60303e-09
ENSG00000198400.12	NTRK1	MER101_19q13.2c	0.281598	1.12078e-10	2.60303e-09
ENSG00000047936.11	ROS1	MER61_6q24.1b	0.275697	2.80848e-10	2.60338e-09
ENSG00000120217.14	CD274	MER61_6q24.1b	0.282991	8.99394e-11	2.6401e-09
ENSG00000198400.12	NTRK1	HERVH_19p13.2d	0.282504	1.17579e-10	2.70112e-09
ENSG00000163599.17	CTLA4	PABLB_1q31.3a	0.28107	1.2178e-10	2.70928e-09
ENSG00000047936.11	ROS1	HERVL_12q21.2b	0.275243	3.01141e-10	2.77325e-09
ENSG00000146648.19	EGFR	ERV316A3_8q24.12b	0.287918	4.08872e-11	2.83328e-09
ENSG00000146648.19	EGFR	ERVLE_17q24.1	0.288071	3.98921e-11	2.83328e-09
ENSG00000198400.12	NTRK1	HERV4_8q24.3	0.280358	1.36182e-10	3.09486e-09
ENSG00000133703.13	KRAS	HERVE_10p11.21	-0.301317	4.42991e-12	3.12087e-09
ENSG00000188389.11	PDCD1	MER101_1p22.2b	0.282021	1.0485e-10	3.12112e-09
ENSG00000047936.11	ROS1	HUERSP2_12q21.1	-0.274183	3.54281e-10	3.23444e-09
ENSG00000146648.19	EGFR	HERVE_1p36.12	0.286833	4.87045e-11	3.26784e-09
ENSG00000188389.11	PDCD1	MER4_2p21	0.281428	1.15121e-10	3.4029e-09
ENSG00000171094.18	ALK	HERVH_6p21.32	0.295699	1.14094e-11	3.44481e-09
ENSG00000157764.14	BRAF	MER41_19q13.43a	0.277324	2.60845e-10	3.54531e-09
ENSG00000047936.11	ROS1	MER34B_19p13.11	0.273521	3.91972e-10	3.57083e-09
ENSG00000120217.14	CD274	ERVLE_7q34a	0.280848	1.26101e-10	3.62605e-09
ENSG00000047936.11	ROS1	HERVH_3p26.3b	0.273262	4.07747e-10	3.70655e-09
ENSG00000198400.12	NTRK1	HERVK11_1p13.3	0.279102	1.65749e-10	3.70699e-09
ENSG00000198400.12	NTRK1	MER4_6q22.1b	0.279045	1.67211e-10	3.72001e-09
ENSG00000047936.11	ROS1	ERVLB4_17q24.3	-0.273145	4.15069e-10	3.76502e-09
ENSG00000105976.16	MET	HML4_10p15.1	-0.285432	6.098e-11	3.96558e-09
ENSG00000163599.17	CTLA4	HERVW_6q22.1	0.278397	1.8497e-10	4.03026e-09
ENSG00000047936.11	ROS1	HUERSP2_14q31.3	0.272618	4.49678e-10	4.05286e-09
ENSG00000157764.14	BRAF	HERVH_5p15.33	0.27522	3.02207e-10	4.06824e-09
ENSG00000120217.14	CD274	HERVL_1p21.3b	0.279889	1.46577e-10	4.15827e-09
ENSG00000047936.11	ROS1	HERV9_10p13	0.272256	4.75102e-10	4.24578e-09
ENSG00000198400.12	NTRK1	HERVH_5q23.2e	0.278009	1.96484e-10	4.32572e-09
ENSG00000157764.14	BRAF	ERVLE_1p34.2a	0.274688	3.27924e-10	4.37267e-09
ENSG00000157764.14	BRAF	HERVL74_19p13.2b	0.274623	3.31195e-10	4.40239e-09
ENSG00000165731.20	RET	MER4B_2q31.1	-0.291446	2.85884e-11	4.47568e-09
ENSG00000120217.14	CD274	HERV3_7q33	0.280417	1.62419e-10	4.51931e-09
ENSG00000198400.12	NTRK1	ERV316A3_4q31.1b	0.277551	2.10952e-10	4.62018e-09
ENSG00000157168.20	NRG1	HERVH_4q22.3a	0.302795	3.44229e-12	4.85018e-09
ENSG00000120217.14	CD274	MER4_Xq21.33a	-0.278679	1.77026e-10	4.85903e-09
ENSG00000198400.12	NTRK1	MER4_8q24.3c	0.277132	2.25073e-10	4.8789e-09
ENSG00000198400.12	NTRK1	ERVLE_2p14b	0.276954	2.31356e-10	4.96417e-09
ENSG00000163599.17	CTLA4	HERV4_12p11.21	0.276961	2.31099e-10	4.98397e-09
ENSG00000146648.19	EGFR	MER4_Xq21.33b	-0.283831	7.87136e-11	5.1188e-09
ENSG00000047936.11	ROS1	LTR57_2q37.1	0.270822	5.90213e-10	5.20841e-09
ENSG00000157764.14	BRAF	HERVL40_5q11.2	0.273372	4.00967e-10	5.24733e-09
ENSG00000047936.11	ROS1	HML3_4q13.3b	0.27069	6.02022e-10	5.29053e-09
ENSG00000047936.11	ROS1	HUERSP1_14q23.1	0.270702	6.00932e-10	5.29053e-09
ENSG00000047936.11	ROS1	HERVH48_1p22.3	0.27057	6.12995e-10	5.37579e-09
ENSG00000146648.19	EGFR	LTR25_7q21.12	0.283422	8.40011e-11	5.37989e-09
ENSG00000105976.16	MET	HERVL18_6q14.1	-0.283286	8.58308e-11	5.41503e-09
ENSG00000047936.11	ROS1	MER41_8q24.3	-0.27031	6.37524e-10	5.57933e-09
ENSG00000141736.14	ERBB2	HERVL_3p13b	-0.29461	1.36722e-11	5.77922e-09
ENSG00000146648.19	EGFR	ERV316A3_1q25.3b	0.282383	9.90227e-11	5.97956e-09
ENSG00000146648.19	EGFR	MER4_6p12.1	-0.282463	9.77692e-11	5.97956e-09
ENSG00000047936.11	ROS1	ERVLE_Xp11.4b	0.269798	6.88478e-10	6.0004e-09
ENSG00000157764.14	BRAF	HERVIP10F_19q13.41a	0.273498	4.65017e-10	6.01109e-09
ENSG00000105976.16	MET	HERVIP10F_3p25.3	0.282438	9.81657e-11	6.10215e-09
ENSG00000198400.12	NTRK1	HML6_19p13.2b	0.275497	2.8964e-10	6.1523e-09
ENSG00000146648.19	EGFR	HUERSP3B_Xq21.33	-0.282039	1.0455e-10	6.22439e-09
ENSG00000047936.11	ROS1	MER61_4q31.21b	0.269523	7.17582e-10	6.24119e-09
ENSG00000105976.16	MET	HML5_Xq21.33	-0.282179	1.02261e-10	6.26457e-09
ENSG00000047936.11	ROS1	ERVLE_3p21.31a	0.269449	7.25548e-10	6.29751e-09
ENSG00000198400.12	NTRK1	HERVH_7p21.1a	0.275205	3.02924e-10	6.34776e-09
ENSG00000188389.11	PDCD1	MER61_5q23.2b	0.277236	2.215e-10	6.36925e-09
ENSG00000157168.20	NRG1	ERV316A3_3q13.12c	0.299404	6.12785e-12	6.47561e-09
ENSG00000188389.11	PDCD1	HML3_Xq21.1a	0.277082	2.26843e-10	6.47883e-09
ENSG00000157764.14	BRAF	HERVL_1p21.3b	0.271329	5.46673e-10	7.00238e-09
ENSG00000157764.14	BRAF	HERVH_14q24.3b	0.271077	5.67942e-10	7.231e-09
ENSG00000198400.12	NTRK1	HERVL74_19p13.2b	0.274297	3.48165e-10	7.24972e-09
ENSG00000105976.16	MET	MER4_5p12b	0.2811	1.21211e-10	7.29092e-09
ENSG00000120217.14	CD274	LTR25_1q22	0.275954	2.69952e-10	7.31466e-09
ENSG00000047936.11	ROS1	HERVH_19q13.41a	0.269376	8.58428e-10	7.36019e-09
ENSG00000157764.14	BRAF	ERVLE_22q11.23b	0.270928	5.80801e-10	7.3725e-09
ENSG00000141736.14	ERBB2	HERVH_3q26.31c	0.291942	2.12332e-11	7.4794e-09
ENSG00000047936.11	ROS1	ERVL_16p12.3	0.268144	8.8187e-10	7.54588e-09
ENSG00000157764.14	BRAF	MER101_7q22.1b	0.270719	5.99416e-10	7.57855e-09
ENSG00000157764.14	BRAF	ERV316A3_1q25.3b	0.270505	6.19108e-10	7.76549e-09
ENSG00000120217.14	CD274	HML3_7p13	0.27534	2.96703e-10	7.93775e-09
ENSG00000047936.11	ROS1	HARLEQUIN_Yq11.221c	-0.268627	9.58554e-10	8.16897e-09
ENSG00000198400.12	NTRK1	MER41_19q13.43a	0.274316	4.11244e-10	8.43849e-09
ENSG00000047936.11	ROS1	HERVE_10p13c	0.267302	9.99759e-10	8.4689e-09
ENSG00000157764.14	BRAF	HML2_7q11.21	0.269848	6.83328e-10	8.49538e-09
ENSG00000188389.11	PDCD1	HERV4_4q12	0.276347	3.0261e-10	8.58477e-09
ENSG00000198400.12	NTRK1	MER4_20q13.13	0.273039	4.21834e-10	8.61397e-09
ENSG00000047936.11	ROS1	HERVL_4q32.1c	0.267101	1.03e-09	8.69026e-09
ENSG00000198400.12	NTRK1	HML3_8q24.13	0.272931	4.2883e-10	8.71472e-09
ENSG00000120217.14	CD274	MER101_18q21.1b	-0.275644	3.36584e-10	8.89212e-09
ENSG00000163599.17	CTLA4	LTR25_12p11.22b	0.27311	4.1729e-10	8.90851e-09
ENSG00000120217.14	CD274	HARLEQUIN_6q23.1	0.274287	3.48707e-10	9.15518e-09
ENSG00000146648.19	EGFR	MER4_Xq21.33c	-0.27923	1.62469e-10	9.40762e-09
ENSG00000198400.12	NTRK1	HARLEQUIN_7q33a	0.273436	4.69338e-10	9.4923e-09
ENSG00000105976.16	MET	HERV9_5q31.2	-0.27902	1.6787e-10	9.58899e-09
ENSG00000198400.12	NTRK1	ERVLE_4p12e	0.272159	4.82179e-10	9.70557e-09
ENSG00000157764.14	BRAF	HERV3_4p16.1	0.268899	7.8781e-10	9.70792e-09
ENSG00000157764.14	BRAF	HERVL40_2p23.3b	0.26888	7.90046e-10	9.70792e-09
ENSG00000047936.11	ROS1	ERVLB4_3q29b	0.2661	1.1947e-09	9.96054e-09
ENSG00000157764.14	BRAF	HERVL40_4q31.3a	0.268543	8.30989e-10	1.0152e-08
ENSG00000188389.11	PDCD1	ERVLB4_9q31.3	0.27407	3.60449e-10	1.01575e-08
ENSG00000047936.11	ROS1	ERVLE_3q28e	0.265945	1.22253e-09	1.01591e-08
ENSG00000157764.14	BRAF	HERVL_12q13.13	0.268517	8.34197e-10	1.01618e-08
ENSG00000146648.19	EGFR	HERVH_7p15.3b	0.278367	1.85844e-10	1.06157e-08
ENSG00000047936.11	ROS1	PABLB_20p12.3	-0.265543	1.29725e-09	1.06269e-08
ENSG00000047936.11	ROS1	ERVLB4_3q25.31a	0.265319	1.34076e-09	1.09409e-08
ENSG00000163599.17	CTLA4	HERV3_7q33	0.27277	5.18577e-10	1.10152e-08
ENSG00000163599.17	CTLA4	HML2_14q32.33	0.271608	5.24147e-10	1.10779e-08
ENSG00000047936.11	ROS1	ERV316A3_11q12.1a	0.265202	1.36415e-09	1.11104e-08
ENSG00000047936.11	ROS1	HERVIP10FH_15q25.1	0.266112	1.38496e-09	1.12581e-08
ENSG00000198400.12	NTRK1	MER61_5p13.2	0.271061	5.6931e-10	1.1298e-08
ENSG00000141736.14	ERBB2	ERVLB4_8q24.3d	0.289666	3.80344e-11	1.14837e-08
ENSG00000047936.11	ROS1	ERVLE_11q23.3d	0.264809	1.44534e-09	1.16592e-08
ENSG00000120217.14	CD274	HARLEQUIN_7q33a	0.273748	4.47892e-10	1.16799e-08
ENSG00000120217.14	CD274	HERV4_4q12	0.273711	4.50396e-10	1.16799e-08
ENSG00000157764.14	BRAF	HERVIP10F_1q44	0.267442	9.79123e-10	1.17578e-08
ENSG00000157764.14	BRAF	MER4_6q22.1b	0.267306	9.99114e-10	1.19301e-08
ENSG00000198400.12	NTRK1	MER41_6p21.32	0.270359	6.32866e-10	1.25006e-08
ENSG00000105976.16	MET	HERVH_9p13.3c	-0.277021	2.28965e-10	1.25693e-08
ENSG00000047936.11	ROS1	HERVL40_Xp11.21b	0.265213	1.57818e-09	1.26584e-08
ENSG00000047936.11	ROS1	HUERSP1_1p13.3	0.264025	1.62179e-09	1.29345e-08
ENSG00000198400.12	NTRK1	HERVL18_3p21.31b	0.269967	6.71224e-10	1.31355e-08
ENSG00000105976.16	MET	HERVW_3p11.1	-0.276614	2.43855e-10	1.32151e-08
ENSG00000198400.12	NTRK1	ERV316A3_3q13.12c	0.269857	6.82477e-10	1.32942e-08
ENSG00000141736.14	ERBB2	HUERSP3_8q11.1	0.286583	5.06986e-11	1.33939e-08
ENSG00000198400.12	NTRK1	HERVH_2p11.2c	0.269662	7.02727e-10	1.35506e-08
ENSG00000198400.12	NTRK1	HML3_10q11.21a	0.270765	6.98958e-10	1.35506e-08
ENSG00000047936.11	ROS1	HERVL_2q34c	0.263681	1.70577e-09	1.35532e-08
ENSG00000120217.14	CD274	HML1_10p15.1	-0.271444	5.37249e-10	1.37633e-08
ENSG00000120217.14	CD274	LTR23_9q22.33a	0.271468	5.35299e-10	1.37633e-08
ENSG00000105976.16	MET	HERVFRD_7q21.3	0.27605	2.65997e-10	1.42325e-08
ENSG00000047936.11	ROS1	MER41_15q22.31b	0.263207	1.8281e-09	1.44707e-08
ENSG00000198400.12	NTRK1	HERVL_4q32.1a	0.270079	7.73767e-10	1.46669e-08
ENSG00000120217.14	CD274	MER4_14q12b	-0.270909	5.82513e-10	1.47442e-08
ENSG00000165731.20	RET	HERVH_9q34.13	0.281599	1.12051e-10	1.48013e-08
ENSG00000198400.12	NTRK1	HERVL18_11q14.2b	0.268788	8.01033e-10	1.50487e-08
ENSG00000188389.11	PDCD1	HERVL_1p22.2d	0.271348	5.45154e-10	1.50612e-08
ENSG00000198400.12	NTRK1	HERVH_19q13.32b	0.268744	8.06299e-10	1.50806e-08
ENSG00000198400.12	NTRK1	ERVLE_2q24.2c	0.268576	8.26867e-10	1.53972e-08
ENSG00000047936.11	ROS1	HERVL18_15q21.3	0.262428	2.04815e-09	1.61823e-08
ENSG00000188389.11	PDCD1	HERVW_6q22.1	0.270786	5.93429e-10	1.61834e-08
ENSG00000047936.11	ROS1	MER101_2q13b	0.26231	2.08369e-09	1.64324e-08
ENSG00000105976.16	MET	ERV316A3_13q14.13	-0.274824	3.21175e-10	1.67606e-08
ENSG00000047936.11	ROS1	MER41_9p13.3a	0.262012	2.17597e-09	1.71282e-08
ENSG00000188389.11	PDCD1	HERVL_3p13b	0.27032	6.36582e-10	1.71391e-08
ENSG00000163599.17	CTLA4	ERVLB4_1p36.11	0.268469	8.40212e-10	1.75821e-08
ENSG00000157764.14	BRAF	HUERSP3_2p13.3	0.264558	1.49971e-09	1.76581e-08
ENSG00000047936.11	ROS1	ERVLE_8p23.1a	0.261741	2.26338e-09	1.77831e-08
ENSG00000157764.14	BRAF	ERV316A3_11q23.3f	0.26444	1.52606e-09	1.78689e-08
ENSG00000047936.11	ROS1	ERV316A3_5p15.2e	-0.261559	2.32416e-09	1.81377e-08
ENSG00000157764.14	BRAF	HERVL_2q34c	0.264226	1.57471e-09	1.83876e-08
ENSG00000120217.14	CD274	MER41_6p21.32	0.269239	7.48806e-10	1.851e-08
ENSG00000163599.17	CTLA4	HARLEQUIN_7q33a	0.269135	8.8943e-10	1.85203e-08
ENSG00000163599.17	CTLA4	HERVH_5q23.2e	0.268018	8.98719e-10	1.8622e-08
ENSG00000047936.11	ROS1	HML1_10p15.1	-0.261282	2.41944e-09	1.88342e-08
ENSG00000157764.14	BRAF	HERVH_6p21.2b	0.263918	1.64736e-09	1.91829e-08
ENSG00000047936.11	ROS1	MER4_1p21.3	0.261722	2.60923e-09	2.02371e-08
ENSG00000146648.19	EGFR	HML2_8p22	-0.273872	3.71524e-10	2.06636e-08
ENSG00000188389.11	PDCD1	PRIMA41_20q13.33	0.268797	7.9992e-10	2.11329e-08
ENSG00000047936.11	ROS1	ERVLB4_4q23b	0.261224	2.8018e-09	2.16908e-08
ENSG00000120217.14	CD274	HUERSP2_12q21.1	-0.267978	9.04078e-10	2.18374e-08
ENSG00000120217.14	CD274	ERVLE_6q22.31b	0.267908	9.13548e-10	2.19407e-08
ENSG00000157764.14	BRAF	HERVH_10p11.21	0.262839	1.92913e-09	2.22799e-08
ENSG00000198400.12	NTRK1	HERVW_6p25.3	0.265845	1.24072e-09	2.26057e-08
ENSG00000047936.11	ROS1	ERVLE_15q15.1	0.259967	2.92576e-09	2.26091e-08
ENSG00000141736.14	ERBB2	MER4_4p12a	0.282546	9.64954e-11	2.26603e-08
ENSG00000047936.11	ROS1	HERVL18_4p15.2b	0.259743	3.02161e-09	2.32224e-08
ENSG00000146648.19	EGFR	HUERSP3B_3q28a	0.273016	4.23311e-10	2.32381e-08
ENSG00000163599.17	CTLA4	HERVH_10p14a	0.266388	1.14484e-09	2.34914e-08
ENSG00000157168.20	NRG1	HERVL_13q33.3	0.289079	3.38833e-11	2.43674e-08
ENSG00000047936.11	ROS1	HERVIP10F_1p35.2a	-0.259358	3.19416e-09	2.44154e-08
ENSG00000047936.11	ROS1	HERVH_17p12	0.259291	3.22473e-09	2.46046e-08
ENSG00000163599.17	CTLA4	HERVH_2q31.1c	0.265971	1.21777e-09	2.47476e-08
ENSG00000047936.11	ROS1	HERVE_5q14.3b	-0.259082	3.32298e-09	2.53085e-08
ENSG00000198400.12	NTRK1	MER41_6p22.3	0.265946	1.41888e-09	2.57408e-08
ENSG00000163599.17	CTLA4	HERVIP10FH_2p14	0.265597	1.287e-09	2.60295e-08
ENSG00000157764.14	BRAF	MER61_2q35	0.261687	2.28122e-09	2.60614e-08
ENSG00000157764.14	BRAF	HERVW_19p12d	0.261634	2.29877e-09	2.61207e-08
ENSG00000120217.14	CD274	HERV4_12p11.21	0.266544	1.11877e-09	2.65676e-08
ENSG00000120217.14	CD274	HERVE_1p36.12	0.266392	1.1443e-09	2.70222e-08
ENSG00000188389.11	PDCD1	HUERSP3_2p25.2	0.266911	1.05953e-09	2.73087e-08
ENSG00000105976.16	MET	HERVK11D_5p13.2	-0.271373	5.43079e-10	2.74313e-08
ENSG00000105976.16	MET	MER4_Xq21.31c	0.272436	5.45122e-10	2.74313e-08
ENSG00000198400.12	NTRK1	MER41_Xq13.3b	0.264472	1.51875e-09	2.74349e-08
ENSG00000198400.12	NTRK1	HERV9_17q22a	0.264394	1.53627e-09	2.76325e-08
ENSG00000141736.14	ERBB2	HERVH_1q41e	0.280877	1.25525e-10	2.79261e-08
ENSG00000163599.17	CTLA4	ERV316A3_6p21.33b	0.264971	1.41134e-09	2.82737e-08
ENSG00000163599.17	CTLA4	HERVH_12p11.22a	0.265002	1.40499e-09	2.82737e-08
ENSG00000047936.11	ROS1	HERVH_12q21.2a	0.258234	3.75273e-09	2.83264e-08
ENSG00000047936.11	ROS1	HERVH_3p21.31e	0.257874	3.95089e-09	2.9716e-08
ENSG00000047936.11	ROS1	HERVL18_5q21.2	-0.257803	3.99148e-09	2.9968e-08
ENSG00000157764.14	BRAF	HERVL66_19p12g	0.260468	2.72167e-09	3.07607e-08
ENSG00000105976.16	MET	HERVH_4q22.3a	0.270371	6.31699e-10	3.10487e-08
ENSG00000171094.18	ALK	MER34B_19p13.11	0.27982	1.48148e-10	3.13111e-08
ENSG00000157764.14	BRAF	ERV316A3_8q24.12c	0.26024	2.81269e-09	3.1453e-08
ENSG00000047936.11	ROS1	HERVH_6q23.1	0.25739	4.23392e-09	3.16757e-08
ENSG00000157764.14	BRAF	HML3_3p21.31b	0.260052	2.88999e-09	3.21474e-08
ENSG00000047936.11	ROS1	MER61_1q23.1c	0.256899	4.54062e-09	3.38505e-08
ENSG00000105976.16	MET	ERVLE_11q23.3c	0.269636	7.05431e-10	3.42742e-08
ENSG00000198400.12	NTRK1	HERVH_4q35.2c	0.262729	1.96015e-09	3.43798e-08
ENSG00000163599.17	CTLA4	PRIMA41_20q13.33	0.263437	1.7677e-09	3.52456e-08
ENSG00000157764.14	BRAF	HML6_12p11.21	0.259252	3.24298e-09	3.58851e-08
ENSG00000157764.14	BRAF	ERVLE_15q25.1a	0.259193	3.2704e-09	3.6e-08
ENSG00000198400.12	NTRK1	HERVH_3q22.1e	0.26211	2.14509e-09	3.7161e-08
ENSG00000146648.19	EGFR	HERVL_7q36.1b	-0.270547	7.21933e-10	3.72148e-08
ENSG00000120217.14	CD274	MER61_5q23.2b	0.263927	1.6453e-09	3.80038e-08
ENSG00000171094.18	ALK	ERVLB4_17q21.32	0.277897	1.9992e-10	3.83345e-08
ENSG00000171094.18	ALK	HERVL40_4q31.3b	0.277623	2.08586e-10	3.83345e-08
ENSG00000105976.16	MET	LTR57_14q32.33a	0.268689	8.12945e-10	3.90491e-08
ENSG00000120217.14	CD274	ERVLE_3q25.1	0.263659	1.7112e-09	3.9311e-08
ENSG00000198400.12	NTRK1	HML5_8p21.2	0.26131	2.40935e-09	4.12321e-08
ENSG00000171094.18	ALK	HERVH_12p11.22a	0.276743	2.39036e-10	4.21002e-08
ENSG00000047936.11	ROS1	HML6_7p13	0.256112	5.76759e-09	4.24732e-08
ENSG00000157764.14	BRAF	ERV316A3_16p12.1	0.257842	3.96912e-09	4.25824e-08
ENSG00000165731.20	RET	HERVL18_4q21.1	0.273923	3.68617e-10	4.32817e-08
ENSG00000146648.19	EGFR	MER61_4q31.21b	0.268047	8.94734e-10	4.50243e-08
ENSG00000120217.14	CD274	HERVEA_19p13.3	0.26248	2.03271e-09	4.6195e-08
ENSG00000198400.12	NTRK1	LTR25_7q21.12	0.26034	2.77242e-09	4.66892e-08
ENSG00000157764.14	BRAF	HERVIP10F_22q13.2	-0.258015	4.41595e-09	4.67825e-08
ENSG00000188389.11	PDCD1	HML2_1q22	0.264004	1.87994e-09	4.70208e-08
ENSG00000047936.11	ROS1	ERV316A3_2q35f	0.254408	6.46024e-09	4.72447e-08
ENSG00000120217.14	CD274	HERV9_3p24.3	0.262228	2.10861e-09	4.76636e-08
ENSG00000171094.18	ALK	HERVE_10p13c	0.275427	2.92775e-10	4.95024e-08
ENSG00000198400.12	NTRK1	HUERSP1_14q23.1	0.259661	3.0576e-09	5.10849e-08
ENSG00000133703.13	KRAS	HUERSP1_Xp22.2	0.280979	1.23541e-10	5.2221e-08
ENSG00000047936.11	ROS1	HERVIP10F_1p35.2c	-0.253643	7.1939e-09	5.23384e-08
ENSG00000188389.11	PDCD1	HERVE_20p11.21b	-0.263112	2.13768e-09	5.31527e-08
ENSG00000047936.11	ROS1	HUERSP1_20p12.3	-0.253504	7.33566e-09	5.32781e-08
ENSG00000047936.11	ROS1	HERVH_4q35.2a	0.253474	7.36598e-09	5.34065e-08
ENSG00000198400.12	NTRK1	ERV316A3_2q35f	0.258824	3.44836e-09	5.71617e-08
ENSG00000163599.17	CTLA4	HERV9_3p24.3	0.260071	2.88218e-09	5.71971e-08
ENSG00000157764.14	BRAF	HERVH_19p13.2d	0.256412	5.53027e-09	5.75775e-08
ENSG00000188389.11	PDCD1	HARLEQUIN_20p12.1	0.261468	2.35502e-09	5.82145e-08
ENSG00000198400.12	NTRK1	ERV316A3_Xq28i	0.258636	3.54279e-09	5.84975e-08
ENSG00000198400.12	NTRK1	HERVH_9q21.33c	0.258555	3.58415e-09	5.87217e-08
ENSG00000163599.17	CTLA4	HERVEA_6q22.31	0.259615	3.07791e-09	6.0233e-08
ENSG00000163599.17	CTLA4	HERVL_12p13.1c	0.260413	3.14476e-09	6.12576e-08
ENSG00000105976.16	MET	LTR25_7q21.12	0.265489	1.30761e-09	6.1414e-08
ENSG00000198400.12	NTRK1	HERV9_4p14	0.258209	3.76647e-09	6.14705e-08
ENSG00000141736.14	ERBB2	ERVLB4_2q13c	0.275922	3.22738e-10	6.20097e-08
ENSG00000163599.17	CTLA4	HARLEQUIN_20p12.1	0.259337	3.20353e-09	6.21162e-08
ENSG00000157764.14	BRAF	LTR25_1q22	0.254763	6.14499e-09	6.33533e-08
ENSG00000157764.14	BRAF	ERV316A3_5q35.3d	0.254713	6.18888e-09	6.36506e-08
ENSG00000120217.14	CD274	MER4_Xq21.33b	-0.260196	2.83093e-09	6.36507e-08
ENSG00000198400.12	NTRK1	PRIMA4_Xp11.22	0.257918	3.92639e-09	6.3834e-08
ENSG00000047936.11	ROS1	HERVK11D_2q31.1	0.252118	8.90414e-09	6.41189e-08
ENSG00000047936.11	ROS1	HERVL_3q11.2c	-0.252062	8.9742e-09	6.45135e-08
ENSG00000047936.11	ROS1	HERVIP10F_7p13	0.252036	9.00712e-09	6.46402e-08
ENSG00000163599.17	CTLA4	PRIMA4_Xp11.22	0.258994	3.36533e-09	6.49554e-08
ENSG00000120217.14	CD274	HUERSP1_2q31.1a	0.259601	3.08416e-09	6.82553e-08
ENSG00000047936.11	ROS1	HERVL66_5q15	0.251593	9.57999e-09	6.83882e-08
ENSG00000047936.11	ROS1	HML2_11p15.4a	0.251582	9.59409e-09	6.83882e-08
ENSG00000047936.11	ROS1	HERVL_4q34.1c	0.251553	9.6341e-09	6.85578e-08
ENSG00000047936.11	ROS1	ERVLE_22q13.31e	-0.251513	9.68678e-09	6.87138e-08
ENSG00000047936.11	ROS1	HERVL_4q35.2	0.251361	9.89352e-09	6.96999e-08
ENSG00000157764.14	BRAF	ERV316A3_8q13.3a	-0.254789	6.93539e-09	7.06407e-08
ENSG00000047936.11	ROS1	HML2_8p23.1d	0.251239	1.00632e-08	7.07774e-08
ENSG00000047936.11	ROS1	PABLA_1q25.1	0.251215	1.00968e-08	7.08957e-08
ENSG00000047936.11	ROS1	HERVFRD_14q11.2	0.250908	1.05365e-08	7.3616e-08
ENSG00000047936.11	ROS1	HERVH_19p13.3b	0.250925	1.0511e-08	7.3616e-08
ENSG00000047936.11	ROS1	HERVK14C_16p12.3	0.250666	1.08966e-08	7.58816e-08
ENSG00000188389.11	PDCD1	ERV316A3_Xq28i	0.259469	3.1432e-09	7.6358e-08
ENSG00000047936.11	ROS1	HERVH_2q32.1c	0.250599	1.09983e-08	7.64632e-08
ENSG00000047936.11	ROS1	HERVFRD_Xq21.33b	0.250585	1.10184e-08	7.64777e-08
ENSG00000157764.14	BRAF	HERVIP10FH_10p11.23	0.25332	7.52663e-09	7.64785e-08
ENSG00000047936.11	ROS1	MER101_15q12	0.250565	1.10495e-08	7.65678e-08
ENSG00000047936.11	ROS1	HERVH_3p12.3a	0.250486	1.11714e-08	7.71593e-08
ENSG00000146648.19	EGFR	HML3_7p13	0.263991	1.62985e-09	7.74086e-08
ENSG00000157764.14	BRAF	HERVIP10FH_5q32	0.2532	7.65498e-09	7.75962e-08
ENSG00000198400.12	NTRK1	ERV316A3_3q29	0.256323	4.9277e-09	7.80127e-08
ENSG00000157764.14	BRAF	HERVK11_8p23.1c	0.253036	7.83275e-09	7.92082e-08
ENSG00000047936.11	ROS1	HERVH_8p23.1c	0.250259	1.15275e-08	7.93593e-08
ENSG00000047936.11	ROS1	MER61_2q32.3a	-0.250199	1.16243e-08	7.98116e-08
ENSG00000157764.14	BRAF	HML3_16p13.13	0.252793	8.10383e-09	8.14181e-08
ENSG00000188389.11	PDCD1	ERV316A3_2q22.3c	0.258922	3.40025e-09	8.21306e-08
ENSG00000165731.20	RET	HERVL_14q22.3b	0.269257	7.46743e-10	8.30654e-08
ENSG00000157764.14	BRAF	HERVL18_4p15.2b	0.252581	8.34778e-09	8.32218e-08
ENSG00000171094.18	ALK	ERVLE_15q25.1f	0.271054	5.69891e-10	8.60332e-08
ENSG00000047936.11	ROS1	MER4_7q21.2	0.249454	1.28823e-08	8.76867e-08
ENSG00000120217.14	CD274	MER101_1p22.2b	0.257634	4.08866e-09	9.00144e-08
ENSG00000171094.18	ALK	HUERSP3_2p25.2	0.270462	6.23067e-10	9.08174e-08
ENSG00000047936.11	ROS1	ERV316A3_8q24.12b	0.249075	1.35743e-08	9.18054e-08
ENSG00000198400.12	NTRK1	HERVIP10F_3p25.3	0.255	5.94321e-09	9.23601e-08
ENSG00000047936.11	ROS1	ERV316A3_8q24.12c	0.249013	1.36894e-08	9.24361e-08
ENSG00000047936.11	ROS1	HERV4_8q24.3	0.248956	1.3798e-08	9.30213e-08
ENSG00000198400.12	NTRK1	HERVH_3q26.1i	0.254837	6.08148e-09	9.38191e-08
ENSG00000047936.11	ROS1	HERVE_19q13.41	0.248754	1.4187e-08	9.53393e-08
ENSG00000047936.11	ROS1	HERVFH21_8q11.21	0.24867	1.43501e-08	9.61296e-08
ENSG00000047936.11	ROS1	LTR46_16q23.1	0.248681	1.43282e-08	9.61296e-08
ENSG00000047936.11	ROS1	PABLA_2p25.1	-0.24853	1.4629e-08	9.76887e-08
ENSG00000157764.14	BRAF	HERVE_19q13.41	0.251377	9.87282e-09	9.81939e-08
ENSG00000120217.14	CD274	HERVS71_19p13.3	0.256826	4.58766e-09	9.9959e-08
ENSG00000047936.11	ROS1	HERVH_1p34.3c	0.24835	1.49949e-08	9.99737e-08
ENSG00000146648.19	EGFR	HERVE_9q34.3	0.262061	2.16038e-09	1.00351e-07
ENSG00000141736.14	ERBB2	MER41_6p22.3	-0.272394	5.4854e-10	1.00812e-07
ENSG00000157764.14	BRAF	HERVL_7q11.21b	0.250969	1.04472e-08	1.03178e-07
ENSG00000198400.12	NTRK1	MER4B_12q22	0.253801	7.03554e-09	1.06976e-07
ENSG00000141736.14	ERBB2	HML2_11q23.3	0.270361	6.32675e-10	1.07163e-07
ENSG00000047936.11	ROS1	ERVLE_1p35.1c	0.248468	1.65055e-08	1.08843e-07
ENSG00000120217.14	CD274	HERVFH21_Xq11.2a	0.256067	5.10995e-09	1.10203e-07
ENSG00000120217.14	CD274	HML2_17p13.1	-0.255973	5.17842e-09	1.11113e-07
ENSG00000120217.14	CD274	HERVH_4q13.3	0.255843	5.27535e-09	1.12055e-07
ENSG00000120217.14	CD274	ERVLB4_1q23.1a	0.255686	5.39351e-09	1.13992e-07
ENSG00000188389.11	PDCD1	HML3_9q34.13	0.256498	4.80655e-09	1.14142e-07
ENSG00000157764.14	BRAF	ERVL_10p14	0.250157	1.16914e-08	1.14662e-07
ENSG00000120217.14	CD274	MER34B_7q36.1	0.255591	5.46629e-09	1.14955e-07
ENSG00000146648.19	EGFR	HERVL66_1q42.12	-0.260739	2.61732e-09	1.16683e-07
ENSG00000165731.20	RET	HERVL18_2q31.1	0.266462	1.13251e-09	1.16759e-07
ENSG00000188389.11	PDCD1	LTR23_9q22.33b	0.25627	4.96528e-09	1.17253e-07
ENSG00000157764.14	BRAF	ERVLE_2q14.1b	0.249955	1.20226e-08	1.17638e-07
ENSG00000146648.19	EGFR	HERVIP10FH_Xq24	0.260561	2.68534e-09	1.18239e-07
ENSG00000047936.11	ROS1	MER4_5p14.3b	-0.246721	1.87365e-08	1.22599e-07
ENSG00000157764.14	BRAF	MER101_2q13b	0.249563	1.26909e-08	1.23605e-07
ENSG00000047936.11	ROS1	HML4_10p15.1	-0.246516	1.92666e-08	1.251e-07
ENSG00000198400.12	NTRK1	HERVL_1p21.3b	0.252454	8.49691e-09	1.27817e-07
ENSG00000198400.12	NTRK1	HERVIP10FH_15q25.1	0.253269	8.5607e-09	1.28319e-07
ENSG00000198400.12	NTRK1	HERVH_7q21.2	0.252321	8.65554e-09	1.28827e-07
ENSG00000165731.20	RET	HERVL_2q37.1	0.265624	1.28185e-09	1.29009e-07
ENSG00000198400.12	NTRK1	MER101_1p22.2b	0.252275	8.71133e-09	1.29203e-07
ENSG00000165731.20	RET	MER4_5p13.2a	0.265419	1.32112e-09	1.29869e-07
ENSG00000120217.14	CD274	ERVL_Xq28b	-0.254403	6.46479e-09	1.33954e-07
ENSG00000157764.14	BRAF	HERVE_3p26.3	0.248835	1.40288e-08	1.35079e-07
ENSG00000146648.19	EGFR	HERVEA_19p12a	0.259499	3.12996e-09	1.36395e-07
ENSG00000157764.14	BRAF	HERVFRD_14q11.2	0.248713	1.42657e-08	1.37048e-07
ENSG00000047936.11	ROS1	ERV316A3_5q14.3a	0.245734	2.14262e-08	1.38273e-07
ENSG00000120217.14	CD274	ERVLB4_7q36.3a	0.254103	6.74369e-09	1.39052e-07
ENSG00000047936.11	ROS1	HERVE_11p15.4	0.246387	2.18495e-08	1.40575e-07
ENSG00000198400.12	NTRK1	MER4_10q23.31a	0.251546	9.64272e-09	1.41527e-07
ENSG00000188389.11	PDCD1	HERVH_10p14a	0.254867	6.0551e-09	1.42194e-07
ENSG00000146648.19	EGFR	ERVLE_1p36.12	0.259108	3.31102e-09	1.42813e-07
ENSG00000146648.19	EGFR	MER4_14q12b	-0.258768	3.47614e-09	1.45482e-07
ENSG00000120217.14	CD274	MER4_10q23.31a	0.253666	7.17014e-09	1.46416e-07
ENSG00000188389.11	PDCD1	HERV4_12p11.21	0.25459	6.29631e-09	1.47041e-07
ENSG00000171094.18	ALK	MER41_1q44a	0.266786	1.07928e-09	1.47164e-07
ENSG00000146648.19	EGFR	HERVH_4q22.3a	0.258415	3.65687e-09	1.48395e-07
ENSG00000146648.19	EGFR	HML5_Xq21.33	-0.258419	3.65492e-09	1.48395e-07
ENSG00000146648.19	EGFR	MER4_Xq21.33a	-0.258359	3.68617e-09	1.48395e-07
ENSG00000105976.16	MET	ERV316A3_3q27.1a	-0.258946	3.38895e-09	1.52395e-07
ENSG00000105976.16	MET	ERVLB4_8p12a	-0.258783	3.46907e-09	1.54355e-07
ENSG00000047936.11	ROS1	PRIMA4_Xp11.22	0.244691	2.46746e-08	1.5779e-07
ENSG00000163599.17	CTLA4	ERVLE_4p12e	0.252151	8.86392e-09	1.64332e-07
ENSG00000157764.14	BRAF	HERVH_9q34.13	0.247277	1.73678e-08	1.64603e-07
ENSG00000157764.14	BRAF	HERVEA_8q11.23b	0.247202	1.75461e-08	1.65552e-07
ENSG00000163599.17	CTLA4	HUERSP1_14q23.1	0.251869	9.21886e-09	1.70167e-07
ENSG00000047936.11	ROS1	HERVH_10q24.2a	0.243918	2.73858e-08	1.73553e-07
ENSG00000163599.17	CTLA4	HML3_4q31.3	0.251626	9.5366e-09	1.75266e-07
ENSG00000188389.11	PDCD1	ERVLE_6p21.32	0.253177	7.67987e-09	1.77393e-07
ENSG00000105976.16	MET	HERV4_8q24.3	0.257737	4.02896e-09	1.774e-07
ENSG00000171094.18	ALK	HERVH_4q22.3a	0.265215	1.36144e-09	1.79838e-07
ENSG00000157764.14	BRAF	HERV9_10p13	0.246521	1.92523e-08	1.80442e-07
ENSG00000120217.14	CD274	HERVL_1p22.2d	0.251942	9.12506e-09	1.84553e-07
ENSG00000188389.11	PDCD1	HERVP71A_12p13.33b	0.2528	8.09578e-09	1.85983e-07
ENSG00000163599.17	CTLA4	MER4_20q13.13	0.251135	1.02101e-08	1.86831e-07
ENSG00000047936.11	ROS1	HERVH_4q13.2	0.243315	2.96975e-08	1.8736e-07
ENSG00000198400.12	NTRK1	HUERSP2_3q26.33	0.249286	1.31846e-08	1.91516e-07
ENSG00000105976.16	MET	MER4B_2q31.1	0.258004	4.42263e-09	1.92727e-07
ENSG00000198400.12	NTRK1	ERVLE_1q32.1e	0.24914	1.34527e-08	1.94742e-07
ENSG00000120217.14	CD274	MER101_1p22.2a	0.251405	9.83397e-09	1.97006e-07
ENSG00000146648.19	EGFR	ERVLB4_6q27e	-0.255801	5.30667e-09	2.03921e-07
ENSG00000198400.12	NTRK1	HERV4_4q12	0.249449	1.4449e-08	2.05643e-07
ENSG00000105976.16	MET	ERVLE_20q13.12c	0.256345	4.91215e-09	2.09447e-07
ENSG00000105976.16	MET	ERVLE_5q12.3a	-0.256316	4.93244e-09	2.09447e-07
ENSG00000105976.16	MET	HERVH_6q14.1e	-0.256284	4.95498e-09	2.09447e-07
ENSG00000047936.11	ROS1	ERVLE_7q31.32f	0.242396	3.3588e-08	2.10647e-07
ENSG00000047936.11	ROS1	ERVLE_4q28.1b	0.242349	3.3799e-08	2.11344e-07
ENSG00000047936.11	ROS1	LTR25_21q22.11	0.24235	3.37952e-08	2.11344e-07
ENSG00000198400.12	NTRK1	HUERSP2_12q21.1	-0.248348	1.50004e-08	2.12774e-07
ENSG00000157764.14	BRAF	HERVK11_19p12b	0.245076	2.34242e-08	2.16661e-07
ENSG00000146648.19	EGFR	HUERSP1_2q31.1a	0.255226	5.75637e-09	2.19209e-07
ENSG00000047936.11	ROS1	ERV316A3_5p14.1b	-0.24203	3.52694e-08	2.19887e-07
ENSG00000047936.11	ROS1	HERVL_21q21.3i	0.241896	3.59028e-08	2.23507e-07
ENSG00000198400.12	NTRK1	HML3_3q26.1a	0.247869	1.6018e-08	2.242e-07
ENSG00000198400.12	NTRK1	ERV316A3_9q34.2a	0.247824	1.61151e-08	2.24336e-07
ENSG00000146648.19	EGFR	HERVH_1p31.3d	0.254751	6.15517e-09	2.30247e-07
ENSG00000047936.11	ROS1	MER34B_11p15.5	-0.241642	3.71409e-08	2.30535e-07
ENSG00000165731.20	RET	HERVI_9q22.1	0.260975	2.52943e-09	2.32433e-07
ENSG00000120217.14	CD274	ERVLB4_Xq21.33a	-0.250114	1.17611e-08	2.33756e-07
ENSG00000198400.12	NTRK1	ERVLE_18q21.1b	0.247488	1.68738e-08	2.33854e-07
ENSG00000198400.12	NTRK1	HERVH_4q35.2a	0.247451	1.69588e-08	2.34264e-07
ENSG00000141736.14	ERBB2	ERVLE_6p25.1a	0.26397	1.63496e-09	2.3831e-07
ENSG00000047936.11	ROS1	PABLB_10p15.1b	-0.241335	3.8692e-08	2.3911e-07
ENSG00000198400.12	NTRK1	ERVLE_3p21.31d	0.247239	1.74573e-08	2.40364e-07
ENSG00000157168.20	NRG1	HERVH_3p22.3b	0.273318	4.04286e-10	2.44131e-07
ENSG00000171094.18	ALK	MER4B_12p13.31c	0.262902	1.91137e-09	2.4483e-07
ENSG00000047936.11	ROS1	HERVL_4q24d	0.241099	3.99251e-08	2.4637e-07
ENSG00000105976.16	MET	MER41_9q22.32	0.255043	5.9072e-09	2.47225e-07
ENSG00000047936.11	ROS1	MER4B_9p13.3	0.240937	4.07929e-08	2.50992e-07
ENSG00000198400.12	NTRK1	HERVH_3q26.1b	-0.246889	1.83124e-08	2.5132e-07
ENSG00000146648.19	EGFR	HERVH_4q21.3	0.253963	6.87802e-09	2.5503e-07
ENSG00000047936.11	ROS1	HERVEA_19p13.2	0.240769	4.17145e-08	2.5629e-07
ENSG00000165731.20	RET	ERVLE_3q26.1a	0.260091	2.87398e-09	2.58475e-07
ENSG00000198400.12	NTRK1	HERVH_6p21.32	0.246566	1.91354e-08	2.60104e-07
ENSG00000146648.19	EGFR	HERVE_19p12	0.253583	7.25465e-09	2.64357e-07
ENSG00000165731.20	RET	HERVK11D_5p13.2	0.259764	3.01263e-09	2.653e-07
ENSG00000165731.20	RET	HERVL18_3p21.31a	0.259486	3.13547e-09	2.70482e-07
ENSG00000120217.14	CD274	HML3_Xq21.1a	0.248926	1.38549e-08	2.72394e-07
ENSG00000047936.11	ROS1	ERVLE_8p22a	0.240286	4.44719e-08	2.72439e-07
ENSG00000198400.12	NTRK1	MER61_6q24.1b	0.246178	2.01736e-08	2.73313e-07
ENSG00000120217.14	CD274	ERV316A3_5q35.3c	0.248824	1.40502e-08	2.74214e-07
ENSG00000120217.14	CD274	HERVL18_6q14.1	-0.248777	1.41421e-08	2.74214e-07
ENSG00000120217.14	CD274	HML2_10p14	0.248805	1.40862e-08	2.74214e-07
ENSG00000198400.12	NTRK1	MER4_8q24.3b	0.246804	2.0658e-08	2.78982e-07
ENSG00000165731.20	RET	HERVH_3q26.1a	0.25893	3.39667e-09	2.87154e-07
ENSG00000133703.13	KRAS	HERVKC4_1q22	0.269238	7.48813e-10	2.87748e-07
ENSG00000198400.12	NTRK1	ERVLE_5q31.1d	0.245719	2.14696e-08	2.89019e-07
ENSG00000105976.16	MET	ERVLE_17q24.1	0.25379	7.04685e-09	2.89194e-07
ENSG00000146648.19	EGFR	MER4_8q24.3c	0.252748	8.15409e-09	2.92096e-07
ENSG00000198400.12	NTRK1	ERV316A3_9q34.3b	0.245601	2.18174e-08	2.92769e-07
ENSG00000157764.14	BRAF	HERVL40_Xp11.21b	0.243396	3.25537e-08	2.95288e-07
ENSG00000198400.12	NTRK1	ERV316A3_6p21.2a	0.245514	2.20752e-08	2.9529e-07
ENSG00000146648.19	EGFR	MER4_5p12b	0.2525	8.44215e-09	2.99874e-07
ENSG00000120217.14	CD274	HERVH_5q23.2f	-0.247959	1.58213e-08	3.05374e-07
ENSG00000163599.17	CTLA4	HML2_6q25.1	0.247207	1.75342e-08	3.11415e-07
ENSG00000105976.16	MET	LTR25_3p22.1	-0.253165	7.69268e-09	3.12663e-07
ENSG00000146648.19	EGFR	ERVLE_4q24g	0.252027	9.01776e-09	3.15025e-07
ENSG00000163599.17	CTLA4	ERVLB4_15q13.3a	0.247001	1.80337e-08	3.18948e-07
ENSG00000198400.12	NTRK1	HERVH_4q13.3	0.244615	2.49285e-08	3.3136e-07
ENSG00000157764.14	BRAF	HERVH_13q33.3	-0.241579	3.74531e-08	3.34702e-07
ENSG00000165731.20	RET	ERVLE_8p23.1b	0.257468	4.18684e-09	3.35242e-07
ENSG00000165731.20	RET	HUERSP3B_Xq21.33	0.257309	4.28273e-09	3.35242e-07
ENSG00000188389.11	PDCD1	ERVLB4_9q22.2b	0.24841	1.4873e-08	3.36194e-07
ENSG00000047936.11	ROS1	ERVLB4_8p12a	-0.238548	5.59328e-08	3.39777e-07
ENSG00000047936.11	ROS1	HERVKC4_6p22.1	0.238546	5.59462e-08	3.39777e-07
ENSG00000120217.14	CD274	ERVLE_4p12e	0.247053	1.79077e-08	3.40973e-07
ENSG00000047936.11	ROS1	MER4_7q31.1a	-0.238482	5.64189e-08	3.42156e-07
ENSG00000157764.14	BRAF	MER4_19p12a	0.241358	3.85753e-08	3.44004e-07
ENSG00000047936.11	ROS1	ERV316A3_12p12.3a	0.238394	5.70739e-08	3.45632e-07
ENSG00000047936.11	ROS1	PABLB_1q31.3a	0.238302	5.77712e-08	3.49355e-07
ENSG00000165731.20	RET	ERV316A3_13q14.13	0.256704	4.66812e-09	3.53291e-07
ENSG00000165731.20	RET	HERVL18_6q14.1	0.256686	4.68045e-09	3.53291e-07
ENSG00000157764.14	BRAF	HERVFRD_6q22.31	0.241117	3.98271e-08	3.53674e-07
ENSG00000120217.14	CD274	HARLEQUIN_Xq23b	-0.246528	1.92357e-08	3.64615e-07
ENSG00000141736.14	ERBB2	MER34B_7q11.23a	0.260799	2.5947e-09	3.65594e-07
ENSG00000157764.14	BRAF	HERVH_3q21.3d	0.240816	4.14533e-08	3.6581e-07
ENSG00000157764.14	BRAF	HERVE_9q34.3	0.240722	4.19766e-08	3.69657e-07
ENSG00000163599.17	CTLA4	MER41_22q12.3c	0.245852	2.10852e-08	3.69823e-07
ENSG00000198400.12	NTRK1	ERV316A3_8q11.23b	0.243659	2.83569e-08	3.74576e-07
ENSG00000198400.12	NTRK1	HARLEQUIN_2q32.1	0.243626	2.84813e-08	3.75048e-07
ENSG00000157764.14	BRAF	HUERSP3_1q42.12	-0.241298	4.29313e-08	3.75716e-07
ENSG00000047936.11	ROS1	HML3_3q26.1a	0.237687	6.26225e-08	3.77073e-07
ENSG00000157764.14	BRAF	HML2_6q25.1	0.24018	4.51021e-08	3.92277e-07
ENSG00000146648.19	EGFR	MER61_6q14.1f	0.250357	1.13721e-08	3.94016e-07
ENSG00000120217.14	CD274	ERV316A3_6p22.1n	0.2467	2.09491e-08	3.9532e-07
ENSG00000198400.12	NTRK1	ERV316A3_5q14.3a	0.243175	3.02572e-08	3.97196e-07
ENSG00000157764.14	BRAF	HML5_12q21.32	0.240032	4.59927e-08	3.98383e-07
ENSG00000157764.14	BRAF	HUERSP1_8q13.3	0.240041	4.59386e-08	3.98383e-07
ENSG00000163599.17	CTLA4	MER4_1q21.2	0.245238	2.29156e-08	4.00266e-07
ENSG00000141736.14	ERBB2	HERVEA_19q13.33	0.259753	3.01725e-09	4.01964e-07
ENSG00000171094.18	ALK	ERVLE_1p13.3b	0.259064	3.33156e-09	4.02357e-07
ENSG00000120217.14	CD274	ERV316A3_2q22.3c	0.245624	2.17478e-08	4.08568e-07
ENSG00000157764.14	BRAF	MER41_Xq13.3b	0.239783	4.75307e-08	4.10025e-07
ENSG00000047936.11	ROS1	ERV316A3_18p11.32c	-0.236991	6.85845e-08	4.10052e-07
ENSG00000105976.16	MET	HERVH_19p13.12	0.251077	1.02923e-08	4.10429e-07
ENSG00000047936.11	ROS1	ERV316A3_2q32.2c	0.236847	6.98897e-08	4.16677e-07
ENSG00000198400.12	NTRK1	ERV316A3_1p36.22a	0.24271	3.22065e-08	4.17597e-07
ENSG00000120217.14	CD274	LTR25_12p11.22b	0.245364	2.25282e-08	4.21357e-07
ENSG00000157764.14	BRAF	HERVEA_3q25.32	0.239518	4.92226e-08	4.22895e-07
ENSG00000198400.12	NTRK1	ERVLB4_13q34b	0.242551	3.28967e-08	4.25243e-07
ENSG00000120217.14	CD274	ERV316A3_12q24.13	0.245216	2.29843e-08	4.27993e-07
ENSG00000047936.11	ROS1	HERVW_3q25.1a	0.236591	7.22611e-08	4.29603e-07
ENSG00000198400.12	NTRK1	HERVL40_7q21.12b	0.243096	3.38724e-08	4.32563e-07
ENSG00000198400.12	NTRK1	ERV316A3_3p21.31c	0.242126	3.48178e-08	4.40643e-07
ENSG00000120217.14	CD274	HML5_8p21.2	0.24493	2.38902e-08	4.40978e-07
ENSG00000120217.14	CD274	HML5_Xq21.33	-0.244962	2.37865e-08	4.40978e-07
ENSG00000047936.11	ROS1	HARLEQUIN_5q14.2	0.237024	7.4867e-08	4.4447e-07
ENSG00000120217.14	CD274	HERVH_1q42.2e	-0.244801	2.43093e-08	4.46762e-07
ENSG00000120217.14	CD274	HERVL_11q12.1c	0.2446	2.49785e-08	4.57073e-07
ENSG00000198400.12	NTRK1	ERVLB4_9q31.3	0.241811	3.63161e-08	4.58234e-07
ENSG00000133703.13	KRAS	ERVLE_12p11.23	0.265938	1.42047e-09	4.61871e-07
ENSG00000047936.11	ROS1	HUERSP1_8q13.3	0.235985	7.81841e-08	4.63512e-07
ENSG00000047936.11	ROS1	LTR23_4p16.3b	-0.235845	7.96214e-08	4.70056e-07
ENSG00000141736.14	ERBB2	HARLEQUIN_7q22.1	0.259321	3.67203e-09	4.70354e-07
ENSG00000157764.14	BRAF	HARLEQUIN_Xq11.1	0.238562	5.58304e-08	4.73886e-07
ENSG00000157764.14	BRAF	HERVIP10FH_6q22.1	0.238449	5.66669e-08	4.80022e-07
ENSG00000198400.12	NTRK1	HERV9_Xq23b	0.241384	3.8438e-08	4.80703e-07
ENSG00000141736.14	ERBB2	HERVIP10F_14q11.2c	0.258011	3.87438e-09	4.81677e-07
ENSG00000047936.11	ROS1	HERVFRD_6q22.31	0.235496	8.33037e-08	4.89743e-07
ENSG00000120217.14	CD274	MER4B_7q33a	0.243709	2.81645e-08	5.08767e-07
ENSG00000120217.14	CD274	MER4_5p13.2b	0.243628	2.84743e-08	5.12175e-07
ENSG00000163599.17	CTLA4	HARLEQUIN_4q13.2a	0.243283	2.98229e-08	5.14536e-07
ENSG00000163599.17	CTLA4	HERVL18_3p21.31b	0.243228	3.00438e-08	5.16241e-07
ENSG00000047936.11	ROS1	HUERSP2_3q21.3	0.234963	8.92602e-08	5.21136e-07
ENSG00000047936.11	ROS1	ERV316A3_1p36.22a	0.234873	9.0311e-08	5.25819e-07
ENSG00000198400.12	NTRK1	HERVE_9q34.3	0.240628	4.25035e-08	5.28418e-07
ENSG00000120217.14	CD274	ERV316A3_20q13.33b	0.244037	2.99007e-08	5.31052e-07
ENSG00000157764.14	BRAF	ERV316A3_6p25.3a	0.237555	6.37086e-08	5.34318e-07
ENSG00000198400.12	NTRK1	HERVL_1p31.1d	0.240395	4.38327e-08	5.41757e-07
ENSG00000047936.11	ROS1	HERVIP10F_14q11.2c	0.234623	9.32691e-08	5.42295e-07
ENSG00000047936.11	ROS1	ERV316A3_3q27.3e	0.234607	9.34645e-08	5.42685e-07
ENSG00000120217.14	CD274	HUERSP3B_3q13.11	0.243017	3.09076e-08	5.46638e-07
ENSG00000163599.17	CTLA4	HERVH_3q13.2	0.242743	3.20612e-08	5.48676e-07
ENSG00000157764.14	BRAF	HERVH_6q23.1	0.237288	6.59779e-08	5.51163e-07
ENSG00000157764.14	BRAF	MER4_21q22.3a	0.237175	6.69533e-08	5.57109e-07
ENSG00000146648.19	EGFR	MER41_6q14.1e	0.247671	1.64567e-08	5.65548e-07
ENSG00000157764.14	BRAF	HERVL_9p21.3a	0.236991	6.85871e-08	5.69583e-07
ENSG00000120217.14	CD274	HERVL_3p13b	0.24258	3.27696e-08	5.7476e-07
ENSG00000120217.14	CD274	HERVH_18q22.3b	-0.242489	3.31711e-08	5.79398e-07
ENSG00000105976.16	MET	HERVL40_14q13.1b	-0.248333	1.50295e-08	5.8284e-07
ENSG00000105976.16	MET	HARLEQUIN_12p13.32	-0.248265	1.51714e-08	5.82996e-07
ENSG00000171094.18	ALK	HML6_11p15.4	0.256216	5.00323e-09	5.87463e-07
ENSG00000105976.16	MET	ERVLE_7q34a	0.248098	1.55225e-08	5.91113e-07
ENSG00000198400.12	NTRK1	HERV4_11q21	0.239679	4.81924e-08	5.92178e-07
ENSG00000198400.12	NTRK1	HML3_3q13.11b	0.239344	5.03684e-08	6.15819e-07
ENSG00000198400.12	NTRK1	HERVEA_19p13.3	0.23931	5.0598e-08	6.16362e-07
ENSG00000165731.20	RET	HERVL18_3p21.31b	0.251831	9.26814e-09	6.42236e-07
ENSG00000047936.11	ROS1	HERVH_1q41g	0.233265	1.11087e-07	6.4236e-07
ENSG00000141736.14	ERBB2	MER101_2q13b	0.254476	6.3987e-09	6.5969e-07
ENSG00000165731.20	RET	HUERSP3_11p15.1	0.252303	9.77979e-09	6.66761e-07
ENSG00000047936.11	ROS1	HERVL_Xq21.33d	0.232903	1.16369e-07	6.71984e-07
ENSG00000171094.18	ALK	HERVIP10FH_2q14.2	0.255019	5.92712e-09	6.77133e-07
ENSG00000157764.14	BRAF	HML2_11q23.3	0.23551	8.31518e-08	6.81168e-07
ENSG00000047936.11	ROS1	MER4_4q25b	0.232754	1.18616e-07	6.84027e-07
ENSG00000047936.11	ROS1	MER4_15q22.31a	0.232741	1.18802e-07	6.84163e-07
ENSG00000120217.14	CD274	HERVFH21_Xq11.2b	0.240989	4.0512e-08	6.95003e-07
ENSG00000165731.20	RET	HERVL40_11q13.4b	0.25077	1.07405e-08	7.09379e-07
ENSG00000163599.17	CTLA4	ERVLB4_9q22.2b	0.240558	4.28956e-08	7.22389e-07
ENSG00000157764.14	BRAF	MER61_6q14.1f	0.235006	8.87644e-08	7.22942e-07
ENSG00000188389.11	PDCD1	ERVLB4_15q13.3a	0.242596	3.2699e-08	7.27467e-07
ENSG00000198400.12	NTRK1	MER41_17q23.3a	0.237949	6.05086e-08	7.28689e-07
ENSG00000198400.12	NTRK1	HML6_19q13.41f	0.237815	6.15783e-08	7.39464e-07
ENSG00000171094.18	ALK	ERVLE_1p31.1k	0.254194	6.65746e-09	7.40555e-07
ENSG00000157764.14	BRAF	HERVH_19q13.32c	0.234763	9.16021e-08	7.41767e-07
ENSG00000157764.14	BRAF	ERVLE_2q21.2a	0.234658	9.28529e-08	7.50458e-07
ENSG00000105976.16	MET	MER61_6q24.1b	0.246208	2.00908e-08	7.51538e-07
ENSG00000047936.11	ROS1	HERVE_20p11.21b	0.232588	1.31888e-07	7.54463e-07
ENSG00000171094.18	ALK	HERV3_19q13.33	0.253778	7.05848e-09	7.6503e-07
ENSG00000120217.14	CD274	HERVH_6q14.1e	-0.24014	4.53415e-08	7.69712e-07
ENSG00000120217.14	CD274	HUERSP1_20p12.3	-0.240094	4.56201e-08	7.71344e-07
ENSG00000198400.12	NTRK1	MER61_5q23.2b	0.237406	6.4969e-08	7.72951e-07
ENSG00000120217.14	CD274	HERVH_9p21.3a	0.239953	4.64755e-08	7.76573e-07
ENSG00000157764.14	BRAF	ERVLB4_7q36.3a	0.234088	9.99398e-08	8.03128e-07
ENSG00000171094.18	ALK	ERVLE_1p35.2b	0.25314	7.71927e-09	8.15734e-07
ENSG00000198400.12	NTRK1	HML2_14q32.33	0.23687	6.96735e-08	8.22653e-07
ENSG00000120217.14	CD274	HERVL_12p13.1c	0.240089	5.02951e-08	8.36997e-07
ENSG00000120217.14	CD274	ERVLE_17q24.1	0.239303	5.06421e-08	8.39467e-07
ENSG00000047936.11	ROS1	HARLEQUIN_Xq11.1	0.230993	1.48485e-07	8.43608e-07
ENSG00000120217.14	CD274	HERVIP10FH_14q12	0.239232	5.11148e-08	8.43993e-07
ENSG00000120217.14	CD274	PABLB_20p12.3	-0.239188	5.14157e-08	8.45658e-07
ENSG00000198400.12	NTRK1	HERVL40_Xp11.21b	0.23724	7.28096e-08	8.54906e-07
ENSG00000141736.14	ERBB2	HML6_7p13	0.253199	8.64366e-09	8.69923e-07
ENSG00000120217.14	CD274	MER4_Xq21.31c	0.239567	5.38458e-08	8.78788e-07
ENSG00000146648.19	EGFR	ERVLE_20q13.12c	0.244159	2.65118e-08	8.82404e-07
ENSG00000163599.17	CTLA4	HERVE_20p11.21b	-0.239523	5.41495e-08	8.90622e-07
ENSG00000105976.16	MET	ERV316A3_4q31.23c	0.244749	2.44831e-08	8.92154e-07
ENSG00000198400.12	NTRK1	ERVLE_7q34a	0.236093	7.70996e-08	8.9533e-07
ENSG00000163599.17	CTLA4	ERVLB4_8q24.3d	-0.239443	5.47209e-08	8.96533e-07
ENSG00000157764.14	BRAF	HERVL_13q33.3	-0.233072	1.13881e-07	8.99766e-07
ENSG00000165731.20	RET	MER41_6q14.1a	0.248807	1.40833e-08	9.01969e-07
ENSG00000047936.11	ROS1	ERVLB4_Xq21.2	-0.230253	1.63081e-07	9.24054e-07
ENSG00000146648.19	EGFR	HERVL_14q22.3b	-0.243573	2.86867e-08	9.32758e-07
ENSG00000146648.19	EGFR	LTR23_9q22.33b	0.243609	2.85468e-08	9.32758e-07
ENSG00000165731.20	RET	ERVLB4_8p12a	0.248332	1.50334e-08	9.48448e-07
ENSG00000047936.11	ROS1	HARLEQUIN_11q22.1b	0.229885	1.70858e-07	9.64242e-07
ENSG00000047936.11	ROS1	HERVH_6q11.1a	0.22986	1.71413e-07	9.64796e-07
ENSG00000047936.11	ROS1	HERVW_5p13.2a	0.229622	1.76636e-07	9.88927e-07
ENSG00000047936.11	ROS1	HARLEQUIN_1p13.2b	0.229494	1.79503e-07	1.00232e-06
ENSG00000163599.17	CTLA4	MER41_22q12.3e	0.238491	6.19306e-08	1.00299e-06
ENSG00000146648.19	EGFR	HERVL_12p13.1c	0.243603	3.16726e-08	1.00662e-06
ENSG00000157764.14	BRAF	HUERSP3_1q23.3	0.232131	1.28452e-07	1.00736e-06
ENSG00000198400.12	NTRK1	HERVH_8q24.21b	-0.23505	8.82611e-08	1.01106e-06
ENSG00000047936.11	ROS1	HERVE_2q37.1	0.229961	1.83461e-07	1.02307e-06
ENSG00000157168.20	NRG1	ERV316A3_4q31.23c	0.26107	2.49464e-09	1.02477e-06
ENSG00000157168.20	NRG1	HERVH_13q33.3	0.260609	2.66678e-09	1.02477e-06
ENSG00000157168.20	NRG1	HERVS71_7q33	0.261341	2.39855e-09	1.02477e-06
ENSG00000047936.11	ROS1	HERV9_3p24.3	0.229273	1.84583e-07	1.02662e-06
ENSG00000198400.12	NTRK1	ERV316A3_2p16.1a	0.235598	8.99183e-08	1.02726e-06
ENSG00000047936.11	ROS1	HERVH_5q23.2e	0.229256	1.84979e-07	1.02747e-06
ENSG00000047936.11	ROS1	MER41_19q13.43a	0.229804	1.871e-07	1.03789e-06
ENSG00000120217.14	CD274	ERV316A3_3q13.13d	0.237436	6.47094e-08	1.04002e-06
ENSG00000047936.11	ROS1	LTR57_5p12b	0.229036	1.90181e-07	1.0509e-06
ENSG00000157764.14	BRAF	HUERSP3B_9p13.3b	0.231758	1.34706e-07	1.0525e-06
ENSG00000198400.12	NTRK1	ERVLB4_19q13.12	0.235343	9.2901e-08	1.05562e-06
ENSG00000146648.19	EGFR	ERVLE_2q36.3b	0.242182	3.45581e-08	1.09013e-06
ENSG00000198400.12	NTRK1	HERVL_7q11.21b	0.234312	9.70855e-08	1.09435e-06
ENSG00000146648.19	EGFR	HERVW_5p13.2a	0.242047	3.51894e-08	1.10182e-06
ENSG00000120217.14	CD274	HUERSP3B_2q35	-0.236908	6.93298e-08	1.11006e-06
ENSG00000198400.12	NTRK1	HML3_10q11.21b	0.234178	9.87876e-08	1.11057e-06
ENSG00000157764.14	BRAF	HERVW_Xq22.3c	0.231225	1.44165e-07	1.11405e-06
ENSG00000157764.14	BRAF	HERVEA_19p12a	0.231188	1.4484e-07	1.11722e-06
ENSG00000157764.14	BRAF	HERVIP10FH_15q25.1	0.231811	1.45462e-07	1.11998e-06
ENSG00000188389.11	PDCD1	ERV316A3_6p22.1p	-0.239049	5.23645e-08	1.12358e-06
ENSG00000188389.11	PDCD1	PRIMA4_Xp11.22	0.239057	5.23092e-08	1.12358e-06
ENSG00000120217.14	CD274	HML4_10p15.1	-0.236741	7.08601e-08	1.13028e-06
ENSG00000157764.14	BRAF	ERV316A3_2p16.1a	0.231711	1.47305e-07	1.13211e-06
ENSG00000105976.16	MET	ERVLE_2q14.1b	0.242786	3.188e-08	1.13241e-06
ENSG00000163599.17	CTLA4	ERVLE_1p13.3b	0.236743	7.08431e-08	1.13429e-06
ENSG00000047936.11	ROS1	ERV316A3_Xp22.11	-0.228298	2.08664e-07	1.14847e-06
ENSG00000163599.17	CTLA4	HML6_19p13.2d	0.236558	7.25653e-08	1.14881e-06
ENSG00000188389.11	PDCD1	HERVFRD_14q11.2	-0.238731	5.46002e-08	1.15978e-06
ENSG00000198400.12	NTRK1	MER4_3q29c	0.233793	1.03808e-07	1.16309e-06
ENSG00000198400.12	NTRK1	MER61_4q31.21b	0.233777	1.0401e-07	1.16309e-06
ENSG00000171094.18	ALK	HERVH_6q23.2c	0.250017	1.19191e-08	1.17168e-06
ENSG00000165731.20	RET	HERVL_4p15.2c	0.246223	2.00488e-08	1.19361e-06
ENSG00000157168.20	NRG1	HERVW_1p33c	0.258854	3.43362e-09	1.20949e-06
ENSG00000047936.11	ROS1	HERVH_21q22.2	0.227832	2.21209e-07	1.21593e-06
ENSG00000146648.19	EGFR	MER4_14q32.33a	0.241125	3.97856e-08	1.21865e-06
ENSG00000141736.14	ERBB2	HERVH_7p21.1a	0.249219	1.33071e-08	1.22281e-06
ENSG00000141736.14	ERBB2	PRIMA41_10p15.3	0.249356	1.30591e-08	1.22281e-06
ENSG00000146648.19	EGFR	HERVH_3q26.31c	0.241027	4.03073e-08	1.22575e-06
ENSG00000157168.20	NRG1	ERV316A3_12p12.3a	0.258189	3.77696e-09	1.22809e-06
ENSG00000047936.11	ROS1	HERVH_1q24.2	0.227712	2.2456e-07	1.23274e-06
ENSG00000198400.12	NTRK1	HERVIP10FH_6q22.1	0.233164	1.12536e-07	1.24853e-06
ENSG00000198400.12	NTRK1	HERVW_7q21.2	0.233102	1.13431e-07	1.25516e-06
ENSG00000165731.20	RET	HML2_14q32.33	0.245695	2.15398e-08	1.26457e-06
ENSG00000157764.14	BRAF	MER41_9q31.1a	0.230125	1.65757e-07	1.2693e-06
ENSG00000047936.11	ROS1	MER4_6p22.3d	0.227407	2.33288e-07	1.27569e-06
ENSG00000105976.16	MET	MER34B_4q31.3	0.241613	3.72843e-08	1.30429e-06
ENSG00000198400.12	NTRK1	ERVLE_7q21.2	0.232722	1.19103e-07	1.31106e-06
ENSG00000157764.14	BRAF	ERVLE_1p36.13b	0.2298	1.72708e-07	1.31301e-06
ENSG00000165731.20	RET	ERVLB4_Xq21.33c	0.245138	2.32265e-08	1.32674e-06
ENSG00000146648.19	EGFR	HERVIP10F_3p25.3	0.240204	4.49577e-08	1.34217e-06
ENSG00000146648.19	EGFR	HERVL_3q25.32	0.240182	4.50882e-08	1.34217e-06
ENSG00000198400.12	NTRK1	HERV4_12p11.21	0.232472	1.22968e-07	1.34659e-06
ENSG00000120217.14	CD274	HERVFH19_13q34	0.23527	8.57874e-08	1.35617e-06
ENSG00000198400.12	NTRK1	HERVL40_22q11.23	0.232382	1.24394e-07	1.35869e-06
ENSG00000146648.19	EGFR	HERVE_5q14.3c	0.240758	4.60813e-08	1.36214e-06
ENSG00000157764.14	BRAF	ERVLE_4p12e	0.229425	1.81073e-07	1.36678e-06
ENSG00000157764.14	BRAF	ERV316A3_9q34.3b	0.229202	1.86246e-07	1.40332e-06
ENSG00000047936.11	ROS1	HERVL18_Xq24	0.226609	2.57728e-07	1.40389e-06
ENSG00000047936.11	ROS1	MER41_11p15.5b	-0.226552	2.59538e-07	1.41193e-06
ENSG00000105976.16	MET	MER41_6q14.1a	-0.240811	4.14834e-08	1.41411e-06
ENSG00000157764.14	BRAF	ERVLE_4q21.23a	0.229089	1.88902e-07	1.4208e-06
ENSG00000105976.16	MET	ERVLE_2q36.3b	0.240666	4.22886e-08	1.43003e-06
ENSG00000141736.14	ERBB2	HUERSP3_11p15.1	-0.248293	1.69018e-08	1.4311e-06
ENSG00000120217.14	CD274	HERVL_Xq21.33a	-0.234741	9.18633e-08	1.44352e-06
ENSG00000165731.20	RET	LTR25_3p22.1	0.24437	2.57665e-08	1.4522e-06
ENSG00000198400.12	NTRK1	HARLEQUIN_11q22.1b	0.231735	1.351e-07	1.47183e-06
ENSG00000188389.11	PDCD1	HERVH_12p11.22a	0.236767	7.06205e-08	1.48514e-06
ENSG00000165731.20	RET	HERV9_5q31.2	0.244085	2.67741e-08	1.48913e-06
ENSG00000198400.12	NTRK1	HML2_7q22.2	0.231337	1.42131e-07	1.52497e-06
ENSG00000198400.12	NTRK1	HUERSP3B_11p12	0.231299	1.42815e-07	1.52497e-06
ENSG00000198400.12	NTRK1	MER41_1q44b	0.2313	1.42796e-07	1.52497e-06
ENSG00000157764.14	BRAF	HML1_1q23.3	0.228452	2.04675e-07	1.52586e-06
ENSG00000163599.17	CTLA4	MER34B_7q36.1	0.234136	9.93215e-08	1.5435e-06
ENSG00000146648.19	EGFR	MER101_1p31.3	0.238452	5.66419e-08	1.56487e-06
ENSG00000047936.11	ROS1	HERV3_1p34.3	0.225644	2.90552e-07	1.57255e-06
ENSG00000163599.17	CTLA4	HERV9_17q22a	0.233937	1.01891e-07	1.57763e-06
ENSG00000171094.18	ALK	HUERSP1_11p15.4b	0.247418	1.70368e-08	1.57965e-06
ENSG00000047936.11	ROS1	HERVH_4q31.1a	0.225597	2.92252e-07	1.57973e-06
ENSG00000157764.14	BRAF	HERVIP10FH_17q21.32	0.228143	2.1276e-07	1.58056e-06
ENSG00000105976.16	MET	MER4_14q12b	-0.239845	4.71439e-08	1.58157e-06
ENSG00000047936.11	ROS1	HERVL18_3p21.31b	0.225302	3.03093e-07	1.63624e-06
ENSG00000047936.11	ROS1	MER4_14q32.33a	0.225251	3.05011e-07	1.64449e-06
ENSG00000047936.11	ROS1	ERVLE_17p11.2c	0.225779	3.07892e-07	1.65791e-06
ENSG00000198400.12	NTRK1	MER4_7p14.3b	0.230577	1.56534e-07	1.65832e-06
ENSG00000165731.20	RET	HERVH_6q25.2a	0.242901	3.13901e-08	1.65857e-06
ENSG00000157764.14	BRAF	MER101_15q12	0.227713	2.24532e-07	1.66217e-06
ENSG00000198400.12	NTRK1	HERVEA_6q22.31	0.230463	1.58812e-07	1.67825e-06
ENSG00000157764.14	BRAF	MER4B_9p13.3	0.227518	2.30092e-07	1.69677e-06
ENSG00000171094.18	ALK	HERVH_8q22.1a	0.246627	1.89761e-08	1.70664e-06
ENSG00000157764.14	BRAF	MER4B_1p36.33	0.227385	2.33936e-07	1.71675e-06
ENSG00000198400.12	NTRK1	ERVLE_3q26.1a	-0.23016	1.65013e-07	1.73717e-06
ENSG00000157764.14	BRAF	HERVIP10FH_2p14	0.227259	2.37638e-07	1.73788e-06
ENSG00000165731.20	RET	HERVH_3q26.1b	0.242293	3.40511e-08	1.75529e-06
ENSG00000163599.17	CTLA4	HERVL_1p21.3b	0.233044	1.14289e-07	1.76313e-06
ENSG00000198400.12	NTRK1	HERVH_12p13.31d	0.230006	1.68261e-07	1.76487e-06
ENSG00000047936.11	ROS1	LTR57_14q32.33a	0.224623	3.29626e-07	1.76594e-06
ENSG00000047936.11	ROS1	ERV316A3_21q22.3e	0.224588	3.31064e-07	1.7714e-06
ENSG00000198400.12	NTRK1	HERV9_3p24.3	0.229883	1.70903e-07	1.78814e-06
ENSG00000146648.19	EGFR	HERVL40_18q22.1a	-0.237305	6.58291e-08	1.79522e-06
ENSG00000171094.18	ALK	HERV9_7p14.2	0.245606	2.18025e-08	1.80218e-06
ENSG00000171094.18	ALK	HERVIP10FH_Xq24	0.24573	2.14375e-08	1.80218e-06
ENSG00000157764.14	BRAF	HERVH_3q11.1	0.226886	2.48975e-07	1.81765e-06
ENSG00000047936.11	ROS1	HARLEQUIN_7q32.1a	-0.224315	3.42404e-07	1.82976e-06
ENSG00000198400.12	NTRK1	HARLEQUIN_4q32.1	0.229641	1.762e-07	1.83447e-06
ENSG00000165731.20	RET	HERVH_1p31.1a	-0.242589	3.62236e-08	1.84252e-06
ENSG00000165731.20	RET	PABLA_7q32.1	-0.241749	3.66151e-08	1.84252e-06
ENSG00000047936.11	ROS1	ERVLE_2p13.2a	0.224143	3.4975e-07	1.86431e-06
ENSG00000171094.18	ALK	ERVLE_11q23.3c	0.245065	2.34595e-08	1.87101e-06
ENSG00000105976.16	MET	HERVP71A_10q25.1	0.238411	5.69461e-08	1.88056e-06
ENSG00000171094.18	ALK	LTR25_12p11.22b	0.244856	2.41317e-08	1.88898e-06
ENSG00000120217.14	CD274	HUERSP3B_Xq21.33	-0.232516	1.22272e-07	1.89321e-06
ENSG00000165731.20	RET	ERV316A3_3q27.1a	0.241425	3.82294e-08	1.90113e-06
ENSG00000198400.12	NTRK1	ERVLB4_4q23b	0.229913	1.84583e-07	1.90766e-06
ENSG00000171094.18	ALK	MER4_12q12a	0.244502	2.53111e-08	1.94527e-06
ENSG00000198400.12	NTRK1	HML1_6q22.32	0.228865	1.94316e-07	1.99362e-06
ENSG00000047936.11	ROS1	HERVL66_19p12b	0.223555	3.75928e-07	1.99378e-06
ENSG00000157764.14	BRAF	ERV316A3_18q22.3e	0.226005	2.77796e-07	2.01069e-06
ENSG00000157764.14	BRAF	MER4_4p12c	0.225984	2.78521e-07	2.0125e-06
ENSG00000146648.19	EGFR	HERVL66_19p12g	0.236362	7.4446e-08	2.0172e-06
ENSG00000047936.11	ROS1	ERV316A3_6p22.1k	0.223423	3.82092e-07	2.02394e-06
ENSG00000047936.11	ROS1	HARLEQUIN_7q22.1	0.223922	3.86263e-07	2.04347e-06
ENSG00000157764.14	BRAF	HERVW_2q12.2	0.225809	2.84658e-07	2.05332e-06
ENSG00000047936.11	ROS1	HERVH_3q21.3a	0.22324	3.90758e-07	2.06467e-06
ENSG00000198400.12	NTRK1	HML6_4q21.1	0.228323	2.08016e-07	2.11367e-06
ENSG00000171094.18	ALK	HERVEA_12p13.31	0.243616	2.8518e-08	2.11484e-06
ENSG00000198400.12	NTRK1	HERVFRD_3p21.31	0.228232	2.10406e-07	2.13282e-06
ENSG00000171094.18	ALK	HERVH_6p22.3d	0.243255	2.99366e-08	2.18176e-06
ENSG00000198400.12	NTRK1	ERV316A3_6p22.1m	0.227744	2.23658e-07	2.25633e-06
ENSG00000198400.12	NTRK1	HARLEQUIN_20p12.1	0.227677	2.25559e-07	2.2647e-06
ENSG00000141736.14	ERBB2	HERVK11_19p12b	0.243931	2.73349e-08	2.26558e-06
ENSG00000198400.12	NTRK1	MER101_1p35.2	0.227527	2.29811e-07	2.30192e-06
ENSG00000157168.20	NRG1	ERV316A3_6p21.33b	0.253124	7.73676e-09	2.30217e-06
ENSG00000157168.20	NRG1	HERVK11_18q21.1	0.252735	8.16953e-09	2.30217e-06
ENSG00000157764.14	BRAF	HERVH_9q21.33c	0.224764	3.2395e-07	2.31206e-06
ENSG00000157764.14	BRAF	HERVL_1p31.1d	0.224754	3.24355e-07	2.31206e-06
ENSG00000157764.14	BRAF	HERV4_4q12	-0.225261	3.28059e-07	2.33452e-06
ENSG00000120217.14	CD274	HERVH_12p11.22a	0.230796	1.52235e-07	2.34854e-06
ENSG00000188389.11	PDCD1	MER4_1q21.2	0.233016	1.14695e-07	2.37654e-06
ENSG00000105976.16	MET	LTR57_5p12a	0.236259	7.54477e-08	2.37998e-06
ENSG00000133703.13	KRAS	HERVL18_5q21.2	0.25079	1.07098e-08	2.38266e-06
ENSG00000198400.12	NTRK1	HARLEQUIN_6q23.1	0.227174	2.40179e-07	2.39443e-06
ENSG00000198400.12	NTRK1	HERVL_11q12.1c	0.227123	2.41732e-07	2.40424e-06
ENSG00000047936.11	ROS1	MER101_7q36.1a	-0.222487	4.59665e-07	2.40471e-06
ENSG00000157764.14	BRAF	HML5_1q22	0.224956	3.40504e-07	2.40688e-06
ENSG00000047936.11	ROS1	ERVLB4_11p15.5d	0.221878	4.61514e-07	2.4114e-06
ENSG00000165731.20	RET	HERVH_1q42.2e	0.239379	5.0134e-08	2.43582e-06
ENSG00000047936.11	ROS1	LTR19_1q24.3	-0.221685	4.72512e-07	2.46277e-06
ENSG00000157168.20	NRG1	ERVLE_1p31.1k	0.25173	9.39849e-09	2.48296e-06
ENSG00000157168.20	NRG1	PABLA_6q27a	0.251285	9.99961e-09	2.48637e-06
ENSG00000157764.14	BRAF	PABLB_14q11.2c	0.224013	3.55375e-07	2.48704e-06
ENSG00000157764.14	BRAF	ERVLB4_10q22.3a	0.223954	3.5794e-07	2.50085e-06
ENSG00000120217.14	CD274	HERVL40_14q13.1b	-0.23019	1.64404e-07	2.52704e-06
ENSG00000105976.16	MET	HUERSP3B_2q35	-0.235551	8.27112e-08	2.58978e-06
ENSG00000157764.14	BRAF	HERV3_7q33	0.224243	3.71484e-07	2.59119e-06
ENSG00000047936.11	ROS1	LTR25_3p22.1	0.221091	5.07894e-07	2.63419e-06
ENSG00000198400.12	NTRK1	ERVLE_4q24g	0.226271	2.68766e-07	2.64819e-06
ENSG00000047936.11	ROS1	MER4_19p12a	0.221006	5.13157e-07	2.65497e-06
ENSG00000157168.20	NRG1	HERVK11_1p33	0.249937	1.2053e-08	2.68147e-06
ENSG00000157168.20	NRG1	HML2_8p23.1d	0.250298	1.14653e-08	2.68147e-06
ENSG00000157764.14	BRAF	HERVIP10F_7p14.1	0.223056	3.99676e-07	2.78325e-06
ENSG00000157764.14	BRAF	ERVLE_1q23.2b	0.22361	4.01201e-07	2.78927e-06
ENSG00000047936.11	ROS1	MER4_2p21	0.220527	5.4378e-07	2.7997e-06
ENSG00000198400.12	NTRK1	ERVLE_1q32.2a	0.225761	2.86347e-07	2.80183e-06
ENSG00000198400.12	NTRK1	ERV316A3_9p21.1b	-0.225724	2.87657e-07	2.80814e-06
ENSG00000198400.12	NTRK1	HML2_3p12.3	0.225687	2.89005e-07	2.81481e-06
ENSG00000141736.14	ERBB2	HML3_12q13.11	0.242018	3.53266e-08	2.81746e-06
ENSG00000157764.14	BRAF	HARLEQUIN_17q21.33	0.222848	4.09999e-07	2.82719e-06
ENSG00000157764.14	BRAF	HERVFH21_19p12	0.222848	4.09957e-07	2.82719e-06
ENSG00000157764.14	BRAF	HERVH_1q42.13b	0.222799	4.12453e-07	2.83948e-06
ENSG00000165731.20	RET	HERVH_9q21.33c	0.238013	6.0006e-08	2.84995e-06
ENSG00000146648.19	EGFR	ERV316A3_6p21.2a	0.233365	1.09677e-07	2.89752e-06
ENSG00000157764.14	BRAF	HML5_19p12e	0.22257	4.24147e-07	2.91524e-06
ENSG00000157168.20	NRG1	ERVLE_12p11.23	0.24937	1.46057e-08	2.93992e-06
ENSG00000157168.20	NRG1	HERVI_7q33a	0.248804	1.4088e-08	2.93992e-06
ENSG00000047936.11	ROS1	ERV316A3_15q26.3a	0.220015	5.78541e-07	2.96065e-06
ENSG00000146648.19	EGFR	HML6_7p13	0.233725	1.14191e-07	2.99803e-06
ENSG00000157168.20	NRG1	ERVLE_15q25.1f	0.248014	1.57021e-08	3.01695e-06
ENSG00000157764.14	BRAF	HUERSP1_Xp22.2	0.222259	4.40592e-07	3.01845e-06
ENSG00000047936.11	ROS1	ERVLB4_5q31.1	0.219714	5.99912e-07	3.0663e-06
ENSG00000120217.14	CD274	ERVLB4_15q13.3a	0.228518	2.02985e-07	3.08639e-06
ENSG00000157168.20	NRG1	HERVH_16q22.1	0.247457	1.69447e-08	3.11414e-06
ENSG00000171094.18	ALK	HERVH_11q13.2b	0.240203	4.49641e-08	3.11579e-06
ENSG00000171094.18	ALK	HERVH_12q13.2b	0.240225	4.483e-08	3.11579e-06
ENSG00000157764.14	BRAF	LTR46_16q23.1	0.221901	4.60238e-07	3.14285e-06
ENSG00000188389.11	PDCD1	HERVL18_11q14.2b	0.230561	1.56852e-07	3.17231e-06
ENSG00000047936.11	ROS1	HERVH48_8q24.13	0.219379	6.24663e-07	3.18127e-06
ENSG00000105976.16	MET	MER4_Xq21.33a	-0.233803	1.03662e-07	3.1984e-06
ENSG00000157764.14	BRAF	HERV3_19q13.33	0.221716	4.70722e-07	3.2041e-06
ENSG00000165731.20	RET	HERVIP10F_2q21.2	0.236947	6.89833e-08	3.23992e-06
ENSG00000047936.11	ROS1	ERVLE_6p22.1a	-0.219116	6.44737e-07	3.27167e-06
ENSG00000198400.12	NTRK1	MER41_9q31.1c	0.224356	3.40654e-07	3.2726e-06
ENSG00000120217.14	CD274	HERVH_14q12c	-0.227955	2.17832e-07	3.28353e-06
ENSG00000198400.12	NTRK1	ERV316A3_6p21.2b	0.22426	3.44732e-07	3.2968e-06
ENSG00000198400.12	NTRK1	HERVL40_9p24.1a	0.224276	3.4405e-07	3.2968e-06
ENSG00000165731.20	RET	HERVH_6q14.1e	0.23663	7.18912e-08	3.30309e-06
ENSG00000105976.16	MET	ERV316A3_3q13.13d	0.233432	1.08733e-07	3.31404e-06
ENSG00000105976.16	MET	MER4_5p13.2a	-0.233414	1.08978e-07	3.31404e-06
ENSG00000198400.12	NTRK1	HERVW_5p14.3	0.224184	3.47962e-07	3.32017e-06
ENSG00000163599.17	CTLA4	HERV9_Xq23b	0.227775	2.22803e-07	3.33968e-06
ENSG00000047936.11	ROS1	ERV316A3_6p22.1n	0.219408	6.65045e-07	3.3586e-06
ENSG00000188389.11	PDCD1	ERV316A3_12q24.13	0.230003	1.68324e-07	3.37206e-06
ENSG00000120217.14	CD274	HERVH_5q23.2e	0.227689	2.25215e-07	3.37582e-06
ENSG00000165731.20	RET	HERVW_6q14.3a	0.236097	7.70554e-08	3.50229e-06
ENSG00000157764.14	BRAF	ERVLE_4q28.1b	0.220915	5.18803e-07	3.50316e-06
ENSG00000141736.14	ERBB2	ERVLE_2q21.2a	0.239953	4.64733e-08	3.57168e-06
ENSG00000157764.14	BRAF	MER4_3p21.31a	0.220724	5.31e-07	3.5741e-06
ENSG00000188389.11	PDCD1	HERVH_5q23.2e	0.22946	1.80273e-07	3.5944e-06
ENSG00000157764.14	BRAF	HERVH_6p22.3a	0.220624	5.37444e-07	3.61173e-06
ENSG00000157168.20	NRG1	ERVLB4_11p15.5e	0.24598	2.07221e-08	3.64968e-06
ENSG00000198400.12	NTRK1	HERVIP10FH_2p14	0.223217	3.91851e-07	3.68898e-06
ENSG00000163599.17	CTLA4	HERVW_4q21.22	0.22689	2.4886e-07	3.71707e-06
ENSG00000198400.12	NTRK1	MER61_2q31.1b	0.223136	3.95796e-07	3.71785e-06
ENSG00000171094.18	ALK	HERVH_3q26.1a	-0.238596	5.55779e-08	3.72901e-06
ENSG00000157764.14	BRAF	ERVLE_16p11.2b	0.220325	5.57275e-07	3.73313e-06
ENSG00000157168.20	NRG1	HERVH_9q22.33b	0.245498	2.21223e-08	3.74043e-06
ENSG00000171094.18	ALK	ERV316A3_10q26.12	0.238431	5.67981e-08	3.75134e-06
ENSG00000163599.17	CTLA4	ERV316A3_7q31.1c	-0.227036	2.6378e-07	3.8986e-06
ENSG00000157168.20	NRG1	HERVL_12q21.2b	0.244421	2.55906e-08	3.90161e-06
ENSG00000157168.20	NRG1	HML6_11p15.4	0.244889	2.40233e-08	3.90161e-06
ENSG00000157168.20	NRG1	MER41_2q31.2	0.244348	2.58446e-08	3.90161e-06
ENSG00000120217.14	CD274	MER34B_10q25.3a	-0.226411	2.6414e-07	3.90392e-06
ENSG00000157168.20	NRG1	MER101_2q35a	0.244816	2.69569e-08	3.9292e-06
ENSG00000157764.14	BRAF	ERV316A3_15q24.1b	0.219721	5.99447e-07	3.98406e-06
ENSG00000188389.11	PDCD1	ERVLE_6p22.1a	0.228594	2.01054e-07	3.98993e-06
ENSG00000047936.11	ROS1	ERV316A3_5q23.1b	0.217264	8.04783e-07	4.00674e-06
ENSG00000047936.11	ROS1	HML2_9q34.11	0.217254	8.05709e-07	4.00674e-06
ENSG00000120217.14	CD274	MER4_12q12b	0.226173	2.72067e-07	4.00706e-06
ENSG00000157764.14	BRAF	HML2_11p15.4a	0.219621	6.06728e-07	4.02612e-06
ENSG00000198400.12	NTRK1	HERVL_7q36.1b	-0.222956	4.34294e-07	4.05245e-06
ENSG00000157168.20	NRG1	HERVE_10p11.21	0.243235	3.00171e-08	4.09298e-06
ENSG00000157168.20	NRG1	HERVH_6p21.32	0.243242	2.99868e-08	4.09298e-06
ENSG00000105976.16	MET	HERVH_7p15.3b	0.231644	1.36673e-07	4.09729e-06
ENSG00000133703.13	KRAS	ERV316A3_12p12.3c	0.245441	2.22949e-08	4.09742e-06
ENSG00000141736.14	ERBB2	HERVIP10F_7p13	0.238498	5.63053e-08	4.11066e-06
ENSG00000198400.12	NTRK1	ERVLE_7p22.3	0.222144	4.468e-07	4.14171e-06
ENSG00000171094.18	ALK	HERVH_6q23.2b	0.237423	6.48199e-08	4.15142e-06
ENSG00000157764.14	BRAF	ERV316A3_12p11.23b	0.2193	6.30615e-07	4.16501e-06
ENSG00000171094.18	ALK	ERVLB4_7q36.1a	0.237283	6.60209e-08	4.16523e-06
ENSG00000165731.20	RET	HERVK11_1q32.3	-0.234673	9.26726e-08	4.16731e-06
ENSG00000188389.11	PDCD1	MER4B_8q21.11	0.228757	2.13174e-07	4.19111e-06
ENSG00000141736.14	ERBB2	HERVEA_15q21.3	0.238187	5.86492e-08	4.20187e-06
ENSG00000198400.12	NTRK1	HERVH_6p21.2b	0.222004	4.54471e-07	4.20361e-06
ENSG00000198400.12	NTRK1	HERVH_7q11.23a	0.221979	4.55895e-07	4.20757e-06
ENSG00000120217.14	CD274	ERVLE_7p21.3b	-0.225675	2.89421e-07	4.23316e-06
ENSG00000120217.14	CD274	MER4_1q25.1a	-0.225595	2.92323e-07	4.26085e-06
ENSG00000157764.14	BRAF	HML2_1q22	0.219647	6.46348e-07	4.26226e-06
ENSG00000047936.11	ROS1	HML1_11q13.4	0.216691	8.61538e-07	4.26431e-06
ENSG00000047936.11	ROS1	HERVH_21q21.1b	0.216673	8.63437e-07	4.26871e-06
ENSG00000047936.11	ROS1	ERVLE_8q22.3b	0.21664	8.66787e-07	4.28027e-06
ENSG00000047936.11	ROS1	HARLEQUIN_5q33.3	0.216584	8.72608e-07	4.30398e-06
ENSG00000171094.18	ALK	HERV4_11q21	0.236908	6.93334e-08	4.30989e-06
ENSG00000047936.11	ROS1	ERV316A3_4q21.3	0.216469	8.84654e-07	4.35831e-06
ENSG00000146648.19	EGFR	HERVH_14q12c	-0.229909	1.70338e-07	4.36376e-06
ENSG00000120217.14	CD274	ERVLE_3p21.31d	0.225358	3.01012e-07	4.37244e-06
ENSG00000141736.14	ERBB2	HERVH_10p15.1	0.237323	6.5671e-08	4.40621e-06
ENSG00000105976.16	MET	MER41_6q14.1b	-0.230857	1.51062e-07	4.46531e-06
ENSG00000146648.19	EGFR	HERVL_1p21.3b	0.229548	1.78293e-07	4.48599e-06
ENSG00000047936.11	ROS1	HERVFH19_13q34	0.216107	9.23434e-07	4.53351e-06
ENSG00000157764.14	BRAF	MER61_5p13.2	0.218516	6.92887e-07	4.54082e-06
ENSG00000120217.14	CD274	MER101_15q12	0.224951	3.16564e-07	4.58259e-06
ENSG00000198400.12	NTRK1	MER4_12q12b	0.221223	4.99815e-07	4.59287e-06
ENSG00000198400.12	NTRK1	HERVL_5q12.3	0.221148	5.04375e-07	4.62472e-06
ENSG00000171094.18	ALK	HUERSP2_14q31.3	0.236012	7.79145e-08	4.70493e-06
ENSG00000157764.14	BRAF	MER101_3q26.31	0.218149	7.24064e-07	4.7378e-06
ENSG00000198400.12	NTRK1	MER4_Xq21.33a	-0.220872	5.21552e-07	4.74108e-06
ENSG00000198400.12	NTRK1	HUERSP1_15q21.1a	0.220773	5.27862e-07	4.77789e-06
ENSG00000047936.11	ROS1	ERVLE_20q13.12c	0.215605	9.79997e-07	4.7945e-06
ENSG00000047936.11	ROS1	ERVLE_12q13.11b	0.215563	9.84927e-07	4.80749e-06
ENSG00000163599.17	CTLA4	HERVH_8q24.23c	0.224564	3.32055e-07	4.82547e-06
ENSG00000047936.11	ROS1	HERVH_13q13.3b	0.215493	9.93102e-07	4.8418e-06
ENSG00000047936.11	ROS1	HERVL40_5q11.2	0.215424	1.00119e-06	4.87559e-06
ENSG00000188389.11	PDCD1	HARLEQUIN_4q13.2a	0.226719	2.54221e-07	4.90682e-06
ENSG00000198400.12	NTRK1	ERV316A3_9q34.2b	0.220351	5.5551e-07	4.97531e-06
ENSG00000157764.14	BRAF	HML2_14q32.33	0.217672	7.66544e-07	4.99257e-06
ENSG00000157168.20	NRG1	MER41_4p16.1b	0.242266	3.77996e-08	4.99309e-06
ENSG00000047936.11	ROS1	HML3_4q34.1a	0.215205	1.02746e-06	4.9978e-06
ENSG00000198400.12	NTRK1	HERVL_4q24d	0.220212	5.64892e-07	5.0482e-06
ENSG00000047936.11	ROS1	HERVH_18q21.32	0.215075	1.04333e-06	5.06334e-06
ENSG00000120217.14	CD274	HERVE_11p15.4	-0.224537	3.58402e-07	5.13548e-06
ENSG00000047936.11	ROS1	HERVIP10FH_1p33a	0.214893	1.06591e-06	5.15517e-06
ENSG00000141736.14	ERBB2	HERV3_7q11.21	0.236334	8.18102e-08	5.16137e-06
ENSG00000146648.19	EGFR	MER4_15q22.31b	0.228107	2.13729e-07	5.16248e-06
ENSG00000165731.20	RET	HERV9_Xq23b	-0.232838	1.17345e-07	5.16683e-06
ENSG00000047936.11	ROS1	HERV9_17q22a	0.214778	1.08053e-06	5.20203e-06
ENSG00000171094.18	ALK	ERV316A3_8q23.1c	0.235124	8.74212e-08	5.20464e-06
ENSG00000198400.12	NTRK1	HERVH_6q23.2c	0.219854	5.8987e-07	5.21419e-06
ENSG00000198400.12	NTRK1	HML5_12q21.32	0.219864	5.89197e-07	5.21419e-06
ENSG00000198400.12	NTRK1	MER4_13q32.3b	0.219823	5.92101e-07	5.21419e-06
ENSG00000198400.12	NTRK1	MER4_6q14.2	0.21984	5.90883e-07	5.21419e-06
ENSG00000105976.16	MET	HML3_8p11.22	-0.229405	1.81544e-07	5.22031e-06
ENSG00000198400.12	NTRK1	HERVL_9q22.32	-0.219776	5.95438e-07	5.23268e-06
ENSG00000146648.19	EGFR	HERVH_6q12c	-0.227938	2.18306e-07	5.24306e-06
ENSG00000047936.11	ROS1	HML4_19p12	0.214541	1.11103e-06	5.34282e-06
ENSG00000146648.19	EGFR	HARLEQUIN_7q22.1	0.228346	2.24319e-07	5.35705e-06
ENSG00000146648.19	EGFR	LTR57_14q32.33a	0.227589	2.28044e-07	5.38516e-06
ENSG00000163599.17	CTLA4	ERVLE_7q34a	0.223628	3.7257e-07	5.39334e-06
ENSG00000047936.11	ROS1	ERVLE_8q24.3h	-0.214928	1.12784e-06	5.41746e-06
ENSG00000146648.19	EGFR	ERV316A3_6p21.2b	0.227476	2.31301e-07	5.43172e-06
ENSG00000157168.20	NRG1	HERVL32_2q31.3	0.240641	4.24279e-08	5.43462e-06
ENSG00000047936.11	ROS1	HERVH_6q22.1c	-0.214294	1.14382e-06	5.48177e-06
ENSG00000198400.12	NTRK1	MER41_1p34.3	0.219316	6.29383e-07	5.48537e-06
ENSG00000105976.16	MET	HERVH_1p31.3d	0.228894	1.93607e-07	5.49246e-06
ENSG00000141736.14	ERBB2	HUERSP1_8q13.3	0.23502	8.86009e-08	5.50759e-06
ENSG00000146648.19	EGFR	HUERSP3_2p25.2	0.227309	2.36182e-07	5.5157e-06
ENSG00000146648.19	EGFR	MER34B_7q11.23a	0.227235	2.38353e-07	5.53582e-06
ENSG00000047936.11	ROS1	HARLEQUIN_5q23.1	0.214157	1.16241e-06	5.53948e-06
ENSG00000198400.12	NTRK1	ERVLE_4q21.23a	0.219178	6.39967e-07	5.56614e-06
ENSG00000120217.14	CD274	HERVH_6q12c	-0.22319	3.93187e-07	5.57718e-06
ENSG00000120217.14	CD274	MER4_14q32.33a	0.223105	3.97284e-07	5.61646e-06
ENSG00000047936.11	ROS1	ERV316A3_10q22.1a	0.213901	1.19788e-06	5.70182e-06
ENSG00000105976.16	MET	HERVH_14q12c	-0.228518	2.02977e-07	5.7199e-06
ENSG00000157764.14	BRAF	ERVLE_5p15.31b	0.216364	8.9571e-07	5.73661e-06
ENSG00000163599.17	CTLA4	ERVLB4_14q23.3	0.222904	4.07183e-07	5.81475e-06
ENSG00000163599.17	CTLA4	MER4_12q12b	0.222818	4.11503e-07	5.85664e-06
ENSG00000047936.11	ROS1	HERVIP10FH_5q32	0.213525	1.25181e-06	5.89241e-06
ENSG00000047936.11	ROS1	LTR25_11q24.3b	-0.213495	1.25624e-06	5.9067e-06
ENSG00000141736.14	ERBB2	HERVEA_19p12a	0.234253	9.7837e-08	5.90796e-06
ENSG00000198400.12	NTRK1	ERV316A3_1q32.2a	0.2186	6.85921e-07	5.92814e-06
ENSG00000133703.13	KRAS	HERVEA_12q21.1	0.242238	3.43016e-08	6.04136e-06
ENSG00000171094.18	ALK	HERVH_20q13.12c	0.233367	1.09646e-07	6.09833e-06
ENSG00000171094.18	ALK	MER101_1p31.3	0.233368	1.09632e-07	6.09833e-06
ENSG00000163599.17	CTLA4	ERV316A3_2q22.3c	0.222379	4.34174e-07	6.11751e-06
ENSG00000047936.11	ROS1	HUERSP1_15q22.31	0.213144	1.30886e-06	6.12684e-06
ENSG00000157764.14	BRAF	HERVI_7q33c	-0.215724	9.66282e-07	6.14207e-06
ENSG00000157764.14	BRAF	HERVH48_1p22.3	0.215702	9.68817e-07	6.14894e-06
ENSG00000047936.11	ROS1	PABLB_14q11.2c	0.21296	1.33721e-06	6.23886e-06
ENSG00000146648.19	EGFR	ERVLE_4q21.1b	0.226105	2.74384e-07	6.26931e-06
ENSG00000141736.14	ERBB2	ERVLE_16p12.1c	0.23365	1.05728e-07	6.29451e-06
ENSG00000198400.12	NTRK1	PABLB_10p15.1b	-0.217897	7.46218e-07	6.37225e-06
ENSG00000141736.14	ERBB2	ERVLE_4q21.1b	0.233133	1.12986e-07	6.45396e-06
ENSG00000141736.14	ERBB2	HML3_7p13	0.233323	1.1026e-07	6.45396e-06
ENSG00000198400.12	NTRK1	HERV3_21q22.13	0.217763	7.58216e-07	6.46165e-06
ENSG00000157168.20	NRG1	ERV316A3_8q23.1c	0.238754	5.44382e-08	6.57458e-06
ENSG00000157168.20	NRG1	HERVH_1p33	0.238965	5.29446e-08	6.57458e-06
ENSG00000157764.14	BRAF	ERVLE_Xq22.1a	0.214953	1.0584e-06	6.64762e-06
ENSG00000171094.18	ALK	ERV316A3_1p31.3f	0.232453	1.23275e-07	6.68053e-06
ENSG00000163599.17	CTLA4	HERVS71_12p13.31b	0.221392	4.89618e-07	6.83042e-06
ENSG00000157764.14	BRAF	HERVS71_11p15.4	0.214696	1.09099e-06	6.84215e-06
ENSG00000105976.16	MET	ERVLE_20q13.33a	-0.226914	2.48106e-07	6.85452e-06
ENSG00000141736.14	ERBB2	ERVLB4_9q31.3	-0.232439	1.23496e-07	6.86865e-06
ENSG00000157168.20	NRG1	ERVLB4_7q36.1a	0.237965	6.03836e-08	6.89842e-06
ENSG00000146648.19	EGFR	HERVE_2q37.1	0.225757	3.08739e-07	6.90498e-06
ENSG00000146648.19	EGFR	HERVH_18q12.2a	-0.225104	3.1062e-07	6.91048e-06
ENSG00000047936.11	ROS1	HERVL_1q32.1	0.211925	1.50863e-06	6.97702e-06
ENSG00000198400.12	NTRK1	HERVH_3p22.3b	0.217018	8.2872e-07	6.99202e-06
ENSG00000198400.12	NTRK1	ERV316A3_6p25.1e	0.216888	8.41605e-07	7.07249e-06
ENSG00000047936.11	ROS1	MER4_13q32.3b	0.211681	1.55198e-06	7.15402e-06
ENSG00000157168.20	NRG1	ERV316A3_19q13.2	0.237469	6.44345e-08	7.16749e-06
ENSG00000198400.12	NTRK1	MER41_22q12.3e	0.217239	8.59966e-07	7.21245e-06
ENSG00000120217.14	CD274	ERVLB4_Xq21.33c	-0.22086	5.22291e-07	7.21479e-06
ENSG00000198400.12	NTRK1	MER101_12p13.31b	0.217178	8.66245e-07	7.25072e-06
ENSG00000188389.11	PDCD1	HERVL18_3p21.31b	0.223319	3.87006e-07	7.30301e-06
ENSG00000047936.11	ROS1	HERVH_3q26.31c	0.211408	1.60191e-06	7.36008e-06
ENSG00000047936.11	ROS1	HERVL_6q24.1g	-0.211396	1.6042e-06	7.36258e-06
ENSG00000120217.14	CD274	PABLB_10p15.1b	-0.220594	5.39439e-07	7.37932e-06
ENSG00000047936.11	ROS1	HERVH_2p12d	-0.21131	1.6202e-06	7.42371e-06
ENSG00000047936.11	ROS1	MER4B_7q21.11b	0.211306	1.62103e-06	7.42371e-06
ENSG00000146648.19	EGFR	ERVLE_20q13.12b	0.224395	3.39047e-07	7.42566e-06
ENSG00000198400.12	NTRK1	HERVL_2p11.2b	0.216333	8.98984e-07	7.49844e-06
ENSG00000157764.14	BRAF	HERVIP10FH_14q12	0.213866	1.20279e-06	7.52099e-06
ENSG00000171094.18	ALK	LTR25_7q36.1	0.231342	1.42042e-07	7.60017e-06
ENSG00000133703.13	KRAS	MER101_3q26.31	0.239886	4.68885e-08	7.62298e-06
ENSG00000157764.14	BRAF	MER4_3q29c	0.213719	1.22359e-06	7.62848e-06
ENSG00000165731.20	RET	HERVL18_2q23.1	0.229172	1.86958e-07	7.9027e-06
ENSG00000105976.16	MET	HERVH_1q42.2e	-0.225515	2.95225e-07	7.99945e-06
ENSG00000047936.11	ROS1	HERVL_7q11.21b	0.210602	1.75843e-06	8.0182e-06
ENSG00000120217.14	CD274	HERVH_4q22.3a	0.219857	5.89662e-07	8.04032e-06
ENSG00000120217.14	CD274	HERVL_9p24.1b	0.219702	6.008e-07	8.15641e-06
ENSG00000146648.19	EGFR	LTR46_16q23.1	0.223473	3.79731e-07	8.19036e-06
ENSG00000146648.19	EGFR	MER4_19p12a	0.223472	3.79775e-07	8.19036e-06
ENSG00000141736.14	ERBB2	HML2_3q27.2	0.230653	1.55023e-07	8.19105e-06
ENSG00000157764.14	BRAF	HML2_3q27.2	0.213004	1.33049e-06	8.2222e-06
ENSG00000188389.11	PDCD1	MER41_22q12.3c	0.222231	4.42067e-07	8.26821e-06
ENSG00000047936.11	ROS1	ERVLE_8p23.1b	0.210289	1.82313e-06	8.29119e-06
ENSG00000047936.11	ROS1	HARLEQUIN_4q32.1	0.210284	1.82418e-06	8.29119e-06
ENSG00000141736.14	ERBB2	HML3_1q21.3c	0.230394	1.60208e-07	8.36049e-06
ENSG00000198400.12	NTRK1	HERVS71_12p13.31b	0.215299	1.01607e-06	8.38857e-06
ENSG00000120217.14	CD274	ERV316A3_1q42.12b	0.219378	6.24693e-07	8.43635e-06
ENSG00000198400.12	NTRK1	MER4B_17p11.2a	0.215231	1.02421e-06	8.43927e-06
ENSG00000120217.14	CD274	MER41_17q23.3a	0.219317	6.29358e-07	8.47228e-06
ENSG00000198400.12	NTRK1	HUERSP3B_7p21.3	0.215133	1.03614e-06	8.52096e-06
ENSG00000105976.16	MET	HML2_1q22	0.225551	3.16619e-07	8.52452e-06
ENSG00000146648.19	EGFR	HERV9_Xq23b	0.222954	4.04703e-07	8.59637e-06
ENSG00000171094.18	ALK	ERVLE_6p21.32	0.229907	1.70379e-07	8.67044e-06
ENSG00000171094.18	ALK	HERVH_3q26.1i	0.229819	1.72301e-07	8.67044e-06
ENSG00000171094.18	ALK	HERVL_3q25.32	0.229918	1.70151e-07	8.67044e-06
ENSG00000120217.14	CD274	ERV316A3_6p22.1p	-0.218991	6.54525e-07	8.72769e-06
ENSG00000120217.14	CD274	ERV316A3_12q21.1	-0.218949	6.57768e-07	8.74335e-06
ENSG00000188389.11	PDCD1	HERVH_2q31.1c	0.221689	4.7229e-07	8.756e-06
ENSG00000171094.18	ALK	HERVH_15q25.3a	0.229383	1.82039e-07	8.93109e-06
ENSG00000171094.18	ALK	HERVH_2q33.2	0.229306	1.83819e-07	8.93109e-06
ENSG00000047936.11	ROS1	HERVIP10F_22q13.2	-0.21003	1.98447e-06	8.96192e-06
ENSG00000198400.12	NTRK1	ERV316A3_4q31.23c	0.21456	1.10852e-06	9.0458e-06
ENSG00000047936.11	ROS1	HERVH_10p15.1	-0.209449	2.00818e-06	9.04966e-06
ENSG00000047936.11	ROS1	HML6_19p12e	0.209271	2.0495e-06	9.22603e-06
ENSG00000157168.20	NRG1	LTR25_2p13.3	0.235309	8.53513e-08	9.25077e-06
ENSG00000157168.20	NRG1	ERV316A3_5q14.3a	0.235068	8.80588e-08	9.30561e-06
ENSG00000198400.12	NTRK1	HUERSP2_14q31.3	0.214285	1.14496e-06	9.3072e-06
ENSG00000047936.11	ROS1	HERVP71A_5q14.3	-0.209164	2.07487e-06	9.33029e-06
ENSG00000157764.14	BRAF	HERVIP10F_1p36.33	0.211805	1.52983e-06	9.38549e-06
ENSG00000133703.13	KRAS	ERVLB4_12q21.1a	0.237719	6.23609e-08	9.41427e-06
ENSG00000133703.13	KRAS	HERVK11_5q35.1	0.237731	6.226e-08	9.41427e-06
ENSG00000157764.14	BRAF	ERVLE_1q32.2a	0.211754	1.53889e-06	9.4274e-06
ENSG00000146648.19	EGFR	HERVP71A_10q25.1	0.222035	4.52797e-07	9.47511e-06
ENSG00000146648.19	EGFR	ERV316A3_3p21.31c	0.22196	4.56934e-07	9.49007e-06
ENSG00000146648.19	EGFR	HML2_9q34.11	0.221941	4.58002e-07	9.49007e-06
ENSG00000157764.14	BRAF	ERVLE_2q11.2c	0.211529	1.57961e-06	9.62108e-06
ENSG00000157764.14	BRAF	HERVH_22q12.1	-0.211514	1.58235e-06	9.62386e-06
ENSG00000146648.19	EGFR	HUERSP1_7p12.3a	0.221742	4.69224e-07	9.6282e-06
ENSG00000146648.19	EGFR	MER41_9q22.32	0.221468	4.85154e-07	9.75152e-06
ENSG00000146648.19	EGFR	MER4_7p21.1	0.221379	4.90414e-07	9.77821e-06
ENSG00000157168.20	NRG1	MER41_9q31.1c	0.2344	9.59922e-08	9.89657e-06
ENSG00000198400.12	NTRK1	HERVH_Xq22.2b	0.213667	1.2312e-06	9.9699e-06
ENSG00000146648.19	EGFR	HERVL18_6q14.1	-0.221047	5.10593e-07	1.01328e-05
ENSG00000120217.14	CD274	HUERSP2_14q31.3	0.217594	7.7371e-07	1.01884e-05
ENSG00000163599.17	CTLA4	HERVH_19q13.41a	0.218376	7.51853e-07	1.02519e-05
ENSG00000120217.14	CD274	ERVLE_1q42.12a	-0.217494	7.83034e-07	1.02791e-05
ENSG00000120217.14	CD274	HERVL40_6q14.1	-0.21744	7.88033e-07	1.03127e-05
ENSG00000198400.12	NTRK1	HERVH_6q23.2b	0.213352	1.27736e-06	1.03239e-05
ENSG00000105976.16	MET	HERVL_Xq21.33a	-0.223013	4.01757e-07	1.04186e-05
ENSG00000188389.11	PDCD1	ERVLE_7q34a	0.220135	5.70205e-07	1.0434e-05
ENSG00000157764.14	BRAF	PABLB_14q11.2b	0.210695	1.73979e-06	1.05209e-05
ENSG00000157764.14	BRAF	ERVLE_17q21.31	0.210681	1.7425e-06	1.05222e-05
ENSG00000198400.12	NTRK1	HERVEA_19q13.33	0.213111	1.31387e-06	1.05987e-05
ENSG00000198400.12	NTRK1	HML1_10p15.1	-0.213054	1.32271e-06	1.06497e-05
ENSG00000146648.19	EGFR	ERVLE_1p36.13b	0.220525	5.43942e-07	1.06941e-05
ENSG00000146648.19	EGFR	HUERSP1_7q21.12	0.220558	5.41789e-07	1.06941e-05
ENSG00000047936.11	ROS1	ERV316A3_15q21.3c	0.207815	2.42089e-06	1.08172e-05
ENSG00000157764.14	BRAF	MER61_16p12.3	0.210368	1.80656e-06	1.08625e-05
ENSG00000120217.14	CD274	ERVLE_2q14.1b	0.216861	8.44292e-07	1.09138e-05
ENSG00000047936.11	ROS1	HERVS71_8p23.1a	0.207641	2.46923e-06	1.10099e-05
ENSG00000157764.14	BRAF	HERVP71A_6q14.1	0.21019	1.84406e-06	1.10408e-05
ENSG00000157764.14	BRAF	HERVL66_4p15.2	0.210094	1.86454e-06	1.11319e-05
ENSG00000146648.19	EGFR	LTR57_5p12a	0.219994	5.79972e-07	1.12456e-05
ENSG00000163599.17	CTLA4	ERV316A3_6p22.1n	0.217505	8.33405e-07	1.126e-05
ENSG00000146648.19	EGFR	HERVH_7q11.21	0.220497	5.83921e-07	1.12705e-05
ENSG00000198400.12	NTRK1	HERVL_2q37.1	-0.212438	1.42129e-06	1.14216e-05
ENSG00000120217.14	CD274	ERVLE_12p11.23	0.216861	8.99236e-07	1.15534e-05
ENSG00000141736.14	ERBB2	ERV316A3_8q13.3a	-0.22805	2.32723e-07	1.15732e-05
ENSG00000141736.14	ERBB2	MER4_4p12b	0.227231	2.38475e-07	1.15866e-05
ENSG00000188389.11	PDCD1	LTR23_9q22.33a	0.219215	6.3706e-07	1.16071e-05
ENSG00000120217.14	CD274	LTR57_5p12b	0.216201	9.1316e-07	1.16614e-05
ENSG00000047936.11	ROS1	HERV3_4p16.1	0.207059	2.63812e-06	1.17506e-05
ENSG00000171094.18	ALK	HUERSP2_19q13.2	0.227024	2.44718e-07	1.17548e-05
ENSG00000047936.11	ROS1	HML3_3p22.2	0.207462	2.65474e-06	1.18122e-05
ENSG00000157764.14	BRAF	HUERSP1_15q22.31	0.209491	1.99841e-06	1.18475e-05
ENSG00000047936.11	ROS1	HERV3_3q13.2	0.206905	2.68454e-06	1.19322e-05
ENSG00000165731.20	RET	ERVLE_20q13.33a	0.225435	2.98143e-07	1.20024e-05
ENSG00000141736.14	ERBB2	ERVLE_1p36.12	0.226851	2.50062e-07	1.20115e-05
ENSG00000105976.16	MET	HERVIP10FH_14q12	0.221622	4.76144e-07	1.21979e-05
ENSG00000198400.12	NTRK1	MER101_7q36.1a	-0.212324	1.52541e-06	1.22119e-05
ENSG00000146648.19	EGFR	MER4_15q22.31a	0.219141	6.42803e-07	1.22393e-05
ENSG00000157168.20	NRG1	HML6_12q24.12a	0.23322	1.21739e-07	1.22522e-05
ENSG00000105976.16	MET	HERVL40_18q22.1a	-0.221489	4.83881e-07	1.23215e-05
ENSG00000157168.20	NRG1	ERVLB4_17q24.3	-0.231277	1.43217e-07	1.25107e-05
ENSG00000157168.20	NRG1	HERVH_12q21.2a	0.231851	1.33119e-07	1.25107e-05
ENSG00000157168.20	NRG1	HERVH_3q23a	0.231178	1.45025e-07	1.25107e-05
ENSG00000157168.20	NRG1	HERVH_7p21.1a	0.23166	1.36406e-07	1.25107e-05
ENSG00000157168.20	NRG1	HERVL_12q21.2c	0.231617	1.37148e-07	1.25107e-05
ENSG00000047936.11	ROS1	LTR25_3q26.33a	-0.206359	2.85587e-06	1.26671e-05
ENSG00000120217.14	CD274	ERVLB4_13q12.12a	0.215404	1.00361e-06	1.27395e-05
ENSG00000120217.14	CD274	HML3_1q25.2	0.215418	1.00191e-06	1.27395e-05
ENSG00000146648.19	EGFR	HERVL18_4q21.1	-0.218732	6.75145e-07	1.27403e-05
ENSG00000105976.16	MET	LTR25_1q22	0.221144	5.04601e-07	1.27722e-05
ENSG00000171094.18	ALK	ERVLE_Xp11.4b	0.226174	2.72041e-07	1.29204e-05
ENSG00000198400.12	NTRK1	HERVL40_4q31.3a	0.211271	1.62748e-06	1.30045e-05
ENSG00000047936.11	ROS1	MER4B_Xq26.2a	-0.206059	2.95441e-06	1.30631e-05
ENSG00000047936.11	ROS1	HERVL32_2p15a	-0.205986	2.97893e-06	1.3144e-05
ENSG00000157764.14	BRAF	HERVH_11q23.3c	0.208497	2.23951e-06	1.32028e-05
ENSG00000163599.17	CTLA4	HERVL_2p11.2b	0.215542	9.87289e-07	1.32066e-05
ENSG00000047936.11	ROS1	HERVH_19p12b	0.205901	3.00765e-06	1.32431e-05
ENSG00000171094.18	ALK	HERVFRD_Xq21.33b	0.225816	2.84411e-07	1.33578e-05
ENSG00000120217.14	CD274	HML2_8p22	-0.21494	1.06003e-06	1.33754e-05
ENSG00000047936.11	ROS1	HUERSP1_8q21.13	-0.205776	3.05017e-06	1.34163e-05
ENSG00000198400.12	NTRK1	HERVW_Xq22.3c	0.210983	1.68278e-06	1.3421e-05
ENSG00000157168.20	NRG1	HERVE_3p26.3	0.230455	1.58968e-07	1.34392e-05
ENSG00000047936.11	ROS1	MER4_2q37.3a	-0.205657	3.09154e-06	1.357e-05
ENSG00000047936.11	ROS1	ERV316A3_1p32.1a	0.20562	3.10447e-06	1.36127e-05
ENSG00000120217.14	CD274	ERVLE_18q21.1b	0.214694	1.09119e-06	1.37276e-05
ENSG00000105976.16	MET	HERVL18_4q21.1	-0.220457	5.48406e-07	1.37983e-05
ENSG00000105976.16	MET	HERVH_1p31.1a	0.220842	5.60267e-07	1.38494e-05
ENSG00000105976.16	MET	HML3_4q31.3	0.220299	5.58994e-07	1.38494e-05
ENSG00000171094.18	ALK	MER61_2q35	0.225402	2.99374e-07	1.39061e-05
ENSG00000198400.12	NTRK1	ERVLE_17q21.31	0.21064	1.75075e-06	1.39106e-05
ENSG00000146648.19	EGFR	HERVIP10FH_3q13.33	-0.217762	7.5837e-07	1.39852e-05
ENSG00000198400.12	NTRK1	MER61_2q35	0.210518	1.77565e-06	1.40556e-05
ENSG00000120217.14	CD274	HERVIP10F_8p11.22	-0.21439	1.131e-06	1.41024e-05
ENSG00000165731.20	RET	HERVL_6q27a	0.223922	3.59382e-07	1.41973e-05
ENSG00000157168.20	NRG1	HERVH_5q35.1a	0.229858	1.71447e-07	1.42099e-05
ENSG00000165731.20	RET	MER4_Xq21.33c	0.223806	3.64518e-07	1.42668e-05
ENSG00000105976.16	MET	HERVK11_22q11.21	-0.219841	5.90788e-07	1.44698e-05
ENSG00000105976.16	MET	HML1_15q21.2	-0.219821	5.92212e-07	1.44698e-05
ENSG00000198400.12	NTRK1	LTR25_12p11.22b	0.210211	1.83954e-06	1.45341e-05
ENSG00000165731.20	RET	HML3_8p11.22	0.22352	3.77568e-07	1.4642e-05
ENSG00000198400.12	NTRK1	HERVI_9q22.1	-0.21009	1.86556e-06	1.46847e-05
ENSG00000047936.11	ROS1	HML3_13q12.11a	-0.204871	3.37718e-06	1.47778e-05
ENSG00000198400.12	NTRK1	ERV316A3_6p22.1k	0.20993	1.90015e-06	1.49016e-05
ENSG00000157764.14	BRAF	HERVIP10FH_1p33a	0.207271	2.57542e-06	1.50363e-05
ENSG00000157764.14	BRAF	ERV316A3_14q23.1e	0.207247	2.5824e-06	1.50563e-05
ENSG00000165731.20	RET	MER101_2q35a	0.223657	3.98901e-07	1.51906e-05
ENSG00000163599.17	CTLA4	MER41_19q13.43a	0.214735	1.15348e-06	1.52845e-05
ENSG00000146648.19	EGFR	ERVLB4_13q34b	0.216908	8.39645e-07	1.52982e-05
ENSG00000120217.14	CD274	HML6_19p13.2d	0.213603	1.24039e-06	1.53757e-05
ENSG00000141736.14	ERBB2	ERV316A3_12p12.3c	0.224589	3.31019e-07	1.5376e-05
ENSG00000141736.14	ERBB2	HARLEQUIN_12p13.32	0.224692	3.26865e-07	1.5376e-05
ENSG00000141736.14	ERBB2	HERV3_14q32.33	0.224668	3.27804e-07	1.5376e-05
ENSG00000165731.20	RET	ERV316A3_18q22.3e	0.222878	4.08489e-07	1.54168e-05
ENSG00000157168.20	NRG1	PABLB_10p15.1b	0.228949	1.92273e-07	1.56296e-05
ENSG00000047936.11	ROS1	PABLB_14q11.2a	0.204336	3.58612e-06	1.56597e-05
ENSG00000047936.11	ROS1	HERVH_1q41f	0.204255	3.61854e-06	1.57686e-05
ENSG00000047936.11	ROS1	HERVL_12q21.2c	0.204225	3.63085e-06	1.5806e-05
ENSG00000198400.12	NTRK1	ERVLB4_9q22.2b	0.209349	2.03128e-06	1.58417e-05
ENSG00000105976.16	MET	HERVL_9p24.1b	0.218832	6.67122e-07	1.60223e-05
ENSG00000047936.11	ROS1	ERVLE_2q37.3e	0.204069	3.69492e-06	1.60353e-05
ENSG00000047936.11	ROS1	HUERSP2_11q22.1c	0.204046	3.70437e-06	1.60598e-05
ENSG00000047936.11	ROS1	LTR25_12p11.22b	0.204001	3.72311e-06	1.61246e-05
ENSG00000120217.14	CD274	HERVE_2p14a	0.21311	1.3141e-06	1.62149e-05
ENSG00000120217.14	CD274	PABLA_7q32.1	0.213099	1.31576e-06	1.62149e-05
ENSG00000047936.11	ROS1	HERVP71A_15q24.2	0.203937	3.74974e-06	1.62233e-05
ENSG00000146648.19	EGFR	MER61_2q35	0.216172	9.16376e-07	1.66245e-05
ENSG00000047936.11	ROS1	ERV316A3_3q13.12c	0.203705	3.84827e-06	1.66326e-05
ENSG00000198400.12	NTRK1	MER4_15q22.31b	0.20886	2.14837e-06	1.66627e-05
ENSG00000120217.14	CD274	HUERSP1_7p12.3a	0.212743	1.3716e-06	1.6854e-05
ENSG00000120217.14	CD274	MER61_5p13.2	0.212696	1.37909e-06	1.68969e-05
ENSG00000163599.17	CTLA4	ERVLB4_17q25.3b	0.21322	1.29721e-06	1.69238e-05
ENSG00000198400.12	NTRK1	HERVIP10F_19p13.2b	0.208637	2.20388e-06	1.70619e-05
ENSG00000146648.19	EGFR	HERVIP10F_8p11.22	-0.215827	9.54592e-07	1.70977e-05
ENSG00000198400.12	NTRK1	HERVL_2q34c	0.20858	2.21838e-06	1.71427e-05
ENSG00000198400.12	NTRK1	HML3_9q34.13	0.208542	2.22816e-06	1.71869e-05
ENSG00000047936.11	ROS1	HML2_11q23.3	0.20338	3.99e-06	1.71924e-05
ENSG00000165731.20	RET	MER41_6q14.1b	0.221765	4.67949e-07	1.72002e-05
ENSG00000198400.12	NTRK1	HERVH_4q21.3	0.208453	2.25095e-06	1.73311e-05
ENSG00000047936.11	ROS1	HERVK11_2q14.2	0.203252	4.04772e-06	1.74056e-05
ENSG00000120217.14	CD274	HERV3_14q32.33	-0.212221	1.45756e-06	1.77553e-05
ENSG00000105976.16	MET	ERVLE_22q13.31e	-0.2178	7.54944e-07	1.78276e-05
ENSG00000047936.11	ROS1	MER4B_14q32.33d	0.202997	4.16397e-06	1.78692e-05
ENSG00000157764.14	BRAF	HERVL40_10p12.1	0.205563	3.12424e-06	1.79676e-05
ENSG00000120217.14	CD274	MER41_1q44a	0.212087	1.48048e-06	1.79828e-05
ENSG00000198400.12	NTRK1	HML5_1q22	0.20853	2.3531e-06	1.80192e-05
ENSG00000120217.14	CD274	ERVLB4_8p23.1k	0.212026	1.49102e-06	1.80589e-05
ENSG00000047936.11	ROS1	HERVIP10FH_10q23.33	-0.202559	4.3718e-06	1.87041e-05
ENSG00000047936.11	ROS1	HERVI_16q22.2	0.202515	4.39314e-06	1.87763e-05
ENSG00000105976.16	MET	ERV316A3_8q24.12b	0.217313	8.00118e-07	1.87894e-05
ENSG00000198400.12	NTRK1	MER41_22q12.3b	0.207575	2.48781e-06	1.88796e-05
ENSG00000165731.20	RET	MER41_20q13.12	0.220598	5.39183e-07	1.89927e-05
ENSG00000163599.17	CTLA4	MER41_17q23.3b	0.21216	1.46795e-06	1.90339e-05
ENSG00000171094.18	ALK	HML6_19p13.2d	0.222667	4.19162e-07	1.92587e-05
ENSG00000165731.20	RET	HERVE_2q37.1	-0.220967	5.51982e-07	1.92829e-05
ENSG00000198400.12	NTRK1	HERVH_5q22.1	0.207272	2.57512e-06	1.94029e-05
ENSG00000157764.14	BRAF	ERV316A3_11q12.3	0.204618	3.47443e-06	1.99003e-05
ENSG00000133703.13	KRAS	HERVI_7q33a	-0.231628	1.36959e-07	1.99629e-05
ENSG00000146648.19	EGFR	HERVFRD_19q13.41	0.21435	1.1363e-06	2.00968e-05
ENSG00000198400.12	NTRK1	HERV9_15q21.1a	0.206868	2.69581e-06	2.01328e-05
ENSG00000157168.20	NRG1	HERVH_3q21.3a	0.226322	2.67076e-07	2.01595e-05
ENSG00000157764.14	BRAF	ERVLB4_13q34b	0.204397	3.56145e-06	2.02888e-05
ENSG00000198400.12	NTRK1	HML3_16p13.13	0.206746	2.73332e-06	2.03411e-05
ENSG00000198400.12	NTRK1	HERVIP10F_22q13.2	-0.207185	2.73886e-06	2.03465e-05
ENSG00000163599.17	CTLA4	HERVH_19q13.32b	0.211552	1.57542e-06	2.03648e-05
ENSG00000157764.14	BRAF	ERVLE_9q33.2b	0.204339	3.58467e-06	2.03935e-05
ENSG00000165731.20	RET	MER41_1q41a	0.219795	5.94103e-07	2.04168e-05
ENSG00000105976.16	MET	ERVLE_5q14.3h	0.216486	8.82849e-07	2.05044e-05
ENSG00000047936.11	ROS1	ERV316A3_5q31.3c	0.201625	4.84821e-06	2.0555e-05
ENSG00000157764.14	BRAF	ERVLE_11q23.3d	0.204224	3.63141e-06	2.0604e-05
ENSG00000120217.14	CD274	HERVFH21_7q11.21	0.210757	1.72731e-06	2.06253e-05
ENSG00000165731.20	RET	MER4_7p21.1	-0.219584	6.09437e-07	2.07749e-05
ENSG00000198400.12	NTRK1	ERV316A3_5q23.1b	0.206444	2.8285e-06	2.07932e-05
ENSG00000047936.11	ROS1	HERVW_21q21.1	-0.201501	4.91478e-06	2.07956e-05
ENSG00000120217.14	CD274	HERVL18_5q34	-0.21055	1.76909e-06	2.10055e-05
ENSG00000120217.14	CD274	MER4_5p12b	0.210569	1.76528e-06	2.10055e-05
ENSG00000165731.20	RET	MER4_12p12.2a	-0.219332	6.28173e-07	2.12423e-05
ENSG00000047936.11	ROS1	ERV316A3_6p22.1p	0.201257	5.04906e-06	2.12785e-05
ENSG00000141736.14	ERBB2	MER4_17q11.2a	0.221466	4.85274e-07	2.13231e-05
ENSG00000047936.11	ROS1	MER41_22q12.3c	0.201171	5.09709e-06	2.14596e-05
ENSG00000047936.11	ROS1	ERV316A3_20q13.33b	0.201454	5.17257e-06	2.16909e-05
ENSG00000047936.11	ROS1	HERVL_3p24.3b	-0.20104	5.17132e-06	2.16909e-05
ENSG00000047936.11	ROS1	MER41_9q31.1a	0.201011	5.18775e-06	2.1733e-05
ENSG00000188389.11	PDCD1	HERVH_5q23.2f	-0.213715	1.22429e-06	2.17441e-05
ENSG00000188389.11	PDCD1	LTR25_12p11.22b	0.213738	1.22094e-06	2.17441e-05
ENSG00000120217.14	CD274	HML1_11q13.4	-0.210184	1.84546e-06	2.17899e-05
ENSG00000165731.20	RET	HERVFH21_Xq11.2b	0.219033	6.51193e-07	2.1846e-05
ENSG00000198400.12	NTRK1	ERVLB4_10q22.3a	0.205941	2.99404e-06	2.19338e-05
ENSG00000165731.20	RET	HERVL_3p24.3b	0.218911	6.60801e-07	2.19938e-05
ENSG00000157764.14	BRAF	MER4_6p12.1	-0.203539	3.91995e-06	2.20634e-05
ENSG00000047936.11	ROS1	ERVLB4_19q13.12	0.20119	5.3241e-06	2.22601e-05
ENSG00000047936.11	ROS1	HERVL18_2p12	-0.200725	5.35385e-06	2.23624e-05
ENSG00000171094.18	ALK	MER4B_Xq21.33	0.221127	5.05664e-07	2.27387e-05
ENSG00000157764.14	BRAF	HERVH_9q22.32	0.203124	4.10559e-06	2.29251e-05
ENSG00000146648.19	EGFR	HUERSP1_8q13.3	0.213014	1.32894e-06	2.29282e-05
ENSG00000198400.12	NTRK1	MER41_6q23.2	0.205441	3.16765e-06	2.31255e-05
ENSG00000157764.14	BRAF	ERVLE_1p36.12	0.203013	4.15684e-06	2.31501e-05
ENSG00000120217.14	CD274	HML3_3q13.11b	0.209529	1.98971e-06	2.32335e-05
ENSG00000157764.14	BRAF	HML2_11q12.3b	0.202931	4.19491e-06	2.32628e-05
ENSG00000157764.14	BRAF	HERVIP10FH_6q25.3	0.202881	4.21814e-06	2.33378e-05
ENSG00000163599.17	CTLA4	MER4B_12q22	0.210185	1.84514e-06	2.34216e-05
ENSG00000198400.12	NTRK1	HERVP71A_1q44b	0.205237	3.24099e-06	2.35389e-05
ENSG00000165731.20	RET	HERVL18_3q25.31	0.218086	7.29511e-07	2.35393e-05
ENSG00000157764.14	BRAF	HERVH_10q22.3b	0.202752	4.27881e-06	2.36425e-05
ENSG00000047936.11	ROS1	HUERSP3_7q11.21a	-0.200071	5.75273e-06	2.38634e-05
ENSG00000105976.16	MET	ERVLB4_17q25.1	0.215052	1.04613e-06	2.40326e-05
ENSG00000157764.14	BRAF	HERVFRD_21q22.3	0.20253	4.38577e-06	2.41703e-05
ENSG00000165731.20	RET	HERVEA_5q22.2	0.217672	7.66554e-07	2.45471e-05
ENSG00000157764.14	BRAF	MER41_14q32.2	0.202304	4.4974e-06	2.47501e-05
ENSG00000157764.14	BRAF	ERVLB4_13q14.11a	0.202225	4.53667e-06	2.49045e-05
ENSG00000141736.14	ERBB2	ERV316A3_9p13.3a	0.219854	5.89904e-07	2.49352e-05
ENSG00000120217.14	CD274	HERVH_7q22.3b	0.208781	2.1679e-06	2.51061e-05
ENSG00000120217.14	CD274	PABLA_19p12a	0.208789	2.16598e-06	2.51061e-05
ENSG00000105976.16	MET	MER41_17q23.3b	0.214476	1.11964e-06	2.54448e-05
ENSG00000157764.14	BRAF	HERVP71A_6p21.1b	0.201964	4.66982e-06	2.56022e-05
ENSG00000141736.14	ERBB2	HARLEQUIN_5q33.3	0.219552	6.11764e-07	2.56032e-05
ENSG00000163599.17	CTLA4	HERVE_3p26.3	0.20931	2.04039e-06	2.56914e-05
ENSG00000047936.11	ROS1	HML3_3q13.33	-0.199327	6.24049e-06	2.57855e-05
ENSG00000141736.14	ERBB2	ERV316A3_6p25.1b	0.219406	6.22596e-07	2.58011e-05
ENSG00000146648.19	EGFR	HML6_19p13.2d	0.211786	1.53329e-06	2.58216e-05
ENSG00000163599.17	CTLA4	HERVH_18q22.3b	-0.209133	2.08233e-06	2.59646e-05
ENSG00000171094.18	ALK	LTR25_12p11.22a	0.219897	5.86855e-07	2.60345e-05
ENSG00000198400.12	NTRK1	ERVLB4_11p15.5e	0.20426	3.61673e-06	2.60442e-05
ENSG00000047936.11	ROS1	ERV316A3_2q31.1b	-0.199192	6.33302e-06	2.61422e-05
ENSG00000163599.17	CTLA4	HML1_15q21.2	-0.208892	2.14057e-06	2.65343e-05
ENSG00000163599.17	CTLA4	ERV316A3_20q13.33b	0.209286	2.15977e-06	2.6694e-05
ENSG00000141736.14	ERBB2	HERVH_11q23.3b	0.219033	6.51169e-07	2.67232e-05
ENSG00000198400.12	NTRK1	MER4_12q12a	0.203961	3.73962e-06	2.67921e-05
ENSG00000198400.12	NTRK1	HERVL_3p13b	0.203908	3.76192e-06	2.69063e-05
ENSG00000047936.11	ROS1	MER4_1p12b	0.198896	6.54098e-06	2.69218e-05
ENSG00000120217.14	CD274	HUERSP1_9q22.33	0.207898	2.39798e-06	2.72481e-05
ENSG00000163599.17	CTLA4	HERVIP10FH_6q25.3	0.208555	2.22479e-06	2.74174e-05
ENSG00000157764.14	BRAF	MER41_4p16.1b	0.201671	5.05108e-06	2.74433e-05
ENSG00000157168.20	NRG1	MER4B_17p11.2a	0.223504	3.78288e-07	2.75462e-05
ENSG00000146648.19	EGFR	MER4B_1p36.33	0.21117	1.64667e-06	2.76209e-05
ENSG00000198400.12	NTRK1	ERVLB4_8q24.3d	-0.204008	3.90477e-06	2.78338e-05
ENSG00000120217.14	CD274	PABLB_1q31.3a	0.207681	2.45815e-06	2.78568e-05
ENSG00000198400.12	NTRK1	HML3_13q12.11b	0.20353	3.92401e-06	2.79239e-05
ENSG00000171094.18	ALK	MER34B_4q31.3	0.21906	6.49121e-07	2.8287e-05
ENSG00000157764.14	BRAF	ERV316A3_9q32a	0.200824	5.29586e-06	2.85896e-05
ENSG00000157168.20	NRG1	HERVH_6q23.2c	0.222918	4.06493e-07	2.86375e-05
ENSG00000157168.20	NRG1	MER101_1p35.2	0.222622	4.21453e-07	2.87335e-05
ENSG00000198400.12	NTRK1	HERVH_4q13.2	0.203188	4.07644e-06	2.89112e-05
ENSG00000105976.16	MET	HERVH_7q22.3b	0.212968	1.336e-06	2.91096e-05
ENSG00000165731.20	RET	HERVFRD_14q11.2	0.216128	9.21179e-07	2.92769e-05
ENSG00000163599.17	CTLA4	HARLEQUIN_1p33	0.207923	2.39112e-06	2.92964e-05
ENSG00000047936.11	ROS1	HERV3_7q11.21	0.198443	7.17365e-06	2.92976e-05
ENSG00000047936.11	ROS1	MER4_3p21.31a	0.198038	7.18075e-06	2.92983e-05
[truncated: 16,695 more rows]

## Sheet: LUSC
ENSEMBL	gene_name	HERV	spearman	spearman_Pval	spearman_adjPval
ENSG00000188389.11	PDCD1	HERVL_4q32.1a	0.386316	0	0
ENSG00000163599.17	CTLA4	HERVL_4q32.1a	0.421123	0	0
ENSG00000188389.11	PDCD1	HERV4_4q12	0.476451	0	0
ENSG00000188389.11	PDCD1	MER4B_12p13.31c	0.522709	0	0
ENSG00000163599.17	CTLA4	MER4B_12p13.31c	0.534425	0	0
ENSG00000163599.17	CTLA4	HERV4_4q12	0.536716	0	0
ENSG00000188389.11	PDCD1	HML3_16p13.3	0.554276	0	0
ENSG00000188389.11	PDCD1	MER41_6p22.3	0.574086	0	0
ENSG00000163599.17	CTLA4	MER4_22q12.3	0.584506	0	0
ENSG00000188389.11	PDCD1	MER4_22q12.3	0.611978	0	0
ENSG00000163599.17	CTLA4	MER41_6p22.3	0.618809	0	0
ENSG00000163599.17	CTLA4	HML3_16p13.3	0.624369	0	0
ENSG00000163599.17	CTLA4	ERVLB4_17q21.32	0.650668	0	0
ENSG00000188389.11	PDCD1	ERVLB4_17q21.32	0.653294	0	0
ENSG00000163599.17	CTLA4	HERVL74_17q12	0.734388	0	0
ENSG00000188389.11	PDCD1	HERVL74_17q12	0.738577	0	0
ENSG00000188389.11	PDCD1	HARLEQUIN_17q12	0.754397	0	0
ENSG00000163599.17	CTLA4	HARLEQUIN_17q12	0.758836	0	0
ENSG00000047936.11	ROS1	HERVEA_6q22.31	0.775968	1.00514e-100	4.4618e-97
ENSG00000047936.11	ROS1	ERV316A3_1q32.2a	0.7456	6.0459e-89	1.34189e-85
ENSG00000047936.11	ROS1	HERVH_7p21.1a	0.701893	1.16351e-74	1.72161e-71
ENSG00000047936.11	ROS1	HERVH_6q23.2c	0.699561	5.68234e-74	6.30598e-71
ENSG00000188389.11	PDCD1	HERVEA_12p13.31	0.692741	5.38605e-72	1.83913e-69
ENSG00000163599.17	CTLA4	HERVH_1q24.2	0.685305	6.67756e-70	2.28013e-67
ENSG00000163599.17	CTLA4	HERVEA_12p13.31	0.684181	1.36577e-69	4.33046e-67
ENSG00000047936.11	ROS1	HERVFH21_1q23.1	0.683382	2.26835e-69	2.01384e-66
ENSG00000047936.11	ROS1	ERVLB4_Xq21.33b	0.677527	8.87166e-68	6.56355e-65
ENSG00000163599.17	CTLA4	ERVLB4_11p15.5c	0.669623	1.09588e-65	3.24308e-63
ENSG00000188389.11	PDCD1	ERVLB4_11p15.5c	0.669001	1.59071e-65	5.04369e-63
ENSG00000163599.17	CTLA4	MER4B_19q13.42a	0.668417	2.25613e-65	6.25934e-63
ENSG00000047936.11	ROS1	HUERSP3B_Xq21.33	0.668356	2.33962e-65	1.48365e-62
ENSG00000047936.11	ROS1	HERVH_12p13.32	0.666924	5.4879e-65	3.0451e-62
ENSG00000047936.11	ROS1	ERVLE_1q32.2a	0.666309	7.9019e-65	3.89739e-62
ENSG00000047936.11	ROS1	HERVEA_15q21.3	0.663409	4.36002e-64	1.93541e-61
ENSG00000047936.11	ROS1	ERV316A3_9q34.3b	0.660615	2.21934e-63	8.95605e-61
ENSG00000047936.11	ROS1	HERVH_5q23.2a	0.655792	3.53673e-62	1.30829e-59
ENSG00000188389.11	PDCD1	MER4B_19q13.42a	0.653637	1.19888e-61	3.5479e-59
ENSG00000163599.17	CTLA4	PABLA_19q13.2	0.641534	9.49344e-59	2.34119e-56
ENSG00000047936.11	ROS1	ERVLB4_Xq21.33c	0.641487	9.73665e-59	3.32469e-56
ENSG00000047936.11	ROS1	HERVH_17p11.2	0.638439	4.98452e-58	1.58045e-55
ENSG00000163599.17	CTLA4	HERVEA_5q22.2	0.6371	1.01588e-57	2.37341e-55
ENSG00000188389.11	PDCD1	HERVH_1q24.2	0.628259	1.02296e-55	2.67114e-53
ENSG00000188389.11	PDCD1	PABLA_19q13.2	0.627836	1.27111e-55	3.13471e-53
ENSG00000188389.11	PDCD1	HERVW_17q12a	0.625933	3.35879e-55	7.8472e-53
ENSG00000163599.17	CTLA4	HERVL74_19q13.41a	0.617699	2.08632e-53	4.63059e-51
ENSG00000163599.17	CTLA4	HERVW_17q12a	0.617391	2.42873e-53	5.13387e-51
ENSG00000188389.11	PDCD1	HERVEA_5q22.2	0.616964	2.99824e-53	6.65459e-51
ENSG00000047936.11	ROS1	HML3_8q13.2	0.612925	2.16185e-52	6.39763e-50
ENSG00000047936.11	ROS1	HERVH_6q23.2b	0.608555	1.77518e-51	4.92501e-49
ENSG00000047936.11	ROS1	HERVH_1q31.1a	0.594101	1.49613e-48	3.90667e-46
ENSG00000047936.11	ROS1	HERVH_8q24.23c	0.588385	1.95708e-47	4.82637e-45
ENSG00000163599.17	CTLA4	MER4_Xq21.1a	0.585387	7.38837e-47	1.49077e-44
ENSG00000188389.11	PDCD1	ERVL_22q12.3b	0.585261	7.81079e-47	1.65105e-44
ENSG00000188389.11	PDCD1	HUERSP1_11p15.4b	0.582324	2.82957e-46	5.7093e-44
ENSG00000163599.17	CTLA4	HERVFH21_Xq11.2b	0.581351	4.32185e-46	8.34116e-44
ENSG00000047936.11	ROS1	HERVH_6p21.32	0.580445	6.40337e-46	1.49603e-43
ENSG00000188389.11	PDCD1	MER4_Xq21.1a	0.579591	9.26626e-46	1.78839e-43
ENSG00000188389.11	PDCD1	HERVS71_19p13.3	0.574142	9.53981e-45	1.76447e-42
ENSG00000047936.11	ROS1	HERVFRD_14q11.2	0.565909	2.98066e-43	6.30055e-41
ENSG00000188389.11	PDCD1	HERVL74_19q13.41a	0.560993	2.22338e-42	3.796e-40
ENSG00000163599.17	CTLA4	HERVS71_19p13.3	0.559594	3.91527e-42	6.43699e-40
ENSG00000163599.17	CTLA4	HUERSP1_11p15.4b	0.559408	4.22011e-42	6.69038e-40
ENSG00000163599.17	CTLA4	ERVL_22q12.3b	0.556469	1.37169e-41	2.09963e-39
ENSG00000188389.11	PDCD1	HERVFH21_Xq11.2b	0.555718	1.85099e-41	2.93447e-39
ENSG00000163599.17	CTLA4	HERVFH21_Xq11.2a	0.553969	3.70574e-41	5.48327e-39
ENSG00000163599.17	CTLA4	HERVL_7p15.2a	0.549865	1.86006e-40	2.66349e-38
ENSG00000047936.11	ROS1	HERVIP10FH_11p15.5	0.545312	1.08512e-39	2.18948e-37
ENSG00000188389.11	PDCD1	HERVFH21_Xq11.2a	0.542582	3.08445e-39	4.56396e-37
ENSG00000047936.11	ROS1	HERVL_Xq21.33d	0.53482	5.71052e-38	1.10213e-35
ENSG00000188389.11	PDCD1	HERVL_7p15.2a	0.533748	8.49378e-38	1.21625e-35
ENSG00000163599.17	CTLA4	ERVLB4_17q25.1	0.530455	2.85171e-37	3.83598e-35
ENSG00000198400.12	NTRK1	HARLEQUIN_17q12	0.53985	8.69113e-39	3.85799e-35
ENSG00000163599.17	CTLA4	ERVLE_2p14b	0.529935	3.44839e-37	4.50217e-35
ENSG00000163599.17	CTLA4	ERVLB4_7q36.1a	0.527161	9.45134e-37	1.1987e-34
ENSG00000163599.17	CTLA4	ERV316A3_22q13.1	0.525721	1.58948e-36	1.95992e-34
ENSG00000163599.17	CTLA4	MER34B_1q23.3b	0.525101	1.98658e-36	2.38336e-34
ENSG00000047936.11	ROS1	HERVEA_1p21.1a	0.524833	2.18752e-36	4.04599e-34
ENSG00000047936.11	ROS1	HERVFH21_8q11.21	0.524191	2.75392e-36	4.88985e-34
ENSG00000188389.11	PDCD1	ERVLE_2p14b	0.523098	4.07071e-36	5.64683e-34
ENSG00000047936.11	ROS1	MER4_Xq21.33c	0.523167	3.97086e-36	6.77948e-34
ENSG00000163599.17	CTLA4	HML3_1q25.2	0.52086	9.02028e-36	1.02669e-33
ENSG00000188389.11	PDCD1	HML3_1q25.2	0.520273	1.11024e-35	1.44951e-33
ENSG00000047936.11	ROS1	HERVH_5q32b	0.520516	1.01876e-35	1.67492e-33
ENSG00000163599.17	CTLA4	HML2_1q23.3	0.516534	4.13076e-35	4.4723e-33
ENSG00000047936.11	ROS1	HERVE_9q34.3	0.515753	5.42551e-35	8.60136e-33
ENSG00000047936.11	ROS1	HUERSP3B_3q28a	0.510105	3.8086e-34	5.82978e-32
ENSG00000198400.12	NTRK1	ERVLB4_11p15.5c	0.515001	7.04563e-35	1.56378e-31
ENSG00000188389.11	PDCD1	ERVLB4_17q25.1	0.505791	1.64728e-33	2.03118e-31
ENSG00000163599.17	CTLA4	HUERSP1_15q21.1a	0.504073	2.9348e-33	3.1018e-31
ENSG00000163599.17	CTLA4	HERVH_6q23.1	0.503178	3.95868e-33	4.08665e-31
ENSG00000047936.11	ROS1	HERVL18_3p21.31b	0.502841	4.43125e-33	6.55677e-31
ENSG00000188389.11	PDCD1	HUERSP1_15q21.1a	0.500956	8.29457e-33	9.95124e-31
ENSG00000047936.11	ROS1	HUERSP3B_1p33a	0.499222	1.47201e-32	2.10782e-30
ENSG00000047936.11	ROS1	HARLEQUIN_2q32.1	0.498276	2.00984e-32	2.78803e-30
ENSG00000188389.11	PDCD1	HERVH_6q23.1	0.497607	2.5034e-32	2.92437e-30
ENSG00000198400.12	NTRK1	HERVL74_17q12	0.504612	2.44918e-33	3.62396e-30
ENSG00000047936.11	ROS1	ERVLE_1p31.1k	0.495445	5.076e-32	6.82799e-30
ENSG00000198400.12	NTRK1	HML3_16p13.3	0.501706	6.46695e-33	7.17669e-30
ENSG00000163599.17	CTLA4	PRIMA4_14q22.1	0.493828	8.58222e-32	8.65829e-30
ENSG00000188389.11	PDCD1	HERVL_17q12a	0.492658	1.25305e-31	1.39057e-29
ENSG00000047936.11	ROS1	MER4_12q12a	0.493059	1.10056e-31	1.43688e-29
ENSG00000188389.11	PDCD1	ERV316A3_22q13.1	0.491299	1.94055e-31	2.05098e-29
ENSG00000047936.11	ROS1	HML2_17p13.1	0.488975	4.08354e-31	5.17909e-29
ENSG00000163599.17	CTLA4	MER41_1q44a	0.487917	5.7183e-31	5.40075e-29
ENSG00000163599.17	CTLA4	MER4_7q21.2	0.487617	6.29023e-31	5.81715e-29
ENSG00000047936.11	ROS1	ERV316A3_21q22.3b	0.487926	5.70186e-31	7.03071e-29
ENSG00000047936.11	ROS1	MER41_2q31.2	0.4876	6.32319e-31	7.58613e-29
ENSG00000047936.11	ROS1	HERVH_2p22.2c	0.487046	7.53872e-31	8.80641e-29
ENSG00000188389.11	PDCD1	ERVLB4_7q36.1a	0.484982	1.44633e-30	1.49309e-28
ENSG00000163599.17	CTLA4	HUERSP3_2p25.2	0.479248	8.63811e-30	7.66892e-28
ENSG00000047936.11	ROS1	ERVLB4_11p15.5e	0.479076	9.11167e-30	1.03709e-27
ENSG00000188389.11	PDCD1	MER34B_1q23.3b	0.477075	1.68571e-29	1.66286e-27
ENSG00000188389.11	PDCD1	MER101_2p25.2	0.476762	1.85568e-29	1.79073e-27
ENSG00000163599.17	CTLA4	HERVH_2q33.2	0.476353	2.10268e-29	1.79496e-27
ENSG00000047936.11	ROS1	ERVLE_15q25.3b	0.475736	2.53919e-29	2.81787e-27
ENSG00000188389.11	PDCD1	MER4_7q21.2	0.475127	3.05753e-29	2.82757e-27
ENSG00000047936.11	ROS1	MER4B_Xq21.33	0.475426	2.7907e-29	3.02144e-27
ENSG00000047936.11	ROS1	MER4_Xq21.33a	0.47508	3.10136e-29	3.27784e-27
ENSG00000047936.11	ROS1	MER4_12q12e	0.474842	3.33468e-29	3.44247e-27
ENSG00000188389.11	PDCD1	HML3_8q24.13	0.471368	9.53898e-29	8.64154e-27
ENSG00000047936.11	ROS1	HML5_Xq21.33	0.47011	1.39194e-28	1.37307e-26
ENSG00000163599.17	CTLA4	HERVL_17q12a	0.468668	2.14195e-28	1.72875e-26
ENSG00000163599.17	CTLA4	HML3_8q24.13	0.466348	4.26689e-28	3.32293e-26
ENSG00000188389.11	PDCD1	HUERSP3_2p25.2	0.466656	3.89441e-28	3.38966e-26
ENSG00000198400.12	NTRK1	ERVLB4_17q21.32	0.472189	7.44852e-29	6.61279e-26
ENSG00000163599.17	CTLA4	MER101_2p25.2	0.463392	1.01878e-27	7.53726e-26
ENSG00000047936.11	ROS1	HERVEA_Xp11.21	0.46392	8.72531e-28	8.41992e-26
ENSG00000188389.11	PDCD1	HERVP71A_12p13.33a	0.462935	1.16466e-27	9.94218e-26
ENSG00000188389.11	PDCD1	HERV9_15q21.1a	0.461529	1.75584e-27	1.44337e-25
ENSG00000188389.11	PDCD1	MER41_1q44a	0.460622	2.28562e-27	1.8447e-25
ENSG00000163599.17	CTLA4	HML5_8p21.2	0.46012	2.64439e-27	1.8933e-25
ENSG00000188389.11	PDCD1	HML2_1q23.3	0.459816	2.88759e-27	2.28893e-25
ENSG00000198400.12	NTRK1	ERV316A3_22q13.1	0.466426	4.16866e-28	2.64352e-25
ENSG00000163599.17	CTLA4	ERVLB4_8q21.13d	0.458051	4.80673e-27	3.38684e-25
ENSG00000188389.11	PDCD1	MER34B_19p13.11	0.457533	5.57962e-27	4.27033e-25
ENSG00000047936.11	ROS1	HERVL_12q21.2b	0.457465	5.69016e-27	5.37417e-25
ENSG00000163599.17	CTLA4	HERVH_12q13.2b	0.455745	9.31449e-27	6.46047e-25
ENSG00000198400.12	NTRK1	PRIMA4_14q22.1	0.46172	1.66057e-27	8.19031e-25
ENSG00000188389.11	PDCD1	ERVL_Xq21.1a	0.45493	1.17508e-26	8.55112e-25
ENSG00000163599.17	CTLA4	MER34B_19p13.11	0.454683	1.26084e-26	8.61055e-25
ENSG00000188389.11	PDCD1	HERVP71A_12p13.33b	0.454701	1.25441e-26	8.83862e-25
ENSG00000198400.12	NTRK1	MER34B_1q23.3b	0.460612	2.29209e-27	1.01746e-24
ENSG00000163599.17	CTLA4	ERVL_Xq21.1a	0.453962	1.54802e-26	1.04116e-24
ENSG00000047936.11	ROS1	HERVH_3p22.3b	0.454428	1.3556e-26	1.25365e-24
ENSG00000198400.12	NTRK1	HUERSP1_11p15.4b	0.455675	9.50067e-27	3.83395e-24
ENSG00000047936.11	ROS1	HERVK14C_16p12.3	0.449803	5.00404e-26	4.53325e-24
ENSG00000163599.17	CTLA4	MER34B_1q23.3a	0.448082	8.09219e-26	5.28254e-24
ENSG00000163599.17	CTLA4	HERV9_15q21.1a	0.44773	8.92707e-26	5.74308e-24
ENSG00000188389.11	PDCD1	HERVH_12q13.2b	0.444237	2.34604e-25	1.57789e-23
ENSG00000047936.11	ROS1	HERVE_2q37.1	0.443681	2.73385e-25	2.42711e-23
ENSG00000047936.11	ROS1	HUERSP3_2q24.2	0.443232	3.09169e-25	2.69098e-23
ENSG00000163599.17	CTLA4	HERVP71A_12p13.33a	0.439753	7.98132e-25	4.99001e-23
ENSG00000198400.12	NTRK1	HERVS71_19p13.3	0.446003	1.44156e-25	5.33255e-23
ENSG00000163599.17	CTLA4	ERVLE_11q23.3c	0.439243	9.16383e-25	5.64976e-23
ENSG00000163599.17	CTLA4	ERV316A3_6q22.33	0.43908	9.57652e-25	5.82331e-23
ENSG00000047936.11	ROS1	HERVH_11q23.3b	0.439477	8.6009e-25	7.34219e-23
ENSG00000188389.11	PDCD1	ERVLE_11q23.3c	0.437295	1.54921e-24	9.9666e-23
ENSG00000047936.11	ROS1	HERVH_20q13.12c	0.436444	1.94724e-24	1.63091e-22
ENSG00000163599.17	CTLA4	MER4_10q23.31a	0.433517	4.25082e-24	2.54992e-22
ENSG00000198400.12	NTRK1	HERVFH21_Xq11.2a	0.439341	8.92346e-25	2.82938e-22
ENSG00000163599.17	CTLA4	HML6_4q21.1	0.433005	4.86883e-24	2.84378e-22
ENSG00000047936.11	ROS1	HUERSP1_7q21.12	0.434102	3.63888e-24	2.99129e-22
ENSG00000188389.11	PDCD1	HERVH_2p11.2c	0.432765	5.18852e-24	3.24392e-22
ENSG00000047936.11	ROS1	HERVFRD_Xq21.33b	0.433662	4.09012e-24	3.3011e-22
ENSG00000188389.11	PDCD1	HERVH_2q33.2	0.432431	5.66775e-24	3.49432e-22
ENSG00000047936.11	ROS1	HERVP71A_6p21.1a	0.433341	4.45393e-24	3.53053e-22
ENSG00000198400.12	NTRK1	HERVH_1q24.2	0.437598	1.42811e-24	4.22627e-22
ENSG00000047936.11	ROS1	MER61_8q24.22	0.431851	6.60692e-24	5.14529e-22
ENSG00000047936.11	ROS1	MER4_1p21.3	0.43137	7.50015e-24	5.7402e-22
ENSG00000198400.12	NTRK1	MER34B_1q23.3a	0.435556	2.46943e-24	6.85112e-22
ENSG00000047936.11	ROS1	HERVP71A_6p21.1b	0.430609	9.16391e-24	6.89468e-22
ENSG00000163599.17	CTLA4	HML2_1q32.2	0.429459	1.23901e-23	6.96197e-22
ENSG00000047936.11	ROS1	ERVLE_15q25.1f	0.429428	1.24924e-23	9.2423e-22
ENSG00000047936.11	ROS1	HERVE_19p12	0.428752	1.49102e-23	1.08502e-21
ENSG00000198400.12	NTRK1	HERVL_4q32.1a	0.432381	5.74266e-24	1.27458e-21
ENSG00000198400.12	NTRK1	HERVFH21_Xq11.2b	0.43252	5.53532e-24	1.27458e-21
ENSG00000198400.12	NTRK1	HERV4_4q12	0.430544	9.32166e-24	1.97042e-21
ENSG00000188389.11	PDCD1	ERV316A3_6q22.33	0.425285	3.66874e-23	2.23089e-21
ENSG00000163599.17	CTLA4	HML5_12q15	0.424521	4.46774e-23	2.41858e-21
ENSG00000188389.11	PDCD1	ERV316A3_12q24.13	0.424541	4.44469e-23	2.66621e-21
ENSG00000188389.11	PDCD1	HML5_8p21.2	0.423337	6.05772e-23	3.58536e-21
ENSG00000198400.12	NTRK1	PABLA_19q13.2	0.427331	2.1589e-23	4.35606e-21
ENSG00000198400.12	NTRK1	HERVL74_19q13.41a	0.427127	2.27702e-23	4.39466e-21
ENSG00000163599.17	CTLA4	HERVP71A_12p13.33b	0.421358	1.00502e-22	5.37504e-21
ENSG00000163599.17	CTLA4	ERV316A3_12q24.13	0.421228	1.0389e-22	5.49008e-21
ENSG00000047936.11	ROS1	HERVH_12q21.2b	0.422187	8.13373e-23	5.82349e-21
ENSG00000163599.17	CTLA4	ERVLE_20q13.32b	0.419862	1.46992e-22	7.67644e-21
ENSG00000188389.11	PDCD1	HERVE_10p13c	0.419423	1.64289e-22	9.34975e-21
ENSG00000198400.12	NTRK1	ERVLB4_17q25.1	0.423764	5.4296e-23	1.00425e-20
ENSG00000163599.17	CTLA4	HERVH_2p11.2c	0.418388	2.1342e-22	1.10159e-20
ENSG00000188389.11	PDCD1	PRIMA4_14q22.1	0.41837	2.144e-22	1.20471e-20
ENSG00000047936.11	ROS1	HERVL_1p22.1b	0.419095	1.78544e-22	1.25802e-20
ENSG00000163599.17	CTLA4	HERVK11_1q23.3a	0.417607	2.59851e-22	1.32584e-20
ENSG00000047936.11	ROS1	ERV316A3_10q26.12	0.417977	2.36734e-22	1.64197e-20
ENSG00000198400.12	NTRK1	HERVEA_5q22.2	0.421325	1.01343e-22	1.79944e-20
ENSG00000188389.11	PDCD1	HML6_4q21.1	0.416255	3.64973e-22	2.02515e-20
ENSG00000198400.12	NTRK1	ERV316A3_21q22.11b	0.415888	4.00042e-22	6.57699e-20
ENSG00000047936.11	ROS1	MER61_16p12.3	0.411391	1.22235e-21	8.22125e-20
ENSG00000188389.11	PDCD1	ERVLB4_8q21.13d	0.409083	2.15443e-21	1.15223e-19
ENSG00000188389.11	PDCD1	ERVLE_20q13.32b	0.408789	2.31535e-21	1.22355e-19
ENSG00000188389.11	PDCD1	ERVLB4_12p13.31e	0.408279	2.62205e-21	1.36933e-19
ENSG00000198400.12	NTRK1	HERVH_6q23.1	0.411546	1.17667e-21	1.86544e-19
ENSG00000198400.12	NTRK1	ERVLB4_8q21.13d	0.407165	3.43933e-21	5.08907e-19
ENSG00000198400.12	NTRK1	ERVL_22q12.3b	0.406836	3.72532e-21	5.33442e-19
ENSG00000198400.12	NTRK1	MER4B_19q13.42a	0.406637	3.90962e-21	5.42338e-19
ENSG00000047936.11	ROS1	HML1_6q22.32	0.402395	1.08619e-20	7.19641e-19
ENSG00000047936.11	ROS1	HERV9_6p21.2	0.402208	1.1358e-20	7.41442e-19
ENSG00000188389.11	PDCD1	HML2_1q32.2	0.401142	1.46449e-20	7.47224e-19
ENSG00000188389.11	PDCD1	ERV316A3_3q27.3e	0.398745	2.58579e-20	1.30436e-18
ENSG00000163599.17	CTLA4	HERVE_10p13c	0.398458	2.76686e-20	1.33501e-18
ENSG00000198400.12	NTRK1	MER101_2p25.2	0.402424	1.0785e-20	1.40808e-18
ENSG00000047936.11	ROS1	ERV316A3_19q13.2	0.398289	2.87956e-20	1.85252e-18
ENSG00000188389.11	PDCD1	HML5_12q15	0.397027	3.87582e-20	1.91164e-18
ENSG00000198400.12	NTRK1	HML3_1q25.2	0.399708	2.05878e-20	2.46998e-18
ENSG00000163599.17	CTLA4	ERVLB4_17q12	0.394729	6.63349e-20	3.13256e-18
ENSG00000047936.11	ROS1	HERV3_4q13.2b	0.395933	5.00829e-20	3.17597e-18
ENSG00000047936.11	ROS1	HML6_12q24.12a	0.395638	5.36574e-20	3.35472e-18
ENSG00000198400.12	NTRK1	ERVLE_11q14.2a	0.396515	4.3701e-20	5.10497e-18
ENSG00000163599.17	CTLA4	ERVLE_5q22.2b	0.392303	1.16461e-19	5.3851e-18
ENSG00000047936.11	ROS1	HERVE_7p22.1c	0.392097	1.22138e-19	7.53012e-18
ENSG00000198400.12	NTRK1	HERVW_17q12a	0.394017	7.82888e-20	8.6881e-18
ENSG00000047936.11	ROS1	HERVL66_5q15	0.390646	1.70628e-19	1.03756e-17
ENSG00000188389.11	PDCD1	HERVK11_1q23.3a	0.388487	2.79714e-19	1.33511e-17
ENSG00000047936.11	ROS1	ERVLB4_3p21.31d	0.389215	2.36841e-19	1.40178e-17
ENSG00000047936.11	ROS1	ERV316A3_4q31.23c	0.388733	2.64418e-19	1.54441e-17
ENSG00000198400.12	NTRK1	HERV3_21q22.13	0.391317	1.46221e-19	1.58311e-17
ENSG00000188389.11	PDCD1	HERVIP10FH_2p14	0.387557	3.45655e-19	1.6323e-17
ENSG00000047936.11	ROS1	MER34B_4q31.3	0.386457	4.43704e-19	2.55792e-17
ENSG00000157764.14	BRAF	HERVH_7q34a	0.401813	1.24796e-20	2.76985e-17
ENSG00000157764.14	BRAF	HERV3_7q34a	0.399065	2.39759e-20	3.54763e-17
ENSG00000047936.11	ROS1	HERVFRD_6p24.2	0.383439	8.75721e-19	4.98375e-17
ENSG00000047936.11	ROS1	HERVL32_2q31.3	0.382355	1.11614e-18	6.27159e-17
ENSG00000188389.11	PDCD1	HERVL_1q23.3a	0.370591	1.35849e-18	6.2816e-17
ENSG00000198400.12	NTRK1	HML3_8q24.13	0.384449	6.98131e-19	7.04319e-17
ENSG00000188389.11	PDCD1	MER34B_1q23.3a	0.380796	1.57962e-18	7.2288e-17
ENSG00000047936.11	ROS1	HERVFRD_7q21.3	0.381179	1.45063e-18	8.0492e-17
ENSG00000047936.11	ROS1	HERVH_1q42.13c	0.380922	1.53601e-18	8.4177e-17
ENSG00000047936.11	ROS1	ERVLE_11q14.2a	0.380705	1.61174e-18	8.72501e-17
ENSG00000198400.12	NTRK1	HUERSP3_2p25.2	0.383296	9.04329e-19	8.9207e-17
ENSG00000157168.20	NRG1	HERVH_6q12c	0.396756	4.12955e-20	9.16554e-17
ENSG00000157168.20	NRG1	HARLEQUIN_10q23.1	0.397272	3.65905e-20	9.16554e-17
ENSG00000198400.12	NTRK1	HERVL_7p15.2a	0.382866	9.95642e-19	9.60794e-17
ENSG00000198400.12	NTRK1	ERVLE_8q21.3f	0.382213	1.15207e-18	1.0881e-16
ENSG00000198400.12	NTRK1	HERVEA_12p13.31	0.381905	1.23413e-18	1.11802e-16
ENSG00000188389.11	PDCD1	HML6_12q24.12a	0.370035	2.57057e-18	1.16436e-16
ENSG00000198400.12	NTRK1	ERVLE_8p23.1b	0.381184	1.44888e-18	1.28631e-16
ENSG00000198400.12	NTRK1	HERVL40_4q31.3b	0.380783	1.58396e-18	1.37867e-16
ENSG00000047936.11	ROS1	ERV316A3_11q12.1a	0.377868	3.01669e-18	1.61338e-16
ENSG00000047936.11	ROS1	ERVLB4_17q25.1	0.376791	3.82106e-18	2.01925e-16
ENSG00000163599.17	CTLA4	HERVL40_4q31.3b	0.375525	5.04022e-18	2.17219e-16
ENSG00000163599.17	CTLA4	ERVLB4_12p13.31e	0.375386	5.19468e-18	2.21723e-16
ENSG00000047936.11	ROS1	HERVH_10q22.3b	0.376276	4.27717e-18	2.23369e-16
ENSG00000163599.17	CTLA4	ERVLE_8p23.1b	0.373686	7.51758e-18	3.14816e-16
ENSG00000188389.11	PDCD1	HERVL40_9q34.3	0.373302	8.16836e-18	3.45327e-16
ENSG00000188389.11	PDCD1	MER41_22q12.3c	0.372942	8.83054e-18	3.698e-16
ENSG00000163599.17	CTLA4	HML3_Xq21.1a	0.372851	9.00607e-18	3.73626e-16
ENSG00000047936.11	ROS1	HERVH_3p21.31e	0.373705	7.48649e-18	3.86425e-16
ENSG00000198400.12	NTRK1	ERVLE_15q25.3b	0.375334	5.25464e-18	4.24097e-16
ENSG00000163599.17	CTLA4	ERV316A3_3q27.3e	0.372154	1.04676e-17	4.26292e-16
ENSG00000157764.14	BRAF	HERVH_7q34b	0.386797	4.10737e-19	4.55816e-16
ENSG00000047936.11	ROS1	HERVIP10FH_6q22.1	0.372381	9.96902e-18	5.08649e-16
ENSG00000198400.12	NTRK1	HERVH_4q22.3a	0.372923	8.86781e-18	7.02932e-16
ENSG00000198400.12	NTRK1	ERVLE_7p22.3	0.372572	9.56556e-18	7.44939e-16
ENSG00000198400.12	NTRK1	HML3_4q31.3	0.372468	9.7819e-18	7.48653e-16
ENSG00000188389.11	PDCD1	ERVLB4_17q12	0.368466	2.30658e-17	9.22424e-16
ENSG00000198400.12	NTRK1	LTR57_5q31.1	0.370679	1.43754e-17	1.06354e-15
ENSG00000157168.20	NRG1	HERVH_1p31.3d	0.384173	7.42732e-19	1.099e-15
ENSG00000047936.11	ROS1	HERVH_2q32.1c	0.367973	2.56167e-17	1.29219e-15
ENSG00000198400.12	NTRK1	MER4_Xq21.1a	0.369569	1.82324e-17	1.30538e-15
ENSG00000198400.12	NTRK1	HML2_1q32.2	0.369428	1.879e-17	1.32395e-15
ENSG00000198400.12	NTRK1	HERVL_1p31.1d	0.369248	1.95255e-17	1.35428e-15
ENSG00000047936.11	ROS1	MER4_22q13.31b	0.367351	2.92312e-17	1.45795e-15
ENSG00000047936.11	ROS1	HERVEA_3q25.32	0.367162	3.04213e-17	1.50044e-15
ENSG00000198400.12	NTRK1	MER4_7q21.2	0.368578	2.25221e-17	1.53809e-15
ENSG00000198400.12	NTRK1	MER34B_19p13.11	0.368227	2.42666e-17	1.63211e-15
ENSG00000120217.14	CD274	HERVL40_9p24.1a	0.387242	3.71315e-19	1.64827e-15
ENSG00000047936.11	ROS1	MER4_4q25b	0.36645	3.53727e-17	1.72549e-15
ENSG00000198400.12	NTRK1	HERVH_2q33.2	0.367873	2.6162e-17	1.73333e-15
ENSG00000163599.17	CTLA4	HML6_5q13.2e	0.363686	4.4465e-17	1.76232e-15
ENSG00000198400.12	NTRK1	MER4_22q12.3	0.367447	2.86423e-17	1.86975e-15
ENSG00000163599.17	CTLA4	HERV9_7p14.2	0.363341	6.79886e-17	2.64738e-15
ENSG00000157168.20	NRG1	PABLB_10p15.1b	0.378327	2.72676e-18	3.02603e-15
ENSG00000198400.12	NTRK1	MER34B_4q31.3	0.364912	4.89166e-17	3.10201e-15
ENSG00000047936.11	ROS1	HERVS71_19p13.3	0.363544	6.51648e-17	3.1442e-15
ENSG00000198400.12	NTRK1	HERVH_19q13.41a	0.364122	5.77397e-17	3.60995e-15
ENSG00000198400.12	NTRK1	MER61_5q22.1	0.363598	6.44308e-17	3.97234e-15
ENSG00000047936.11	ROS1	HERVH_3q26.32c	0.362245	8.54547e-17	4.03546e-15
ENSG00000047936.11	ROS1	HERVL40_11q13.4b	0.36158	9.81394e-17	4.58569e-15
ENSG00000047936.11	ROS1	HML3_16p13.3	0.361164	1.06995e-16	4.94739e-15
ENSG00000198400.12	NTRK1	HML2_1q23.3	0.3621	8.80727e-17	5.35555e-15
ENSG00000133703.13	KRAS	MER4_Xq21.31g	0.381843	1.25117e-18	5.55392e-15
ENSG00000047936.11	ROS1	ERVLB4_8q21.13d	0.360313	1.27623e-16	5.8404e-15
ENSG00000198400.12	NTRK1	HERVL_1p22.1b	0.361545	9.88525e-17	5.92981e-15
ENSG00000188389.11	PDCD1	HERVE_2p14a	0.359176	1.61366e-16	6.17503e-15
ENSG00000047936.11	ROS1	HERVH_11q25a	0.359561	1.49052e-16	6.68324e-15
ENSG00000047936.11	ROS1	HERVH_2q31.1a	0.359603	1.47775e-16	6.68324e-15
ENSG00000047936.11	ROS1	HERVIP10F_14q11.2c	0.358831	1.73235e-16	7.6899e-15
ENSG00000188389.11	PDCD1	ERVLE_5q22.2b	0.357971	2.06709e-16	7.77611e-15
ENSG00000188389.11	PDCD1	MER4_10q23.31a	0.357403	2.32269e-16	8.59202e-15
ENSG00000163599.17	CTLA4	HERVL40_9q34.3	0.357377	2.33484e-16	8.78337e-15
ENSG00000198400.12	NTRK1	MER41_1q44a	0.35924	1.59245e-16	9.42516e-15
ENSG00000047936.11	ROS1	ERVLB4_2q37.3b	0.357779	2.15034e-16	9.45087e-15
ENSG00000198400.12	NTRK1	MER4_7p14.3a	0.358894	1.71026e-16	9.98924e-15
ENSG00000188389.11	PDCD1	HARLEQUIN_17q25.3a	0.356521	2.78123e-16	1.01196e-14
ENSG00000198400.12	NTRK1	HML5_Xq11.1	0.355694	3.29185e-16	1.8734e-14
ENSG00000157168.20	NRG1	MER4_Xq21.31g	0.368625	2.22958e-17	1.97943e-14
ENSG00000163599.17	CTLA4	HERVL_11q12.2	0.35241	6.39738e-16	2.3277e-14
ENSG00000047936.11	ROS1	MER4_6q22.1b	0.352488	6.29725e-16	2.71393e-14
ENSG00000047936.11	ROS1	ERV316A3_6p22.1i	0.351939	7.03251e-16	2.97308e-14
ENSG00000047936.11	ROS1	MER34B_1q23.3a	0.351275	8.03317e-16	3.36408e-14
ENSG00000047936.11	ROS1	HERVH_6q25.1	0.350059	1.02441e-15	4.24988e-14
ENSG00000198400.12	NTRK1	HUERSP1_1p13.3	0.350694	9.0246e-16	5.00752e-14
ENSG00000047936.11	ROS1	HERVH_11q13.2b	0.348795	1.31743e-15	5.41487e-14
ENSG00000163599.17	CTLA4	MER4_5p12c	0.34789	1.5761e-15	5.64217e-14
ENSG00000198400.12	NTRK1	ERV316A3_6p21.33b	0.350007	1.03512e-15	5.6727e-14
ENSG00000198400.12	NTRK1	ERVL_5q11.2	0.349673	1.10639e-15	5.98936e-14
ENSG00000047936.11	ROS1	MER4_6p22.3d	0.347781	1.61065e-15	6.55932e-14
ENSG00000047936.11	ROS1	HML5_11q12.2	0.34757	1.67911e-15	6.77599e-14
ENSG00000047936.11	ROS1	ERVLE_2q24.2c	0.347482	1.70864e-15	6.83303e-14
ENSG00000047936.11	ROS1	HERVE_3p26.3	0.347061	1.85689e-15	7.35958e-14
ENSG00000047936.11	ROS1	LTR57_2q37.1	0.346869	1.92831e-15	7.50857e-14
ENSG00000047936.11	ROS1	HERVL_4q32.1a	0.346878	1.92492e-15	7.50857e-14
ENSG00000157764.14	BRAF	HARLEQUIN_7q22.1	0.362271	8.499e-17	7.54541e-14
ENSG00000157168.20	NRG1	MER4_10p15.1	0.361041	1.09757e-16	8.12022e-14
ENSG00000163599.17	CTLA4	ERVLE_11q14.2a	0.345948	2.31203e-15	8.14531e-14
ENSG00000047936.11	ROS1	ERV316A3_21q22.11b	0.346408	2.112e-15	8.15233e-14
ENSG00000047936.11	ROS1	PABLB_14q11.2a	0.346229	2.18754e-15	8.37111e-14
ENSG00000163599.17	CTLA4	HERVL_1q23.3a	0.346914	2.4273e-15	8.48409e-14
ENSG00000047936.11	ROS1	HERVH_3p21.31a	0.345781	2.38899e-15	9.06387e-14
ENSG00000188389.11	PDCD1	MER41_6p21.32	0.345283	2.63403e-15	9.06391e-14
ENSG00000047936.11	ROS1	HERVE_11q13.2b	0.345647	2.45262e-15	9.14888e-14
ENSG00000047936.11	ROS1	HML3_4q31.3	0.345661	2.44602e-15	9.14888e-14
ENSG00000163599.17	CTLA4	HERVE_2p14a	0.345204	2.67544e-15	9.27835e-14
ENSG00000157764.14	BRAF	ERVLB4_7q34b	0.360247	1.29368e-16	9.57105e-14
ENSG00000163599.17	CTLA4	HERVIP10FH_2p14	0.344837	2.87445e-15	9.89124e-14
ENSG00000120217.14	CD274	HARLEQUIN_17q12	0.362833	5.71969e-17	1.26948e-13
ENSG00000047936.11	ROS1	MER34B_1q23.3b	0.343713	3.58097e-15	1.31371e-13
ENSG00000047936.11	ROS1	HERVH_4q31.1a	0.343426	3.78694e-15	1.37789e-13
ENSG00000198400.12	NTRK1	HERVL_Xq11.1a	0.345011	2.77864e-15	1.38588e-13
ENSG00000188389.11	PDCD1	PRIMA41_20q13.33	0.342468	4.5616e-15	1.55761e-13
ENSG00000047936.11	ROS1	HERVL_12q21.2c	0.342604	4.44328e-15	1.5779e-13
ENSG00000047936.11	ROS1	HML2_1q32.2	0.34261	4.43739e-15	1.5779e-13
ENSG00000198400.12	NTRK1	HML6_19p13.2d	0.344181	3.26807e-15	1.59417e-13
ENSG00000188389.11	PDCD1	HERVL_11q12.2	0.341697	5.29686e-15	1.78127e-13
ENSG00000163599.17	CTLA4	HML6_12q24.12a	0.34275	5.67432e-15	1.89386e-13
ENSG00000047936.11	ROS1	HERVH_13q31.1a	0.340874	6.21027e-15	2.18789e-13
ENSG00000047936.11	ROS1	HERVH_6p23	0.340776	6.32939e-15	2.2123e-13
ENSG00000188389.11	PDCD1	HUERSP1_1p13.3	0.340191	7.08472e-15	2.31243e-13
ENSG00000198400.12	NTRK1	HERVL_11q12.2	0.341979	5.01521e-15	2.39382e-13
ENSG00000198400.12	NTRK1	HERVL_1q23.3a	0.341317	5.70071e-15	2.69207e-13
ENSG00000047936.11	ROS1	ERVLE_4q24g	0.339357	8.3167e-15	2.88421e-13
ENSG00000163599.17	CTLA4	PRIMA41_20q13.33	0.338861	9.14588e-15	2.98519e-13
ENSG00000163599.17	CTLA4	HML2_19q13.12b	0.338818	9.22208e-15	2.98809e-13
ENSG00000198400.12	NTRK1	ERVLB4_7q36.1a	0.340556	6.60266e-15	3.05304e-13
ENSG00000133703.13	KRAS	PABLB_10p15.1b	0.359559	1.49122e-16	3.30977e-13
ENSG00000047936.11	ROS1	ERV316A3_6p21.2a	0.338561	9.68735e-15	3.3335e-13
ENSG00000198400.12	NTRK1	ERVLE_20q13.32b	0.339922	7.4612e-15	3.41446e-13
ENSG00000198400.12	NTRK1	HERVL40_11q13.4b	0.339757	7.70065e-15	3.45285e-13
ENSG00000198400.12	NTRK1	PABLB_1q31.3a	0.3398	7.63767e-15	3.45285e-13
ENSG00000157764.14	BRAF	ERVLE_7q22.1c	0.353033	5.64281e-16	3.57835e-13
ENSG00000157764.14	BRAF	PRIMA41_7q32.2	0.351455	7.74853e-16	3.82175e-13
ENSG00000157764.14	BRAF	HERVH_4q35.2c	0.350907	8.64846e-16	3.83905e-13
ENSG00000198400.12	NTRK1	HERVP71A_12p13.33a	0.339012	8.88524e-15	3.90511e-13
ENSG00000163599.17	CTLA4	ERVLE_1p13.3b	0.337118	1.27581e-14	4.10384e-13
ENSG00000198400.12	NTRK1	HERVH_8q22.3a	0.338547	9.71165e-15	4.22647e-13
ENSG00000198400.12	NTRK1	ERV316A3_20q13.33b	0.33837	1.00464e-14	4.32969e-13
ENSG00000198400.12	NTRK1	HERVIP10F_19p13.11	0.337933	1.09218e-14	4.65655e-13
ENSG00000198400.12	NTRK1	HERVH_3p21.31e	0.337717	1.13811e-14	4.76608e-13
ENSG00000047936.11	ROS1	MER41_1q44a	0.336209	1.51636e-14	5.13826e-13
ENSG00000198400.12	NTRK1	HERVL_8q22.2	0.337183	1.26011e-14	5.22768e-13
ENSG00000198400.12	NTRK1	HML2_19q13.12b	0.337031	1.29712e-14	5.3314e-13
ENSG00000047936.11	ROS1	HERVL_11q12.2	0.335889	1.61126e-14	5.37773e-13
ENSG00000047936.11	ROS1	ERVLE_4q21.3	0.335906	1.60615e-14	5.37773e-13
ENSG00000047936.11	ROS1	HERVL40_7q21.12b	0.335542	1.72083e-14	5.70056e-13
ENSG00000163599.17	CTLA4	MER41_6p21.32	0.335124	1.86224e-14	5.86276e-13
ENSG00000146648.19	EGFR	HERVP71A_10q25.1	0.36011	1.33083e-16	5.90753e-13
ENSG00000171094.18	ALK	HERVL74_2q11.2	0.359753	1.43256e-16	6.35913e-13
ENSG00000157168.20	NRG1	HERVH_4q35.1a	0.349854	1.06716e-15	6.76733e-13
ENSG00000198400.12	NTRK1	ERV316A3_15q21.2a	0.335668	1.68019e-14	6.78033e-13
ENSG00000163599.17	CTLA4	HUERSP1_1p13.3	0.334265	2.19018e-14	6.79875e-13
ENSG00000198400.12	NTRK1	HERVH_3p22.3b	0.335513	1.7303e-14	6.85785e-13
ENSG00000047936.11	ROS1	ERVLE_4q21.1b	0.333786	2.39656e-14	7.88023e-13
ENSG00000163599.17	CTLA4	HERVH_2p11.2d	0.33311	2.72144e-14	8.3892e-13
ENSG00000198400.12	NTRK1	ERVLE_2p14b	0.333921	2.33666e-14	9.09862e-13
ENSG00000047936.11	ROS1	ERVLB4_17q21.32	0.332771	2.89995e-14	9.39628e-13
ENSG00000188389.11	PDCD1	HERVL_8q22.2	0.332549	3.02291e-14	9.4076e-13
ENSG00000198400.12	NTRK1	ERV316A3_9q34.2b	0.333343	2.60481e-14	9.96791e-13
ENSG00000198400.12	NTRK1	MER61_2q31.1b	0.332929	2.81498e-14	1.05896e-12
ENSG00000047936.11	ROS1	HERVL_4q34.1c	0.331285	3.82834e-14	1.23145e-12
ENSG00000188389.11	PDCD1	HERV9_7p14.2	0.330982	4.0504e-14	1.24859e-12
ENSG00000157764.14	BRAF	MER101_7q22.1b	0.344426	3.11556e-15	1.25727e-12
ENSG00000198400.12	NTRK1	ERVLB4_3p21.31a	0.331476	3.69425e-14	1.36657e-12
ENSG00000163599.17	CTLA4	ERV316A3_21q22.11b	0.331983	4.54841e-14	1.3829e-12
ENSG00000198400.12	NTRK1	HERVL_Xq22.3b	0.33126	3.84592e-14	1.41091e-12
ENSG00000198400.12	NTRK1	ERVLE_1q32.1e	0.330518	4.4156e-14	1.60663e-12
ENSG00000047936.11	ROS1	HERVL_8q22.2	0.329614	5.22132e-14	1.66744e-12
ENSG00000047936.11	ROS1	PABLB_1q31.3a	0.329463	5.37013e-14	1.70272e-12
ENSG00000047936.11	ROS1	HERVH_15q25.3a	0.329003	5.84671e-14	1.84068e-12
ENSG00000163599.17	CTLA4	HERVH_8q22.3a	0.328604	6.29339e-14	1.87492e-12
ENSG00000198400.12	NTRK1	HML6_5q13.2e	0.329067	5.77751e-14	2.08507e-12
ENSG00000188389.11	PDCD1	ERVLE_11q14.2a	0.327974	7.06899e-14	2.16409e-12
ENSG00000188389.11	PDCD1	HML6_5q13.2e	0.329467	7.2616e-14	2.20783e-12
ENSG00000198400.12	NTRK1	HERVL_6q22.33b	0.328197	6.78441e-14	2.39016e-12
ENSG00000198400.12	NTRK1	ERVLB4_12p13.31e	0.328231	6.74228e-14	2.39016e-12
ENSG00000198400.12	NTRK1	HML3_13q12.11b	0.327681	7.46044e-14	2.58726e-12
ENSG00000047936.11	ROS1	HERVEA_21q22.11	0.326852	8.68817e-14	2.71597e-12
ENSG00000047936.11	ROS1	HERVW_1p33c	0.326768	8.82298e-14	2.73883e-12
ENSG00000163599.17	CTLA4	MER34B_7q36.1	0.325944	1.02583e-13	3.01567e-12
ENSG00000198400.12	NTRK1	HERV9_10p13	0.326686	8.95642e-14	3.08198e-12
ENSG00000188389.11	PDCD1	HERVS71_11q13.2	0.325695	1.07366e-13	3.22026e-12
ENSG00000157168.20	NRG1	HERVH_6q22.31g	0.34114	5.90007e-15	3.2738e-12
ENSG00000047936.11	ROS1	MER101_1p35.2	0.325689	1.07483e-13	3.31333e-12
ENSG00000198400.12	NTRK1	MER4_10q23.31a	0.325728	1.06716e-13	3.64394e-12
ENSG00000198400.12	NTRK1	LTR25_2p13.3	0.32567	1.07855e-13	3.65472e-12
ENSG00000198400.12	NTRK1	HERVFRD_6p24.2	0.325267	1.16075e-13	3.84519e-12
ENSG00000188389.11	PDCD1	MER101_1p22.2a	0.324159	1.41993e-13	4.23026e-12
ENSG00000188389.11	PDCD1	HERVW_5p14.3	0.324057	1.44649e-13	4.28066e-12
ENSG00000047936.11	ROS1	ERVLB4_2q32.3	0.324194	1.41086e-13	4.31919e-12
ENSG00000198400.12	NTRK1	ERVLB4_14q23.3	0.324417	1.35493e-13	4.45522e-12
ENSG00000188389.11	PDCD1	MER61_2q31.1b	0.323579	1.57748e-13	4.60686e-12
ENSG00000163599.17	CTLA4	HERVS71_1p35.1	0.32291	1.78061e-13	5.09943e-12
ENSG00000047936.11	ROS1	LTR57_5q31.1	0.323192	1.69191e-13	5.14412e-12
ENSG00000188389.11	PDCD1	HERVH_2p11.2d	0.322857	1.79764e-13	5.21552e-12
ENSG00000157764.14	BRAF	HML1_6q14.1	0.336443	1.45064e-14	5.36617e-12
ENSG00000198400.12	NTRK1	MER4_8q24.3b	0.323274	1.66713e-13	5.40175e-12
ENSG00000198400.12	NTRK1	HERVL_17q12a	0.323223	1.68264e-13	5.41248e-12
ENSG00000188389.11	PDCD1	ERV316A3_6p22.1k	0.322607	1.88057e-13	5.42069e-12
ENSG00000198400.12	NTRK1	HML6_12q24.12a	0.323098	1.72099e-13	5.49603e-12
ENSG00000198400.12	NTRK1	ERV316A3_19q13.2	0.323051	1.73554e-13	5.50289e-12
ENSG00000047936.11	ROS1	MER4_7p14.3a	0.32265	1.86604e-13	5.63492e-12
ENSG00000157168.20	NRG1	ERV316A3_12q21.33e	0.337593	1.16538e-14	5.74793e-12
ENSG00000157168.20	NRG1	HERVH_11p11.12	0.336652	1.39397e-14	6.18782e-12
ENSG00000163599.17	CTLA4	ERV316A3_10q22.1a	0.32153	2.2834e-13	6.45605e-12
ENSG00000198400.12	NTRK1	MER41_6p22.3	0.3216	2.2546e-13	7.09798e-12
ENSG00000198400.12	NTRK1	HERVE_3p26.3	0.320792	2.60674e-13	8.09184e-12
ENSG00000163599.17	CTLA4	MER41_22q12.3c	0.320062	2.97098e-13	8.34695e-12
ENSG00000047936.11	ROS1	HERVH_8p11.23	0.320066	2.96892e-13	8.845e-12
ENSG00000047936.11	ROS1	HERVL40_3q12.2	0.319591	3.23133e-13	9.56258e-12
ENSG00000047936.11	ROS1	HERVH_9p24.2a	0.31953	3.2667e-13	9.60324e-12
ENSG00000163599.17	CTLA4	ERVLE_8q21.3f	0.319204	3.46276e-13	9.66742e-12
ENSG00000047936.11	ROS1	HERVL40_4q31.3b	0.31913	3.50845e-13	1.0246e-11
ENSG00000163599.17	CTLA4	HARLEQUIN_17q25.3a	0.318784	3.73151e-13	1.03526e-11
ENSG00000157168.20	NRG1	MER101_21q21.3c	0.333399	2.57749e-14	1.04013e-11
ENSG00000198400.12	NTRK1	HERVH_7q11.23a	0.319109	3.5216e-13	1.07071e-11
ENSG00000157168.20	NRG1	MER4_3p25.1a	0.33275	2.91141e-14	1.07698e-11
ENSG00000198400.12	NTRK1	HERVH_12p11.22a	0.318872	3.67343e-13	1.10178e-11
ENSG00000188389.11	PDCD1	MER34B_7q36.1	0.318333	4.0434e-13	1.15055e-11
ENSG00000120217.14	CD274	MER4_10p15.1	0.339554	8.00739e-15	1.18483e-11
ENSG00000120217.14	CD274	MER4B_19q13.42a	0.337451	1.19752e-14	1.32894e-11
ENSG00000047936.11	ROS1	HERVEA_19q13.33	0.317533	4.65995e-13	1.34322e-11
ENSG00000198400.12	NTRK1	HERVL_12p13.1c	0.317579	4.62167e-13	1.36771e-11
ENSG00000047936.11	ROS1	HERVIP10FH_2q14.2	0.317218	4.92693e-13	1.41101e-11
ENSG00000188389.11	PDCD1	ERV316A3_10q22.1a	0.317031	5.09207e-13	1.43061e-11
ENSG00000157168.20	NRG1	HERVL_8q22.2	-0.330251	4.63993e-14	1.58436e-11
ENSG00000133703.13	KRAS	HERV4_4q12	-0.339517	1.07657e-14	1.59296e-11
ENSG00000047936.11	ROS1	ERVLE_5q31.1c	0.316224	5.87229e-13	1.64981e-11
ENSG00000198400.12	NTRK1	MER61_1q42.12	0.316204	5.8933e-13	1.68776e-11
ENSG00000188389.11	PDCD1	ERVLB4_14q23.3	0.315916	6.19964e-13	1.72001e-11
ENSG00000188389.11	PDCD1	HERVL40_4q31.3b	0.315813	6.31257e-13	1.74047e-11
ENSG00000163599.17	CTLA4	HERVL66_5q15	0.315668	6.47622e-13	1.76368e-11
ENSG00000047936.11	ROS1	HERVIP10F_3p25.3	0.315435	6.74661e-13	1.87176e-11
ENSG00000047936.11	ROS1	ERVLB4_14q23.3	0.314883	7.43338e-13	2.04949e-11
ENSG00000157168.20	NRG1	HERVH_8q22.2	0.328345	6.60208e-14	2.09333e-11
ENSG00000047936.11	ROS1	ERVLE_11q23.3c	0.314685	7.69653e-13	2.096e-11
ENSG00000157764.14	BRAF	ERV316A3_7q31.1c	-0.329805	6.82214e-14	2.1631e-11
ENSG00000198400.12	NTRK1	HERVL74_10p11.22	0.314596	7.8165e-13	2.21003e-11
ENSG00000198400.12	NTRK1	MER4B_12p13.31c	0.314617	7.78864e-13	2.21003e-11
ENSG00000188389.11	PDCD1	HERVH_12p11.22a	0.314176	8.41276e-13	2.26329e-11
ENSG00000163599.17	CTLA4	HERV3_21q22.13	0.313948	8.75561e-13	2.34134e-11
ENSG00000198400.12	NTRK1	ERV316A3_12q24.13	0.31374	9.07924e-13	2.55081e-11
ENSG00000188389.11	PDCD1	ERV316A3_21q22.11b	0.315011	9.59842e-13	2.56671e-11
ENSG00000188389.11	PDCD1	ERVLE_8p23.1b	0.31287	1.05669e-12	2.79206e-11
ENSG00000198400.12	NTRK1	HUERSP1_14q23.1	0.312964	1.03948e-12	2.90204e-11
ENSG00000188389.11	PDCD1	HERVH_8q22.3a	0.312587	1.10997e-12	2.91548e-11
ENSG00000047936.11	ROS1	ERVLE_8q21.3f	0.312401	1.14656e-12	3.08458e-11
ENSG00000198400.12	NTRK1	HERVH_4p16.1d	0.312535	1.1201e-12	3.10757e-11
ENSG00000047936.11	ROS1	MER4_5p13.2b	0.311838	1.26407e-12	3.38024e-11
ENSG00000198400.12	NTRK1	HERVK11_1q23.3a	0.311897	1.25134e-12	3.45011e-11
ENSG00000163599.17	CTLA4	ERVLB4_14q23.3	0.311575	1.32312e-12	3.47533e-11
ENSG00000047936.11	ROS1	LTR25_3p22.1	0.311408	1.36187e-12	3.61996e-11
ENSG00000163599.17	CTLA4	HERVFRD_9q22.31	0.311215	1.40827e-12	3.67725e-11
ENSG00000163599.17	CTLA4	MER4_7p14.3a	0.312703	1.42811e-12	3.70723e-11
ENSG00000163599.17	CTLA4	HUERSP3B_3q23	0.311062	1.44588e-12	3.73156e-11
ENSG00000163599.17	CTLA4	HERVH_3p21.31e	0.310727	1.53209e-12	3.90859e-11
ENSG00000163599.17	CTLA4	MER61_2q31.1b	0.31058	1.57133e-12	3.9858e-11
ENSG00000198400.12	NTRK1	HERV9_15q21.1a	0.309299	1.95917e-12	5.30291e-11
ENSG00000047936.11	ROS1	HERVE_4p16.1c	0.308679	2.1791e-12	5.72368e-11
ENSG00000198400.12	NTRK1	HERVIP10F_19q13.41a	0.308447	2.26713e-12	6.09927e-11
ENSG00000133703.13	KRAS	MER4_Xq21.31f	0.327922	7.13716e-14	6.33637e-11
ENSG00000047936.11	ROS1	HERVL_3q25.32	0.307795	2.53454e-12	6.61813e-11
ENSG00000198400.12	NTRK1	MER61_2q35	0.307673	2.58788e-12	6.83786e-11
ENSG00000157168.20	NRG1	MER4_Xq21.31f	0.321348	2.3591e-13	6.98136e-11
ENSG00000198400.12	NTRK1	ERVLB4_4q32.1b	0.307276	2.76933e-12	7.2312e-11
ENSG00000133703.13	KRAS	HERVH_1q42.2a	0.32617	9.84341e-14	7.28248e-11
ENSG00000120217.14	CD274	MER41_6p22.3	0.32879	8.2269e-14	7.30384e-11
ENSG00000163599.17	CTLA4	HERVH_12p11.22a	0.306797	3.00463e-12	7.493e-11
ENSG00000163599.17	CTLA4	MER41_1q44b	0.306758	3.02433e-12	7.49999e-11
ENSG00000198400.12	NTRK1	ERVLE_5q31.1c	0.306935	2.93466e-12	7.6181e-11
ENSG00000198400.12	NTRK1	HERVP71A_12p13.33b	0.306736	3.03584e-12	7.83494e-11
ENSG00000146648.19	EGFR	HML1_10q22.1	0.331631	3.58873e-14	7.96519e-11
ENSG00000163599.17	CTLA4	HERVS71_11q13.2	0.306161	3.34717e-12	8.20888e-11
ENSG00000163599.17	CTLA4	MER34B_4q31.3	0.30593	3.48112e-12	8.49049e-11
ENSG00000198400.12	NTRK1	HML1_6q22.32	0.306142	3.35831e-12	8.5186e-11
ENSG00000198400.12	NTRK1	HUERSP1_15q21.1a	0.305801	3.55798e-12	8.9738e-11
ENSG00000171094.18	ALK	HERVH_11q13.4a	0.3288	6.06973e-14	8.98118e-11
ENSG00000198400.12	NTRK1	HERVS71_1p35.1	0.305759	3.58349e-12	8.98707e-11
ENSG00000047936.11	ROS1	ERVLB4_15q21.2	0.305675	3.63474e-12	9.38058e-11
ENSG00000198400.12	NTRK1	HERVH_2p11.2c	0.305394	3.81213e-12	9.45366e-11
ENSG00000188389.11	PDCD1	MER4_5p12c	0.305585	3.69045e-12	9.46932e-11
ENSG00000047936.11	ROS1	ERV316A3_20q13.33b	0.305431	3.78844e-12	9.72074e-11
ENSG00000157764.14	BRAF	MER4_22q12.3	-0.320597	3.61062e-13	1.00172e-10
ENSG00000188389.11	PDCD1	ERVLE_1p13.3b	0.305193	3.94391e-12	1.00615e-10
ENSG00000157764.14	BRAF	MER41_6p22.3	-0.319705	4.22723e-13	1.1038e-10
ENSG00000047936.11	ROS1	HML3_5p15.33d	0.304643	4.32734e-12	1.10397e-10
ENSG00000157764.14	BRAF	HERVH_3p21.31b	0.317653	4.56133e-13	1.12488e-10
ENSG00000198400.12	NTRK1	ERVLB4_17q12	0.303979	4.84023e-12	1.17409e-10
ENSG00000163599.17	CTLA4	HERVP71A_8q24.13	0.303831	4.96227e-12	1.18427e-10
ENSG00000198400.12	NTRK1	ERVLE_4q21.3	0.303799	4.98872e-12	1.20353e-10
ENSG00000047936.11	ROS1	ERVLB4_11p15.5c	0.304063	4.77207e-12	1.20359e-10
ENSG00000198400.12	NTRK1	LTR25_3p22.1	0.30376	5.02175e-12	1.20495e-10
ENSG00000133703.13	KRAS	PABLA_6p12.2	0.322394	1.95414e-13	1.2392e-10
ENSG00000198400.12	NTRK1	HERV9_1p31.1	0.303526	5.22302e-12	1.2465e-10
ENSG00000047936.11	ROS1	HERVP71A_12p13.33a	0.303635	5.12783e-12	1.28601e-10
ENSG00000188389.11	PDCD1	HERVL66_5q15	0.303543	5.20788e-12	1.31351e-10
ENSG00000198400.12	NTRK1	HERV3_7q33	0.3027	5.99908e-12	1.42406e-10
ENSG00000157168.20	NRG1	HERVL_10q23.33a	0.316723	5.37764e-13	1.49196e-10
ENSG00000198400.12	NTRK1	HML6_19q13.41a	0.302238	6.48137e-12	1.53036e-10
ENSG00000198400.12	NTRK1	MER4_15q22.31b	0.302095	6.63792e-12	1.55083e-10
ENSG00000198400.12	NTRK1	MER4_8q24.3c	0.301958	6.79112e-12	1.57831e-10
ENSG00000198400.12	NTRK1	HML2_4p16.1b	0.301805	6.96677e-12	1.6107e-10
ENSG00000157168.20	NRG1	HERVH_5q31.1d	0.315937	6.17626e-13	1.61273e-10
ENSG00000047936.11	ROS1	ERV316A3_6p25.1b	0.302033	6.70677e-12	1.65396e-10
ENSG00000047936.11	ROS1	HERVEA_19p12a	0.30187	6.89142e-12	1.69011e-10
ENSG00000163599.17	CTLA4	MER61_1q42.12	0.301651	7.14839e-12	1.69688e-10
ENSG00000157764.14	BRAF	MER101_7q22.1a	0.314669	7.71731e-13	1.71286e-10
ENSG00000171094.18	ALK	HML5_1q42.12	0.321999	2.09833e-13	1.8629e-10
ENSG00000171094.18	ALK	MER41_9p13.3a	0.322122	2.05236e-13	1.8629e-10
ENSG00000047936.11	ROS1	HERVL18_15q21.3	0.300995	7.97398e-12	1.94486e-10
ENSG00000198400.12	NTRK1	HML5_12q15	0.300499	8.65974e-12	1.96125e-10
ENSG00000047936.11	ROS1	HML3_1p21.3	0.300819	8.21001e-12	1.99149e-10
ENSG00000198400.12	NTRK1	MER61_3p11.2	0.300277	8.98408e-12	2.02438e-10
ENSG00000198400.12	NTRK1	MER4_5p12c	0.299745	9.81269e-12	2.19993e-10
ENSG00000198400.12	NTRK1	MER101_2q35a	0.299706	9.8759e-12	2.20297e-10
ENSG00000198400.12	NTRK1	HML6_19q13.41f	0.299569	1.0102e-11	2.24215e-10
ENSG00000047936.11	ROS1	HML2_1q23.3	0.29997	9.45302e-12	2.28054e-10
ENSG00000047936.11	ROS1	PABLA_7q21.13	0.299539	1.01526e-11	2.42299e-10
ENSG00000198400.12	NTRK1	HERVH_12q13.2b	0.298888	1.13055e-11	2.44806e-10
ENSG00000157168.20	NRG1	HERVP71A_10q25.1	0.312582	1.11099e-12	2.59561e-10
ENSG00000157168.20	NRG1	ERVLB4_9q21.33a	0.312621	1.10346e-12	2.59561e-10
ENSG00000157764.14	BRAF	HERVH_3q25.1	0.311989	1.23148e-12	2.60311e-10
ENSG00000157168.20	NRG1	MER4_6p12.1	0.312094	1.2093e-12	2.68405e-10
ENSG00000047936.11	ROS1	HERVH_5q23.2f	0.298693	1.16756e-11	2.77155e-10
ENSG00000157764.14	BRAF	HERV3_7q34c	0.311008	1.4594e-12	2.81665e-10
ENSG00000188389.11	PDCD1	HML3_Xq21.1a	0.297947	1.32009e-11	3.29206e-10
ENSG00000198400.12	NTRK1	HERVIP10FH_2p14	0.296924	1.56136e-11	3.30041e-10
ENSG00000047936.11	ROS1	HERVE_11p15.4	0.297424	1.43852e-11	3.39659e-10
ENSG00000198400.12	NTRK1	HERVL18_11q12.2	0.29651	1.67088e-11	3.49861e-10
ENSG00000188389.11	PDCD1	HERVH_3p22.3b	0.297472	1.42717e-11	3.51957e-10
ENSG00000047936.11	ROS1	HERVP71A_12p13.33b	0.297023	1.53616e-11	3.60794e-10
ENSG00000188389.11	PDCD1	HML2_19q13.12b	0.297281	1.4727e-11	3.61176e-10
ENSG00000133703.13	KRAS	HERVH_6q12c	0.314872	7.44723e-13	3.67314e-10
ENSG00000198400.12	NTRK1	HML5_8p21.2	0.296068	1.79597e-11	3.72538e-10
ENSG00000198400.12	NTRK1	HERVH_2p22.2c	0.296021	1.80973e-11	3.73646e-10
ENSG00000163599.17	CTLA4	HERVK14C_7q36.1	0.296627	1.63918e-11	3.77011e-10
ENSG00000047936.11	ROS1	HERV3_19q13.33	0.296524	1.66688e-11	3.89436e-10
ENSG00000198400.12	NTRK1	ERVL_Xq21.1a	0.295512	1.96639e-11	4.0225e-10
ENSG00000047936.11	ROS1	HERVEA_12p13.31	0.296001	1.81563e-11	4.21967e-10
ENSG00000198400.12	NTRK1	ERV316A3_6p22.1i	0.295175	2.07716e-11	4.22959e-10
ENSG00000163599.17	CTLA4	HERVH_7q11.23a	0.29581	1.87304e-11	4.2858e-10
ENSG00000198400.12	NTRK1	HERVW_11q14.1	0.294859	2.18672e-11	4.41221e-10
ENSG00000120217.14	CD274	ERV316A3_6q22.31f	0.314416	8.06758e-13	4.4765e-10
ENSG00000047936.11	ROS1	HML3_4q34.1a	0.295537	1.95842e-11	4.52782e-10
ENSG00000163599.17	CTLA4	MER61_11q13.4	0.295256	2.04985e-11	4.66631e-10
ENSG00000188389.11	PDCD1	ERVLE_8q21.3f	0.29559	1.94159e-11	4.73555e-10
ENSG00000157168.20	NRG1	HERVH_19q13.32a	0.308359	2.30154e-12	4.86502e-10
ENSG00000163599.17	CTLA4	HERVL_8q22.2	0.294876	2.18058e-11	4.93856e-10
ENSG00000198400.12	NTRK1	ERVLE_1p13.3b	0.293788	2.60137e-11	5.22511e-10
ENSG00000198400.12	NTRK1	HERVH_3p21.31a	0.293707	2.6356e-11	5.27001e-10
ENSG00000157764.14	BRAF	HERVL_7q36.1b	-0.307864	3.24506e-12	5.33511e-10
ENSG00000198400.12	NTRK1	PABLA_16p13.3a	0.293575	2.69247e-11	5.35959e-10
ENSG00000198400.12	NTRK1	PABLA_16p13.3b	0.293236	2.84417e-11	5.58641e-10
ENSG00000198400.12	NTRK1	ERVLE_5q31.1b	0.292917	2.99426e-11	5.80415e-10
ENSG00000171094.18	ALK	HERVH_11q13.2d	0.313502	9.46503e-13	6.00218e-10
ENSG00000198400.12	NTRK1	HERVL40_2q37.3	0.292569	3.16673e-11	6.07196e-10
ENSG00000047936.11	ROS1	HML3_5p15.33c	0.293541	2.70747e-11	6.19508e-10
ENSG00000163599.17	CTLA4	HERVW_5p14.3	0.293298	2.81575e-11	6.29181e-10
ENSG00000047936.11	ROS1	MER4_7p22.1	0.293193	2.86389e-11	6.5194e-10
ENSG00000047936.11	ROS1	HERVL18_4p15.2b	0.293032	2.93931e-11	6.65693e-10
ENSG00000198400.12	NTRK1	HERVH_8q22.1a	0.291797	3.58517e-11	6.8011e-10
ENSG00000198400.12	NTRK1	HERVL40_9q34.3	0.291689	3.64792e-11	6.89069e-10
ENSG00000163599.17	CTLA4	HERVE_3p26.3	0.29268	3.11078e-11	6.90437e-10
ENSG00000163599.17	CTLA4	HERVL_1p31.1d	0.2926	3.15098e-11	6.95881e-10
ENSG00000157168.20	NRG1	HERVH_19q13.31	0.305876	3.51335e-12	7.08899e-10
ENSG00000157764.14	BRAF	HERVW_7q31.32	0.304123	4.7243e-12	7.23144e-10
ENSG00000047936.11	ROS1	HERVL_Xq22.3b	0.292462	3.22172e-11	7.25949e-10
ENSG00000047936.11	ROS1	HERV3_7q33	0.292335	3.28846e-11	7.33542e-10
ENSG00000047936.11	ROS1	HERVK11D_2q31.1	0.292352	3.27938e-11	7.33542e-10
ENSG00000163599.17	CTLA4	MER101_1p22.2a	0.292102	3.41367e-11	7.41029e-10
ENSG00000163599.17	CTLA4	ERVLE_7p22.3	0.292121	3.40341e-11	7.41029e-10
ENSG00000047936.11	ROS1	HERVL40_4q31.3a	0.292021	3.4588e-11	7.6768e-10
ENSG00000157764.14	BRAF	HARLEQUIN_Xq23a	0.303435	5.30333e-12	7.84716e-10
ENSG00000198400.12	NTRK1	PABLB_10p15.1b	-0.290823	4.19107e-11	7.84986e-10
ENSG00000163599.17	CTLA4	ERVLE_6p21.32	0.291594	3.70418e-11	7.98197e-10
ENSG00000157168.20	NRG1	HERVH_8q21.3b	0.30434	4.55442e-12	8.08684e-10
ENSG00000157168.20	NRG1	HERVH_4q34.3c	0.304533	4.40864e-12	8.08684e-10
ENSG00000188389.11	PDCD1	MER41_1q44b	0.29209	3.42037e-11	8.25165e-10
ENSG00000198400.12	NTRK1	MER4_19q13.41b	0.290285	4.56702e-11	8.51807e-10
ENSG00000047936.11	ROS1	HERVH_4q22.3a	0.291307	3.87816e-11	8.56476e-10
ENSG00000198400.12	NTRK1	ERVLE_11q23.3c	0.29011	4.69648e-11	8.72288e-10
ENSG00000157168.20	NRG1	HERVH_19q13.32b	0.303543	5.20775e-12	8.89123e-10
ENSG00000157764.14	BRAF	MER101_2q33.1	0.302474	6.22976e-12	8.92061e-10
ENSG00000047936.11	ROS1	HERVH_19q13.2a	0.290983	4.08509e-11	8.97708e-10
ENSG00000198400.12	NTRK1	HERVH_6p21.2b	0.289727	4.99208e-11	9.11927e-10
ENSG00000163599.17	CTLA4	HERVL18_11q12.2	0.290666	4.29713e-11	9.21496e-10
ENSG00000188389.11	PDCD1	ERVLE_12p11.21b	0.291299	3.88345e-11	9.31817e-10
ENSG00000047936.11	ROS1	ERV316A3_22q13.1	0.29067	4.29482e-11	9.39148e-10
ENSG00000198400.12	NTRK1	ERVLE_5q13.2a	0.289498	5.17674e-11	9.41785e-10
ENSG00000198400.12	NTRK1	HML3_Xq21.1a	0.289376	5.27807e-11	9.52413e-10
ENSG00000198400.12	NTRK1	ERVLE_12q14.3a	0.289385	5.27059e-11	9.52413e-10
ENSG00000157168.20	NRG1	HERVH_8q22.3b	0.302451	6.25382e-12	1.02817e-09
ENSG00000047936.11	ROS1	HERVH_13q13.3b	0.289915	4.84437e-11	1.04898e-09
ENSG00000198400.12	NTRK1	LTR25_12p11.22b	0.288461	6.10315e-11	1.08803e-09
ENSG00000157168.20	NRG1	HERVK11_12q23.3b	0.301692	7.10019e-12	1.12563e-09
ENSG00000120217.14	CD274	MER4_22q12.3	0.307908	3.22104e-12	1.29983e-09
ENSG00000198400.12	NTRK1	HERVIP10FH_6q22.1	0.286874	7.842e-11	1.38108e-09
ENSG00000188389.11	PDCD1	MER61_11q13.4	0.288623	5.94857e-11	1.41966e-09
ENSG00000047936.11	ROS1	ERV316A3_4q31.1b	0.287792	6.78485e-11	1.44798e-09
ENSG00000157764.14	BRAF	MER4_2p11.2d	0.299153	1.08207e-11	1.50104e-09
ENSG00000198400.12	NTRK1	HERVS71_11q13.2	0.28622	8.69165e-11	1.51303e-09
ENSG00000198400.12	NTRK1	HERVL18_2q31.1	0.286192	8.72927e-11	1.51364e-09
ENSG00000198400.12	NTRK1	ERVLE_5q22.3e	0.286161	8.77189e-11	1.51511e-09
ENSG00000047936.11	ROS1	ERV316A3_9q32a	0.287407	7.20995e-11	1.53134e-09
ENSG00000198400.12	NTRK1	HUERSP2_14q31.3	0.285628	9.53732e-11	1.64094e-09
ENSG00000047936.11	ROS1	ERVLB4_4q23b	0.286877	7.83859e-11	1.65693e-09
ENSG00000171094.18	ALK	ERVLE_5q31.1h	0.30674	3.03364e-12	1.68329e-09
ENSG00000171094.18	ALK	MER41_22q12.3e	0.305963	3.46176e-12	1.70742e-09
ENSG00000120217.14	CD274	HERVL_10q23.33a	0.303256	5.46528e-12	1.73289e-09
ENSG00000120217.14	CD274	ERV316A3_6q22.33	0.303411	5.32515e-12	1.73289e-09
ENSG00000120217.14	CD274	HERVEA_12p13.31	0.303487	5.25762e-12	1.73289e-09
ENSG00000188389.11	PDCD1	ERVLE_3p24.3a	0.287139	7.52095e-11	1.76643e-09
ENSG00000198400.12	NTRK1	MER4_1p21.3	0.284949	1.06068e-10	1.8179e-09
ENSG00000157168.20	NRG1	ERV316A3_3q25.2b	0.2981	1.28722e-11	1.97034e-09
ENSG00000047936.11	ROS1	HUERSP2_14q31.3	0.285271	1.00848e-10	2.11163e-09
ENSG00000198400.12	NTRK1	MER4_6p22.3d	0.283915	1.24612e-10	2.12752e-09
ENSG00000047936.11	ROS1	ERVLB4_2q37.1a	0.284157	1.20002e-10	2.50088e-09
ENSG00000188389.11	PDCD1	HERVH_6p21.32	0.284749	1.0943e-10	2.55664e-09
ENSG00000047936.11	ROS1	HUERSP1_11p15.4b	0.283941	1.24118e-10	2.57459e-09
ENSG00000188389.11	PDCD1	HARLEQUIN_10q23.1	-0.284495	1.13845e-10	2.64584e-09
ENSG00000163599.17	CTLA4	ERV316A3_6p22.1n	0.28496	1.28493e-10	2.67784e-09
ENSG00000047936.11	ROS1	HERV9_1p31.1	0.283578	1.31326e-10	2.71142e-09
ENSG00000198400.12	NTRK1	HERVL66_5q15	0.282128	1.64392e-10	2.75372e-09
ENSG00000163599.17	CTLA4	ERV316A3_19q13.2	0.283353	1.35985e-10	2.82073e-09
ENSG00000198400.12	NTRK1	HERVH48_8q21.2	0.281899	1.70322e-10	2.84233e-09
ENSG00000157764.14	BRAF	HERVH_11q13.4a	0.294289	2.39859e-11	2.95759e-09
ENSG00000157764.14	BRAF	ERVLE_7q34b	0.293946	2.53544e-11	2.9618e-09
ENSG00000157764.14	BRAF	MER4B_12p12.1a	0.293953	2.53255e-11	2.9618e-09
ENSG00000198400.12	NTRK1	HML6_4q21.1	0.281414	1.83546e-10	3.05154e-09
ENSG00000047936.11	ROS1	LTR19_6q25.3a	0.282743	1.49473e-10	3.05765e-09
ENSG00000188389.11	PDCD1	ERV316A3_19q13.2	0.283375	1.35527e-10	3.11712e-09
ENSG00000163599.17	CTLA4	MER61_4q21.1b	0.282526	1.54603e-10	3.192e-09
ENSG00000163599.17	CTLA4	HERVL_1p22.1b	0.283717	1.55434e-10	3.19431e-09
ENSG00000171094.18	ALK	ERVL_17q12	0.300769	8.27915e-12	3.34101e-09
ENSG00000198400.12	NTRK1	ERVLE_Xp11.22a	0.280664	2.05996e-10	3.37422e-09
ENSG00000120217.14	CD274	HERVL74_19q13.41a	0.298776	1.1517e-11	3.40826e-09
ENSG00000047936.11	ROS1	HERVL_12p13.1c	0.281981	1.68188e-10	3.40907e-09
ENSG00000133703.13	KRAS	ERV316A3_12q21.33e	0.30106	7.88834e-12	3.4498e-09
ENSG00000133703.13	KRAS	HERVL_1p22.1b	-0.301424	9.44142e-12	3.49254e-09
ENSG00000198400.12	NTRK1	MER41_22q12.3c	0.280321	2.17142e-10	3.54372e-09
ENSG00000188389.11	PDCD1	HERVS71_1p35.1	0.282296	1.60187e-10	3.66531e-09
ENSG00000171094.18	ALK	MER4_Xq21.31f	0.29938	1.04226e-11	3.72894e-09
ENSG00000198400.12	NTRK1	HERVH_13q13.3a	0.279893	2.31856e-10	3.77e-09
ENSG00000188389.11	PDCD1	HERV3_11q13.3	0.283278	1.66194e-10	3.78326e-09
ENSG00000157764.14	BRAF	HERVH_15q25.2	0.292012	3.46386e-11	3.84402e-09
ENSG00000157764.14	BRAF	ERVLE_22q13.2a	0.292053	3.44102e-11	3.84402e-09
ENSG00000047936.11	ROS1	MER41_5q31.3a	0.281095	1.92778e-10	3.87213e-09
ENSG00000047936.11	ROS1	ERVLB4_4q31.23	0.281096	1.92759e-10	3.87213e-09
ENSG00000171094.18	ALK	HERVH_11p15.4b	0.29834	1.23736e-11	3.92332e-09
ENSG00000047936.11	ROS1	ERVLE_11q13.5a	0.28077	2.02654e-10	4.05217e-09
ENSG00000198400.12	NTRK1	ERV316A3_2q35f	0.279143	2.60039e-10	4.18229e-09
ENSG00000188389.11	PDCD1	HUERSP3B_3q23	0.281355	1.85222e-10	4.1949e-09
ENSG00000047936.11	ROS1	HML2_11q23.3	0.28042	2.13856e-10	4.25698e-09
ENSG00000157764.14	BRAF	HML2_15q25.2	0.291173	3.96261e-11	4.29025e-09
ENSG00000047936.11	ROS1	ERVLE_8q24.22b	0.280028	2.27101e-10	4.50045e-09
ENSG00000047936.11	ROS1	HML6_19p12e	0.279971	2.29094e-10	4.51977e-09
ENSG00000047936.11	ROS1	ERVLE_17p11.2c	0.279755	2.36817e-10	4.65147e-09
ENSG00000157168.20	NRG1	MER4_3p25.1b	0.292196	3.36253e-11	4.81524e-09
ENSG00000157168.20	NRG1	HML3_12q13.12	0.291927	3.51138e-11	4.87094e-09
ENSG00000171094.18	ALK	ERVLE_22q13.2a	0.296577	1.65246e-11	4.89017e-09
ENSG00000120217.14	CD274	HERVW_8q24.13	-0.296178	1.76385e-11	4.89359e-09
ENSG00000198400.12	NTRK1	HUERSP1_15q22.31	0.277893	3.14557e-10	5.02272e-09
ENSG00000146648.19	EGFR	ERV316A3_22q12.3b	0.305605	3.67836e-12	5.44275e-09
ENSG00000146648.19	EGFR	ERVLE_11p15.3	0.301319	7.5554e-12	5.58973e-09
ENSG00000146648.19	EGFR	HERVL_5p15.32a	0.302222	6.49869e-12	5.58973e-09
ENSG00000188389.11	PDCD1	HERVL18_11q12.2	0.279362	2.51482e-10	5.60969e-09
ENSG00000047936.11	ROS1	HML6_8q12.1	0.27843	2.89859e-10	5.66821e-09
ENSG00000188389.11	PDCD1	HERVS71_4p16.1b	0.279192	2.58101e-10	5.72855e-09
ENSG00000188389.11	PDCD1	HERVH_3p21.31e	0.278984	2.6642e-10	5.88378e-09
ENSG00000198400.12	NTRK1	HERVS71_4p16.1b	0.276672	3.78453e-10	5.95728e-09
ENSG00000198400.12	NTRK1	HERVEA_15q21.3	0.276583	3.83612e-10	5.99597e-09
ENSG00000188389.11	PDCD1	ERV316A3_6p22.1n	0.279929	2.76053e-10	6.06633e-09
ENSG00000146648.19	EGFR	ERVLE_22q12.3b	0.299888	9.58222e-12	6.0765e-09
ENSG00000047936.11	ROS1	HML2_4p16.1b	0.277488	3.34459e-10	6.48325e-09
ENSG00000198400.12	NTRK1	ERV316A3_6p21.2b	0.275791	4.32254e-10	6.709e-09
ENSG00000198400.12	NTRK1	HERVH_1p11.2	0.27503	4.84713e-10	7.44513e-09
ENSG00000047936.11	ROS1	ERVLE_5q12.3a	0.276395	3.94666e-10	7.48684e-09
ENSG00000157764.14	BRAF	HERVH_4q13.2	0.287293	7.34098e-11	7.57828e-09
ENSG00000047936.11	ROS1	HERVL_2p11.2b	0.276187	4.07212e-10	7.65938e-09
ENSG00000157764.14	BRAF	HERVL18_2q32.1	0.286963	7.73305e-11	7.80159e-09
ENSG00000047936.11	ROS1	HERVIP10FH_14q23.1	0.275964	4.21116e-10	7.85434e-09
ENSG00000171094.18	ALK	HML2_11p15.4a	0.292365	3.27242e-11	7.99993e-09
ENSG00000171094.18	ALK	HML3_12q13.11	0.293124	2.89589e-11	7.99993e-09
ENSG00000198400.12	NTRK1	HML3_Xq13.3	0.274363	5.35635e-10	8.19892e-09
ENSG00000146648.19	EGFR	ERV316A3_5p15.32a	0.29713	1.50962e-11	8.37652e-09
ENSG00000198400.12	NTRK1	HERVH48_8q24.13	0.274096	5.57523e-10	8.4755e-09
ENSG00000120217.14	CD274	PABLB_10p15.1b	0.292004	3.46828e-11	8.55316e-09
ENSG00000047936.11	ROS1	HERVL_1q23.3a	0.275319	4.64063e-10	8.59792e-09
ENSG00000163599.17	CTLA4	ERVLE_10p11.22b	0.275821	4.30335e-10	8.6437e-09
ENSG00000163599.17	CTLA4	HERV9_10p13	0.275536	4.49154e-10	8.98106e-09
ENSG00000120217.14	CD274	ERVLE_17q21.2b	-0.291198	3.94659e-11	9.22048e-09
ENSG00000047936.11	ROS1	HERVH_10q24.2a	0.274795	5.02111e-10	9.24843e-09
ENSG00000047936.11	ROS1	HML3_13q12.11b	0.274755	5.05122e-10	9.26543e-09
ENSG00000188389.11	PDCD1	MER61_4q21.1b	0.275775	4.33322e-10	9.429e-09
ENSG00000146648.19	EGFR	LTR25_1q22	0.295658	1.9202e-11	9.47086e-09
ENSG00000188389.11	PDCD1	HERVP71A_8q24.13	0.275627	4.43091e-10	9.59454e-09
ENSG00000157764.14	BRAF	HERVW_2q11.2	0.285184	1.02234e-10	9.65564e-09
ENSG00000157764.14	BRAF	MER4B_2q31.1	-0.286305	1.04461e-10	9.66046e-09
ENSG00000198400.12	NTRK1	HERVL_3p13b	0.272885	6.6788e-10	9.94872e-09
ENSG00000157764.14	BRAF	HERVIP10FH_17q21.32	0.284582	1.12309e-10	1.00356e-08
ENSG00000047936.11	ROS1	HERVK11_1q23.3a	0.274145	5.53422e-10	1.00682e-08
ENSG00000188389.11	PDCD1	HERV3_4p16.1	0.27519	4.73162e-10	1.00991e-08
ENSG00000047936.11	ROS1	HERVH_3q11.1	0.273707	5.90886e-10	1.06624e-08
ENSG00000163599.17	CTLA4	ERV316A3_6p21.33b	0.274079	5.58905e-10	1.08815e-08
ENSG00000047936.11	ROS1	ERV316A3_1q42.12b	0.273315	6.26425e-10	1.12579e-08
ENSG00000188389.11	PDCD1	HML3_17p13.1	0.2742	5.48896e-10	1.16026e-08
ENSG00000047936.11	ROS1	HERVIP10FH_Xq24	0.273	6.56552e-10	1.17046e-08
ENSG00000047936.11	ROS1	MER4_8q24.3b	0.272944	6.62041e-10	1.17552e-08
ENSG00000198400.12	NTRK1	LTR25_6q21	0.271715	7.94632e-10	1.17579e-08
ENSG00000157764.14	BRAF	HERVL40_12p11.21	0.283177	1.39763e-10	1.1931e-08
ENSG00000163599.17	CTLA4	ERV316A3_6p22.1k	0.273386	6.19841e-10	1.19629e-08
ENSG00000188389.11	PDCD1	HERVL_1p22.1b	0.274966	5.78498e-10	1.21704e-08
ENSG00000188389.11	PDCD1	MER61_2q35	0.273752	5.86894e-10	1.22888e-08
ENSG00000198400.12	NTRK1	PABLA_7q21.13	0.271336	8.40459e-10	1.23536e-08
ENSG00000157764.14	BRAF	LTR46_Xq13.3	0.282513	1.54903e-10	1.29738e-08
ENSG00000198400.12	NTRK1	ERV316A3_6p22.1m	0.270713	9.21559e-10	1.3501e-08
ENSG00000163599.17	CTLA4	HERVL_6q22.33b	0.2724	7.17904e-10	1.37956e-08
ENSG00000047936.11	ROS1	ERV316A3_6p21.33b	0.271732	7.92598e-10	1.40173e-08
ENSG00000146648.19	EGFR	MER4_5q35.2d	0.292453	3.22634e-11	1.43217e-08
ENSG00000163599.17	CTLA4	ERVLE_5q13.2a	0.27206	7.54997e-10	1.44458e-08
ENSG00000198400.12	NTRK1	MER4_15q22.31a	0.270168	9.98587e-10	1.4486e-08
ENSG00000047936.11	ROS1	HERVH_7q11.23a	0.27143	8.28899e-10	1.45434e-08
ENSG00000198400.12	NTRK1	HARLEQUIN_3q22.2	0.27003	1.0191e-09	1.46877e-08
ENSG00000198400.12	NTRK1	HERVW_11q14.2	0.270039	1.01769e-09	1.46877e-08
ENSG00000105976.16	MET	PABLA_7q32.1	0.306099	3.38259e-12	1.50153e-08
ENSG00000120217.14	CD274	HERVH_8q24.22a	0.28745	7.16192e-11	1.51389e-08
ENSG00000198400.12	NTRK1	MER4_16q24.3	0.269709	1.06833e-09	1.52978e-08
ENSG00000047936.11	ROS1	HERVH_5q13.3b	0.270866	9.00964e-10	1.56838e-08
ENSG00000047936.11	ROS1	ERVLE_12q14.3a	0.270551	9.43777e-10	1.6365e-08
ENSG00000198400.12	NTRK1	HML3_17p13.1	0.269169	1.15635e-09	1.64521e-08
ENSG00000133703.13	KRAS	ERV316A3_6p22.1i	-0.289463	5.20596e-11	1.65066e-08
ENSG00000047936.11	ROS1	MER4_22q12.3	0.270209	9.92588e-10	1.7012e-08
ENSG00000188389.11	PDCD1	ERV316A3_Xp22.11	0.271174	8.60843e-10	1.77734e-08
ENSG00000188389.11	PDCD1	HML5_12q12a	0.272147	8.75032e-10	1.79827e-08
ENSG00000047936.11	ROS1	HERV9_6q25.1	0.269786	1.05636e-09	1.80352e-08
ENSG00000198400.12	NTRK1	MER4_Xq21.31g	-0.268285	1.31604e-09	1.8657e-08
ENSG00000198400.12	NTRK1	MER61_Xp11.21	0.26821	1.33069e-09	1.87521e-08
ENSG00000163599.17	CTLA4	HERVH_3q13.2	0.270109	1.00721e-09	1.91068e-08
ENSG00000163599.17	CTLA4	LTR25_12p11.22b	0.269775	1.05799e-09	1.99848e-08
ENSG00000171094.18	ALK	MER4_Xq21.31g	0.285899	9.14022e-11	2.02867e-08
ENSG00000047936.11	ROS1	HML1_11q13.4	0.268702	1.23824e-09	2.08995e-08
ENSG00000157764.14	BRAF	HERVH_7q21.3b	0.279271	2.54986e-10	2.09608e-08
ENSG00000157764.14	BRAF	HUERSP1_2q11.2	0.278961	2.67354e-10	2.13572e-08
ENSG00000198400.12	NTRK1	MER41_15q22.31b	0.267035	1.57896e-09	2.19719e-08
ENSG00000163599.17	CTLA4	LTR57_5q31.1	0.269038	1.17875e-09	2.21715e-08
ENSG00000163599.17	CTLA4	PABLA_1q25.1	0.268785	1.22339e-09	2.28178e-08
ENSG00000198400.12	NTRK1	ERVLE_8q24.22b	0.266217	1.77791e-09	2.45862e-08
ENSG00000047936.11	ROS1	HML6_11p15.4	0.267365	1.50506e-09	2.51164e-08
ENSG00000198400.12	NTRK1	ERVLB4_15q13.3a	0.265732	1.90721e-09	2.60496e-08
ENSG00000198400.12	NTRK1	ERVLB4_19p13.11	0.265735	1.9063e-09	2.60496e-08
ENSG00000163599.17	CTLA4	HERVH_2q24.1e	0.267772	1.41837e-09	2.63438e-08
ENSG00000047936.11	ROS1	HERVH_4q34.1b	0.266794	1.63532e-09	2.68859e-08
ENSG00000163599.17	CTLA4	ERVLE_3p24.3a	0.26759	1.45645e-09	2.69382e-08
ENSG00000163599.17	CTLA4	ERV316A3_15q21.2a	0.267492	1.47747e-09	2.72137e-08
ENSG00000047936.11	ROS1	HERVL74_10p11.22	0.266518	1.7021e-09	2.7778e-08
ENSG00000157764.14	BRAF	HERVL74_19q13.41a	-0.276705	3.76571e-10	2.88207e-08
ENSG00000188389.11	PDCD1	HERVH_4p16.1d	0.267557	1.46342e-09	2.92619e-08
ENSG00000047936.11	ROS1	HERVL_6q22.33b	0.265995	1.83612e-09	2.95309e-08
ENSG00000157168.20	NRG1	HERVH_13q33.3	0.279801	2.35137e-10	3.06992e-08
ENSG00000198400.12	NTRK1	ERV316A3_21q22.3b	0.264497	2.27879e-09	3.09343e-08
ENSG00000163599.17	CTLA4	HML3_16p13.13	0.266453	1.71826e-09	3.15181e-08
ENSG00000157168.20	NRG1	ERV316A3_6q14.2	0.279357	2.51654e-10	3.19169e-08
ENSG00000171094.18	ALK	HERVH_7q34a	0.282293	1.60275e-10	3.23391e-08
ENSG00000171094.18	ALK	ERVLB4_10q23.33c	0.282295	1.60214e-10	3.23391e-08
ENSG00000157764.14	BRAF	HERVIP10F_3p21.31	0.276854	4.37339e-10	3.29042e-08
ENSG00000047936.11	ROS1	ERVLB4_3p21.31a	0.265174	2.06703e-09	3.31248e-08
ENSG00000198400.12	NTRK1	HERVL_10q11.23	0.263954	2.46376e-09	3.33434e-08
ENSG00000198400.12	NTRK1	HERV3_11q13.3	0.263845	2.50256e-09	3.37655e-08
ENSG00000163599.17	CTLA4	ERVLB4_1q23.1a	0.265746	1.90335e-09	3.47695e-08
ENSG00000047936.11	ROS1	MER41_7q21.13	0.264807	2.17926e-09	3.47977e-08
ENSG00000047936.11	ROS1	MER41_3p22.1b	0.264608	2.24261e-09	3.56808e-08
ENSG00000047936.11	ROS1	HERV30_11q14.2	0.264524	2.2699e-09	3.5986e-08
ENSG00000188389.11	PDCD1	MER4_7p14.3a	0.267108	1.8123e-09	3.60754e-08
ENSG00000198400.12	NTRK1	HERVH_6p21.32	0.263146	2.76604e-09	3.67619e-08
ENSG00000146648.19	EGFR	ERV316A3_22q12.3a	0.285865	9.19003e-11	3.7086e-08
ENSG00000047936.11	ROS1	ERVLB4_5q12.3a	0.264192	2.38077e-09	3.76093e-08
ENSG00000198400.12	NTRK1	HERVL18_3p21.31b	0.26277	2.91855e-09	3.85579e-08
ENSG00000163599.17	CTLA4	HERVH_4q13.3	0.264922	2.1435e-09	3.89959e-08
ENSG00000047936.11	ROS1	HML6_19p13.2d	0.263712	2.5507e-09	4.00091e-08
ENSG00000157764.14	BRAF	MER61_4q21.23a	0.274152	5.52833e-10	4.02299e-08
ENSG00000157764.14	BRAF	HERVL74_14q12	0.273981	5.67162e-10	4.0607e-08
ENSG00000163599.17	CTLA4	HERVH_1p11.2	0.264532	2.26744e-09	4.09153e-08
ENSG00000047936.11	ROS1	HERVH_1p33	0.263461	2.64419e-09	4.13295e-08
ENSG00000146648.19	EGFR	LTR25_7q21.12	0.284615	1.11734e-10	4.13322e-08
ENSG00000188389.11	PDCD1	HERVL_6q22.33b	0.265077	2.09615e-09	4.13547e-08
ENSG00000198400.12	NTRK1	MER4_6q22.1b	0.26218	3.17458e-09	4.16922e-08
ENSG00000171094.18	ALK	HERVE_17q11.2	0.280002	2.28009e-10	4.21721e-08
ENSG00000171094.18	ALK	HERVH_3q21.2b	0.280201	2.21166e-10	4.21721e-08
ENSG00000188389.11	PDCD1	MER61_1q42.12	0.264525	2.26952e-09	4.4577e-08
ENSG00000171094.18	ALK	HERVH_9q21.33c	0.278983	2.6645e-10	4.54913e-08
ENSG00000157168.20	NRG1	MER41_12q12	0.276611	3.81989e-10	4.58283e-08
ENSG00000163599.17	CTLA4	HML3_4q31.3	0.263658	2.57039e-09	4.61942e-08
ENSG00000198400.12	NTRK1	ERV316A3_4q21.1m	0.261313	3.59121e-09	4.68864e-08
ENSG00000146648.19	EGFR	ERVLB4_6q27d	-0.28313	1.40786e-10	4.8073e-08
ENSG00000157764.14	BRAF	ERV316A3_3q12.1d	0.272613	6.95438e-10	4.90008e-08
ENSG00000198400.12	NTRK1	HERV3_19q13.33	0.260924	3.79479e-09	4.92547e-08
ENSG00000198400.12	NTRK1	MER41_7q21.13	0.260931	3.79083e-09	4.92547e-08
ENSG00000198400.12	NTRK1	ERVLB4_4q31.23	0.260792	3.8662e-09	4.99173e-08
ENSG00000188389.11	PDCD1	HARLEQUIN_3q22.2	0.263411	2.66295e-09	5.16193e-08
ENSG00000047936.11	ROS1	MER41_15q22.31b	0.261827	3.33835e-09	5.16339e-08
ENSG00000163599.17	CTLA4	ERV316A3_2q22.3c	0.262639	2.97366e-09	5.28003e-08
ENSG00000198400.12	NTRK1	PRIMA41_20q13.33	0.26026	4.16862e-09	5.33271e-08
ENSG00000188389.11	PDCD1	ERV316A3_6p21.33b	0.263112	2.77929e-09	5.34081e-08
ENSG00000198400.12	NTRK1	HERVH_Xq22.2c	0.260226	4.18831e-09	5.34251e-08
ENSG00000047936.11	ROS1	HERVH_14q11.2a	0.261432	3.53107e-09	5.42367e-08
ENSG00000188389.11	PDCD1	PABLA_1q25.1	0.262728	2.93626e-09	5.59402e-08
ENSG00000188389.11	PDCD1	LTR25_12p11.22b	0.26274	2.93096e-09	5.59402e-08
ENSG00000163599.17	CTLA4	HARLEQUIN_3q22.2	0.261971	3.27058e-09	5.78411e-08
ENSG00000047936.11	ROS1	MER4B_12q22	0.260888	3.81404e-09	5.8381e-08
ENSG00000198400.12	NTRK1	ERV316A3_6p22.1n	0.259419	4.69372e-09	5.91915e-08
ENSG00000120217.14	CD274	ERV316A3_21q22.3a	-0.277758	3.21056e-10	5.99393e-08
ENSG00000120217.14	CD274	MER41_22q11.21	-0.277696	3.24069e-10	5.99393e-08
ENSG00000120217.14	CD274	HERVL74_17q12	0.279285	3.04124e-10	5.99393e-08
ENSG00000047936.11	ROS1	ERVL_5q11.2	0.260434	4.06706e-09	6.1407e-08
ENSG00000047936.11	ROS1	HML6_5q13.2e	0.260475	4.04397e-09	6.1407e-08
ENSG00000047936.11	ROS1	HERVL_Xq11.1a	0.260484	4.03836e-09	6.1407e-08
ENSG00000163599.17	CTLA4	PABLB_1q31.3a	0.261329	3.58323e-09	6.28693e-08
ENSG00000163599.17	CTLA4	ERVL_16p12.2	0.261273	3.61169e-09	6.31193e-08
ENSG00000047936.11	ROS1	HERVH_7p22.1a	0.260139	4.24019e-09	6.3804e-08
ENSG00000163599.17	CTLA4	HERV3_11q14.1	0.261163	3.66855e-09	6.38615e-08
ENSG00000157764.14	BRAF	MER101_Xq23a	0.270577	9.40217e-10	6.52129e-08
ENSG00000198400.12	NTRK1	ERV316A3_6p22.1k	0.258504	5.33747e-09	6.69294e-08
ENSG00000047936.11	ROS1	HERVW_5p13.2a	0.259762	4.4717e-09	6.70604e-08
ENSG00000047936.11	ROS1	HML6_19q13.41f	0.259367	4.72787e-09	7.06633e-08
ENSG00000157764.14	BRAF	ERVLE_4q22.1a	0.269803	1.05357e-09	7.08609e-08
ENSG00000198400.12	NTRK1	HERVFRD_9q22.31	0.257902	5.8066e-09	7.2607e-08
ENSG00000047936.11	ROS1	MER101_2q35a	0.259103	4.90694e-09	7.30936e-08
ENSG00000157764.14	BRAF	MER41_6q21a	0.26938	1.12119e-09	7.31903e-08
ENSG00000198400.12	NTRK1	HERVE_2p14a	0.257798	5.89149e-09	7.34616e-08
ENSG00000157168.20	NRG1	ERV316A3_3q25.2c	0.272937	6.62807e-10	7.5441e-08
ENSG00000047936.11	ROS1	ERVLE_5q31.1b	0.258816	5.10875e-09	7.58453e-08
ENSG00000163599.17	CTLA4	ERVLB4_15q13.3a	0.259766	4.46919e-09	7.71935e-08
ENSG00000198400.12	NTRK1	ERV316A3_10q22.1a	0.257335	6.28519e-09	7.78888e-08
ENSG00000171094.18	ALK	ERVLB4_8p23.1n	0.275062	4.82352e-10	7.93023e-08
ENSG00000198400.12	NTRK1	HML4_19p12	0.257107	6.48817e-09	8.00028e-08
ENSG00000163599.17	CTLA4	HERVH_2q23.3c	-0.259371	4.72502e-09	8.09821e-08
ENSG00000157764.14	BRAF	HERVP71A_2q32.2	0.268517	1.27218e-09	8.18438e-08
ENSG00000163599.17	CTLA4	HERVW_11q14.1	0.259113	4.89991e-09	8.36566e-08
ENSG00000188389.11	PDCD1	HML5_12q23.1	0.260625	4.5259e-09	8.44137e-08
ENSG00000198400.12	NTRK1	MER4_20q13.13	0.256635	6.92958e-09	8.49735e-08
ENSG00000198400.12	NTRK1	HML5_12q12a	0.256557	7.00538e-09	8.56664e-08
ENSG00000157168.20	NRG1	HERVH_3q13.11	0.271899	7.7324e-10	8.58103e-08
ENSG00000120217.14	CD274	MER41_8q24.3	-0.27497	4.89075e-10	8.68402e-08
ENSG00000120217.14	CD274	PABLA_19q13.2	0.274658	5.1251e-10	8.75012e-08
ENSG00000163599.17	CTLA4	HERVL18_21q21.3	-0.258723	5.17577e-09	8.76918e-08
ENSG00000165731.20	RET	HERVS71_11q13.2	0.295395	2.00404e-11	8.89592e-08
ENSG00000198400.12	NTRK1	ERVLB4_19q13.12	0.256259	7.30127e-09	8.90394e-08
ENSG00000047936.11	ROS1	ERV316A3_1q25.3b	0.257635	6.02797e-09	8.91938e-08
ENSG00000047936.11	ROS1	HERVL74_8q21.2	0.257605	6.05297e-09	8.92663e-08
ENSG00000198400.12	NTRK1	ERV316A3_5q35.3d	0.255895	7.67947e-09	9.2886e-08
ENSG00000198400.12	NTRK1	ERVLB4_Xq26.3y	0.255904	7.6699e-09	9.2886e-08
ENSG00000198400.12	NTRK1	ERV316A3_6p21.2a	0.255858	7.71882e-09	9.31082e-08
ENSG00000157764.14	BRAF	HML5_16p11.2	0.267489	1.47811e-09	9.32037e-08
ENSG00000157168.20	NRG1	ERV316A3_6q22.31f	0.270977	8.86332e-10	9.36769e-08
ENSG00000163599.17	CTLA4	HERVH48_8q24.13	0.258111	5.63959e-09	9.44684e-08
ENSG00000198400.12	NTRK1	MER4_5p12b	0.255659	7.93528e-09	9.54599e-08
ENSG00000120217.14	CD274	MER4_Xq21.1a	0.273734	5.88525e-10	9.67578e-08
ENSG00000047936.11	ROS1	HERVW_1p12b	0.256937	6.64434e-09	9.7663e-08
ENSG00000047936.11	ROS1	HML3_16p13.13	0.256849	6.72577e-09	9.85337e-08
ENSG00000157764.14	BRAF	LTR57_22q11.21	0.26685	1.62208e-09	9.86358e-08
ENSG00000047936.11	ROS1	ERV316A3_8q23.1c	0.256753	6.81689e-09	9.95401e-08
ENSG00000198400.12	NTRK1	HERV9_6q25.1	0.255288	8.3537e-09	1.00222e-07
ENSG00000047936.11	ROS1	HERVFRD_3p22.1	0.256667	6.8982e-09	1.00397e-07
ENSG00000198400.12	NTRK1	ERVLE_1p31.1k	0.255225	8.42571e-09	1.00813e-07
ENSG00000165731.20	RET	HERVS71_4p16.1b	0.285934	9.09042e-11	1.00881e-07
ENSG00000165731.20	RET	ERVLE_5q12.3a	0.287331	7.29678e-11	1.00881e-07
ENSG00000133703.13	KRAS	ERV316A3_6q22.31g	0.276106	4.1222e-10	1.01658e-07
ENSG00000198400.12	NTRK1	ERV316A3_6q22.33	0.255031	8.65551e-09	1.03284e-07
ENSG00000198400.12	NTRK1	MER4_6p12.1	-0.254733	9.01861e-09	1.06756e-07
ENSG00000163599.17	CTLA4	ERV316A3_20q13.33b	0.257065	6.52683e-09	1.08107e-07
ENSG00000188389.11	PDCD1	ERVLE_10p11.22b	0.257793	5.8956e-09	1.08143e-07
ENSG00000047936.11	ROS1	HERVH_6p22.3d	0.256032	7.5351e-09	1.09308e-07
ENSG00000171094.18	ALK	HERVH_1q32.2b	0.272343	7.23996e-10	1.10821e-07
ENSG00000163599.17	CTLA4	HML5_12q12a	0.25775	6.74068e-09	1.11234e-07
ENSG00000047936.11	ROS1	ERV316A3_6p25.1e	0.255869	7.70738e-09	1.11443e-07
ENSG00000047936.11	ROS1	HERVH_7q22.3b	0.255838	7.74084e-09	1.11564e-07
ENSG00000157764.14	BRAF	ERVLB4_17q21.32	-0.2667	1.92103e-09	1.12203e-07
ENSG00000163599.17	CTLA4	HERVL_Xq22.3b	0.256739	6.82973e-09	1.12286e-07
ENSG00000188389.11	PDCD1	HERVIP10F_19p13.11	0.257387	6.24006e-09	1.1399e-07
ENSG00000198400.12	NTRK1	MER41_14q32.12	0.254165	9.75377e-09	1.14846e-07
ENSG00000133703.13	KRAS	ERVLE_7p22.3	-0.274041	5.62123e-10	1.18822e-07
ENSG00000133703.13	KRAS	LTR25_3q26.33a	0.27424	5.45591e-10	1.18822e-07
ENSG00000133703.13	KRAS	HERVH_11p15.4b	0.274605	5.1657e-10	1.18822e-07
ENSG00000188389.11	PDCD1	HERVH_4q13.3	0.256894	6.68393e-09	1.20121e-07
ENSG00000188389.11	PDCD1	ERVLB4_1q23.1a	0.256902	6.67645e-09	1.20121e-07
ENSG00000157764.14	BRAF	HERVL_3q26.1e	0.265037	2.1085e-09	1.21554e-07
ENSG00000120217.14	CD274	ERV316A3_9q31.3	0.271938	7.68777e-10	1.21879e-07
ENSG00000157764.14	BRAF	HERVW_7q21.2	0.264911	2.14687e-09	1.22179e-07
ENSG00000133703.13	KRAS	PABLB_1q31.3a	-0.273481	6.11169e-10	1.23317e-07
ENSG00000047936.11	ROS1	HERVH_9p13.3c	0.254944	8.7605e-09	1.25041e-07
ENSG00000047936.11	ROS1	HERVH_6p21.1	0.254905	8.80726e-09	1.25306e-07
ENSG00000198400.12	NTRK1	HML2_6q25.1	0.253431	1.07893e-08	1.26369e-07
ENSG00000188389.11	PDCD1	HML6_2q14.3	0.2565	7.06028e-09	1.26373e-07
ENSG00000133703.13	KRAS	HERVH_8q22.3b	0.272994	6.57135e-10	1.26827e-07
ENSG00000133703.13	KRAS	HML6_5q13.2e	-0.273579	7.0954e-10	1.31235e-07
ENSG00000188389.11	PDCD1	HERVK14C_7q36.1	0.256115	7.44908e-09	1.32797e-07
ENSG00000133703.13	KRAS	ERV316A3_1q42.12b	-0.271805	7.84167e-10	1.33881e-07
ENSG00000133703.13	KRAS	HERVH_16q24.1a	0.271916	7.71288e-10	1.33881e-07
ENSG00000198400.12	NTRK1	ERV316A3_Xp22.11	0.252964	1.15027e-08	1.34018e-07
ENSG00000188389.11	PDCD1	ERVL_16p12.2	0.256002	7.5662e-09	1.34345e-07
ENSG00000157764.14	BRAF	HERVL40_1q41	0.264117	2.40686e-09	1.35241e-07
ENSG00000188389.11	PDCD1	PRIMA4_Xp11.22	0.25588	7.69569e-09	1.361e-07
ENSG00000171094.18	ALK	MER41_14q32.2	0.270436	9.59855e-10	1.3809e-07
ENSG00000198400.12	NTRK1	ERVLB4_4q21.1a	0.252682	1.19554e-08	1.38927e-07
ENSG00000163599.17	CTLA4	ERV316A3_Xp22.11	0.255084	8.59209e-09	1.39198e-07
ENSG00000198400.12	NTRK1	ERVLE_12p11.21b	0.25257	1.2139e-08	1.40325e-07
ENSG00000171094.18	ALK	MER61_5p13.2	0.270079	1.01169e-09	1.4034e-07
ENSG00000163599.17	CTLA4	HUERSP2_14q31.3	0.254973	8.72521e-09	1.40841e-07
ENSG00000198400.12	NTRK1	HERVE_9q34.3	0.252478	1.22935e-08	1.41743e-07
ENSG00000163599.17	CTLA4	HERVL40_15q23	0.254889	8.82655e-09	1.4196e-07
ENSG00000157764.14	BRAF	ERVLB4_7q36.3a	0.263529	2.6183e-09	1.43489e-07
ENSG00000146648.19	EGFR	HERVFH21_10q22.1b	0.275009	4.86239e-10	1.43894e-07
ENSG00000047936.11	ROS1	MER61_2q35	0.253843	1.01949e-08	1.44585e-07
ENSG00000047936.11	ROS1	ERV316A3_1p22.3c	0.253752	1.03234e-08	1.45942e-07
ENSG00000157764.14	BRAF	ERV316A3_21q22.3e	0.2643	2.70202e-09	1.46271e-07
ENSG00000198400.12	NTRK1	PRIMA4_8p22	0.25216	1.28388e-08	1.47265e-07
ENSG00000105976.16	MET	HERVL_9p24.1b	0.287767	6.81224e-11	1.51198e-07
ENSG00000163599.17	CTLA4	HERVH_3p22.3b	0.254272	9.61099e-09	1.54019e-07
ENSG00000163599.17	CTLA4	HML1_19p13.2	0.254222	9.67785e-09	1.54532e-07
ENSG00000188389.11	PDCD1	ERVLE_15q25.3b	0.255827	8.77436e-09	1.54561e-07
ENSG00000157764.14	BRAF	ERVLB4_3q22.1a	0.262838	2.89036e-09	1.54582e-07
ENSG00000171094.18	ALK	HERVIP10FH_17q21.32	0.26898	1.18889e-09	1.5522e-07
ENSG00000171094.18	ALK	ERVLE_10q26.3d	0.269104	1.1675e-09	1.5522e-07
ENSG00000157764.14	BRAF	HERVK11_4q21.21a	0.26248	3.04186e-09	1.58857e-07
ENSG00000157168.20	NRG1	HERVH_22q12.1	0.267054	1.57461e-09	1.58857e-07
ENSG00000198400.12	NTRK1	ERVLE_Xq22.1a	0.251494	1.40581e-08	1.59601e-07
ENSG00000188389.11	PDCD1	HERVH_4q34.3c	-0.25462	9.16047e-09	1.60092e-07
ENSG00000163599.17	CTLA4	ERVLE_1q32.1e	0.253838	1.02023e-08	1.61743e-07
ENSG00000188389.11	PDCD1	HML6_19q13.41a	0.254429	9.40555e-09	1.6373e-07
ENSG00000198400.12	NTRK1	MER4_19p12a	0.251196	1.46405e-08	1.65366e-07
ENSG00000198400.12	NTRK1	MER41_4p16.1b	0.251114	1.4805e-08	1.66378e-07
ENSG00000198400.12	NTRK1	ERV316A3_4q31.1b	0.25078	1.54906e-08	1.72771e-07
ENSG00000198400.12	NTRK1	MER61_4q21.1b	0.250796	1.54574e-08	1.72771e-07
ENSG00000157764.14	BRAF	ERV316A3_12p11.22a	0.261559	3.46811e-09	1.74942e-07
ENSG00000198400.12	NTRK1	HERV3_4p16.1	0.25059	1.58961e-08	1.76407e-07
ENSG00000157764.14	BRAF	HUERSP1_Xp22.2	0.261297	3.59906e-09	1.76484e-07
ENSG00000157764.14	BRAF	ERV316A3_4p16.1f	0.261324	3.58561e-09	1.76484e-07
ENSG00000047936.11	ROS1	HERVK11D_5p13.2	0.252152	1.28536e-08	1.78303e-07
ENSG00000047936.11	ROS1	MER41_16p12.3	0.252152	1.28522e-08	1.78303e-07
ENSG00000047936.11	ROS1	HML2_7q11.21	0.251927	1.32537e-08	1.8328e-07
ENSG00000047936.11	ROS1	HML6_19q13.41a	0.251897	1.33084e-08	1.83466e-07
ENSG00000146648.19	EGFR	HERVH_1q42.13b	0.272799	6.76523e-10	1.87693e-07
ENSG00000163599.17	CTLA4	MER61_2q35	0.252348	1.2514e-08	1.97686e-07
ENSG00000198400.12	NTRK1	HERVL32_2q31.3	0.249637	1.80831e-08	1.99679e-07
ENSG00000157764.14	BRAF	HERVH_11p15.4g	0.260046	4.29613e-09	2.00742e-07
ENSG00000198400.12	NTRK1	HML1_19p13.2	0.249544	1.83114e-08	2.01199e-07
ENSG00000157168.20	NRG1	HERVH_3q25.2c	0.265199	2.05983e-09	2.03191e-07
ENSG00000157764.14	BRAF	HERVL_5p15.32a	0.259848	4.41822e-09	2.03908e-07
ENSG00000157764.14	BRAF	MER41_22q12.3e	0.260737	4.45574e-09	2.03908e-07
ENSG00000188389.11	PDCD1	HERVW_11q14.1	0.252711	1.19083e-08	2.04887e-07
ENSG00000198400.12	NTRK1	PRIMA4_Xp11.21	0.249337	1.88306e-08	2.05378e-07
ENSG00000157764.14	BRAF	HERVL_12q13.13	0.259471	4.65909e-09	2.08906e-07
ENSG00000198400.12	NTRK1	MER4B_17p11.2a	0.248987	1.97399e-08	2.14187e-07
ENSG00000120217.14	CD274	HERVEA_5q22.2	0.266944	1.60008e-09	2.15234e-07
ENSG00000198400.12	NTRK1	ERV316A3_3q13.12c	0.248731	2.0433e-08	2.18559e-07
ENSG00000198400.12	NTRK1	LTR19_19p13.2b	0.248753	2.03722e-08	2.18559e-07
ENSG00000188389.11	PDCD1	HERVL18_2q31.1	0.252099	1.29455e-08	2.20173e-07
ENSG00000171094.18	ALK	MER41_3q13.31b	-0.266153	1.79461e-09	2.21285e-07
ENSG00000163599.17	CTLA4	HERV3_7q33	0.252326	1.41077e-08	2.21287e-07
ENSG00000163599.17	CTLA4	HERVL40_11q13.4b	0.251346	1.43456e-08	2.24226e-07
ENSG00000157764.14	BRAF	MER41_4p15.2	0.258741	5.16267e-09	2.29171e-07
ENSG00000198400.12	NTRK1	HERVE_10p13c	0.248304	2.16402e-08	2.30361e-07
ENSG00000157168.20	NRG1	MER41_17q22e	-0.263881	2.48963e-09	2.35138e-07
ENSG00000157168.20	NRG1	ERVLE_22q13.2f	0.26362	2.58463e-09	2.36449e-07
ENSG00000198400.12	NTRK1	HML3_19p12b	0.248035	2.24332e-08	2.37663e-07
ENSG00000133703.13	KRAS	HERVH_8q22.2	0.267315	1.51594e-09	2.40331e-07
ENSG00000198400.12	NTRK1	ERV316A3_6p22.1p	0.247834	2.30471e-08	2.43007e-07
ENSG00000047936.11	ROS1	ERVLE_Xq22.3i	0.24975	1.78102e-08	2.44011e-07
ENSG00000198400.12	NTRK1	HERV3_6p12.2	-0.247765	2.32622e-08	2.44694e-07
ENSG00000188389.11	PDCD1	HERVL40_11q13.4b	0.251117	1.47996e-08	2.50745e-07
ENSG00000157764.14	BRAF	MER4B_12p13.31c	-0.258942	5.71743e-09	2.51284e-07
ENSG00000157168.20	NRG1	MER41_6p21.32	-0.262973	2.835e-09	2.51692e-07
ENSG00000146648.19	EGFR	ERVLB4_22q11.21a	0.269901	1.03862e-09	2.56135e-07
ENSG00000163599.17	CTLA4	HERVH_8q22.1a	0.250187	1.67875e-08	2.61472e-07
ENSG00000198400.12	NTRK1	HERVH_11q23.3a	0.247192	2.51141e-08	2.6231e-07
ENSG00000198400.12	NTRK1	HERVK11D_2q31.1	0.247	2.57648e-08	2.67845e-07
ENSG00000198400.12	NTRK1	HUERSP3_19q11	0.247015	2.57133e-08	2.67845e-07
ENSG00000171094.18	ALK	HML1_3q21.3	0.264354	2.32603e-09	2.71717e-07
ENSG00000198400.12	NTRK1	ERVLE_1p35.2b	0.246803	2.64524e-08	2.74351e-07
ENSG00000157764.14	BRAF	HML2_14q11.2	0.257301	6.31491e-09	2.74823e-07
ENSG00000163599.17	CTLA4	HERVL_Xq11.1a	0.249721	1.78796e-08	2.77508e-07
ENSG00000198400.12	NTRK1	ERVLE_10p11.22b	0.246564	2.73101e-08	2.82586e-07
ENSG00000188389.11	PDCD1	ERVLE_5q13.2a	0.250075	1.70443e-08	2.85508e-07
ENSG00000047936.11	ROS1	MER4_8q24.3c	0.248484	2.11214e-08	2.86721e-07
ENSG00000047936.11	ROS1	ERVL_16p12.3	0.248422	2.12985e-08	2.88243e-07
ENSG00000171094.18	ALK	HARLEQUIN_Xq23a	0.263279	2.71385e-09	2.93824e-07
ENSG00000188389.11	PDCD1	ERV316A3_6p21.2b	0.249796	1.76997e-08	2.94266e-07
ENSG00000198400.12	NTRK1	HERV3_11q14.1	0.246239	2.85186e-08	2.94405e-07
ENSG00000163599.17	CTLA4	HERVH_12p13.31d	0.249203	1.91746e-08	2.95542e-07
ENSG00000163599.17	CTLA4	ERVLE_12p11.21b	0.249119	1.93928e-08	2.97871e-07
ENSG00000198400.12	NTRK1	ERVLE_4q24g	0.246085	2.91084e-08	2.99797e-07
ENSG00000163599.17	CTLA4	MER4_6p22.3d	0.249005	1.96913e-08	3.01413e-07
ENSG00000047936.11	ROS1	ERV316A3_10q22.1a	0.247903	2.28341e-08	3.06225e-07
ENSG00000047936.11	ROS1	MER4_Xq21.33d	0.247836	2.30398e-08	3.08053e-07
ENSG00000146648.19	EGFR	HML2_9q34.11	0.268238	1.3252e-09	3.09608e-07
ENSG00000047936.11	ROS1	ERVLE_1p35.2b	0.247647	2.36316e-08	3.12205e-07
ENSG00000198400.12	NTRK1	MER34B_7q36.1	0.245733	3.05014e-08	3.13416e-07
ENSG00000163599.17	CTLA4	HERVIP10FH_5q31.3	0.248532	2.09871e-08	3.19047e-07
ENSG00000188389.11	PDCD1	HERVL_10p13c	0.249082	1.94892e-08	3.21607e-07
ENSG00000198400.12	NTRK1	ERVLE_1p13.2a	0.245517	3.13884e-08	3.21786e-07
ENSG00000157168.20	NRG1	LTR25_3q26.33a	0.260962	3.77424e-09	3.22189e-07
ENSG00000163599.17	CTLA4	PRIMA4_Xp11.22	0.248378	2.14257e-08	3.24602e-07
ENSG00000198400.12	NTRK1	MER101_6p25.2c	0.245359	3.20501e-08	3.27058e-07
ENSG00000047936.11	ROS1	HERVH_13q14.2a	0.247213	2.50427e-08	3.28889e-07
ENSG00000171094.18	ALK	ERVLB4_22q13.2	0.262076	3.22212e-09	3.32628e-07
ENSG00000198400.12	NTRK1	HERVIP10FH_10p11.23	0.245199	3.27382e-08	3.33314e-07
ENSG00000120217.14	CD274	HUERSP2_3q21.3	-0.263208	2.74141e-09	3.38031e-07
ENSG00000120217.14	CD274	ERVLB4_17q21.32	0.264472	2.63689e-09	3.38031e-07
ENSG00000188389.11	PDCD1	HERVE_3p26.3	0.248681	2.05703e-08	3.38191e-07
ENSG00000157764.14	BRAF	ERVLB4_17q25.1	-0.255627	7.97068e-09	3.4021e-07
ENSG00000047936.11	ROS1	HERVH_14q24.3b	0.246934	2.59927e-08	3.40359e-07
ENSG00000157764.14	BRAF	PRIMA41_19q13.2b	0.255499	8.11273e-09	3.41602e-07
ENSG00000157764.14	BRAF	ERVLB4_8p21.1a	0.255391	8.2354e-09	3.41654e-07
ENSG00000171094.18	ALK	HERVH_11q13.4b	0.261718	3.39058e-09	3.42063e-07
ENSG00000171094.18	ALK	HERVS71_11p15.4	0.261423	3.5357e-09	3.48777e-07
ENSG00000198400.12	NTRK1	HERVW_Xq22.3c	0.244834	3.43589e-08	3.49014e-07
ENSG00000163599.17	CTLA4	MER4_12q12a	0.247647	2.36311e-08	3.54387e-07
ENSG00000163599.17	CTLA4	HML1_6q22.32	0.247669	2.3563e-08	3.54387e-07
ENSG00000047936.11	ROS1	PRIMA41_19p12d	0.246599	2.71819e-08	3.54884e-07
ENSG00000198400.12	NTRK1	HERV9_6p21.2	0.244597	3.54528e-08	3.59303e-07
ENSG00000157764.14	BRAF	HUERSP3_1q42.12	-0.255655	8.98334e-09	3.68818e-07
ENSG00000157764.14	BRAF	HML5_1q42.12	0.254597	9.1899e-09	3.70854e-07
ENSG00000047936.11	ROS1	MER34B_19p13.11	0.246172	2.87713e-08	3.73438e-07
ENSG00000157168.20	NRG1	HERVK11_6q25.3	0.259631	4.55527e-09	3.7446e-07
ENSG00000157764.14	BRAF	HERVW_4q23	0.254376	9.47347e-09	3.77696e-07
ENSG00000047936.11	ROS1	HERVH_21q22.2	0.245953	2.96202e-08	3.83335e-07
ENSG00000198400.12	NTRK1	HML6_3p25.1	0.243981	3.84546e-08	3.85327e-07
ENSG00000157764.14	BRAF	HERVFRD_2p11.2	0.254024	9.94411e-09	3.90636e-07
ENSG00000188389.11	PDCD1	HML1_19p13.2	0.247522	2.40297e-08	3.93608e-07
ENSG00000171094.18	ALK	HERVH_Xp11.21	0.260394	4.09022e-09	3.94706e-07
ENSG00000047936.11	ROS1	HARLEQUIN_17q12	0.245638	3.08863e-08	3.95113e-07
ENSG00000047936.11	ROS1	PABLA_16p13.3b	0.245549	3.12554e-08	3.98686e-07
ENSG00000198400.12	NTRK1	ERVLB4_3q13.13	0.243532	4.07967e-08	4.05138e-07
ENSG00000198400.12	NTRK1	HERV4_15q21.3	0.243441	4.12881e-08	4.09102e-07
ENSG00000163599.17	CTLA4	ERVLE_15q25.3b	0.247255	2.77254e-08	4.12996e-07
ENSG00000188389.11	PDCD1	HERVL40_15q23	0.247098	2.54324e-08	4.15054e-07
ENSG00000198400.12	NTRK1	ERVLB4_5q12.3a	0.243294	4.2093e-08	4.15224e-07
ENSG00000198400.12	NTRK1	HERVL40_22q11.23	0.243267	4.22419e-08	4.15769e-07
ENSG00000157764.14	BRAF	HERV3_19q13.42b	0.254249	1.08773e-08	4.19866e-07
ENSG00000157764.14	BRAF	HERVH_9q33.3b	0.253216	1.11119e-08	4.25223e-07
ENSG00000198400.12	NTRK1	PRIMA4_Xp11.22	0.24301	4.36914e-08	4.29084e-07
ENSG00000047936.11	ROS1	HERVH_Xq21.33a	0.244898	3.40707e-08	4.30882e-07
ENSG00000047936.11	ROS1	PRIMA4_8p22	0.244756	3.47152e-08	4.37786e-07
ENSG00000133703.13	KRAS	HERVH_1q42.2e	0.262911	2.86049e-09	4.37852e-07
ENSG00000188389.11	PDCD1	HERVH_1p11.2	0.246607	2.71516e-08	4.41486e-07
ENSG00000133703.13	KRAS	HERVH_2q23.3c	0.262578	2.99956e-09	4.43835e-07
ENSG00000047936.11	ROS1	ERV316A3_3q27.1a	0.244583	3.55179e-08	4.44124e-07
ENSG00000171094.18	ALK	HML2_15q25.2	0.259347	4.74133e-09	4.47803e-07
ENSG00000047936.11	ROS1	ERVLB4_1q23.1a	0.244476	3.60243e-08	4.49191e-07
ENSG00000198400.12	NTRK1	HERVIP10F_14q11.2c	0.242487	4.67893e-08	4.58494e-07
ENSG00000047936.11	ROS1	HML1_Yq11.21b	0.24411	3.7807e-08	4.70099e-07
ENSG00000198400.12	NTRK1	ERVL_11p14.3	0.242185	4.86741e-08	4.75913e-07
ENSG00000198400.12	NTRK1	ERVLE_17p11.2c	0.242156	4.88574e-08	4.76655e-07
ENSG00000171094.18	ALK	MER101_3q27.2	0.258738	5.1652e-09	4.77673e-07
ENSG00000047936.11	ROS1	HERVK11_22q11.21	0.243936	3.86847e-08	4.79669e-07
ENSG00000165731.20	RET	HERVL_1p31.1d	0.272984	6.58103e-10	4.86887e-07
ENSG00000047936.11	ROS1	HERVL18_2q31.1	0.243698	3.99141e-08	4.908e-07
ENSG00000047936.11	ROS1	HERVL_1p31.1d	0.243701	3.98995e-08	4.908e-07
ENSG00000146648.19	EGFR	HERVP71A_1q41	0.264696	2.21465e-09	4.91541e-07
ENSG00000171094.18	ALK	ERV316A3_8q22.1d	0.258338	5.46328e-09	4.94929e-07
ENSG00000198400.12	NTRK1	HERVH_12p13.31d	0.241765	5.14208e-08	4.97291e-07
ENSG00000165731.20	RET	ERVLE_8p23.1b	0.271299	8.45108e-10	4.98798e-07
ENSG00000163599.17	CTLA4	HML6_2q14.3	0.244899	3.40641e-08	5.00697e-07
ENSG00000165731.20	RET	ERVLE_17p11.2c	0.271057	1.02546e-09	5.0578e-07
ENSG00000157764.14	BRAF	ERVLE_22q13.31d	0.251824	1.34412e-08	5.09963e-07
ENSG00000171094.18	ALK	HERVH_11p11.12	0.25789	5.81692e-09	5.16426e-07
ENSG00000146648.19	EGFR	HERVP71A_12p13.33b	-0.263975	2.45611e-09	5.19174e-07
ENSG00000198400.12	NTRK1	HERVH_2q31.1c	0.241402	5.39114e-08	5.20245e-07
ENSG00000047936.11	ROS1	ERVLE_12q13.12	0.243202	4.26025e-08	5.20972e-07
ENSG00000198400.12	NTRK1	ERVLE_5q22.2b	0.24132	5.44923e-08	5.2471e-07
ENSG00000120217.14	CD274	ERVLB4_2q32.3	0.259461	4.66551e-09	5.31031e-07
ENSG00000047936.11	ROS1	HERV4_4q12	0.242973	4.39032e-08	5.35402e-07
ENSG00000047936.11	ROS1	HERVW_Xq22.3c	0.242853	4.46001e-08	5.42411e-07
ENSG00000047936.11	ROS1	MER4_5p12c	0.242646	4.58275e-08	5.54301e-07
ENSG00000047936.11	ROS1	HML2_3p12.3	0.242574	4.62621e-08	5.58036e-07
ENSG00000188389.11	PDCD1	HERVH_2q31.1c	0.244646	3.52243e-08	5.68585e-07
ENSG00000133703.13	KRAS	MER4_10p15.1	0.26052	4.01828e-09	5.75392e-07
ENSG00000188389.11	PDCD1	HERVH_11q23.3a	0.244489	3.59615e-08	5.77221e-07
ENSG00000198400.12	NTRK1	ERVLE_8p23.1e	0.240558	6.01659e-08	5.78087e-07
ENSG00000157764.14	BRAF	HERVIP10F_22q13.2	-0.251335	1.61169e-08	5.91262e-07
ENSG00000157764.14	BRAF	ERVLB4_8p21.1b	0.250532	1.60218e-08	5.91262e-07
ENSG00000157764.14	BRAF	HERVH_7q21.2	0.250597	1.58802e-08	5.91262e-07
ENSG00000047936.11	ROS1	HERVH_13q13.3a	0.242086	4.93107e-08	5.91595e-07
ENSG00000146648.19	EGFR	LTR25_12p11.22b	-0.262414	3.07046e-09	5.92599e-07
ENSG00000146648.19	EGFR	ERV316A3_1q24.2b	0.262514	3.0272e-09	5.92599e-07
ENSG00000163599.17	CTLA4	HERV3_4p16.1	0.24335	4.17829e-08	6.08113e-07
ENSG00000188389.11	PDCD1	HERVH_2q24.1e	0.244051	3.81027e-08	6.08409e-07
ENSG00000198400.12	NTRK1	HUERSP3_2p13.3	0.239885	6.56429e-08	6.25298e-07
ENSG00000157168.20	NRG1	HERVH_16q24.1a	0.255299	8.34028e-09	6.275e-07
ENSG00000157168.20	NRG1	MER4_Xq22.3c	0.255309	8.32866e-09	6.275e-07
ENSG00000157168.20	NRG1	HERVL_12q12b	0.255323	8.31252e-09	6.275e-07
ENSG00000157168.20	NRG1	HERVH_1q42.2a	0.255332	8.30246e-09	6.275e-07
ENSG00000198400.12	NTRK1	LTR25_21q22.11	0.239536	6.86796e-08	6.51429e-07
ENSG00000133703.13	KRAS	HERVL_1q23.3a	-0.259884	5.01796e-09	6.5514e-07
ENSG00000047936.11	ROS1	HERVW_3p11.1	0.241233	5.51071e-08	6.55819e-07
ENSG00000198400.12	NTRK1	ERV316A3_1p22.3c	0.239249	7.1269e-08	6.7026e-07
ENSG00000171094.18	ALK	HERVIP10F_3p21.31	0.255655	7.93918e-09	6.77731e-07
ENSG00000188389.11	PDCD1	HERVFRD_9q22.31	0.243168	4.27936e-08	6.78432e-07
ENSG00000120217.14	CD274	HERVW_17q12a	0.257497	6.14492e-09	6.81933e-07
ENSG00000157168.20	NRG1	ERV316A3_21q22.3b	-0.254435	9.39776e-09	6.95278e-07
ENSG00000198400.12	NTRK1	MER41_Xq11.1c	0.238933	7.4232e-08	6.96651e-07
ENSG00000198400.12	NTRK1	HERVH_7q21.2	0.238898	7.45669e-08	6.96848e-07
ENSG00000198400.12	NTRK1	HML3_16p13.13	0.238909	7.44608e-08	6.96848e-07
ENSG00000163599.17	CTLA4	HERVH_19q13.41a	0.242177	4.87239e-08	7.02226e-07
ENSG00000163599.17	CTLA4	HERVL_3p13b	0.242145	4.89273e-08	7.02875e-07
ENSG00000198400.12	NTRK1	PABLB_14q11.2a	0.23876	7.59071e-08	7.07881e-07
ENSG00000163599.17	CTLA4	ERVLB4_8q24.3d	-0.242798	4.96124e-08	7.10418e-07
ENSG00000157764.14	BRAF	ERVLE_7p22.3	-0.24906	1.95484e-08	7.11273e-07
ENSG00000198400.12	NTRK1	HERV9_7p14.2	0.238512	7.83664e-08	7.29284e-07
ENSG00000133703.13	KRAS	ERV316A3_9q34.2b	-0.257794	5.89544e-09	7.4771e-07
ENSG00000171094.18	ALK	HERVL_9q22.32	0.254606	9.1779e-09	7.54457e-07
ENSG00000157764.14	BRAF	MER61_4q31.21b	0.248557	2.0915e-08	7.5481e-07
ENSG00000165731.20	RET	HERVFC2_11p15.4	0.266498	1.70688e-09	7.57685e-07
ENSG00000133703.13	KRAS	HML1_10p15.1	0.257479	6.16062e-09	7.59639e-07
ENSG00000120217.14	CD274	HERVL_7p15.2a	0.256345	7.21431e-09	7.62484e-07
ENSG00000047936.11	ROS1	ERVLE_Xq22.1a	0.240003	6.46496e-08	7.63243e-07
ENSG00000188389.11	PDCD1	HERVH_3q13.2	0.242188	4.86575e-08	7.65925e-07
ENSG00000047936.11	ROS1	MER4B_19q13.42a	0.239942	6.51684e-08	7.67328e-07
ENSG00000047936.11	ROS1	PRIMA4_Xp11.21	0.239912	6.54191e-08	7.68241e-07
ENSG00000047936.11	ROS1	HERVL_5q33.3	0.23988	6.56919e-08	7.6941e-07
ENSG00000157764.14	BRAF	ERVLB4_22q11.21a	0.248351	2.15034e-08	7.69786e-07
ENSG00000171094.18	ALK	HERVH_16q21c	0.254247	9.6439e-09	7.7835e-07
ENSG00000198400.12	NTRK1	HERVFRD_3p22.1	0.237887	8.49141e-08	7.85279e-07
ENSG00000198400.12	NTRK1	HERVIP10FH_14q23.1	0.237711	8.68558e-08	7.99903e-07
ENSG00000047936.11	ROS1	MER61_Xp11.21	0.239495	6.90393e-08	8.02265e-07
ENSG00000157764.14	BRAF	ERVLE_6p22.2a	0.247925	2.27669e-08	8.08499e-07
ENSG00000165731.20	RET	MER101_2p25.2	0.265213	2.05566e-09	8.10706e-07
ENSG00000133703.13	KRAS	HERVH_13q31.3a	0.256611	6.95302e-09	8.12223e-07
ENSG00000157764.14	BRAF	HERVH_11q14.1g	0.247778	2.32216e-08	8.18102e-07
ENSG00000198400.12	NTRK1	HERVL40_1q44	0.237442	8.99063e-08	8.24574e-07
ENSG00000157764.14	BRAF	HERVL_4q13.2b	0.247606	2.37623e-08	8.30557e-07
ENSG00000133703.13	KRAS	ERV316A3_9q31.3	0.256236	7.32495e-09	8.3373e-07
ENSG00000120217.14	CD274	HERVH_6q22.1c	-0.255455	8.16188e-09	8.42174e-07
ENSG00000120217.14	CD274	HERVH_11q22.2	-0.255136	8.53108e-09	8.42174e-07
ENSG00000120217.14	CD274	HML5_1q22	0.256027	8.53747e-09	8.42174e-07
ENSG00000141736.14	ERBB2	HML3_13q12.11b	0.268221	1.3284e-09	8.42393e-07
ENSG00000141736.14	ERBB2	MER41_4p16.1b	0.269759	1.23774e-09	8.42393e-07
ENSG00000047936.11	ROS1	HML2_6q25.1	0.238954	7.40355e-08	8.51408e-07
ENSG00000188389.11	PDCD1	HERVL_Xq22.3b	0.241282	5.4759e-08	8.55899e-07
ENSG00000047936.11	ROS1	MER61_3p11.2	0.238761	7.58991e-08	8.70584e-07
ENSG00000188389.11	PDCD1	HERVH_7q11.23a	0.24108	5.62218e-08	8.75679e-07
ENSG00000047936.11	ROS1	MER4_16q24.3	0.238668	7.68095e-08	8.78756e-07
ENSG00000157168.20	NRG1	HERV3_11q13.3	-0.253476	1.20792e-08	8.79011e-07
ENSG00000157764.14	BRAF	ERVLE_22q13.31c	0.247078	2.54984e-08	8.84276e-07
ENSG00000157764.14	BRAF	MER61_6q22.33	0.247003	2.57569e-08	8.86318e-07
ENSG00000163599.17	CTLA4	MER61_3p11.2	0.240263	6.25143e-08	8.89426e-07
ENSG00000047936.11	ROS1	ERVLE_1p13.2a	0.238517	7.83223e-08	8.9376e-07
ENSG00000157168.20	NRG1	HERVH_8q24.22a	0.252285	1.26216e-08	9.03663e-07
ENSG00000120217.14	CD274	MER41_9p21.1a	-0.254339	9.52223e-09	9.08092e-07
ENSG00000163599.17	CTLA4	HERVH_2q31.1c	0.240057	6.42027e-08	9.1053e-07
ENSG00000047936.11	ROS1	HERVL40_2q37.3	0.238123	8.2389e-08	9.35357e-07
ENSG00000047936.11	ROS1	HERVL18_11q12.2	0.238085	8.27843e-08	9.37448e-07
ENSG00000047936.11	ROS1	ERV316A3_5q14.3e	0.237951	8.42288e-08	9.5065e-07
ENSG00000188389.11	PDCD1	HERVE_2q37.1	0.240985	6.26693e-08	9.62591e-07
ENSG00000198400.12	NTRK1	HERVH_5q23.2b	0.236174	1.05689e-07	9.63353e-07
ENSG00000198400.12	NTRK1	ERVLE_2p13.2a	0.236151	1.06009e-07	9.64293e-07
ENSG00000047936.11	ROS1	HML5_Xq11.1	0.237768	8.62212e-08	9.68951e-07
ENSG00000198400.12	NTRK1	ERVLB4_15q21.2	0.236035	1.07587e-07	9.74652e-07
ENSG00000198400.12	NTRK1	HERVFRD_7q21.3	0.23601	1.07921e-07	9.75688e-07
ENSG00000163599.17	CTLA4	HERVH_4q22.3a	0.239358	7.02779e-08	9.87226e-07
ENSG00000163599.17	CTLA4	HML3_17p13.1	0.239374	7.01269e-08	9.87226e-07
ENSG00000188389.11	PDCD1	ERV316A3_7q33a	-0.239947	6.51256e-08	9.93446e-07
ENSG00000188389.11	PDCD1	HERVH_11p11.12	-0.239885	6.56457e-08	9.97949e-07
ENSG00000047936.11	ROS1	HERVEA_4q28.3	0.237509	8.91289e-08	9.99099e-07
ENSG00000198400.12	NTRK1	MER41_3p22.1b	0.235759	1.11422e-07	1.00529e-06
ENSG00000163599.17	CTLA4	HERVIP10F_19p13.11	0.239164	7.20533e-08	1.00897e-06
ENSG00000047936.11	ROS1	HERVL74_19q13.41a	0.237314	9.138e-08	1.01919e-06
ENSG00000163599.17	CTLA4	HERVL_10q11.23	0.239038	7.3233e-08	1.02227e-06
ENSG00000146648.19	EGFR	MER101_2q33.1	0.257931	5.78326e-09	1.02688e-06
ENSG00000133703.13	KRAS	ERVLB4_3q26.33b	0.254281	9.59918e-09	1.03929e-06
ENSG00000198400.12	NTRK1	HERVEA_3q25.32	0.235378	1.16944e-07	1.0466e-06
ENSG00000163599.17	CTLA4	MER4_15q22.31b	0.238768	7.58333e-08	1.05525e-06
ENSG00000198400.12	NTRK1	LTR25_19q13.43	0.235205	1.19543e-07	1.06556e-06
ENSG00000141736.14	ERBB2	HUERSP3B_11p12	0.265609	1.94142e-09	1.07725e-06
ENSG00000188389.11	PDCD1	HERV9_10p13	0.239217	7.15687e-08	1.08428e-06
ENSG00000163599.17	CTLA4	ERVL_5q11.2	0.23845	7.89971e-08	1.09584e-06
ENSG00000188389.11	PDCD1	HERVH_4q24b	-0.239051	7.3111e-08	1.10147e-06
ENSG00000188389.11	PDCD1	MER34B_4q31.3	0.239042	7.31995e-08	1.10147e-06
ENSG00000198400.12	NTRK1	HERVH_6q22.31g	-0.234836	1.2526e-07	1.11429e-06
ENSG00000163599.17	CTLA4	HERVH_11q23.3a	0.2382	8.15769e-08	1.1246e-06
ENSG00000198400.12	NTRK1	HUERSP3B_1p33a	0.234644	1.2833e-07	1.13931e-06
ENSG00000198400.12	NTRK1	ERVLB4_11p15.4c	0.234519	1.30373e-07	1.15284e-06
ENSG00000198400.12	NTRK1	HERVIP10FH_5q31.3	0.234452	1.31493e-07	1.16043e-06
ENSG00000198400.12	NTRK1	ERVLB4_2q37.1a	0.234434	1.31779e-07	1.16065e-06
ENSG00000198400.12	NTRK1	HERVL_4p16.3a	0.234396	1.32422e-07	1.164e-06
ENSG00000047936.11	ROS1	ERVLE_Xp11.4b	0.236073	1.07064e-07	1.18223e-06
ENSG00000120217.14	CD274	HERVIP10FH_8q24.13a	-0.252189	1.27874e-08	1.18256e-06
ENSG00000157764.14	BRAF	HERVH_2p14b	0.244451	3.61446e-08	1.18849e-06
ENSG00000163599.17	CTLA4	ERVLE_4p12e	0.237706	8.69147e-08	1.19079e-06
ENSG00000198400.12	NTRK1	HERVP71A_1q44b	0.234195	1.35817e-07	1.19149e-06
ENSG00000157168.20	NRG1	MER4B_12q22	0.249968	1.72923e-08	1.19938e-06
ENSG00000157168.20	NRG1	HERVH_1q41a	0.249849	1.75733e-08	1.20012e-06
ENSG00000157168.20	NRG1	HERVH_1p31.3c	0.249618	1.81291e-08	1.21932e-06
ENSG00000163599.17	CTLA4	PRIMA4_8p22	0.237402	9.03582e-08	1.23037e-06
ENSG00000120217.14	CD274	ERVL_22q12.3b	0.251735	1.36056e-08	1.23255e-06
ENSG00000198400.12	NTRK1	MER4_12q12a	0.233881	1.4131e-07	1.23723e-06
ENSG00000163599.17	CTLA4	MER61_5q22.1	0.237184	9.29219e-08	1.26141e-06
ENSG00000047936.11	ROS1	MER101_1p22.2a	0.235486	1.15346e-07	1.26425e-06
ENSG00000165731.20	RET	HERVH_22q11.1	0.260546	4.00342e-09	1.26937e-06
ENSG00000165731.20	RET	HERVW_6q27a	0.261	3.75424e-09	1.26937e-06
ENSG00000163599.17	CTLA4	ERVLB4_1q25.1c	0.237084	9.4109e-08	1.27363e-06
ENSG00000198400.12	NTRK1	HERVL18_4p15.2b	0.233507	1.48119e-07	1.28922e-06
ENSG00000141736.14	ERBB2	HERVL40_2q37.3	0.263537	2.61536e-09	1.28996e-06
ENSG00000047936.11	ROS1	HERVL74_17q12	0.23528	1.18399e-07	1.29452e-06
ENSG00000146648.19	EGFR	ERV316A3_21q22.3a	0.255985	7.58419e-09	1.29485e-06
ENSG00000120217.14	CD274	MER101_13q21.31	-0.250962	1.51138e-08	1.29743e-06
ENSG00000120217.14	CD274	HERVFH21_Xq11.2a	0.251126	1.47815e-08	1.29743e-06
ENSG00000047936.11	ROS1	HERVL_7p15.2a	0.235159	1.20229e-07	1.3113e-06
ENSG00000198400.12	NTRK1	HERVW_Xp11.21	0.233307	1.51882e-07	1.31168e-06
ENSG00000188389.11	PDCD1	HERVH_12q15a	0.237562	8.85353e-08	1.32773e-06
ENSG00000157764.14	BRAF	HERVH_4q31.21b	0.243195	4.26394e-08	1.38158e-06
ENSG00000133703.13	KRAS	MER4_6p12.1	0.251935	1.32392e-08	1.39926e-06
ENSG00000171094.18	ALK	ERV316A3_3q27.3c	0.249186	1.9217e-08	1.42174e-06
ENSG00000120217.14	CD274	MER4_7q21.2	0.250092	1.70057e-08	1.42431e-06
ENSG00000198400.12	NTRK1	ERV316A3_1q42.12b	0.232527	1.67489e-07	1.43807e-06
ENSG00000163599.17	CTLA4	ERVLE_5q31.1b	0.236082	1.06944e-07	1.44293e-06
ENSG00000163599.17	CTLA4	ERV316A3_6p21.2a	0.235917	1.09211e-07	1.46905e-06
ENSG00000133703.13	KRAS	HERVL40_1q41	0.251397	1.42452e-08	1.47057e-06
ENSG00000188389.11	PDCD1	HERVL_18q21.2a	0.236531	1.00996e-07	1.50443e-06
ENSG00000047936.11	ROS1	HERV3_21q22.13	0.233962	1.39875e-07	1.51072e-06
ENSG00000047936.11	ROS1	ERVL_22q12.3b	0.233963	1.39861e-07	1.51072e-06
ENSG00000157168.20	NRG1	HERVH_7q11.23b	0.247911	2.28095e-08	1.51121e-06
ENSG00000198400.12	NTRK1	HERVL_18q21.2a	0.232081	1.77112e-07	1.51776e-06
ENSG00000198400.12	NTRK1	HERVP71A_8q24.13	0.232059	1.77605e-07	1.51905e-06
ENSG00000157168.20	NRG1	HERVFRD_8q13.2	0.24776	2.32776e-08	1.51955e-06
ENSG00000047936.11	ROS1	MER61_3q13.11	0.233868	1.41544e-07	1.52413e-06
ENSG00000163599.17	CTLA4	HML2_1q22	0.235426	1.16228e-07	1.55871e-06
ENSG00000157764.14	BRAF	MER4_2q21.1a	0.242036	4.96312e-08	1.57366e-06
ENSG00000146648.19	EGFR	HERVL_4q13.2b	0.254294	9.58191e-09	1.57534e-06
ENSG00000165731.20	RET	HARLEQUIN_3q22.2	0.257613	6.04597e-09	1.57871e-06
ENSG00000165731.20	RET	ERVLE_21q22.3b	0.257733	5.94562e-09	1.57871e-06
ENSG00000047936.11	ROS1	HERVL66_19p12j	0.23355	1.47313e-07	1.57953e-06
ENSG00000198400.12	NTRK1	MER61_13q14.2	0.231658	1.86705e-07	1.58467e-06
ENSG00000188389.11	PDCD1	HERVL18_21q21.3	-0.236053	1.07331e-07	1.59345e-06
ENSG00000047936.11	ROS1	HERVL40_18q11.2c	0.23341	1.49937e-07	1.59993e-06
ENSG00000171094.18	ALK	HERV3_7q34c	0.248184	2.19913e-08	1.60032e-06
ENSG00000133703.13	KRAS	ERVLB4_17q25.1	-0.250243	1.66602e-08	1.60771e-06
ENSG00000133703.13	KRAS	ERVLE_5q31.1h	0.250366	1.63851e-08	1.60771e-06
ENSG00000198400.12	NTRK1	LTR25_19p12a	0.231467	1.91222e-07	1.61683e-06
ENSG00000047936.11	ROS1	MER101_6p25.2c	0.233304	1.51942e-07	1.61743e-06
ENSG00000188389.11	PDCD1	HERV3_6p12.2	-0.23588	1.09717e-07	1.61805e-06
ENSG00000198400.12	NTRK1	HERVH_22q11.1	0.231402	1.92777e-07	1.62688e-06
ENSG00000157764.14	BRAF	HERV3_19q13.42a	0.241657	5.21506e-08	1.63026e-06
ENSG00000198400.12	NTRK1	ERV316A3_18q22.3e	0.231317	1.94819e-07	1.64099e-06
ENSG00000157764.14	BRAF	HERVH_3q21.2b	0.241542	5.29393e-08	1.64334e-06
ENSG00000198400.12	NTRK1	HML6_7p13	0.231217	1.9725e-07	1.65206e-06
ENSG00000198400.12	NTRK1	ERVL_16p12.2	0.231222	1.97133e-07	1.65206e-06
ENSG00000198400.12	NTRK1	ERVLE_1p22.3a	0.231232	1.96897e-07	1.65206e-06
ENSG00000163599.17	CTLA4	MER41_4p16.1b	0.235598	1.24117e-07	1.65452e-06
ENSG00000157764.14	BRAF	ERV316A3_5p15.31	0.241429	5.37221e-08	1.65606e-06
ENSG00000133703.13	KRAS	HERVH_5q31.1d	0.249834	1.76093e-08	1.66314e-06
ENSG00000047936.11	ROS1	MER61_13q14.2	0.232969	1.58468e-07	1.67088e-06
ENSG00000188389.11	PDCD1	HERVL18_9p24.1	0.235574	1.14077e-07	1.67679e-06
ENSG00000120217.14	CD274	HERVH_1q24.2	0.248686	2.05551e-08	1.68971e-06
ENSG00000146648.19	EGFR	ERVLE_11q14.2c	0.253476	1.07229e-08	1.69996e-06
ENSG00000198400.12	NTRK1	HERVEA_6q22.31	0.230902	2.05145e-07	1.71173e-06
ENSG00000198400.12	NTRK1	HERVH48_1p22.3	0.230908	2.04981e-07	1.71173e-06
ENSG00000198400.12	NTRK1	MER101_1p22.2a	0.23074	2.09301e-07	1.74312e-06
ENSG00000198400.12	NTRK1	ERVLB4_7q21.3b	0.230694	2.10524e-07	1.75003e-06
ENSG00000120217.14	CD274	HERVL40_3q12.2	-0.248223	2.18767e-08	1.76565e-06
ENSG00000198400.12	NTRK1	HML5_12q23.1	0.230534	2.14731e-07	1.77834e-06
ENSG00000171094.18	ALK	HERVK11_12q23.3b	0.247263	2.48774e-08	1.78114e-06
ENSG00000157168.20	NRG1	HERVH_20p11.23b	0.246131	2.89284e-08	1.80864e-06
ENSG00000198400.12	NTRK1	ERVLE_15q25.1a	0.230331	2.20223e-07	1.81166e-06
ENSG00000198400.12	NTRK1	HML6_8q12.1	0.230298	2.21115e-07	1.81428e-06
ENSG00000047936.11	ROS1	HERVIP10F_19q13.41a	0.232119	1.76259e-07	1.84968e-06
ENSG00000157764.14	BRAF	ERVLE_7q21.2	0.240457	6.0957e-08	1.85334e-06
ENSG00000047936.11	ROS1	MER4_13q12.12c	0.232029	1.7827e-07	1.86197e-06
ENSG00000171094.18	ALK	ERVL_3q26.32	0.246799	2.64668e-08	1.86486e-06
ENSG00000157764.14	BRAF	ERVLB4_3q26.33b	0.240167	6.32898e-08	1.91118e-06
ENSG00000047936.11	ROS1	PABLA_16p13.3a	0.231765	1.84247e-07	1.91989e-06
ENSG00000157764.14	BRAF	ERVLE_2p14b	-0.239995	6.47164e-08	1.94105e-06
ENSG00000047936.11	ROS1	HUERSP3_1q44	0.231627	1.87438e-07	1.94401e-06
ENSG00000120217.14	CD274	HERVH_6q23.1	0.247348	2.4595e-08	1.94959e-06
ENSG00000133703.13	KRAS	PABLA_6q27b	-0.248494	2.1093e-08	1.95067e-06
ENSG00000171094.18	ALK	HERVH_7q34b	0.246311	2.82437e-08	1.95897e-06
ENSG00000157168.20	NRG1	ERVLB4_8q13.2	0.245183	3.2807e-08	1.96798e-06
ENSG00000157168.20	NRG1	HERVL_21q21.3f	0.245243	3.255e-08	1.96798e-06
ENSG00000157168.20	NRG1	HML2_22q11.23	-0.24501	3.35661e-08	1.98666e-06
ENSG00000157764.14	BRAF	HERV4_4q12	-0.240498	6.67049e-08	1.98727e-06
ENSG00000188389.11	PDCD1	HERV3_11q14.1	0.234124	1.37043e-07	2.0077e-06
ENSG00000198400.12	NTRK1	ERVLB4_2q37.3b	0.229436	2.46008e-07	2.01111e-06
ENSG00000188389.11	PDCD1	ERVLB4_15q13.3a	0.234021	1.38832e-07	2.02722e-06
ENSG00000188389.11	PDCD1	HERVH_19q13.41a	0.233841	1.42013e-07	2.06012e-06
ENSG00000133703.13	KRAS	HERV3_21q22.13	-0.247691	2.34937e-08	2.12834e-06
ENSG00000120217.14	CD274	ERVL_Xq21.1a	0.246529	2.74373e-08	2.13674e-06
ENSG00000163599.17	CTLA4	MER61_5q23.2b	0.232791	1.62045e-07	2.14082e-06
ENSG00000188389.11	PDCD1	HERVH_6p21.2b	0.23349	1.48441e-07	2.14634e-06
ENSG00000163599.17	CTLA4	ERV316A3_4q21.1m	0.232614	1.65678e-07	2.18233e-06
ENSG00000171094.18	ALK	HERVH_8q22.3b	0.245355	3.20699e-08	2.19013e-06
ENSG00000047936.11	ROS1	HERVH_4p16.1d	0.230582	2.13457e-07	2.20357e-06
ENSG00000157764.14	BRAF	MER4_14q22.3b	0.238886	7.46896e-08	2.21031e-06
ENSG00000163599.17	CTLA4	HERVH_10p14a	0.232445	1.6922e-07	2.21583e-06
ENSG00000157764.14	BRAF	ERVLE_6q22.31g	0.23867	7.6788e-08	2.25736e-06
ENSG00000171094.18	ALK	HERVH_3q27.3a	0.244983	3.3687e-08	2.26571e-06
ENSG00000198400.12	NTRK1	HERVH_7p14.3b	0.228367	2.80601e-07	2.26883e-06
ENSG00000047936.11	ROS1	HERVL_20p13	0.230258	2.22213e-07	2.28864e-06
ENSG00000120217.14	CD274	HML2_1q23.3	0.245875	2.99295e-08	2.29064e-06
ENSG00000133703.13	KRAS	HERVH_6p25.1	0.246958	2.59125e-08	2.30051e-06
ENSG00000163599.17	CTLA4	HERVH_6p21.32	0.232013	1.78627e-07	2.32529e-06
ENSG00000047936.11	ROS1	ERV316A3_5p15.31	0.230086	2.27009e-07	2.32724e-06
ENSG00000188389.11	PDCD1	HERVH_12p13.31d	0.23279	1.62077e-07	2.33592e-06
ENSG00000171094.18	ALK	HML1_6q14.1	0.244398	3.63954e-08	2.34144e-06
ENSG00000171094.18	ALK	PABLA_19q13.32	0.244427	3.62562e-08	2.34144e-06
ENSG00000188389.11	PDCD1	ERVLB4_8q24.3d	-0.233365	1.63997e-07	2.35593e-06
ENSG00000163599.17	CTLA4	ERVLB4_9q22.2b	0.231877	1.81669e-07	2.35798e-06
ENSG00000198400.12	NTRK1	HERVL_4q34.1c	0.227911	2.9678e-07	2.3845e-06
ENSG00000165731.20	RET	HERVL18_4q21.1	0.254167	9.75101e-09	2.40471e-06
ENSG00000146648.19	EGFR	HERVH_4q35.1a	0.250407	1.6295e-08	2.41112e-06
ENSG00000146648.19	EGFR	ERV316A3_5p13.3e	0.250474	1.61471e-08	2.41112e-06
ENSG00000198400.12	NTRK1	MER41_5q31.3a	0.227751	3.02644e-07	2.42498e-06
ENSG00000198400.12	NTRK1	ERVLB4_8p12b	0.227579	3.09101e-07	2.45896e-06
ENSG00000047936.11	ROS1	ERVLB4_7q36.1a	0.22954	2.42859e-07	2.47828e-06
ENSG00000120217.14	CD274	ERVLB4_5p15.33a	-0.245139	3.30007e-08	2.48288e-06
ENSG00000047936.11	ROS1	HML1_10p15.1	-0.229498	2.44122e-07	2.48545e-06
ENSG00000047936.11	ROS1	HERVE_11q13.4c	0.229447	2.45667e-07	2.49546e-06
ENSG00000047936.11	ROS1	LTR25_6q21	0.229406	2.46923e-07	2.50249e-06
ENSG00000198400.12	NTRK1	ERVLB4_1q23.1a	0.227308	3.19507e-07	2.52365e-06
ENSG00000047936.11	ROS1	ERV316A3_15q21.2a	0.2293	2.50158e-07	2.52375e-06
ENSG00000120217.14	CD274	HML1_11q13.4	-0.244695	3.49948e-08	2.54659e-06
ENSG00000165731.20	RET	HML6_12q24.12a	0.253436	1.21445e-08	2.56713e-06
ENSG00000165731.20	RET	HML1_Xq26.3	0.252216	1.27405e-08	2.57069e-06
ENSG00000188389.11	PDCD1	HML2_4p16.1b	0.231837	1.82582e-07	2.60605e-06
ENSG00000047936.11	ROS1	LTR57_14q32.33a	0.228976	2.60356e-07	2.61475e-06
ENSG00000120217.14	CD274	ERVLE_6p22.2a	-0.244298	3.68816e-08	2.6406e-06
ENSG00000157764.14	BRAF	HERVL_9p24.1b	-0.237272	9.18799e-08	2.64841e-06
ENSG00000188389.11	PDCD1	HERVH_9q34.13	0.231662	1.86622e-07	2.65517e-06
ENSG00000198400.12	NTRK1	PABLA_1q25.1	0.226747	3.42145e-07	2.67863e-06
ENSG00000188389.11	PDCD1	HUERSP2_14q31.3	0.231524	1.8985e-07	2.68389e-06
ENSG00000188389.11	PDCD1	HML1_6q22.32	0.231528	1.89771e-07	2.68389e-06
ENSG00000157764.14	BRAF	HERVL74_2q11.2	0.237093	9.40092e-08	2.6923e-06
ENSG00000133703.13	KRAS	ERVLE_10q26.3d	0.245428	3.176e-08	2.71121e-06
ENSG00000165731.20	RET	HML3_10q11.21a	0.252262	1.42287e-08	2.74614e-06
ENSG00000165731.20	RET	HERVE_4p16.1c	0.251065	1.49044e-08	2.75669e-06
ENSG00000163599.17	CTLA4	HERVH_4q34.3c	-0.23046	2.16723e-07	2.78045e-06
ENSG00000198400.12	NTRK1	HERV3_19q13.42b	0.226374	3.58069e-07	2.79344e-06
ENSG00000157168.20	NRG1	HERVL74_17q12	-0.242828	4.94191e-08	2.81246e-06
ENSG00000133703.13	KRAS	HERVL74_2q11.2	0.244977	3.37156e-08	2.82384e-06
ENSG00000198400.12	NTRK1	MER101_8p21.3	0.22626	3.63099e-07	2.82771e-06
ENSG00000198400.12	NTRK1	HERVH_6q23.2b	0.226191	3.6613e-07	2.84135e-06
ENSG00000133703.13	KRAS	ERVLB4_17q21.32	-0.245372	3.54993e-08	2.91818e-06
ENSG00000146648.19	EGFR	HARLEQUIN_7q22.1	0.248735	2.04215e-08	2.92423e-06
ENSG00000146648.19	EGFR	PRIMA41_5p12	0.248183	2.1994e-08	2.95853e-06
ENSG00000165731.20	RET	HUERSP2_3q21.3	0.250189	1.67825e-08	2.97989e-06
ENSG00000188389.11	PDCD1	HML6_19p13.2d	0.230539	2.14597e-07	3.01455e-06
ENSG00000163599.17	CTLA4	HML5_Xq11.1	0.229778	2.35806e-07	3.01655e-06
ENSG00000047936.11	ROS1	ERVLE_1p22.3a	0.227699	3.0457e-07	3.03136e-06
ENSG00000047936.11	ROS1	LTR25_2p13.3	0.227612	3.07838e-07	3.05703e-06
ENSG00000188389.11	PDCD1	MER61_3q13.11	0.230389	2.18637e-07	3.06161e-06
ENSG00000198400.12	NTRK1	MER34B_7q36.3a	0.225504	3.97986e-07	3.06386e-06
ENSG00000188389.11	PDCD1	HERVH_6q22.31g	-0.230297	2.21154e-07	3.0853e-06
ENSG00000171094.18	ALK	LTR25_3q26.33b	0.24218	4.87063e-08	3.08868e-06
ENSG00000047936.11	ROS1	PRIMA4_14q22.1	0.227405	3.15726e-07	3.11446e-06
ENSG00000157168.20	NRG1	HERVH_10q24.1	0.241144	5.57504e-08	3.13261e-06
ENSG00000188389.11	PDCD1	ERVLB4_3p21.31a	0.23073	2.27044e-07	3.13971e-06
ENSG00000198400.12	NTRK1	ERV316A3_4q31.23c	0.225181	4.13886e-07	3.17313e-06
ENSG00000198400.12	NTRK1	MER61_8q24.22	0.225146	4.15647e-07	3.18114e-06
ENSG00000198400.12	NTRK1	HML3_5p15.33d	0.225075	4.19216e-07	3.20293e-06
ENSG00000047936.11	ROS1	HERVH_7q22.1b	0.227057	3.29462e-07	3.24275e-06
ENSG00000133703.13	KRAS	HERVIP10F_3p21.31	0.244408	4.02596e-08	3.24931e-06
ENSG00000157764.14	BRAF	HERVP71A_1q41	0.235296	1.18165e-07	3.27834e-06
ENSG00000157764.14	BRAF	HERVH_18q12.2a	0.235344	1.17455e-07	3.27834e-06
ENSG00000157168.20	NRG1	HERVIP10FH_22q12.2	0.240671	5.92866e-08	3.28966e-06
ENSG00000047936.11	ROS1	ERV316A3_5q14.3a	0.226872	3.36992e-07	3.29495e-06
ENSG00000157764.14	BRAF	HERVI_9q34.13	0.235148	1.20408e-07	3.29932e-06
ENSG00000157764.14	BRAF	MER61_5q32	0.235182	1.19884e-07	3.29932e-06
ENSG00000198400.12	NTRK1	MER101_18q21.1a	0.224789	4.34001e-07	3.31019e-06
ENSG00000133703.13	KRAS	HERVH_8q24.23a	0.243209	4.25664e-08	3.31495e-06
ENSG00000047936.11	ROS1	ERVLE_5q22.3e	0.226803	3.39855e-07	3.31564e-06
ENSG00000133703.13	KRAS	ERV316A3_6q22.31f	0.243064	4.338e-08	3.32007e-06
ENSG00000198400.12	NTRK1	MER4_7p22.1	0.224713	4.37998e-07	3.32923e-06
ENSG00000120217.14	CD274	MER4_7p11.2f	-0.242169	4.87789e-08	3.33122e-06
ENSG00000188389.11	PDCD1	HERVL_10p13b	0.229568	2.42016e-07	3.33636e-06
ENSG00000171094.18	ALK	PRIMA41_7q32.2	0.241464	5.34743e-08	3.34327e-06
ENSG00000157764.14	BRAF	ERVL_2q24.1a	0.234965	1.23225e-07	3.3558e-06
ENSG00000163599.17	CTLA4	ERVLB4_3p21.31a	0.229472	2.6483e-07	3.3588e-06
ENSG00000157764.14	BRAF	HERVL_7q31.32	0.234746	1.2669e-07	3.36752e-06
ENSG00000157764.14	BRAF	HERVL40_1q44	0.234765	1.26378e-07	3.36752e-06
ENSG00000157764.14	BRAF	HERVH_11p15.4b	0.234799	1.25847e-07	3.36752e-06
ENSG00000157764.14	BRAF	HERVK11_6q25.3	0.234657	1.28124e-07	3.38538e-06
ENSG00000146648.19	EGFR	MER4_5q35.2b	0.246761	2.66029e-08	3.47324e-06
ENSG00000165731.20	RET	HERVFC1_11p15.4	0.248678	2.05794e-08	3.51354e-06
ENSG00000157764.14	BRAF	HML3_12q13.11	0.234112	1.37242e-07	3.58364e-06
ENSG00000157764.14	BRAF	ERV316A3_15q14a	0.233971	1.39717e-07	3.60583e-06
ENSG00000198400.12	NTRK1	HERVK14C_8q24.3b	0.223826	4.87438e-07	3.68609e-06
ENSG00000146648.19	EGFR	MER101_4p16.1	0.246054	2.92273e-08	3.70685e-06
ENSG00000198400.12	NTRK1	HERV3_19p12a	0.223717	4.93844e-07	3.72819e-06
ENSG00000047936.11	ROS1	ERVLE_8q11.21a	0.225802	3.8388e-07	3.72876e-06
ENSG00000188389.11	PDCD1	HERVL32_2q31.3	0.22843	2.78437e-07	3.81475e-06
ENSG00000188389.11	PDCD1	HERVH_8q22.2	-0.228404	2.79339e-07	3.81533e-06
ENSG00000047936.11	ROS1	HERVH_1q42.2a	-0.225259	4.09992e-07	3.96053e-06
ENSG00000047936.11	ROS1	HERV3_11q13.3	0.225251	4.10418e-07	3.96053e-06
ENSG00000105976.16	MET	HERVH_4q34.3c	0.263343	2.68917e-09	3.97908e-06
ENSG00000198400.12	NTRK1	HERVH_4q13.3	0.223101	5.31779e-07	3.98072e-06
ENSG00000188389.11	PDCD1	HERVH_10p14a	0.22791	2.96803e-07	4.04144e-06
ENSG00000171094.18	ALK	HERVE_2q24.1a	0.23963	6.78455e-08	4.06982e-06
ENSG00000047936.11	ROS1	HARLEQUIN_7p14.3	0.224994	4.23388e-07	4.07683e-06
ENSG00000171094.18	ALK	HERV9_4p14	0.239379	7.00866e-08	4.09361e-06
ENSG00000171094.18	ALK	ERV316A3_3q27.1a	0.239471	6.92562e-08	4.09361e-06
ENSG00000163599.17	CTLA4	HERVL18_9p24.1	0.227103	3.27629e-07	4.13167e-06
ENSG00000157764.14	BRAF	HERVK11_22q11.21	0.23277	1.62471e-07	4.14487e-06
ENSG00000171094.18	ALK	ERV316A3_10q26.12	0.239172	7.19777e-08	4.14947e-06
ENSG00000165731.20	RET	HML5_1q32.1	0.246774	2.6555e-08	4.20992e-06
ENSG00000146648.19	EGFR	MER4_5q35.2c	0.244666	3.51319e-08	4.21711e-06
ENSG00000171094.18	ALK	MER61_10p15.1	0.238879	7.47569e-08	4.25444e-06
ENSG00000141736.14	ERBB2	HERVW_Xp11.21	0.252949	1.15261e-08	4.26371e-06
ENSG00000120217.14	CD274	ERVLB4_17q25.1	0.240056	6.42062e-08	4.31835e-06
ENSG00000198400.12	NTRK1	HML6_20p13	0.222303	5.85102e-07	4.35783e-06
ENSG00000188389.11	PDCD1	LTR57_22q12.2	0.227215	3.2317e-07	4.38701e-06
ENSG00000198400.12	NTRK1	ERV316A3_6p25.1e	0.222181	5.93661e-07	4.40679e-06
ENSG00000120217.14	CD274	MER4_Xq21.31g	0.239657	6.76105e-08	4.41357e-06
ENSG00000188389.11	PDCD1	ERVLE_2q24.2c	0.227017	3.31093e-07	4.48086e-06
ENSG00000198400.12	NTRK1	HERVFH19_13q34	0.221999	6.06706e-07	4.48861e-06
ENSG00000198400.12	NTRK1	LTR57_14q32.33a	0.22201	6.05933e-07	4.48861e-06
ENSG00000047936.11	ROS1	ERVLB4_Xq26.3y	0.224133	4.69739e-07	4.49391e-06
ENSG00000171094.18	ALK	HERVEA_19q13.33	0.23835	8.00203e-08	4.49633e-06
ENSG00000198400.12	NTRK1	HERVH_1p33	0.221844	6.18059e-07	4.55979e-06
ENSG00000165731.20	RET	ERV316A3_3q25.2c	-0.245802	3.02231e-08	4.62622e-06
ENSG00000165731.20	RET	HML1_6q27a	0.245392	3.19123e-08	4.62838e-06
ENSG00000165731.20	RET	HARLEQUIN_17q12	0.246088	3.23226e-08	4.62838e-06
ENSG00000163599.17	CTLA4	HERVS71_4p16.1b	0.226122	3.6924e-07	4.6301e-06
ENSG00000188389.11	PDCD1	HERV3_21q22.13	0.226666	3.45561e-07	4.64832e-06
ENSG00000120217.14	CD274	HML4_10p15.1	0.239092	7.27241e-08	4.67858e-06
ENSG00000198400.12	NTRK1	ERVLE_15q25.1f	0.221573	6.38304e-07	4.68336e-06
ENSG00000157168.20	NRG1	ERVL_11p14.3	-0.237564	8.85037e-08	4.79237e-06
ENSG00000157168.20	NRG1	ERV316A3_9q31.3	0.237562	8.85277e-08	4.79237e-06
ENSG00000171094.18	ALK	PRIMA4_Xp11.22	0.237675	8.72625e-08	4.83853e-06
ENSG00000163599.17	CTLA4	HERVL40_9p24.1a	0.225612	3.92803e-07	4.8979e-06
ENSG00000120217.14	CD274	HERVW_21q21.1	-0.238596	7.75303e-08	4.91653e-06
ENSG00000188389.11	PDCD1	ERVLB4_14q32.11a	-0.226155	3.67728e-07	4.93156e-06
ENSG00000146648.19	EGFR	HERVL40_2q32.2	0.243022	4.36231e-08	4.95135e-06
ENSG00000047936.11	ROS1	HERVW_3q25.1a	0.22308	5.33145e-07	5.02469e-06
ENSG00000047936.11	ROS1	PABLA_19q13.2	0.223029	5.36398e-07	5.04464e-06
ENSG00000047936.11	ROS1	MER4B_Xq11.1a	0.222968	5.40306e-07	5.0493e-06
ENSG00000047936.11	ROS1	HERVH_12q13.2b	0.222982	5.39461e-07	5.0493e-06
ENSG00000047936.11	ROS1	HUERSP1_15q22.31	0.223001	5.38198e-07	5.0493e-06
ENSG00000047936.11	ROS1	ERVLE_1p34.2a	0.222867	5.46917e-07	5.10034e-06
ENSG00000163599.17	CTLA4	MER61_3q13.11	0.225135	4.16219e-07	5.16089e-06
ENSG00000163599.17	CTLA4	HML3_Xq13.3	0.225054	4.20282e-07	5.19674e-06
ENSG00000047936.11	ROS1	ERVLB4_18q22.2	0.222675	5.59602e-07	5.19681e-06
ENSG00000157764.14	BRAF	MER4_9q21.12	0.230615	2.12575e-07	5.21337e-06
ENSG00000198400.12	NTRK1	ERVLE_Xq22.3i	0.220554	7.20422e-07	5.25601e-06
ENSG00000157764.14	BRAF	MER61_1q42.2b	0.230467	2.1654e-07	5.28143e-06
ENSG00000163599.17	CTLA4	ERV316A3_6p21.2b	0.224834	4.31642e-07	5.32238e-06
ENSG00000198400.12	NTRK1	MER4_4p16.3a	0.220365	7.36759e-07	5.35266e-06
ENSG00000157764.14	BRAF	PRIMA41_19q13.2a	0.230201	2.23797e-07	5.39911e-06
ENSG00000198400.12	NTRK1	MER4_13q12.12c	0.220232	7.48456e-07	5.4199e-06
ENSG00000120217.14	CD274	ERVLB4_11p15.5c	0.237701	8.6971e-08	5.43752e-06
ENSG00000157764.14	BRAF	ERVLE_7p21.3b	0.230016	2.28966e-07	5.4644e-06
ENSG00000146648.19	EGFR	ERV316A3_4q22.1a	0.241862	5.07697e-08	5.49675e-06
ENSG00000157168.20	NRG1	LTR25_19q13.43	-0.236363	1.03181e-07	5.50309e-06
ENSG00000157168.20	NRG1	ERVLE_8q24.22b	-0.236291	1.04138e-07	5.50309e-06
ENSG00000157168.20	NRG1	HERVIP10FH_Xq12	0.236198	1.05376e-07	5.50309e-06
ENSG00000120217.14	CD274	ERV316A3_4q32.1h	-0.237492	8.93287e-08	5.50736e-06
ENSG00000171094.18	ALK	HERVH_4q13.2	0.236259	1.04558e-07	5.5254e-06
ENSG00000198400.12	NTRK1	MER41_9q21.12	0.220022	7.6732e-07	5.53843e-06
ENSG00000163599.17	CTLA4	LTR25_2p13.3	0.224423	4.53623e-07	5.56252e-06
ENSG00000157764.14	BRAF	ERVLB4_12p13.32	0.2298	2.35185e-07	5.58281e-06
ENSG00000163599.17	CTLA4	ERVLB4_18q22.2	0.224357	4.57254e-07	5.5916e-06
ENSG00000198400.12	NTRK1	HERVE_7p22.1c	0.219886	7.79758e-07	5.61907e-06
ENSG00000157764.14	BRAF	MER41_12q13.11	0.229644	2.39762e-07	5.6612e-06
ENSG00000047936.11	ROS1	MER4_10q23.31a	0.221853	6.17354e-07	5.70924e-06
ENSG00000163599.17	CTLA4	HML3_7q11.21	-0.22413	4.69923e-07	5.73074e-06
ENSG00000133703.13	KRAS	ERV316A3_19q13.2	-0.238413	7.93683e-08	5.77567e-06
ENSG00000133703.13	KRAS	HERVL18_3q25.31	0.238495	7.85395e-08	5.77567e-06
ENSG00000188389.11	PDCD1	LTR57_2q37.1	0.224728	4.37206e-07	5.81261e-06
ENSG00000165731.20	RET	ERVLE_15q25.3b	0.244008	4.24116e-08	5.88329e-06
ENSG00000047936.11	ROS1	ERVLE_1p36.12	0.221546	6.40402e-07	5.89781e-06
ENSG00000047936.11	ROS1	HERVH48_8q21.2	0.221509	6.43208e-07	5.91139e-06
ENSG00000198400.12	NTRK1	HUERSP3B_Xq21.33	0.219429	8.22943e-07	5.92066e-06
ENSG00000171094.18	ALK	LTR19_12q23.3	0.23553	1.14707e-07	5.92075e-06
ENSG00000157168.20	NRG1	LTR25_3q26.33b	0.235353	1.17317e-07	5.93166e-06
ENSG00000047936.11	ROS1	MER4_15q22.31b	0.22141	6.50787e-07	5.96869e-06
ENSG00000188389.11	PDCD1	HERVL_3p13b	0.224458	4.51701e-07	5.98538e-06
ENSG00000047936.11	ROS1	HML5_7p14.1	0.221343	6.5606e-07	6.00464e-06
ENSG00000146648.19	EGFR	MER41_14q32.12	0.240958	5.71195e-08	6.03698e-06
ENSG00000198400.12	NTRK1	PABLB_8q21.11	0.219229	8.42567e-07	6.05203e-06
ENSG00000133703.13	KRAS	ERVL_17q12	0.237764	8.62662e-08	6.07834e-06
ENSG00000157168.20	NRG1	HERVH_8q24.23a	0.235051	1.21893e-07	6.07957e-06
ENSG00000163599.17	CTLA4	HERVH_4p16.1d	0.223553	5.03716e-07	6.12601e-06
ENSG00000133703.13	KRAS	HERVL_4q32.1a	-0.23826	8.87219e-08	6.15369e-06
ENSG00000047936.11	ROS1	PABLB_4p15.2	0.220971	6.85726e-07	6.22482e-06
ENSG00000157168.20	NRG1	ERV316A3_6p25.3a	-0.234732	1.26918e-07	6.25987e-06
ENSG00000157764.14	BRAF	PABLB_8q24.3a	0.228681	2.69994e-07	6.27489e-06
ENSG00000157764.14	BRAF	HERVH_7q34d	0.228692	2.69631e-07	6.27489e-06
ENSG00000157168.20	NRG1	HARLEQUIN_19p13.2	0.234417	1.32075e-07	6.30409e-06
ENSG00000157168.20	NRG1	PABLA_19q13.32	0.234442	1.31659e-07	6.30409e-06
ENSG00000157168.20	NRG1	HERVH_1q42.2e	0.234442	1.31645e-07	6.30409e-06
ENSG00000171094.18	ALK	ERVLB4_3q22.1a	0.234829	1.25361e-07	6.32361e-06
ENSG00000157764.14	BRAF	ERVLE_2p14a	0.228548	2.74453e-07	6.3453e-06
ENSG00000157764.14	BRAF	HERVE_2q24.1a	0.228483	2.76633e-07	6.36256e-06
ENSG00000188389.11	PDCD1	HERVH_2q23.3c	-0.223801	4.88875e-07	6.42047e-06
ENSG00000165731.20	RET	MER61_5q22.1	0.242298	4.79581e-08	6.43405e-06
ENSG00000165731.20	RET	HERVL74_17q12	0.24285	4.92808e-08	6.43405e-06
ENSG00000171094.18	ALK	MER61_10q26.12	0.234602	1.29019e-07	6.435e-06
ENSG00000157764.14	BRAF	HERVL40_Xp11.21b	0.228978	2.81268e-07	6.43583e-06
ENSG00000157764.14	BRAF	HERVL40_3q13.13b	0.228277	2.83737e-07	6.45901e-06
ENSG00000047936.11	ROS1	HUERSP3_2p13.3	0.220566	7.19401e-07	6.47753e-06
ENSG00000163599.17	CTLA4	HML6_19q13.41a	0.223038	5.35802e-07	6.48072e-06
ENSG00000047936.11	ROS1	HERVH_8q22.3a	0.220436	7.30612e-07	6.56515e-06
ENSG00000157764.14	BRAF	LTR25_7q21.12	0.228013	2.93065e-07	6.63731e-06
ENSG00000163599.17	CTLA4	MER41_Xq11.1c	0.222717	5.56843e-07	6.68061e-06
ENSG00000157168.20	NRG1	HERVL18_6q14.1	0.233843	1.41982e-07	6.70486e-06
ENSG00000047936.11	ROS1	HUERSP3B_1q24.2	0.220238	7.47963e-07	6.70749e-06
ENSG00000198400.12	NTRK1	HERVH_2p11.2d	0.218308	9.38879e-07	6.73293e-06
ENSG00000141736.14	ERBB2	HERVFRD_7q21.3	0.248421	2.13021e-08	6.75429e-06
ENSG00000047936.11	ROS1	MER41_Xq11.1c	0.220112	7.59193e-07	6.76719e-06
ENSG00000047936.11	ROS1	HERVEA_Xp11.22	0.220143	7.5639e-07	6.76719e-06
ENSG00000157764.14	BRAF	ERVLB4_Xq22.1h	0.227688	3.04999e-07	6.83784e-06
ENSG00000133703.13	KRAS	ERVLE_11q14.2a	-0.236562	1.00598e-07	6.87006e-06
ENSG00000198400.12	NTRK1	ERVLE_4q21.1b	0.218026	9.70399e-07	6.93655e-06
ENSG00000146648.19	EGFR	ERVLE_7q11.21	0.239671	6.74925e-08	6.96743e-06
ENSG00000120217.14	CD274	MER4_Xq21.31f	0.235251	1.18839e-07	7.03369e-06
ENSG00000133703.13	KRAS	MER4_3p25.1a	0.236232	1.0492e-07	7.05669e-06
ENSG00000047936.11	ROS1	PABLA_1q25.1	0.219645	8.02203e-07	7.10774e-06
ENSG00000165731.20	RET	HML2_11p15.4a	0.241043	5.64904e-08	7.1646e-06
ENSG00000133703.13	KRAS	ERVLE_3q26.33	0.235867	1.099e-07	7.19346e-06
ENSG00000047936.11	ROS1	HERV9_10p13	0.219401	8.25596e-07	7.27147e-06
ENSG00000047936.11	ROS1	ERVLE_12p11.21b	0.219364	8.29227e-07	7.27458e-06
ENSG00000047936.11	ROS1	HERVL40_9q34.3	0.219367	8.28942e-07	7.27458e-06
ENSG00000047936.11	ROS1	ERVL_Xp11.21a	0.219296	8.35924e-07	7.31887e-06
ENSG00000157764.14	BRAF	HERVE_11q13.4e	0.227011	3.31337e-07	7.35402e-06
ENSG00000188389.11	PDCD1	HERVH_17q25.3	0.222497	5.71705e-07	7.42046e-06
ENSG00000047936.11	ROS1	HERVH_2q33.2	0.219134	8.5204e-07	7.43066e-06
ENSG00000047936.11	ROS1	HERVH_19q13.41a	0.219083	8.57123e-07	7.46033e-06
ENSG00000157764.14	BRAF	MER101_3q27.2	0.22679	3.4037e-07	7.51693e-06
ENSG00000171094.18	ALK	ERV316A3_7q31.1c	-0.233184	1.54246e-07	7.52417e-06
ENSG00000047936.11	ROS1	ERVLE_3p24.3a	0.218966	8.69039e-07	7.54924e-06
ENSG00000198400.12	NTRK1	ERVLE_4p16.1c	0.217014	1.09215e-06	7.73216e-06
ENSG00000157764.14	BRAF	HERVH_11q13.2d	0.226492	3.52984e-07	7.75692e-06
ENSG00000047936.11	ROS1	HERVH_6p21.2b	0.218524	9.15323e-07	7.92031e-06
ENSG00000141736.14	ERBB2	ERVLB4_2q37.3b	0.246698	2.68245e-08	7.93825e-06
ENSG00000198400.12	NTRK1	ERVLE_3p24.3a	0.216697	1.13328e-06	7.9851e-06
ENSG00000157168.20	NRG1	LTR25_12p11.22b	-0.232203	1.7444e-07	8.06601e-06
ENSG00000188389.11	PDCD1	HUERSP1_14q23.1	0.221694	6.29213e-07	8.07248e-06
ENSG00000120217.14	CD274	MER4_6p12.1	0.234016	1.38927e-07	8.11446e-06
ENSG00000165731.20	RET	HML2_4p16.1b	0.239802	6.63575e-08	8.18224e-06
ENSG00000047936.11	ROS1	HERVH_12p11.22a	0.218142	9.57355e-07	8.21992e-06
ENSG00000188389.11	PDCD1	ERV316A3_6p21.2a	0.221506	6.43399e-07	8.23069e-06
ENSG00000163599.17	CTLA4	HML6_19p13.2d	0.220851	6.95551e-07	8.23347e-06
ENSG00000198400.12	NTRK1	ERVLB4_9q22.2b	0.216373	1.17682e-06	8.27879e-06
ENSG00000163599.17	CTLA4	MER41_12p12.1b	0.220781	7.01361e-07	8.28016e-06
ENSG00000171094.18	ALK	ERV316A3_5q35.3a	0.232224	1.73967e-07	8.30366e-06
ENSG00000171094.18	ALK	HERVH_4q35.2c	0.232289	1.72567e-07	8.30366e-06
ENSG00000157764.14	BRAF	MER41_3p14.3a	0.225689	3.89175e-07	8.30552e-06
ENSG00000157764.14	BRAF	HERVL74_7q21.3a	0.225703	3.88496e-07	8.30552e-06
ENSG00000157764.14	BRAF	ERVLE_4q22.3a	0.225611	3.9287e-07	8.34425e-06
ENSG00000047936.11	ROS1	HARLEQUIN_1p13.2b	0.217983	9.75293e-07	8.35777e-06
ENSG00000157764.14	BRAF	HERVL_6q16.1a	0.225531	3.96723e-07	8.38596e-06
ENSG00000198400.12	NTRK1	HERV3_19q13.42c	0.216047	1.22223e-06	8.58462e-06
ENSG00000188389.11	PDCD1	ERVLB4_11p15.4c	0.220943	6.88007e-07	8.7509e-06
ENSG00000198400.12	NTRK1	HERVH_5q23.2e	0.215809	1.2563e-06	8.78222e-06
ENSG00000157764.14	BRAF	ERV316A3_4q24d	0.225107	4.17602e-07	8.78548e-06
ENSG00000188389.11	PDCD1	MER4_15q22.31b	0.220839	6.96517e-07	8.83383e-06
ENSG00000188389.11	PDCD1	HERVH_5q23.2e	0.220785	7.01025e-07	8.84049e-06
ENSG00000163599.17	CTLA4	MER4_19q13.41b	0.220178	7.53214e-07	8.86874e-06
ENSG00000157764.14	BRAF	MER41_6p23	-0.224972	4.24503e-07	8.87568e-06
ENSG00000157764.14	BRAF	ERVLB4_8q23.3c	0.224945	4.25889e-07	8.87568e-06
ENSG00000198400.12	NTRK1	HERVL40_4q31.3a	0.215692	1.27357e-06	8.88898e-06
ENSG00000120217.14	CD274	MER4_10q23.31a	0.233172	1.54489e-07	8.90621e-06
ENSG00000146648.19	EGFR	MER4_8q24.3e	0.236742	9.83204e-08	8.90703e-06
ENSG00000146648.19	EGFR	ERVLE_1p34.2h	0.236831	9.7204e-08	8.90703e-06
ENSG00000146648.19	EGFR	ERV316A3_14q12d	0.23694	9.58598e-08	8.90703e-06
ENSG00000146648.19	EGFR	HERVH_7q11.23b	0.236957	9.56577e-08	8.90703e-06
ENSG00000146648.19	EGFR	PABLA_2q32.2a	0.237418	9.01774e-08	8.90703e-06
ENSG00000157764.14	BRAF	LTR25_6q24.1	0.224861	4.30203e-07	8.9237e-06
ENSG00000198400.12	NTRK1	ERVLB4_18q22.2	0.215621	1.28397e-06	8.93346e-06
ENSG00000198400.12	NTRK1	HUERSP3_2q24.2	0.215608	1.28601e-06	8.93365e-06
ENSG00000171094.18	ALK	HARLEQUIN_17q21.33	0.231523	1.89871e-07	8.96636e-06
ENSG00000047936.11	ROS1	ERVLE_2p13.2a	0.217329	1.05284e-06	8.98759e-06
ENSG00000171094.18	ALK	MER4B_12q22	0.23141	1.92584e-07	8.99874e-06
ENSG00000163599.17	CTLA4	HERV3_11q13.3	0.220585	7.66828e-07	9.00516e-06
ENSG00000198400.12	NTRK1	ERV316A3_1q32.2a	0.215524	1.29852e-06	9.00648e-06
ENSG00000157168.20	NRG1	HERVL_17q12a	-0.230986	2.03007e-07	9.0115e-06
ENSG00000198400.12	NTRK1	HERVW_7q21.2	0.215487	1.30417e-06	9.03153e-06
ENSG00000047936.11	ROS1	HERVL40_22q11.23	0.217185	1.07063e-06	9.12192e-06
ENSG00000157764.14	BRAF	HERV3_19q13.42c	0.224517	4.48489e-07	9.21687e-06
ENSG00000188389.11	PDCD1	HERVFRD_6p24.2	0.220378	7.35641e-07	9.25074e-06
ENSG00000157168.20	NRG1	HML6_12q24.12a	-0.23132	2.11158e-07	9.25317e-06
ENSG00000157168.20	NRG1	HERV9_15q21.1a	-0.230614	2.12621e-07	9.25317e-06
ENSG00000165731.20	RET	HERVH_11q23.3a	0.238401	7.94926e-08	9.28599e-06
ENSG00000171094.18	ALK	HERVK11_6q25.3	0.230893	2.05365e-07	9.30217e-06
ENSG00000133703.13	KRAS	HERVH_7q34b	0.233596	1.46472e-07	9.42302e-06
ENSG00000146648.19	EGFR	HML1_15q21.2	0.236095	1.06761e-07	9.4782e-06
ENSG00000047936.11	ROS1	ERVLE_11q14.2c	0.216811	1.11833e-06	9.49191e-06
ENSG00000163599.17	CTLA4	HML4_19p12	0.21953	8.13164e-07	9.52411e-06
ENSG00000188389.11	PDCD1	ERV316A3_15q21.2a	0.220108	7.59534e-07	9.52422e-06
ENSG00000198400.12	NTRK1	HERVEA_19p13.3	0.214979	1.38291e-06	9.547e-06
ENSG00000198400.12	NTRK1	ERVLB4_3p21.31d	0.214846	1.40437e-06	9.65014e-06
ENSG00000163599.17	CTLA4	HML2_4p16.1b	0.219291	8.36397e-07	9.75228e-06
ENSG00000198400.12	NTRK1	HERVH_6q23.2c	0.214716	1.42562e-06	9.78106e-06
ENSG00000157764.14	BRAF	HERVH_5q21.2b	0.223939	4.80828e-07	9.7908e-06
ENSG00000157168.20	NRG1	HERVH_5p15.33	0.229902	2.32238e-07	9.81812e-06
ENSG00000120217.14	CD274	ERVLE_15q21.2	-0.232263	1.73133e-07	9.85306e-06
ENSG00000198400.12	NTRK1	HML3_1p21.3	0.214557	1.4519e-06	9.94594e-06
ENSG00000146648.19	EGFR	HERVH_7q34b	0.235405	1.16542e-07	9.94862e-06
ENSG00000157764.14	BRAF	HERVH48_8q21.2	0.223707	4.94487e-07	9.9774e-06
ENSG00000157764.14	BRAF	HERVE_11q13.4d	0.223738	4.92594e-07	9.9774e-06
ENSG00000165731.20	RET	HERVL_7p15.2a	0.237158	9.3224e-08	1.00254e-05
ENSG00000165731.20	RET	ERVLE_8q24.22b	0.237183	9.29243e-08	1.00254e-05
ENSG00000165731.20	RET	HERV4_4q12	0.237732	9.48567e-08	1.00254e-05
ENSG00000157764.14	BRAF	HERVE_2q37.1	-0.224107	5.05704e-07	1.01576e-05
ENSG00000146648.19	EGFR	HERVH_7q35a	0.235087	1.21343e-07	1.0163e-05
ENSG00000188389.11	PDCD1	ERVLB4_1p34.2b	-0.219507	8.15386e-07	1.01671e-05
ENSG00000157168.20	NRG1	MER61_7p15.3	0.229421	2.46454e-07	1.02244e-05
ENSG00000157764.14	BRAF	HERVS71_19p13.3	-0.223391	5.13593e-07	1.02695e-05
ENSG00000188389.11	PDCD1	HERV3_19q13.33	0.219264	8.39109e-07	1.04336e-05
ENSG00000198400.12	NTRK1	MER41_14q32.2	0.213993	1.54922e-06	1.05314e-05
ENSG00000047936.11	ROS1	HML1_22q12.2	0.215587	1.28915e-06	1.08587e-05
ENSG00000198400.12	NTRK1	HERVH_5q32b	0.213583	1.62382e-06	1.09546e-05
ENSG00000188389.11	PDCD1	ERVL_5q11.2	0.218768	8.89482e-07	1.09678e-05
ENSG00000157168.20	NRG1	HERVIP10F_19p13.11	-0.228751	2.67656e-07	1.10011e-05
ENSG00000157764.14	BRAF	HERVL_4p15.2a	0.222735	5.5566e-07	1.10609e-05
ENSG00000198400.12	NTRK1	ERVLE_1q32.2a	0.213472	1.64469e-06	1.10618e-05
ENSG00000133703.13	KRAS	HERVH_3q27.3a	0.231921	1.80689e-07	1.114e-05
ENSG00000133703.13	KRAS	ERV316A3_3q27.3c	0.231994	1.79036e-07	1.114e-05
ENSG00000133703.13	KRAS	MER4_5p12b	-0.231777	1.83962e-07	1.11864e-05
ENSG00000171094.18	ALK	ERVLB4_8p23.1e	0.229258	2.51472e-07	1.12756e-05
ENSG00000133703.13	KRAS	ERV316A3_21q22.3b	-0.231574	1.8869e-07	1.13189e-05
ENSG00000133703.13	KRAS	HERVH_2p24.3c	0.231232	1.96886e-07	1.14997e-05
ENSG00000188389.11	PDCD1	HERVH_3q26.1i	0.218151	9.56301e-07	1.16994e-05
ENSG00000047936.11	ROS1	HERVIP10FH_10p11.23	0.214817	1.40904e-06	1.18014e-05
ENSG00000188389.11	PDCD1	ERVLB4_2q37.1a	0.218564	9.70772e-07	1.18386e-05
ENSG00000047936.11	ROS1	ERVLE_7q31.32f	0.214773	1.41616e-06	1.18387e-05
ENSG00000198400.12	NTRK1	HERVH_Xq13.1a	0.212801	1.77604e-06	1.18733e-05
ENSG00000198400.12	NTRK1	HERVH_2q24.1e	0.21274	1.78827e-06	1.19371e-05
ENSG00000157764.14	BRAF	MER101_2p16.1	0.221941	6.1096e-07	1.19474e-05
ENSG00000157764.14	BRAF	MER61_10p15.1	0.221901	6.13858e-07	1.19514e-05
ENSG00000171094.18	ALK	MER4_14q22.3b	0.228662	2.70614e-07	1.20126e-05
ENSG00000171094.18	ALK	LTR25_3q26.33a	0.228555	2.74193e-07	1.20509e-05
ENSG00000171094.18	ALK	HERVL_3p24.3b	0.228393	2.79708e-07	1.20546e-05
ENSG00000171094.18	ALK	HERVW_6p23	0.228417	2.78911e-07	1.20546e-05
ENSG00000157764.14	BRAF	MER61_10q26.12	0.221666	6.3126e-07	1.21552e-05
ENSG00000165731.20	RET	ERVLE_Xq26.3h	0.235104	1.21078e-07	1.22151e-05
ENSG00000188389.11	PDCD1	MER41_4p16.1b	0.218237	1.00836e-06	1.22298e-05
ENSG00000163599.17	CTLA4	HERVH_17q25.3	0.217195	1.06938e-06	1.22345e-05
ENSG00000157764.14	BRAF	HERVFH21_10q22.1b	0.221486	6.44936e-07	1.234e-05
ENSG00000146648.19	EGFR	HML2_11q12.3b	-0.233301	1.51996e-07	1.24946e-05
ENSG00000163599.17	CTLA4	HERVL18_6q14.1	-0.216962	1.09889e-06	1.25398e-05
ENSG00000198400.12	NTRK1	HERVE_4p16.1c	0.212232	1.89502e-06	1.25552e-05
ENSG00000171094.18	ALK	MER61_3p26.1	0.227846	2.99129e-07	1.2646e-05
ENSG00000157764.14	BRAF	MER4_Xp11.21a	0.221205	6.66897e-07	1.26511e-05
ENSG00000047936.11	ROS1	HERVH_6q25.2a	0.213993	1.54933e-06	1.28792e-05
ENSG00000188389.11	PDCD1	LTR57_5q31.1	0.217186	1.07047e-06	1.29125e-05
ENSG00000188389.11	PDCD1	HERV3_7q33	0.217722	1.07039e-06	1.29125e-05
ENSG00000198400.12	NTRK1	HERVL40_4q32.1a	0.211959	1.95497e-06	1.29331e-05
ENSG00000171094.18	ALK	HERVL_10q23.33a	0.227579	3.09093e-07	1.2944e-05
ENSG00000171094.18	ALK	HERVL_13q12.12	0.227475	3.13057e-07	1.29875e-05
ENSG00000163599.17	CTLA4	HML6_8q12.1	0.216611	1.14464e-06	1.2995e-05
ENSG00000198400.12	NTRK1	HERVH_5q23.2a	0.211877	1.97327e-06	1.30347e-05
ENSG00000198400.12	NTRK1	ERV316A3_9q34.2a	0.211823	1.98542e-06	1.30955e-05
ENSG00000047936.11	ROS1	ERV316A3_6p22.1m	0.213766	1.59021e-06	1.31697e-05
ENSG00000047936.11	ROS1	HERVH_11q22.2	0.213768	1.58975e-06	1.31697e-05
ENSG00000171094.18	ALK	HERVL_12q12b	0.227258	3.21453e-07	1.32123e-05
ENSG00000198400.12	NTRK1	ERVLB4_4q23b	0.21168	2.01783e-06	1.32895e-05
ENSG00000157168.20	NRG1	HERVH_4p15.2b	0.227114	3.2717e-07	1.33239e-05
ENSG00000133703.13	KRAS	MER4_22q12.3	-0.230577	2.31339e-07	1.33365e-05
ENSG00000157168.20	NRG1	HERVH_4q32.3c	0.226955	3.3361e-07	1.34627e-05
ENSG00000157168.20	NRG1	HERVH_2p12h	0.226876	3.36811e-07	1.34694e-05
ENSG00000198400.12	NTRK1	HERVE_2q37.1	0.211402	2.08267e-06	1.3676e-05
ENSG00000157168.20	NRG1	ERV316A3_6q22.31g	0.226675	3.45197e-07	1.36815e-05
ENSG00000198400.12	NTRK1	HERVIP10F_3p25.3	0.211385	2.08665e-06	1.36819e-05
ENSG00000163599.17	CTLA4	HML5_12q23.1	0.216641	1.21261e-06	1.37316e-05
ENSG00000157764.14	BRAF	ERVLE_14q24.3	0.220339	7.39022e-07	1.37837e-05
ENSG00000163599.17	CTLA4	ERV316A3_9q34.2b	0.215993	1.22984e-06	1.38559e-05
ENSG00000146648.19	EGFR	ERVLE_5q22.2d	0.23231	1.72109e-07	1.38907e-05
ENSG00000047936.11	ROS1	HML3_Xq13.3	0.213248	1.6875e-06	1.38976e-05
ENSG00000171094.18	ALK	HERVW_7q21.2	0.22668	3.44983e-07	1.40493e-05
ENSG00000188389.11	PDCD1	HERVH_2p12h	-0.21636	1.17859e-06	1.41399e-05
ENSG00000133703.13	KRAS	HERVK11_6q25.3	0.229331	2.49201e-07	1.41821e-05
ENSG00000047936.11	ROS1	ERV316A3_6p22.1k	0.213013	1.73333e-06	1.42223e-05
ENSG00000133703.13	KRAS	ERVLB4_14q32.11a	0.229157	2.54605e-07	1.43062e-05
ENSG00000133703.13	KRAS	LTR46_9q22.33	0.228874	2.63646e-07	1.44484e-05
ENSG00000047936.11	ROS1	MER101_1p31.3	0.212853	1.76545e-06	1.44591e-05
ENSG00000157764.14	BRAF	HML1_10q22.1	0.219719	7.95221e-07	1.45867e-05
ENSG00000157764.14	BRAF	ERV316A3_8q22.1d	0.21973	7.94231e-07	1.45867e-05
ENSG00000047936.11	ROS1	HERVH_6q23.2a	0.212687	1.7993e-06	1.47092e-05
ENSG00000157764.14	BRAF	ERV316A3_16p12.1	0.219588	8.07618e-07	1.47532e-05
ENSG00000157764.14	BRAF	MER61_6q24.1c	0.219552	8.1106e-07	1.47553e-05
ENSG00000188389.11	PDCD1	HERVL18_3p21.31b	0.215929	1.23898e-06	1.47845e-05
ENSG00000047936.11	ROS1	HML6_3p25.1	0.212611	1.81479e-06	1.48085e-05
ENSG00000120217.14	CD274	ERVLB4_7q34b	-0.228724	2.68576e-07	1.48185e-05
ENSG00000198400.12	NTRK1	HUERSP3_7q31.1	0.210638	2.27092e-06	1.48244e-05
ENSG00000165731.20	RET	HERVL40_9q34.3	0.233067	1.56544e-07	1.51065e-05
ENSG00000146648.19	EGFR	HERVH_4q32.3d	0.231484	1.90797e-07	1.51241e-05
ENSG00000163599.17	CTLA4	HERVH_9q21.33c	0.215097	1.3642e-06	1.52536e-05
ENSG00000047936.11	ROS1	ERVLE_8p23.1b	0.212315	1.87727e-06	1.52902e-05
ENSG00000163599.17	CTLA4	HUERSP1_14q23.1	0.215054	1.37111e-06	1.52923e-05
ENSG00000120217.14	CD274	HERVL_6q24.1g	-0.228238	2.85088e-07	1.53146e-05
ENSG00000120217.14	CD274	HERVE_20p11.21b	0.228831	2.86351e-07	1.53146e-05
ENSG00000157168.20	NRG1	HERVH_1p11.2	-0.225659	3.90588e-07	1.53436e-05
ENSG00000198400.12	NTRK1	ERVLB4_8p23.1k	0.210255	2.37112e-06	1.54558e-05
ENSG00000146648.19	EGFR	HERVH_11q14.2	0.231167	1.98482e-07	1.54572e-05
ENSG00000198400.12	NTRK1	HERV30_11q14.2	0.210149	2.39968e-06	1.5619e-05
ENSG00000146648.19	EGFR	HERVL74_7q21.3a	0.230778	2.08332e-07	1.56743e-05
ENSG00000146648.19	EGFR	HERVL74_6p25.1	0.231484	2.06945e-07	1.56743e-05
ENSG00000157764.14	BRAF	MER101_3q26.31	0.218996	8.65962e-07	1.56898e-05
ENSG00000188389.11	PDCD1	ERVLB4_3q25.31a	0.215284	1.33515e-06	1.58468e-05
ENSG00000165731.20	RET	HERVL74_10p11.22	0.23316	1.68213e-07	1.58872e-05
ENSG00000165731.20	RET	MER61_7q21.11	-0.23231	1.72105e-07	1.59162e-05
ENSG00000047936.11	ROS1	ERVLB4_10q26.2b	0.211865	1.97596e-06	1.6006e-05
ENSG00000171094.18	ALK	HERVH_3q26.31c	0.225115	4.17207e-07	1.62454e-05
ENSG00000171094.18	ALK	HERVH_20q13.12a	0.225135	4.16206e-07	1.62454e-05
ENSG00000171094.18	ALK	HARLEQUIN_18p11.22b	0.225223	4.11789e-07	1.62454e-05
ENSG00000198400.12	NTRK1	ERV316A3_3q25.2c	-0.209689	2.52724e-06	1.63058e-05
ENSG00000047936.11	ROS1	HERVP71A_2q32.2	0.211662	2.02203e-06	1.63196e-05
ENSG00000188389.11	PDCD1	MER4_12q12a	0.214955	1.38679e-06	1.63288e-05
ENSG00000157764.14	BRAF	ERV316A3_1q44b	0.218387	9.30229e-07	1.63537e-05
ENSG00000157764.14	BRAF	HERVL_1q42.13	0.218395	9.29329e-07	1.63537e-05
ENSG00000157764.14	BRAF	HERVH_9q22.32	0.218427	9.25837e-07	1.63537e-05
ENSG00000157764.14	BRAF	MER41_3q13.13	0.218481	9.20002e-07	1.63537e-05
ENSG00000171094.18	ALK	HERV3_2q14.3	0.224904	4.28003e-07	1.63785e-05
ENSG00000171094.18	ALK	HERVH_15q25.2	0.224974	4.24411e-07	1.63785e-05
ENSG00000188389.11	PDCD1	HERVH_20p12.1a	-0.214883	1.39835e-06	1.63995e-05
ENSG00000188389.11	PDCD1	ERVLE_10p15.1c	-0.214849	1.40388e-06	1.63995e-05
ENSG00000141736.14	ERBB2	HERVW_5p13.2a	0.23957	6.8376e-08	1.65317e-05
ENSG00000141736.14	ERBB2	HERVH_19p13.2d	0.240037	7.07599e-08	1.65317e-05
ENSG00000165731.20	RET	ERV316A3_3q13.12c	0.231743	1.84741e-07	1.6736e-05
ENSG00000157168.20	NRG1	HERVH_4q32.3d	0.224861	4.30229e-07	1.67525e-05
ENSG00000047936.11	ROS1	HERVW_7q31.32	0.211375	2.08898e-06	1.67685e-05
ENSG00000133703.13	KRAS	ERVLE_3q11.2h	0.227433	3.14665e-07	1.68289e-05
ENSG00000198400.12	NTRK1	HERVL18_6q14.1	-0.209386	2.61508e-06	1.68481e-05
ENSG00000047936.11	ROS1	MER4B_12p13.31c	0.211193	2.13249e-06	1.70869e-05
ENSG00000157764.14	BRAF	HERVW_12q13.3	0.217893	9.85601e-07	1.70902e-05
ENSG00000188389.11	PDCD1	HERVH_20p11.23b	-0.214369	1.48369e-06	1.72411e-05
ENSG00000157764.14	BRAF	LTR23_4p16.3b	0.217602	1.01979e-06	1.7546e-05
ENSG00000198400.12	NTRK1	LTR57_2q37.1	0.208939	2.74969e-06	1.75877e-05
ENSG00000146648.19	EGFR	HERVH_15q26.3a	0.229607	2.40844e-07	1.78184e-05
ENSG00000146648.19	EGFR	ERVLB4_1q23.3c	0.229399	2.47111e-07	1.79824e-05
ENSG00000047936.11	ROS1	HERVIP10FH_Xp21.1	0.210627	2.27356e-06	1.80542e-05
ENSG00000157764.14	BRAF	HML3_5p15.33d	0.217795	1.06132e-06	1.80587e-05
ENSG00000188389.11	PDCD1	PRIMA4_8p22	0.213916	1.56304e-06	1.80686e-05
ENSG00000157764.14	BRAF	MER4_Xq21.31f	0.217156	1.07422e-06	1.82002e-05
ENSG00000047936.11	ROS1	ERV316A3_5q35.3d	0.210538	2.29658e-06	1.82045e-05
ENSG00000198400.12	NTRK1	MER41_2q31.2	0.208585	2.86079e-06	1.82196e-05
ENSG00000188389.11	PDCD1	HERVH_13q13.3a	0.213788	1.58607e-06	1.82872e-05
ENSG00000198400.12	NTRK1	ERV316A3_5q14.3a	0.208502	2.88753e-06	1.83372e-05
ENSG00000157764.14	BRAF	HERVL18_5q34	-0.217	1.09402e-06	1.83918e-05
ENSG00000157764.14	BRAF	HML2_9q34.11	0.216969	1.09796e-06	1.83918e-05
ENSG00000157764.14	BRAF	ERV316A3_8q21.13j	0.216911	1.10543e-06	1.84474e-05
ENSG00000047936.11	ROS1	MER41_4p16.1b	0.210338	2.34898e-06	1.85867e-05
ENSG00000047936.11	ROS1	HERVIP10F_19p13.11	0.210274	2.36627e-06	1.86901e-05
ENSG00000157168.20	NRG1	HERVH_20p12.1a	0.223754	4.91689e-07	1.88564e-05
ENSG00000188389.11	PDCD1	ERVLE_6p21.32	0.213492	1.641e-06	1.88714e-05
ENSG00000188389.11	PDCD1	HERVEA_19p13.3	0.213427	1.65324e-06	1.89143e-05
ENSG00000188389.11	PDCD1	HERVH_9q21.33c	0.213398	1.65862e-06	1.8927e-05
ENSG00000157764.14	BRAF	HERVH_3q25.2b	0.216597	1.14649e-06	1.90508e-05
ENSG00000157764.14	BRAF	MER61_6q15	0.216536	1.15472e-06	1.9055e-05
ENSG00000120217.14	CD274	HERVH_12q13.2b	0.226218	3.6494e-07	1.92853e-05
ENSG00000188389.11	PDCD1	PABLB_10p15.1b	-0.213164	1.70368e-06	1.93913e-05
ENSG00000198400.12	NTRK1	ERV316A3_5p13.3e	0.207902	3.0877e-06	1.94416e-05
ENSG00000198400.12	NTRK1	HERVL40_15q23	0.207909	3.08517e-06	1.94416e-05
ENSG00000188389.11	PDCD1	MER61_5q23.2b	0.213093	1.71764e-06	1.9472e-05
ENSG00000157764.14	BRAF	HERV3_4p16.1	0.2163	1.18685e-06	1.95127e-05
ENSG00000047936.11	ROS1	HERVW_11q14.2	0.209796	2.49718e-06	1.96891e-05
ENSG00000198400.12	NTRK1	HERVIP10FH_6q15a	0.207753	3.13942e-06	1.97352e-05
ENSG00000047936.11	ROS1	MER4_3p21.31b	0.209688	2.52768e-06	1.98943e-05
ENSG00000157764.14	BRAF	HERVEA_5q22.2	-0.215968	1.23336e-06	2.00545e-05
ENSG00000047936.11	ROS1	MER4_Xq21.1a	0.209523	2.57501e-06	2.01952e-05
ENSG00000047936.11	ROS1	HERVH_9q34.13	0.209529	2.57342e-06	2.01952e-05
ENSG00000171094.18	ALK	PRIMAX_22q11.21	0.222788	5.52144e-07	2.02559e-05
ENSG00000198400.12	NTRK1	ERVLB4_1q25.1b	0.207289	3.30593e-06	2.064e-05
ENSG00000188389.11	PDCD1	HERVL18_Xq28	-0.212488	1.84056e-06	2.07367e-05
ENSG00000157168.20	NRG1	HERVH_6q16.1a	0.222814	5.50391e-07	2.08819e-05
ENSG00000171094.18	ALK	ERVL_7p12.1a	0.222388	5.79209e-07	2.09033e-05
ENSG00000047936.11	ROS1	LTR19_12p13.31	0.209173	2.67818e-06	2.09303e-05
ENSG00000171094.18	ALK	HERVH_16q24.1a	0.222283	5.86517e-07	2.09964e-05
ENSG00000146648.19	EGFR	HERVL_7q32.1	0.227978	2.94349e-07	2.10744e-05
ENSG00000157168.20	NRG1	HERVL18_2q31.1	-0.222634	5.62354e-07	2.1155e-05
ENSG00000120217.14	CD274	HERVFH21_Xq11.2b	0.22535	4.05493e-07	2.11763e-05
ENSG00000146648.19	EGFR	HERVH_7q21.3b	0.22775	3.02686e-07	2.13273e-05
ENSG00000188389.11	PDCD1	ERVLE_4p12e	0.212141	1.91479e-06	2.15183e-05
ENSG00000120217.14	CD274	HERVP71A_12p13.33b	0.225081	4.18911e-07	2.16226e-05
ENSG00000188389.11	PDCD1	HERVFRD_1q31.3	-0.212075	1.9293e-06	2.16267e-05
ENSG00000198400.12	NTRK1	HERVL40_7q21.12b	0.206781	3.49784e-06	2.17464e-05
ENSG00000157764.14	BRAF	HERVFRD_4q31.21	0.215172	1.35246e-06	2.17521e-05
ENSG00000146648.19	EGFR	PRIMA4_1q24.3	0.227283	3.20479e-07	2.18863e-05
ENSG00000146648.19	EGFR	ERV316A3_3q27.1a	-0.227144	3.25974e-07	2.19243e-05
ENSG00000198400.12	NTRK1	ERVLE_5q12.3a	0.206669	3.54153e-06	2.19568e-05
ENSG00000165731.20	RET	HERVEA_3q25.32	0.229347	2.48708e-07	2.20803e-05
ENSG00000198400.12	NTRK1	ERV316A3_15q25.1b	0.206603	3.56755e-06	2.20869e-05
ENSG00000047936.11	ROS1	ERVLE_5p15.33a	0.208511	2.88452e-06	2.23853e-05
ENSG00000198400.12	NTRK1	LTR23_Xp11.21	0.20639	3.65293e-06	2.25527e-05
ENSG00000157764.14	BRAF	MER101_6q16.1	0.214822	1.40824e-06	2.25675e-05
ENSG00000047936.11	ROS1	HERV3_7q34a	0.208391	2.92361e-06	2.26491e-05
ENSG00000188389.11	PDCD1	MER4_7p22.1	0.211578	2.04147e-06	2.2769e-05
ENSG00000047936.11	ROS1	HERV3_19p12e	0.208308	2.95088e-06	2.27808e-05
ENSG00000171094.18	ALK	HERVH_11q23.3a	0.22151	6.43109e-07	2.28381e-05
ENSG00000047936.11	ROS1	PABLB_10p15.1b	-0.208236	2.97447e-06	2.28833e-05
ENSG00000133703.13	KRAS	HML4_10p15.1	0.224482	4.5039e-07	2.32475e-05
ENSG00000133703.13	KRAS	HERVL18_6q14.1	0.224571	4.45559e-07	2.32475e-05
ENSG00000198400.12	NTRK1	ERV316A3_12q21.33e	-0.206074	3.78253e-06	2.32711e-05
ENSG00000198400.12	NTRK1	HERVL_10p13b	0.206055	3.79056e-06	2.32729e-05
ENSG00000198400.12	NTRK1	ERV316A3_2q32.2b	0.206042	3.79594e-06	2.32737e-05
ENSG00000157764.14	BRAF	PRIMA4_Xq23	0.214514	1.4592e-06	2.33e-05
ENSG00000047936.11	ROS1	MER61_11q13.4	0.208027	3.04478e-06	2.33433e-05
ENSG00000047936.11	ROS1	HML5_8p23.2b	0.20799	3.05735e-06	2.33993e-05
ENSG00000157764.14	BRAF	ERV316A3_3q22.2b	0.21439	1.48006e-06	2.35484e-05
ENSG00000157764.14	BRAF	ERV316A3_2p16.1a	0.214866	1.48631e-06	2.35634e-05
ENSG00000188389.11	PDCD1	ERV316A3_2q35f	0.211192	2.13286e-06	2.36694e-05
ENSG00000165731.20	RET	HERVH_9q21.33c	0.228546	2.74503e-07	2.38925e-05
ENSG00000157764.14	BRAF	HERVL40_19p13.11	0.214052	1.53874e-06	2.41359e-05
ENSG00000157764.14	BRAF	HERVEA_19q13.33	0.21406	1.53731e-06	2.41359e-05
ENSG00000146648.19	EGFR	ERV316A3_4q35.2b	0.226065	3.71799e-07	2.42708e-05
ENSG00000146648.19	EGFR	HARLEQUIN_10q23.1	0.226088	3.70767e-07	2.42708e-05
ENSG00000165731.20	RET	HERVH_4p16.1b	0.228042	2.9203e-07	2.44589e-05
ENSG00000171094.18	ALK	HERVW_2p22.3	0.220635	7.13564e-07	2.45889e-05
ENSG00000047936.11	ROS1	ERVLE_1p13.3b	0.207425	3.25615e-06	2.47078e-05
ENSG00000047936.11	ROS1	HERVL_2q36.1a	0.207395	3.26728e-06	2.47499e-05
ENSG00000157764.14	BRAF	MER41_14q32.2	0.213735	1.59578e-06	2.4855e-05
ENSG00000198400.12	NTRK1	ERV316A3_3q27.3e	0.205388	4.08034e-06	2.488e-05
ENSG00000047936.11	ROS1	HERVI_16q22.2	0.207296	3.30335e-06	2.48957e-05
ENSG00000047936.11	ROS1	HUERSP3_7q31.1	0.207309	3.29842e-06	2.48957e-05
ENSG00000157764.14	BRAF	HML6_14q12a	0.213644	1.61256e-06	2.50285e-05
ENSG00000163599.17	CTLA4	MER41_6q22.31b	0.210598	2.28103e-06	2.50632e-05
ENSG00000188389.11	PDCD1	HERVH48_8q24.13	0.210636	2.27125e-06	2.50798e-05
ENSG00000047936.11	ROS1	HML6_20p13	0.207191	3.34204e-06	2.51021e-05
ENSG00000188389.11	PDCD1	HERVH_4q22.3a	0.210605	2.27919e-06	2.51051e-05
ENSG00000120217.14	CD274	HML3_15q11.2	-0.223453	5.09789e-07	2.51439e-05
ENSG00000198400.12	NTRK1	MER41_19q13.43b	0.205239	4.1476e-06	2.51863e-05
ENSG00000188389.11	PDCD1	ERVLE_8p23.1e	0.210554	2.29249e-06	2.51891e-05
ENSG00000157764.14	BRAF	HERVW_5q12.1	0.213474	1.64426e-06	2.54315e-05
ENSG00000198400.12	NTRK1	HUERSP3B_1q24.2	0.205078	4.22192e-06	2.56026e-05
ENSG00000163599.17	CTLA4	ERVL_11p14.3	0.210385	2.33656e-06	2.56099e-05
ENSG00000157764.14	BRAF	HERVH_1p34.1	0.213308	1.67596e-06	2.58319e-05
ENSG00000198400.12	NTRK1	HERVH_11q14.3	0.204983	4.26616e-06	2.58356e-05
ENSG00000198400.12	NTRK1	HARLEQUIN_17q25.3a	0.204917	4.29746e-06	2.59897e-05
ENSG00000157764.14	BRAF	HERVL40_22q13.2	0.21319	1.69866e-06	2.60911e-05
ENSG00000188389.11	PDCD1	ERV316A3_20q13.33b	0.210158	2.39742e-06	2.62122e-05
ENSG00000188389.11	PDCD1	HERVL40_9p24.1a	0.210178	2.39193e-06	2.62122e-05
ENSG00000163599.17	CTLA4	LTR57_22q12.2	0.210097	2.41387e-06	2.62627e-05
ENSG00000198400.12	NTRK1	HERVFRD_14q11.2	0.204628	4.43586e-06	2.6723e-05
ENSG00000171094.18	ALK	LTR46_16q23.1	0.219789	7.88738e-07	2.67268e-05
ENSG00000133703.13	KRAS	HERVH_8q22.3a	-0.223111	5.31162e-07	2.67935e-05
ENSG00000157168.20	NRG1	HERVL_6q22.31a	0.220425	7.31541e-07	2.68373e-05
ENSG00000146648.19	EGFR	MER4B_12p12.1a	0.225081	4.18916e-07	2.69503e-05
ENSG00000198400.12	NTRK1	HML3_6p22.1	0.204403	4.5471e-06	2.73134e-05
ENSG00000163599.17	CTLA4	HERVL_10p13c	0.209665	2.53424e-06	2.75049e-05
ENSG00000157764.14	BRAF	HML1_19q13.41a	0.212664	1.8039e-06	2.75173e-05
ENSG00000157764.14	BRAF	HERVL_3p24.3c	0.212514	1.83507e-06	2.78016e-05
ENSG00000146648.19	EGFR	ERVLE_4q22.3a	0.224693	4.39028e-07	2.78406e-05
ENSG00000141736.14	ERBB2	ERVLE_8q11.21a	0.234054	1.38265e-07	2.78981e-05
ENSG00000157168.20	NRG1	HML5_1q32.1	-0.219976	7.71493e-07	2.8071e-05
ENSG00000198400.12	NTRK1	HERVL18_11q14.2a	0.204104	4.69855e-06	2.80712e-05
ENSG00000188389.11	PDCD1	MER4_Xq21.31g	-0.209497	2.58247e-06	2.8097e-05
ENSG00000171094.18	ALK	MER4_11q14.1	0.219107	8.5474e-07	2.81051e-05
ENSG00000171094.18	ALK	ERVLE_2p14a	0.219137	8.5167e-07	2.81051e-05
ENSG00000163599.17	CTLA4	MER4_8q24.3b	0.209922	2.59701e-06	2.81173e-05
ENSG00000047936.11	ROS1	HERVS71_1p35.1	0.206093	3.77495e-06	2.8163e-05
ENSG00000047936.11	ROS1	ERVLE_1q23.2b	0.206103	3.77079e-06	2.8163e-05
ENSG00000047936.11	ROS1	HML6_7p13	0.206008	3.8103e-06	2.83316e-05
ENSG00000157764.14	BRAF	ERV316A3_5p15.32a	0.212224	1.89674e-06	2.86383e-05
ENSG00000188389.11	PDCD1	ERVLE_5p13.3m	-0.209258	2.65292e-06	2.8793e-05
ENSG00000188389.11	PDCD1	HML3_6p22.1	0.209216	2.66542e-06	2.8858e-05
ENSG00000047936.11	ROS1	HML5_12q12a	0.205774	3.91008e-06	2.89764e-05
ENSG00000157764.14	BRAF	HERVL40_6q24.1	0.21209	1.92594e-06	2.89805e-05
ENSG00000047936.11	ROS1	MER4B_9p13.3	0.205632	3.97213e-06	2.93473e-05
ENSG00000146648.19	EGFR	MER4_7p11.2f	0.224109	4.71121e-07	2.9455e-05
ENSG00000163599.17	CTLA4	HERVIP10FH_6q25.3	0.208979	2.73714e-06	2.94907e-05
ENSG00000047936.11	ROS1	LTR19_19p13.2b	0.205555	4.00599e-06	2.95392e-05
ENSG00000188389.11	PDCD1	HERVL_1p31.1d	0.208945	2.74757e-06	2.96751e-05
ENSG00000157764.14	BRAF	HML3_10q22.1	0.211795	1.99156e-06	2.97661e-05
ENSG00000188389.11	PDCD1	HML3_4q31.3	0.208868	2.77157e-06	2.98616e-05
ENSG00000198400.12	NTRK1	ERV316A3_8q23.1c	0.203475	5.03303e-06	2.99888e-05
ENSG00000047936.11	ROS1	HERVH48_1p22.3	0.205368	4.08946e-06	3.00051e-05
ENSG00000198400.12	NTRK1	ERVLE_8q24.11	0.203399	5.07462e-06	3.0196e-05
ENSG00000141736.14	ERBB2	ERV316A3_21q22.11b	0.232713	1.77802e-07	3.03564e-05
ENSG00000198400.12	NTRK1	HERVFRD_18p11.23	0.203305	5.12734e-06	3.04689e-05
ENSG00000157168.20	NRG1	HERVL_3q26.1f	0.219192	8.46205e-07	3.05391e-05
ENSG00000171094.18	ALK	HERVFRD_2p11.2	0.218266	9.4352e-07	3.05714e-05
ENSG00000198400.12	NTRK1	HERVH_22q12.1	-0.203205	5.18332e-06	3.07603e-05
ENSG00000141736.14	ERBB2	HERVEA_Xp11.21	0.231587	1.88371e-07	3.09696e-05
ENSG00000133703.13	KRAS	MER61_6q22.33	0.22161	6.35495e-07	3.09996e-05
ENSG00000133703.13	KRAS	HERVH_7q34a	0.221693	6.29248e-07	3.09996e-05
ENSG00000146648.19	EGFR	HERVP71A_2q32.2	0.223552	5.03746e-07	3.10573e-05
ENSG00000171094.18	ALK	HERVE_11q13.2a	0.218062	9.66289e-07	3.10823e-05
ENSG00000163599.17	CTLA4	HERVH_6q22.31g	-0.208423	2.91321e-06	3.12436e-05
ENSG00000198400.12	NTRK1	ERV316A3_5q35.3c	0.203044	5.2751e-06	3.12632e-05
ENSG00000047936.11	ROS1	HML2_19q13.12b	0.204904	4.30357e-06	3.14721e-05
ENSG00000157764.14	BRAF	HERVH_4q13.3	0.211208	2.12894e-06	3.15012e-05
ENSG00000157764.14	BRAF	ERV316A3_6p25.1c	0.211208	2.12882e-06	3.15012e-05
ENSG00000157764.14	BRAF	HML3_19q13.41a	0.211263	2.11576e-06	3.15012e-05
ENSG00000198400.12	NTRK1	HML5_Xq21.33	0.202949	5.32981e-06	3.15033e-05
ENSG00000157764.14	BRAF	MER61_7p13	0.211158	2.14109e-06	3.15758e-05
ENSG00000198400.12	NTRK1	HERVH_4q32.2c	0.202859	5.38238e-06	3.17718e-05
ENSG00000163599.17	CTLA4	LTR19_19p13.2b	0.208056	3.03494e-06	3.22428e-05
ENSG00000163599.17	CTLA4	HERV3_19q13.33	0.208069	3.0305e-06	3.22428e-05
ENSG00000163599.17	CTLA4	HERVH_5q23.2e	0.207975	3.06268e-06	3.24469e-05
ENSG00000157764.14	BRAF	HERVL_Xq21.2d	0.210842	2.21893e-06	3.26154e-05
ENSG00000047936.11	ROS1	HUERSP3_2p25.2	0.204371	4.5631e-06	3.29896e-05
ENSG00000188389.11	PDCD1	MER4_6p22.3d	0.207898	3.08892e-06	3.30403e-05
ENSG00000157168.20	NRG1	ERVLB4_14q32.11a	0.218091	9.6307e-07	3.3399e-05
ENSG00000157168.20	NRG1	HERVH_5q14.3b	0.218178	9.53246e-07	3.3399e-05
ENSG00000047936.11	ROS1	HERVH_1p31.1k	-0.204238	4.62982e-06	3.34175e-05
ENSG00000146648.19	EGFR	ERVLB4_3q26.33b	0.222781	5.52552e-07	3.35997e-05
ENSG00000171094.18	ALK	MER101_Xq23a	0.217246	1.06301e-06	3.37049e-05
ENSG00000047936.11	ROS1	MER4_7q21.2	0.204106	4.69737e-06	3.37405e-05
ENSG00000188389.11	PDCD1	ERV316A3_4q21.1m	0.207684	3.1635e-06	3.37567e-05
ENSG00000188389.11	PDCD1	ERVLE_12q14.3a	0.207637	3.1803e-06	3.38546e-05
ENSG00000157168.20	NRG1	HERVH_3p14.3a	0.217892	9.85743e-07	3.39202e-05
ENSG00000047936.11	ROS1	ERV316A3_18q22.3e	0.204034	4.73449e-06	3.39521e-05
ENSG00000198400.12	NTRK1	MER41_1q44b	0.202168	5.80204e-06	3.40678e-05
ENSG00000188389.11	PDCD1	HML3_7q11.21	-0.207527	3.21928e-06	3.41206e-05
ENSG00000188389.11	PDCD1	ERVL_11p14.3	0.207524	3.22067e-06	3.41206e-05
ENSG00000146648.19	EGFR	ERVL_14q12	0.222427	5.76504e-07	3.41213e-05
ENSG00000120217.14	CD274	HERV30_3p12.2	-0.220602	7.16342e-07	3.41889e-05
ENSG00000163599.17	CTLA4	HML3_9q34.13	0.207313	3.29693e-06	3.45836e-05
ENSG00000188389.11	PDCD1	HERVH_2q35a	-0.20732	3.29431e-06	3.48178e-05
ENSG00000165731.20	RET	HUERSP3_2p25.2	0.224856	4.30495e-07	3.48894e-05
ENSG00000171094.18	ALK	HERVH_6q12c	0.216728	1.1292e-06	3.49057e-05
ENSG00000171094.18	ALK	ERVLE_7q21.2	0.216812	1.11816e-06	3.49057e-05
ENSG00000171094.18	ALK	HERVH_11q24.2b	0.216832	1.11561e-06	3.49057e-05
ENSG00000188389.11	PDCD1	HERVH_6q12c	-0.207265	3.31475e-06	3.49505e-05
ENSG00000198400.12	NTRK1	HML3_9q34.13	0.201864	5.99619e-06	3.50686e-05
ENSG00000047936.11	ROS1	HERVL_3p13b	0.203683	4.91993e-06	3.51684e-05
ENSG00000157168.20	NRG1	HERVH_4q24b	0.217449	1.03818e-06	3.51794e-05
ENSG00000133703.13	KRAS	ERVLB4_Xq26.2a	0.220415	7.32381e-07	3.53374e-05
ENSG00000171094.18	ALK	HERVH_7q21.2	0.216534	1.15496e-06	3.53578e-05
ENSG00000141736.14	ERBB2	MER41_6p22.3	-0.230586	2.31067e-07	3.53692e-05
ENSG00000171094.18	ALK	MER41_6q14.1b	0.216324	1.18352e-06	3.54977e-05
ENSG00000171094.18	ALK	HUERSP3B_3q26.31b	0.216403	1.17274e-06	3.54977e-05
ENSG00000198400.12	NTRK1	HERVH_10q24.2a	0.201736	6.08012e-06	3.55127e-05
ENSG00000188389.11	PDCD1	HML4_19p12	0.207067	3.38845e-06	3.55587e-05
ENSG00000163599.17	CTLA4	HERVH_13q13.3a	0.207012	3.4094e-06	3.56102e-05
ENSG00000157764.14	BRAF	HERVW_5p12	0.209873	2.47553e-06	3.60291e-05
ENSG00000047936.11	ROS1	MER4_5p13.2a	0.203414	5.0664e-06	3.60991e-05
ENSG00000188389.11	PDCD1	HERVL40_2p24.2	-0.206882	3.45871e-06	3.61252e-05
ENSG00000157764.14	BRAF	HERVW_5p13.2a	0.209796	2.49703e-06	3.62233e-05
ENSG00000157168.20	NRG1	MER34B_7q36.3a	-0.217092	1.08226e-06	3.6395e-05
ENSG00000198400.12	NTRK1	HERVH_7p21.1a	0.201479	6.25128e-06	3.64166e-05
ENSG00000171094.18	ALK	HERV9_10q23.33	0.21601	1.22736e-06	3.65656e-05
ENSG00000157764.14	BRAF	HML5_2q32.1	0.209681	2.52973e-06	3.65781e-05
ENSG00000171094.18	ALK	MER4_Xq22.3c	0.215846	1.25094e-06	3.70195e-05
ENSG00000198400.12	NTRK1	HERVFH21_8q11.21	0.201297	6.37571e-06	3.70928e-05
ENSG00000133703.13	KRAS	HERVL18_4q21.1	-0.219784	7.89127e-07	3.7666e-05
ENSG00000171094.18	ALK	HML3_12q13.12	0.215636	1.28185e-06	3.7683e-05
ENSG00000188389.11	PDCD1	MER61_3p11.2	0.206477	3.61768e-06	3.76969e-05
ENSG00000188389.11	PDCD1	HERVFH19_Xp11.3b	-0.206455	3.62647e-06	3.77e-05
ENSG00000198400.12	NTRK1	ERVLE_11q13.5a	0.201089	6.52012e-06	3.78337e-05
ENSG00000198400.12	NTRK1	HERVK14C_16p12.3	0.201068	6.53534e-06	3.78726e-05
ENSG00000163599.17	CTLA4	HERVL32_2q31.3	0.206435	3.63466e-06	3.78738e-05
ENSG00000188389.11	PDCD1	ERV316A3_22q13.31a	-0.206381	3.65619e-06	3.79202e-05
ENSG00000188389.11	PDCD1	ERV316A3_9q32a	0.2063	3.68947e-06	3.81761e-05
ENSG00000157168.20	NRG1	HERVL_7p15.2a	-0.216566	1.15069e-06	3.84053e-05
ENSG00000198400.12	NTRK1	ERVLE_6p22.1a	0.200861	6.68272e-06	3.86761e-05
ENSG00000133703.13	KRAS	HERVW_5p12	0.219365	8.29106e-07	3.883e-05
ENSG00000157168.20	NRG1	HERVIP10F_2p12	0.216389	1.17465e-06	3.89126e-05
ENSG00000047936.11	ROS1	ERVLB4_19p13.11	0.202655	5.5029e-06	3.89185e-05
ENSG00000133703.13	KRAS	ERVLB4_2q37.3b	-0.219215	8.43972e-07	3.90249e-05
ENSG00000146648.19	EGFR	LTR23_7p11.2	0.221004	6.82972e-07	3.93729e-05
ENSG00000171094.18	ALK	HERVH_9q21.13b	0.215182	1.35092e-06	3.94521e-05
ENSG00000047936.11	ROS1	HERVH48_8q24.13	0.202503	5.59459e-06	3.94824e-05
ENSG00000141736.14	ERBB2	HML3_5p15.33d	0.228522	2.97315e-07	3.99934e-05
ENSG00000198400.12	NTRK1	ERVLB4_10q26.2b	0.200468	6.9715e-06	4.02425e-05
ENSG00000188389.11	PDCD1	MER4_19q13.41b	0.20572	3.93377e-06	4.05151e-05
ENSG00000165731.20	RET	ERVLE_10q26.3d	0.223282	5.20352e-07	4.05235e-05
ENSG00000165731.20	RET	LTR25_12p11.22b	0.223423	5.11616e-07	4.05235e-05
ENSG00000188389.11	PDCD1	HERVEA_Xq27.2	-0.205688	3.94761e-06	4.05635e-05
ENSG00000198400.12	NTRK1	MER4_10p15.1	-0.20037	7.04511e-06	4.06146e-05
ENSG00000047936.11	ROS1	PABLA_6q27a	0.202163	5.80523e-06	4.071e-05
ENSG00000157764.14	BRAF	MER41_14q12	0.208618	2.85035e-06	4.09472e-05
ENSG00000163599.17	CTLA4	HERVL_12p13.1c	0.206132	3.94905e-06	4.09576e-05
ENSG00000171094.18	ALK	HERVH_6p21.1	0.214743	1.42111e-06	4.09629e-05
ENSG00000171094.18	ALK	HERVH_3q11.1	0.21479	1.4134e-06	4.09629e-05
ENSG00000133703.13	KRAS	HERVH_Xp22.32a	0.218577	9.09712e-07	4.14367e-05
ENSG00000157168.20	NRG1	HERVH_Xp22.32a	0.215655	1.27906e-06	4.14433e-05
ENSG00000188389.11	PDCD1	HUERSP3B_1p33a	0.205374	4.08672e-06	4.18959e-05
ENSG00000171094.18	ALK	MER4B_12p12.1a	0.21439	1.48004e-06	4.21148e-05
ENSG00000198400.12	NTRK1	PRIMA4_21q22.3	0.199972	7.35287e-06	4.23339e-05
ENSG00000157764.14	BRAF	PABLA_19q13.32	0.208229	2.97687e-06	4.23536e-05
ENSG00000047936.11	ROS1	HERVW_11q14.1	0.201741	6.07692e-06	4.2548e-05
[truncated: 26,848 more rows]
